# Supplementary material for: Whole-Transcriptome Sequencing Reveals the Global Molecular Responses and NAC Transcription Factors Involved in Drought Stress in Dendrobium catenatum
Source: MDPI journal article supplement (doi:10.3390/antiox13010094), 2024-01-12
Supplement: s1 [file s1]

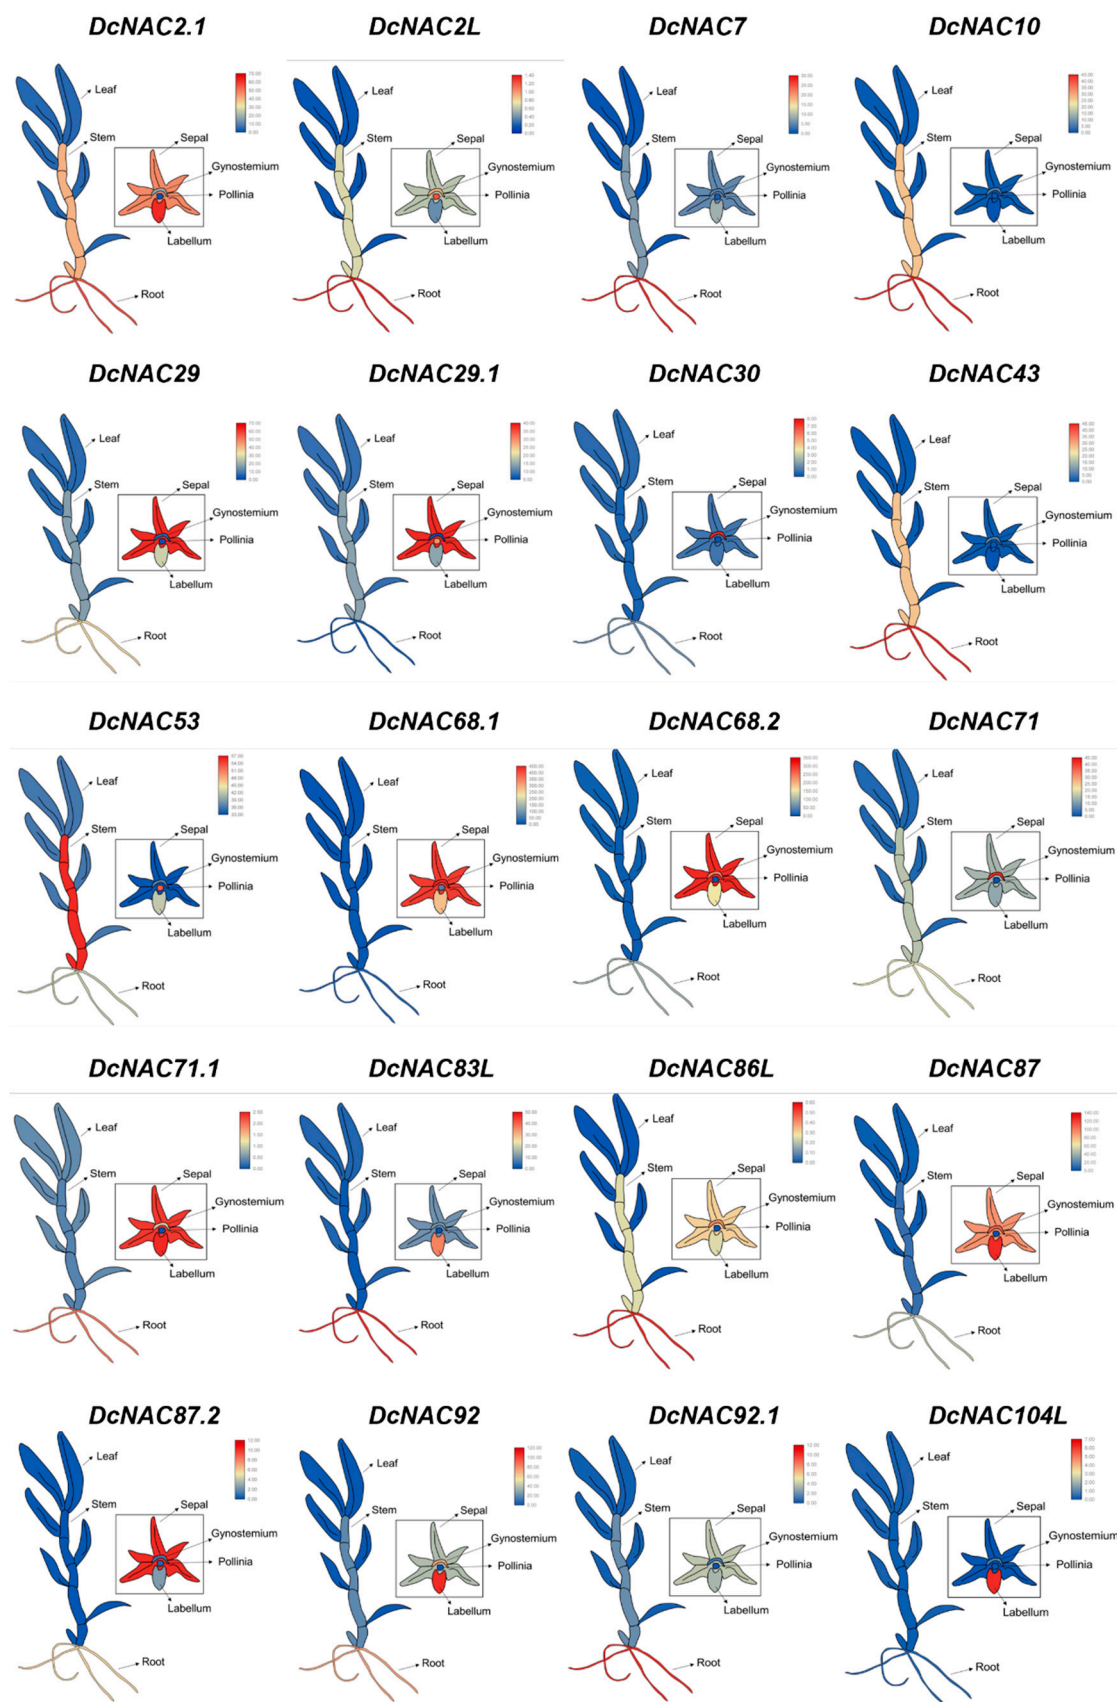

**Figure S1.** Tissue expression patterns of the rest 20 differentially expressed *DcNAC* in different tissues of RJ

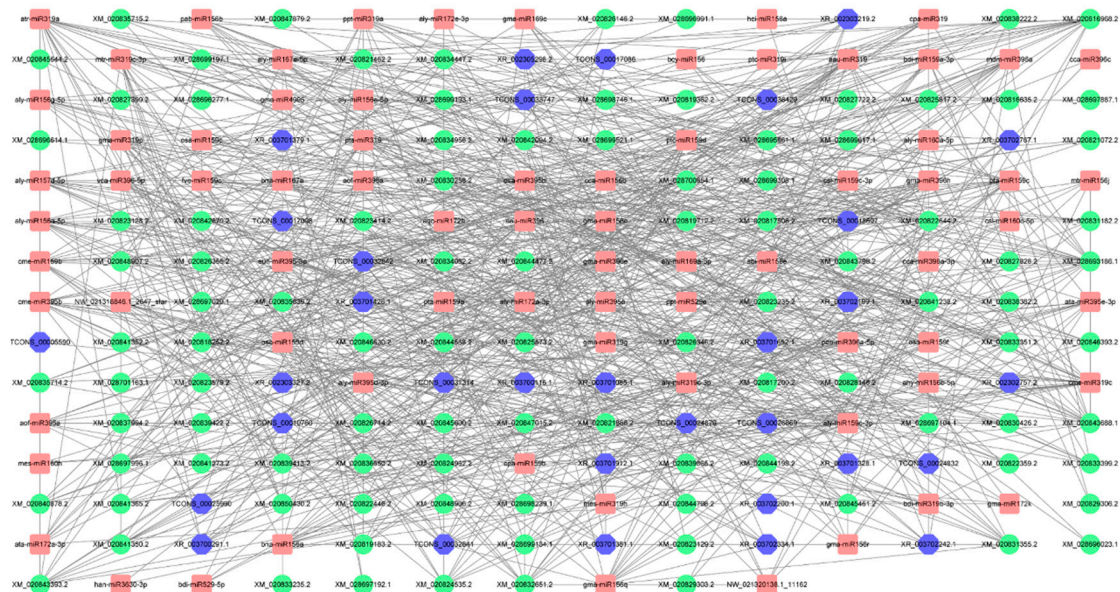

**Figure S2.** Drought stress response ceRNA network constructed with all DEmRNAs, DElncRNAs and DEMiRNAs. The color represents DEmRNAs (green color), DEMiRNAs (red color), and DElncRNAs (dark blue color)

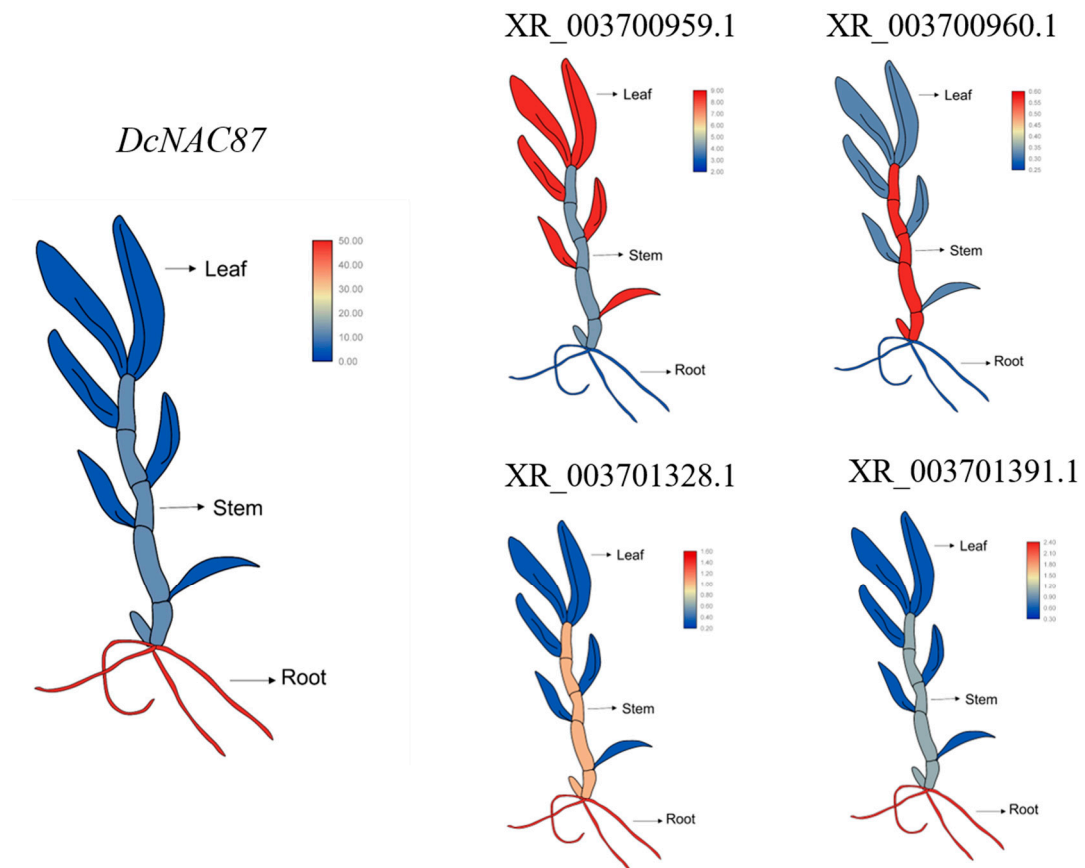

**Figure S3.** Tissue expression patterns of XR\_003701328.1, XR\_003700959.1, XR\_003700960.1 and XR\_003701391.1. in different tissues of RJ.
