# Supplementary material for: Whole-Transcriptome Sequencing Reveals the Global Molecular Responses and NAC Transcription Factors Involved in Drought Stress in Dendrobium catenatum
Source: Antioxidants (Basel). 2024 Jan 12;13(1):94. doi: 10.3390/antiox13010094 (PMC10812421; doi:10.3390/antiox13010094)
Supplement: Supplementary file 1 [file antioxidants-13-00094-s001.zip]

Archive with 8 entries (8 files):
- Supplementary Fig S1~3.pdf
- Table S1-mRNA list.xlsx
- Table S2-Basic information of DcNAC Gene family.xlsx
- Table S3-RT-qPCR primer list of DEDcNAC.xlsx
- Table S4-lncRNA list.xlsx
- Table S5-circRNA list.xlsx
- Table S6-small RNA list.xlsx
- Table S7-CeRNA data.xlsx
