# Supplementary material for: Whole-Transcriptome Sequencing Reveals the Global Molecular Responses and NAC Transcription Factors Involved in Drought Stress in Dendrobium catenatum
Source: Antioxidants (Basel). 2024 Jan 12;13(1):94. doi: 10.3390/antiox13010094 (PMC10812421; doi:10.3390/antiox13010094)
Supplement: Supplementary file 1 [file antioxidants-13-00094-s001.zip › Table S1-mRNA list.xlsx]

## Sheet: Sheet1
id	baseMean	baseMean_control_leaf_ck	baseMean_case_leaf_drought	foldChange	log2FoldChange	pval	padj	up_down	fpkm_leaf_ck1	fpkm_leaf_ck2	fpkm_leaf_ck3	fpkm_leaf_drought1	fpkm_leaf_drought2	fpkm_leaf_drought3	length	gene_id	gene	gene_product	GO_id	GO_term	pathway	pathway_description
XM_020816026.2	26.795	8.62421	44.9657	5.21389	2.38236	0.0282014	0.121919	Up	0.173389	0.146009	0.14614	0.513905	1.40477	0.717683	2209	110091781	LOC110091781	pentatricopeptide repeat-containing protein At1g61870, mitochondrial-like, transcript variant X1	-	-	-	-
XM_020816030.2	787.978	344.576	1231.38	3.57362	1.83738	0.00229739	0.0183493	Up	6.22035	5.41878	5.51522	22.4502	22.0756	22.2068	2397	110091784	LOC110091784	DELLA protein SLN1	-	-	path:dct04075	Plant hormone signal transduction
XM_020816034.2	4201.03	1921.58	6480.49	3.37248	1.75381	0.00260468	0.0202253	Up	44.2269	46.9439	45.5041	166.546	165.137	169.813	1679	110091788	LOC110091788	eukaryotic initiation factor 4A-3-like	GO:0005737,GO:0010494,GO:0005634,GO:0005524,GO:0003723,GO:0003724,GO:0003743,GO:0002183	cytoplasm|cytoplasmic stress granule|nucleus|ATP binding|RNA binding|RNA helicase activity|translation initiation factor activity|cytoplasmic translational initiation	path:dct03013	RNA transport
XM_020816047.2	1764.59	3485.93	43.2558	0.0124087	-6.3325	2.18892e-18	9.57e-16	Down	39.9233	39.647	41.1584	0.590254	0.479578	0.557101	3448	110091796	LOC110091796	cellulose synthase A catalytic subunit 9 [UDP-forming]	GO:0005794,GO:0016021,GO:0005886,GO:0005802,GO:0016760,GO:0016759,GO:0046872,GO:0071555,GO:0030244,GO:0009833,GO:0009834	Golgi apparatus|integral component of membrane|plasma membrane|trans-Golgi network|cellulose synthase (UDP-forming) activity|cellulose synthase activity|metal ion binding|cell wall organization|cellulose biosynthetic process|plant-type primary cell wall biogenesis|plant-type secondary cell wall biogenesis	-	-
XM_020816055.1	1221.4	1899.51	543.297	0.28602	-1.80581	0.00236588	0.0187523	Down	57.3608	57.1138	59.332	18.4001	20.1811	15.4902	1305	110091804	LOC110091804	translation initiation factor IF3-2, chloroplastic, transcript variant X1	GO:0009507,GO:0005773,GO:0043022,GO:0003743,GO:0009658,GO:0048366,GO:0032790	chloroplast|vacuole|ribosome binding|translation initiation factor activity|chloroplast organization|leaf development|ribosome disassembly	-	-
XM_020816061.2	507.047	277.646	736.447	2.65247	1.40734	0.0199086	0.0946991	Up	4.11214	4.42313	4.21704	12.502	12.2639	12.047	2599	110091807	LOC110091807	PHD finger protein At1g33420	GO:0005634,GO:0046872	nucleus|metal ion binding	-	-
XM_020816064.2	1117.6	358.955	1876.25	5.22697	2.38598	8.53047e-05	0.00126581	Up	8.03189	8.07763	8.11	45.3631	45.9291	46.4425	1770	110091815	LOC110091815	BAG-associated GRAM protein 1	GO:0016021,GO:0050832	integral component of membrane|defense response to fungus	-	-
XM_020816074.2	193.965	352.909	35.0202	0.0992331	-3.33304	2.32848e-06	5.93639e-05	Down	10.5257	10.9383	10.5471	1.12598	0.802429	1.55304	1318	110091826	LOC110091826	protein UPSTREAM OF FLC, transcript variant X4	GO:0009925	basal plasma membrane	-	-
XM_020816076.2	56.8826	6.89696	106.868	15.495	3.95373	2.1936e-05	0.000405479	Up	0.33105	0.172479	0.108739	2.59839	4.05194	3.6237	1353	110091828	LOC110091828	myb-related protein MYBAS2, transcript variant X2	GO:0005634,GO:0043565	nucleus|sequence-specific DNA binding	-	-
XM_020816081.2	728.99	397.569	1060.41	2.66723	1.41534	0.0171076	0.0843968	Up	8.56375	11.0983	10.0056	29.6406	25.9588	30.4702	1601	110091832	LOC110091832	probable sugar phosphate/phosphate translocator At3g17430	GO:0005768,GO:0005794,GO:0016021,GO:0005802,GO:0015297,GO:0022857,GO:0008643	endosome|Golgi apparatus|integral component of membrane|trans-Golgi network|antiporter activity|transmembrane transporter activity|carbohydrate transport	-	-
XM_020816082.2	362.941	608.765	117.116	0.192384	-2.37794	0.000192517	0.00248403	Down	19.3841	20.1526	19.4972	3.74569	4.13269	4.4862	1231	110091833	LOC110091833	uncharacterized LOC110091833	-	-	-	-
XM_020816092.2	12.9361	1.32269	24.5494	18.5602	4.21414	0.0107668	0.0600881	Up	0.0131413	0.0220199	0.0334183	0.464646	0.521033	0.465065	2199	110091841	LOC110091841	subtilisin-like protease SBT1.7	GO:0048046,GO:0009897,GO:0004252,GO:0042127,GO:0010103	apoplast|external side of plasma membrane|serine-type endopeptidase activity|regulation of cell population proliferation|stomatal complex morphogenesis	-	-
XM_020816094.2	7.25391	0	14.5078	Inf	Inf	0.0110381	0.0612446	Up	2.72159e-25	4.48577e-25	9.6867e-05	0.264336	0.374314	0.212375	2199	110091843	LOC110091843	subtilisin-like protease SBT1.7	GO:0048046,GO:0009897,GO:0004252,GO:0042127,GO:0010103	apoplast|external side of plasma membrane|serine-type endopeptidase activity|regulation of cell population proliferation|stomatal complex morphogenesis	-	-
XM_020816095.2	15.023	1.32269	28.7232	21.7157	4.44067	0.00460926	0.0315874	Up	0.0133779	0.0226002	0.0347708	0.573138	0.582517	0.525173	2199	110091844	LOC110091844	subtilisin-like protease SBT1.7	GO:0048046,GO:0009897,GO:0004252,GO:0042127,GO:0010103	apoplast|external side of plasma membrane|serine-type endopeptidase activity|regulation of cell population proliferation|stomatal complex morphogenesis	-	-
XM_020816104.2	18.032	31.4029	4.6611	0.148429	-2.75215	0.0303366	0.128312	Down	1.20009	1.18935	1.99915	0	0	0.721553	859	110091852	LOC110091852	glutaredoxin-C1	GO:0005623,GO:0005737,GO:0009055,GO:0015035,GO:0045454	cell|cytoplasm|electron transfer activity|protein disulfide oxidoreductase activity|cell redox homeostasis	-	-
XM_020816108.2	1853.99	550.322	3157.67	5.73786	2.52051	3.12681e-05	0.000544611	Up	9.04727	7.49645	8.17275	51.9529	50.0948	52.2515	2659	110091855	LOC110091855	protein LHY	GO:0005634,GO:0003700,GO:0044212,GO:0007623,GO:0048574,GO:0042754,GO:0043433,GO:0042752,GO:0006355,GO:0009737,GO:0009733,GO:0046686,GO:0009409,GO:0009723,GO:0009739,GO:0009753,GO:0009751,GO:0009651	nucleus|DNA-binding transcription factor activity|transcription regulatory region DNA binding|circadian rhythm|long-day photoperiodism, flowering|negative regulation of circadian rhythm|negative regulation of DNA-binding transcription factor activity|regulation of circadian rhythm|regulation of transcription, DNA-templated|response to abscisic acid|response to auxin|response to cadmium ion|respon…	path:dct04712	Circadian rhythm - plant
XM_020816111.2	11.9783	1.35409	22.6025	16.692	4.06108	0.0159751	0.0801466	Up	0.027304	0.0418329	0.0278753	0.511203	0.533157	0.501647	1896	110091858	LOC110091858	wiskott-Aldrich syndrome protein family member 2	-	-	-	-
XM_020816116.1	26.9343	53.2028	0.665872	0.0125157	-6.32011	8.52387e-06	0.000179567	Down	3.64681	3.65217	6.32332	0	0	0.145312	465	110091862	LOC110091862	putative glycine-rich cell wall structural protein 1	-	-	-	-
XM_020816120.2	203.141	404.998	1.28386	0.00317004	-8.30128	6.85088e-18	2.32214e-15	Down	23.6633	23.4997	26.4076	0.121083	0.041609	0.0433691	657	110091865	LOC110091865	probable WRKY transcription factor 43, transcript variant X2	GO:0005634,GO:0003700,GO:0043565,GO:0050832,GO:0009867	nucleus|DNA-binding transcription factor activity|sequence-specific DNA binding|defense response to fungus|jasmonic acid mediated signaling pathway	-	-
XM_020816122.2	8.03862	0	16.0772	Inf	Inf	0.00707274	0.043818	Up	1.64666e-13	3.33172e-10	1.01758e-08	0.655543	0.205805	2.23057	683	110091866	LOC110091866	uncharacterized LOC110091866, transcript variant X2	-	-	-	-
XM_020816125.2	46.4627	5.73799	87.1873	15.1948	3.9255	7.4176e-05	0.00112108	Up	0.489539	0.00704761	0.0377273	4.93864	1.44134	2.42916	1287	110091867	LOC110091867	UBP1-associated proteins 1C, transcript variant X3	GO:0005634,GO:1990904,GO:0003729,GO:0003723,GO:0008270,GO:0006397	nucleus|ribonucleoprotein complex|mRNA binding|RNA binding|zinc ion binding|mRNA processing	-	-
XM_020816147.2	57.1451	24.8284	89.4618	3.6032	1.84928	0.0247646	0.111073	Up	0.00722976	0.222903	0.194446	0.425034	0.412517	0.830699	6973	110091869	LOC110091869	uncharacterized LOC110091869, transcript variant X19	-	-	-	-
XM_020816149.2	1408.45	733.813	2083.09	2.83872	1.50524	0.0105449	0.0591937	Up	6.43766	5.44038	6.41327	19.1467	18.065	19.2722	4791	110091869	LOC110091869	uncharacterized LOC110091869, transcript variant X21	-	-	-	-
XM_020816151.2	152.655	52.2571	253.053	4.84247	2.27574	0.0010122	0.00957509	Up	1.03375	1.35154	0.796428	4.84038	6.53084	5.34159	1966	110091872	LOC110091872	transcription factor GAMYB, transcript variant X1	GO:0005634,GO:0003677,GO:0030154,GO:0009908,GO:0006355	nucleus|DNA binding|cell differentiation|flower development|regulation of transcription, DNA-templated	-	-
XM_020816154.2	37.9257	7.40598	68.4455	9.24192	3.20819	0.0015483	0.0134682	Up	0.171354	0.000598849	0.286394	2.23253	0.41238	2.0283	1900	110091872	LOC110091872	transcription factor GAMYB, transcript variant X2	GO:0005634,GO:0003677,GO:0030154,GO:0009908,GO:0006355	nucleus|DNA binding|cell differentiation|flower development|regulation of transcription, DNA-templated	-	-
XM_020816159.2	8.55165	16.7811	0.322236	0.0192024	-5.70257	0.0135582	0.0711943	Down	0.440375	0.264833	0.300278	0	0.0247139	0	2000	110091874	LOC110091874	probable protein S-acyltransferase 1, transcript variant X1	GO:0005783,GO:0005794,GO:0016021,GO:0005886,GO:0035618,GO:0030140,GO:0019706,GO:0018230,GO:0006612,GO:0048767	endoplasmic reticulum|Golgi apparatus|integral component of membrane|plasma membrane|root hair|trans-Golgi network transport vesicle|protein-cysteine S-palmitoyltransferase activity|peptidyl-L-cysteine S-palmitoylation|protein targeting to membrane|root hair elongation	-	-
XM_020816164.2	34.7835	64.9379	4.629	0.0712835	-3.81029	0.000350405	0.00403776	Down	2.64044	3.41242	0.980849	3.47002e-07	0.100301	0.423466	1103	110091878	LOC110091878	UDP-glycosyltransferase 83A1-like	GO:0043231,GO:0016758,GO:0008194	intracellular membrane-bounded organelle|transferase activity, transferring hexosyl groups|UDP-glycosyltransferase activity	-	-
XM_020816169.2	38.4378	69.8225	7.05306	0.101014	-3.30737	0.00097875	0.00931981	Down	0.358331	0.341148	0.473489	0.0552168	0.0446093	0.0225729	7102	110091883	LOC110091883	UDP-glycosyltransferase 83A1-like	GO:0043231,GO:0016758,GO:0008194	intracellular membrane-bounded organelle|transferase activity, transferring hexosyl groups|UDP-glycosyltransferase activity	-	-
XM_020816170.2	1489.27	704.368	2274.17	3.22867	1.69094	0.00398825	0.0281897	Up	9.73444	11.5712	10.7945	39.7281	36.0853	36.9518	2620	110091884	LOC110091884	histone-lysine N-methyltransferase, H3 lysine-9 specific SUVH1, transcript variant X1	GO:0000775,GO:0005634,GO:0031490,GO:0001228,GO:0018024,GO:0008270,GO:0040029	chromosome, centromeric region|nucleus|chromatin DNA binding|DNA-binding transcription activator activity, RNA polymerase II-specific|histone-lysine N-methyltransferase activity|zinc ion binding|regulation of gene expression, epigenetic	-	-
XM_020816180.2	60.6817	20.2809	101.083	4.98413	2.31734	0.00553201	0.0364535	Up	0.605739	0.616953	0.529517	3.16283	3.29477	3.15193	1368	110091889	LOC110091889	L-aminoadipate-semialdehyde dehydrogenase-phosphopantetheinyl transferase-like, transcript variant X5	GO:0008897,GO:0000287	holo-[acyl-carrier-protein] synthase activity|magnesium ion binding	-	-
XM_020816186.2	128.063	59.5482	196.578	3.30115	1.72297	0.015094	0.0767728	Up	2.12444	0.888696	1.55067	5.33364	5.15754	5.91439	1556	110091894	LOC110091894	L-2-hydroxyglutarate dehydrogenase, mitochondrial, transcript variant X1	GO:0005739,GO:0003973,GO:0047545,GO:0071949	mitochondrion|(S)-2-hydroxy-acid oxidase activity|2-hydroxyglutarate dehydrogenase activity|FAD binding	path:dct00650,path:dct01100	Butanoate metabolism|Metabolic pathways
XM_020816187.2	55.2562	99.7503	10.762	0.10789	-3.21237	0.000387963	0.00438012	Down	2.19122	3.88428	2.72998	0.918586	2.04091e-09	0.121268	1352	110091894	LOC110091894	L-2-hydroxyglutarate dehydrogenase, mitochondrial, transcript variant X2	GO:0005739,GO:0003973,GO:0047545,GO:0071949	mitochondrion|(S)-2-hydroxy-acid oxidase activity|2-hydroxyglutarate dehydrogenase activity|FAD binding	path:dct00650,path:dct01100	Butanoate metabolism|Metabolic pathways
XM_020816192.2	98.3664	46.4046	150.328	3.23951	1.69578	0.0200796	0.0953323	Up	0.70667	0.730538	0.942664	3.79882	2.95951	1.60005	2335	110091896	LOC110091896	uncharacterized LOC110091896, transcript variant X2	GO:0009507,GO:0009570,GO:0030785,GO:0016279,GO:0018026,GO:0018023	chloroplast|chloroplast stroma|[ribulose-bisphosphate carboxylase]-lysine N-methyltransferase activity|protein-lysine N-methyltransferase activity|peptidyl-lysine monomethylation|peptidyl-lysine trimethylation	-	-
XM_020816194.2	28.6949	47.2901	10.0997	0.213568	-2.22723	0.032363	0.134175	Down	2.52619	1.92362	2.00013	0.22084	0.555961	0.676105	879	110091897	LOC110091897	heat stress transcription factor B-4b-like	GO:0005634,GO:0003700,GO:0042802,GO:0000978,GO:0043565,GO:0034605,GO:0061408	nucleus|DNA-binding transcription factor activity|identical protein binding|RNA polymerase II proximal promoter sequence-specific DNA binding|sequence-specific DNA binding|cellular response to heat|positive regulation of transcription from RNA polymerase II promoter in response to heat stress	-	-
XM_020816202.2	375.509	143.538	607.481	4.2322	2.08141	0.000923874	0.00889709	Up	4.27346	4.71225	3.86709	20.4305	19.5516	19.1746	1334	110091876	LOC110091876	ninja-family protein 2	GO:0005634,GO:0045892,GO:0007165	nucleus|negative regulation of transcription, DNA-templated|signal transduction	-	-
XM_020816218.2	182.262	291.138	73.3857	0.252065	-1.98813	0.00300393	0.0226493	Down	4.42716	4.10008	4.89712	1.26643	1.03613	1.37667	2592	110091914	LOC110091914	peroxisomal fatty acid beta-oxidation multifunctional protein, transcript variant X1	GO:0005618,GO:0005874,GO:0005777,GO:0009506,GO:0018812,GO:0003857,GO:0008692,GO:0004165,GO:0004300,GO:0008017,GO:0003729,GO:0006635,GO:0009908,GO:0009695	cell wall|microtubule|peroxisome|plasmodesma|3-hydroxyacyl-CoA dehydratase activity|3-hydroxyacyl-CoA dehydrogenase activity|3-hydroxybutyryl-CoA epimerase activity|dodecenoyl-CoA delta-isomerase activity|enoyl-CoA hydratase activity|microtubule binding|mRNA binding|fatty acid beta-oxidation|flower development|jasmonic acid biosynthetic process	path:dct00071,path:dct00592,path:dct01100,path:dct01110,path:dct01212	Fatty acid degradation|alpha-Linolenic acid metabolism|Metabolic pathways|Biosynthesis of secondary metabolites|Fatty acid metabolism
XM_020816219.2	765.762	1459.01	72.5148	0.0497013	-4.33057	1.16817e-10	9.05915e-09	Down	22.0329	22.9661	24.4772	1.61059	1.37949	0.758391	2508	110091914	LOC110091914	peroxisomal fatty acid beta-oxidation multifunctional protein, transcript variant X2	GO:0005618,GO:0005874,GO:0005777,GO:0009506,GO:0018812,GO:0003857,GO:0008692,GO:0004165,GO:0004300,GO:0008017,GO:0003729,GO:0006635,GO:0009908,GO:0009695	cell wall|microtubule|peroxisome|plasmodesma|3-hydroxyacyl-CoA dehydratase activity|3-hydroxyacyl-CoA dehydrogenase activity|3-hydroxybutyryl-CoA epimerase activity|dodecenoyl-CoA delta-isomerase activity|enoyl-CoA hydratase activity|microtubule binding|mRNA binding|fatty acid beta-oxidation|flower development|jasmonic acid biosynthetic process	path:dct00071,path:dct00592,path:dct01100,path:dct01110,path:dct01212	Fatty acid degradation|alpha-Linolenic acid metabolism|Metabolic pathways|Biosynthesis of secondary metabolites|Fatty acid metabolism
XM_020816231.2	42.1148	17.6158	66.6138	3.78149	1.91895	0.0354157	0.143746	Up	0.594268	0.632204	0.607474	2.25679	2.64297	2.5968	1150	110091923	LOC110091923	uncharacterized LOC110091923	-	-	-	-
XM_020816239.2	3523.68	1195.56	5851.8	4.89459	2.29119	0.000114939	0.00162329	Up	107.591	121.197	114.465	588.518	588.349	651.014	416	110091932	LOC110091932	homeobox protein knotted-1-like LET12	GO:0005634,GO:0003677,GO:0006355	nucleus|DNA binding|regulation of transcription, DNA-templated	-	-
XM_020816251.2	1191.58	670.737	1712.42	2.55305	1.35222	0.0216874	0.100823	Up	10.617	9.33788	11.5456	28.5401	27.7143	31.2646	2542	110091941	LOC110091941	mitogen-activated protein kinase 10-like	GO:0005737,GO:0005634,GO:0005524,GO:0004707,GO:0035556,GO:0010468	cytoplasm|nucleus|ATP binding|MAP kinase activity|intracellular signal transduction|regulation of gene expression	-	-
XM_020816256.2	519.039	305.524	732.554	2.3977	1.26165	0.0366471	0.147312	Up	5.56151	5.37657	6.4905	15.122	15.7646	14.598	2092	110091944	LOC110091944	plant-specific TFIIB-related protein PTF2	GO:0005634,GO:0000126,GO:0003690,GO:0046872,GO:0042803,GO:0070063,GO:0001006,GO:0001093,GO:0008134,GO:0006352,GO:0009793,GO:0009846,GO:0006355,GO:0070898	nucleus|transcription factor TFIIIB complex|double-stranded DNA binding|metal ion binding|protein homodimerization activity|RNA polymerase binding|RNA polymerase III type 3 promoter sequence-specific DNA binding|TFIIB-class transcription factor binding|transcription factor binding|DNA-templated transcription, initiation|embryo development ending in seed dormancy|pollen germination|regulation of t…	-	-
XM_020816265.2	387.995	213.485	562.506	2.63488	1.39774	0.0230349	0.105319	Up	5.76705	5.82362	6.00057	16.9664	16.8332	16.6257	1449	110091950	LOC110091950	ribokinase	GO:0009507,GO:0042644,GO:0009570,GO:0005634,GO:0042646,GO:0005524,GO:0046872,GO:0004747,GO:0019303,GO:0009116	chloroplast|chloroplast nucleoid|chloroplast stroma|nucleus|plastid nucleoid|ATP binding|metal ion binding|ribokinase activity|D-ribose catabolic process|nucleoside metabolic process	path:dct00030,path:dct01100	Pentose phosphate pathway|Metabolic pathways
XM_020816272.2	985.759	1720.05	251.464	0.146196	-2.77403	7.38982e-06	0.000158443	Down	30.2183	31.0638	30.7904	4.9704	4.97456	4.71588	2231	110091957	LOC110091957	uncharacterized LOC110091957	GO:0005886,GO:0009738,GO:1900458	plasma membrane|abscisic acid-activated signaling pathway|negative regulation of brassinosteroid mediated signaling pathway	-	-
XM_020816273.2	1176.11	1993.39	358.826	0.180008	-2.47387	4.85051e-05	0.000783326	Down	27.8434	29.3457	28.0804	6.0937	5.08005	5.51953	2792	110091959	LOC110091959	probable galactinol--sucrose galactosyltransferase 2	GO:0009506,GO:0052692,GO:0016757,GO:0034484,GO:0080167,GO:0006979	plasmodesma|raffinose alpha-galactosidase activity|transferase activity, transferring glycosyl groups|raffinose catabolic process|response to karrikin|response to oxidative stress	-	-
XM_020816293.2	62.4838	123.082	1.88606	0.0153237	-6.02809	9.04878e-09	4.37459e-07	Down	2.24352	2.62005	2.67477	0.116507	0.000775669	0.000126707	1950	110091968	LOC110091968	BRCA1-associated RING domain protein 1, transcript variant X1	GO:0070531,GO:0031436,GO:0005634,GO:0005886,GO:0003677,GO:0004842,GO:0008270,GO:0071480,GO:0006310,GO:0006281,GO:0000724,GO:0045717,GO:0035067,GO:0071158,GO:0035066,GO:0045944,GO:0010332	BRCA1-A complex|BRCA1-BARD1 complex|nucleus|plasma membrane|DNA binding|ubiquitin-protein transferase activity|zinc ion binding|cellular response to gamma radiation|DNA recombination|DNA repair|double-strand break repair via homologous recombination|negative regulation of fatty acid biosynthetic process|negative regulation of histone acetylation|positive regulation of cell cycle arrest|positive r…	path:dct03440	Homologous recombination
XM_020816295.2	4465.64	7536.01	1395.27	0.185147	-2.43326	4.47234e-05	0.000734442	Down	401.228	372.678	402.546	84.0331	76.6596	76.2124	765	110091970	LOC110091970	disease resistance protein Pik-1-like	GO:0046872	metal ion binding	-	-
XM_020816297.2	3799.09	6666.53	931.644	0.13975	-2.83908	2.95874e-06	7.28028e-05	Down	329.512	347.258	328.442	52.3334	52.4342	48.06	792	110091972	LOC110091972	disease resistance protein Pik-1-like, transcript variant X1	GO:0043531,GO:0005524,GO:0009870,GO:0042742,GO:0009626	ADP binding|ATP binding|defense response signaling pathway, resistance gene-dependent|defense response to bacterium|plant-type hypersensitive response	-	-
XM_020816299.2	320.544	32.0605	609.027	18.9962	4.24764	1.69821e-09	9.85192e-08	Up	1.00999	0.683689	0.486404	15.5238	14.3722	15.1793	1755	110091969	LOC110091969	IAA-amino acid hydrolase ILR1-like 6	GO:0005783,GO:0016787,GO:0010179,GO:1990206,GO:0009850,GO:0009694,GO:0010112,GO:0009753	endoplasmic reticulum|hydrolase activity|IAA-Ala conjugate hydrolase activity|jasmonyl-Ile conjugate hydrolase activity|auxin metabolic process|jasmonic acid metabolic process|regulation of systemic acquired resistance|response to jasmonic acid	-	-
XM_020816303.2	767.026	349.266	1184.79	3.39222	1.76223	0.00341129	0.0250533	Up	13.2122	12.7818	15.3803	50.4986	51.1745	51.0448	1008	110091976	LOC110091976	ubiquitin domain-containing protein 2	-	-	-	-
XM_020816306.2	24639.1	13445.5	35832.7	2.66503	1.41415	0.0138225	0.0720926	Up	73.1513	70.3652	71.4153	204.684	211.013	207.463	7471	110091980	LOC110091980	pre-mRNA-processing-splicing factor 8A	GO:0071013,GO:0005739,GO:0005682,GO:0097157,GO:0000386,GO:0030619,GO:0030620,GO:0030623,GO:0017070,GO:0000380,GO:0000398,GO:0000244	catalytic step 2 spliceosome|mitochondrion|U5 snRNP|pre-mRNA intronic binding|second spliceosomal transesterification activity|U1 snRNA binding|U2 snRNA binding|U5 snRNA binding|U6 snRNA binding|alternative mRNA splicing, via spliceosome|mRNA splicing, via spliceosome|spliceosomal tri-snRNP complex assembly	-	-
XM_020816309.2	489.412	296.973	681.851	2.296	1.19913	0.0473161	0.176897	Up	4.46319	5.39208	6.0061	11.0549	13.4459	15.1066	2237	110091979	LOC110091979	putative clathrin assembly protein At5g35200, transcript variant X1	GO:0005905,GO:0030136,GO:0005794,GO:0005886,GO:0005545,GO:0032050,GO:0005546,GO:0000149,GO:0048268,GO:0072583,GO:0006897,GO:0006900	clathrin-coated pit|clathrin-coated vesicle|Golgi apparatus|plasma membrane|1-phosphatidylinositol binding|clathrin heavy chain binding|phosphatidylinositol-4,5-bisphosphate binding|SNARE binding|clathrin coat assembly|clathrin-dependent endocytosis|endocytosis|vesicle budding from membrane	-	-
XM_020816335.2	15.069	26.2712	3.86683	0.147189	-2.76426	0.0467796	0.175427	Down	0.673514	0.5543	1.67176	8.5222e-08	0.468149	0.000358132	1097	110092002	LOC110092002	exosome complex exonuclease RRP46 homolog, transcript variant X1	GO:0000177,GO:0000176,GO:0005730,GO:0005840,GO:0004536,GO:0003690,GO:0004527,GO:0042802,GO:0004540,GO:0003727,GO:0071028,GO:0034427,GO:0071051,GO:0016075,GO:0006364,GO:0034475	cytoplasmic exosome (RNase complex)|nuclear exosome (RNase complex)|nucleolus|ribosome|deoxyribonuclease activity|double-stranded DNA binding|exonuclease activity|identical protein binding|ribonuclease activity|single-stranded RNA binding|nuclear mRNA surveillance|nuclear-transcribed mRNA catabolic process, exonucleolytic, 3'-5'|polyadenylation-dependent snoRNA 3'-end processing|rRNA catabolic pr…	path:dct03018	RNA degradation
XM_020816349.2	7.33426	14.6685	0	0	#NAME?	0.0105149	0.0590583	Down	0.623971	3.42231	1.74366	1.53327e-24	5.33978e-14	4.27426e-20	300	110092007	LOC110092007	thiol protease SEN102-like	GO:0005788,GO:0008234	endoplasmic reticulum lumen|cysteine-type peptidase activity	-	-
XM_020816350.2	403.929	609.826	198.032	0.324735	-1.62266	0.00852571	0.05047	Down	28.4811	28.33	28.7013	9.09529	11.5851	9.53947	852	110092006	LOC110092006	rhodanese-like domain-containing protein 10	GO:0009507,GO:0009941,GO:0009534,GO:0016021,GO:0009409	chloroplast|chloroplast envelope|chloroplast thylakoid|integral component of membrane|response to cold	-	-
XM_020816356.2	790.39	1292.57	288.206	0.22297	-2.16508	0.000376698	0.00426892	Down	38.0301	42.4254	35.4209	8.51437	9.5687	10.0237	1332	110092018	LOC110092018	release factor glutamine methyltransferase-like	-	-	-	-
XM_020816358.2	666.224	1103.31	229.139	0.207683	-2.26755	0.000225159	0.00283007	Down	58.776	56.0798	53.6168	12.8687	13.2598	11.9527	782	110092019	LOC110092019	uncharacterized LOC110092019	-	-	-	-
XM_020816386.2	111.985	172.189	51.7804	0.300718	-1.73352	0.0152495	0.0773812	Down	11.3452	11.6891	13.408	3.26952	4.5082	4.12204	564	110092039	LOC110092039	uncharacterized LOC110092039	-	-	-	-
XM_020816401.2	2035.06	1123.67	2946.45	2.62217	1.39076	0.0168186	0.083339	Up	19.8904	19.1218	20.4963	56.8514	56.7811	56.1207	2255	110092054	LOC110092054	protein PLASTID MOVEMENT IMPAIRED 2	GO:0005623,GO:0005829,GO:0009904,GO:0009903,GO:0009637	cell|cytosol|chloroplast accumulation movement|chloroplast avoidance movement|response to blue light	-	-
XM_020816413.2	5.95935	0	11.9187	Inf	Inf	0.0245525	0.110384	Up	2.53032e-20	4.38924e-23	4.39882e-05	0.421482	0.846193	0.289649	986	110092058	LOC110092058	guanylate kinase 2, chloroplastic/mitochondrial, transcript variant X2	GO:0009507,GO:0005829,GO:0005739,GO:0005524,GO:0004385,GO:0048638	chloroplast|cytosol|mitochondrion|ATP binding|guanylate kinase activity|regulation of developmental growth	path:dct00230,path:dct01100	Purine metabolism|Metabolic pathways
XM_020816414.2	421.458	615.256	227.661	0.370026	-1.4343	0.0192889	0.0925542	Down	5.75481	6.14332	6.02928	2.43207	2.38738	2.39836	4097	110092059	LOC110092059	probable inactive receptor kinase At5g10020	-	-	-	-
XM_020816431.2	1489.39	782.856	2195.93	2.80502	1.48801	0.0112286	0.0619709	Up	20.7758	18.2963	20.3932	62.1476	59.97	59.3655	1572	110092074	LOC110092074	purple acid phosphatase 18	GO:0005576,GO:0003993,GO:0046872	extracellular region|acid phosphatase activity|metal ion binding	-	-
XM_020816433.2	639.217	352.103	926.33	2.63085	1.39553	0.0198943	0.094646	Up	7.50987	7.58264	8.23401	21.8506	22.177	22.7639	1802	110092075	LOC110092075	probable nucleoredoxin 2	GO:0005623,GO:0047134,GO:0045454	cell|protein-disulfide reductase activity|cell redox homeostasis	-	-
XM_020816443.2	92.2123	138.673	45.7514	0.329922	-1.5998	0.0307525	0.12957	Down	5.39492	4.86694	4.48173	1.98593	1.75979	1.54843	1125	110092083	LOC110092083	thiamine pyrophosphokinase 3-like, transcript variant X2	GO:0005829,GO:0005524,GO:0016301,GO:0030975,GO:0004788,GO:0009229,GO:0006772	cytosol|ATP binding|kinase activity|thiamine binding|thiamine diphosphokinase activity|thiamine diphosphate biosynthetic process|thiamine metabolic process	path:dct00730,path:dct01100	Thiamine metabolism|Metabolic pathways
XM_020816452.2	109.892	162.481	57.3033	0.352677	-1.50358	0.0366172	0.147304	Down	4.32821	8.07431	6.26854	2.40076	1.85586	2.92142	1039	110092084	LOC110092084	E3 ubiquitin-protein ligase UPL4, transcript variant X2	-	-	-	-
XM_020816454.2	919.824	1288.86	550.79	0.427348	-1.22652	0.0372268	0.148897	Down	14.6317	13.9039	13.6431	6.57369	7.05086	5.98013	3650	110092085	LOC110092085	A-kinase anchor protein 9	-	-	-	-
XM_020816477.2	7.57739	0.648557	14.5062	22.3669	4.4833	0.0445014	0.169355	Up	2.15811e-11	5.32187e-07	0.0525784	0.0645942	1.13947	0.0600942	1506	110092097	LOC110092097	F-box protein At5g52880, transcript variant X1	-	-	-	-
XM_020816485.2	2322.63	3432.15	1213.11	0.353456	-1.5004	0.00987899	0.0565717	Down	131.559	125.165	126.376	50.7642	48.4868	48.0577	1070	110092102	LOC110092102	photosynthetic NDH subunit of lumenal location 5, chloroplastic	GO:0009507,GO:0009533,GO:0009534,GO:0009535,GO:0009536,GO:0009579,GO:0031977,GO:0016018,GO:0003755,GO:0043424,GO:0051082,GO:0010275,GO:0042026	chloroplast|chloroplast stromal thylakoid|chloroplast thylakoid|chloroplast thylakoid membrane|plastid|thylakoid|thylakoid lumen|cyclosporin A binding|peptidyl-prolyl cis-trans isomerase activity|protein histidine kinase binding|unfolded protein binding|NAD(P)H dehydrogenase complex assembly|protein refolding	-	-
XM_020816487.2	3010.71	1548.35	4473.07	2.88892	1.53053	0.00840257	0.0499961	Up	43.4882	42.9111	43.9005	137.832	137.267	134.451	1419	110092103	LOC110092103	uncharacterized LOC110092103	-	-	-	-
XM_020816490.2	49.2946	77.9228	20.6663	0.265215	-1.91477	0.0280342	0.121301	Down	2.76481	3.4241	3.42764	0.967878	0.867132	0.92201	969	110092104	LOC110092104	extensin-2	-	-	-	-
XM_020816493.2	24.8461	48.4347	1.25737	0.0259602	-5.26756	9.30513e-05	0.00136398	Down	4.26827	2.60079	2.6477	0.283365	8.64628e-16	1.31237e-06	607	110092106	LOC110092106	uncharacterized LOC110092106	-	-	-	-
XM_020816508.2	2482.7	970.667	3994.73	4.11545	2.04105	0.00055255	0.00586103	Up	24.9061	26.1287	25.6665	112.786	116.195	114.51	1511	110092119	LOC110092119	heavy metal-associated isoprenylated plant protein 32	GO:0005618,GO:0046872,GO:0030001	cell wall|metal ion binding|metal ion transport	-	-
XM_020816517.2	72.4048	0.955361	143.854	150.576	7.23435	8.33398e-11	6.66873e-09	Up	0.0305233	5.43405e-07	0.000410844	1.70209	1.43451	2.26002	3461	110092125	LOC110092125	mediator of RNA polymerase II transcription subunit 33A, transcript variant X2	GO:0016592,GO:0009698,GO:2000762	mediator complex|phenylpropanoid metabolic process|regulation of phenylpropanoid metabolic process	-	-
XM_020816518.2	78.7237	145.531	11.9164	0.0818824	-3.6103	1.64228e-05	0.000318398	Down	3.18972	3.32965	3.27232	0.296798	0.343348	0.207965	1778	110092126	LOC110092126	uncharacterized LOC110092126	-	-	-	-
XM_020816519.2	245.193	351.992	138.393	0.39317	-1.34678	0.0337994	0.138765	Down	9.47599	8.61489	8.01051	3.24924	3.36823	4.54524	1610	110092127	LOC110092127	cathepsin B-like protease 2	GO:0005576,GO:0005615,GO:0005764,GO:0005773,GO:0004197,GO:0006952,GO:0051603,GO:0050790	extracellular region|extracellular space|lysosome|vacuole|cysteine-type endopeptidase activity|defense response|proteolysis involved in cellular protein catabolic process|regulation of catalytic activity	-	-
XM_020816534.2	21.5405	0.674135	42.4069	62.9057	5.97512	8.5972e-05	0.00127383	Up	0.00783281	0.0123926	0.00713645	0.324768	0.76723	1.06242	2568	110092136	LOC110092136	probable E3 ubiquitin-protein ligase HIP1, transcript variant X1	GO:0046872,GO:0061630,GO:0040008	metal ion binding|ubiquitin protein ligase activity|regulation of growth	-	-
XM_020816536.2	91.5536	26.6126	156.495	5.88046	2.55593	0.000765496	0.00766106	Up	0.000268768	0.695041	0.542265	2.70635	1.71374	3.46699	2579	110092136	LOC110092136	probable E3 ubiquitin-protein ligase HIP1, transcript variant X3	GO:0046872,GO:0061630,GO:0040008	metal ion binding|ubiquitin protein ligase activity|regulation of growth	-	-
XM_020816537.2	66.7445	14.1254	119.364	8.45026	3.079	0.000259007	0.00316847	Up	0.318772	0.334407	0.0182144	2.0463	1.6584	2.33786	2563	110092136	LOC110092136	probable E3 ubiquitin-protein ligase HIP1, transcript variant X4	GO:0046872,GO:0061630,GO:0040008	metal ion binding|ubiquitin protein ligase activity|regulation of growth	-	-
XM_020816538.2	1833.57	932.17	2734.97	2.93399	1.55286	0.00777612	0.0471702	Up	13.9338	14.9431	14.5229	49.3749	44.9984	44.1473	2565	110092136	LOC110092136	probable E3 ubiquitin-protein ligase HIP1, transcript variant X6	GO:0046872,GO:0061630,GO:0009908,GO:0043161,GO:0040008,GO:0010228	metal ion binding|ubiquitin protein ligase activity|flower development|proteasome-mediated ubiquitin-dependent protein catabolic process|regulation of growth|vegetative to reproductive phase transition of meristem	-	-
XM_020816539.2	259.872	137.826	381.917	2.77101	1.47041	0.0207226	0.0974193	Up	1.67188	1.55489	1.31778	4.60777	4.66205	4.42297	3624	110092138	LOC110092138	pentatricopeptide repeat-containing protein At2g41720, transcript variant X1	-	-	-	-
XM_020816543.2	864.356	1498.96	229.753	0.153275	-2.7058	1.23925e-05	0.000248401	Down	53.2544	55.4567	52.5731	8.15866	8.84324	9.91347	1110	110092140	LOC110092140	50S ribosomal protein L3, chloroplastic	GO:0009507,GO:0009941,GO:0009570,GO:0005829,GO:0022625,GO:0019843,GO:0003735,GO:0006412	chloroplast|chloroplast envelope|chloroplast stroma|cytosol|cytosolic large ribosomal subunit|rRNA binding|structural constituent of ribosome|translation	path:dct03010	Ribosome
XM_020816549.2	760.88	1143.42	378.344	0.330889	-1.59558	0.0075415	0.0460535	Down	38.6661	37.13	39.0448	13.6896	13.46	14.1854	1189	110092144	LOC110092144	protein LUTEIN DEFICIENT 5, chloroplastic-like	GO:0009507,GO:0009941,GO:0010291,GO:0020037,GO:0005506,GO:0016705,GO:0016117,GO:0016123	chloroplast|chloroplast envelope|carotene beta-ring hydroxylase activity|heme binding|iron ion binding|oxidoreductase activity, acting on paired donors, with incorporation or reduction of molecular oxygen|carotenoid biosynthetic process|xanthophyll biosynthetic process	-	-
XM_020816551.2	364.962	215.143	514.782	2.39274	1.25866	0.0409953	0.159554	Up	6.45298	6.61562	6.90343	17.0563	16.9242	18.0196	1286	110092145	LOC110092145	ubiquitin-conjugating enzyme E2 27	GO:0005634,GO:0005524,GO:0061631	nucleus|ATP binding|ubiquitin conjugating enzyme activity	path:dct04120	Ubiquitin mediated proteolysis
XM_020816554.2	1157.94	460.803	1855.08	4.02576	2.00926	0.000761438	0.00763133	Up	3.40014	4.13533	3.78653	17.1899	15.9501	16.4444	4861	110092146	LOC110092146	phytochrome A1	GO:0005634,GO:0000155,GO:0009881,GO:0042803,GO:0009584,GO:0018298,GO:0017006,GO:0009585,GO:0006355	nucleus|phosphorelay sensor kinase activity|photoreceptor activity|protein homodimerization activity|detection of visible light|protein-chromophore linkage|protein-tetrapyrrole linkage|red, far-red light phototransduction|regulation of transcription, DNA-templated	path:dct04712	Circadian rhythm - plant
XM_020816564.2	14326.6	19721.8	8931.39	0.452868	-1.14284	0.0451597	0.171112	Down	537.186	539.93	539.397	261.418	264.147	270.897	1457	110092151	LOC110092151	cathepsin B-like protease 2, transcript variant X2	GO:0005576,GO:0005615,GO:0005764,GO:0005773,GO:0004197,GO:0006952,GO:0051603,GO:0050790	extracellular region|extracellular space|lysosome|vacuole|cysteine-type endopeptidase activity|defense response|proteolysis involved in cellular protein catabolic process|regulation of catalytic activity	-	-
XM_020816569.2	237.206	0	474.412	Inf	Inf	5.10409e-22	4.52868e-19	Up	3.83978e-46	5.84376e-55	1.5787e-38	8.66978	10.1887	9.35331	2184	110092155	LOC110092155	uncharacterized protein At2g33490-like, transcript variant X2	GO:0005886	plasma membrane	-	-
XM_020816572.2	1275.19	1933.18	617.191	0.319262	-1.64719	0.00531695	0.0353202	Down	42.9152	43.5531	39.8894	14.8282	15.7344	13.3128	1827	110092156	LOC110092156	dihydrolipoyllysine-residue succinyltransferase component of 2-oxoglutarate dehydrogenase complex 1, mitochondrial, transcript variant X2	GO:0005829,GO:0005739,GO:0045252,GO:0004149,GO:0008270,GO:0033512,GO:0006099	cytosol|mitochondrion|oxoglutarate dehydrogenase complex|dihydrolipoyllysine-residue succinyltransferase activity|zinc ion binding|L-lysine catabolic process to acetyl-CoA via saccharopine|tricarboxylic acid cycle	path:dct00020,path:dct00310,path:dct00380,path:dct01100,path:dct01110,path:dct01200	Citrate cycle (TCA cycle)|Lysine degradation|Tryptophan metabolism|Metabolic pathways|Biosynthesis of secondary metabolites|Carbon metabolism
XM_020816576.2	1578.15	402.567	2753.74	6.84044	2.77409	5.43727e-06	0.000122225	Up	26.251	34.2497	26.2518	225.7	224.334	195.644	554	110092160	LOC110092160	uncharacterized LOC110092160	-	-	-	-
XM_020816581.2	230.104	334.941	125.268	0.374001	-1.41889	0.027113	0.118667	Down	16.0614	15.4611	16.8511	6.82751	6.30033	6.53727	827	110092166	LOC110092166	protein LUTEIN DEFICIENT 5, chloroplastic-like	GO:0009507,GO:0009941,GO:0010291,GO:0020037,GO:0005506,GO:0016705,GO:0016117,GO:0016123	chloroplast|chloroplast envelope|carotene beta-ring hydroxylase activity|heme binding|iron ion binding|oxidoreductase activity, acting on paired donors, with incorporation or reduction of molecular oxygen|carotenoid biosynthetic process|xanthophyll biosynthetic process	-	-
XM_020816583.2	23.8363	47.6726	0	0	#NAME?	1.84025e-06	4.86973e-05	Down	2.37409	2.19721	2.82118	0	0	0	770	110092165	LOC110092165	late embryogenesis abundant protein At1g64065-like	GO:0016021,GO:0005886	integral component of membrane|plasma membrane	-	-
XM_020816603.2	60.1649	28.1525	92.1773	3.27422	1.71115	0.0408747	0.159208	Up	1.7662	0.288014	1.18219	3.27108	4.41088	3.8759	1037	110092157	LOC110092157	uncharacterized LOC110092157, transcript variant X1	-	-	-	-
XM_020816608.2	20.3317	0	40.6635	Inf	Inf	1.08617e-05	0.000221694	Up	1.38549e-05	1.54027e-17	0.000214223	0.0113735	3.88566	4.57787	629	110092184	LOC110092184	uncharacterized LOC110092184, transcript variant X1	-	-	-	-
XM_020816611.2	222.103	102.915	341.291	3.31625	1.72955	0.00973443	0.0559243	Up	2.90919	0.190006	0.100752	4.19955	3.6312	3.68045	3853	110092187	LOC110092187	telomerase reverse transcriptase, transcript variant X1	GO:0000781,GO:0000333,GO:0046872,GO:0070034,GO:0003721,GO:0042162,GO:0007004	chromosome, telomeric region|telomerase catalytic core complex|metal ion binding|telomerase RNA binding|telomerase RNA reverse transcriptase activity|telomeric DNA binding|telomere maintenance via telomerase	-	-
XM_020816625.2	45.4025	14.3407	76.4644	5.33199	2.41467	0.00705227	0.043703	Up	0.219306	0.553461	0.12625	1.84146	1.67175	1.63283	1927	110092190	LOC110092190	DNA-(apurinic or apyrimidinic site) lyase, chloroplastic, transcript variant X2	GO:0042644,GO:0005634,GO:0008408,GO:0140078,GO:0003677,GO:0003906,GO:0008311,GO:0004519,GO:0046872,GO:0016791,GO:0004528,GO:0006284,GO:0033683,GO:0045893	chloroplast nucleoid|nucleus|3'-5' exonuclease activity|class I DNA-(apurinic or apyrimidinic site) endonuclease activity|DNA binding|DNA-(apurinic or apyrimidinic site) endonuclease activity|double-stranded DNA 3'-5' exodeoxyribonuclease activity|endonuclease activity|metal ion binding|phosphatase activity|phosphodiesterase I activity|base-excision repair|nucleotide-excision repair, DNA incision…	path:dct03410	Base excision repair
XM_020816628.2	76.4242	123.749	29.0997	0.235151	-2.08834	0.00684197	0.0427245	Down	3.34109	1.06068	3.27364	0.335305	1.15599	0.477209	1926	110092190	LOC110092190	DNA-(apurinic or apyrimidinic site) lyase, chloroplastic, transcript variant X4	GO:0042644,GO:0005634,GO:0008408,GO:0140078,GO:0003677,GO:0003906,GO:0008311,GO:0004519,GO:0046872,GO:0016791,GO:0004528,GO:0006284,GO:0033683,GO:0045893	chloroplast nucleoid|nucleus|3'-5' exonuclease activity|class I DNA-(apurinic or apyrimidinic site) endonuclease activity|DNA binding|DNA-(apurinic or apyrimidinic site) endonuclease activity|double-stranded DNA 3'-5' exodeoxyribonuclease activity|endonuclease activity|metal ion binding|phosphatase activity|phosphodiesterase I activity|base-excision repair|nucleotide-excision repair, DNA incision…	path:dct03410	Base excision repair
XM_020816629.2	54.8345	94.127	15.5421	0.165118	-2.59843	0.00248513	0.0195079	Down	2.56941	0.829634	2.48373	0.393246	0.171043	0.484951	1919	110092190	LOC110092190	DNA-(apurinic or apyrimidinic site) lyase, chloroplastic, transcript variant X5	GO:0042644,GO:0005634,GO:0008408,GO:0140078,GO:0003677,GO:0003906,GO:0008311,GO:0004519,GO:0046872,GO:0016791,GO:0004528,GO:0006284,GO:0033683,GO:0045893	chloroplast nucleoid|nucleus|3'-5' exonuclease activity|class I DNA-(apurinic or apyrimidinic site) endonuclease activity|DNA binding|DNA-(apurinic or apyrimidinic site) endonuclease activity|double-stranded DNA 3'-5' exodeoxyribonuclease activity|endonuclease activity|metal ion binding|phosphatase activity|phosphodiesterase I activity|base-excision repair|nucleotide-excision repair, DNA incision…	path:dct03410	Base excision repair
XM_020816633.2	843.61	519.011	1168.21	2.25084	1.17046	0.0475732	0.177572	Up	11.1988	10.4414	11.6263	26.7757	27.7535	26.8944	1864	110092193	LOC110092193	pheophytinase, chloroplastic	GO:0009507,GO:0009570,GO:0009535,GO:0080124,GO:0015996	chloroplast|chloroplast stroma|chloroplast thylakoid membrane|pheophytinase activity|chlorophyll catabolic process	-	-
XM_020816635.2	310.424	567.133	53.7149	0.0947131	-3.40029	5.33068e-07	1.63758e-05	Down	4.04252	4.12113	4.23546	0.556093	0.592586	0.127384	5460	110092194	LOC110092194	transcription elongation factor SPT6 homolog, transcript variant X2	GO:0005829,GO:0009506,GO:0008023,GO:0035327,GO:0042393,GO:0031491,GO:0003746,GO:0070827,GO:0009793,GO:0042789,GO:0034728,GO:0032968,GO:0050684,GO:0006368	cytosol|plasmodesma|transcription elongation factor complex|transcriptionally active chromatin|histone binding|nucleosome binding|translation elongation factor activity|chromatin maintenance|embryo development ending in seed dormancy|mRNA transcription by RNA polymerase II|nucleosome organization|positive regulation of transcription elongation from RNA polymerase II promoter|regulation of mRNA pr…	-	-
XM_020816637.2	375.399	595.972	154.825	0.259786	-1.9446	0.00189759	0.0158528	Down	13.1311	12.9241	12.6297	3.73584	3.20967	3.99321	1840	110092196	LOC110092196	uncharacterized LOC110092196	-	-	-	-
XM_020816639.2	1260.61	2336.24	184.975	0.0791763	-3.65879	1.09917e-08	5.22185e-07	Down	119.625	128.748	124.559	11.2214	12.0518	8.88153	748	110092198	LOC110092198	50S ribosomal protein 5, chloroplastic	-	-	-	-
XM_020816653.2	50.3361	82.0469	18.6253	0.227008	-2.13918	0.0137524	0.0718514	Down	2.82219	1.6679	3.52843	0.620355	1.06362	0.287813	1222	110092211	LOC110092211	chloroplastic group IIB intron splicing facilitator CRS2, chloroplastic, transcript variant X1	GO:0009570,GO:0004045,GO:0006397,GO:0008380	chloroplast stroma|aminoacyl-tRNA hydrolase activity|mRNA processing|RNA splicing	-	-
XM_020816654.2	415.331	638.432	192.23	0.301098	-1.7317	0.00504472	0.0339773	Down	21.4251	21.9754	20.4091	6.46915	6.55251	7.86878	1195	110092211	LOC110092211	chloroplastic group IIB intron splicing facilitator CRS2, chloroplastic, transcript variant X2	GO:0009570,GO:0004045,GO:0006397,GO:0008380	chloroplast stroma|aminoacyl-tRNA hydrolase activity|mRNA processing|RNA splicing	-	-
XM_020816659.2	455.496	716.843	194.149	0.270839	-1.88449	0.00273714	0.0210105	Down	4.41138	14.0999	3.96493	1.70083	2.04193	2.88063	3809	110092213	LOC110092213	putative transcription elongation factor SPT5 homolog 1, transcript variant X2	GO:0032044,GO:0005840,GO:0003729,GO:0003735,GO:0032784,GO:0006357,GO:0006368,GO:0006412	DSIF complex|ribosome|mRNA binding|structural constituent of ribosome|regulation of DNA-templated transcription, elongation|regulation of transcription by RNA polymerase II|transcription elongation from RNA polymerase II promoter|translation	-	-
XM_020816671.2	269.205	388.031	150.379	0.387544	-1.36757	0.0301544	0.127852	Down	5.49815	4.4565	4.3143	2.06308	2.04397	1.88936	3250	110092216	LOC110092216	inactive protein kinase SELMODRAFT_444075, transcript variant X2	-	-	-	-
XM_020816678.2	390.324	563.703	216.945	0.384857	-1.37761	0.0248419	0.111254	Down	18.1355	18.6785	18.6441	7.39543	7.63094	8.20852	1214	110092221	LOC110092221	fruit protein pKIWI502	GO:0016491	oxidoreductase activity	-	-
XM_020816683.2	5.79985	11.5997	0	0	#NAME?	0.0261613	0.11555	Down	0.249583	0.254541	0.314119	0.00166887	3.165e-06	0.00432576	1712	110092223	LOC110092223	PI-PLC X domain-containing protein At5g67130, transcript variant X1	GO:0046658,GO:0005886,GO:0009536,GO:0008081,GO:0006629	anchored component of plasma membrane|plasma membrane|plastid|phosphoric diester hydrolase activity|lipid metabolic process	-	-
XM_020816692.2	2829.93	4497.17	1162.7	0.258541	-1.95154	0.00090267	0.00872783	Down	59.2696	57.4054	59.8242	16.3685	16.4592	16.822	3043	110092232	LOC110092232	pentatricopeptide repeat-containing protein At2g31400, chloroplastic	-	-	-	-
XM_020816706.2	152.294	82.0583	222.529	2.71184	1.43927	0.032076	0.133426	Up	2.16544	2.60733	2.03213	7.48331	7.13405	5.47834	1439	110092243	LOC110092243	G patch domain-containing protein 8, transcript variant X5	GO:0071008,GO:0003677,GO:0000390	U2-type post-mRNA release spliceosomal complex|DNA binding|spliceosomal complex disassembly	-	-
XM_020816709.2	47.0764	83.4774	10.6754	0.127883	-2.9671	0.00131971	0.0118523	Down	0.798161	0.919259	0.940789	0.12251	0.10952	0.140444	3751	110092245	LOC110092245	receptor-like kinase TMK4	GO:0016021,GO:0009505,GO:0005886,GO:0009506,GO:0005524,GO:0004675,GO:0009555,GO:0006468	integral component of membrane|plant-type cell wall|plasma membrane|plasmodesma|ATP binding|transmembrane receptor protein serine/threonine kinase activity|pollen development|protein phosphorylation	-	-
XM_020816721.2	55.689	25.726	85.652	3.32939	1.73526	0.0396978	0.155892	Up	0.856804	0.508444	0.414664	1.64994	2.12497	2.6622	1725	110092253	LOC110092253	calmodulin-binding transcription activator 3, transcript variant X1	GO:0005634,GO:0005516,GO:0043565,GO:0045944,GO:0045893,GO:0009733,GO:0050826,GO:0009414	nucleus|calmodulin binding|sequence-specific DNA binding|positive regulation of transcription by RNA polymerase II|positive regulation of transcription, DNA-templated|response to auxin|response to freezing|response to water deprivation	-	-
XM_020816734.2	123.536	68.1276	178.944	2.6266	1.3932	0.0466694	0.175109	Up	1.16518	0.887609	0.879417	2.68285	2.99633	2.72541	2767	110092252	LOC110092252	NAC domain-containing protein 75, transcript variant X2	GO:0005634,GO:0003700,GO:0043565,GO:0044212,GO:0071555,GO:0007275,GO:0045893,GO:1905177	nucleus|DNA-binding transcription factor activity|sequence-specific DNA binding|transcription regulatory region DNA binding|cell wall organization|multicellular organism development|positive regulation of transcription, DNA-templated|tracheary element differentiation	-	-
XM_020816737.2	83.627	3.06387	164.19	53.5891	5.74387	1.2988e-09	7.77139e-08	Up	0.109377	0.237879	0.111384	8.21545	10.0839	7.25631	835	110092259	LOC110092259	heavy metal-associated isoprenylated plant protein 23	GO:0016020,GO:0046872,GO:0055073,GO:0071585,GO:0030001	membrane|metal ion binding|cadmium ion homeostasis|detoxification of cadmium ion|metal ion transport	-	-
XM_020816754.2	43.5524	73.8431	13.2617	0.179593	-2.4772	0.00729146	0.0448809	Down	2.98098	3.40875	3.45134	0.651438	0.547428	0.725685	897	110092270	LOC110092270	uncharacterized LOC110092270	-	-	-	-
XM_020816764.2	237.608	430.103	45.1143	0.104892	-3.25302	2.28967e-06	5.87352e-05	Down	6.9943	6.91819	7.22404	0.838484	0.916608	0.669061	2429	110092278	LOC110092278	probable inactive receptor kinase At2g26730	-	-	-	-
XM_020816765.2	422.247	674.044	170.451	0.252878	-1.98348	0.00144149	0.0126964	Down	8.68496	8.50222	8.69159	2.39189	2.4391	2.28247	3111	110092280	LOC110092280	TPR repeat-containing thioredoxin TTL1	GO:0005623,GO:0009738,GO:0045454,GO:0009789,GO:0009737,GO:0006970,GO:0009651	cell|abscisic acid-activated signaling pathway|cell redox homeostasis|positive regulation of abscisic acid-activated signaling pathway|response to abscisic acid|response to osmotic stress|response to salt stress	-	-
XM_020816766.2	122.25	193.734	50.7658	0.262039	-1.93215	0.00649832	0.0410544	Down	4.15365	4.41906	4.43993	1.08211	1.38092	1.23092	1781	110092281	LOC110092281	uncharacterized protein YNL011C, transcript variant X1	-	-	-	-
XM_020816773.2	522.589	929.231	115.947	0.124777	-3.00258	2.99981e-06	7.34539e-05	Down	7.68809	10.8164	10.1285	1.94692	0.478596	1.47082	3875	110092287	LOC110092287	calcium-transporting ATPase 1, endoplasmic reticulum-type-like, transcript variant X2	GO:0005623,GO:0005783,GO:0005789,GO:0005576,GO:0030176,GO:0005886,GO:0005774,GO:0005524,GO:0005388,GO:0046872,GO:0008553,GO:0070588,GO:0006816,GO:0006874,GO:0046686,GO:0010042	cell|endoplasmic reticulum|endoplasmic reticulum membrane|extracellular region|integral component of endoplasmic reticulum membrane|plasma membrane|vacuolar membrane|ATP binding|calcium transmembrane transporter activity, phosphorylative mechanism|metal ion binding|proton-exporting ATPase activity, phosphorylative mechanism|calcium ion transmembrane transport|calcium ion transport|cellular calciu…	-	-
XM_020816784.2	40.9095	17.3844	64.4346	3.70646	1.89004	0.039208	0.154491	Up	0.665976	0.577084	0.0185627	1.88559	0.97331	2.26125	1635	110092290	LOC110092290	ribulose-1,5 bisphosphate carboxylase/oxygenase large subunit N-methyltransferase, chloroplastic, transcript variant X4	GO:0009507,GO:0030785,GO:0016279,GO:0018026	chloroplast|[ribulose-bisphosphate carboxylase]-lysine N-methyltransferase activity|protein-lysine N-methyltransferase activity|peptidyl-lysine monomethylation	-	-
XM_020816790.2	453.484	648.131	258.837	0.399359	-1.32424	0.0291016	0.124862	Down	32.1652	30.5408	31.6036	13.4053	13.4722	14.0908	821	110092295	LOC110092295	uncharacterized LOC110092295	-	-	-	-
XM_020816801.2	265.491	142.189	388.793	2.73434	1.45119	0.0227002	0.10412	Up	2.16617	1.87673	2.48647	6.61161	6.34929	6.4854	2597	110092303	LOC110092303	putative pentatricopeptide repeat-containing protein At1g68930, transcript variant X1	-	-	-	-
XM_020816806.2	147.659	0	295.318	Inf	Inf	2.44044e-18	1.05172e-15	Up	0.00786789	0	0	5.34793	5.73329	5.59776	2300	110092311	LOC110092311	protein NRT1/ PTR FAMILY 7.3, transcript variant X1	GO:0016021,GO:0005886,GO:0015112,GO:0015386,GO:0015293,GO:0010150,GO:0015706,GO:0055075,GO:1902600,GO:0010167	integral component of membrane|plasma membrane|nitrate transmembrane transporter activity|potassium:proton antiporter activity|symporter activity|leaf senescence|nitrate transport|potassium ion homeostasis|proton transmembrane transport|response to nitrate	-	-
XM_020816807.2	50.7689	0	101.538	Inf	Inf	1.41956e-10	1.07597e-08	Up	0.00793098	0	0	1.77927	1.94775	2.0195	2291	110092311	LOC110092311	protein NRT1/ PTR FAMILY 7.3, transcript variant X2	GO:0016021,GO:0005886,GO:0015112,GO:0015386,GO:0015293,GO:0010150,GO:0015706,GO:0055075,GO:1902600,GO:0010167	integral component of membrane|plasma membrane|nitrate transmembrane transporter activity|potassium:proton antiporter activity|symporter activity|leaf senescence|nitrate transport|potassium ion homeostasis|proton transmembrane transport|response to nitrate	-	-
XM_020816812.2	797.589	1253.75	341.431	0.272328	-1.87658	0.00191533	0.0159701	Down	36.7089	43.6577	38.8343	14.3211	10.1516	10.811	1256	110092313	LOC110092313	serine/arginine-rich splicing factor SR34A, transcript variant X3	GO:0005829,GO:0016607,GO:0005730,GO:0005634,GO:0005681,GO:0003729,GO:0003723,GO:0045292,GO:0000381,GO:0008380	cytosol|nuclear speck|nucleolus|nucleus|spliceosomal complex|mRNA binding|RNA binding|mRNA cis splicing, via spliceosome|regulation of alternative mRNA splicing, via spliceosome|RNA splicing	path:dct03040	Spliceosome
XM_020816818.2	2304.65	3617.99	991.318	0.273997	-1.86777	0.00150669	0.0131822	Down	36.1691	37.5718	36.4552	11.274	10.5764	10.9917	3921	110092317	LOC110092317	filament-like plant protein 4	GO:0005886,GO:0008017,GO:0046785,GO:0010090	plasma membrane|microtubule binding|microtubule polymerization|trichome morphogenesis	-	-
XM_020816819.2	6114.97	2316.88	9913.06	4.27862	2.09714	0.000361423	0.00413777	Up	26.9145	27.4375	26.4515	126.509	125.631	124.005	3424	110092318	LOC110092318	ubiquitin carboxyl-terminal hydrolase 9	GO:0004843,GO:0016579,GO:0006511	thiol-dependent ubiquitin-specific protease activity|protein deubiquitination|ubiquitin-dependent protein catabolic process	-	-
XM_020816825.2	41.7183	76.5194	6.91728	0.0903991	-3.46755	0.000420033	0.00466537	Down	1.94219	4.21275	3.78704	0.17701	0.0161242	0.791577	921	110092322	LOC110092322	NADH dehydrogenase [ubiquinone] 1 alpha subcomplex assembly factor 3-like, transcript variant X3	-	-	-	-
XM_020816826.2	53.25	98.2696	8.23044	0.0837536	-3.5777	0.000101251	0.00146215	Down	2.5557	5.3311	4.96088	0.21491	0.0186198	0.93244	916	110092322	LOC110092322	NADH dehydrogenase [ubiquinone] 1 alpha subcomplex assembly factor 3-like, transcript variant X2	-	-	-	-
XM_020816829.2	323.967	506.783	141.152	0.278526	-1.84412	0.00346473	0.0253747	Down	8.72606	8.60778	8.85499	2.5662	2.75464	2.61754	2311	110092325	LOC110092325	pentatricopeptide repeat-containing protein At5g46580, chloroplastic	-	-	-	-
XM_020816834.2	612.188	305.591	918.785	3.00659	1.58813	0.00847355	0.0502697	Up	6.64632	6.67348	7.28981	23.3193	21.8824	22.2361	1770	110092329	LOC110092329	polyadenylate-binding protein-interacting protein 11-like	GO:0005634,GO:0003723	nucleus|RNA binding	-	-
XM_020816844.2	74.8403	145.462	4.21889	0.0290034	-5.10763	3.86031e-08	1.62873e-06	Down	6.04562	4.45089	4.32191	0.113265	0.163215	0.179605	1171	110092338	LOC110092338	S-norcoclaurine synthase 1-like	GO:0050474,GO:0046872,GO:0016491,GO:0009820	(S)-norcoclaurine synthase activity|metal ion binding|oxidoreductase activity|alkaloid metabolic process	-	-
XM_020816849.2	177.012	263.605	90.4179	0.343005	-1.5437	0.0203206	0.0961322	Down	6.86239	7.29068	7.07041	2.6136	2.74637	2.57366	1484	110092343	LOC110092343	glucan endo-1,3-beta-glucosidase 11	GO:0031225,GO:0046658,GO:0005618,GO:0005576,GO:0005886,GO:0042973,GO:0005975,GO:0071555,GO:0006952	anchored component of membrane|anchored component of plasma membrane|cell wall|extracellular region|plasma membrane|glucan endo-1,3-beta-D-glucosidase activity|carbohydrate metabolic process|cell wall organization|defense response	-	-
XM_020816851.2	854.253	1403.01	305.499	0.217745	-2.19929	0.000291189	0.00348307	Down	38.0314	37.5023	37.0733	8.56167	8.6961	9.43097	1488	110092346	LOC110092346	uncharacterized LOC110092346	-	-	-	-
XM_020816852.2	181.462	320.049	42.8739	0.13396	-2.90012	3.25082e-05	0.00056042	Down	9.15547	8.68051	9.10707	1.27346	1.61292	1.04249	1418	110092347	LOC110092347	ubiquinol oxidase 1a, mitochondrial	GO:0016021,GO:0005743,GO:0005739,GO:0070469,GO:0009916,GO:0046872,GO:0102721,GO:0010230,GO:0045333,GO:0031930,GO:0009409	integral component of membrane|mitochondrial inner membrane|mitochondrion|respirasome|alternative oxidase activity|metal ion binding|ubiquinol:oxygen oxidoreductase activity|alternative respiration|cellular respiration|mitochondria-nucleus signaling pathway|response to cold	-	-
XM_020816860.2	44.8272	11.8217	77.8328	6.58391	2.71894	0.00350751	0.0256015	Up	0.0814241	0.070392	0.259427	0.937182	1.0091	0.938831	3501	110092353	LOC110092353	auxin response factor 7, transcript variant X2	GO:0005634,GO:0003677,GO:0009734,GO:0006355	nucleus|DNA binding|auxin-activated signaling pathway|regulation of transcription, DNA-templated	path:dct04075	Plant hormone signal transduction
XM_020816867.2	7.86773	0.318454	15.417	48.4121	5.5973	0.0206545	0.0971973	Up	0.0128527	2.69076e-05	0.00559338	0.439869	0.214871	0.260785	2221	110092358	LOC110092358	zinc finger CCCH domain-containing protein 5, transcript variant X3	GO:0005681,GO:0089701,GO:0003677,GO:0046872,GO:0030628,GO:0000398	spliceosomal complex|U2AF|DNA binding|metal ion binding|pre-mRNA 3'-splice site binding|mRNA splicing, via spliceosome	-	-
XM_020816883.2	220.368	331.414	109.321	0.329863	-1.60006	0.0121496	0.0657666	Down	3.35039	1.09908	1.70058	0.842965	0.447535	0.919047	6434	110092367	LOC110092367	protein NETWORKED 1D, transcript variant X2	GO:0005886,GO:0051015	plasma membrane|actin filament binding	-	-
XM_020816898.2	1834.47	3551.17	117.774	0.0331649	-4.9142	3.30748e-13	4.55602e-11	Down	157.22	154.56	149.218	6.84383	5.09206	4.66065	920	110092377	LOC110092377	1,2-dihydroxy-3-keto-5-methylthiopentene dioxygenase 2-like, transcript variant X3	GO:0005737,GO:0005634,GO:0010309,GO:0005506,GO:0019509,GO:0006555	cytoplasm|nucleus|acireductone dioxygenase [iron(II)-requiring] activity|iron ion binding|L-methionine salvage from methylthioadenosine|methionine metabolic process	path:dct00270,path:dct01100	Cysteine and methionine metabolism|Metabolic pathways
XM_020816901.2	108.949	32.9709	184.927	5.6088	2.48769	0.000778592	0.00774918	Up	1.16134	1.4729	1.5348	8.20024	8.20252	9.05706	945	110092380	LOC110092380	protein LIFEGUARD 2	GO:0016021	integral component of membrane	-	-
XM_020816907.2	174.377	298.889	49.8656	0.166836	-2.5835	0.000185132	0.00240003	Down	3.21999	3.5223	3.51196	0.510028	0.664959	0.685231	3481	110092384	LOC110092384	pentatricopeptide repeat-containing protein At3g22690	-	-	-	-
XM_020816924.2	109.208	49.2558	169.16	3.43433	1.78003	0.0140832	0.0730982	Up	0.646033	0.785104	1.57508	3.06874	3.69832	4.37762	1974	110092398	LOC110092398	putative WEB family protein At1g65010, chloroplastic, transcript variant X1	GO:0009507,GO:0005875,GO:0007131	chloroplast|microtubule associated complex|reciprocal meiotic recombination	-	-
XM_020816927.2	88.6094	151.087	26.1318	0.172959	-2.5315	0.00106689	0.00998907	Down	2.78852	3.02133	2.6406	0.570537	0.510109	0.517664	2132	110092399	LOC110092399	dicarboxylate transporter 2.1, chloroplastic	GO:0009507,GO:0009941,GO:0009706,GO:0009534,GO:0016021,GO:0009536,GO:0005313,GO:0015140,GO:0015131,GO:0019676,GO:0015813,GO:0071423,GO:0015729,GO:0009624	chloroplast|chloroplast envelope|chloroplast inner membrane|chloroplast thylakoid|integral component of membrane|plastid|L-glutamate transmembrane transporter activity|malate transmembrane transporter activity|oxaloacetate transmembrane transporter activity|ammonia assimilation cycle|L-glutamate transmembrane transport|malate transmembrane transport|oxaloacetate transport|response to nematode	-	-
XM_020816928.2	54.1295	83.7147	24.5443	0.29319	-1.77009	0.03643	0.146786	Down	3.56068	4.59047	4.10574	1.36669	1.23639	1.30406	818	110092400	LOC110092400	blue copper protein	GO:0009055,GO:0046872	electron transfer activity|metal ion binding	-	-
XM_020816934.2	343.005	665.383	20.6268	0.0309999	-5.01159	6.51056e-12	6.77256e-10	Down	14.5345	15.4117	15.1203	0.64412	0.355253	0.526577	1763	110092408	LOC110092408	protein NRT1/ PTR FAMILY 5.10	GO:0016021,GO:0035673,GO:1904680,GO:0015333	integral component of membrane|oligopeptide transmembrane transporter activity|peptide transmembrane transporter activity|peptide:proton symporter activity	-	-
XM_020816936.2	17.0293	34.0586	0	0	#NAME?	4.55482e-05	0.000744744	Down	1.39846	1.13715	1.37125	0	0	0	1037	110092409	LOC110092409	abscisic acid receptor PYL4-like	GO:0005737,GO:0005634,GO:0005886,GO:0010427,GO:0042803,GO:0004864,GO:0038023,GO:0009738,GO:0080163	cytoplasm|nucleus|plasma membrane|abscisic acid binding|protein homodimerization activity|protein phosphatase inhibitor activity|signaling receptor activity|abscisic acid-activated signaling pathway|regulation of protein serine/threonine phosphatase activity	path:dct04016,path:dct04075	MAPK signaling pathway - plant|Plant hormone signal transduction
XM_020816945.2	369.528	681.2	57.8571	0.0849342	-3.55751	1.23182e-07	4.54838e-06	Down	45.8836	43.3712	42.6129	4.89618	4.44138	2.89054	617	110092415	LOC110092415	uncharacterized LOC110092415	-	-	-	-
XM_020816949.2	18.2822	1.70978	34.8547	20.3855	4.34947	0.00212464	0.0173462	Up	0.0341231	0.0880659	0.0289305	0.94786	0.946821	0.869856	1652	110092414	LOC110092414	BTB/POZ domain and ankyrin repeat-containing protein NPR5-like	GO:0005634,GO:0009864,GO:0009877,GO:0010865	nucleus|induced systemic resistance, jasmonic acid mediated signaling pathway|nodulation|stipule development	path:dct04075	Plant hormone signal transduction
XM_020816962.2	94.526	42.0482	147.004	3.49608	1.80574	0.0149222	0.0761488	Up	0.424394	0.344122	0.334291	0.541144	3.1587	0.489487	4555	110092424	LOC110092424	filament-like plant protein 7, transcript variant X3	-	-	-	-
XM_020816966.2	51.2846	81.3356	21.2336	0.261061	-1.93754	0.0251699	0.112364	Down	0.510907	0.807409	0.957303	0.2435	0.233472	0.164832	4266	110092424	LOC110092424	filament-like plant protein 7, transcript variant X10	-	-	-	-
XM_020816968.2	9097.23	15744.7	2449.76	0.155593	-2.68415	7.79678e-06	0.000166341	Down	104.892	105.334	103.78	17.8165	17.7582	17.5807	5988	110092425	LOC110092425	protein TSS	GO:0005737,GO:0005886,GO:0007049,GO:0007275,GO:0009737	cytoplasm|plasma membrane|cell cycle|multicellular organism development|response to abscisic acid	-	-
XM_020816970.2	5086.7	7990.54	2182.86	0.273181	-1.87207	0.00134347	0.0120267	Down	357.89	336.673	337.078	99.5147	107.461	99.595	925	110092426	LOC110092426	photosystem II core complex proteins psbY, chloroplastic, transcript variant X2	GO:0009535,GO:0016021,GO:0009523,GO:0030145,GO:0015979	chloroplast thylakoid membrane|integral component of membrane|photosystem II|manganese ion binding|photosynthesis	path:dct00195	Photosynthesis
XM_020816971.2	416.485	688.293	144.678	0.210197	-2.25018	0.00034807	0.00401846	Down	13.082	12.7739	12.2502	2.70117	3.29754	2.72043	2158	110092428	LOC110092428	uncharacterized LOC110092428	-	-	-	-
XM_020816975.2	1305.56	2154.49	456.641	0.211949	-2.23821	0.000200339	0.00256957	Down	12.4609	13.1608	13.4484	2.90795	3.4013	2.70133	6585	110092427	LOC110092427	protein NETWORKED 1B, transcript variant X1	GO:0005886,GO:0051015	plasma membrane|actin filament binding	-	-
XM_020816980.2	958.54	532.939	1384.14	2.59718	1.37695	0.0195495	0.0935812	Up	5.27314	4.90092	5.42159	18.7631	10.6907	14.5652	4084	110092430	LOC110092430	alpha-mannosidase 2, transcript variant X1	GO:0005768,GO:0005794,GO:0000139,GO:0016021,GO:0005802,GO:0004559,GO:0030246,GO:0004572,GO:0046872,GO:0042538,GO:0006013,GO:0006491,GO:0006517,GO:0006487	endosome|Golgi apparatus|Golgi membrane|integral component of membrane|trans-Golgi network|alpha-mannosidase activity|carbohydrate binding|mannosyl-oligosaccharide 1,3-1,6-alpha-mannosidase activity|metal ion binding|hyperosmotic salinity response|mannose metabolic process|N-glycan processing|protein deglycosylation|protein N-linked glycosylation	path:dct00510,path:dct00513,path:dct01100	N-Glycan biosynthesis|Various types of N-glycan biosynthesis|Metabolic pathways
XM_020816988.2	931.258	144.078	1718.44	11.9271	3.57617	2.64907e-08	1.15317e-06	Up	3.83583	4.07125	4.63243	53.4358	54.1148	55.1783	1372	110092433	LOC110092433	uncharacterized LOC110092433	-	-	-	-
XM_020816993.2	211.273	363.396	59.1495	0.162769	-2.61911	0.000108298	0.00153887	Down	17.9991	18.5461	18.5968	2.51966	4.32375	2.90126	787	110092436	LOC110092436	uncharacterized LOC110092436, transcript variant X1	-	-	-	-
XM_020817001.2	488.839	907.605	70.073	0.0772064	-3.69513	2.5434e-08	1.11521e-06	Down	6.90865	5.89443	3.71855	0.591791	0.043078	0.756343	6561	110092427	LOC110092427	protein NETWORKED 1B, transcript variant X5	GO:0005886,GO:0051015	plasma membrane|actin filament binding	-	-
XM_020817002.2	251.292	133.877	368.708	2.75409	1.46158	0.0218594	0.101391	Up	4.37487	4.37721	4.14163	12.765	13.5512	12.376	1239	110092443	LOC110092443	probable galacturonosyltransferase-like 6	GO:0005794,GO:0000139,GO:0016021,GO:0047262,GO:0071555,GO:0045489	Golgi apparatus|Golgi membrane|integral component of membrane|polygalacturonate 4-alpha-galacturonosyltransferase activity|cell wall organization|pectin biosynthetic process	-	-
XM_020817003.2	176.976	69.3681	284.583	4.10251	2.03651	0.00258513	0.0201097	Up	1.13129	1.20682	1.39053	5.64002	5.28327	5.6889	2227	110092444	LOC110092444	pentatricopeptide repeat-containing protein At1g80550, mitochondrial	-	-	-	-
XM_020817015.2	955.246	563.221	1347.27	2.39208	1.25827	0.0317871	0.132539	Up	15.2479	18.2002	15.8401	43.0535	41.8471	43.4073	1364	110092459	LOC110092459	immune-associated nucleotide-binding protein 9, transcript variant X1	GO:0005525,GO:1902478	GTP binding|negative regulation of defense response to bacterium, incompatible interaction	-	-
XM_020817018.2	52.1532	79.6386	24.6677	0.309745	-1.69085	0.0440707	0.168055	Down	5.67791	1.43061	2.00466	1.55368	0.854913	0.667475	1045	110092462	LOC110092462	uncharacterized LOC110092462	-	-	-	-
XM_020817020.2	406.034	218.263	593.806	2.7206	1.44392	0.0196582	0.0938785	Up	1.35835	1.09309	2.33286	4.48585	5.2442	4.42614	5451	110092460	LOC110092460	DDT domain-containing protein PTM, transcript variant X1	GO:0009941,GO:0009707,GO:0016021,GO:0005634,GO:0046872,GO:0035064,GO:0010019,GO:0045893	chloroplast envelope|chloroplast outer membrane|integral component of membrane|nucleus|metal ion binding|methylated histone binding|chloroplast-nucleus signaling pathway|positive regulation of transcription, DNA-templated	-	-
XM_020817021.2	735.565	273.07	1198.06	4.38738	2.13336	0.00045222	0.00496118	Up	4.67722	4.84141	3.52528	20.3496	21.7843	20.1573	2499	110092464	LOC110092464	RNA-binding protein 38, transcript variant X1	GO:0005634,GO:1990904,GO:0003729,GO:0003723,GO:0006397,GO:0010029,GO:0009737,GO:0009651,GO:0009414	nucleus|ribonucleoprotein complex|mRNA binding|RNA binding|mRNA processing|regulation of seed germination|response to abscisic acid|response to salt stress|response to water deprivation	-	-
XM_020817022.2	81.4481	29.7689	133.127	4.47202	2.16093	0.00508701	0.0341857	Up	0.684428	1.14196	1.10251	4.64604	4.78224	4.88729	1210	110092464	LOC110092464	RNA-binding protein 38, transcript variant X2	GO:0005634,GO:1990904,GO:0003729,GO:0003723,GO:0006397,GO:0010029,GO:0009737,GO:0009651,GO:0009414	nucleus|ribonucleoprotein complex|mRNA binding|RNA binding|mRNA processing|regulation of seed germination|response to abscisic acid|response to salt stress|response to water deprivation	-	-
XM_020817031.2	6.13143	0	12.2629	Inf	Inf	0.0220976	0.102132	Up	2.17792e-07	2.70094e-06	7.17833e-07	0.50493	0.470861	0.470575	1098	110092469	LOC110092469	uncharacterized LOC110092469, transcript variant X1	-	-	-	-
XM_020817034.2	137.522	68.7999	206.244	2.99774	1.58388	0.0215784	0.100394	Up	2.42077	2.76446	3.07029	8.15231	9.60296	9.08211	997	110092470	LOC110092470	putative caffeoyl-CoA O-methyltransferase At1g67980	GO:0005829,GO:0042409,GO:0046872,GO:0009809	cytosol|caffeoyl-CoA O-methyltransferase activity|metal ion binding|lignin biosynthetic process	path:dct00940,path:dct00941,path:dct00945,path:dct01100,path:dct01110	Phenylpropanoid biosynthesis|Flavonoid biosynthesis|Stilbenoid, diarylheptanoid and gingerol biosynthesis|Metabolic pathways|Biosynthesis of secondary metabolites
XM_020817050.2	4875.17	9417.43	332.919	0.0353514	-4.82209	3.74464e-13	5.08849e-11	Down	274.774	271.88	271.285	10.4915	10.6836	10.3015	1375	110092480	LOC110092480	glutamine synthetase nodule isozyme	GO:0005737,GO:0005524,GO:0004356,GO:0006542	cytoplasm|ATP binding|glutamate-ammonia ligase activity|glutamine biosynthetic process	path:dct00220,path:dct00250,path:dct00630,path:dct00910,path:dct01100,path:dct01230	Arginine biosynthesis|Alanine, aspartate and glutamate metabolism|Glyoxylate and dicarboxylate metabolism|Nitrogen metabolism|Metabolic pathways|Biosynthesis of amino acids
XM_020817053.2	3242.02	1470.6	5013.43	3.40911	1.7694	0.00233619	0.0185659	Up	9.52297	13.2407	9.93913	40.151	39.0857	42.0924	5369	110092460	LOC110092460	DDT domain-containing protein PTM, transcript variant X4	GO:0009941,GO:0009707,GO:0016021,GO:0005634,GO:0046872,GO:0035064,GO:0010019,GO:0045893	chloroplast envelope|chloroplast outer membrane|integral component of membrane|nucleus|metal ion binding|methylated histone binding|chloroplast-nucleus signaling pathway|positive regulation of transcription, DNA-templated	-	-
XM_020817060.2	2123	590.002	3656.01	6.19661	2.63148	1.40194e-05	0.000277874	Up	11.2594	10.9807	11.3164	75.4634	76.6265	74.0897	2100	110092488	LOC110092488	calmodulin binding protein PICBP	GO:0005886,GO:0005516,GO:0006952	plasma membrane|calmodulin binding|defense response	-	-
XM_020817071.2	40.3923	10.8735	69.9111	6.42947	2.6847	0.00445766	0.0308498	Up	0.0146409	0.198848	0.172239	0.878072	1.06179	0.669666	3478	110092499	LOC110092499	WD repeat-containing protein 36, transcript variant X1	GO:0032153,GO:0005829,GO:0072686,GO:0005730,GO:0005634,GO:0034388,GO:0032040,GO:0006364	cell division site|cytosol|mitotic spindle|nucleolus|nucleus|Pwp2p-containing subcomplex of 90S preribosome|small-subunit processome|rRNA processing	path:dct03008	Ribosome biogenesis in eukaryotes
XM_020817073.2	141.002	32.8368	249.168	7.58805	2.92373	5.82995e-05	0.000912199	Up	0.485162	0.26686	0.411992	3.43762	2.99548	3.18405	3361	110092501	LOC110092501	alpha,alpha-trehalose-phosphate synthase [UDP-forming] 6	GO:0005737,GO:0005829,GO:0003825,GO:0004805,GO:0005992	cytoplasm|cytosol|alpha,alpha-trehalose-phosphate synthase (UDP-forming) activity|trehalose-phosphatase activity|trehalose biosynthetic process	path:dct00500,path:dct01100,path:dct01110	Starch and sucrose metabolism|Metabolic pathways|Biosynthesis of secondary metabolites
XM_020817081.2	393.785	218.964	568.606	2.5968	1.37673	0.0257447	0.114128	Up	5.70874	3.63996	6.57183	18.3853	15.6761	10.9157	1642	110092505	LOC110092505	uncharacterized LOC110092505, transcript variant X2	-	-	-	-
XM_020817082.2	92.1264	182.332	1.92044	0.0105326	-6.56899	3.09076e-11	2.72628e-09	Down	3.71284e-05	5.41549	8.50871	0.0791249	0.0561485	0.0326967	1564	110092505	LOC110092505	uncharacterized LOC110092505, transcript variant X4	-	-	-	-
XM_020817084.2	763.377	1416.04	110.717	0.0781879	-3.67691	1.53131e-08	7.06345e-07	Down	66.2208	64.6265	66.0111	4.81687	7.19221	4.69307	859	110092506	LOC110092506	protein CURVATURE THYLAKOID 1A, chloroplastic	GO:0009507,GO:0009941,GO:0009534,GO:0009535,GO:0005829,GO:0016021,GO:0010287,GO:0009579	chloroplast|chloroplast envelope|chloroplast thylakoid|chloroplast thylakoid membrane|cytosol|integral component of membrane|plastoglobule|thylakoid	-	-
XM_020817089.2	891.352	1254.44	528.266	0.421118	-1.2477	0.0342638	0.140306	Down	23.7416	23.2643	24.7251	11.5668	10.7239	10.5793	2088	110092509	LOC110092509	SWI/SNF complex component SNF12 homolog	GO:0005634,GO:0006325,GO:0006281,GO:0009909,GO:0010468,GO:2000024,GO:0010224,GO:0048364	nucleus|chromatin organization|DNA repair|regulation of flower development|regulation of gene expression|regulation of leaf development|response to UV-B|root development	-	-
XM_020817092.2	9.43904	0.636907	18.2412	28.6402	4.83997	0.0179008	0.0873674	Up	0.0586366	8.38942e-05	0.00193916	0.408375	1.06713	0.0129643	1591	110092512	LOC110092512	nuclear pore complex protein NUP54, transcript variant X1	GO:0005635,GO:0044613,GO:0005730,GO:0017056,GO:0051028,GO:0006607,GO:0006999,GO:0036228	nuclear envelope|nuclear pore central transport channel|nucleolus|structural constituent of nuclear pore|mRNA transport|NLS-bearing protein import into nucleus|nuclear pore organization|protein localization to nuclear inner membrane	path:dct03013	RNA transport
XM_020817095.2	1357.45	697.877	2017.03	2.89023	1.53118	0.00948774	0.0548623	Up	24.4965	17.4632	23.3266	74.7041	66.158	64.3293	1277	110092514	LOC110092514	uncharacterized protein At3g27210, transcript variant X2	GO:0005886	plasma membrane	-	-
XM_020817116.2	23.9485	4.87456	43.0225	8.82593	3.14175	0.00793519	0.0478284	Up	0.309201	0.0620335	0.139738	2.52715	1.33412	1.37323	1067	110092528	LOC110092528	aquaporin PIP1-2	GO:0005829,GO:0005783,GO:0016021,GO:0005886,GO:0009506,GO:0032991,GO:0005773,GO:0015250,GO:0051290,GO:0051289,GO:0009414	cytosol|endoplasmic reticulum|integral component of membrane|plasma membrane|plasmodesma|protein-containing complex|vacuole|water channel activity|protein heterotetramerization|protein homotetramerization|response to water deprivation	-	-
XM_020817118.2	78.7555	34.569	122.942	3.55642	1.83043	0.0173891	0.0854778	Up	0.530364	0.598815	0.621802	2.30858	2.38419	2.10275	2347	110092530	LOC110092530	galactoside 2-alpha-L-fucosyltransferase	GO:0032580,GO:0016021,GO:0008107,GO:0042546,GO:0071555,GO:0006486	Golgi cisterna membrane|integral component of membrane|galactoside 2-alpha-L-fucosyltransferase activity|cell wall biogenesis|cell wall organization|protein glycosylation	-	-
XM_020817124.2	20.311	39.9933	0.628687	0.0157198	-5.99127	0.00012567	0.00174624	Down	1.43393	1.09636	0.116561	0.0351226	3.46454e-09	1.04676e-06	1805	110092513	LOC110092513	probable methyltransferase PMT7, transcript variant X5	GO:0005789,GO:0005768,GO:0005794,GO:0016021,GO:0005802,GO:0008168	endoplasmic reticulum membrane|endosome|Golgi apparatus|integral component of membrane|trans-Golgi network|methyltransferase activity	-	-
XM_020817127.2	186.139	78.5001	293.778	3.74239	1.90396	0.00446862	0.0309115	Up	4.25973	3.86817	4.41318	17.1975	15.5851	18.1716	749	110092536	LOC110092536	thioredoxin-like protein CXXS1	GO:0005623,GO:0005829,GO:0005576,GO:0003756,GO:0045454	cell|cytosol|extracellular region|protein disulfide isomerase activity|cell redox homeostasis	-	-
XM_020817133.2	10840.9	16127	5554.76	0.344439	-1.53768	0.00766441	0.046606	Down	388.669	387.507	387.559	146.006	145.948	144.127	1655	110092540	LOC110092540	serine--glyoxylate aminotransferase	GO:0048046,GO:0009507,GO:0009570,GO:0005829,GO:0005739,GO:0005777,GO:0005886,GO:0008453,GO:0050281,GO:0004760,GO:0019265,GO:0009853	apoplast|chloroplast|chloroplast stroma|cytosol|mitochondrion|peroxisome|plasma membrane|alanine-glyoxylate transaminase activity|serine-glyoxylate transaminase activity|serine-pyruvate transaminase activity|glycine biosynthetic process, by transamination of glyoxylate|photorespiration	path:dct00250,path:dct00260,path:dct00630,path:dct01100,path:dct01110,path:dct01200,path:dct04146	Alanine, aspartate and glutamate metabolism|Glycine, serine and threonine metabolism|Glyoxylate and dicarboxylate metabolism|Metabolic pathways|Biosynthesis of secondary metabolites|Carbon metabolism|Peroxisome
XM_020817135.2	14.9438	0.674135	29.2135	43.3348	5.43745	0.00143285	0.0126388	Up	0.00471329	0.00928895	0.000935194	0.04461	0.364226	0.166941	6614	110092544	LOC110092544	TATA-binding protein-associated factor BTAF1, transcript variant X2	GO:0005634,GO:0005524,GO:0003677,GO:0008094,GO:0004386,GO:1902185	nucleus|ATP binding|DNA binding|DNA-dependent ATPase activity|helicase activity|positive regulation of shoot apical meristem development	-	-
XM_020817138.2	12.6383	0	25.2767	Inf	Inf	0.000502547	0.00540283	Up	1.2758e-13	3.19887e-13	5.6013e-14	1.16223	1.15003	1.56707	854	110092546	LOC110092546	UPF0047 protein YjbQ, transcript variant X2	GO:0005829,GO:0005634	cytosol|nucleus	-	-
XM_020817140.2	34.0883	11.5881	56.5885	4.88335	2.28787	0.0212781	0.0993228	Up	0.685725	0.576321	0.637048	3.03548	3.48113	3.47463	737	110092549	LOC110092549	uncharacterized LOC110092549	-	-	-	-
XM_020817143.2	3949.75	5794.09	2105.41	0.363372	-1.46048	0.0114446	0.0628299	Down	67.2605	64.2562	65.2773	25.9417	25.2392	26.6196	3516	110092551	LOC110092551	phototropin-2, transcript variant X4	GO:0005737,GO:0005634,GO:0005886,GO:0005524,GO:0009882,GO:0004674,GO:0006468,GO:0018298	cytoplasm|nucleus|plasma membrane|ATP binding|blue light photoreceptor activity|protein serine/threonine kinase activity|protein phosphorylation|protein-chromophore linkage	-	-
XM_020817153.2	112.411	222.234	2.58859	0.011648	-6.42377	6.25372e-12	6.57337e-10	Down	3.37532	5.0944	3.45299	6.88225e-10	0.128359	0.0192803	2225	110092556	LOC110092556	probable isoaspartyl peptidase/L-asparaginase 2	GO:0005737,GO:0004067,GO:0008798,GO:0016540	cytoplasm|asparaginase activity|beta-aspartyl-peptidase activity|protein autoprocessing	-	-
XM_020817159.2	962.12	158.635	1765.6	11.13	3.47638	5.12874e-08	2.08797e-06	Up	3.07846	3.65649	3.15029	39.522	40.7341	39.4122	1917	110092561	LOC110092561	RNA polymerase sigma factor sigE, chloroplastic/mitochondrial	GO:0009507,GO:0005739,GO:0003677,GO:0003700,GO:0016987,GO:0071483,GO:0071472,GO:0009658,GO:0006352,GO:0009553,GO:0010207,GO:0045893,GO:2001141,GO:0010218,GO:0010114	chloroplast|mitochondrion|DNA binding|DNA-binding transcription factor activity|sigma factor activity|cellular response to blue light|cellular response to salt stress|chloroplast organization|DNA-templated transcription, initiation|embryo sac development|photosystem II assembly|positive regulation of transcription, DNA-templated|regulation of RNA biosynthetic process|response to far red light|res…	-	-
XM_020817162.2	453.737	638.442	269.032	0.421388	-1.24678	0.0394865	0.155238	Down	16.9555	15.1763	13.0969	6.90633	6.15248	7.66782	1686	110092563	LOC110092563	chitinase domain-containing protein 1, transcript variant X1	-	-	-	-
XM_020817167.2	482.686	251.672	713.701	2.83584	1.50378	0.0135336	0.0710979	Up	14.6606	15.0663	15.7857	46.4392	45.778	48.0823	661	110092543	LOC110092543	uncharacterized LOC110092543	-	-	-	-
XM_020817174.2	108.797	179.059	38.5354	0.21521	-2.21618	0.0027558	0.0211284	Down	3.69728	6.60703	4.52071	1.87801	0.466421	1.09934	1442	110092570	LOC110092570	probable caffeoyl-CoA O-methyltransferase 1, transcript variant X1	GO:0005634,GO:0046872,GO:0008171,GO:0008757,GO:0032259	nucleus|metal ion binding|O-methyltransferase activity|S-adenosylmethionine-dependent methyltransferase activity|methylation	-	-
XM_020817185.2	917.934	1272.96	562.909	0.442205	-1.17721	0.0455399	0.172199	Down	25.4094	28.9315	35.2758	14.5212	15.734	12.8623	1696	110092574	LOC110092574	probable homogentisate phytyltransferase 1, chloroplastic, transcript variant X3	GO:0031969,GO:0016021,GO:0047292	chloroplast membrane|integral component of membrane|trihydroxypterocarpan dimethylallyltransferase activity	path:dct00130,path:dct01100,path:dct01110	Ubiquinone and other terpenoid-quinone biosynthesis|Metabolic pathways|Biosynthesis of secondary metabolites
XM_020817192.2	94.2976	48.9348	139.66	2.85401	1.51299	0.0404412	0.158071	Up	0.450751	0.374726	0.458719	1.24808	1.36575	1.38916	4534	110092578	LOC110092578	indole-3-acetaldehyde oxidase	GO:0005737,GO:0051537,GO:0009055,GO:0071949,GO:0050302,GO:0005506,GO:0043546,GO:0009688,GO:0009851,GO:0055114	cytoplasm|2 iron, 2 sulfur cluster binding|electron transfer activity|FAD binding|indole-3-acetaldehyde oxidase activity|iron ion binding|molybdopterin cofactor binding|abscisic acid biosynthetic process|auxin biosynthetic process|oxidation-reduction process	path:dct00906,path:dct01100,path:dct01110	Carotenoid biosynthesis|Metabolic pathways|Biosynthesis of secondary metabolites
XM_020817194.2	260.661	129.519	391.802	3.02505	1.59696	0.0123337	0.0665005	Up	8.44744	8.59091	8.59274	28.3171	27.6428	28.4947	603	110092580	LOC110092580	glutamyl-tRNA(Gln) amidotransferase subunit C, chloroplastic/mitochondrial	GO:0009507,GO:0030956,GO:0005739,GO:0005524,GO:0050567,GO:0070681,GO:0032543,GO:0006450	chloroplast|glutamyl-tRNA(Gln) amidotransferase complex|mitochondrion|ATP binding|glutaminyl-tRNA synthase (glutamine-hydrolyzing) activity|glutaminyl-tRNAGln biosynthesis via transamidation|mitochondrial translation|regulation of translational fidelity	path:dct00970,path:dct01100	Aminoacyl-tRNA biosynthesis|Metabolic pathways
XM_020817197.2	12.692	22.8693	2.51475	0.109962	-3.18493	0.0414642	0.160778	Down	0.185308	0.183707	0.214779	0.0654827	0.000826284	3.60465e-06	4735	110092581	LOC110092581	F-box protein At3g54460, transcript variant X2	GO:0009506,GO:0005524,GO:0004386,GO:0008270	plasmodesma|ATP binding|helicase activity|zinc ion binding	-	-
XM_020817200.2	306.876	604.947	8.80562	0.014556	-6.10224	6.98742e-15	1.40526e-12	Down	17.1805	17.8129	15.5264	0.188194	0.14392	0.445998	1430	110092585	LOC110092585	60S ribosomal protein L3, transcript variant X1	GO:0022625,GO:0003735,GO:0000027,GO:0006412	cytosolic large ribosomal subunit|structural constituent of ribosome|ribosomal large subunit assembly|translation	path:dct03010	Ribosome
XM_020817202.2	22.6904	40.8774	4.50341	0.110169	-3.18222	0.0078346	0.0474115	Down	1.38451	0.616324	1.59691	0.0251115	0.413081	0.00547239	1346	110092585	LOC110092585	60S ribosomal protein L3, transcript variant X2	GO:0022625,GO:0003735,GO:0000027,GO:0006412	cytosolic large ribosomal subunit|structural constituent of ribosome|ribosomal large subunit assembly|translation	path:dct03010	Ribosome
XM_020817204.2	47.5707	73.1192	22.0222	0.301183	-1.73129	0.0479096	0.17846	Down	1.57808	2.14161	1.8512	0.620197	0.437522	0.781126	1572	110092586	LOC110092586	amino acid permease 8	GO:0016021,GO:0016020,GO:0005886,GO:0015171,GO:0015293,GO:0003333	integral component of membrane|membrane|plasma membrane|amino acid transmembrane transporter activity|symporter activity|amino acid transmembrane transport	-	-
XM_020817205.2	967.264	580.528	1354	2.33236	1.22179	0.0376124	0.149987	Up	9.03674	8.7797	7.4594	20.3854	21.595	22.1626	2742	110092587	LOC110092587	putative RNA polymerase II subunit B1 CTD phosphatase RPAP2 homolog, transcript variant X1	GO:0005737,GO:0005829,GO:0005634,GO:0046872,GO:0043175,GO:0008420,GO:0030154,GO:0070940	cytoplasm|cytosol|nucleus|metal ion binding|RNA polymerase core enzyme binding|RNA polymerase II CTD heptapeptide repeat phosphatase activity|cell differentiation|dephosphorylation of RNA polymerase II C-terminal domain	-	-
XM_020817210.2	649.14	250.829	1047.45	4.17595	2.0621	0.000806437	0.00796187	Up	2.96274	2.43955	3.19548	8.91347	12.0282	18.0858	3489	110092588	LOC110092588	receptor protein-tyrosine kinase CEPR2, transcript variant X2	GO:0016021,GO:0005886,GO:0005524,GO:0042277,GO:0017046,GO:0001653,GO:0004674,GO:0004714,GO:1902025,GO:2000280,GO:0048831,GO:0010555,GO:0090548,GO:0006970	integral component of membrane|plasma membrane|ATP binding|peptide binding|peptide hormone binding|peptide receptor activity|protein serine/threonine kinase activity|transmembrane receptor protein tyrosine kinase activity|nitrate import|regulation of root development|regulation of shoot system development|response to mannitol|response to nitrate starvation|response to osmotic stress	-	-
XM_020817215.2	33.5564	56.9434	10.1695	0.178589	-2.48528	0.0145837	0.0749096	Down	0.721981	0.805259	0.284542	0.199049	0.154756	8.39313e-08	3743	110092581	LOC110092581	F-box protein At3g54460, transcript variant X4	GO:0009506,GO:0005524,GO:0004386,GO:0008270	plasmodesma|ATP binding|helicase activity|zinc ion binding	-	-
XM_020817231.2	40.7214	69.505	11.9378	0.171755	-2.54158	0.00709352	0.0439225	Down	6.2099	5.08479	5.22218	1.0265	1.11682	0.907893	503	110092599	LOC110092599	uncharacterized LOC110092599	-	-	-	-
XM_020817239.2	5024.41	3050.89	6997.93	2.29373	1.1977	0.0366491	0.147312	Up	34.0011	34.1186	35.9203	89.0227	90.9813	79.5926	3502	110092608	LOC110092608	RNA cytidine acetyltransferase 1, transcript variant X1	GO:0005730,GO:0005524,GO:1990883,GO:1904812,GO:0051391	nucleolus|ATP binding|rRNA cytidine N-acetyltransferase activity|rRNA acetylation involved in maturation of SSU-rRNA|tRNA acetylation	path:dct03008	Ribosome biogenesis in eukaryotes
XM_020817240.2	10.9014	1.32852	20.4742	15.4113	3.94592	0.0243784	0.109797	Up	3.42223e-08	0.0529403	0.100407	0.936846	1.09734	0.232063	1182	110092609	LOC110092609	50S ribosomal protein L19, chloroplastic, transcript variant X1	GO:0009507,GO:0005840,GO:0019843,GO:0003735,GO:0006412	chloroplast|ribosome|rRNA binding|structural constituent of ribosome|translation	path:dct03010	Ribosome
XM_020817255.2	594.948	324.985	864.912	2.66139	1.41218	0.0187204	0.0905754	Up	9.08034	9.28302	9.92646	27.7259	28.4014	25.7015	1373	110092617	LOC110092617	chromatin remodeling protein EBS, transcript variant X2	GO:0005634,GO:0003682,GO:0046872,GO:0035064,GO:0000976,GO:0006325,GO:0009908,GO:0035067,GO:0048579,GO:0009791,GO:2000028,GO:0006355,GO:0009845	nucleus|chromatin binding|metal ion binding|methylated histone binding|transcription regulatory region sequence-specific DNA binding|chromatin organization|flower development|negative regulation of histone acetylation|negative regulation of long-day photoperiodism, flowering|post-embryonic development|regulation of photoperiodism, flowering|regulation of transcription, DNA-templated|seed germinat…	-	-
XM_020817261.2	209.285	65.2189	353.352	5.41794	2.43774	0.000281619	0.00339552	Up	1.03364	1.24748	1.27137	8.12818	6.0755	6.73219	2193	110092622	LOC110092622	squamosa promoter-binding-like protein 18, transcript variant X1	GO:0005634,GO:0003677,GO:0046872	nucleus|DNA binding|metal ion binding	-	-
XM_020817262.2	72.0562	16.3266	127.786	7.82684	2.96843	0.000363282	0.00414647	Up	0.236421	0.118042	0.550228	1.85964	3.39998	2.40728	2169	110092622	LOC110092622	squamosa promoter-binding-like protein 18, transcript variant X2	GO:0005634,GO:0003677,GO:0046872	nucleus|DNA binding|metal ion binding	-	-
XM_020817271.2	153.452	84.3291	222.575	2.63935	1.40019	0.038073	0.151364	Up	2.6044	2.58871	2.56322	6.99036	7.96854	7.24131	1303	110092631	LOC110092631	uncharacterized LOC110092631	-	-	-	-
XM_020817275.2	80.0472	154.616	5.47854	0.0354332	-4.81875	8.44389e-08	3.26155e-06	Down	2.7218	3.2339	2.83041	0.0815281	0.194198	0.0566197	2103	110092634	LOC110092634	uncharacterized LOC110092634, transcript variant X1	GO:0005783,GO:0005887,GO:1903425,GO:0140114,GO:0140116,GO:1903424	endoplasmic reticulum|integral component of plasma membrane|fluoride transmembrane transporter activity|cellular detoxification of fluoride|fluoride export across plasma membrane|fluoride transmembrane transport	-	-
XM_020817296.2	242.084	344.569	139.6	0.405144	-1.30349	0.0407837	0.158977	Down	4.96886	4.45472	4.82172	2.23578	2.17706	1.86676	2888	110092649	LOC110092649	receptor-like protein kinase FERONIA	GO:0016021,GO:0005886,GO:0009506,GO:0009536,GO:0005524,GO:0004672,GO:0004674,GO:0046777	integral component of membrane|plasma membrane|plasmodesma|plastid|ATP binding|protein kinase activity|protein serine/threonine kinase activity|protein autophosphorylation	-	-
XM_020817301.2	267.736	448.75	86.7223	0.193253	-2.37144	0.000305453	0.0036221	Down	10.5454	11.5797	9.93437	2.84424	2.32701	1.54652	1671	110092654	LOC110092654	E3 ubiquitin-protein ligase TRAIP, transcript variant X2	GO:0016021,GO:0046872,GO:0016740,GO:0016567	integral component of membrane|metal ion binding|transferase activity|protein ubiquitination	-	-
XM_020817302.2	71.1545	28.2229	114.086	4.04233	2.01519	0.0111925	0.0618622	Up	1.26072	1.36661	1.48922	5.94525	5.7846	6.33312	820	110092656	LOC110092656	EEF1A lysine methyltransferase 4-like	-	-	-	-
XM_020817306.2	296.785	97.3893	496.18	5.09481	2.34903	0.000289431	0.00346891	Up	0.293846	0.605462	1.08031	3.30507	3.57807	4.11432	5861	110092659	LOC110092659	histone-lysine N-methyltransferase SUVR5, transcript variant X2	GO:0005694,GO:0005634,GO:0003700,GO:0018024,GO:0043565,GO:0008270,GO:0006338,GO:0006342,GO:0034968,GO:1900109	chromosome|nucleus|DNA-binding transcription factor activity|histone-lysine N-methyltransferase activity|sequence-specific DNA binding|zinc ion binding|chromatin remodeling|chromatin silencing|histone lysine methylation|regulation of histone H3-K9 dimethylation	-	-
XM_020817326.2	309.119	472.999	145.239	0.30706	-1.70341	0.00692703	0.0431062	Down	27.196	26.8776	27.4166	9.55117	8.75293	8.888	693	110092679	LOC110092679	probable esterase D14L	GO:0005737,GO:0005634,GO:0016787,GO:0036377,GO:0080167	cytoplasm|nucleus|hydrolase activity|arbuscular mycorrhizal association|response to karrikin	-	-
XM_020817367.2	535.774	747.285	324.262	0.433921	-1.2045	0.0442399	0.168593	Down	14.4759	13.2491	14.4381	5.49172	8.05546	6.35597	2117	110092710	LOC110092710	putative glucuronosyltransferase PGSIP8, transcript variant X1	GO:0016021,GO:0046872,GO:0016757	integral component of membrane|metal ion binding|transferase activity, transferring glycosyl groups	-	-
XM_020817374.2	179.583	302.75	56.4166	0.186347	-2.42393	0.000387848	0.00438012	Down	13.2846	10.1851	11.3501	2.74775	2.07116	2.26678	1039	110092715	LOC110092715	probable plastid-lipid-associated protein 11, chloroplastic	GO:0009534	chloroplast thylakoid	-	-
XM_020817379.2	316.89	453.351	180.428	0.397988	-1.3292	0.0322791	0.133961	Down	13.0835	11.9331	12.9304	5.23469	5.34423	5.85785	1427	110092721	LOC110092721	uncharacterized LOC110092721	-	-	-	-
XM_020817385.2	3673.97	5044.19	2303.75	0.456712	-1.13064	0.0489668	0.180983	Down	130.54	135.662	137	68.7226	63.4052	68.2083	1494	110092726	LOC110092726	monodehydroascorbate reductase 3, cytosolic	GO:0048046,GO:0009507,GO:0005782,GO:0005886,GO:0050660,GO:0016656,GO:0098869,GO:0046686	apoplast|chloroplast|peroxisomal matrix|plasma membrane|flavin adenine dinucleotide binding|monodehydroascorbate reductase (NADH) activity|cellular oxidant detoxification|response to cadmium ion	path:dct00053,path:dct01100	Ascorbate and aldarate metabolism|Metabolic pathways
XM_020817389.2	116.161	185.965	46.357	0.249278	-2.00417	0.00569492	0.0372342	Down	10.2549	10.9649	7.79487	3.96277	2.69842	1.17921	766	110092727	LOC110092727	acyl-coenzyme A thioesterase 13, transcript variant X4	-	-	-	-
XM_020817403.2	654.799	393.212	916.385	2.33051	1.22065	0.0400306	0.156811	Up	7.91413	8.68562	8.09777	20.7922	20.775	21.0242	1902	110092737	LOC110092737	DEAD-box ATP-dependent RNA helicase 5	GO:0005829,GO:0005730,GO:0005524,GO:0003723,GO:0003724,GO:0006364	cytosol|nucleolus|ATP binding|RNA binding|RNA helicase activity|rRNA processing	-	-
XM_020817404.2	212.603	6.90279	418.303	60.5991	5.92122	3.13854e-13	4.38335e-11	Up	0.672173	0.371767	0.332992	29.1149	26.9789	31.5544	620	110092738	LOC110092738	uncharacterized LOC110092738	-	-	-	-
XM_020817414.2	147.449	221.363	73.5354	0.332194	-1.5899	0.0208887	0.0980016	Down	3.42493	2.74191	5.36758	2.75444	1.40831	0.00117355	2293	110092746	LOC110092746	uncharacterized LOC110092746, transcript variant X2	-	-	-	-
XM_020817424.2	48.3553	77.6987	19.0119	0.244688	-2.03099	0.0201876	0.0956945	Down	1.90972	1.10825	1.13532	6.07615e-08	1.10829	0.00133683	2237	110092757	LOC110092757	pentatricopeptide repeat-containing protein At1g55630, transcript variant X3	-	-	-	-
XM_020817428.2	136.345	70.1527	202.537	2.88709	1.52961	0.0260866	0.115254	Up	2.00198	2.04772	1.81309	6.63552	6.03782	5.70944	1432	110092756	LOC110092756	NAC domain-containing protein 2	GO:0005634,GO:0003700,GO:0043565,GO:0009793,GO:0010365,GO:0009413	nucleus|DNA-binding transcription factor activity|sequence-specific DNA binding|embryo development ending in seed dormancy|positive regulation of ethylene biosynthetic process|response to flooding	-	-
XM_020817433.2	17.9264	31.6311	4.2217	0.133466	-2.90545	0.0236646	0.1074	Down	0.982995	0.0820897	0.995196	0.0989836	0.0770129	0.133455	1826	110092767	LOC110092767	cation/H(+) antiporter 17-like	GO:0012505,GO:0016021,GO:0005770,GO:0015299,GO:0006813,GO:0006623,GO:0006885	endomembrane system|integral component of membrane|late endosome|solute:proton antiporter activity|potassium ion transport|protein targeting to vacuole|regulation of pH	-	-
XM_020817442.2	798.526	477.038	1120.01	2.34785	1.23134	0.0374776	0.149667	Up	17.7299	17.1729	19.8433	47.8	48.5313	43.5659	1040	110092775	LOC110092775	ATG8-interacting protein 2-like	GO:0005783,GO:0005789,GO:0016021,GO:0043231,GO:0006914,GO:0015031	endoplasmic reticulum|endoplasmic reticulum membrane|integral component of membrane|intracellular membrane-bounded organelle|autophagy|protein transport	-	-
XM_020817445.2	1381.11	711.822	2050.4	2.88049	1.52632	0.00947463	0.054797	Up	21.0822	19.5419	21.8806	64.4561	65.3562	66.0852	1360	110092778	LOC110092778	protein KTI12 homolog	GO:0005737,GO:0033588,GO:0005634,GO:0005524,GO:0005516,GO:0080178,GO:0006357,GO:0006400,GO:0002098	cytoplasm|Elongator holoenzyme complex|nucleus|ATP binding|calmodulin binding|5-carbamoylmethyl uridine residue modification|regulation of transcription by RNA polymerase II|tRNA modification|tRNA wobble uridine modification	-	-
XM_020817446.2	538.896	977.573	100.219	0.102518	-3.28605	4.03499e-07	1.27995e-05	Down	19.592	19.5258	19.251	2.1993	2.56534	1.72751	2000	110092779	LOC110092779	ribosome-binding ATPase YchF	GO:0005737,GO:0005829,GO:0005634,GO:0005524,GO:0016887,GO:0005525,GO:0046872,GO:0043023,GO:0043022	cytoplasm|cytosol|nucleus|ATP binding|ATPase activity|GTP binding|metal ion binding|ribosomal large subunit binding|ribosome binding	-	-
XM_020817447.2	473.304	846.969	99.6397	0.117643	-3.08752	1.75373e-06	4.67355e-05	Down	28.2627	26.009	24.7478	3.33546	2.89948	3.85159	1280	110092780	LOC110092780	C-factor	GO:0005829,GO:0005634,GO:0016491,GO:0110095	cytosol|nucleus|oxidoreductase activity|cellular detoxification of aldehyde	-	-
XM_020817450.2	26.0346	0	52.0693	Inf	Inf	8.19914e-07	2.38979e-05	Up	0	0	0	1.92752	1.62545	2.16941	1177	110092782	LOC110092782	LOB domain-containing protein 4	-	-	-	-
XM_020817451.2	60.0615	91.3948	28.7283	0.314332	-1.66964	0.0413553	0.160477	Down	1.25741	1.26827	1.12937	0.398156	0.476296	0.381077	2989	110092783	LOC110092783	pentatricopeptide repeat-containing protein At4g02750-like	-	-	-	-
XM_020817456.2	14.9494	28.3113	1.5875	0.0560732	-4.15655	0.00695514	0.0432431	Down	0.957351	1.08882	0.976273	0.0985257	0.0897104	0.0114315	1120	110092788	LOC110092788	phosphatidylinositol transfer protein 3-like, transcript variant X2	GO:0005886,GO:0005628,GO:0008526,GO:0120014,GO:0120010	plasma membrane|prospore membrane|phosphatidylinositol transfer activity|phospholipid transfer activity|intermembrane phospholipid transfer	-	-
XM_020817457.2	169.212	55.3856	283.039	5.11033	2.35342	0.000732864	0.00739656	Up	2.5394	9.4913e-08	4.05068	18.0028	10.5384	8.07088	1003	110092788	LOC110092788	phosphatidylinositol transfer protein 3-like, transcript variant X3	GO:0005886,GO:0005628,GO:0008526,GO:0120014,GO:0120010	plasma membrane|prospore membrane|phosphatidylinositol transfer activity|phospholipid transfer activity|intermembrane phospholipid transfer	-	-
XM_020817468.2	1720.15	2913.88	526.414	0.180658	-2.46867	4.27372e-05	0.000706894	Down	147.403	142.576	146.602	29.0809	27.9411	28.7852	797	110092798	LOC110092798	photosystem I reaction center subunit III, chloroplastic	GO:0009543,GO:0009538,GO:0015979	chloroplast thylakoid lumen|photosystem I reaction center|photosynthesis	path:dct00195,path:dct01100	Photosynthesis|Metabolic pathways
XM_020817474.2	6420.52	3471.27	9369.77	2.69923	1.43255	0.01294	0.06875	Up	42.3224	40.7916	41.1936	123.945	120.79	120.289	3335	110092804	LOC110092804	protein PAT1 homolog 2	GO:0000932,GO:0003729,GO:0003723,GO:0033962,GO:0000290,GO:0006397	P-body|mRNA binding|RNA binding|cytoplasmic mRNA processing body assembly|deadenylation-dependent decapping of nuclear-transcribed mRNA|mRNA processing	path:dct03018	RNA degradation
XM_020817481.2	3051.89	1494.52	4609.26	3.08412	1.62486	0.00523637	0.0349249	Up	37.2622	36.4557	33.8677	120.837	121.52	118.599	1659	110092808	LOC110092808	tubulin beta chain-like	GO:0005737,GO:0005874,GO:0005525,GO:0003924,GO:0005200,GO:0000226,GO:0007017,GO:0000278	cytoplasm|microtubule|GTP binding|GTPase activity|structural constituent of cytoskeleton|microtubule cytoskeleton organization|microtubule-based process|mitotic cell cycle	path:dct04145	Phagosome
XM_020817483.2	104.119	198.194	10.0439	0.0506769	-4.30253	1.57516e-07	5.58378e-06	Down	6.97371	6.63335	7.65006	0.295154	0.433137	0.439586	1113	110092809	LOC110092809	dihydroceramide fatty acyl 2-hydroxylase FAH1	GO:0005783,GO:0005789,GO:0016021,GO:0080132,GO:0005506,GO:0006633,GO:0006631,GO:0000038	endoplasmic reticulum|endoplasmic reticulum membrane|integral component of membrane|fatty acid alpha-hydroxylase activity|iron ion binding|fatty acid biosynthetic process|fatty acid metabolic process|very long-chain fatty acid metabolic process	-	-
XM_020817496.2	718.676	1163.57	273.784	0.235297	-2.08744	0.000599926	0.00626878	Down	43.2689	43.7122	45.4821	10.8877	11.2203	11.8146	1049	110092817	LOC110092817	ras-related protein Rab5A	GO:0030139,GO:0005768,GO:0000139,GO:0031902,GO:0009705,GO:0005886,GO:0032586,GO:0005525,GO:0003924,GO:0010256,GO:0006886,GO:0032482	endocytic vesicle|endosome|Golgi membrane|late endosome membrane|plant-type vacuole membrane|plasma membrane|protein storage vacuole membrane|GTP binding|GTPase activity|endomembrane system organization|intracellular protein transport|Rab protein signal transduction	path:dct04144,path:dct04145	Endocytosis|Phagosome
XM_020817502.2	260.309	137.791	382.826	2.7783	1.4742	0.0205008	0.0966572	Up	8.06804	8.30048	8.80814	25.2558	25.0031	25.936	653	110092823	LOC110092823	protein phosphatase 1 regulatory subunit INH3	GO:0005634,GO:0000164,GO:0008157,GO:0004865,GO:0009793,GO:0032515,GO:0035308	nucleus|protein phosphatase type 1 complex|protein phosphatase 1 binding|protein serine/threonine phosphatase inhibitor activity|embryo development ending in seed dormancy|negative regulation of phosphoprotein phosphatase activity|negative regulation of protein dephosphorylation	-	-
XM_020817506.2	5040.59	8265.6	1815.57	0.219654	-2.1867	0.000214805	0.00272385	Down	99.9037	104.014	101.015	23.7915	25.4244	23.6553	3237	110092826	LOC110092826	alpha-1,4 glucan phosphorylase L isozyme, chloroplastic/amyloplastic, transcript variant X2	GO:0009501,GO:0009507,GO:0008184,GO:0102250,GO:0030170,GO:0102499,GO:0005975	amyloplast|chloroplast|glycogen phosphorylase activity|linear malto-oligosaccharide phosphorylase activity|pyridoxal phosphate binding|SHG alpha-glucan phosphorylase activity|carbohydrate metabolic process	path:dct00500,path:dct01100,path:dct01110	Starch and sucrose metabolism|Metabolic pathways|Biosynthesis of secondary metabolites
XM_020817507.2	984.672	1543.83	425.514	0.275622	-1.85924	0.00180134	0.0152472	Down	20.1784	16.0984	20.8429	6.50987	4.48299	6.1258	3228	110092826	LOC110092826	alpha-1,4 glucan phosphorylase L isozyme, chloroplastic/amyloplastic, transcript variant X3	GO:0009501,GO:0009507,GO:0008184,GO:0102250,GO:0030170,GO:0102499,GO:0005975	amyloplast|chloroplast|glycogen phosphorylase activity|linear malto-oligosaccharide phosphorylase activity|pyridoxal phosphate binding|SHG alpha-glucan phosphorylase activity|carbohydrate metabolic process	path:dct00500,path:dct01100,path:dct01110	Starch and sucrose metabolism|Metabolic pathways|Biosynthesis of secondary metabolites
XM_020817508.2	148.733	68.6293	228.837	3.33439	1.73742	0.0123594	0.0665954	Up	1.69827	0.761843	2.32797	5.69487	4.76705	6.8886	1713	110092827	LOC110092827	centrosomal protein of 128 kDa-like, transcript variant X1	-	-	-	-
XM_020817509.2	266.612	403.571	129.652	0.321261	-1.63818	0.0106086	0.0594457	Down	10.4991	11.0396	8.4441	3.41026	4.89469	2.15998	1608	110092827	LOC110092827	centrosomal protein of 128 kDa-like, transcript variant X2	-	-	-	-
XM_020817512.2	88.4681	33.6115	143.325	4.26416	2.09226	0.00552833	0.0364372	Up	0.561882	0.802329	0.368413	2.73035	2.15948	3.13829	2318	110092829	LOC110092829	sulfite exporter TauE/SafE family protein 3, transcript variant X1	GO:0031464,GO:0016021,GO:0016567	Cul4A-RING E3 ubiquitin ligase complex|integral component of membrane|protein ubiquitination	-	-
XM_020817514.2	46.8933	82.7889	10.9976	0.132839	-2.91225	0.00155719	0.0135299	Down	5.46112	4.71702	5.07778	0.666975	0.695479	0.789891	651	114578342	LOC114578342	deoxyuridine 5'-triphosphate nucleotidohydrolase-like	GO:0004170,GO:0000287,GO:0006226,GO:0046081	dUTP diphosphatase activity|magnesium ion binding|dUMP biosynthetic process|dUTP catabolic process	path:dct00240,path:dct01100	Pyrimidine metabolism|Metabolic pathways
XM_020817515.2	20.6209	40.2988	0.94303	0.023401	-5.41729	0.000231272	0.00289253	Down	1.67708	1.0017	3.00618	0.122726	1.95139e-08	0.0145775	849	110092830	LOC110092830	deoxyuridine 5'-triphosphate nucleotidohydrolase	GO:0004170,GO:0000287,GO:0006226,GO:0046081	dUTP diphosphatase activity|magnesium ion binding|dUMP biosynthetic process|dUTP catabolic process	path:dct00240,path:dct01100	Pyrimidine metabolism|Metabolic pathways
XM_020817523.2	24.2756	3.84969	44.7015	11.6117	3.53751	0.00267613	0.0206631	Up	0.000408688	0.194801	0.0344919	0.710263	2.00038	0.365098	1888	110092833	LOC110092833	probable UDP-arabinose 4-epimerase 2, transcript variant X4	GO:0032580,GO:0016021,GO:0050373,GO:0003978,GO:0045227,GO:0006012,GO:0033358	Golgi cisterna membrane|integral component of membrane|UDP-arabinose 4-epimerase activity|UDP-glucose 4-epimerase activity|capsule polysaccharide biosynthetic process|galactose metabolic process|UDP-L-arabinose biosynthetic process	path:dct00520,path:dct01100	Amino sugar and nucleotide sugar metabolism|Metabolic pathways
XM_020817528.2	124.432	241.915	6.94885	0.0287244	-5.12158	7.37542e-10	4.67425e-08	Down	5.88894	4.91671	5.44428	0.00171559	0.0932969	0.424235	1777	110092833	LOC110092833	probable UDP-arabinose 4-epimerase 2, transcript variant X7	GO:0032580,GO:0016021,GO:0050373,GO:0003978,GO:0045227,GO:0006012,GO:0033358	Golgi cisterna membrane|integral component of membrane|UDP-arabinose 4-epimerase activity|UDP-glucose 4-epimerase activity|capsule polysaccharide biosynthetic process|galactose metabolic process|UDP-L-arabinose biosynthetic process	path:dct00520,path:dct01100	Amino sugar and nucleotide sugar metabolism|Metabolic pathways
XM_020817531.2	426.005	210.66	641.35	3.04448	1.6062	0.00907737	0.0529051	Up	3.34511	3.37631	3.80311	11.369	11.6827	11.8396	2388	110092838	LOC110092838	F-box/LRR-repeat MAX2 homolog A	-	-	-	-
XM_020817539.2	21.3708	42.4272	0.314343	0.00740901	-7.0765	2.72541e-05	0.000486605	Down	2.37519	2.17369	2.22333	0.0378626	0	0	747	110092846	LOC110092846	myb-related protein Zm1	GO:0005634,GO:0003700,GO:0043565,GO:0044212,GO:0030154	nucleus|DNA-binding transcription factor activity|sequence-specific DNA binding|transcription regulatory region DNA binding|cell differentiation	-	-
XM_020817547.2	705.618	1110	301.237	0.271385	-1.88159	0.00186162	0.0156216	Down	82.6694	80.3432	82.057	24.1759	24.7834	23.4171	541	110092853	LOC110092853	36.4 kDa proline-rich protein-like	GO:0005618,GO:0005576	cell wall|extracellular region	-	-
XM_020817549.2	13604.5	7150.32	20058.7	2.80529	1.48815	0.0097171	0.055878	Up	24.1214	24.6854	24.6669	74.3779	74.9177	74.9461	11622	110092851	LOC110092851	transformation/transcription domain-associated protein	GO:0070209,GO:0035267,GO:0005634,GO:0000124,GO:0046695,GO:0003712,GO:0006281,GO:0016573,GO:0045944,GO:0006355	ASTRA complex|NuA4 histone acetyltransferase complex|nucleus|SAGA complex|SLIK (SAGA-like) complex|transcription coregulator activity|DNA repair|histone acetylation|positive regulation of transcription by RNA polymerase II|regulation of transcription, DNA-templated	-	-
XM_020817561.2	272.996	146.891	399.101	2.71698	1.442	0.0218398	0.101345	Up	2.96918	3.78461	3.0334	11.135	7.97472	9.86919	1790	110092864	LOC110092864	ethanolamine-phosphate cytidylyltransferase-like, transcript variant X1	GO:0005794,GO:0031307,GO:0005739,GO:0004306,GO:0006646	Golgi apparatus|integral component of mitochondrial outer membrane|mitochondrion|ethanolamine-phosphate cytidylyltransferase activity|phosphatidylethanolamine biosynthetic process	path:dct00440,path:dct00564,path:dct01100	Phosphonate and phosphinate metabolism|Glycerophospholipid metabolism|Metabolic pathways
XM_020817567.2	43.7059	67.6351	19.7767	0.292404	-1.77397	0.0469412	0.175692	Down	4.34982	4.20942	4.81945	1.31339	1.0401	1.84614	605	110092873	LOC110092873	protein NDR1-like	GO:0046658,GO:0016020,GO:0005886,GO:0009506,GO:0042742,GO:0009816,GO:0009817,GO:0009814,GO:0009626,GO:0010942	anchored component of plasma membrane|membrane|plasma membrane|plasmodesma|defense response to bacterium|defense response to bacterium, incompatible interaction|defense response to fungus, incompatible interaction|defense response, incompatible interaction|plant-type hypersensitive response|positive regulation of cell death	-	-
XM_020817568.2	612.413	1102.88	121.943	0.110567	-3.17701	7.29774e-07	2.15834e-05	Down	23.4584	27.6699	22.5326	2.69525	3.00905	3.14341	1788	110092874	LOC110092874	protein ACCELERATED CELL DEATH 6-like	GO:0030176,GO:0005887,GO:0016020,GO:0008219,GO:0071446,GO:0009816,GO:1900426,GO:1902290,GO:0016567,GO:1900150,GO:2000031,GO:0009617,GO:0050826,GO:0009416,GO:0009751,GO:0009615	integral component of endoplasmic reticulum membrane|integral component of plasma membrane|membrane|cell death|cellular response to salicylic acid stimulus|defense response to bacterium, incompatible interaction|positive regulation of defense response to bacterium|positive regulation of defense response to oomycetes|protein ubiquitination|regulation of defense response to fungus|regulation of sal…	-	-
XM_020817570.2	34.8895	56.2166	13.5625	0.241255	-2.05137	0.0375587	0.149852	Down	1.28548	4.34616	2.81189	0.698717	0.794108	0.691857	796	110092876	LOC110092876	uncharacterized LOC110092876, transcript variant X1	-	-	-	-
XM_020817573.2	281.126	142.849	419.403	2.93599	1.55385	0.0139059	0.0724259	Up	4.84408	5.95904	5.91124	16.5321	19.371	17.5643	1019	110092877	LOC110092877	vacuolar protein sorting-associated protein 32 homolog 2	GO:0000815,GO:0005886,GO:0015031,GO:0007034	ESCRT III complex|plasma membrane|protein transport|vacuolar transport	path:dct04144	Endocytosis
XM_020817577.2	241.466	30.836	452.096	14.6613	3.87394	4.4024e-08	1.83183e-06	Up	0.629878	1.14065	0.963465	12.9513	14.6039	15.9801	1350	110092885	LOC110092885	probable xyloglucan endotransglucosylase/hydrolase protein 23	GO:0048046,GO:0005618,GO:0005794,GO:0004553,GO:0016762,GO:0042546,GO:0071555,GO:0010411	apoplast|cell wall|Golgi apparatus|hydrolase activity, hydrolyzing O-glycosyl compounds|xyloglucan:xyloglucosyl transferase activity|cell wall biogenesis|cell wall organization|xyloglucan metabolic process	path:dct04075	Plant hormone signal transduction
XM_020817584.2	1095.03	515.542	1674.52	3.24807	1.69958	0.0040426	0.0284737	Up	3.14175	4.33726	4.61026	15.5057	12.8322	14.3882	5091	110092893	LOC110092893	ABC transporter C family member 3, transcript variant X1	GO:0048046,GO:0016021,GO:0016020,GO:0000325,GO:0009506,GO:0005774,GO:0005773,GO:0005524,GO:0016887,GO:0015431,GO:0042626,GO:0008559,GO:0010290,GO:0055085	apoplast|integral component of membrane|membrane|plant-type vacuole|plasmodesma|vacuolar membrane|vacuole|ATP binding|ATPase activity|ATPase-coupled glutathione S-conjugate transmembrane transporter activity|ATPase-coupled transmembrane transporter activity|ATPase-coupled xenobiotic transmembrane transporter activity|chlorophyll catabolite transmembrane transporter activity|transmembrane transport	-	-
XM_020817591.2	5946.4	3147.7	8745.09	2.77825	1.47418	0.0105572	0.0592223	Up	53.5031	52.9998	49.9391	162.36	158.474	151.974	2403	110092898	LOC110092898	protein S-acyltransferase 24	GO:0030659,GO:0005768,GO:0005794,GO:0000139,GO:0016021,GO:0005802,GO:0000035,GO:0019706,GO:0009932	cytoplasmic vesicle membrane|endosome|Golgi apparatus|Golgi membrane|integral component of membrane|trans-Golgi network|acyl binding|protein-cysteine S-palmitoyltransferase activity|cell tip growth	-	-
XM_020817594.2	246.111	472.425	19.7971	0.0419052	-4.57673	4.2543e-10	2.87756e-08	Down	8.00622	8.82618	16.3041	0.286596	0.656713	0.551081	1701	110092901	LOC110092901	cold-responsive protein kinase 1, transcript variant X1	GO:0005634,GO:0005886,GO:0005524,GO:0004674,GO:0046777,GO:0009409,GO:0050826,GO:0009625,GO:0002237	nucleus|plasma membrane|ATP binding|protein serine/threonine kinase activity|protein autophosphorylation|response to cold|response to freezing|response to insect|response to molecule of bacterial origin	-	-
XM_020817604.2	397.996	619.59	176.402	0.284707	-1.81245	0.0035115	0.0256182	Down	15.9853	15.7274	16.2753	4.94166	4.82757	5.07997	1542	110092908	LOC110092908	uncharacterized LOC110092908	-	-	-	-
XM_020817606.2	836.045	1306.6	365.491	0.279727	-1.83791	0.00218195	0.0176801	Down	45.201	46.4935	42.8192	10.9158	15.5595	14.4751	1160	110092905	LOC110092905	transmembrane protein 56-B, transcript variant X1	GO:0005783,GO:0005789,GO:0016021	endoplasmic reticulum|endoplasmic reticulum membrane|integral component of membrane	-	-
XM_020817609.2	11.8838	22.8088	0.958815	0.0420371	-4.57219	0.00958858	0.0553393	Down	1.54534	1.18759	1.21522	0.0365407	0.144372	0	687	110092912	LOC110092912	probable carbohydrate esterase At4g34215	GO:0005829,GO:0016787	cytosol|hydrolase activity	-	-
XM_020817633.2	20073.1	29973.3	10172.9	0.3394	-1.55894	0.00683459	0.0426998	Down	492.642	490.915	490.1	184.497	180.325	179.316	2429	110092928	LOC110092928	heat shock protein 81-1-like	GO:0009986,GO:0005737,GO:0005829,GO:0048471,GO:0005886,GO:0032991,GO:0005524,GO:0051082,GO:0034605,GO:0006457,GO:0050821	cell surface|cytoplasm|cytosol|perinuclear region of cytoplasm|plasma membrane|protein-containing complex|ATP binding|unfolded protein binding|cellular response to heat|protein folding|protein stabilization	path:dct04141,path:dct04626	Protein processing in endoplasmic reticulum|Plant-pathogen interaction
XM_020817637.2	20.4828	37.3726	3.59301	0.0961403	-3.37871	0.00740294	0.0454626	Down	0.334587	0.636597	1.63048	0.0375653	0.0827697	0.158586	1712	110092931	LOC110092931	growth hormone-regulated TBC protein 1, transcript variant X2	GO:0005096,GO:0017137,GO:0090630,GO:0006886,GO:0016192	GTPase activator activity|Rab GTPase binding|activation of GTPase activity|intracellular protein transport|vesicle-mediated transport	-	-
XM_020817639.2	22.4133	1.6842	43.1425	25.616	4.67898	0.000452335	0.00496118	Up	0.000468334	0.0609439	0.062365	1.83292	1.0162	0.558892	1640	110092933	LOC110092933	TLD domain-containing protein 1, transcript variant X2	GO:0005739	mitochondrion	-	-
XM_020817641.2	821.751	346.83	1296.67	3.73863	1.90251	0.00151303	0.01323	Up	5.73406	7.28277	5.25318	23.486	25.4937	25.3661	2266	110092934	LOC110092934	uncharacterized LOC110092934, transcript variant X1	GO:0005829,GO:0005634,GO:0003690,GO:0008237,GO:0070628,GO:0003697,GO:0046914,GO:0008270,GO:0006281,GO:0016925	cytosol|nucleus|double-stranded DNA binding|metallopeptidase activity|proteasome binding|single-stranded DNA binding|transition metal ion binding|zinc ion binding|DNA repair|protein sumoylation	-	-
XM_020817642.2	1824.99	687.941	2962.04	4.30565	2.10623	0.000402232	0.00451251	Up	18.2265	18.3309	19.7209	87.1075	89.9978	86.4945	1460	110092932	LOC110092932	NAC domain-containing protein 68	GO:0005634,GO:0003677,GO:0006355	nucleus|DNA binding|regulation of transcription, DNA-templated	-	-
XM_020817643.2	114.674	226.38	2.96713	0.0131068	-6.25354	7.64147e-12	7.84082e-10	Down	4.8993	2.77731	4.26684	0.0191577	0.0158155	0.134511	2263	110092934	LOC110092934	uncharacterized LOC110092934, transcript variant X2	GO:0005829,GO:0005634,GO:0003690,GO:0008237,GO:0070628,GO:0003697,GO:0046914,GO:0008270,GO:0006281,GO:0016925	cytosol|nucleus|double-stranded DNA binding|metallopeptidase activity|proteasome binding|single-stranded DNA binding|transition metal ion binding|zinc ion binding|DNA repair|protein sumoylation	-	-
XM_020817654.2	14.5251	25.4972	3.55302	0.139349	-2.84322	0.0458879	0.173102	Down	0.220974	0.199308	0.220502	0.0254207	0.0459052	0.0260257	4772	110092941	LOC110092941	ARF guanine-nucleotide exchange factor GNL2, transcript variant X1	GO:0005829,GO:0016020,GO:0090406,GO:0005086,GO:0009846,GO:0015031,GO:0032012	cytosol|membrane|pollen tube|ARF guanyl-nucleotide exchange factor activity|pollen germination|protein transport|regulation of ARF protein signal transduction	path:dct04144	Endocytosis
XM_020817661.2	87.4717	131.31	43.6333	0.332292	-1.58948	0.0331157	0.136681	Down	2.74173	2.59742	2.78708	0.912359	1.0283	0.982055	1936	110092946	LOC110092946	transcription termination factor MTERF4, chloroplastic	GO:0009507,GO:0005739,GO:0009536,GO:0003690,GO:0032502,GO:0006353,GO:0009793,GO:0042794,GO:0042793,GO:0006355,GO:0008380	chloroplast|mitochondrion|plastid|double-stranded DNA binding|developmental process|DNA-templated transcription, termination|embryo development ending in seed dormancy|plastid rRNA transcription|plastid transcription|regulation of transcription, DNA-templated|RNA splicing	-	-
XM_020817679.2	1251.69	1765.26	738.113	0.418132	-1.25797	0.0308713	0.129829	Down	26.5939	23.081	24.6762	12.1275	10.0533	11.6492	2835	110092960	LOC110092960	sucrose synthase 2, transcript variant X1	GO:0016157,GO:0005985	sucrose synthase activity|sucrose metabolic process	path:dct00500,path:dct01100,path:dct01110	Starch and sucrose metabolism|Metabolic pathways|Biosynthesis of secondary metabolites
XM_020817680.2	7920.25	14194.8	1645.69	0.115936	-3.1086	3.70776e-07	1.18613e-05	Down	198.382	204.796	197.108	23.7422	27.2431	24.7161	2824	110092960	LOC110092960	sucrose synthase 2, transcript variant X2	GO:0016157,GO:0005985	sucrose synthase activity|sucrose metabolic process	path:dct00500,path:dct01100,path:dct01110	Starch and sucrose metabolism|Metabolic pathways|Biosynthesis of secondary metabolites
XM_020817685.2	2738.62	1366.37	4110.86	3.00859	1.58909	0.00638879	0.0405233	Up	37.9975	35.193	33.1934	113.148	117.761	117.308	1534	110092963	LOC110092963	ethylene-responsive transcription factor 1-like, transcript variant X2	GO:0005634,GO:0003677,GO:0003700,GO:0006952	nucleus|DNA binding|DNA-binding transcription factor activity|defense response	-	-
XM_020817694.2	277.918	500.333	55.5023	0.110931	-3.17227	2.61308e-06	6.55059e-05	Down	11.9146	12.0829	12.4503	1.54538	1.4588	1.41047	1639	110092972	LOC110092972	phosphoenolpyruvate/phosphate translocator 2, chloroplastic	GO:0031969,GO:0005794,GO:0016021,GO:0015297,GO:0015121,GO:0022857,GO:0009670,GO:0008643,GO:0015714,GO:0035436	chloroplast membrane|Golgi apparatus|integral component of membrane|antiporter activity|phosphoenolpyruvate:phosphate antiporter activity|transmembrane transporter activity|triose-phosphate:phosphate antiporter activity|carbohydrate transport|phosphoenolpyruvate transport|triose phosphate transmembrane transport	-	-
XM_020817696.2	81.3286	3.3684	159.289	47.2892	5.56344	3.52823e-09	1.88383e-07	Up	0	0.229578	0.317997	9.51158	8.93122	9.86759	730	110092973	LOC110092973	uncharacterized LOC110092973	-	-	-	-
XM_020817723.2	38.7457	77.4914	0	0	#NAME?	5.45173e-09	2.78198e-07	Down	2.63168	2.72777	2.354	9.61174e-48	0	0	1203	110092992	LOC110092992	nudix hydrolase 12, mitochondrial	GO:0005737,GO:0005739,GO:0005634,GO:0016787,GO:0046872	cytoplasm|mitochondrion|nucleus|hydrolase activity|metal ion binding	-	-
XM_020817725.2	88.8796	165.201	12.5586	0.0760204	-3.71747	5.95145e-06	0.000132013	Down	4.31894	4.53149	4.32288	0.423269	0.32441	0.304767	1496	110092994	LOC110092994	aspartyl protease AED3	GO:0048046,GO:0005618,GO:0099503,GO:0004190,GO:0000166,GO:0030163,GO:0006508,GO:0043067,GO:0009627	apoplast|cell wall|secretory vesicle|aspartic-type endopeptidase activity|nucleotide binding|protein catabolic process|proteolysis|regulation of programmed cell death|systemic acquired resistance	-	-
XM_020817729.2	45.0142	89.384	0.644472	0.00721015	-7.11576	1.94599e-08	8.76189e-07	Down	2.2438	2.2868	2.14771	0	0.0578811	1.19197e-72	1594	110092999	LOC110092999	cyclin-D2-2-like	GO:0000307,GO:0005737,GO:0005634,GO:0016538,GO:0019901,GO:0051301,GO:0044772,GO:0006468,GO:0000079	cyclin-dependent protein kinase holoenzyme complex|cytoplasm|nucleus|cyclin-dependent protein serine/threonine kinase regulator activity|protein kinase binding|cell division|mitotic cell cycle phase transition|protein phosphorylation|regulation of cyclin-dependent protein serine/threonine kinase activity	-	-
XM_020817733.2	82.7137	147.64	17.787	0.120475	-3.05319	0.000142554	0.00193451	Down	3.741	3.64524	3.80237	0.48192	0.437051	0.549761	1573	110092998	LOC110092998	cis-zeatin O-glucosyltransferase 1	GO:0043231,GO:0050502,GO:0008194,GO:0009690,GO:0006486,GO:0080036,GO:0010817	intracellular membrane-bounded organelle|cis-zeatin O-beta-D-glucosyltransferase activity|UDP-glycosyltransferase activity|cytokinin metabolic process|protein glycosylation|regulation of cytokinin-activated signaling pathway|regulation of hormone levels	path:dct00908	Zeatin biosynthesis
XM_020817737.2	1412.75	651.132	2174.37	3.33937	1.73957	0.00320178	0.0238489	Up	7.63751	8.08548	7.85709	28.0406	28.9856	28.6913	3296	110093004	LOC110093004	ubiquitin carboxyl-terminal hydrolase 17	GO:0004197,GO:0046872,GO:0004843,GO:0016579,GO:0006511	cysteine-type endopeptidase activity|metal ion binding|thiol-dependent ubiquitin-specific protease activity|protein deubiquitination|ubiquitin-dependent protein catabolic process	-	-
XM_020817740.2	440.026	700.937	179.114	0.255534	-1.96841	0.00153644	0.013392	Down	10.5949	10.7794	9.81768	2.73961	3.34602	2.56395	2685	110093005	LOC110093005	CDPK-related kinase 5, transcript variant X1	GO:0005737,GO:0005634,GO:0005886,GO:0005524,GO:0009931,GO:0005516,GO:0004683,GO:0046872,GO:0035556,GO:0018105,GO:0046777	cytoplasm|nucleus|plasma membrane|ATP binding|calcium-dependent protein serine/threonine kinase activity|calmodulin binding|calmodulin-dependent protein kinase activity|metal ion binding|intracellular signal transduction|peptidyl-serine phosphorylation|protein autophosphorylation	-	-
XM_020817744.2	13.9801	26.0184	1.94184	0.0746333	-3.74404	0.0152797	0.0774796	Down	0.432393	1.25107	0.852513	0.0822534	0.0144762	0.0978577	1239	110093007	LOC110093007	2-hydroxyisoflavanone dehydratase-like	GO:0016787,GO:0080030,GO:0009056	hydrolase activity|methyl indole-3-acetate esterase activity|catabolic process	-	-
XM_020817751.2	476.724	202.222	751.226	3.71486	1.89331	0.00205468	0.016862	Up	5.03629	6.76049	6.05627	24.0502	24.1715	24.0098	1351	110092758	LOC110092758	probable inositol oxygenase	GO:0005737,GO:0050113,GO:0005506,GO:0019310,GO:0019853	cytoplasm|inositol oxygenase activity|iron ion binding|inositol catabolic process|L-ascorbic acid biosynthetic process	path:dct00053,path:dct00562,path:dct01100	Ascorbate and aldarate metabolism|Inositol phosphate metabolism|Metabolic pathways
XM_020817757.2	632.573	931.917	333.229	0.357573	-1.48369	0.0137117	0.0717381	Down	17.0842	17.3695	14.4335	6.57565	6.62377	5.81522	2277	110093015	LOC110093015	cationic amino acid transporter 2, vacuolar	GO:0016021,GO:0009705,GO:0005774,GO:0005773,GO:0022857,GO:0080144,GO:0006865	integral component of membrane|plant-type vacuole membrane|vacuolar membrane|vacuole|transmembrane transporter activity|amino acid homeostasis|amino acid transport	-	-
XM_020817761.2	412.864	105.417	720.31	6.83294	2.77251	2.06177e-05	0.000384648	Up	0.891846	0.0851304	0.553666	4.89089	3.06111	3.42114	8225	110093019	LOC110093019	protein CHROMATIN REMODELING 4, transcript variant X2	GO:0005634,GO:0009506,GO:0005524,GO:0003677,GO:0004386,GO:0046872,GO:0006325	nucleus|plasmodesma|ATP binding|DNA binding|helicase activity|metal ion binding|chromatin organization	-	-
XM_020817763.2	426.22	95.4265	757.013	7.93294	2.98786	5.16838e-06	0.000116965	Up	0.819059	0.0791275	0.490869	5.06785	3.02945	3.86626	8217	110093019	LOC110093019	protein CHROMATIN REMODELING 4, transcript variant X3	GO:0005634,GO:0009506,GO:0005524,GO:0003677,GO:0004386,GO:0046872,GO:0006325	nucleus|plasmodesma|ATP binding|DNA binding|helicase activity|metal ion binding|chromatin organization	-	-
XM_020817767.2	27.2713	7.31672	47.2259	6.45451	2.69031	0.0145143	0.0746805	Up	0.0108322	0.0793896	0.193081	1.26677e-05	0.956618	1.13105	2944	110093021	LOC110093021	potassium transporter 11, transcript variant X1	GO:0016021,GO:0015079,GO:0006813	integral component of membrane|potassium ion transmembrane transporter activity|potassium ion transport	-	-
XM_020817771.2	35.2605	5.61644	64.9045	11.5562	3.53059	0.000624193	0.00648561	Up	0.0380344	0.275642	0.000308577	0.907379	0.787931	2.1651	2191	110093021	LOC110093021	potassium transporter 11, transcript variant X3	GO:0016021,GO:0015079,GO:0006813	integral component of membrane|potassium ion transmembrane transporter activity|potassium ion transport	-	-
XM_020817779.2	120.579	7.075	234.083	33.0859	5.04815	1.55518e-09	9.16313e-08	Up	0.0700486	0.21048	0.174558	5.51778	5.24798	5.33569	1890	110093030	LOC110093030	organic cation/carnitine transporter 4	GO:0009535,GO:0016021,GO:0009705,GO:0005524,GO:0022857,GO:0042631,GO:0006811	chloroplast thylakoid membrane|integral component of membrane|plant-type vacuole membrane|ATP binding|transmembrane transporter activity|cellular response to water deprivation|ion transport	-	-
XM_020817784.2	2016.39	3285.3	747.466	0.227518	-2.13595	0.000315638	0.00372093	Down	50.5344	47.654	52.3114	10.1914	13.2453	13.8241	2607	110093012	LOC110093012	GPI mannosyltransferase 2-like	GO:0005789,GO:0016021,GO:0004584,GO:0006506	endoplasmic reticulum membrane|integral component of membrane|dolichyl-phosphate-mannose-glycolipid alpha-mannosyltransferase activity|GPI anchor biosynthetic process	path:dct00563,path:dct01100	Glycosylphosphatidylinositol (GPI)-anchor biosynthesis|Metabolic pathways
XM_020817788.2	331.962	172.644	491.28	2.84563	1.50875	0.0159534	0.0800907	Up	16.3184	9.94392	10.7095	47.7593	34.7569	31.8441	558	110093039	LOC110093039	putative UDP-rhamnose:rhamnosyltransferase 1	GO:0016021,GO:0016758	integral component of membrane|transferase activity, transferring hexosyl groups	-	-
XM_020817789.2	18.0529	5.01764	31.0882	6.19577	2.63128	0.0400263	0.156811	Up	0.219436	0.229667	0.101802	1.02435	1.21543	1.34299	1123	110093040	LOC110093040	MADS-box transcription factor 16	GO:0005634,GO:0003700,GO:0046983,GO:0000977,GO:0043565,GO:0008134,GO:0044212,GO:0030154,GO:0007275,GO:0045944,GO:0010097	nucleus|DNA-binding transcription factor activity|protein dimerization activity|RNA polymerase II regulatory region sequence-specific DNA binding|sequence-specific DNA binding|transcription factor binding|transcription regulatory region DNA binding|cell differentiation|multicellular organism development|positive regulation of transcription by RNA polymerase II|specification of stamen identity	-	-
XM_020817794.2	735.44	11.4508	1459.43	127.452	6.99381	2.01695e-19	1.10628e-16	Up	0.771232	0.323505	0.730672	83.6835	85.7821	87.1076	739	110093044	LOC110093044	ribulose bisphosphate carboxylase small chain clone 512	GO:0009507,GO:0004497,GO:0016984,GO:0009853,GO:0019253	chloroplast|monooxygenase activity|ribulose-bisphosphate carboxylase activity|photorespiration|reductive pentose-phosphate cycle	path:dct00630,path:dct00710,path:dct01100,path:dct01110,path:dct01200	Glyoxylate and dicarboxylate metabolism|Carbon fixation in photosynthetic organisms|Metabolic pathways|Biosynthesis of secondary metabolites|Carbon metabolism
XM_020817799.2	433.062	830.533	35.5898	0.0428518	-4.5445	7.58271e-11	6.09994e-09	Down	22.8342	21.2679	21.3368	0.95891	0.932881	1.13288	1516	110093048	LOC110093048	probable receptor-like serine/threonine-protein kinase At5g57670	-	-	-	-
XM_020817809.2	124.932	52.6095	197.254	3.74941	1.90666	0.00789572	0.0476952	Up	1.21808	0.522214	1.31294	2.02153	6.24417	4.22239	2051	110093054	LOC110093054	E3 ubiquitin-protein ligase MBR2, transcript variant X3	GO:0046872,GO:0061630,GO:0009908,GO:0043161,GO:0040008,GO:0010228	metal ion binding|ubiquitin protein ligase activity|flower development|proteasome-mediated ubiquitin-dependent protein catabolic process|regulation of growth|vegetative to reproductive phase transition of meristem	-	-
XM_020817810.2	259.601	380.925	138.276	0.363001	-1.46195	0.0233342	0.106252	Down	10.8606	10.5304	0.81854	2.97018	4.00325	1.78366	2050	110093054	LOC110093054	E3 ubiquitin-protein ligase MBR2, transcript variant X1	GO:0046872,GO:0061630,GO:0009908,GO:0043161,GO:0040008,GO:0010228	metal ion binding|ubiquitin protein ligase activity|flower development|proteasome-mediated ubiquitin-dependent protein catabolic process|regulation of growth|vegetative to reproductive phase transition of meristem	-	-
XM_020817811.2	405.076	699.476	110.675	0.158226	-2.65994	3.22153e-05	0.000556531	Down	27.317	26.7369	27.821	3.96066	5.17732	4.97478	1020	110093052	LOC110093052	MADS-box transcription factor 50-like	GO:0005634,GO:0003700,GO:0046983,GO:0000977,GO:0043565,GO:0008134,GO:0044212,GO:0030154,GO:0009908,GO:0007275,GO:0045944	nucleus|DNA-binding transcription factor activity|protein dimerization activity|RNA polymerase II regulatory region sequence-specific DNA binding|sequence-specific DNA binding|transcription factor binding|transcription regulatory region DNA binding|cell differentiation|flower development|multicellular organism development|positive regulation of transcription by RNA polymerase II	-	-
XM_020817817.2	36.8207	59.5329	14.1084	0.236985	-2.07713	0.0308496	0.129786	Down	2.41292	2.97639	3.32399	0.838094	1.06423	0.32178	816	110093055	LOC110093055	flowering-promoting factor 1-like protein 3	GO:0009909	regulation of flower development	-	-
XM_020817818.2	327.242	174.236	480.249	2.75632	1.46274	0.0193504	0.092805	Up	7.64499	6.54917	6.61974	19.6345	21.6761	21.1619	999	110093056	LOC110093056	uncharacterized LOC110093056	-	-	-	-
XM_020817823.2	1793.26	813.353	2773.17	3.40956	1.76958	0.00266156	0.0205822	Up	40.7474	39.8773	41.0922	147.384	150.591	153.559	798	110093060	LOC110093060	NHP2-like protein 1	GO:0031428,GO:0005730,GO:0032040,GO:0005681,GO:0046540,GO:0003723,GO:0000470,GO:0030490,GO:0045292,GO:0000398	box C/D snoRNP complex|nucleolus|small-subunit processome|spliceosomal complex|U4/U6 x U5 tri-snRNP complex|RNA binding|maturation of LSU-rRNA|maturation of SSU-rRNA|mRNA cis splicing, via spliceosome|mRNA splicing, via spliceosome	path:dct03008,path:dct03040	Ribosome biogenesis in eukaryotes|Spliceosome
XM_020817824.2	136.995	215.011	58.9794	0.274308	-1.86613	0.00707444	0.043818	Down	6.48052	5.76397	6.20442	1.33895	2.15055	2.03778	1390	110093061	LOC110093061	uncharacterized LOC110093061	-	-	-	-
XM_020817827.2	1041.6	1799.12	284.084	0.157902	-2.6629	1.55138e-05	0.000303703	Down	26.4995	29.3374	24.1713	4.51841	5.37775	3.84743	2686	110093063	LOC110093063	uncharacterized LOC110093063, transcript variant X1	-	-	-	-
XM_020817828.2	352.898	697.632	8.16396	0.0117024	-6.41705	3.71969e-16	9.75755e-14	Down	10.5359	9.55732	10.1343	0.124433	0.0138729	0.247134	2757	110093063	LOC110093063	uncharacterized LOC110093063, transcript variant X2	-	-	-	-
XM_020817829.2	410.87	800.947	20.7929	0.0259604	-5.26754	5.09926e-13	6.71744e-11	Down	12.2026	8.99421	15.0285	0.635587	0.134415	0.259546	2641	110093063	LOC110093063	uncharacterized LOC110093063, transcript variant X3	-	-	-	-
XM_020817837.2	627.399	377.528	877.269	2.32372	1.21643	0.0416714	0.161291	Up	7.60378	7.53558	7.39928	18.5721	18.3054	20.1037	2000	110093070	LOC110093070	calcium-dependent protein kinase 1	GO:0005737,GO:0016020,GO:0005634,GO:0005524,GO:0005509,GO:0009931,GO:0005516,GO:0004683,GO:0035556,GO:0018105,GO:0046777	cytoplasm|membrane|nucleus|ATP binding|calcium ion binding|calcium-dependent protein serine/threonine kinase activity|calmodulin binding|calmodulin-dependent protein kinase activity|intracellular signal transduction|peptidyl-serine phosphorylation|protein autophosphorylation	path:dct04626	Plant-pathogen interaction
XM_020817841.2	36784	5803.57	67764.5	11.6763	3.54552	1.19162e-08	5.60807e-07	Up	113.057	112.444	114.578	1415.59	1454.87	1449.71	2038	110093075	LOC110093075	FRIGIDA-like protein 4b	GO:0030154,GO:0009908	cell differentiation|flower development	-	-
XM_020817844.2	396.365	597.218	195.512	0.327372	-1.611	0.00911681	0.053094	Down	29.8975	28.2382	28.0048	10.7158	10.3698	9.56674	828	110093078	LOC110093078	nuclear nucleic acid-binding protein C1D	-	-	path:dct03018	RNA degradation
XM_020817853.2	1795.2	2618.13	972.273	0.371362	-1.4291	0.0143792	0.0741538	Down	78.3884	82.9165	79.1994	33.1557	33.6703	30.3307	1300	110093084	LOC110093084	zinc finger CCCH domain-containing protein 14-like	GO:0003677,GO:0046872,GO:0003723	DNA binding|metal ion binding|RNA binding	-	-
XM_020817862.2	2823.3	4149.94	1496.66	0.360646	-1.47134	0.0111627	0.0617429	Down	168.775	169.856	177.594	68.6357	65.5217	68.3631	960	110093086	LOC110093086	40S ribosomal protein S5	GO:0015935,GO:0003723,GO:0003735,GO:0006412	small ribosomal subunit|RNA binding|structural constituent of ribosome|translation	path:dct03010	Ribosome
XM_020817877.2	30.9695	57.1055	4.83354	0.0846422	-3.56248	0.00101468	0.00959554	Down	2.2482	0.252471	1.37642	1.50558e-05	0.359181	1.01657e-05	1759	110093091	LOC110093091	AT-hook motif nuclear-localized protein 10, transcript variant X3	GO:0005829,GO:0005634,GO:0003680	cytosol|nucleus|AT DNA binding	-	-
XM_020817879.2	7311.54	4486.1	10137	2.25964	1.17609	0.0399626	0.156647	Up	225.826	218.044	218.355	550.68	537.498	539.782	809	110093092	LOC110093092	eukaryotic translation initiation factor 5A	GO:0043022,GO:0003746,GO:0003743,GO:0045901,GO:0045905,GO:0006452	ribosome binding|translation elongation factor activity|translation initiation factor activity|positive regulation of translational elongation|positive regulation of translational termination|translational frameshifting	-	-
XM_020817880.2	182.554	24.2117	340.896	14.0798	3.81555	1.7775e-07	6.24237e-06	Up	1.1622	1.06706	1.13489	17.8994	16.4964	16.9575	863	110093093	LOC110093093	phosphatidyl-N-methylethanolamine N-methyltransferase	GO:0005789,GO:0016021,GO:0043231,GO:0080101,GO:0000773,GO:0004608,GO:0006656,GO:0008654	endoplasmic reticulum membrane|integral component of membrane|intracellular membrane-bounded organelle|phosphatidyl-N-dimethylethanolamine N-methyltransferase activity|phosphatidyl-N-methylethanolamine N-methyltransferase activity|phosphatidylethanolamine N-methyltransferase activity|phosphatidylcholine biosynthetic process|phospholipid biosynthetic process	path:dct00564,path:dct01100,path:dct01110	Glycerophospholipid metabolism|Metabolic pathways|Biosynthesis of secondary metabolites
XM_020817911.2	1651.38	1002.05	2300.71	2.29602	1.19913	0.0384717	0.152387	Up	38.7543	39.9004	35.7526	97.6446	92.8569	95.266	1046	110093121	LOC110093121	cyclin-C1-1	GO:0016592,GO:0005634,GO:0016538,GO:0007049,GO:0051301,GO:0045944,GO:0006357	mediator complex|nucleus|cyclin-dependent protein serine/threonine kinase regulator activity|cell cycle|cell division|positive regulation of transcription by RNA polymerase II|regulation of transcription by RNA polymerase II	-	-
XM_020817912.2	315.434	90.1582	540.71	5.99734	2.58432	7.02525e-05	0.00106949	Up	2.96451	3.16296	2.77841	19.0157	19.7857	19.2747	1210	110093122	LOC110093122	FHA domain-containing protein FHA2	GO:0005634,GO:0048638,GO:0080086	nucleus|regulation of developmental growth|stamen filament development	-	-
XM_020817913.2	356.819	132.82	580.818	4.37297	2.12861	0.000770863	0.00769256	Up	4.21384	3.92977	3.46315	18.6278	18.5817	17.9433	1368	110093123	LOC110093123	transcription termination factor MTERF4, chloroplastic	GO:0009507,GO:0003690,GO:0009658,GO:0032502,GO:0006353,GO:0006355,GO:0009651,GO:0048364,GO:0048367	chloroplast|double-stranded DNA binding|chloroplast organization|developmental process|DNA-templated transcription, termination|regulation of transcription, DNA-templated|response to salt stress|root development|shoot system development	-	-
XM_020817916.2	469.913	662.406	277.42	0.418806	-1.25564	0.0380233	0.151206	Down	30.8266	31.0495	29.4943	13.2452	13.5366	14.8551	866	110093127	LOC110093127	rubredoxin	-	-	-	-
XM_020817935.2	1268.4	587.882	1948.92	3.31515	1.72907	0.00348769	0.0255	Up	12.9662	13.0064	13.4697	47.6544	45.9954	48.5416	1781	110093140	LOC110093140	F-box protein At5g46170	GO:0010286	heat acclimation	-	-
XM_020817936.2	269.168	454.052	84.2831	0.185624	-2.42954	0.000205217	0.00262099	Down	10.8903	9.69369	9.93076	1.90141	2.35771	1.91452	1777	110093141	LOC110093141	SUN domain-containing protein 1, transcript variant X1	GO:0005623,GO:0005856,GO:0005783,GO:0005789,GO:0016021,GO:0005635,GO:0005637,GO:0009524,GO:0043495,GO:0043621,GO:0070197,GO:0006998,GO:0006997,GO:0051291,GO:0051260,GO:0090435,GO:2000769	cell|cytoskeleton|endoplasmic reticulum|endoplasmic reticulum membrane|integral component of membrane|nuclear envelope|nuclear inner membrane|phragmoplast|protein membrane anchor|protein self-association|meiotic attachment of telomere to nuclear envelope|nuclear envelope organization|nucleus organization|protein heterooligomerization|protein homooligomerization|protein localization to nuclear env…	-	-
XM_020817942.2	88.8932	4.26905	173.517	40.6454	5.34502	4.66406e-09	2.41339e-07	Up	0.0898023	0.0423246	0.0349531	2.24335	2.83216	2.4097	3009	110093146	LOC110093146	G-type lectin S-receptor-like serine/threonine-protein kinase B120, transcript variant X1	-	-	-	-
XM_020817951.2	782.97	250.461	1315.48	5.25222	2.39293	9.86748e-05	0.00143043	Up	4.57801	4.089	4.40145	25.4327	25.0249	24.1714	2290	110093152	LOC110093152	zinc finger CCCH domain-containing protein 33	GO:0003677,GO:0046872	DNA binding|metal ion binding	-	-
XM_020817954.2	1106.61	1895.06	318.17	0.167895	-2.57437	2.62334e-05	0.000472749	Down	21.1886	23.9356	24.4842	4.46833	4.16568	4.07379	3251	110093156	LOC110093156	receptor-like protein kinase HSL1	GO:0016021,GO:0005886,GO:0005524,GO:0004674,GO:0050829,GO:0010102,GO:0060866,GO:0010468	integral component of membrane|plasma membrane|ATP binding|protein serine/threonine kinase activity|defense response to Gram-negative bacterium|lateral root morphogenesis|leaf abscission|regulation of gene expression	-	-
XM_020817960.2	441.864	244.596	639.132	2.61302	1.38572	0.0234321	0.106634	Up	2.8254	2.78144	2.39531	5.83253	8.24014	8.6699	3653	110093161	LOC110093161	putative disease resistance protein RGA4	GO:0043531,GO:0005524,GO:0006952	ADP binding|ATP binding|defense response	-	-
XM_020817962.2	330.018	488.433	171.604	0.351335	-1.50908	0.0155541	0.0785046	Down	15.3984	15.0645	17.0956	6.10989	6.69931	5.37913	1226	110093164	LOC110093164	nudix hydrolase 14, chloroplastic	GO:0009507,GO:0009570,GO:0080042,GO:0080041,GO:0019144,GO:0046872,GO:0006753,GO:0019693	chloroplast|chloroplast stroma|ADP-glucose pyrophosphohydrolase activity|ADP-ribose pyrophosphohydrolase activity|ADP-sugar diphosphatase activity|metal ion binding|nucleoside phosphate metabolic process|ribose phosphate metabolic process	path:dct00051,path:dct00230,path:dct00500,path:dct01100,path:dct01110	Fructose and mannose metabolism|Purine metabolism|Starch and sucrose metabolism|Metabolic pathways|Biosynthesis of secondary metabolites
XM_020817965.2	2549.66	1463.13	3636.2	2.48522	1.31338	0.0233157	0.106223	Up	15.0604	14.4659	14.3911	38.8349	39.1035	40.7984	3979	110093163	LOC110093163	DNA-directed RNA polymerase III subunit 2	GO:0005666,GO:0003677,GO:0003899,GO:0046872,GO:0032549,GO:0009561,GO:0006383	RNA polymerase III complex|DNA binding|DNA-directed 5'-3' RNA polymerase activity|metal ion binding|ribonucleoside binding|megagametogenesis|transcription by RNA polymerase III	path:dct03020	RNA polymerase
XM_020817967.2	17.9726	32.0591	3.88595	0.121212	-3.0444	0.0219009	0.101472	Down	0.193957	0.780716	0.348671	0.0446697	0.0657504	0.0531124	2906	110093167	LOC110093167	ferric reduction oxidase 2, transcript variant X2	GO:0016021,GO:0005886,GO:0000293,GO:0046872,GO:0006811,GO:0055072,GO:0055114,GO:0009617	integral component of membrane|plasma membrane|ferric-chelate reductase activity|metal ion binding|ion transport|iron ion homeostasis|oxidation-reduction process|response to bacterium	-	-
XM_020817970.2	117.546	206.813	28.2793	0.136738	-2.87051	0.000142636	0.00193476	Down	1.31225	5.20732	2.23564	0.589551	0.35082	0.35308	2819	110093167	LOC110093167	ferric reduction oxidase 2, transcript variant X5	GO:0016021,GO:0005886,GO:0000293,GO:0046872,GO:0006811,GO:0055072,GO:0055114,GO:0009617	integral component of membrane|plasma membrane|ferric-chelate reductase activity|metal ion binding|ion transport|iron ion homeostasis|oxidation-reduction process|response to bacterium	-	-
XM_020817980.2	193.675	377.355	9.99493	0.0264868	-5.23858	2.61527e-11	2.33417e-09	Down	7.94843	8.26747	10.2679	0.0530057	0.662581	0.0571098	1701	110093174	LOC110093174	cytochrome P450 704C1-like	GO:0016021,GO:0020037,GO:0005506,GO:0004497,GO:0016705	integral component of membrane|heme binding|iron ion binding|monooxygenase activity|oxidoreductase activity, acting on paired donors, with incorporation or reduction of molecular oxygen	-	-
XM_020817982.2	142.29	240.517	44.0636	0.183203	-2.44848	0.000512148	0.00548844	Down	2.75095	2.10701	1.99426	0.499443	0.244649	0.62009	4193	110093175	LOC110093175	cytochrome P450 704C1-like	GO:0016021,GO:0020037,GO:0005506,GO:0004497,GO:0016705	integral component of membrane|heme binding|iron ion binding|monooxygenase activity|oxidoreductase activity, acting on paired donors, with incorporation or reduction of molecular oxygen	-	-
XM_020817992.2	303.064	103.796	502.332	4.83959	2.27488	0.000420364	0.00466733	Up	0.756106	0.730802	0.811203	3.91581	4.39641	3.78025	5396	110093181	LOC110093181	uncharacterized LOC110093181, transcript variant X1	-	-	-	-
XM_020817998.2	448.489	159.087	737.891	4.63829	2.21359	0.000400874	0.00450229	Up	9.32218	9.24296	8.90913	48.5849	44.3712	45.5723	692	110093179	LOC110093179	dormancy-associated protein homolog 3, transcript variant X2	-	-	-	-
XM_020818002.2	647.912	297.393	998.431	3.35727	1.74729	0.00378291	0.0270232	Up	6.61617	7.33738	6.99545	25.7238	26.3807	24.4122	1695	110093189	LOC110093189	uncharacterized LOC110093189	-	-	-	-
XM_020818006.1	73.2581	26.7419	119.774	4.4789	2.16315	0.00656546	0.0413833	Up	0.428461	0.290588	0.266053	1.52074	1.77192	1.46794	3267	110093194	LOC110093194	protein tesmin/TSO1-like CXC 6	GO:0005634,GO:0003700,GO:0046872,GO:0000977,GO:0007275,GO:0006355	nucleus|DNA-binding transcription factor activity|metal ion binding|RNA polymerase II regulatory region sequence-specific DNA binding|multicellular organism development|regulation of transcription, DNA-templated	-	-
XM_020818009.2	42.8663	12.641	73.0916	5.78209	2.53159	0.00753494	0.0460414	Up	0.021132	6.72713e-07	0.5435	0.756855	0.816688	1.97374	2680	110093195	LOC110093195	proteinaceous RNase P 1, chloroplastic/mitochondrial, transcript variant X2	-	-	path:dct03013	RNA transport
XM_020818013.2	93.3799	138.453	48.3073	0.348909	-1.51908	0.0383506	0.152126	Down	1.30854	1.25519	1.17343	0.370122	0.487349	0.560767	4429	110093198	LOC110093198	putative E3 ubiquitin-protein ligase LIN-1	GO:0004842,GO:0009877	ubiquitin-protein transferase activity|nodulation	-	-
XM_020818021.2	466.842	91.437	842.246	9.21122	3.20339	9.10331e-07	2.63268e-05	Up	2.49804	1.57891	1.29765	18.7926	16.5344	18.4693	2034	110093205	LOC110093205	uncharacterized acetyltransferase At3g50280-like	GO:0005737,GO:0005829,GO:0016747,GO:0010143,GO:0051179,GO:0090626,GO:0010090	cytoplasm|cytosol|transferase activity, transferring acyl groups other than amino-acyl groups|cutin biosynthetic process|localization|plant epidermis morphogenesis|trichome morphogenesis	-	-
XM_020818023.2	1679.03	3253.28	104.777	0.0322067	-4.95649	2.41078e-13	3.53039e-11	Down	204.504	211.741	213.455	7.28964	6.67718	8.19103	617	110093207	LOC110093207	uncharacterized LOC110093207	-	-	-	-
XM_020818025.2	205.85	410.39	1.31034	0.00319293	-8.29091	5.46463e-18	1.98616e-15	Down	22.9585	21.3849	20.7443	0	0.112293	0.116062	753	110093210	LOC110093210	fasciclin-like arabinogalactan protein 6	GO:0031225,GO:0005886,GO:0009834	anchored component of membrane|plasma membrane|plant-type secondary cell wall biogenesis	-	-
XM_020818042.2	1459.79	702.981	2216.6	3.15315	1.65679	0.00493004	0.0333314	Up	10.1115	9.62267	10.4249	35.1907	33.6311	34.6123	2784	110093226	LOC110093226	uncharacterized LOC110093226	GO:0005623,GO:0000775,GO:0000778,GO:0000776,GO:0005634,GO:0019237,GO:0051315,GO:0051455,GO:0051301,GO:0051382	cell|chromosome, centromeric region|condensed nuclear chromosome kinetochore|kinetochore|nucleus|centromeric DNA binding|attachment of mitotic spindle microtubules to kinetochore|attachment of spindle microtubules to kinetochore involved in homologous chromosome segregation|cell division|kinetochore assembly	-	-
XM_020818046.2	4756.64	1162.48	8350.79	7.18357	2.8447	2.78868e-06	6.92396e-05	Up	63.5199	56.7219	57.0345	435.779	465.415	484.63	783	110093230	LOC110093230	glutaredoxin	GO:0005623,GO:0005737,GO:0009055,GO:0004362,GO:0015035,GO:0045454,GO:0034599	cell|cytoplasm|electron transfer activity|glutathione-disulfide reductase activity|protein disulfide oxidoreductase activity|cell redox homeostasis|cellular response to oxidative stress	-	-
XM_020818047.2	56.9781	6.50672	107.45	16.5136	4.04558	1.24932e-05	0.000250087	Up	0.00102493	0.308931	0.215094	2.56725	3.51069	3.27546	1495	110093231	LOC110093231	BOI-related E3 ubiquitin-protein ligase 1, transcript variant X1	GO:0046872,GO:0004842,GO:0006952,GO:0043161,GO:0043067	metal ion binding|ubiquitin-protein transferase activity|defense response|proteasome-mediated ubiquitin-dependent protein catabolic process|regulation of programmed cell death	-	-
XM_020818056.2	8.25136	0.318454	16.1843	50.8214	5.66736	0.017057	0.0842157	Up	0.00981882	0.00544969	0.0049687	0.243972	0.0578985	0.269265	3666	110093235	LOC110093235	kinesin-like protein KIN-8A, transcript variant X2	GO:0005871,GO:0005874,GO:0005524,GO:0008574,GO:0016887,GO:0008017,GO:0003777,GO:0007018	kinesin complex|microtubule|ATP binding|ATP-dependent microtubule motor activity, plus-end-directed|ATPase activity|microtubule binding|microtubule motor activity|microtubule-based movement	-	-
XM_020818060.2	70.5363	31.3806	109.692	3.49554	1.80552	0.0226487	0.103931	Up	1.21452	0.774769	0.549257	3.49309	3.00237	3.09237	1486	110093237	LOC110093237	E3 ubiquitin-protein ligase BOI, transcript variant X2	GO:0005634,GO:0046872,GO:0004842,GO:0006952,GO:0043161,GO:0043067	nucleus|metal ion binding|ubiquitin-protein transferase activity|defense response|proteasome-mediated ubiquitin-dependent protein catabolic process|regulation of programmed cell death	-	-
XM_020818065.2	4.87279	9.74557	0	0	#NAME?	0.0463401	0.174242	Down	0.974772	0.204843	0.0471168	2.31582e-05	0.00927566	1.73265e-17	950	110093162	LOC110093162	protein ELF4-LIKE 4, transcript variant X2	GO:0005634,GO:0042803,GO:0009649,GO:0009648,GO:0042753,GO:0048511	nucleus|protein homodimerization activity|entrainment of circadian clock|photoperiodism|positive regulation of circadian rhythm|rhythmic process	-	-
XM_020818070.2	32.0761	4.64221	59.51	12.8193	3.68025	0.000753742	0.00757241	Up	0.235324	0.257492	0.356629	3.55609	4.48008	4.16695	635	110093244	LOC110093244	putative calcium-binding protein CML19	GO:0005509	calcium ion binding	-	-
XM_020818081.2	1906	1095.13	2716.87	2.48086	1.31084	0.0239337	0.108358	Up	13.8481	13.8225	14.1306	37.2025	39.5429	36.0598	3129	110093251	LOC110093251	potassium transporter 6, transcript variant X2	GO:0016021,GO:0005886,GO:0015079,GO:0006813	integral component of membrane|plasma membrane|potassium ion transmembrane transporter activity|potassium ion transport	-	-
XM_020818087.2	1140.48	347.259	1933.69	5.56843	2.47727	4.64667e-05	0.000756481	Up	10.5624	11.6032	10.9141	68.8234	68.319	63.3375	1253	110093258	LOC110093258	SNF1-related protein kinase regulatory subunit beta-1, transcript variant X1	GO:0005886,GO:0005524,GO:0005975,GO:0006633,GO:0042128	plasma membrane|ATP binding|carbohydrate metabolic process|fatty acid biosynthetic process|nitrate assimilation	-	-
XM_020818099.2	67.9066	15.8374	119.976	7.5755	2.92134	0.00048851	0.00527258	Up	0.247097	0.187953	0.249214	2.08813	1.83666	1.79802	2722	110093267	LOC110093267	nitrate regulatory gene2 protein, transcript variant X1	GO:0005634,GO:0071249	nucleus|cellular response to nitrate	-	-
XM_020818102.2	14.2512	2.68261	25.8198	9.62486	3.26677	0.0264731	0.116552	Up	0.0171156	0.045689	0.0530046	0.392083	0.494739	0.368778	2650	110093267	LOC110093267	nitrate regulatory gene2 protein, transcript variant X2	GO:0005634,GO:0071249	nucleus|cellular response to nitrate	-	-
XM_020818107.2	292.761	504.158	81.3633	0.161385	-2.63143	5.88454e-05	0.000919787	Down	15.9504	17.4479	16.7728	2.20493	3.25774	3.35056	1200	110093270	LOC110093270	uncharacterized LOC110093270	-	-	-	-
XM_020818112.2	3369.44	6718.37	20.5035	0.00305185	-8.3561	2.7041e-26	5.82676e-23	Down	405.22	416.496	395.78	0.927657	1.13809	1.94493	659	110093272	LOC110093272	EG45-like domain containing protein	GO:0005576	extracellular region	-	-
XM_020818121.2	5.19947	10.3989	0	0	#NAME?	0.0374984	0.149676	Down	0.290861	0.0805663	0.9648	9.2985e-06	0.00137559	6.97805e-18	912	110093162	LOC110093162	protein ELF4-LIKE 4, transcript variant X3	GO:0005634,GO:0042803,GO:0009649,GO:0009648,GO:0042753,GO:0048511	nucleus|protein homodimerization activity|entrainment of circadian clock|photoperiodism|positive regulation of circadian rhythm|rhythmic process	-	-
XM_020818133.2	172.596	68.9685	276.223	4.00506	2.00183	0.00306563	0.0230224	Up	1.90477	2.44397	2.40839	9.10164	9.69914	10.603	1220	110093296	LOC110093296	uncharacterized LOC110093296	-	-	-	-
XM_020818136.2	481.598	262.464	700.731	2.66982	1.41674	0.0200423	0.0952411	Up	3.20397	2.78746	3.2719	8.99297	9.04746	8.84174	3386	110093298	LOC110093298	WPP domain-associated protein, transcript variant X1	GO:0005794,GO:0005739	Golgi apparatus|mitochondrion	-	-
XM_020818137.2	1660.15	2818.86	501.44	0.177887	-2.49097	3.75827e-05	0.00063162	Down	147.902	142.187	138.733	28.8771	26.1868	27.8972	785	110093299	LOC110093299	50S ribosomal protein L24, chloroplastic	GO:0009507,GO:0022625,GO:0019843,GO:0003735,GO:0006412	chloroplast|cytosolic large ribosomal subunit|rRNA binding|structural constituent of ribosome|translation	path:dct03010	Ribosome
XM_020818145.2	266.231	395.126	137.337	0.347577	-1.5246	0.0167475	0.0830685	Down	5.06698	5.10455	5.71557	2.34639	2.17545	1.49262	2970	110093304	LOC110093304	myosin-binding protein 2, transcript variant X1	GO:0016021,GO:0017022	integral component of membrane|myosin binding	-	-
XM_020818146.2	98.8386	155.17	42.5076	0.273943	-1.86805	0.0106639	0.0596398	Down	3.52086	2.12716	0.600001	0.610517	0.381581	0.878893	2967	110093304	LOC110093304	myosin-binding protein 2, transcript variant X2	GO:0016021,GO:0017022	integral component of membrane|myosin binding	-	-
XM_020818151.2	673.76	345.18	1002.34	2.90382	1.53795	0.010252	0.0580795	Up	10.1897	10.4811	9.07375	30.7215	32.0078	31.2942	1385	110093309	LOC110093309	uncharacterized LOC110093309	-	-	-	-
XM_020818166.2	52.6298	99.4075	5.852	0.0588688	-4.08635	1.78695e-05	0.000341615	Down	2.32628	2.25816	2.76585	0.179834	0.023689	0.257761	1614	110093320	LOC110093320	ubiquitin receptor RAD23d, transcript variant X3	GO:0005737,GO:0005829,GO:0005654,GO:0005634,GO:0009536,GO:0000502,GO:0003684,GO:0031593,GO:0070628,GO:0043130,GO:0006289,GO:0043161,GO:0009409	cytoplasm|cytosol|nucleoplasm|nucleus|plastid|proteasome complex|damaged DNA binding|polyubiquitin modification-dependent protein binding|proteasome binding|ubiquitin binding|nucleotide-excision repair|proteasome-mediated ubiquitin-dependent protein catabolic process|response to cold	path:dct03420,path:dct04141	Nucleotide excision repair|Protein processing in endoplasmic reticulum
XM_020818167.2	1627.97	182.471	3073.46	16.8435	4.07412	3.33903e-10	2.32629e-08	Up	5.35651	6.15288	5.58623	106.788	105.337	101.292	1274	110093322	LOC110093322	homeobox-leucine zipper protein HOX6-like	GO:0005634,GO:0003700,GO:0043565,GO:0045893	nucleus|DNA-binding transcription factor activity|sequence-specific DNA binding|positive regulation of transcription, DNA-templated	-	-
XM_020818169.2	222.22	98.2783	346.162	3.52226	1.8165	0.00525768	0.0350361	Up	1.43766	1.81479	1.2238	4.87912	5.88004	6.45972	2615	110093324	LOC110093324	guanosine deaminase, transcript variant X2	GO:0005737,GO:0005634,GO:0047974,GO:0008270,GO:0006152	cytoplasm|nucleus|guanosine deaminase activity|zinc ion binding|purine nucleoside catabolic process	-	-
XM_020818171.2	420.48	245.774	595.187	2.42169	1.27601	0.0364508	0.14685	Up	6.97345	6.34582	6.08205	18.1625	16.9336	16.0365	1512	110093325	LOC110093325	probable transcription factor At5g28040	-	-	-	-
XM_020818178.2	106.612	0.355681	212.868	598.48	9.22516	7.66625e-15	1.52806e-12	Up	0.000166966	0.0629412	2.14746e-07	10.7714	10.3227	10.9002	864	110093329	LOC110093329	anaphase-promoting complex subunit 13, transcript variant X1	GO:0005680,GO:0007049,GO:0051301,GO:0010229,GO:0048827,GO:0010152,GO:0061614,GO:0016567	anaphase-promoting complex|cell cycle|cell division|inflorescence development|phyllome development|pollen maturation|pri-miRNA transcription by RNA polymerase II|protein ubiquitination	path:dct04120	Ubiquitin mediated proteolysis
XM_020818180.2	491.096	797.484	184.707	0.231613	-2.11021	0.000673019	0.00689868	Down	39.5683	43.7897	42.8227	11.1519	9.77876	10.8788	755	110093332	LOC110093332	50S ribosomal protein L18, chloroplastic	GO:0009507,GO:0005840,GO:0019843,GO:0003735,GO:0006412	chloroplast|ribosome|rRNA binding|structural constituent of ribosome|translation	path:dct03010	Ribosome
XM_020818181.2	351.882	545.137	158.626	0.290984	-1.78099	0.00440606	0.0305698	Down	20.3139	20.7545	23.4515	7.11358	6.08818	7.20744	1009	110093333	LOC110093333	2-methylene-furan-3-one reductase, transcript variant X2	GO:0009507,GO:0102978,GO:0008270	chloroplast|furaneol oxidoreductase activity|zinc ion binding	-	-
XM_020818183.2	99.5264	165.104	33.9491	0.205623	-2.28193	0.00269048	0.0207314	Down	4.56833	6.25636	6.03603	3.75831	1.16307e-05	0.00121199	1170	110093334	LOC110093334	protein PHLOEM PROTEIN 2-LIKE A10-like	GO:0016021,GO:0030246	integral component of membrane|carbohydrate binding	-	-
XM_020818186.2	1486.5	680.499	2292.51	3.36886	1.75226	0.00303208	0.0228216	Up	18.9667	17.0571	18.6245	66.3861	69.1201	64.7952	1487	110093337	LOC110093337	cathepsin B-like protease 3	GO:0005829,GO:0005615,GO:0005764,GO:0099503,GO:0005773,GO:0004197,GO:0006952,GO:0051603,GO:0050790	cytosol|extracellular space|lysosome|secretory vesicle|vacuole|cysteine-type endopeptidase activity|defense response|proteolysis involved in cellular protein catabolic process|regulation of catalytic activity	-	-
XM_020818187.2	127.008	29.8291	224.187	7.51573	2.90991	7.76972e-05	0.00116612	Up	1.78207	1.54742	1.4132	12.7651	12.8723	12.9803	754	110093338	LOC110093338	uncharacterized LOC110093338	-	-	-	-
XM_020818191.2	1413.63	370.343	2456.91	6.63415	2.72991	8.29873e-06	0.000175314	Up	5.95079	6.17744	7.00955	46.471	46.2802	45.3234	2312	110093341	LOC110093341	transcription factor MYB61	GO:0005634,GO:0003700,GO:0043565,GO:0044212,GO:0030154,GO:0010087,GO:0010119,GO:0009733,GO:0048364,GO:0010214,GO:0010089	nucleus|DNA-binding transcription factor activity|sequence-specific DNA binding|transcription regulatory region DNA binding|cell differentiation|phloem or xylem histogenesis|regulation of stomatal movement|response to auxin|root development|seed coat development|xylem development	-	-
XM_020818196.2	629.989	366.901	893.077	2.43411	1.28339	0.0311711	0.13073	Up	5.31162	5.83558	6.11435	16.2687	16.4001	13.0581	2537	110093344	LOC110093344	mitogen-activated protein kinase 10, transcript variant X1	GO:0005737,GO:0005634,GO:0005524,GO:0004707,GO:0035556,GO:0010468	cytoplasm|nucleus|ATP binding|MAP kinase activity|intracellular signal transduction|regulation of gene expression	-	-
XM_020818199.1	5.46864	0	10.9373	Inf	Inf	0.0333986	0.137623	Up	6.95009e-24	7.08618e-21	3.26991e-16	1.6673	0.0959251	1.11754	486	110093349	LOC110093349	RING-H2 finger protein ATL74-like	GO:0016021,GO:0046872,GO:0016740,GO:0016567	integral component of membrane|metal ion binding|transferase activity|protein ubiquitination	-	-
XM_020818211.2	983.369	1513.75	452.987	0.299248	-1.74058	0.00346014	0.02536	Down	58.2604	58.7246	59.4009	18.6701	19.2746	19.4692	1025	110093356	LOC110093356	uncharacterized LOC110093356	-	-	-	-
XM_020818212.2	352.714	149.953	555.475	3.70433	1.88921	0.00259189	0.0201416	Up	1.70755	2.24169	2.80227	9.80635	8.78893	8.59234	2655	110093359	LOC110093359	N-alpha-acetyltransferase 35, NatC auxiliary subunit, transcript variant X1	GO:0005829,GO:0031417,GO:0005634,GO:0004596,GO:0017196,GO:0006474	cytosol|NatC complex|nucleus|peptide alpha-N-acetyltransferase activity|N-terminal peptidyl-methionine acetylation|N-terminal protein amino acid acetylation	-	-
XM_020818224.2	37.7952	14.7497	60.8407	4.12488	2.04435	0.0302891	0.128207	Up	0.0946179	0.195273	0.185863	0.526581	0.944636	0.699419	3655	110093363	LOC110093363	protein FAR1-RELATED SEQUENCE 7, transcript variant X8	GO:0005634,GO:0008270,GO:0006355	nucleus|zinc ion binding|regulation of transcription, DNA-templated	-	-
XM_020818229.2	84.7873	129.624	39.9506	0.308204	-1.69804	0.0213801	0.0996869	Down	4.14359	1.63396	1.58203	0.564584	0.230516	1.66719	2105	110093366	LOC110093366	putative clathrin assembly protein At5g35200, transcript variant X1	GO:0005905,GO:0030136,GO:0005794,GO:0005886,GO:0005545,GO:0032050,GO:0005546,GO:0000149,GO:0048268,GO:0072583,GO:0006897,GO:0006900	clathrin-coated pit|clathrin-coated vesicle|Golgi apparatus|plasma membrane|1-phosphatidylinositol binding|clathrin heavy chain binding|phosphatidylinositol-4,5-bisphosphate binding|SNARE binding|clathrin coat assembly|clathrin-dependent endocytosis|endocytosis|vesicle budding from membrane	-	-
XM_020818246.2	80.7833	157.995	3.57161	0.0226058	-5.46716	5.16676e-09	2.65529e-07	Down	15.8552	13.9115	15.1493	0.215772	0.515369	0.380944	420	110093376	LOC110093376	putative lipid-binding protein At4g00165	GO:0005576	extracellular region	-	-
XM_020818252.2	28.7319	56.7979	0.665872	0.0117235	-6.41445	4.42419e-06	0.000102272	Down	1.2267	1.22109	1.18187	0.00038754	6.37287e-54	0.0387496	1870	110093382	LOC110093382	probable receptor-like protein kinase At1g80640	-	-	-	-
XM_020818260.2	2258.26	546.595	3969.93	7.26303	2.86057	2.86673e-06	7.08276e-05	Up	11.0206	11.0238	11.7354	86.7653	89.5988	90.491	1933	110093388	LOC110093388	cyanidin 3-O-rutinoside 5-O-glucosyltransferase-like	GO:0047214,GO:0009718	cyanidin-3-rhamnosylglucoside 5-O-glucosyltransferase activity|anthocyanin-containing compound biosynthetic process	-	-
XM_020818267.2	15.8165	0.648557	30.9845	47.7745	5.57817	0.00095278	0.00911593	Up	0	0	0.0496528	0.99026	1.05417	0.923415	1350	110093394	LOC110093394	putrescine hydroxycinnamoyltransferase 1-like	GO:0050734	hydroxycinnamoyltransferase activity	path:dct00940,path:dct00941,path:dct00945,path:dct01100,path:dct01110	Phenylpropanoid biosynthesis|Flavonoid biosynthesis|Stilbenoid, diarylheptanoid and gingerol biosynthesis|Metabolic pathways|Biosynthesis of secondary metabolites
XM_020818274.2	239.514	13.915	465.112	33.4253	5.06287	2.50289e-11	2.26062e-09	Up	0.317872	0.295091	0.358332	11.8357	11.9948	11.1106	1729	110093400	LOC110093400	uncharacterized LOC110093400	GO:0005938,GO:0071944,GO:0005737,GO:0008356	cell cortex|cell periphery|cytoplasm|asymmetric cell division	-	-
XM_020818275.2	168.503	73.0459	263.961	3.61363	1.85345	0.0070478	0.0436842	Up	3.0448	0.141396	2.4319	11.4907	4.73113	5.80595	1556	110093401	LOC110093401	probable protein phosphatase 2C 11, transcript variant X1	GO:0004724,GO:0046872,GO:0004722	magnesium-dependent protein serine/threonine phosphatase activity|metal ion binding|protein serine/threonine phosphatase activity	-	-
XM_020818291.2	99.9674	197.034	2.90065	0.0147216	-6.08592	7.32757e-11	5.94223e-09	Down	4.17035	5.1502	4.52147	0.106319	0.037222	0.0780842	1700	110093412	LOC110093412	WRKY transcription factor WRKY76-like	GO:0005634,GO:0003700,GO:1990841,GO:0043565,GO:0006952,GO:0009740,GO:0009938,GO:0045892,GO:0031347,GO:0009737,GO:0009617,GO:0010200,GO:0009409,GO:0009723,GO:0009620,GO:0009739,GO:0009753,GO:0002237,GO:0002238,GO:0009623,GO:0009751,GO:0009651,GO:0009414,GO:0009611	nucleus|DNA-binding transcription factor activity|promoter-specific chromatin binding|sequence-specific DNA binding|defense response|gibberellic acid mediated signaling pathway|negative regulation of gibberellic acid mediated signaling pathway|negative regulation of transcription, DNA-templated|regulation of defense response|response to abscisic acid|response to bacterium|response to chitin|respo…	-	-
XM_020818294.2	1050.46	1571.88	529.03	0.336558	-1.57107	0.00786154	0.0475459	Down	45.9596	45.558	45.8034	16.1061	16.9686	17.1899	1367	110093414	LOC110093414	protein GrpE	GO:0001405,GO:0000774,GO:0051087,GO:0042803,GO:0051082,GO:0006457,GO:0030150	PAM complex, Tim23 associated import motor|adenyl-nucleotide exchange factor activity|chaperone binding|protein homodimerization activity|unfolded protein binding|protein folding|protein import into mitochondrial matrix	-	-
XM_020818296.2	378.845	699.666	58.0244	0.0829317	-3.59193	9.17446e-08	3.49894e-06	Down	32.8725	37.3782	40.5229	3.52687	3.60722	2.88146	754	110093416	LOC110093416	uncharacterized LOC110093416	-	-	-	-
XM_020818302.2	42.0866	73.4955	10.6776	0.145283	-2.78306	0.00327898	0.0243083	Down	2.57231	2.76649	2.64362	0.305276	0.574143	0.407763	1098	110093420	LOC110093420	chitinase 10	GO:0004568,GO:0016998,GO:0006032,GO:0000272	chitinase activity|cell wall macromolecule catabolic process|chitin catabolic process|polysaccharide catabolic process	-	-
XM_020818330.2	206.262	361.647	50.8771	0.140682	-2.8295	4.00544e-05	0.000667212	Down	7.86639	9.86645	9.0882	2.55313	0.433456	1.10786	1610	110093442	LOC110093442	pheophytinase, chloroplastic, transcript variant X1	GO:0009507,GO:0009570,GO:0009535,GO:0080124,GO:0015996	chloroplast|chloroplast stroma|chloroplast thylakoid membrane|pheophytinase activity|chlorophyll catabolic process	-	-
XM_020818331.2	209.768	87.8367	331.699	3.77631	1.91698	0.00375238	0.0268751	Up	2.62743	2.1574	1.8075	7.4471	9.31989	10.2745	1594	110093442	LOC110093442	pheophytinase, chloroplastic, transcript variant X2	GO:0009507,GO:0009570,GO:0009535,GO:0080124,GO:0015996	chloroplast|chloroplast stroma|chloroplast thylakoid membrane|pheophytinase activity|chlorophyll catabolic process	-	-
XM_020818334.2	72.8043	1.02982	144.579	140.393	7.13333	7.46884e-11	6.04055e-09	Up	0.0283003	0.0947219	1.90969e-10	7.90068	6.95062	7.20817	852	110093444	LOC110093444	adenylyl-sulfate kinase 3-like	GO:0005829,GO:0004020,GO:0005524,GO:0019344,GO:0070814,GO:0000103	cytosol|adenylylsulfate kinase activity|ATP binding|cysteine biosynthetic process|hydrogen sulfide biosynthetic process|sulfate assimilation	path:dct00230,path:dct00920,path:dct01100	Purine metabolism|Sulfur metabolism|Metabolic pathways
XM_020818355.2	433.872	624.142	243.602	0.390298	-1.35735	0.0263215	0.116116	Down	21.1097	23.4741	22.061	10.0432	8.0633	10.2022	1118	110093458	LOC110093458	fatty-acid-binding protein 1	GO:0009507,GO:0009941,GO:0009570,GO:0005829,GO:0005739,GO:0009536,GO:0005504,GO:0016872,GO:0006631	chloroplast|chloroplast envelope|chloroplast stroma|cytosol|mitochondrion|plastid|fatty acid binding|intramolecular lyase activity|fatty acid metabolic process	-	-
XM_020818369.2	131.92	42.3858	221.455	5.22475	2.38536	0.000785479	0.00779459	Up	0.556536	1.27424	1.80384	8.58775	6.92086	5.08597	1396	110093471	LOC110093471	sulfite oxidase, transcript variant X1	GO:0005829,GO:0005739,GO:0005777,GO:0020037,GO:0030151,GO:0043546,GO:0008482,GO:0015994,GO:0042128,GO:0010477,GO:0006790	cytosol|mitochondrion|peroxisome|heme binding|molybdenum ion binding|molybdopterin cofactor binding|sulfite oxidase activity|chlorophyll metabolic process|nitrate assimilation|response to sulfur dioxide|sulfur compound metabolic process	path:dct00920,path:dct01100	Sulfur metabolism|Metabolic pathways
XM_020818370.2	1484.76	2082.51	887.021	0.425939	-1.23128	0.0349767	0.142499	Down	59.8369	68.1896	62.6781	30.8049	28.6591	28.8998	1304	110093472	LOC110093472	60S ribosomal protein L13a-4	GO:0022625,GO:0022626,GO:0009536,GO:0005840,GO:0003729,GO:0003735,GO:0017148,GO:0006412	cytosolic large ribosomal subunit|cytosolic ribosome|plastid|ribosome|mRNA binding|structural constituent of ribosome|negative regulation of translation|translation	path:dct03010	Ribosome
XM_020818376.2	302.232	166.22	438.245	2.63653	1.39864	0.025752	0.114143	Up	1.58984	1.18427	1.26389	4.26388	4.48161	2.82527	4922	110093477	LOC110093477	DNA repair protein UVH3, transcript variant X1	GO:0005634,GO:0017108,GO:0008821,GO:0048256,GO:0046872,GO:0003697,GO:0010213,GO:0006289,GO:0009408	nucleus|5'-flap endonuclease activity|crossover junction endodeoxyribonuclease activity|flap endonuclease activity|metal ion binding|single-stranded DNA binding|non-photoreactive DNA repair|nucleotide-excision repair|response to heat	path:dct03420	Nucleotide excision repair
XM_020818377.2	237.472	370.056	104.887	0.283435	-1.81891	0.00487669	0.0330447	Down	2.78913	2.47455	3.77427	0.978659	0.896914	0.909181	4890	110093477	LOC110093477	DNA repair protein UVH3, transcript variant X2	GO:0005634,GO:0017108,GO:0008821,GO:0048256,GO:0046872,GO:0003697,GO:0010213,GO:0006289,GO:0009408	nucleus|5'-flap endonuclease activity|crossover junction endodeoxyribonuclease activity|flap endonuclease activity|metal ion binding|single-stranded DNA binding|non-photoreactive DNA repair|nucleotide-excision repair|response to heat	path:dct03420	Nucleotide excision repair
XM_020818379.2	1123.37	556.023	1690.71	3.04072	1.60441	0.00641258	0.0406148	Up	4.67718	5.95522	3.71993	12.8495	17.5329	17.1021	4628	110093477	LOC110093477	DNA repair protein UVH3, transcript variant X4	GO:0005634,GO:0017108,GO:0008821,GO:0048256,GO:0046872,GO:0003697,GO:0010213,GO:0006289,GO:0009408	nucleus|5'-flap endonuclease activity|crossover junction endodeoxyribonuclease activity|flap endonuclease activity|metal ion binding|single-stranded DNA binding|non-photoreactive DNA repair|nucleotide-excision repair|response to heat	path:dct03420	Nucleotide excision repair
XM_020818390.2	5603.27	3079.28	8127.25	2.63933	1.40017	0.0159263	0.0799943	Up	35.1443	26.1753	27.8595	63.2433	96.7935	96.1045	4124	110093483	LOC110093483	protein TPR3, transcript variant X1	GO:0006355	regulation of transcription, DNA-templated	-	-
XM_020818393.2	53.0572	87.1477	18.9667	0.217638	-2.2	0.010949	0.0608752	Down	3.96864	3.90555	3.04356	0.955864	1.08334	0.566253	953	110093486	LOC110093486	uncharacterized LOC110093486	-	-	-	-
XM_020818416.2	174.84	266.815	82.8656	0.310573	-1.687	0.0114177	0.0627279	Down	4.71712	4.41778	4.18908	1.55114	1.1086	1.84382	2391	110093508	LOC110093508	zinc finger MYM-type protein 1-like	-	-	-	-
XM_020818421.2	33.4199	2.25247	64.5874	28.674	4.84167	3.66637e-05	0.000618242	Up	0.14443	0	0.173718	3.3738	3.36036	3.3047	836	110093515	LOC110093515	protein DROOPING LEAF	GO:0005634,GO:0003677,GO:0046872,GO:0048440,GO:0045165,GO:0010582,GO:0048366,GO:0010022,GO:0010094,GO:0048479	nucleus|DNA binding|metal ion binding|carpel development|cell fate commitment|floral meristem determinacy|leaf development|meristem determinacy|specification of carpel identity|style development	-	-
XM_020818426.1	63.3101	117.887	8.73353	0.0740841	-3.75469	2.38117e-05	0.00043456	Down	7.20559	6.44477	7.55945	0.515097	0.606879	0.556364	663	110093520	LOC110093520	purine permease 3-like	GO:0016021,GO:0016020,GO:0005345,GO:0015211,GO:0006863	integral component of membrane|membrane|purine nucleobase transmembrane transporter activity|purine nucleoside transmembrane transporter activity|purine nucleobase transport	-	-
XM_020818445.2	262.264	392.939	131.589	0.334883	-1.57827	0.0141882	0.0735167	Down	2.98061	2.99121	0.940639	0.613121	1.54824	0.356238	6793	110093533	LOC110093533	mediator of RNA polymerase II transcription subunit 12, transcript variant X5	GO:0016592,GO:0005634,GO:0003712,GO:0007275,GO:0040034,GO:0040008,GO:0090213,GO:0006357	mediator complex|nucleus|transcription coregulator activity|multicellular organism development|regulation of development, heterochronic|regulation of growth|regulation of radial pattern formation|regulation of transcription by RNA polymerase II	-	-
XM_020818457.2	268.067	80.0543	456.079	5.69712	2.51023	0.000134581	0.00184206	Up	2.27465	2.31414	2.27985	14.7698	14.1227	13.8279	1386	110093541	LOC110093541	alpha/beta hydrolase domain-containing protein 17B-like	GO:0005783,GO:0016021,GO:0016788	endoplasmic reticulum|integral component of membrane|hydrolase activity, acting on ester bonds	-	-
XM_020818460.2	956.391	1388.29	524.493	0.377798	-1.40431	0.0176012	0.0862954	Down	27.0415	29.1633	26.1666	10.8947	11.999	10.945	2013	110093540	LOC110093540	phospholipase A(1) LCAT3	GO:0005783,GO:0031090,GO:0052740,GO:0008374,GO:0052739,GO:0008970,GO:0016042	endoplasmic reticulum|organelle membrane|1-acyl-2-lysophosphatidylserine acylhydrolase activity|O-acyltransferase activity|phosphatidylserine 1-acylhydrolase activity|phospholipase A1 activity|lipid catabolic process	path:dct00564,path:dct00592,path:dct01100,path:dct01110	Glycerophospholipid metabolism|alpha-Linolenic acid metabolism|Metabolic pathways|Biosynthesis of secondary metabolites
XM_020818468.2	744.144	1168.14	320.149	0.274068	-1.86739	0.00196484	0.0162673	Down	32.2298	32.4662	32.7004	9.87323	9.12099	10.0611	1432	110093551	LOC110093551	28 kDa ribonucleoprotein, chloroplastic	GO:0009507,GO:0003723,GO:0006397	chloroplast|RNA binding|mRNA processing	-	-
XM_020818470.2	37.6448	11.981	63.3086	5.2841	2.40166	0.0126175	0.0675418	Up	1.13942	1.3099	1.14957	6.89075	7.51461	6.9505	387	110093553	LOC110093553	uncharacterized LOC110093553	-	-	-	-
XM_020818471.2	1225.87	1902.11	549.628	0.288957	-1.79107	0.00249637	0.0195605	Down	41.2729	39.6921	43.4811	12.9023	12.7514	13.4695	1825	110093550	LOC110093550	2,3-dimethylmalate lyase	GO:0009507,GO:0009570,GO:0008807	chloroplast|chloroplast stroma|carboxyvinyl-carboxyphosphonate phosphorylmutase activity	-	-
XM_020818475.2	36.1689	7.76306	64.5748	8.31821	3.05627	0.00225968	0.0181104	Up	0.193111	0.306695	0.12903	2.93209	0.996661	1.75711	1477	110093558	LOC110093558	probable beta-1,3-galactosyltransferase 14, transcript variant X2	GO:0005794,GO:0000139,GO:0016021,GO:0008378,GO:0006486	Golgi apparatus|Golgi membrane|integral component of membrane|galactosyltransferase activity|protein glycosylation	-	-
XM_020818476.2	7.31852	0.355681	14.2814	40.1521	5.3274	0.0282653	0.122108	Up	0.00119153	0.0362758	0.00130245	0.290705	0.512434	0.50829	1414	110093558	LOC110093558	probable beta-1,3-galactosyltransferase 14, transcript variant X3	GO:0005794,GO:0000139,GO:0016021,GO:0008378,GO:0006486	Golgi apparatus|Golgi membrane|integral component of membrane|galactosyltransferase activity|protein glycosylation	-	-
XM_020818477.2	441.372	834.651	48.0927	0.0576201	-4.11728	1.63316e-09	9.548e-08	Down	16.6226	16.6629	16.1053	1.10521	0.944674	1.03135	2018	110093559	LOC110093559	leucine-rich repeat receptor-like serine/threonine/tyrosine-protein kinase SOBIR1	-	-	-	-
XM_020818478.2	1310.73	1866.54	754.924	0.404451	-1.30596	0.0252398	0.112618	Down	45.9302	43.5684	46.8481	20.3766	19.7842	19.828	1635	110093561	LOC110093561	magnesium-chelatase subunit ChlI, chloroplastic	GO:0009570,GO:0005524,GO:0016851,GO:0015995,GO:0015979	chloroplast stroma|ATP binding|magnesium chelatase activity|chlorophyll biosynthetic process|photosynthesis	path:dct00860,path:dct01100,path:dct01110	Porphyrin and chlorophyll metabolism|Metabolic pathways|Biosynthesis of secondary metabolites
XM_020818482.2	1058	1695.38	420.622	0.248099	-2.01101	0.000799967	0.00790872	Down	58.5896	56.3633	52.259	13.5776	18.3531	13.199	1211	110093560	LOC110093560	2,3-dimethylmalate lyase-like	GO:0047776,GO:0046872,GO:0030603,GO:0016740	citramalate lyase activity|metal ion binding|oxaloacetase activity|transferase activity	-	-
XM_020818486.2	70.8749	125.545	16.2046	0.129074	-2.95373	0.000348479	0.00402011	Down	2.67708	2.59422	3.28034	0.328156	0.403982	0.463402	1752	110093562	LOC110093562	uncharacterized LOC110093562, transcript variant X7	-	-	-	-
XM_020818487.2	41.2429	73.3157	9.17013	0.125077	-2.99911	0.00181331	0.0153198	Down	1.3469	1.86471	1.26394	0.0630369	0.185114	0.346661	1956	110093564	LOC110093564	transcription factor TCP4, transcript variant X1	GO:0005634,GO:0003677,GO:0001216,GO:0003700,GO:0043565,GO:1990837,GO:0030154,GO:0048825,GO:0048826,GO:0009793,GO:0048366,GO:0009965,GO:0045962,GO:2000032,GO:0048831,GO:0006355	nucleus|DNA binding|DNA-binding transcription activator activity|DNA-binding transcription factor activity|sequence-specific DNA binding|sequence-specific double-stranded DNA binding|cell differentiation|cotyledon development|cotyledon morphogenesis|embryo development ending in seed dormancy|leaf development|leaf morphogenesis|positive regulation of development, heterochronic|regulation of second…	-	-
XM_020818489.2	257.993	498.204	17.7814	0.035691	-4.8083	8.11932e-11	6.51424e-09	Down	18.6225	16.7193	18.6378	0.631777	0.755337	0.722934	1102	110093565	LOC110093565	uncharacterized LOC110093565	-	-	-	-
XM_020818492.2	3258.77	1626.03	4891.51	3.00826	1.58893	0.00639142	0.0405233	Up	12.9362	10.855	8.76618	31.6117	36.7583	38.1883	5965	110093566	LOC110093566	myosin-2, transcript variant X1	-	-	-	-
XM_020818509.2	865.179	1242.8	487.555	0.392303	-1.34996	0.0224432	0.103282	Down	20.5855	19.8879	19.3029	8.22154	9.24706	8.05826	2483	110093577	LOC110093577	long chain acyl-CoA synthetase 4	GO:0005794,GO:0005886,GO:0003996,GO:0005524,GO:0102391,GO:0004467,GO:0006631	Golgi apparatus|plasma membrane|acyl-CoA ligase activity|ATP binding|decanoate-CoA ligase activity|long-chain fatty acid-CoA ligase activity|fatty acid metabolic process	path:dct00061,path:dct00071,path:dct01100,path:dct01212,path:dct04146	Fatty acid biosynthesis|Fatty acid degradation|Metabolic pathways|Fatty acid metabolism|Peroxisome
XM_020818515.2	356.404	568.07	144.738	0.25479	-1.97262	0.0017027	0.0145594	Down	15.3911	14.2319	14.4331	4.13994	3.81901	4.25573	1540	110093582	LOC110093582	pentatricopeptide repeat-containing protein At1g62350-like	-	-	path:dct00520,path:dct01100	Amino sugar and nucleotide sugar metabolism|Metabolic pathways
XM_020818518.2	169.308	68.7949	269.821	3.92211	1.97163	0.00370763	0.0266749	Up	1.75867	1.52777	2.02339	7.6706	7.86952	7.15216	1545	110093584	LOC110093584	FHA domain-containing protein At4g14490	-	-	-	-
XM_020818524.2	66.8626	7.01447	126.711	18.0642	4.17506	3.55032e-06	8.51372e-05	Up	0.108465	0.119832	0.0696674	1.94752	2.03474	2.13196	2687	110093591	LOC110093591	rab9 effector protein with kelch motifs	GO:0005829,GO:0000062,GO:0008289,GO:0006869,GO:0001666,GO:0009416	cytosol|fatty-acyl-CoA binding|lipid binding|lipid transport|response to hypoxia|response to light stimulus	-	-
XM_020818528.2	195.815	341.192	50.4385	0.14783	-2.75799	6.14599e-05	0.000955209	Down	15.2797	19.167	14.8354	2.43305	2.79505	2.71243	827	110093597	LOC110093597	uncharacterized LOC110093597	-	-	-	-
XM_020818531.2	64.2617	6.57851	121.945	18.5369	4.21232	4.28592e-06	0.00010015	Up	0.384695	0.2214	0.161391	4.01456	4.83149	6.16008	1054	110093599	LOC110093599	uncharacterized LOC110093599, transcript variant X1	-	-	-	-
XM_020818532.2	95.4413	151.966	38.9169	0.25609	-1.96528	0.00846499	0.0502486	Down	6.38246	6.83935	6.31678	2.1823	1.85218	1.42471	928	110093599	LOC110093599	uncharacterized LOC110093599, transcript variant X2	-	-	-	-
XM_020818562.2	33.1299	13.1839	53.076	4.02583	2.00929	0.0435691	0.166859	Up	0.364853	0.324982	0.619658	1.8431	1.62837	2.21342	1206	110093619	LOC110093619	transcription factor bHLH18	GO:0005634,GO:0003677,GO:0003700,GO:0046983,GO:0006355	nucleus|DNA binding|DNA-binding transcription factor activity|protein dimerization activity|regulation of transcription, DNA-templated	-	-
XM_020818564.2	110.465	203.452	17.4772	0.0859033	-3.54114	5.13327e-06	0.000116345	Down	5.86439	5.35802	5.87458	0.354511	0.775353	0.489546	1422	110093622	LOC110093622	protein RETICULATA-RELATED 3, chloroplastic-like	GO:0009507,GO:0009941,GO:0031969,GO:0005829,GO:0016021,GO:0009536,GO:0009793,GO:0048366,GO:0009648,GO:0000302	chloroplast|chloroplast envelope|chloroplast membrane|cytosol|integral component of membrane|plastid|embryo development ending in seed dormancy|leaf development|photoperiodism|response to reactive oxygen species	-	-
XM_020818573.2	49.9163	20.3565	79.4761	3.90421	1.96503	0.0240304	0.108701	Up	6.60117e-09	0.117652	0.750138	1.50823	1.65544	0.548772	2774	110093630	LOC110093630	DEAD-box ATP-dependent RNA helicase 32, transcript variant X2	GO:0005634,GO:0005524,GO:0003723,GO:0003724,GO:0006364	nucleus|ATP binding|RNA binding|RNA helicase activity|rRNA processing	-	-
XM_020818577.2	661.47	398.357	924.582	2.32099	1.21474	0.0415338	0.160959	Up	12.6867	10.7296	8.6461	28.5447	24.4601	27.9611	1484	110093632	LOC110093632	uncharacterized LOC110093632, transcript variant X3	-	-	-	-
XM_020818579.2	685.453	1016.82	354.085	0.348228	-1.5219	0.0114818	0.0629803	Down	16.6114	16.5996	13.744	6.89641	6.55436	4.32417	2586	110093633	LOC110093633	DNA mismatch repair protein MSH2, transcript variant X2	GO:0032300,GO:0032301,GO:0032302,GO:0005634,GO:0005524,GO:0008094,GO:0000406,GO:0030983,GO:0006310,GO:0043570,GO:0006298,GO:0045910,GO:0006301	mismatch repair complex|MutSalpha complex|MutSbeta complex|nucleus|ATP binding|DNA-dependent ATPase activity|double-strand/single-strand DNA junction binding|mismatched DNA binding|DNA recombination|maintenance of DNA repeat elements|mismatch repair|negative regulation of DNA recombination|postreplication repair	path:dct03430	Mismatch repair
XM_020818580.2	90.938	11.545	170.331	14.7537	3.883	2.63372e-06	6.58255e-05	Up	0.319924	0.212915	0.246224	4.03221	4.15213	4.35638	1765	110093634	LOC110093634	endoglucanase 11	GO:0005576,GO:0008810,GO:0071555,GO:0030245	extracellular region|cellulase activity|cell wall organization|cellulose catabolic process	-	-
XM_020818581.2	46.3825	17.8889	74.8762	4.18563	2.06544	0.0202019	0.0957192	Up	0.39191	0.389811	0.567633	2.80119	1.60324	1.69102	1600	110093635	LOC110093635	homeobox protein knotted-1-like 13, transcript variant X1	GO:0005829,GO:0005634,GO:0003677,GO:0003700,GO:0009416	cytosol|nucleus|DNA binding|DNA-binding transcription factor activity|response to light stimulus	-	-
XM_020818584.2	17.3598	4.03088	30.6887	7.61341	2.92854	0.026579	0.116865	Up	0.0829887	0.129314	0.100543	0.842657	0.954493	0.85941	1494	110093636	LOC110093636	protein DETOXIFICATION 40	GO:0016021,GO:0016020,GO:0005774,GO:0005773,GO:0015297,GO:0022857,GO:0042910	integral component of membrane|membrane|vacuolar membrane|vacuole|antiporter activity|transmembrane transporter activity|xenobiotic transmembrane transporter activity	-	-
XM_020818590.2	542.856	811.873	273.839	0.337293	-1.56793	0.00965524	0.0555964	Down	43.3689	43.463	45.446	15.5724	17.555	15.4741	733	110093641	LOC110093641	protein FATTY ACID EXPORT 5	GO:0016021	integral component of membrane	-	-
XM_020818591.2	137.918	41.4261	234.41	5.65851	2.50042	0.000481629	0.00521886	Up	1.22937	0.671674	0.815501	3.37952	9.69195	3.70652	1815	110093639	LOC110093639	P-loop guanosine triphosphatase YjiA, transcript variant X1	GO:0005737,GO:0005524,GO:0003824	cytoplasm|ATP binding|catalytic activity	-	-
XM_020818601.2	39.6127	69.1184	10.107	0.146227	-2.77371	0.00397009	0.0280877	Down	1.17374	1.38576	0.934532	0.0018387	0.361857	0.194704	2362	110093650	LOC110093650	uncharacterized protein At5g41620-like, transcript variant X1	GO:0009507,GO:0005886	chloroplast|plasma membrane	-	-
XM_020818606.2	12.1277	0.648557	23.6069	36.3991	5.18583	0.00513461	0.0344209	Up	0	0	0.0685166	0.744474	0.589352	0.825656	1395	110093653	LOC110093653	probable protein S-acyltransferase 1	GO:0005829,GO:0005783,GO:0005794,GO:0016021,GO:0005886,GO:0019706,GO:0018230,GO:0006612	cytosol|endoplasmic reticulum|Golgi apparatus|integral component of membrane|plasma membrane|protein-cysteine S-palmitoyltransferase activity|peptidyl-L-cysteine S-palmitoylation|protein targeting to membrane	-	-
XM_020818608.2	56.6582	1.03564	112.281	108.417	6.76044	3.11577e-09	1.69269e-07	Up	0	0.0467112	0.0142049	2.69228	3.85571	3.39386	1467	110093655	LOC110093655	uncharacterized LOC110093655, transcript variant X1	-	-	-	-
XM_020818609.2	14.6949	1.03564	28.3542	27.3784	4.77496	0.00307609	0.0230858	Up	0	0.0470575	0.0142471	1.159	0.490648	0.905616	1448	110093655	LOC110093655	uncharacterized LOC110093655, transcript variant X2	-	-	-	-
XM_020818611.2	119.37	200.41	38.3293	0.191255	-2.38643	0.00106444	0.00997235	Down	2.77804	3.72	3.03879	0.900111	0.410727	0.674876	2510	110093656	LOC110093656	condensin-2 complex subunit H2, transcript variant X2	GO:0000793,GO:0000796,GO:0005730,GO:0005634,GO:0003682,GO:0051276,GO:0010032,GO:0051306,GO:0045739,GO:2001022	condensed chromosome|condensin complex|nucleolus|nucleus|chromatin binding|chromosome organization|meiotic chromosome condensation|mitotic sister chromatid separation|positive regulation of DNA repair|positive regulation of response to DNA damage stimulus	-	-
XM_020818617.2	2030.96	394.03	3667.89	9.30866	3.21857	2.22692e-07	7.62539e-06	Up	19.8654	21.1554	21.8185	208.953	209.693	217.631	749	110093661	LOC110093661	uncharacterized LOC110093661	GO:0046872,GO:0030001	metal ion binding|metal ion transport	-	-
XM_020818621.2	317.151	633.044	1.25737	0.00198623	-8.97575	2.87665e-21	2.1695e-18	Down	18.4133	10.774	16.6825	0.107227	1.62911e-27	0	1648	110093664	LOC110093664	uncharacterized LOC110093664, transcript variant X2	-	-	-	-
XM_020818626.2	4734.8	7043.85	2425.74	0.344377	-1.53794	0.00785177	0.0474964	Down	104.109	101.747	103.973	40.0016	37.4951	38.577	2715	110093667	LOC110093667	5-methyltetrahydropteroyltriglutamate--homocysteine methyltransferase 2	GO:0005829,GO:0003871,GO:0008270,GO:0009086	cytosol|5-methyltetrahydropteroyltriglutamate-homocysteine S-methyltransferase activity|zinc ion binding|methionine biosynthetic process	path:dct00270,path:dct00450,path:dct01100,path:dct01110,path:dct01230	Cysteine and methionine metabolism|Selenocompound metabolism|Metabolic pathways|Biosynthesis of secondary metabolites|Biosynthesis of amino acids
XM_020818635.2	36.2174	67.0064	5.42838	0.0810128	-3.62571	0.000557449	0.005903	Down	0.0139538	1.01695	1.40371	0.112279	0.0727263	0.0308715	3287	110093673	LOC110093673	uncharacterized LOC110093673, transcript variant X5	-	-	-	-
XM_020818636.2	11.9473	1.00424	22.8903	22.7937	4.51056	0.010369	0.058533	Up	1.95791e-09	0.0181525	0.0330216	0.247843	0.177102	0.696133	2655	110093673	LOC110093673	uncharacterized LOC110093673, transcript variant X6	-	-	-	-
XM_020818638.2	187.851	283.066	92.6351	0.327256	-1.61151	0.0158373	0.0796403	Down	8.93046	6.33104	6.45774	6.37383	0.163121	1.21071	1555	110093639	LOC110093639	P-loop guanosine triphosphatase YjiA, transcript variant X4	GO:0005737,GO:0005524,GO:0003824	cytoplasm|ATP binding|catalytic activity	-	-
XM_020818663.2	379.206	732.854	25.5579	0.0348744	-4.84169	1.36876e-11	1.30669e-09	Down	36.3697	32.9579	34.356	0.803764	1.96119	1.10542	844	114578321	LOC114578321	early light-induced protein 1, chloroplastic-like, transcript variant X1	GO:0009535,GO:0016021,GO:0009522,GO:0009523,GO:0071483,GO:0071490,GO:0034605,GO:0071486,GO:0071491,GO:0071492,GO:0010117,GO:0015979,GO:0010030,GO:0010380,GO:0009409,GO:0080167	chloroplast thylakoid membrane|integral component of membrane|photosystem I|photosystem II|cellular response to blue light|cellular response to far red light|cellular response to heat|cellular response to high light intensity|cellular response to red light|cellular response to UV-A|photoprotection|photosynthesis|positive regulation of seed germination|regulation of chlorophyll biosynthetic proces…	-	-
XM_020818664.2	65.2146	126.221	4.20819	0.0333398	-4.90661	2.30871e-07	7.85196e-06	Down	6.28173	4.5664	7.16658	0.126425	0.316023	0.205134	834	114578321	LOC114578321	early light-induced protein 1, chloroplastic-like, transcript variant X2	GO:0009535,GO:0016021,GO:0009522,GO:0009523,GO:0071483,GO:0071490,GO:0034605,GO:0071486,GO:0071491,GO:0071492,GO:0010117,GO:0015979,GO:0010030,GO:0010380,GO:0009409,GO:0080167	chloroplast thylakoid membrane|integral component of membrane|photosystem I|photosystem II|cellular response to blue light|cellular response to far red light|cellular response to heat|cellular response to high light intensity|cellular response to red light|cellular response to UV-A|photoprotection|photosynthesis|positive regulation of seed germination|regulation of chlorophyll biosynthetic proces…	-	-
XM_020818665.2	9.8451	19.6902	0	0	#NAME?	0.00218908	0.0177141	Down	1.55788	0.731063	0.910529	7.48592e-26	1.0496e-24	2.34276e-07	733	110093692	LOC110093692	early light-induced protein 1, chloroplastic	GO:0009535,GO:0016021,GO:0009522,GO:0009523,GO:0071483,GO:0071490,GO:0034605,GO:0071486,GO:0071491,GO:0071492,GO:0010117,GO:0015979,GO:0010030,GO:0010380,GO:0009409,GO:0080167	chloroplast thylakoid membrane|integral component of membrane|photosystem I|photosystem II|cellular response to blue light|cellular response to far red light|cellular response to heat|cellular response to high light intensity|cellular response to red light|cellular response to UV-A|photoprotection|photosynthesis|positive regulation of seed germination|regulation of chlorophyll biosynthetic proces…	-	-
XM_020818668.2	37.9302	73.5299	2.33055	0.0316953	-4.97959	8.25227e-06	0.000174635	Down	3.60691	2.73588	4.42183	3.69114e-28	6.52434e-27	0.3837	815	110093695	LOC110093695	early light-induced protein 1, chloroplastic-like	GO:0009535,GO:0016021,GO:0009522,GO:0009523,GO:0071483,GO:0071490,GO:0034605,GO:0071486,GO:0071491,GO:0071492,GO:0010117,GO:0015979,GO:0010030,GO:0010380,GO:0009409,GO:0080167	chloroplast thylakoid membrane|integral component of membrane|photosystem I|photosystem II|cellular response to blue light|cellular response to far red light|cellular response to heat|cellular response to high light intensity|cellular response to red light|cellular response to UV-A|photoprotection|photosynthesis|positive regulation of seed germination|regulation of chlorophyll biosynthetic proces…	-	-
XM_020818669.2	116.19	199.787	32.5934	0.163141	-2.61581	0.00040448	0.00452739	Down	7.74534	11.8639	9.60143	1.81246	1.73701	1.66873	817	110093696	LOC110093696	early light-induced protein 1, chloroplastic-like	GO:0009535,GO:0016021,GO:0009522,GO:0009523,GO:0071483,GO:0071490,GO:0034605,GO:0071486,GO:0071491,GO:0071492,GO:0010117,GO:0015979,GO:0010030,GO:0010380,GO:0009409,GO:0080167	chloroplast thylakoid membrane|integral component of membrane|photosystem I|photosystem II|cellular response to blue light|cellular response to far red light|cellular response to heat|cellular response to high light intensity|cellular response to red light|cellular response to UV-A|photoprotection|photosynthesis|positive regulation of seed germination|regulation of chlorophyll biosynthetic proces…	-	-
XM_020818670.2	877.688	321.018	1434.36	4.46815	2.15968	0.000373987	0.00424297	Up	5.64763	4.9055	5.02413	25.8032	24.7363	25.1882	2461	110093693	LOC110093693	probable serine/threonine-protein kinase WNK3, transcript variant X2	GO:0005737,GO:0005524,GO:0004674,GO:0035556,GO:0006468	cytoplasm|ATP binding|protein serine/threonine kinase activity|intracellular signal transduction|protein phosphorylation	-	-
XM_020818674.2	838.437	1417.96	258.911	0.182594	-2.45329	6.33347e-05	0.000982094	Down	50.9117	48.624	54.2285	10.239	10.4768	9.82032	1101	110093699	LOC110093699	probable ribose-5-phosphate isomerase 3, chloroplastic	GO:0009507,GO:0009941,GO:0009570,GO:0009535,GO:0005829,GO:0009579,GO:0004751,GO:0042742,GO:0009052,GO:0019253	chloroplast|chloroplast envelope|chloroplast stroma|chloroplast thylakoid membrane|cytosol|thylakoid|ribose-5-phosphate isomerase activity|defense response to bacterium|pentose-phosphate shunt, non-oxidative branch|reductive pentose-phosphate cycle	path:dct00030,path:dct00710,path:dct01100,path:dct01110,path:dct01200,path:dct01230	Pentose phosphate pathway|Carbon fixation in photosynthetic organisms|Metabolic pathways|Biosynthesis of secondary metabolites|Carbon metabolism|Biosynthesis of amino acids
XM_020818680.2	316.779	175.297	458.262	2.6142	1.38637	0.0253173	0.11278	Up	12.4053	23.7524	18.3147	50.1282	31.0879	73.9331	384	110093704	LOC110093704	B2 protein-like	-	-	-	-
XM_020818690.2	55.9686	109.362	2.57561	0.0235513	-5.40805	1.4719e-07	5.27976e-06	Down	5.96646	6.51958	6.6171	0.181809	0.189865	0.0989977	686	110093714	LOC110093714	AP2-like ethylene-responsive transcription factor At1g79700	GO:0005634,GO:0003677,GO:0003700,GO:0019900,GO:0009873,GO:0008610,GO:0006629,GO:1901959,GO:0006109,GO:0006110,GO:0009744,GO:0019432	nucleus|DNA binding|DNA-binding transcription factor activity|kinase binding|ethylene-activated signaling pathway|lipid biosynthetic process|lipid metabolic process|positive regulation of cutin biosynthetic process|regulation of carbohydrate metabolic process|regulation of glycolytic process|response to sucrose|triglyceride biosynthetic process	-	-
XM_020818691.2	11.3941	22.7881	0	0	#NAME?	0.000944945	0.00906108	Down	0.945041	1.48024	1.09752	0	0	0	783	110093715	LOC110093715	peroxidase-like	GO:0005576,GO:0020037,GO:0046872,GO:0004601,GO:0042744,GO:0006979	extracellular region|heme binding|metal ion binding|peroxidase activity|hydrogen peroxide catabolic process|response to oxidative stress	path:dct00940,path:dct01100,path:dct01110	Phenylpropanoid biosynthesis|Metabolic pathways|Biosynthesis of secondary metabolites
XM_020818695.1	10.474	20.948	0	0	#NAME?	0.00180799	0.0152949	Down	0.0350853	3.28482	1.43392e-06	5.15233e-08	5.82015e-06	0.00198271	746	110093718	LOC110093718	allene oxide cyclase, chloroplastic-like	GO:0009507,GO:0046423,GO:0009734,GO:0007623,GO:0050832,GO:0080186,GO:0009908,GO:0009864,GO:0009695,GO:0048573,GO:1900367,GO:0009737,GO:0009646,GO:0009637,GO:0009723,GO:0010218,GO:0042542,GO:0009625,GO:0009753,GO:0009416,GO:0010038,GO:0010114,GO:0009751,GO:0009651,GO:0033274,GO:0009611,GO:0006636	chloroplast|allene-oxide cyclase activity|auxin-activated signaling pathway|circadian rhythm|defense response to fungus|developmental vegetative growth|flower development|induced systemic resistance, jasmonic acid mediated signaling pathway|jasmonic acid biosynthetic process|photoperiodism, flowering|positive regulation of defense response to insect|response to abscisic acid|response to absence o…	path:dct00592,path:dct01100,path:dct01110	alpha-Linolenic acid metabolism|Metabolic pathways|Biosynthesis of secondary metabolites
XM_020818696.2	65.2649	107.08	23.4498	0.218993	-2.19105	0.00747794	0.0457859	Down	4.72276	5.1046	4.77299	1.45867	1.26002	0.812487	876	110093719	LOC110093719	calmodulin-binding receptor kinase CaMRLK-like	GO:0016021,GO:0005886,GO:0005524,GO:0005516,GO:0004672,GO:0009793,GO:0046777,GO:0009733,GO:0009625,GO:0006970	integral component of membrane|plasma membrane|ATP binding|calmodulin binding|protein kinase activity|embryo development ending in seed dormancy|protein autophosphorylation|response to auxin|response to insect|response to osmotic stress	-	-
XM_020818713.2	749.493	1061.78	437.209	0.411771	-1.28009	0.0310786	0.130513	Down	17.8899	19.0981	18.4951	7.7787	8.8168	8.27842	2285	110093733	LOC110093733	uncharacterized LOC110093733	GO:0004190,GO:0004519,GO:0003676,GO:0003964,GO:0008270,GO:0015074	aspartic-type endopeptidase activity|endonuclease activity|nucleic acid binding|RNA-directed DNA polymerase activity|zinc ion binding|DNA integration	-	-
XM_020818717.2	2875.66	1427.76	4323.57	3.02822	1.59847	0.00605743	0.0389792	Up	32.1161	30.6917	31.7743	105.135	103.927	102.493	1803	110093738	LOC110093738	lysosomal Pro-X carboxypeptidase	GO:0005576,GO:0005773,GO:0008239,GO:0008236,GO:0009561,GO:0006508	extracellular region|vacuole|dipeptidyl-peptidase activity|serine-type peptidase activity|megagametogenesis|proteolysis	-	-
XM_020818720.2	287.665	468.265	107.066	0.228644	-2.12883	0.000922576	0.00889012	Down	17.2764	15.9727	16.0997	3.40771	4.72117	4.14227	1134	110093737	LOC110093737	uncharacterized LOC110093737	-	-	-	-
XM_020818723.2	212.902	326.803	99.0014	0.302939	-1.7229	0.00854277	0.0505511	Down	9.59249	10.0425	9.2749	3.68512	2.73487	3.11886	1351	110093745	LOC110093745	replication factor C subunit 2	GO:0005663,GO:0005730,GO:0005634,GO:0005524,GO:0003677,GO:0006261	DNA replication factor C complex|nucleolus|nucleus|ATP binding|DNA binding|DNA-dependent DNA replication	path:dct03030,path:dct03420,path:dct03430	DNA replication|Nucleotide excision repair|Mismatch repair
XM_020818727.2	126.251	32.5606	219.942	6.75487	2.75593	0.000163122	0.00216971	Up	1.20566	1.29512	1.25805	9.4527	8.91552	9.39927	1030	110093749	LOC110093749	uncharacterized LOC110093749	-	-	-	-
XM_020818736.2	19.6796	0	39.3591	Inf	Inf	1.39397e-05	0.000276476	Up	7.9033e-16	0	0	1.37513	1.0851	1.20895	1403	110093756	LOC110093756	axial regulator YABBY 1-like	GO:0005634,GO:0046872,GO:0010158,GO:0045165,GO:0010154,GO:0009944,GO:2000024,GO:1902183	nucleus|metal ion binding|abaxial cell fate specification|cell fate commitment|fruit development|polarity specification of adaxial/abaxial axis|regulation of leaf development|regulation of shoot apical meristem development	-	-
XM_020818742.2	3413.28	2011.39	4815.17	2.39395	1.25939	0.0288697	0.124026	Up	71.5104	73.869	78.2542	189.516	194.237	198.799	1074	110093764	LOC110093764	tubulin-folding cofactor B, transcript variant X1	GO:0005737,GO:0005829,GO:0005634,GO:0009524,GO:0051301,GO:0009793	cytoplasm|cytosol|nucleus|phragmoplast|cell division|embryo development ending in seed dormancy	-	-
XM_020818778.2	347.931	516.566	179.295	0.34709	-1.52662	0.0142051	0.0735859	Down	13.6039	14.5262	13.0793	5.32098	4.81766	5.42512	1497	110093784	LOC110093784	protein trichome birefringence-like 26	GO:0005794,GO:0016021,GO:0016413	Golgi apparatus|integral component of membrane|O-acetyltransferase activity	-	-
XM_020818780.2	545.925	854.248	237.602	0.278142	-1.84611	0.00251758	0.0196858	Down	13.6537	13.9164	12.5761	3.78428	4.19175	4.17981	2541	110093788	LOC110093788	protein REDUCED WALL ACETYLATION 1	GO:0005794,GO:0000139,GO:0016021,GO:0016407,GO:0016491,GO:0005975,GO:0009834,GO:1990937,GO:0045492,GO:0045491,GO:0010411	Golgi apparatus|Golgi membrane|integral component of membrane|acetyltransferase activity|oxidoreductase activity|carbohydrate metabolic process|plant-type secondary cell wall biogenesis|xylan acetylation|xylan biosynthetic process|xylan metabolic process|xyloglucan metabolic process	-	-
XM_020818785.2	210.547	321.279	99.8145	0.310678	-1.68651	0.00985153	0.0564573	Down	11.0361	10.785	10.8726	3.52176	3.89397	3.61389	1174	110093790	LOC110093790	putative glucose-6-phosphate 1-epimerase, transcript variant X7	GO:0030246,GO:0047938,GO:0005975	carbohydrate binding|glucose-6-phosphate 1-epimerase activity|carbohydrate metabolic process	path:dct00010,path:dct01100,path:dct01110	Glycolysis / Gluconeogenesis|Metabolic pathways|Biosynthesis of secondary metabolites
XM_020818791.2	37.0029	9.22972	64.7761	7.01821	2.8111	0.00455784	0.0313632	Up	0.27745	0.180857	0.222725	1.79896	1.99635	1.43085	1614	110093797	LOC110093797	SNF1-related protein kinase regulatory subunit gamma-1	GO:0005524,GO:0019887,GO:0005975,GO:0006633,GO:0042128	ATP binding|protein kinase regulator activity|carbohydrate metabolic process|fatty acid biosynthetic process|nitrate assimilation	-	-
XM_020818798.2	669.909	955.25	384.568	0.402583	-1.31264	0.025854	0.114461	Down	24.4317	13.505	20.3281	9.14644	6.87463	9.49208	1958	110093803	LOC110093803	uncharacterized WD repeat-containing protein C17D11.16-like, transcript variant X1	GO:0005829,GO:0005730,GO:0005634,GO:0006364	cytosol|nucleolus|nucleus|rRNA processing	-	-
XM_020818800.2	683.919	372.083	995.755	2.67616	1.42017	0.0146128	0.0750212	Up	3.35723	14.7227	5.81779	18.8334	27.4291	23.3497	1859	110093803	LOC110093803	uncharacterized WD repeat-containing protein C17D11.16-like, transcript variant X2	GO:0005829,GO:0005730,GO:0005634,GO:0006364	cytosol|nucleolus|nucleus|rRNA processing	-	-
XM_020818801.2	42.8623	81.8838	3.84088	0.0469064	-4.41407	2.22127e-05	0.000409592	Down	4.67067	5.13081	4.35388	0.34806	0.221057	0.141179	690	110093804	LOC110093804	uncharacterized LOC110093804	-	-	-	-
XM_020818805.2	45.3326	90.3429	0.322236	0.00356681	-8.13115	4.34814e-09	2.26547e-07	Down	5.84759	6.10428	6.32289	0	0.103254	0	590	110093808	LOC110093808	uncharacterized LOC110093808	-	-	-	-
XM_020818819.2	105.612	0	211.225	Inf	Inf	9.11035e-16	2.19865e-13	Up	0.0147781	0	0	9.68241	9.17008	9.65044	964	110093821	LOC110093821	oleosin 16 kDa	GO:0016021,GO:0012511,GO:0019915	integral component of membrane|monolayer-surrounded lipid storage body|lipid storage	-	-
XM_020818821.2	754.865	1455.75	53.9752	0.0370771	-4.75333	4.21707e-12	4.54344e-10	Down	50.2677	53.9027	52.3255	1.84545	2.45114	2.01407	1111	110093823	LOC110093823	derlin-1.1, transcript variant X2	GO:0000839,GO:0030176,GO:0051787,GO:1990381,GO:0030968,GO:0030433	Hrd1p ubiquitin ligase ERAD-L complex|integral component of endoplasmic reticulum membrane|misfolded protein binding|ubiquitin-specific protease binding|endoplasmic reticulum unfolded protein response|ubiquitin-dependent ERAD pathway	path:dct04141	Protein processing in endoplasmic reticulum
XM_020818823.2	127.865	232.632	23.0987	0.0992932	-3.33216	7.88653e-06	0.000168018	Down	10.2778	6.62165	8.1593	0.929125	0.27321	1.53273	1107	110093823	LOC110093823	derlin-1.1, transcript variant X4	GO:0000839,GO:0030176,GO:0051787,GO:1990381,GO:0030968,GO:0030433	Hrd1p ubiquitin ligase ERAD-L complex|integral component of endoplasmic reticulum membrane|misfolded protein binding|ubiquitin-specific protease binding|endoplasmic reticulum unfolded protein response|ubiquitin-dependent ERAD pathway	path:dct04141	Protein processing in endoplasmic reticulum
XM_020818835.2	762.01	1215.11	308.915	0.254229	-1.9758	0.00108772	0.0101589	Down	45.9081	39.0541	37.1243	13.5466	8.79829	11.3882	1189	110093829	LOC110093829	GTP-binding protein YPTM2	GO:0005886,GO:0005525,GO:0003924,GO:0006886,GO:0032482	plasma membrane|GTP binding|GTPase activity|intracellular protein transport|Rab protein signal transduction	-	-
XM_020818837.2	23.1303	2.71401	43.5466	16.0451	4.00406	0.00139815	0.012398	Up	0.0371254	0.149162	0.0884492	1.23703	2.53979	1.14759	1150	110093831	LOC110093831	ATP-dependent Clp protease ATP-binding subunit CLPT1, chloroplastic, transcript variant X1	GO:0009507,GO:0009941,GO:0009570,GO:0005829,GO:0009532,GO:0009579,GO:0019538	chloroplast|chloroplast envelope|chloroplast stroma|cytosol|plastid stroma|thylakoid|protein metabolic process	-	-
XM_020818838.2	490.447	716.4	264.495	0.3692	-1.43752	0.0178538	0.087222	Down	22.9792	24.3522	27.336	10.2427	9.63701	10.0926	1146	110093831	LOC110093831	ATP-dependent Clp protease ATP-binding subunit CLPT1, chloroplastic, transcript variant X2	GO:0009507,GO:0009941,GO:0009570,GO:0005829,GO:0009532,GO:0009579,GO:0019538	chloroplast|chloroplast envelope|chloroplast stroma|cytosol|plastid stroma|thylakoid|protein metabolic process	-	-
XM_020818843.2	824.402	497.554	1151.25	2.31382	1.21028	0.0416313	0.161219	Up	5.98609	5.18883	8.37594	16.3796	17.1028	15.7589	3038	110093828	LOC110093828	potassium transporter 6-like, transcript variant X2	GO:0016021,GO:0005886,GO:0015079,GO:0006813	integral component of membrane|plasma membrane|potassium ion transmembrane transporter activity|potassium ion transport	-	-
XM_020818844.2	345.327	119.549	571.105	4.77716	2.25615	0.000401212	0.00450442	Up	3.11733	3.09415	2.98548	16.289	15.9043	15.5971	1552	110093834	LOC110093834	protein ORANGE-GREEN, chloroplastic	GO:0009507,GO:0031969,GO:0016021	chloroplast|chloroplast membrane|integral component of membrane	-	-
XM_020818851.2	72.167	119.391	24.9432	0.208921	-2.25897	0.00456968	0.0314089	Down	2.95754	2.62954	2.45325	0.470791	0.714482	0.667182	1771	110093837	LOC110093837	ethylene-responsive transcription factor 5-like	GO:0005634,GO:0003677,GO:0003700,GO:0006952,GO:0009873	nucleus|DNA binding|DNA-binding transcription factor activity|defense response|ethylene-activated signaling pathway	-	-
XM_020818853.2	201.539	67.9073	335.17	4.9357	2.30325	0.000595804	0.00623002	Up	3.01007	3.77998	3.91374	19.1716	19.6447	18.7176	757	110093840	LOC110093840	uncharacterized LOC110093840	-	-	-	-
XM_020818866.2	5757.93	11483.1	32.7579	0.00285271	-8.45345	4.82276e-27	1.45488e-23	Down	503.471	493.436	501.856	1.17532	1.62578	1.84766	915	110093850	LOC110093850	21 kDa protein	GO:0004857	enzyme inhibitor activity	-	-
XM_020818871.2	99.8734	148.778	50.9684	0.34258	-1.54549	0.0374867	0.149676	Down	1.09813	2.99319	2.18446	1.21576	0.561583	0.574503	2829	110093853	LOC110093853	endonuclease MutS2, transcript variant X5	GO:0032302,GO:0005524,GO:0000406,GO:0000404,GO:0000403,GO:0000710,GO:0006312,GO:0000735,GO:0043111	MutSbeta complex|ATP binding|double-strand/single-strand DNA junction binding|heteroduplex DNA loop binding|Y-form DNA binding|meiotic mismatch repair|mitotic recombination|removal of nonhomologous ends|replication fork arrest	-	-
XM_020818875.2	242.751	21.099	464.403	22.0107	4.46013	1.16512e-09	7.04374e-08	Up	0.517148	0.330594	0.398291	9.92655	10.324	9.87539	2003	110093855	LOC110093855	vacuolar-processing enzyme	GO:0008234	cysteine-type peptidase activity	-	-
XM_020818881.2	39.6668	75.1169	4.21661	0.056134	-4.15498	6.97794e-05	0.00106422	Down	1.03602	1.12947	1.14372	0.0880443	0.00459938	0.116112	2711	110093857	LOC110093857	DNA replication licensing factor MCM3-like, transcript variant X1	GO:0042555,GO:0005634,GO:0000347,GO:0005524,GO:0003678,GO:0003688,GO:0003697,GO:0006271,GO:0000727,GO:1902975,GO:0006267	MCM complex|nucleus|THO complex|ATP binding|DNA helicase activity|DNA replication origin binding|single-stranded DNA binding|DNA strand elongation involved in DNA replication|double-strand break repair via break-induced replication|mitotic DNA replication initiation|pre-replicative complex assembly involved in nuclear cell cycle DNA replication	path:dct03030	DNA replication
XM_020818889.2	134.581	260.745	8.41638	0.0322782	-4.9533	1.21235e-09	7.31457e-08	Down	4.09222	3.44643	3.96121	0.0974283	0.191007	0.130484	2708	110093857	LOC110093857	DNA replication licensing factor MCM3-like, transcript variant X2	GO:0042555,GO:0005634,GO:0000347,GO:0005524,GO:0003678,GO:0003688,GO:0003697,GO:0006271,GO:0000727,GO:1902975,GO:0006267	MCM complex|nucleus|THO complex|ATP binding|DNA helicase activity|DNA replication origin binding|single-stranded DNA binding|DNA strand elongation involved in DNA replication|double-strand break repair via break-induced replication|mitotic DNA replication initiation|pre-replicative complex assembly involved in nuclear cell cycle DNA replication	path:dct03030	DNA replication
XM_020818890.2	87.548	6.71932	168.377	25.0586	4.64723	8.98545e-08	3.43554e-06	Up	0.0771984	0.258236	0.258546	5.52556	5.28069	4.85119	1397	110093862	LOC110093862	protein YABBY 4	GO:0005634,GO:0046872,GO:0010158,GO:0045165,GO:0010154,GO:0009944,GO:2000024,GO:1902183	nucleus|metal ion binding|abaxial cell fate specification|cell fate commitment|fruit development|polarity specification of adaxial/abaxial axis|regulation of leaf development|regulation of shoot apical meristem development	-	-
XM_020818891.2	135.684	219.669	51.6986	0.235348	-2.08714	0.00299685	0.0226071	Down	19.1434	20.3685	17.0335	4.75879	4.78213	4.92149	464	110093863	LOC110093863	histone H4	GO:0009507,GO:0005829,GO:0005730,GO:0000786,GO:0005886,GO:0009506,GO:0009579,GO:0005774,GO:0003677,GO:0046982,GO:0006334,GO:0009414	chloroplast|cytosol|nucleolus|nucleosome|plasma membrane|plasmodesma|thylakoid|vacuolar membrane|DNA binding|protein heterodimerization activity|nucleosome assembly|response to water deprivation	-	-
XM_020818896.2	40.7799	78.9922	2.56772	0.032506	-4.94315	6.66158e-06	0.000145518	Down	0.918811	1.11841	0.99117	0.0491913	0.0255741	0.0267146	3105	110093869	LOC110093869	putative receptor-like protein kinase At3g47110	-	-	-	-
XM_020818897.2	177.234	252.367	102.102	0.404576	-1.30552	0.0486684	0.1803	Down	10.264	10.8737	11.8595	5.70846	4.55756	4.25923	913	110093871	LOC110093871	uncharacterized LOC110093871	-	-	-	-
XM_020818898.2	10.4488	20.8975	0	0	#NAME?	0.00147397	0.0129268	Down	0.572729	3.93952e-07	0.628716	1.16424e-08	3.79189e-13	4.22138e-12	2075	110093872	LOC110093872	nuclear pore complex protein GP210-like	GO:0005783,GO:0016021,GO:0005635,GO:0031965,GO:0005643,GO:0051028,GO:0015031	endoplasmic reticulum|integral component of membrane|nuclear envelope|nuclear membrane|nuclear pore|mRNA transport|protein transport	-	-
XM_020818908.2	62.8784	23.6966	102.06	4.30695	2.10667	0.0111097	0.0615623	Up	0.234095	0.0715006	1.12697	3.50445	1.2969	1.90548	1978	110093881	LOC110093881	INO80 complex subunit D-like, transcript variant X2	-	-	-	-
XM_020818923.2	1579.94	826.896	2332.98	2.82137	1.4964	0.0105508	0.0592157	Up	13.8187	14.0635	14.2128	42.3186	43.6086	43.273	2346	110093888	LOC110093888	DEAD-box ATP-dependent RNA helicase 35	GO:0005681,GO:0005524,GO:0003723,GO:0003724,GO:0008270,GO:0000398	spliceosomal complex|ATP binding|RNA binding|RNA helicase activity|zinc ion binding|mRNA splicing, via spliceosome	-	-
XM_020818929.2	763.905	1233.3	294.509	0.238797	-2.06614	0.000663717	0.00682658	Down	19.0766	19.1844	19.0719	4.94873	5.07433	4.87331	2569	110093892	LOC110093892	probable metal-nicotianamine transporter YSL12	GO:0016021,GO:0005886,GO:0055085	integral component of membrane|plasma membrane|transmembrane transport	-	-
XM_020818931.2	10.2148	20.4295	0	0	#NAME?	0.00172058	0.0146873	Down	2.00117e-44	1.80027e-47	2.3821	7.14579e-41	4.12859e-41	2.34797e-21	1029	110093893	LOC110093893	ubiquitin-conjugating enzyme E2 5	GO:0005829,GO:0005524,GO:0061631,GO:0004842,GO:0006511	cytosol|ATP binding|ubiquitin conjugating enzyme activity|ubiquitin-protein transferase activity|ubiquitin-dependent protein catabolic process	path:dct04120	Ubiquitin mediated proteolysis
XM_020818938.2	140.002	201.643	78.3606	0.388611	-1.3636	0.0450839	0.170924	Down	3.13181	2.83195	2.72248	1.1437	1.06423	1.45482	2774	110093900	LOC110093900	uncharacterized LOC110093900	-	-	-	-
XM_020818939.2	387.708	648.732	126.683	0.195278	-2.3564	0.000200278	0.00256957	Down	11.5692	12.2498	12.8225	1.79113	3.27309	2.73102	2114	110093901	LOC110093901	two-component response regulator-like PRR1, transcript variant X1	GO:0005634,GO:0000160,GO:0048511	nucleus|phosphorelay signal transduction system|rhythmic process	path:dct04712	Circadian rhythm - plant
XM_020818952.2	381.948	207.176	556.719	2.68718	1.42609	0.0210296	0.0985247	Up	7.24049	6.03946	6.57554	19.0481	20.2429	18.8251	1245	110093910	LOC110093910	uncharacterized LOC110093910	-	-	-	-
XM_020818961.2	65.7755	101.669	29.8815	0.293908	-1.76656	0.0282157	0.121963	Down	1.25677	1.31324	1.29008	0.441933	0.561425	0.23278	3139	110093912	LOC110093912	DNA (cytosine-5)-methyltransferase 1	GO:0005634,GO:0003682,GO:0003886,GO:0003677,GO:0006325,GO:0010424,GO:0010216	nucleus|chromatin binding|DNA (cytosine-5-)-methyltransferase activity|DNA binding|chromatin organization|DNA methylation on cytosine within a CG sequence|maintenance of DNA methylation	path:dct00270,path:dct01100	Cysteine and methionine metabolism|Metabolic pathways
XM_020818969.2	86.6555	145.544	27.7672	0.190783	-2.39	0.00195017	0.0161801	Down	3.44452	3.34521	2.86926	0.708311	0.624916	0.687728	1798	110093917	LOC110093917	pentatricopeptide repeat-containing protein At4g21065-like	-	-	-	-
XM_020818971.2	1552.6	927.35	2177.85	2.34846	1.23172	0.0339581	0.1393	Up	16.9629	18.3691	18.4994	45.969	44.947	46.6292	2057	110093918	LOC110093918	RNA-binding protein 39	GO:0005634,GO:1990904,GO:0005681,GO:0003729,GO:0003723,GO:1990446,GO:0045292,GO:0006397	nucleus|ribonucleoprotein complex|spliceosomal complex|mRNA binding|RNA binding|U1 snRNP binding|mRNA cis splicing, via spliceosome|mRNA processing	-	-
XM_020818976.2	103.016	3.63797	202.394	55.6338	5.79789	1.92464e-10	1.40583e-08	Up	0.112862	0.0774932	0.0965914	6.00237	6.16183	5.6744	1474	110093920	LOC110093920	dihydroflavonol 4-reductase, transcript variant X1	GO:0042406,GO:0050662,GO:0045552,GO:0047890,GO:0016491,GO:0016616,GO:0009718	extrinsic component of endoplasmic reticulum membrane|coenzyme binding|dihydrokaempferol 4-reductase activity|flavanone 4-reductase activity|oxidoreductase activity|oxidoreductase activity, acting on the CH-OH group of donors, NAD or NADP as acceptor|anthocyanin-containing compound biosynthetic process	-	-
XM_020818981.2	70.1173	22.5284	117.706	5.22479	2.38537	0.00345122	0.025307	Up	0.699369	0.247017	0.534219	3.0344	2.81315	2.58467	1815	110093923	LOC110093923	polypyrimidine tract-binding protein homolog 3, transcript variant X1	GO:0005737,GO:0005634,GO:0000932,GO:0003729,GO:0006397,GO:0043484,GO:0006417,GO:0008380	cytoplasm|nucleus|P-body|mRNA binding|mRNA processing|regulation of RNA splicing|regulation of translation|RNA splicing	-	-
XM_020818983.2	861.915	410.362	1313.47	3.20075	1.67841	0.00530726	0.035273	Up	24.8588	11.5361	21.0091	80.2721	63.9337	55.5657	854	110093924	LOC110093924	protein translation factor SUI1 homolog 1, transcript variant X2	GO:0005829,GO:0003723,GO:0003743	cytosol|RNA binding|translation initiation factor activity	path:dct03013	RNA transport
XM_020818985.2	42.942	3.6752	82.2088	22.3685	4.4834	1.73519e-05	0.000332987	Up	0.0915506	0.135467	0.128269	2.43985	2.62338	3.00526	1325	110093926	LOC110093926	ethylene-responsive transcription factor ERF110	GO:0005634,GO:0003677,GO:0003700,GO:0009873,GO:0045893,GO:0048510	nucleus|DNA binding|DNA-binding transcription factor activity|ethylene-activated signaling pathway|positive regulation of transcription, DNA-templated|regulation of timing of transition from vegetative to reproductive phase	-	-
XM_020818990.2	190.799	91.3932	290.205	3.17534	1.66691	0.0114368	0.0628097	Up	3.14328	2.43618	0.975124	8.19277	8.31414	6.12901	1665	110093929	LOC110093929	uncharacterized LOC110093929, transcript variant X1	-	-	-	-
XM_020818996.2	16.3302	0	32.6604	Inf	Inf	7.22671e-05	0.00109662	Up	0	0	0	1.28256	0.909123	1.39914	1184	110093936	LOC110093936	homeobox-leucine zipper protein HOX21	GO:0005634,GO:0003700,GO:0043565,GO:0048826,GO:0009965,GO:0045893,GO:0080022,GO:0009744	nucleus|DNA-binding transcription factor activity|sequence-specific DNA binding|cotyledon morphogenesis|leaf morphogenesis|positive regulation of transcription, DNA-templated|primary root development|response to sucrose	-	-
XM_020819022.2	38.3547	14.012	62.6975	4.47457	2.16175	0.0258496	0.114459	Up	0.360797	0.000252643	1.46487e-06	0.576188	0.862895	0.333294	4594	110093951	LOC110093951	kinesin-like protein KIN-14I, transcript variant X3	GO:0005737,GO:0005871,GO:0005874,GO:0005524,GO:0016887,GO:0005516,GO:0008017,GO:0003777,GO:0016491,GO:0007018	cytoplasm|kinesin complex|microtubule|ATP binding|ATPase activity|calmodulin binding|microtubule binding|microtubule motor activity|oxidoreductase activity|microtubule-based movement	-	-
XM_020819036.2	297.681	445.074	150.288	0.337669	-1.56632	0.0125853	0.0674538	Down	21.6653	17.8786	19.5125	6.89012	7.3734	7.41253	900	110093961	LOC110093961	60S ribosomal protein L30	GO:0022625,GO:0003723,GO:0003735	cytosolic large ribosomal subunit|RNA binding|structural constituent of ribosome	path:dct03010	Ribosome
XM_020819044.2	243.073	465.456	20.6899	0.0444509	-4.49164	8.35194e-10	5.24902e-08	Down	14.2687	13.4429	13.438	0.613521	0.706721	0.676161	1351	110093969	LOC110093969	probable WRKY transcription factor 53, transcript variant X1	GO:0009507,GO:0005634,GO:0003677,GO:0003700,GO:0043565,GO:0044212,GO:0042742,GO:0009816,GO:0010150,GO:0045893,GO:0031347,GO:2000022,GO:0009617,GO:0010200,GO:0042542,GO:0010193,GO:0009751	chloroplast|nucleus|DNA binding|DNA-binding transcription factor activity|sequence-specific DNA binding|transcription regulatory region DNA binding|defense response to bacterium|defense response to bacterium, incompatible interaction|leaf senescence|positive regulation of transcription, DNA-templated|regulation of defense response|regulation of jasmonic acid mediated signaling pathway|response to…	-	-
XM_020819045.1	19.4568	38.9137	0	0	#NAME?	1.4546e-05	0.000287366	Down	6.67581	6.24665	2.7751e-11	7.80551e-12	1.6317e-09	2.97711e-10	360	110093970	LOC110093970	F-box protein At1g55000-like	GO:0016567	protein ubiquitination	-	-
XM_020819049.2	219.141	114.543	323.738	2.82634	1.49894	0.0202262	0.095802	Up	2.90496	3.02989	2.23169	8.44054	8.7499	7.91407	1675	110093973	LOC110093973	F-box protein At5g49610, transcript variant X2	GO:0016567	protein ubiquitination	-	-
XM_020819051.2	1276.64	1871.17	682.109	0.364537	-1.45586	0.0127177	0.0678699	Down	97.0303	91.4761	90.8453	30.9442	34.6602	45.2597	800	110093974	LOC110093974	60S ribosomal protein L23A	GO:0005840,GO:0019843,GO:0003735,GO:0006412	ribosome|rRNA binding|structural constituent of ribosome|translation	path:dct03010	Ribosome
XM_020819061.2	203.014	68.924	337.104	4.89096	2.29012	0.0007613	0.00763133	Up	4.17397	1.70955	0.385175	0.00274573	18.3031	15.0421	1315	110093981	LOC110093981	aldo-keto reductase family 4 member C10-like, transcript variant X2	GO:0009507,GO:0005829,GO:0005783,GO:0008106,GO:0004032,GO:0004033,GO:0070401,GO:0016491,GO:0016229,GO:0055114,GO:0009409,GO:0009651,GO:0009636,GO:0009414	chloroplast|cytosol|endoplasmic reticulum|alcohol dehydrogenase (NADP+) activity|alditol:NADP+ 1-oxidoreductase activity|aldo-keto reductase (NADP) activity|NADP+ binding|oxidoreductase activity|steroid dehydrogenase activity|oxidation-reduction process|response to cold|response to salt stress|response to toxic substance|response to water deprivation	path:dct00010,path:dct00040,path:dct00561,path:dct01100,path:dct01110	Glycolysis / Gluconeogenesis|Pentose and glucuronate interconversions|Glycerolipid metabolism|Metabolic pathways|Biosynthesis of secondary metabolites
XM_020819063.2	154.232	86.9041	221.559	2.54947	1.3502	0.0429324	0.165011	Up	1.902	2.63342	2.09575	7.89923	4.56683	5.86742	1570	110093981	LOC110093981	aldo-keto reductase family 4 member C10-like, transcript variant X4	GO:0009507,GO:0005829,GO:0005783,GO:0008106,GO:0004032,GO:0004033,GO:0070401,GO:0016491,GO:0016229,GO:0055114,GO:0009409,GO:0009651,GO:0009636,GO:0009414	chloroplast|cytosol|endoplasmic reticulum|alcohol dehydrogenase (NADP+) activity|alditol:NADP+ 1-oxidoreductase activity|aldo-keto reductase (NADP) activity|NADP+ binding|oxidoreductase activity|steroid dehydrogenase activity|oxidation-reduction process|response to cold|response to salt stress|response to toxic substance|response to water deprivation	path:dct00010,path:dct00040,path:dct00561,path:dct01100,path:dct01110	Glycolysis / Gluconeogenesis|Pentose and glucuronate interconversions|Glycerolipid metabolism|Metabolic pathways|Biosynthesis of secondary metabolites
XM_020819066.2	327.698	588.573	66.8238	0.113535	-3.13879	2.52891e-06	6.3734e-05	Down	12.9872	18.4873	12.1816	2.14803	1.25033	1.98108	1610	110093981	LOC110093981	aldo-keto reductase family 4 member C10-like, transcript variant X7	GO:0009507,GO:0005829,GO:0005783,GO:0008106,GO:0004032,GO:0004033,GO:0070401,GO:0016491,GO:0016229,GO:0055114,GO:0009409,GO:0009651,GO:0009636,GO:0009414	chloroplast|cytosol|endoplasmic reticulum|alcohol dehydrogenase (NADP+) activity|alditol:NADP+ 1-oxidoreductase activity|aldo-keto reductase (NADP) activity|NADP+ binding|oxidoreductase activity|steroid dehydrogenase activity|oxidation-reduction process|response to cold|response to salt stress|response to toxic substance|response to water deprivation	path:dct00010,path:dct00040,path:dct00561,path:dct01100,path:dct01110	Glycolysis / Gluconeogenesis|Pentose and glucuronate interconversions|Glycerolipid metabolism|Metabolic pathways|Biosynthesis of secondary metabolites
XM_020819067.2	99.2824	167.327	31.238	0.186688	-2.4213	0.00124271	0.0113123	Down	2.25686	1.81917	2.7647	0.549189	0.449635	0.406685	2918	110093982	LOC110093982	G-type lectin S-receptor-like serine/threonine-protein kinase B120, transcript variant X1	-	-	-	-
XM_020819068.2	142.993	7.08222	278.904	39.3808	5.29942	8.55526e-11	6.79175e-09	Up	0.000776354	0.483019	0.0129835	11.0157	4.5425	5.95078	1682	110093981	LOC110093981	aldo-keto reductase family 4 member C10-like, transcript variant X6	GO:0009507,GO:0005829,GO:0005783,GO:0008106,GO:0004032,GO:0004033,GO:0070401,GO:0016491,GO:0016229,GO:0055114,GO:0009409,GO:0009651,GO:0009636,GO:0009414	chloroplast|cytosol|endoplasmic reticulum|alcohol dehydrogenase (NADP+) activity|alditol:NADP+ 1-oxidoreductase activity|aldo-keto reductase (NADP) activity|NADP+ binding|oxidoreductase activity|steroid dehydrogenase activity|oxidation-reduction process|response to cold|response to salt stress|response to toxic substance|response to water deprivation	path:dct00010,path:dct00040,path:dct00561,path:dct01100,path:dct01110	Glycolysis / Gluconeogenesis|Pentose and glucuronate interconversions|Glycerolipid metabolism|Metabolic pathways|Biosynthesis of secondary metabolites
XM_020819070.2	74.895	14.6205	135.169	9.24518	3.2087	0.000109202	0.00155099	Up	0.550857	0.607729	0.560247	5.2661	6.01808	6.01909	1013	110093984	LOC110093984	uncharacterized LOC110093984	-	-	-	-
XM_020819097.2	34.8062	5.64062	63.9717	11.3412	3.50351	0.000845432	0.00828325	Up	0.266166	0.286124	0.397595	3.65074	4.16486	3.82688	715	110094006	LOC110094006	auxin-responsive protein SAUR71-like	GO:0005737,GO:0009734,GO:0007275,GO:0040008	cytoplasm|auxin-activated signaling pathway|multicellular organism development|regulation of growth	-	-
XM_020819100.2	872.382	410.545	1334.22	3.24987	1.70038	0.00442238	0.0306478	Up	8.95039	8.18016	8.12828	31.4647	28.6671	29.1034	1942	110094002	LOC110094002	sorting nexin 2B, transcript variant X2	GO:0005829,GO:0005794,GO:0016020,GO:0032585,GO:0030904,GO:0035091,GO:0005543,GO:0046982,GO:0032502,GO:0045324,GO:0051604,GO:0015031,GO:0090351,GO:0016192	cytosol|Golgi apparatus|membrane|multivesicular body membrane|retromer complex|phosphatidylinositol binding|phospholipid binding|protein heterodimerization activity|developmental process|late endosome to vacuole transport|protein maturation|protein transport|seedling development|vesicle-mediated transport	-	-
XM_020819106.2	3161.83	5073.83	1249.83	0.246328	-2.02135	0.000600242	0.00626991	Down	214.282	211.497	220.199	59.2431	56.6628	57.1976	938	110094013	LOC110094013	ATP synthase subunit b', chloroplastic	GO:0009535,GO:0016021,GO:0045263,GO:0005524,GO:0015078,GO:0015986	chloroplast thylakoid membrane|integral component of membrane|proton-transporting ATP synthase complex, coupling factor F(o)|ATP binding|proton transmembrane transporter activity|ATP synthesis coupled proton transport	path:dct00190,path:dct00195,path:dct01100	Oxidative phosphorylation|Photosynthesis|Metabolic pathways
XM_020819107.2	302.712	445.207	160.217	0.35987	-1.47445	0.018713	0.0905687	Down	9.04697	9.60897	8.98359	3.5872	2.94213	4.30633	1924	110094014	LOC110094014	probable receptor-like protein kinase At1g80640	-	-	-	-
XM_020819113.2	628.737	385.496	871.978	2.26197	1.17758	0.0477759	0.178087	Up	6.29234	7.38118	8.45698	18.9103	18.2021	17.385	2079	110094019	LOC110094019	probable anion transporter 6, chloroplastic, transcript variant X1	GO:0031969,GO:0005887,GO:0009536,GO:0005315	chloroplast membrane|integral component of plasma membrane|plastid|inorganic phosphate transmembrane transporter activity	-	-
XM_020819114.2	7.86098	15.0561	0.665872	0.0442261	-4.49896	0.0363962	0.146689	Down	0.681753	0.262979	0.134203	1.44126e-19	4.55029e-10	0.045253	1653	110094019	LOC110094019	probable anion transporter 6, chloroplastic, transcript variant X3	GO:0031969,GO:0005887,GO:0009536,GO:0005315	chloroplast membrane|integral component of plasma membrane|plastid|inorganic phosphate transmembrane transporter activity	-	-
XM_020819116.2	202.44	108.244	296.636	2.74043	1.4544	0.0258749	0.114503	Up	2.21569	2.08884	1.88947	6.24156	5.71607	6.51088	2087	110094021	LOC110094021	pentatricopeptide repeat-containing protein At1g09900-like	-	-	-	-
XM_020819127.2	45.4876	80.9921	9.98301	0.123259	-3.02024	0.00126422	0.0114596	Down	2.59223	2.46231	2.33774	0.417583	0.272616	0.28952	1311	110094025	LOC110094025	protein PHYTOCHROME KINASE SUBSTRATE 1-like	-	-	-	-
XM_020819128.2	37.5945	0	75.1889	Inf	Inf	9.27255e-09	4.45422e-07	Up	3.00906e-19	1.70023e-27	1.78641e-22	8.69555	7.4001	4.95368	463	110094026	LOC110094026	uncharacterized LOC110094026, transcript variant X2	-	-	-	-
XM_020819129.2	64.3074	1.67255	126.942	75.8975	6.24598	3.36345e-09	1.80543e-07	Up	0.0427791	0.0626531	0.0284424	3.97622	4.29213	4.06217	1340	110094027	LOC110094027	putative glutamine amidotransferase GAT1_2.1	GO:0016787,GO:0016740,GO:0006541,GO:2000032	hydrolase activity|transferase activity|glutamine metabolic process|regulation of secondary shoot formation	-	-
XM_020819135.2	24.5142	48.3626	0.665872	0.0137683	-6.1825	2.41033e-05	0.00043882	Down	0.714349	1.3784	0.545702	0.000486536	4.07918e-05	0.0467118	2202	110094030	LOC110094030	DNA topoisomerase 2-binding protein 1, transcript variant X1	-	-	-	-
XM_020819146.2	25.6904	43.1082	8.27271	0.191906	-2.38153	0.0311694	0.13073	Down	0.302812	0.882329	0.208061	0.0157974	0.0320016	0.248898	3704	110094033	LOC110094033	PH, RCC1 and FYVE domains-containing protein 1, transcript variant X4	GO:0046872,GO:0070300,GO:0035091,GO:0017112	metal ion binding|phosphatidic acid binding|phosphatidylinositol binding|Rab guanyl-nucleotide exchange factor activity	-	-
XM_020819149.2	39.0213	62.8829	15.1597	0.241077	-2.05243	0.0273157	0.119237	Down	0.826425	0.391198	0.762509	0.0960566	0.334821	0.0859311	3795	110094033	LOC110094033	PH, RCC1 and FYVE domains-containing protein 1, transcript variant X7	GO:0046872,GO:0070300,GO:0035091,GO:0017112	metal ion binding|phosphatidic acid binding|phosphatidylinositol binding|Rab guanyl-nucleotide exchange factor activity	-	-
XM_020819153.2	12.1848	0	24.3696	Inf	Inf	0.000627758	0.00651094	Up	0	0	0	0.887545	0.35776	0.443402	1900	110094034	LOC110094034	alpha-humulene synthase, transcript variant X1	GO:0000287,GO:0010334,GO:0045338,GO:0051762,GO:0016114	magnesium ion binding|sesquiterpene synthase activity|farnesyl diphosphate metabolic process|sesquiterpene biosynthetic process|terpenoid biosynthetic process	path:dct00909	Sesquiterpenoid and triterpenoid biosynthesis
XM_020819154.2	49.5464	0	99.0928	Inf	Inf	2.0111e-10	1.45839e-08	Up	0	0	0	2.43406	2.58934	2.29979	1756	110094034	LOC110094034	alpha-humulene synthase, transcript variant X2	GO:0000287,GO:0010333	magnesium ion binding|terpene synthase activity	path:dct00909	Sesquiterpenoid and triterpenoid biosynthesis
XM_020819180.2	7.36005	0	14.7201	Inf	Inf	0.010228	0.0580197	Up	7.20325e-07	3.42638e-11	1.33392e-08	1.58408	3.63075e-16	0.758214	828	110094045	LOC110094045	protein COFACTOR ASSEMBLY OF COMPLEX C SUBUNIT B CCB4, chloroplastic, transcript variant X2	GO:0009507,GO:0009535,GO:0016021,GO:0010190	chloroplast|chloroplast thylakoid membrane|integral component of membrane|cytochrome b6f complex assembly	-	-
XM_020819182.2	16.8233	33.0179	0.628687	0.0190408	-5.71476	0.00058536	0.0061404	Down	0.0564368	0.866507	1.07457	0.0321646	3.84091e-09	0.00158158	1979	110094047	LOC110094047	senescence-associated protein OSA15, chloroplastic, transcript variant X1	GO:0009507,GO:0034599,GO:0010150	chloroplast|cellular response to oxidative stress|leaf senescence	-	-
XM_020819183.2	309.952	91.3265	528.577	5.78777	2.53301	0.000106114	0.0015193	Up	2.16614	1.2243	1.94387	12.0338	10.6086	10.9588	2044	110094047	LOC110094047	senescence-associated protein OSA15, chloroplastic, transcript variant X2	GO:0009507,GO:0034599,GO:0010150	chloroplast|cellular response to oxidative stress|leaf senescence	-	-
XM_020819192.2	10.3317	0	20.6635	Inf	Inf	0.00180049	0.0152443	Up	0	0	0	1.48872	1.57697	1.50027	591	110094051	LOC110094051	ribonuclease 3-like protein 3	GO:0046872,GO:0004525,GO:0003723,GO:0006396	metal ion binding|ribonuclease III activity|RNA binding|RNA processing	-	-
XM_020819197.2	72.4972	35.5548	109.44	3.07806	1.62202	0.0373768	0.149344	Up	0.400426	0.67173	1.11338	2.71283	2.07628	2.55912	1935	110094056	LOC110094056	protein MSP1, transcript variant X1	GO:0016021,GO:0005741,GO:0005739,GO:0005778,GO:0005524,GO:0016887,GO:0006626	integral component of membrane|mitochondrial outer membrane|mitochondrion|peroxisomal membrane|ATP binding|ATPase activity|protein targeting to mitochondrion	-	-
XM_020819198.2	9.51567	0.324279	18.7071	57.6882	5.85021	0.00871992	0.0513922	Up	1.89635e-13	7.97231e-09	0.0175138	0.235931	0.956417	0.227884	1725	110094056	LOC110094056	protein MSP1, transcript variant X3	GO:0005737,GO:0005634,GO:0000502,GO:0005524,GO:0016787,GO:0030163	cytoplasm|nucleus|proteasome complex|ATP binding|hydrolase activity|protein catabolic process	-	-
XM_020819204.2	84.9587	133.448	36.4698	0.273289	-1.8715	0.0120522	0.0653332	Down	2.34213	2.69958	7.33916	0.20284	1.13737	2.36106	1288	110094062	LOC110094062	proteasome subunit alpha type-4, transcript variant X1	GO:0005737,GO:0005634,GO:0019773,GO:0004298,GO:0006511	cytoplasm|nucleus|proteasome core complex, alpha-subunit complex|threonine-type endopeptidase activity|ubiquitin-dependent protein catabolic process	path:dct03050	Proteasome
XM_020819207.2	238.605	136.745	340.465	2.48979	1.31602	0.0398108	0.156194	Up	7.52531	5.91148	5.15449	17.1984	17.2747	15.8386	879	110094063	LOC110094063	GTPase activating protein 1, transcript variant X2	GO:0005829,GO:0005634,GO:0005886,GO:0005096,GO:0008289,GO:0046872,GO:0009738,GO:0006952,GO:1902479,GO:0043547,GO:1901002,GO:0009651,GO:0009611	cytosol|nucleus|plasma membrane|GTPase activator activity|lipid binding|metal ion binding|abscisic acid-activated signaling pathway|defense response|positive regulation of defense response to bacterium, incompatible interaction|positive regulation of GTPase activity|positive regulation of response to salt stress|response to salt stress|response to wounding	-	-
XM_020819214.2	75.2291	137.58	12.8786	0.0936082	-3.41722	4.45731e-05	0.000732773	Down	5.14065	4.94568	5.54828	0.718105	0.300202	0.543329	1051	110094069	LOC110094069	protein STRICTOSIDINE SYNTHASE-LIKE 10	GO:0005829,GO:0005783,GO:0009505,GO:0005886,GO:0009506,GO:0005773,GO:0009058	cytosol|endoplasmic reticulum|plant-type cell wall|plasma membrane|plasmodesma|vacuole|biosynthetic process	-	-
XM_020819216.2	1185.69	0	2371.38	Inf	Inf	1.11069e-33	3.35061e-29	Up	0	0	0	60.1374	65.2883	56.6374	1692	110094071	LOC110094071	alpha-humulene synthase-like	GO:0000287,GO:0010334,GO:0045338,GO:0051762,GO:0016114	magnesium ion binding|sesquiterpene synthase activity|farnesyl diphosphate metabolic process|sesquiterpene biosynthetic process|terpenoid biosynthetic process	path:dct00909	Sesquiterpenoid and triterpenoid biosynthesis
XM_020819220.2	1324.52	2073.24	575.805	0.277732	-1.84823	0.00181835	0.015338	Down	89.366	79.7872	80.9492	25.8032	25.6856	24.1114	990	110094076	LOC110094076	nucleolin	-	-	-	-
XM_020819221.2	401.921	239.121	564.722	2.36166	1.2398	0.040613	0.158578	Up	4.35136	6.28299	4.34685	12.2005	13.6154	12.6703	1906	110094077	LOC110094077	BRCA1-associated protein, transcript variant X1	GO:0000151,GO:0046982,GO:0043130,GO:0004842,GO:0008270,GO:0010029	ubiquitin ligase complex|protein heterodimerization activity|ubiquitin binding|ubiquitin-protein transferase activity|zinc ion binding|regulation of seed germination	-	-
XM_020819222.2	258.78	88.1379	429.422	4.87216	2.28456	0.00048382	0.00523508	Up	3.32989	3.25555	4.0337	19.3129	18.3005	18.6376	992	110094078	LOC110094078	uncharacterized LOC110094078	-	-	-	-
XM_020819232.2	101.361	166.593	36.1283	0.216866	-2.20513	0.00299545	0.0226022	Down	7.55678	8.544	8.71812	2.21886	1.67446	1.97413	802	110094083	LOC110094083	transcription factor HY5-like	GO:0005634,GO:0003700,GO:0043565,GO:0010017,GO:0009585,GO:0010099,GO:0010218,GO:0080167,GO:0010114,GO:0010224	nucleus|DNA-binding transcription factor activity|sequence-specific DNA binding|red or far-red light signaling pathway|red, far-red light phototransduction|regulation of photomorphogenesis|response to far red light|response to karrikin|response to red light|response to UV-B	path:dct04712	Circadian rhythm - plant
XM_020819235.2	86.8654	27.3255	146.405	5.35782	2.42165	0.0016666	0.0143028	Up	0.862024	0.715915	0.202048	3.68174	3.61399	3.13723	1820	110094086	LOC110094086	transcription initiation factor TFIID subunit 15b, transcript variant X1	GO:0009507,GO:0005634,GO:0046872,GO:0003723	chloroplast|nucleus|metal ion binding|RNA binding	path:dct03013,path:dct03015,path:dct03040	RNA transport|mRNA surveillance pathway|Spliceosome
XM_020819236.2	261.874	521.418	2.33055	0.00446964	-7.80563	2.11942e-18	9.40245e-16	Down	18.7168	21.5242	19.5086	7.33813e-06	6.25739e-06	0.305208	1042	110094057	LOC110094057	probable WRKY transcription factor 26, transcript variant X1	GO:0005634,GO:0003700,GO:0043565	nucleus|DNA-binding transcription factor activity|sequence-specific DNA binding	-	-
XM_020819247.2	531.447	229.714	833.18	3.62704	1.85879	0.00240623	0.0190272	Up	4.65974	4.52731	4.40516	17.3973	18.245	17.9702	2019	110094094	LOC110094094	transcription factor ABA-INDUCIBLE bHLH-TYPE-like	GO:0005634,GO:0046983,GO:0006952,GO:0031347,GO:2000022,GO:0006355	nucleus|protein dimerization activity|defense response|regulation of defense response|regulation of jasmonic acid mediated signaling pathway|regulation of transcription, DNA-templated	-	-
XM_020819264.2	12.2047	0.355681	24.0537	67.627	6.07953	0.00231913	0.0184789	Up	0.00306065	0.00940141	3.04547e-05	0.0807214	0.16897	0.754082	3098	110094110	LOC110094110	disease resistance protein RPM1-like, transcript variant X1	-	-	path:dct04626	Plant-pathogen interaction
XM_020819275.2	206.368	406.932	5.80358	0.0142618	-6.1317	9.90624e-14	1.60667e-11	Down	28.3096	26.334	29.7621	0.368333	0.662443	0.302859	576	110094121	LOC110094121	histone H4	GO:0009507,GO:0005829,GO:0005730,GO:0000786,GO:0005886,GO:0009506,GO:0009579,GO:0005774,GO:0003677,GO:0046982,GO:0006334,GO:0009414	chloroplast|cytosol|nucleolus|nucleosome|plasma membrane|plasmodesma|thylakoid|vacuolar membrane|DNA binding|protein heterodimerization activity|nucleosome assembly|response to water deprivation	-	-
XM_020819278.2	21.5002	4.76782	38.2326	8.01888	3.0034	0.0129267	0.0687034	Up	0.125232	0.317339	0.0549286	0.803137	2.42688	1.42207	1073	110094122	LOC110094122	coiled-coil domain-containing protein 115, transcript variant X3	-	-	-	-
XM_020819286.2	1063.66	454.825	1672.5	3.67723	1.87862	0.00166701	0.0143028	Up	16.567	15.3131	16.2044	63.3986	68.3626	60.5474	1130	110094125	LOC110094125	uncharacterized LOC110094125	-	-	-	-
XM_020819294.2	102.853	55.5461	150.161	2.70335	1.43475	0.045784	0.17284	Up	1.15282	1.15221	0.892146	3.36782	3.41481	2.63674	2073	110094138	LOC110094138	zinc finger MYM-type protein 1-like	-	-	-	-
XM_020819297.2	120.977	43.4449	198.508	4.56921	2.19194	0.0020928	0.0171419	Up	0.78726	2.01078	1.56878	4.59695	12.3546	4.75058	1188	110094141	LOC110094141	josephin-like protein, transcript variant X3	GO:0000166,GO:0004843,GO:0016579	nucleotide binding|thiol-dependent ubiquitin-specific protease activity|protein deubiquitination	-	-
XM_020819299.2	1032.33	91.0479	1973.61	21.6766	4.43807	3.33581e-11	2.91685e-09	Up	4.0265	3.01083	4.30746	88.5849	86.3811	92.4567	959	110094141	LOC110094141	josephin-like protein, transcript variant X1	GO:0000166,GO:0004843,GO:0016579	nucleotide binding|thiol-dependent ubiquitin-specific protease activity|protein deubiquitination	-	-
XM_020819300.2	113.572	58.8912	168.253	2.85701	1.51451	0.0352707	0.143398	Up	4.26823	1.1856	2.37441	10.1811	8.78142	5.29427	900	110094141	LOC110094141	josephin-like protein, transcript variant X6	GO:0000166,GO:0004843,GO:0016579	nucleotide binding|thiol-dependent ubiquitin-specific protease activity|protein deubiquitination	-	-
XM_020819306.2	5727.37	10599.6	855.194	0.0806821	-3.63161	6.95282e-09	3.44977e-07	Down	435.576	440.368	441.275	40.6416	37.6656	37.2777	961	110094146	LOC110094146	uncharacterized LOC110094146	-	-	-	-
XM_020819315.2	2832.41	4901.18	763.643	0.155808	-2.68216	9.16269e-06	0.000191155	Down	102.008	100.347	98.9031	17.0484	17.3937	16.6316	1943	110094152	LOC110094152	uncharacterized LOC110094152	-	-	-	-
XM_020819316.2	9471.96	13451.1	5492.8	0.408353	-1.29211	0.0242392	0.109364	Down	362.305	366.264	361.231	162.597	160.139	161.398	1474	110094154	LOC110094154	60S acidic ribosomal protein P0	GO:0022625,GO:0022626,GO:0005794,GO:0070180,GO:0003735,GO:0002181,GO:0000027	cytosolic large ribosomal subunit|cytosolic ribosome|Golgi apparatus|large ribosomal subunit rRNA binding|structural constituent of ribosome|cytoplasmic translation|ribosomal large subunit assembly	path:dct03010	Ribosome
XM_020819318.2	19.9395	0.955361	38.9237	40.7424	5.34846	0.000357919	0.00411171	Up	0.0823082	0.0102398	2.89343e-06	0.796894	1.18341	1.27439	1550	110094155	LOC110094155	uncharacterized LOC110094155, transcript variant X2	GO:0005576,GO:0004339,GO:2001070,GO:0000272	extracellular region|glucan 1,4-alpha-glucosidase activity|starch binding|polysaccharide catabolic process	-	-
XM_020819323.2	501.693	291.994	711.391	2.43632	1.2847	0.0334848	0.137865	Up	6.81752	6.92676	6.72746	17.2304	18.4137	18.6595	1702	110094158	LOC110094158	nematode resistance protein-like HSPRO2	GO:0005737,GO:0020037,GO:0046872,GO:0009816,GO:0006979,GO:0009751,GO:0019441	cytoplasm|heme binding|metal ion binding|defense response to bacterium, incompatible interaction|response to oxidative stress|response to salicylic acid|tryptophan catabolic process to kynurenine	-	-
XM_020819325.2	181.674	21.4863	341.862	15.9106	3.99192	5.90452e-08	2.37061e-06	Up	2.09043e-05	0.141889	0.522287	4.8356	6.79223	0.000391908	3818	110094160	LOC110094160	protein transport protein Sec24-like At3g07100, transcript variant X1	GO:0030127,GO:0005789,GO:0000139,GO:0008270,GO:0007029,GO:0006888,GO:0080119,GO:0007030,GO:0006886,GO:0048232,GO:0032876,GO:0008361	COPII vesicle coat|endoplasmic reticulum membrane|Golgi membrane|zinc ion binding|endoplasmic reticulum organization|endoplasmic reticulum to Golgi vesicle-mediated transport|ER body organization|Golgi organization|intracellular protein transport|male gamete generation|negative regulation of DNA endoreduplication|regulation of cell size	path:dct04141	Protein processing in endoplasmic reticulum
XM_020819327.2	206.83	322.144	91.5169	0.284087	-1.8156	0.00586422	0.0380174	Down	8.71657	8.59117	8.11726	3.08187	2.33417	2.4495	1513	110094162	LOC110094162	ataxin-3 homolog	GO:0005634,GO:0004843,GO:0016579	nucleus|thiol-dependent ubiquitin-specific protease activity|protein deubiquitination	path:dct04141	Protein processing in endoplasmic reticulum
XM_020819346.2	58.0586	8.07569	108.042	13.3786	3.74186	3.69447e-05	0.000622632	Up	0.169329	0.224683	0.0709295	2.25012	2.64759	1.94738	2050	110094183	LOC110094183	probable trehalase	GO:0005886,GO:0004555,GO:0005993	plasma membrane|alpha,alpha-trehalase activity|trehalose catabolic process	path:dct00500,path:dct01100,path:dct01110	Starch and sucrose metabolism|Metabolic pathways|Biosynthesis of secondary metabolites
XM_020819351.2	25.3624	4.85126	45.8734	9.45599	3.24123	0.00555925	0.0365851	Up	0.407099	0.0828622	3.87141e-06	0.239165	4.24881	0.573395	1177	110094185	LOC110094185	39S ribosomal protein L47, mitochondrial, transcript variant X7	GO:0005762,GO:0005739,GO:0003735,GO:0032543	mitochondrial large ribosomal subunit|mitochondrion|structural constituent of ribosome|mitochondrial translation	-	-
XM_020819356.2	17.0455	1.64697	32.4441	19.6993	4.30007	0.00341165	0.0250533	Up	0.0184783	0.019891	0.10664	1.07524	1.0795	1.64813	1108	110094186	LOC110094186	heat stress transcription factor B-2b	GO:0005634,GO:0003700,GO:0000978,GO:0043565,GO:0034605,GO:0061408	nucleus|DNA-binding transcription factor activity|RNA polymerase II proximal promoter sequence-specific DNA binding|sequence-specific DNA binding|cellular response to heat|positive regulation of transcription from RNA polymerase II promoter in response to heat stress	-	-
XM_020819358.2	262.49	503.207	21.7738	0.0432701	-4.53049	3.93235e-10	2.68387e-08	Down	15.5357	14.7851	14.0027	0.148049	0.320224	1.64349	1355	110094188	LOC110094188	bifunctional UDP-glucose 4-epimerase and UDP-xylose 4-epimerase 1, transcript variant X1	GO:0005829,GO:0005886,GO:0050373,GO:0003978,GO:0045227,GO:0071555,GO:0019388,GO:0033499,GO:0033358	cytosol|plasma membrane|UDP-arabinose 4-epimerase activity|UDP-glucose 4-epimerase activity|capsule polysaccharide biosynthetic process|cell wall organization|galactose catabolic process|galactose catabolic process via UDP-galactose|UDP-L-arabinose biosynthetic process	path:dct00052,path:dct00520,path:dct01100	Galactose metabolism|Amino sugar and nucleotide sugar metabolism|Metabolic pathways
XM_020819359.2	14.0301	27.1171	0.94303	0.0347763	-4.84575	0.00351148	0.0256182	Down	0.594388	2.03431e-07	1.83591	0.0925623	1.70736e-05	1.27564e-19	1320	110094188	LOC110094188	bifunctional UDP-glucose 4-epimerase and UDP-xylose 4-epimerase 1, transcript variant X2	GO:0005829,GO:0005886,GO:0050373,GO:0003978,GO:0045227,GO:0071555,GO:0019388,GO:0033499,GO:0033358	cytosol|plasma membrane|UDP-arabinose 4-epimerase activity|UDP-glucose 4-epimerase activity|capsule polysaccharide biosynthetic process|cell wall organization|galactose catabolic process|galactose catabolic process via UDP-galactose|UDP-L-arabinose biosynthetic process	path:dct00052,path:dct00520,path:dct01100	Galactose metabolism|Amino sugar and nucleotide sugar metabolism|Metabolic pathways
XM_020819362.2	341.63	609.599	73.6623	0.120837	-3.04886	3.73969e-06	8.90412e-05	Down	26.5325	24.6676	24.8628	3.38909	3.0959	3.50544	957	110094190	LOC110094190	uncharacterized LOC110094190	-	-	-	-
XM_020819363.2	933.369	1612.69	254.045	0.157528	-2.66632	1.5886e-05	0.000309982	Down	43.5559	46.9848	45.945	8.75283	7.42431	7.23108	1411	110094192	LOC110094192	12-oxophytodienoate reductase 7	GO:0005777,GO:0016629,GO:0010181,GO:0016491,GO:0009695,GO:0031408,GO:0009620,GO:0010193,GO:0048443	peroxisome|12-oxophytodienoate reductase activity|FMN binding|oxidoreductase activity|jasmonic acid biosynthetic process|oxylipin biosynthetic process|response to fungus|response to ozone|stamen development	path:dct00592,path:dct01100,path:dct01110	alpha-Linolenic acid metabolism|Metabolic pathways|Biosynthesis of secondary metabolites
XM_020819364.2	80.2293	157.188	3.27077	0.0208081	-5.58671	3.40563e-09	1.82483e-07	Down	3.27803	3.43733	3.33609	0.0512642	0.0531255	0.127916	1866	110094191	LOC110094191	asparagine--tRNA ligase, cytoplasmic 2	GO:0009507,GO:0005829,GO:0005739,GO:0004816,GO:0005524,GO:0006421	chloroplast|cytosol|mitochondrion|asparagine-tRNA ligase activity|ATP binding|asparaginyl-tRNA aminoacylation	path:dct00970	Aminoacyl-tRNA biosynthesis
XM_020819375.2	803.439	1112.08	494.795	0.444926	-1.16836	0.0479582	0.178546	Down	39.6543	47.1738	49.7793	20.389	22.307	23.422	972	110094201	LOC110094201	40S ribosomal protein S3-3	GO:0005829,GO:0022626,GO:0022627,GO:0005730,GO:0005634,GO:0009506,GO:0009536,GO:0003684,GO:0003906,GO:0032357,GO:0008534,GO:0003723,GO:0003735,GO:0006281,GO:0045739,GO:0006412	cytosol|cytosolic ribosome|cytosolic small ribosomal subunit|nucleolus|nucleus|plasmodesma|plastid|damaged DNA binding|DNA-(apurinic or apyrimidinic site) endonuclease activity|oxidized purine DNA binding|oxidized purine nucleobase lesion DNA N-glycosylase activity|RNA binding|structural constituent of ribosome|DNA repair|positive regulation of DNA repair|translation	path:dct03010	Ribosome
XM_020819376.2	803.705	1124.02	483.393	0.430058	-1.2174	0.0394261	0.155128	Down	42.4559	44.0711	40.2224	19.2232	18.6744	21.4404	1059	110094198	LOC110094198	ras-related protein RABA5c	GO:0005829,GO:0000139,GO:0005795,GO:0005798,GO:0005886,GO:0005802,GO:0005525,GO:0003924,GO:0048219,GO:0006886,GO:0032482,GO:0009408	cytosol|Golgi membrane|Golgi stack|Golgi-associated vesicle|plasma membrane|trans-Golgi network|GTP binding|GTPase activity|inter-Golgi cisterna vesicle-mediated transport|intracellular protein transport|Rab protein signal transduction|response to heat	path:dct04144	Endocytosis
XM_020819379.2	229.253	355.294	103.212	0.290497	-1.7834	0.00586466	0.0380174	Down	8.89575	5.89526	10.2493	3.18797	2.74482	1.9773	1694	110094204	LOC110094204	cytokinin dehydrogenase 11, transcript variant X1	GO:0005615,GO:0019139,GO:0071949,GO:0009690	extracellular space|cytokinin dehydrogenase activity|FAD binding|cytokinin metabolic process	path:dct00908	Zeatin biosynthesis
XM_020819380.2	754.94	427.832	1082.05	2.52914	1.33865	0.0239448	0.108366	Up	7.86463	8.15596	7.52388	21.2202	23.908	19.6545	2170	110094178	LOC110094178	putative disease resistance protein RGA3	GO:0043531,GO:0005524,GO:0006952	ADP binding|ATP binding|defense response	-	-
XM_020819382.2	159.749	71.1744	248.324	3.48896	1.8028	0.00786624	0.0475479	Up	0.877796	0.960275	0.891551	3.50148	3.44717	3.43787	3108	110094205	LOC110094205	uncharacterized LOC110094205	GO:0044732,GO:0000109,GO:0005634,GO:0006289	mitotic spindle pole body|nucleotide-excision repair complex|nucleus|nucleotide-excision repair	-	-
XM_020819383.2	4.86757	0	9.73514	Inf	Inf	0.0494667	0.182473	Up	4.46134e-34	6.7863e-31	9.56828e-29	0.381189	0.384434	0.607813	920	110094206	LOC110094206	auxin-binding protein ABP20-like	GO:0048046,GO:0005618,GO:0030145,GO:0045735,GO:0009734	apoplast|cell wall|manganese ion binding|nutrient reservoir activity|auxin-activated signaling pathway	-	-
XM_020819384.2	7.42935	14.8587	0	0	#NAME?	0.00940596	0.054477	Down	1.14172	0.800728	0.872887	0.00385641	0.0101318	0.00145363	636	110094207	LOC110094207	auxin-binding protein ABP19a-like	GO:0048046,GO:0005618,GO:0030145,GO:0045735,GO:0009734	apoplast|cell wall|manganese ion binding|nutrient reservoir activity|auxin-activated signaling pathway	-	-
XM_020819386.2	304.366	19.0013	589.732	31.0365	4.95589	1.54191e-11	1.46273e-09	Up	0.438789	0.51551	0.423134	15.0388	15.4424	15.0259	1684	110094210	LOC110094210	AP2-like ethylene-responsive transcription factor AIL1	GO:0005634,GO:0003677,GO:0003700,GO:0043565,GO:0030154,GO:0009908,GO:0019760,GO:0010492,GO:0042127	nucleus|DNA binding|DNA-binding transcription factor activity|sequence-specific DNA binding|cell differentiation|flower development|glucosinolate metabolic process|maintenance of shoot apical meristem identity|regulation of cell population proliferation	-	-
XM_020819398.2	460.394	143.701	777.086	5.40764	2.435	0.000111514	0.00158086	Up	4.67066	4.69396	4.98096	28.5136	28.4584	27.3801	1197	110094219	LOC110094219	protein EXORDIUM-like	GO:0048046,GO:0005615	apoplast|extracellular space	-	-
XM_020819416.2	390.544	570.604	210.484	0.368878	-1.43878	0.0195552	0.0935939	Down	8.19125	9.29722	8.41023	3.01822	3.91644	3.46288	2632	110094234	LOC110094234	probable pectin methyltransferase QUA2	GO:0005768,GO:0005794,GO:0000139,GO:0016021,GO:0005802,GO:0008168,GO:0007155,GO:0010289,GO:0009735,GO:0048364,GO:0048367	endosome|Golgi apparatus|Golgi membrane|integral component of membrane|trans-Golgi network|methyltransferase activity|cell adhesion|homogalacturonan biosynthetic process|response to cytokinin|root development|shoot system development	-	-
XM_020819421.2	796.149	399.579	1192.72	2.98494	1.5777	0.00804172	0.048301	Up	10.0398	11.279	10.7655	34.6553	37.5639	31.9856	1487	110094237	LOC110094237	probable RNA-binding protein ARP1	GO:0005634,GO:1990904,GO:0003729,GO:0003723,GO:0006397,GO:0010029,GO:0009737,GO:0009651,GO:0009414	nucleus|ribonucleoprotein complex|mRNA binding|RNA binding|mRNA processing|regulation of seed germination|response to abscisic acid|response to salt stress|response to water deprivation	-	-
XM_020819423.2	885.767	365.817	1405.72	3.84268	1.94211	0.00122831	0.0112116	Up	11.4725	12.5187	11.9649	49.4479	50.9784	50.0317	1214	110094239	LOC110094239	protein EXORDIUM-like	GO:0048046,GO:0005615	apoplast|extracellular space	-	-
XM_020819425.2	57.4632	113.983	0.94303	0.0082734	-6.9173	1.97562e-09	1.12238e-07	Down	9.12972	6.59222	6.79372	0.185581	0	0	604	110094241	LOC110094241	proteinase inhibitor PSI-1.2	-	-	-	-
XM_020819426.2	18.5995	1.00424	36.1948	36.0421	5.17161	0.000609178	0.00635225	Up	0	0.0625355	0.112775	2.82241	2.20572	2.90474	594	110094243	LOC110094243	uncharacterized LOC110094243	-	-	-	-
XM_020819445.2	560.017	804.77	315.264	0.391744	-1.35202	0.0242424	0.109364	Down	14.6901	14.115	15.5828	5.75797	6.6189	6.54908	2165	110094251	LOC110094251	probable inositol transporter 2	GO:0005887,GO:0005886,GO:0090406,GO:0005366,GO:0015798,GO:0023052	integral component of plasma membrane|plasma membrane|pollen tube|myo-inositol:proton symporter activity|myo-inositol transport|signaling	-	-
XM_020819453.2	359.627	647.251	72.0031	0.111244	-3.1682	1.54354e-06	4.18366e-05	Down	7.2311	6.18481	9.56045	1.21759	0.425665	1.13854	3364	110094258	LOC110094258	FT-interacting protein 3, transcript variant X4	GO:0005618,GO:0005737,GO:0005829,GO:0005783,GO:0005789,GO:0005768,GO:0010008,GO:0000139,GO:0016021,GO:0005886,GO:0009506,GO:0016757,GO:1902182	cell wall|cytoplasm|cytosol|endoplasmic reticulum|endoplasmic reticulum membrane|endosome|endosome membrane|Golgi membrane|integral component of membrane|plasma membrane|plasmodesma|transferase activity, transferring glycosyl groups|shoot apical meristem development	-	-
XM_020819461.2	178.659	91.5885	265.73	2.90135	1.53673	0.0210681	0.0986438	Up	1.94134	1.52979	1.73371	5.59764	5.45428	5.42324	2096	110094267	LOC110094267	protein trichome berefringence-like 7	GO:0005794,GO:0016021,GO:0016413	Golgi apparatus|integral component of membrane|O-acetyltransferase activity	-	-
XM_020819464.2	445.12	688.709	201.532	0.292624	-1.77288	0.00401954	0.0283312	Down	9.14075	9.17118	9.09551	2.9867	2.77504	2.96773	3001	110094271	LOC110094271	pentatricopeptide repeat-containing protein At1g74850, chloroplastic, transcript variant X1	-	-	-	-
XM_020819466.2	20.2182	0.998413	39.4381	39.5007	5.30381	0.000317824	0.00373939	Up	0.0150132	0.0163964	0.0151661	0.406144	0.511698	0.455322	3750	110094273	LOC110094273	putative multidrug resistance protein	GO:0016021,GO:0005524,GO:0016887,GO:0042626,GO:0055085	integral component of membrane|ATP binding|ATPase activity|ATPase-coupled transmembrane transporter activity|transmembrane transport	path:dct02010	ABC transporters
XM_020819479.2	421.292	637.566	205.018	0.321564	-1.63682	0.00779379	0.0472309	Down	32.1016	31.5683	30.1703	9.65905	12.0107	11.1932	811	110094285	LOC110094285	uncharacterized LOC110094285	-	-	-	-
XM_020819507.2	1288.55	735.283	1841.82	2.50491	1.32476	0.0232035	0.105897	Up	10.3263	11.6315	11.7207	31.8745	30.008	29.9411	2606	110094305	LOC110094305	flowering time control protein FY, transcript variant X1	GO:0005847,GO:0030154,GO:0009908,GO:0006378	mRNA cleavage and polyadenylation specificity factor complex|cell differentiation|flower development|mRNA polyadenylation	path:dct03015	mRNA surveillance pathway
XM_020819508.2	1024.81	628.603	1421.01	2.26059	1.1767	0.0455693	0.172288	Up	11.0052	9.10887	8.80695	22.5961	23.7803	24.7228	2597	110094305	LOC110094305	flowering time control protein FY, transcript variant X2	GO:0005847,GO:0030154,GO:0009908,GO:0006378	mRNA cleavage and polyadenylation specificity factor complex|cell differentiation|flower development|mRNA polyadenylation	path:dct03015	mRNA surveillance pathway
XM_020819509.2	38.5448	12.1012	64.9884	5.37039	2.42503	0.0130676	0.0692811	Up	2.28214	1.01973e-05	0.000112386	1.79021	10.8428	0.758904	631	110094306	LOC110094306	26S proteasome non-ATPase regulatory subunit 2 homolog A, transcript variant X2	GO:0005737,GO:0005829,GO:0005739,GO:0005634,GO:0005886,GO:0009506,GO:0000502,GO:0008540,GO:0034515,GO:0030234,GO:0043130,GO:0045087,GO:0043161,GO:0030163,GO:0051726,GO:0042176,GO:0009751	cytoplasm|cytosol|mitochondrion|nucleus|plasma membrane|plasmodesma|proteasome complex|proteasome regulatory particle, base subcomplex|proteasome storage granule|enzyme regulator activity|ubiquitin binding|innate immune response|proteasome-mediated ubiquitin-dependent protein catabolic process|protein catabolic process|regulation of cell cycle|regulation of protein catabolic process|response to s…	-	-
XM_020819512.2	745.825	1161.65	329.999	0.284077	-1.81565	0.0025745	0.0200581	Down	45.0853	48.4774	50.0289	13.8289	15.4991	15.0589	966	110094309	LOC110094309	ganglioside-induced differentiation-associated protein 2	-	-	-	-
XM_020819518.2	39.5298	70.5684	8.49128	0.120327	-3.05497	0.00167318	0.0143353	Down	2.26701	1.67444	2.42245	0.173842	0.166764	0.498112	1323	110094312	LOC110094312	uridine 5'-monophosphate synthase, transcript variant X3	GO:0005829,GO:0004588,GO:0004590,GO:0006207,GO:0044205,GO:0016036,GO:0009116,GO:0019856,GO:0046686,GO:0006222	cytosol|orotate phosphoribosyltransferase activity|orotidine-5'-phosphate decarboxylase activity|'de novo' pyrimidine nucleobase biosynthetic process|'de novo' UMP biosynthetic process|cellular response to phosphate starvation|nucleoside metabolic process|pyrimidine nucleobase biosynthetic process|response to cadmium ion|UMP biosynthetic process	path:dct00240,path:dct01100	Pyrimidine metabolism|Metabolic pathways
XM_020819519.2	115.548	209.416	21.6786	0.103519	-3.27203	1.66751e-05	0.000322461	Down	7.03149	6.99723	7.26512	0.817921	0.602986	0.957267	1174	110094313	LOC110094313	uncharacterized protein At3g28850-like	GO:0005623,GO:0005886,GO:0009055,GO:0015035,GO:0045454	cell|plasma membrane|electron transfer activity|protein disulfide oxidoreductase activity|cell redox homeostasis	-	-
XM_020819520.2	197.271	67.7536	326.788	4.82318	2.26998	0.000731588	0.00738615	Up	1.36397	1.23971	0.979614	7.10949	5.36325	6.22405	2270	110094314	LOC110094314	UDP-N-acetylmuramate--L-alanine ligase	-	-	-	-
XM_020819521.2	89.7244	28.5723	150.877	5.28051	2.40068	0.0018752	0.0157093	Up	1.47238	0.71873	0.703018	4.9556	5.27758	6.34059	1182	110094315	LOC110094315	common plant regulatory factor 1-like	GO:0005634,GO:0003677,GO:0003700	nucleus|DNA binding|DNA-binding transcription factor activity	-	-
XM_020819522.2	995.974	560.135	1431.81	2.55619	1.354	0.0214893	0.100072	Up	8.5891	9.04394	9.19817	24.1872	25.4959	24.9729	2492	110094316	LOC110094316	nuclear pore complex protein NUP85	GO:0005635,GO:0031080,GO:0017056,GO:0006406,GO:0045893,GO:0006606,GO:0009737	nuclear envelope|nuclear pore outer ring|structural constituent of nuclear pore|mRNA export from nucleus|positive regulation of transcription, DNA-templated|protein import into nucleus|response to abscisic acid	path:dct03013	RNA transport
XM_020819523.2	342.969	484.087	201.852	0.416974	-1.26197	0.0416699	0.161291	Down	15.1543	15.9264	13.5509	6.87128	6.52631	6.82377	1295	110094318	LOC110094318	chaperone protein dnaJ C76, chloroplastic	GO:0009507	chloroplast	-	-
XM_020819526.2	29.6359	51.145	8.12677	0.158897	-2.65384	0.0127122	0.0678619	Down	1.04496	1.39983	0.0092548	0.159689	0.0248706	0.245846	2488	110094320	LOC110094320	golgin-84, transcript variant X2	GO:0031985,GO:0000139,GO:0016021,GO:0007030,GO:0000301	Golgi cisterna|Golgi membrane|integral component of membrane|Golgi organization|retrograde transport, vesicle recycling within Golgi	-	-
XM_020819528.2	285.804	405.865	165.743	0.408368	-1.29206	0.0393446	0.154828	Down	18.1628	18.0421	18.958	8.22575	7.7582	8.46849	879	110094321	LOC110094321	protein NDR1	GO:0046658,GO:0016020,GO:0005886,GO:0009506,GO:0042742,GO:0009816,GO:0009817,GO:0009814,GO:0009626,GO:0010942	anchored component of plasma membrane|membrane|plasma membrane|plasmodesma|defense response to bacterium|defense response to bacterium, incompatible interaction|defense response to fungus, incompatible interaction|defense response, incompatible interaction|plant-type hypersensitive response|positive regulation of cell death	-	-
XM_020819529.2	344.95	611.204	78.6965	0.128757	-2.95728	6.79441e-06	0.000147564	Down	11.8681	12.1359	10.4171	1.36735	2.24629	1.20152	2120	110094322	LOC110094322	ankyrin-1-like	GO:0005783,GO:0016021,GO:0005886	endoplasmic reticulum|integral component of membrane|plasma membrane	-	-
XM_020819532.2	128.216	57.4497	198.982	3.46358	1.79227	0.0106343	0.0595183	Up	2.13223	1.69809	0.908146	6.91651	4.19587	6.79879	1444	110094323	LOC110094323	AP-4 complex subunit mu, transcript variant X3	GO:0030124,GO:0030131,GO:0005905,GO:0005829,GO:0005802,GO:0006886,GO:0016192	AP-4 adaptor complex|clathrin adaptor complex|clathrin-coated pit|cytosol|trans-Golgi network|intracellular protein transport|vesicle-mediated transport	-	-
XM_020819541.2	17.408	0.318454	34.4975	108.328	6.75926	0.000184256	0.00239073	Up	0.0125235	0.00714284	0.00464136	0.382948	0.429341	0.793067	2790	110094333	LOC110094333	uncharacterized LOC110094333, transcript variant X1	-	-	-	-
XM_020819548.2	32.2959	52.3369	12.255	0.234156	-2.09446	0.0361526	0.145925	Down	1.35447	1.17227	1.24119	0.361687	0.265972	0.306835	1661	110094335	LOC110094335	protein SULFUR DEFICIENCY-INDUCED 1	GO:0090568,GO:0010438,GO:0010439,GO:0006792	nuclear transcriptional repressor complex|cellular response to sulfur starvation|regulation of glucosinolate biosynthetic process|regulation of sulfur utilization	-	-
XM_020819554.2	374.178	699.814	48.5423	0.0693646	-3.84966	1.6538e-08	7.53627e-07	Down	4.50529	4.66077	4.7551	0.391617	0.426655	0.232337	6002	110094338	LOC110094338	myosin-12	GO:0016461,GO:0003779,GO:0005524,GO:0005516,GO:0003774,GO:0007015,GO:0030048	unconventional myosin complex|actin binding|ATP binding|calmodulin binding|motor activity|actin filament organization|actin filament-based movement	-	-
XM_020819566.2	201.474	313.144	89.8032	0.286779	-1.80199	0.00627805	0.0399932	Down	7.98643	7.42035	6.30692	2.32527	2.12383	2.34753	1721	110094348	LOC110094348	probable serine/threonine-protein kinase PBL16, transcript variant X1	-	-	-	-
XM_020819569.2	1893.02	901.238	2884.8	3.20093	1.67849	0.00423913	0.0295817	Up	30.1381	28.2855	28.5723	98.4703	105.559	98.9905	1237	110094350	LOC110094350	GATA transcription factor 18, transcript variant X2	GO:0005634,GO:0043565,GO:0008270,GO:0006355	nucleus|sequence-specific DNA binding|zinc ion binding|regulation of transcription, DNA-templated	-	-
XM_020819571.2	763.043	1140.18	385.905	0.33846	-1.56294	0.00893286	0.0522446	Down	28.3029	29.3549	28.1625	10.1678	11.3159	10.1247	1587	110094352	LOC110094352	lecithin-cholesterol acyltransferase-like 1	GO:0016021,GO:0005774,GO:0005773,GO:0008374,GO:0006629	integral component of membrane|vacuolar membrane|vacuole|O-acyltransferase activity|lipid metabolic process	-	-
XM_020819585.1	1376.34	704.427	2048.25	2.90768	1.53987	0.00870806	0.0513677	Up	18.8636	19.6127	18.0764	58.2135	59.6486	61.012	1488	110094365	LOC110094365	probable aldo-keto reductase 2	GO:0016491	oxidoreductase activity	-	-
XM_020819602.2	11.4964	0	22.9928	Inf	Inf	0.00094013	0.00902926	Up	6.21973e-05	0.000790843	0.00010551	1.1731	0.120213	1.29499	1160	110094379	LOC110094379	cysteine synthase, transcript variant X4	GO:0005737,GO:0004124,GO:0030170,GO:0006535	cytoplasm|cysteine synthase activity|pyridoxal phosphate binding|cysteine biosynthetic process from serine	path:dct00270,path:dct00920,path:dct01100,path:dct01110,path:dct01200,path:dct01230	Cysteine and methionine metabolism|Sulfur metabolism|Metabolic pathways|Biosynthesis of secondary metabolites|Carbon metabolism|Biosynthesis of amino acids
XM_020819619.2	335.23	625.07	45.3892	0.0726146	-3.7836	3.38337e-08	1.4457e-06	Down	23.9209	25.0904	23.0269	2.21129	1.9551	1.53766	1036	110094391	LOC110094391	uncharacterized LOC110094391	-	-	-	-
XM_020819622.2	296.942	483.316	110.569	0.228771	-2.12802	0.000907053	0.0087674	Down	7.97082	7.85752	7.90705	1.72718	2.21689	1.96969	2430	110094393	LOC110094393	protein trichome birefringence	GO:0005768,GO:0005794,GO:0016021,GO:0005802,GO:0016413,GO:0030244,GO:0045489,GO:0009827	endosome|Golgi apparatus|integral component of membrane|trans-Golgi network|O-acetyltransferase activity|cellulose biosynthetic process|pectin biosynthetic process|plant-type cell wall modification	-	-
XM_020819628.2	457.744	668.829	246.658	0.368791	-1.43913	0.0183014	0.0890049	Down	23.8868	24.8694	24.5624	9.52903	10.6322	9.26226	1089	110094400	LOC110094400	uncharacterized LOC110094400, transcript variant X1	-	-	-	-
XM_020819630.2	440.746	130.689	750.802	5.74494	2.52229	7.01417e-05	0.00106921	Up	2.83563	2.6151	2.56222	16.543	16.6748	17.0237	1941	110094403	LOC110094403	serine/threonine-protein kinase SAPK7	GO:0005737,GO:0005634,GO:0005524,GO:0004674,GO:0009738,GO:0042742,GO:0035556,GO:0006468	cytoplasm|nucleus|ATP binding|protein serine/threonine kinase activity|abscisic acid-activated signaling pathway|defense response to bacterium|intracellular signal transduction|protein phosphorylation	path:dct04016,path:dct04075	MAPK signaling pathway - plant|Plant hormone signal transduction
XM_020819634.2	854.996	303.084	1406.91	4.64198	2.21474	0.000268342	0.00326414	Up	5.20785	5.19125	4.59607	24.6085	25.7639	25.3417	2415	110094404	LOC110094404	acyl-coenzyme A oxidase 3, peroxisomal	GO:0005576,GO:0005777,GO:0003997,GO:0071949,GO:0005504,GO:0050660,GO:0006635,GO:0033540,GO:0055088,GO:0051791	extracellular region|peroxisome|acyl-CoA oxidase activity|FAD binding|fatty acid binding|flavin adenine dinucleotide binding|fatty acid beta-oxidation|fatty acid beta-oxidation using acyl-CoA oxidase|lipid homeostasis|medium-chain fatty acid metabolic process	path:dct00071,path:dct00410,path:dct00592,path:dct00640,path:dct01040,path:dct01100,path:dct01110,path:dct01200,path:dct01212,path:dct04146	Fatty acid degradation|beta-Alanine metabolism|alpha-Linolenic acid metabolism|Propanoate metabolism|Biosynthesis of unsaturated fatty acids|Metabolic pathways|Biosynthesis of secondary metabolites|Carbon metabolism|Fatty acid metabolism|Peroxisome
XM_020819636.2	620.844	296.659	945.029	3.18558	1.67155	0.00582198	0.0378354	Up	10.7716	9.26535	10.1375	33.2964	34.3036	36.9876	1174	110094406	LOC110094406	protein DEHYDRATION-INDUCED 19, transcript variant X1	-	-	-	-
XM_020819637.2	2526.97	794.347	4259.58	5.36237	2.42287	5.22023e-05	0.000829749	Up	26.9824	28.3478	25.9527	157.239	162.259	154.738	1167	110094406	LOC110094406	protein DEHYDRATION-INDUCED 19, transcript variant X2	-	-	-	-
XM_020819644.2	1315.28	331.426	2299.13	6.93706	2.79432	5.66635e-06	0.000126433	Up	8.30598	7.23901	8.1106	60.3066	59.1814	59.0598	1673	110094409	LOC110094409	E3 ubiquitin-protein ligase makorin	GO:0003677,GO:0046872,GO:0016740,GO:0016567	DNA binding|metal ion binding|transferase activity|protein ubiquitination	-	-
XM_020819653.2	207.098	378.677	35.5177	0.0937941	-3.41436	1.20913e-06	3.36492e-05	Down	9.53577	8.74499	9.94335	0.936492	1.00792	0.926408	1601	110094418	LOC110094418	aspartic proteinase nepenthesin-2	GO:0005576,GO:0004190	extracellular region|aspartic-type endopeptidase activity	-	-
XM_020819664.2	25.9556	44.9162	6.99501	0.155735	-2.68284	0.0150753	0.0766909	Down	0.644596	0.0383382	1.69207	0.294738	0.0562029	0.0531884	2255	110094432	LOC110094432	probable GMP synthase [glutamine-hydrolyzing], transcript variant X3	-	-	path:dct03410	Base excision repair
XM_020819665.2	7.48335	14.9667	0	0	#NAME?	0.00887973	0.0520379	Down	0.253853	0.0820836	0.557121	1.54152e-13	1.71599e-08	4.66364e-07	1985	110094432	LOC110094432	probable GMP synthase [glutamine-hydrolyzing], transcript variant X1	-	-	path:dct03410	Base excision repair
XM_020819667.2	968.111	306.85	1629.37	5.31	2.40871	7.88881e-05	0.0011809	Up	6.64586	6.98537	7.45386	40.9274	39.4	41.5503	1737	110094435	LOC110094435	transcription factor MYC2-like	GO:0005634,GO:0046983,GO:0043565,GO:0006952,GO:0007275,GO:0045893,GO:0040008	nucleus|protein dimerization activity|sequence-specific DNA binding|defense response|multicellular organism development|positive regulation of transcription, DNA-templated|regulation of growth	path:dct04016,path:dct04075	MAPK signaling pathway - plant|Plant hormone signal transduction
XM_020819674.2	1805.89	769.994	2841.8	3.69067	1.88388	0.0014251	0.0125815	Up	17.823	17.767	17.6088	71.399	71.0159	71.2331	1728	110094439	LOC110094439	CBL-interacting protein kinase 6-like	GO:0005524,GO:0004674,GO:0007165	ATP binding|protein serine/threonine kinase activity|signal transduction	-	-
XM_020819676.2	47.1582	14.7807	79.5357	5.38105	2.42789	0.00723586	0.044648	Up	0.422358	0.197217	0.112864	1.66997	1.43627	1.21471	2393	110094441	LOC110094441	subtilisin-like protease SBT1.5	GO:0048046,GO:0005618,GO:0005576,GO:0099503,GO:0004252,GO:0080001,GO:0048359,GO:0010214	apoplast|cell wall|extracellular region|secretory vesicle|serine-type endopeptidase activity|mucilage extrusion from seed coat|mucilage metabolic process involved in seed coat development|seed coat development	-	-
XM_020819678.2	459.785	195.785	723.784	3.69682	1.88629	0.00223063	0.0179587	Up	12.7524	13.9312	14.0968	53.995	58.2548	51.9064	573	110094444	LOC110094444	uncharacterized LOC110094444, transcript variant X1	-	-	-	-
XM_020819687.2	36.4018	14.9111	57.8925	3.88251	1.95699	0.0412821	0.160356	Up	0.539616	0.720806	1.30733	4.02492	2.49837	4.43521	687	110094447	LOC110094447	trihelix transcription factor ASR3-like	GO:0005634,GO:0003677,GO:0003700,GO:0042803,GO:0071219,GO:0006952,GO:0050777,GO:0045892,GO:0006355	nucleus|DNA binding|DNA-binding transcription factor activity|protein homodimerization activity|cellular response to molecule of bacterial origin|defense response|negative regulation of immune response|negative regulation of transcription, DNA-templated|regulation of transcription, DNA-templated	-	-
XM_020819692.2	24.7989	4.61081	44.9869	9.75685	3.28641	0.00517257	0.0346066	Up	0.101753	0.100149	0.198374	1.45765	1.23179	1.74666	1326	110094449	LOC110094449	uncharacterized LOC110094449, transcript variant X1	-	-	-	-
XM_020819695.2	103.262	38.3836	168.141	4.38054	2.13111	0.00395807	0.0280158	Up	0.500536	0.562064	0.946324	3.32042	2.5669	3.63911	2292	110094455	LOC110094455	subtilisin-like protease SBT1.5	GO:0048046,GO:0005618,GO:0005576,GO:0099503,GO:0004252,GO:0080001,GO:0048359,GO:0010214	apoplast|cell wall|extracellular region|secretory vesicle|serine-type endopeptidase activity|mucilage extrusion from seed coat|mucilage metabolic process involved in seed coat development|seed coat development	-	-
XM_020819703.2	1396.29	598.671	2193.91	3.66463	1.87367	0.00166196	0.0142716	Up	10.631	9.31153	12.1083	37.5981	42.8988	47.3676	2230	110094459	LOC110094459	zinc finger CCCH domain-containing protein 44, transcript variant X1	GO:0003677	DNA binding	-	-
XM_020819704.2	242.175	133.861	350.49	2.61832	1.38864	0.0324835	0.134624	Up	2.99154	0.971929	3.20717	8.16981	6.61493	5.64117	2227	110094459	LOC110094459	zinc finger CCCH domain-containing protein 44, transcript variant X2	GO:0003677	DNA binding	-	-
XM_020819705.2	535.928	239.326	832.53	3.47865	1.79853	0.00264083	0.0204639	Up	5.07439	9.10929	1.27682	24.9616	17.6721	15.7986	1850	110094459	LOC110094459	zinc finger CCCH domain-containing protein 44, transcript variant X3	GO:0005829,GO:0005634,GO:0003677,GO:0042393,GO:0046872,GO:0032776,GO:0031047,GO:0010964	cytosol|nucleus|DNA binding|histone binding|metal ion binding|DNA methylation on cytosine|gene silencing by RNA|regulation of chromatin silencing by small RNA	-	-
XM_020819710.2	161.303	261.741	60.865	0.232539	-2.10445	0.00193205	0.0160784	Down	4.58171	3.53699	2.64006	0.0959711	1.25249	1.37499	2908	110094462	LOC110094462	WEB family protein At3g02930, chloroplastic, transcript variant X1	GO:0009507,GO:0005875,GO:0007131	chloroplast|microtubule associated complex|reciprocal meiotic recombination	-	-
XM_020819711.2	1904.58	3207.49	601.668	0.187582	-2.41441	6.00528e-05	0.000936718	Down	42.1196	44.07	45.6669	10.1556	7.77457	8.95553	2905	110094462	LOC110094462	WEB family protein At3g02930, chloroplastic, transcript variant X2	GO:0009507,GO:0005875,GO:0007131	chloroplast|microtubule associated complex|reciprocal meiotic recombination	-	-
XM_020819712.2	455.99	901.67	10.3103	0.0114347	-6.45044	7.72131e-17	2.30623e-14	Down	28.3805	26.8141	25.7754	0.326004	0.408772	0.25791	1330	110094461	LOC110094461	probable WRKY transcription factor 53	GO:0005634,GO:0003700,GO:0043565,GO:0044212	nucleus|DNA-binding transcription factor activity|sequence-specific DNA binding|transcription regulatory region DNA binding	-	-
XM_020819713.2	185.613	263.447	107.779	0.409112	-1.28943	0.0487128	0.180432	Down	17.9941	16.6346	15.6465	5.81159	8.95102	7.6079	626	110094463	LOC110094463	mitochondrial import inner membrane translocase subunit Tim13	GO:0042719,GO:0046872,GO:0072321,GO:0045039	mitochondrial intermembrane space protein transporter complex|metal ion binding|chaperone-mediated protein transport|protein insertion into mitochondrial inner membrane	-	-
XM_020819724.2	66.7752	25.7377	107.813	4.18891	2.06658	0.0108059	0.0602445	Up	0.556845	0.348893	0.30472	1.8091	2.02146	1.71854	2523	110094471	LOC110094471	subtilisin-like protease SBT1.5	GO:0048046,GO:0005618,GO:0005576,GO:0099503,GO:0004252,GO:0080001,GO:0048359,GO:0010214	apoplast|cell wall|extracellular region|secretory vesicle|serine-type endopeptidase activity|mucilage extrusion from seed coat|mucilage metabolic process involved in seed coat development|seed coat development	-	-
XM_020819725.2	4751.77	7666.73	1836.81	0.239581	-2.06141	0.000457172	0.0049958	Down	177.491	182.232	190.165	47.2665	49.3183	46.7213	1665	110094468	LOC110094468	rhodanese-like domain-containing protein 4, chloroplastic, transcript variant X1	GO:0009507,GO:0009941,GO:0009534,GO:0009535,GO:0098807,GO:0005829,GO:0016021,GO:0042742,GO:0009772	chloroplast|chloroplast envelope|chloroplast thylakoid|chloroplast thylakoid membrane|chloroplast thylakoid membrane protein complex|cytosol|integral component of membrane|defense response to bacterium|photosynthetic electron transport in photosystem II	-	-
XM_020819729.2	106.699	156.169	57.2283	0.36645	-1.44831	0.046277	0.174069	Down	7.62534	12.8089	14.7153	7.80912	3.44454	2.66637	531	110094477	LOC110094477	probable E3 ubiquitin-protein ligase XBOS34	GO:0046872,GO:0016740,GO:0016567	metal ion binding|transferase activity|protein ubiquitination	-	-
XM_020819731.2	1527.65	2339.29	716.017	0.306083	-1.708	0.00373923	0.0268383	Down	61.0725	57.136	50.7254	19.5363	18.1575	18.556	1654	110094468	LOC110094468	rhodanese-like domain-containing protein 4, chloroplastic, transcript variant X2	GO:0009507,GO:0009941,GO:0009534,GO:0009535,GO:0098807,GO:0005829,GO:0016021,GO:0042742,GO:0009772	chloroplast|chloroplast envelope|chloroplast thylakoid|chloroplast thylakoid membrane|chloroplast thylakoid membrane protein complex|cytosol|integral component of membrane|defense response to bacterium|photosynthetic electron transport in photosystem II	-	-
XM_020819734.2	498.259	212.356	784.162	3.69268	1.88467	0.0022164	0.0178952	Up	11.8713	10.8585	12.2807	46.9223	45.1936	48.5802	724	110094482	LOC110094482	FCS-Like Zinc finger 13-like	GO:0005737,GO:0005634,GO:0046872,GO:0009749,GO:1905582,GO:0042594,GO:0009744	cytoplasm|nucleus|metal ion binding|response to glucose|response to mannose|response to starvation|response to sucrose	-	-
XM_020819738.2	39.7102	76.179	3.24148	0.0425509	-4.55467	2.17154e-05	0.000402884	Down	1.93965	1.73511	1.96854	0.0637767	0.080418	0.120814	1614	110094486	LOC110094486	purine permease 3-like	GO:0016021,GO:0016020,GO:0005345,GO:0015211,GO:0006863	integral component of membrane|membrane|purine nucleobase transmembrane transporter activity|purine nucleoside transmembrane transporter activity|purine nucleobase transport	-	-
XM_020819741.2	26.8374	0	53.6749	Inf	Inf	5.70045e-07	1.73702e-05	Up	0	0	0	0.643767	0.683141	0.370971	4091	110094489	LOC110094489	uncharacterized LOC110094489, transcript variant X1	GO:0004190,GO:0004519,GO:0046872,GO:0003676,GO:0003964,GO:0015074,GO:0006310	aspartic-type endopeptidase activity|endonuclease activity|metal ion binding|nucleic acid binding|RNA-directed DNA polymerase activity|DNA integration|DNA recombination	-	-
XM_020819750.2	662.146	1073.51	250.782	0.233609	-2.09783	0.000587372	0.00615679	Down	26.1094	24.4337	24.1908	6.06462	6.46547	6.47381	1715	110094498	LOC110094498	hydroquinone glucosyltransferase-like	GO:0050505	hydroquinone glucosyltransferase activity	-	-
XM_020819758.2	77.0422	154.084	0	0	#NAME?	1.57583e-13	2.47595e-11	Down	6.84184	7.238	6.0437	0	0	0	915	110094511	LOC110094511	uncharacterized LOC110094511	GO:0046872,GO:0008237	metal ion binding|metallopeptidase activity	-	-
XM_020819766.2	340.67	182.072	499.268	2.74214	1.4553	0.0193537	0.0928057	Up	4.57599	4.41057	4.7705	14.0548	13.1749	13.841	1580	110094519	LOC110094519	zinc finger HIT domain-containing protein 2	-	-	-	-
XM_020819775.2	3956.33	2319.51	5593.15	2.41135	1.26984	0.0274164	0.119553	Up	63.0024	64.3448	65.82	162.911	170.894	172.986	1434	110094527	LOC110094527	cell wall integrity protein scw1, transcript variant X1	GO:0005737,GO:0003729,GO:0003723,GO:0032995	cytoplasm|mRNA binding|RNA binding|regulation of fungal-type cell wall biogenesis	-	-
XM_020819776.2	791.429	307.707	1275.15	4.14404	2.05104	0.000656834	0.00676039	Up	2.06969	3.86344	2.82654	12.0472	13.2575	14.2018	4194	110094528	LOC110094528	lysine-specific demethylase JMJ25, transcript variant X1	GO:0000785,GO:0005634,GO:0031490,GO:0051213,GO:0032454,GO:0046872,GO:0000976,GO:0033169,GO:0060969	chromatin|nucleus|chromatin DNA binding|dioxygenase activity|histone demethylase activity (H3-K9 specific)|metal ion binding|transcription regulatory region sequence-specific DNA binding|histone H3-K9 demethylation|negative regulation of gene silencing	-	-
XM_020819789.2	214.253	320.068	108.437	0.338793	-1.56152	0.016881	0.0835792	Down	7.60387	9.45456	7.45597	3.14025	3.01541	2.90356	1559	110094533	LOC110094533	uncharacterized protein At4g37920, transcript variant X2	GO:0009941,GO:0009535	chloroplast envelope|chloroplast thylakoid membrane	-	-
XM_020819791.2	102.403	6.69602	198.109	29.5861	4.88685	1.30379e-08	6.08844e-07	Up	0.0761286	0.10416	0.0599664	0.301792	1.39497	6.05786	3323	110094535	LOC110094535	bifunctional dethiobiotin synthetase/7,8-diamino-pelargonic acid aminotransferase, mitochondrial, transcript variant X1	GO:0005759,GO:0005739,GO:0004015,GO:0005524,GO:0004141,GO:0000287,GO:0042803,GO:0030170,GO:0009102	mitochondrial matrix|mitochondrion|adenosylmethionine-8-amino-7-oxononanoate transaminase activity|ATP binding|dethiobiotin synthase activity|magnesium ion binding|protein homodimerization activity|pyridoxal phosphate binding|biotin biosynthetic process	path:dct00780,path:dct01100	Biotin metabolism|Metabolic pathways
XM_020819800.1	6.18635	0	12.3727	Inf	Inf	0.0208731	0.0979741	Up	1.53651e-05	0	0	2.79596	1.29852	0.05791	384	110094542	LOC110094542	RING-H2 finger protein ATL74-like	GO:0016021,GO:0046872,GO:0016740,GO:0016567	integral component of membrane|metal ion binding|transferase activity|protein ubiquitination	-	-
XM_020819804.1	6.20776	12.4155	0	0	#NAME?	0.0198126	0.0943858	Down	0.39947	0.204814	0.781141	1.02716e-38	3.77113e-39	5.28128e-39	1071	110094547	LOC110094547	carbon catabolite repressor protein 4 homolog 2-like	GO:0030014,GO:0005737,GO:0005634,GO:0000175,GO:0046872,GO:0004535,GO:0003723,GO:0000289	CCR4-NOT complex|cytoplasm|nucleus|3'-5'-exoribonuclease activity|metal ion binding|poly(A)-specific ribonuclease activity|RNA binding|nuclear-transcribed mRNA poly(A) tail shortening	path:dct03018	RNA degradation
XM_020819805.2	1285.67	382.585	2188.75	5.72095	2.51625	3.50868e-05	0.000596317	Up	14.325	14.6035	14.7364	92.2669	90.3707	89.2286	1046	110094544	LOC110094544	stem-specific protein TSJT1	-	-	-	-
XM_020819811.2	59.4585	98.5318	20.3852	0.20689	-2.27307	0.0066654	0.0418297	Down	0.708362	4.0036	4.03943	0.00168218	0.751088	1.23452	1345	110094472	LOC110094472	serine/arginine-rich splicing factor SR34B, transcript variant X2	GO:0035061,GO:0016607,GO:0005634,GO:0005681,GO:0003729,GO:0003723,GO:0045292,GO:0000381	interchromatin granule|nuclear speck|nucleus|spliceosomal complex|mRNA binding|RNA binding|mRNA cis splicing, via spliceosome|regulation of alternative mRNA splicing, via spliceosome	path:dct03040	Spliceosome
XM_020819812.2	60.9886	114.251	7.72577	0.0676208	-3.88639	1.56062e-05	0.000305115	Down	9.05346	2.06224	7.27644	0.0817555	1.32196	6.55259e-09	742	110094550	LOC110094550	protein C2-DOMAIN ABA-RELATED 11, transcript variant X2	GO:0005634,GO:0005886,GO:0009536,GO:0005773,GO:0005096,GO:0046872,GO:0005543,GO:0009738,GO:0009789,GO:0043547	nucleus|plasma membrane|plastid|vacuole|GTPase activator activity|metal ion binding|phospholipid binding|abscisic acid-activated signaling pathway|positive regulation of abscisic acid-activated signaling pathway|positive regulation of GTPase activity	-	-
XM_020819816.2	325.24	103.596	546.883	5.27897	2.40026	0.000194852	0.00250986	Up	3.07018	2.87321	2.50176	15.6373	16.7652	16.0014	1468	110094551	LOC110094551	CBS domain-containing protein CBSX5-like	-	-	-	-
XM_020819819.2	546.36	269.35	823.369	3.05687	1.61205	0.00841229	0.0500441	Up	3.67958	2.28707	2.93203	9.36763	9.53883	10.6781	3615	110094553	LOC110094553	pentatricopeptide repeat-containing protein At5g55840, transcript variant X5	-	-	-	-
XM_020819833.2	2140.69	1181.37	3100.01	2.62409	1.39182	0.0166837	0.082847	Up	86.7782	79.3485	74.6331	214.436	247.857	225.043	586	110094569	LOC110094569	probable cysteine protease RD21B	GO:0005829,GO:0005783,GO:0005615,GO:0005764,GO:0099503,GO:0005773,GO:0004197,GO:0051603	cytosol|endoplasmic reticulum|extracellular space|lysosome|secretory vesicle|vacuole|cysteine-type endopeptidase activity|proteolysis involved in cellular protein catabolic process	-	-
XM_020819842.2	494.708	706.695	282.721	0.400061	-1.32171	0.0294524	0.12584	Down	42.4909	56.1236	63.3142	24.5619	23.2166	22.7451	521	110094578	LOC110094578	histone H4	GO:0009507,GO:0005829,GO:0005730,GO:0000786,GO:0005886,GO:0009506,GO:0009579,GO:0005774,GO:0003677,GO:0046982,GO:0006334,GO:0009414	chloroplast|cytosol|nucleolus|nucleosome|plasma membrane|plasmodesma|thylakoid|vacuolar membrane|DNA binding|protein heterodimerization activity|nucleosome assembly|response to water deprivation	-	-
XM_020819850.2	3799.22	752.24	6846.21	9.1011	3.18604	2.35608e-07	7.98606e-06	Up	15.4752	15.5253	15.983	154.661	153.934	156.373	1913	110094584	LOC110094584	plant intracellular Ras-group-related LRR protein 5	GO:0009416	response to light stimulus	-	-
XM_020819856.2	14217.2	24182.6	4251.78	0.17582	-2.50783	2.52241e-05	0.000457575	Down	493.45	489.624	494.15	93.003	94.6609	94.9115	1955	110094591	LOC110094591	probable cytochrome c biosynthesis protein	GO:0016020,GO:0005739,GO:0020037,GO:0015232,GO:0017004	membrane|mitochondrion|heme binding|heme transporter activity|cytochrome complex assembly	-	-
XM_020819887.2	166.724	306.267	27.1808	0.0887487	-3.49413	1.47855e-06	4.01832e-05	Down	7.66292	7.60395	8.10742	0.649837	0.797959	0.79919	1565	110094621	LOC110094621	RING-H2 finger protein ATL3	GO:0016021,GO:0046872,GO:0016740,GO:0016567	integral component of membrane|metal ion binding|transferase activity|protein ubiquitination	-	-
XM_020819888.2	115.332	18.2571	212.408	11.6342	3.54031	5.15907e-06	0.000116842	Up	0.190957	0.0716415	0.257561	2.6075	1.90445	2.09922	4171	110094622	LOC110094622	probable alpha,alpha-trehalose-phosphate synthase [UDP-forming] 7	GO:0005737,GO:0005829,GO:0016757,GO:0016311	cytoplasm|cytosol|transferase activity, transferring glycosyl groups|dephosphorylation	path:dct00500,path:dct01100,path:dct01110	Starch and sucrose metabolism|Metabolic pathways|Biosynthesis of secondary metabolites
XM_020819889.2	2731.56	4948.48	514.642	0.104	-3.26535	1.38447e-07	5.01383e-06	Down	244.75	248.389	249.222	25.82	29.5165	28.684	796	110094623	LOC110094623	pollen-specific protein C13	GO:0005615	extracellular space	-	-
XM_020819894.2	140.901	281.803	0	0	#NAME?	4.11968e-18	1.61957e-15	Down	8.54684	8.15641	7.74567	0	0	0	1377	110094629	LOC110094629	aminotransferase ALD1 homolog	GO:0009507,GO:0009570,GO:0005886,GO:0005507,GO:0010285,GO:0030170,GO:0008483,GO:0009089,GO:0009862	chloroplast|chloroplast stroma|plasma membrane|copper ion binding|L,L-diaminopimelate aminotransferase activity|pyridoxal phosphate binding|transaminase activity|lysine biosynthetic process via diaminopimelate|systemic acquired resistance, salicylic acid mediated signaling pathway	path:dct00300,path:dct01100,path:dct01110,path:dct01230	Lysine biosynthesis|Metabolic pathways|Biosynthesis of secondary metabolites|Biosynthesis of amino acids
XM_020819901.2	288.546	169.83	407.262	2.39806	1.26187	0.0442478	0.168602	Up	4.24597	4.20042	3.64243	9.30144	11.1681	11.0974	1677	110094637	LOC110094637	probable serine/threonine-protein kinase PIX13	-	-	-	-
XM_020819903.2	319.118	157.671	480.565	3.04789	1.60781	0.0102638	0.0581135	Up	3.30337	3.54821	2.47589	8.30813	11.986	10.6452	2019	110094638	LOC110094638	heterogeneous nuclear ribonucleoprotein F, transcript variant X2	-	-	-	-
XM_020819905.2	10.1643	0.674135	19.6545	29.1551	4.86568	0.0128714	0.0684817	Up	0.00870257	0.019117	0.00596838	0.36957	0.233371	0.290761	2902	110094639	LOC110094639	plastidial pyruvate kinase 4, chloroplastic-like, transcript variant X1	GO:0009570,GO:0005737,GO:0005524,GO:0016301,GO:0000287,GO:0030955,GO:0004743,GO:0006096	chloroplast stroma|cytoplasm|ATP binding|kinase activity|magnesium ion binding|potassium ion binding|pyruvate kinase activity|glycolytic process	path:dct00010,path:dct00230,path:dct00620,path:dct01100,path:dct01110,path:dct01200,path:dct01230	Glycolysis / Gluconeogenesis|Purine metabolism|Pyruvate metabolism|Metabolic pathways|Biosynthesis of secondary metabolites|Carbon metabolism|Biosynthesis of amino acids
XM_020819923.2	419.552	765.504	73.6009	0.0961469	-3.37862	2.92816e-07	9.66453e-06	Down	33.9918	36.8148	31.5886	2.70833	2.40104	5.62379	893	110094655	LOC110094655	uncharacterized LOC110094655, transcript variant X1	-	-	-	-
XM_020819930.2	201.605	48.8721	354.338	7.25031	2.85804	3.31053e-05	0.000568729	Up	2.09026	1.84166	1.14897	12.378	11.7065	16.1407	1146	110094659	LOC110094659	inositol-pentakisphosphate 2-kinase IPK1, transcript variant X2	GO:0005623,GO:0005737,GO:0005634,GO:0005524,GO:0035299,GO:0032942,GO:0046872,GO:0030643,GO:0042742,GO:0050832,GO:0051607,GO:0032958,GO:0052746,GO:0048527,GO:0010264,GO:0055062	cell|cytoplasm|nucleus|ATP binding|inositol pentakisphosphate 2-kinase activity|inositol tetrakisphosphate 2-kinase activity|metal ion binding|cellular phosphate ion homeostasis|defense response to bacterium|defense response to fungus|defense response to virus|inositol phosphate biosynthetic process|inositol phosphorylation|lateral root development|myo-inositol hexakisphosphate biosynthetic proce…	path:dct00562,path:dct01100,path:dct04070	Inositol phosphate metabolism|Metabolic pathways|Phosphatidylinositol signaling system
XM_020819936.2	65.0983	5.26076	124.936	23.7486	4.56977	7.13417e-07	2.12141e-05	Up	0.0714903	0.485617	4.64327e-08	2.98506	5.85858	5.45148	1138	110094662	LOC110094662	cytochrome b-c1 complex subunit Rieske-4, mitochondrial, transcript variant X2	GO:0016021,GO:0005750,GO:0005739,GO:0005886,GO:0051537,GO:0046872,GO:0008121,GO:0009060,GO:0009408	integral component of membrane|mitochondrial respiratory chain complex III|mitochondrion|plasma membrane|2 iron, 2 sulfur cluster binding|metal ion binding|ubiquinol-cytochrome-c reductase activity|aerobic respiration|response to heat	path:dct00190,path:dct01100	Oxidative phosphorylation|Metabolic pathways
XM_020819948.2	36.8032	65.8339	7.77244	0.118061	-3.08239	0.00217154	0.0176289	Down	1.28254	1.66313	1.20747	0.21793	0.0757853	0.263697	1889	110094668	LOC110094668	denticleless protein homolog B	GO:0080008,GO:0005634,GO:0030674,GO:0044877,GO:0051301,GO:0006279,GO:0016567,GO:0006511	Cul4-RING E3 ubiquitin ligase complex|nucleus|protein binding, bridging|protein-containing complex binding|cell division|premeiotic DNA replication|protein ubiquitination|ubiquitin-dependent protein catabolic process	-	-
XM_020819959.2	740.72	1324.29	157.155	0.118672	-3.07495	1.17368e-06	3.27836e-05	Down	25.4485	24.1526	24.6058	3.36139	3.15019	3.08401	2131	110094672	LOC110094672	adagio-like protein 3	GO:0005829,GO:0005634,GO:0019005,GO:0009881,GO:0007623,GO:0009911,GO:0016567,GO:0018298,GO:0006355,GO:0009637	cytosol|nucleus|SCF ubiquitin ligase complex|photoreceptor activity|circadian rhythm|positive regulation of flower development|protein ubiquitination|protein-chromophore linkage|regulation of transcription, DNA-templated|response to blue light	path:dct04712	Circadian rhythm - plant
XM_020819967.2	729.626	396.11	1063.14	2.68396	1.42436	0.0164551	0.0819552	Up	4.60846	5.35497	4.20725	13.7747	13.5827	14.0585	3336	110094680	LOC110094680	nuclear poly(A) polymerase 1	GO:0005634,GO:0005524,GO:0046872,GO:0004652,GO:0003723,GO:0009908,GO:0048366,GO:0006378,GO:0008285,GO:0045824,GO:0048451,GO:0043631	nucleus|ATP binding|metal ion binding|polynucleotide adenylyltransferase activity|RNA binding|flower development|leaf development|mRNA polyadenylation|negative regulation of cell population proliferation|negative regulation of innate immune response|petal formation|RNA polyadenylation	path:dct03015	mRNA surveillance pathway
XM_020819968.2	77.8704	10.1456	145.595	14.3506	3.84304	6.96648e-06	0.000150759	Up	0.48126	0.268127	0.683016	7.31101	7.46191	6.98747	870	110094681	LOC110094681	chaperone protein DnaJ-like	GO:0009507,GO:0005634,GO:0061077,GO:1902395,GO:0010322	chloroplast|nucleus|chaperone-mediated protein folding|regulation of 1-deoxy-D-xylulose-5-phosphate synthase activity|regulation of isopentenyl diphosphate biosynthetic process, methylerythritol 4-phosphate pathway	-	-
XM_020819974.2	71.408	19.2565	123.56	6.4165	2.68179	0.000781572	0.00777372	Up	0.0666897	0.952134	0.0989979	1.77745	3.06138	2.94455	2064	110094685	LOC110094685	zinc finger CCCH domain-containing protein 8-like, transcript variant X1	GO:0016607,GO:0005634,GO:0003677,GO:0046872,GO:0003723,GO:0001709,GO:0009908,GO:0006397	nuclear speck|nucleus|DNA binding|metal ion binding|RNA binding|cell fate determination|flower development|mRNA processing	-	-
XM_020819975.2	1950.98	602.665	3299.29	5.47451	2.45273	4.83856e-05	0.000782234	Up	10.9293	9.81816	14.1975	68.5544	69.4336	70.2254	2059	110094685	LOC110094685	zinc finger CCCH domain-containing protein 8-like, transcript variant X2	GO:0016607,GO:0005634,GO:0003677,GO:0046872,GO:0003723,GO:0001709,GO:0009908,GO:0006397	nuclear speck|nucleus|DNA binding|metal ion binding|RNA binding|cell fate determination|flower development|mRNA processing	-	-
XM_020819980.2	644.297	394.534	894.06	2.26611	1.18022	0.0479175	0.17846	Up	6.97425	6.12598	5.78864	15.8239	14.8884	15.8809	2493	110094690	LOC110094690	probable E3 ubiquitin-protein ligase HERC3	GO:0000785,GO:0005829,GO:0005634,GO:0009536,GO:0003682,GO:0005085,GO:0042802,GO:0009881,GO:0042803,GO:0009649,GO:0018298,GO:0009411,GO:0010224	chromatin|cytosol|nucleus|plastid|chromatin binding|guanyl-nucleotide exchange factor activity|identical protein binding|photoreceptor activity|protein homodimerization activity|entrainment of circadian clock|protein-chromophore linkage|response to UV|response to UV-B	-	-
XM_020819981.2	1275.01	2077.22	472.792	0.227608	-2.13538	0.000370908	0.00421596	Down	28.2227	28.0339	27.0811	7.13731	6.90992	6.58632	2977	110094691	LOC110094691	homeobox protein BEL1 homolog	GO:0005829,GO:0005634,GO:0009506,GO:0003677,GO:0003700	cytosol|nucleus|plasmodesma|DNA binding|DNA-binding transcription factor activity	-	-
XM_020819984.2	281.926	84.844	479.007	5.64574	2.49716	0.000138077	0.00188511	Up	1.32005	1.28845	1.53546	8.71832	7.93639	8.72938	2452	110094693	LOC110094693	serine/threonine-protein kinase STY46, transcript variant X1	GO:0005789,GO:0005524,GO:0004674,GO:0004712,GO:0009873,GO:0009686,GO:0010105,GO:0046777,GO:2000069,GO:2000035,GO:0048510,GO:0009723,GO:0009750,GO:0001666,GO:0009744,GO:0010182	endoplasmic reticulum membrane|ATP binding|protein serine/threonine kinase activity|protein serine/threonine/tyrosine kinase activity|ethylene-activated signaling pathway|gibberellin biosynthetic process|negative regulation of ethylene-activated signaling pathway|protein autophosphorylation|regulation of post-embryonic root development|regulation of stem cell division|regulation of timing of tran…	-	-
XM_020819990.2	838.48	435.525	1241.44	2.85043	1.51118	0.0111278	0.0616173	Up	10.1828	9.30324	9.85842	32.4447	28.1602	30.3459	1773	110094697	LOC110094697	mitochondrial inner membrane protein OXA1-like	GO:0031305,GO:0032977,GO:0033617,GO:0051205,GO:0032979	integral component of mitochondrial inner membrane|membrane insertase activity|mitochondrial respiratory chain complex IV assembly|protein insertion into membrane|protein insertion into mitochondrial inner membrane from matrix	path:dct03060	Protein export
XM_020819999.2	28.1179	48.2853	7.95047	0.164656	-2.60247	0.0144088	0.0742517	Down	1.60687	1.87402	1.6844	0.0280835	0.0882879	0.800337	1119	110094472	LOC110094472	serine/arginine-rich splicing factor SR34B, transcript variant X10	GO:0035061,GO:0016607,GO:0005634,GO:0005681,GO:0003729,GO:0003723,GO:0045292,GO:0000381	interchromatin granule|nuclear speck|nucleus|spliceosomal complex|mRNA binding|RNA binding|mRNA cis splicing, via spliceosome|regulation of alternative mRNA splicing, via spliceosome	path:dct03040	Spliceosome
XM_020820002.2	8.99942	0.992588	17.0063	17.1332	4.09873	0.0365156	0.147044	Up	0.0447175	0.0175807	0.00277503	0.475088	0.605275	0.199416	1719	110094705	LOC110094705	GDSL esterase/lipase At3g26430-like	GO:0016788,GO:0019863,GO:0006952	hydrolase activity, acting on ester bonds|IgE binding|defense response	-	-
XM_020820009.2	16.8494	3.44513	30.2537	8.7816	3.13448	0.0193119	0.092635	Up	0.110685	0.343575	0.000240758	2.26274	0.683771	1.60997	864	110094709	LOC110094709	protein FAR1-RELATED SEQUENCE 5-like	GO:0005634,GO:0008270,GO:0006355	nucleus|zinc ion binding|regulation of transcription, DNA-templated	-	-
XM_020820018.2	485.393	787.844	182.942	0.232205	-2.10653	0.000670898	0.00688167	Down	27.2316	24.7188	24.5081	5.92364	6.91213	6.49617	1231	110094720	LOC110094720	clathrin light chain 2-like, transcript variant X1	GO:0030132,GO:0030130,GO:0030125,GO:0005829,GO:0005739,GO:0005886,GO:0032050,GO:0005198,GO:0048268,GO:0072583,GO:0006886	clathrin coat of coated pit|clathrin coat of trans-Golgi network vesicle|clathrin vesicle coat|cytosol|mitochondrion|plasma membrane|clathrin heavy chain binding|structural molecule activity|clathrin coat assembly|clathrin-dependent endocytosis|intracellular protein transport	-	-
XM_020820026.2	260.34	414.648	106.033	0.255717	-1.96738	0.0023568	0.018705	Down	17.2544	17.8334	17.4391	5.5155	4.66611	4.40869	943	110094728	LOC110094728	uncharacterized LOC110094728	-	-	-	-
XM_020820032.2	93.1058	162.072	24.1393	0.148941	-2.74718	0.000347042	0.00401076	Down	4.62768	3.87886	3.4198	0.428208	0.430284	1.05919	1625	110094733	LOC110094733	probable protein kinase At2g41970	-	-	-	-
XM_020820047.2	249.501	424.786	74.2171	0.174717	-2.51691	0.000143444	0.00194396	Down	19.1274	17.8738	18.576	4.01984	2.91512	3.60288	913	110094743	LOC110094743	30S ribosomal protein 3-1, chloroplastic	GO:0009507,GO:0005840,GO:0019843,GO:0003735,GO:0006412	chloroplast|ribosome|rRNA binding|structural constituent of ribosome|translation	-	-
XM_020820063.2	654.516	326.59	982.441	3.00818	1.58889	0.00851194	0.0504082	Up	5.0201	3.65772	3.4913	12.5232	14.2563	13.0333	3206	110094749	LOC110094749	regulator of MON1-CCZ1 complex, transcript variant X1	-	-	-	-
XM_020820071.2	1019.46	1515.65	523.258	0.345236	-1.53435	0.00965396	0.0555964	Down	39.0761	40.0636	36.6827	15.0984	15.7979	12.5728	1563	110094755	LOC110094755	probable mannitol dehydrogenase	GO:0046029,GO:0008270	mannitol dehydrogenase activity|zinc ion binding	-	-
XM_020820075.2	3306.75	4935.59	1677.91	0.339961	-1.55656	0.00741956	0.0455301	Down	45.7568	47.5472	48.014	18.2322	18.0944	15.9258	4171	110094757	LOC110094757	probable RNA-dependent RNA polymerase 1, transcript variant X1	GO:0031380,GO:0005634,GO:0003723,GO:0003968,GO:0006952,GO:0060148,GO:0070919,GO:0030422,GO:0009751,GO:0009615,GO:0010025	nuclear RNA-directed RNA polymerase complex|nucleus|RNA binding|RNA-directed 5'-3' RNA polymerase activity|defense response|positive regulation of posttranscriptional gene silencing|production of siRNA involved in chromatin silencing by small RNA|production of siRNA involved in RNA interference|response to salicylic acid|response to virus|wax biosynthetic process	-	-
XM_020820076.2	1111.64	610.353	1612.93	2.64262	1.40197	0.0174985	0.0858897	Up	8.99388	7.00802	6.39246	22.1374	19.8048	22.3995	3257	110094757	LOC110094757	probable RNA-dependent RNA polymerase 1, transcript variant X3	GO:0031380,GO:0005634,GO:0003723,GO:0003968,GO:0006952,GO:0060148,GO:0070919,GO:0030422,GO:0009751,GO:0009615,GO:0010025	nuclear RNA-directed RNA polymerase complex|nucleus|RNA binding|RNA-directed 5'-3' RNA polymerase activity|defense response|positive regulation of posttranscriptional gene silencing|production of siRNA involved in chromatin silencing by small RNA|production of siRNA involved in RNA interference|response to salicylic acid|response to virus|wax biosynthetic process	-	-
XM_020820079.2	421.63	638.564	204.695	0.320556	-1.64135	0.00698581	0.0433981	Down	23.5023	11.6214	29.4317	8.1652	6.55693	7.78583	1181	110094758	LOC110094758	bifunctional protein FolD 4, chloroplastic, transcript variant X2	GO:0009507,GO:0005829,GO:0004477,GO:0004488,GO:0009853,GO:0035999	chloroplast|cytosol|methenyltetrahydrofolate cyclohydrolase activity|methylenetetrahydrofolate dehydrogenase (NADP+) activity|photorespiration|tetrahydrofolate interconversion	-	-
XM_020820080.2	2097.92	3515.42	680.421	0.193553	-2.3692	7.73276e-05	0.00116172	Down	98.7323	100.947	104.087	21.719	20.864	21.3787	1382	110094759	LOC110094759	glutamine synthetase nodule isozyme	GO:0005737,GO:0005524,GO:0004356,GO:0006542	cytoplasm|ATP binding|glutamate-ammonia ligase activity|glutamine biosynthetic process	path:dct00220,path:dct00250,path:dct00630,path:dct00910,path:dct01100,path:dct01230	Arginine biosynthesis|Alanine, aspartate and glutamate metabolism|Glyoxylate and dicarboxylate metabolism|Nitrogen metabolism|Metabolic pathways|Biosynthesis of amino acids
XM_020820081.2	6348.71	2834.15	9863.27	3.48015	1.79915	0.00200972	0.0165558	Up	33.6327	33.5384	34.4692	127.084	130.047	127.695	3330	110094760	LOC110094760	alpha,alpha-trehalose-phosphate synthase [UDP-forming] 6	GO:0005737,GO:0005829,GO:0003825,GO:0004805,GO:0005992	cytoplasm|cytosol|alpha,alpha-trehalose-phosphate synthase (UDP-forming) activity|trehalose-phosphatase activity|trehalose biosynthetic process	path:dct00500,path:dct01100,path:dct01110	Starch and sucrose metabolism|Metabolic pathways|Biosynthesis of secondary metabolites
XM_020820084.2	193.625	48.4813	338.768	6.9876	2.8048	5.05778e-05	0.000809486	Up	1.21135	0.835331	1.03256	7.45437	7.74059	8.1411	1886	110094762	LOC110094762	uncharacterized LOC110094762	-	-	-	-
XM_020820088.2	25083.3	40785.7	9380.84	0.230003	-2.12027	0.000298983	0.00356217	Down	445.726	440.57	448.533	113.719	108.815	111.48	3649	110094765	LOC110094765	phosphoenolpyruvate carboxylase 2	GO:0005737,GO:0008964,GO:0015977,GO:0006099	cytoplasm|phosphoenolpyruvate carboxylase activity|carbon fixation|tricarboxylic acid cycle	path:dct00620,path:dct00710,path:dct01100,path:dct01200	Pyruvate metabolism|Carbon fixation in photosynthetic organisms|Metabolic pathways|Carbon metabolism
XM_020820090.2	31.7129	54.6438	8.78194	0.160713	-2.63745	0.0112071	0.0619313	Down	0.621634	1.18179	0.282535	0.126975	0.0311517	0.21053	3117	110094766	LOC110094766	serine/threonine-protein kinase EDR1, transcript variant X2	GO:0005739,GO:0005634,GO:0005524,GO:0004674,GO:0004712,GO:0009651,GO:0010182	mitochondrion|nucleus|ATP binding|protein serine/threonine kinase activity|protein serine/threonine/tyrosine kinase activity|response to salt stress|sugar mediated signaling pathway	-	-
XM_020820093.2	35.8356	69.7351	1.93622	0.0277654	-5.17057	8.70114e-06	0.000182663	Down	2.67047	2.04402	2.37939	0.0352287	0.147284	0.0264041	1176	110094768	LOC110094768	annexin A13, transcript variant X1	GO:0048046,GO:0005618,GO:0009507,GO:0009570,GO:0005829,GO:0016020,GO:0005739,GO:0005634,GO:0005886,GO:0009506,GO:0009579,GO:0005774,GO:0005773,GO:0005524,GO:0005509,GO:0005544,GO:0005507,GO:0004601,GO:0042803,GO:0008270,GO:0070588,GO:0110128,GO:0080022,GO:0009737,GO:0046686,GO:0009409,GO:0009408,GO:0006970,GO:0006979,GO:0009651,GO:0009414	apoplast|cell wall|chloroplast|chloroplast stroma|cytosol|membrane|mitochondrion|nucleus|plasma membrane|plasmodesma|thylakoid|vacuolar membrane|vacuole|ATP binding|calcium ion binding|calcium-dependent phospholipid binding|copper ion binding|peroxidase activity|protein homodimerization activity|zinc ion binding|calcium ion transmembrane transport|phloem sucrose unloading|primary root development…	-	-
XM_020820102.2	45.8296	77.46	14.1991	0.183309	-2.44765	0.0070752	0.043818	Down	2.23666	2.28044	2.03559	0.437908	0.469956	0.406011	1409	110094774	LOC110094774	transcription factor MYB20-like	GO:0005634,GO:0003700,GO:0001158,GO:0043565,GO:0044212,GO:0030154,GO:0045892,GO:1901002,GO:2000652	nucleus|DNA-binding transcription factor activity|enhancer sequence-specific DNA binding|sequence-specific DNA binding|transcription regulatory region DNA binding|cell differentiation|negative regulation of transcription, DNA-templated|positive regulation of response to salt stress|regulation of secondary cell wall biogenesis	-	-
XM_020820112.2	435.543	248.163	622.922	2.51013	1.32776	0.0302703	0.128163	Up	12.0135	10.3368	14.8869	34.3644	31.86	35.4587	796	110094787	LOC110094787	protein ELF4-LIKE 3-like, transcript variant X1	GO:0005634,GO:0042803,GO:0009649,GO:0009648,GO:0042753,GO:0048511	nucleus|protein homodimerization activity|entrainment of circadian clock|photoperiodism|positive regulation of circadian rhythm|rhythmic process	-	-
XM_020820116.2	447.44	704.617	190.262	0.270022	-1.88885	0.00222105	0.0179199	Down	30.0381	27.862	30.7275	8.57385	8.71923	8.7545	949	110094790	LOC110094790	rhodanese-like domain-containing protein 14, chloroplastic	GO:0009507,GO:0009941,GO:0009534,GO:0009535,GO:0005856	chloroplast|chloroplast envelope|chloroplast thylakoid|chloroplast thylakoid membrane|cytoskeleton	-	-
XM_020820118.2	745.696	1148.31	343.08	0.298769	-1.7429	0.00371804	0.026723	Down	47.7565	44.6956	45.1101	14.9232	15.878	13.9452	997	110094792	LOC110094792	lactoylglutathione lyase	-	-	-	-
XM_020820129.2	1213.33	1888.87	537.799	0.28472	-1.81238	0.00225594	0.0180997	Down	66.693	62.5321	63.9149	20.74	19.4667	19.6051	1168	110094802	LOC110094802	putative GATA transcription factor 22	GO:0005634,GO:0003700,GO:0043565,GO:0044212,GO:0008270,GO:0010151,GO:0009658,GO:0007623,GO:0009736,GO:0009740,GO:0009910,GO:0009938,GO:0010187,GO:0090693,GO:1902326,GO:0043610,GO:0010380,GO:0010468,GO:2000028,GO:0080050,GO:0010029,GO:0009733,GO:0009735,GO:0009739,GO:0009416,GO:0010167,GO:0010114	nucleus|DNA-binding transcription factor activity|sequence-specific DNA binding|transcription regulatory region DNA binding|zinc ion binding|chloroplast elongation|chloroplast organization|circadian rhythm|cytokinin-activated signaling pathway|gibberellic acid mediated signaling pathway|negative regulation of flower development|negative regulation of gibberellic acid mediated signaling pathway|ne…	-	-
XM_020820138.2	1199.09	618.373	1779.81	2.87821	1.52517	0.00956542	0.0552268	Up	8.37519	9.2047	9.84453	28.6861	28.1779	28.9986	2693	110094810	LOC110094810	U-box domain-containing protein 34	-	-	-	-
XM_020820157.2	24.5756	41.8284	7.32286	0.175069	-2.514	0.025869	0.114494	Down	0.594685	0.392002	0.535393	0.220512	7.96003e-09	0.071981	3297	110094826	LOC110094826	uncharacterized LOC110094826, transcript variant X1	-	-	-	-
XM_020820163.2	224.174	324.007	124.341	0.383759	-1.38173	0.0312813	0.131084	Down	11.4987	9.80635	11.1838	4.58772	4.43544	4.55285	1191	110094829	LOC110094829	ras-related protein RABA4d	GO:0045177,GO:0030659,GO:0005829,GO:0005768,GO:0070382,GO:0090404,GO:0005525,GO:0003924,GO:0019900,GO:0006886,GO:0048868,GO:0009860,GO:0032482,GO:0080092	apical part of cell|cytoplasmic vesicle membrane|cytosol|endosome|exocytic vesicle|pollen tube tip|GTP binding|GTPase activity|kinase binding|intracellular protein transport|pollen tube development|pollen tube growth|Rab protein signal transduction|regulation of pollen tube growth	path:dct04144	Endocytosis
XM_020820164.2	251.694	401.644	101.744	0.253319	-1.98097	0.0022852	0.0182762	Down	5.48391	6.11003	5.11622	1.59043	1.4227	1.58826	2870	110094832	LOC110094832	probably inactive leucine-rich repeat receptor-like protein kinase At5g06940	-	-	-	-
XM_020820169.2	99.8559	9.86308	189.849	19.2484	4.26667	2.79508e-07	9.28626e-06	Up	0.293156	0.129327	0.0292942	2.83303	3.06082	3.84508	2535	110094835	LOC110094835	cysteine-rich receptor-like protein kinase 2	-	-	-	-
XM_020820193.2	8885.81	16198	1573.6	0.0971477	-3.36368	5.2092e-08	2.11218e-06	Down	161.32	158.328	156.351	16.2763	16.6206	17.4142	4064	110094860	LOC110094860	U-box domain-containing protein 44	GO:0005829,GO:0005634,GO:0004842,GO:0009742	cytosol|nucleus|ubiquitin-protein transferase activity|brassinosteroid mediated signaling pathway	-	-
XM_020820194.2	820.419	484.555	1156.28	2.38627	1.25476	0.0334204	0.137694	Up	10.0008	10.3313	8.93768	24.7437	26.9798	24.2916	1976	110094861	LOC110094861	transcription factor bHLH30-like	GO:0005634,GO:0003677,GO:0003700,GO:0046983,GO:0006355	nucleus|DNA binding|DNA-binding transcription factor activity|protein dimerization activity|regulation of transcription, DNA-templated	-	-
XM_020820203.2	61.7492	117.095	6.40298	0.0546817	-4.1928	5.81456e-06	0.000129262	Down	1.04788	2.14139	1.8838	0.125774	0.150627	0.0334807	2747	110094868	LOC110094868	probable metal-nicotianamine transporter YSL9, transcript variant X2	GO:0005623,GO:0016021,GO:0005886,GO:0051980,GO:0010039,GO:0048316	cell|integral component of membrane|plasma membrane|iron-nicotianamine transmembrane transporter activity|response to iron ion|seed development	-	-
XM_020820213.2	960.256	214.159	1706.35	7.96771	2.99416	1.67017e-06	4.47461e-05	Up	11.1913	11.3378	11.6076	103.606	96.0015	95.9728	750	110094875	LOC110094875	uncharacterized LOC110094875	-	-	-	-
XM_020820231.2	4661.49	7552.22	1770.77	0.23447	-2.09253	0.000378201	0.00428433	Down	110.183	108.74	108.811	27.2374	28.1936	28.174	2752	110094891	LOC110094891	elongation factor G-2, chloroplastic	GO:0009507,GO:0005525,GO:0003924,GO:0003746,GO:0032790	chloroplast|GTP binding|GTPase activity|translation elongation factor activity|ribosome disassembly	-	-
XM_020820243.2	11.9958	22.6971	1.29456	0.0570363	-4.13198	0.0145064	0.074653	Down	1.04989	0.6122	0.781999	0.073527	3.73972e-12	0.0746412	1112	110094902	LOC110094902	vacuolar iron transporter homolog 2	GO:0005623,GO:0016021,GO:0005774,GO:0005381,GO:0005384,GO:0006879,GO:0030026,GO:0006880,GO:0010039	cell|integral component of membrane|vacuolar membrane|iron ion transmembrane transporter activity|manganese ion transmembrane transporter activity|cellular iron ion homeostasis|cellular manganese ion homeostasis|intracellular sequestering of iron ion|response to iron ion	-	-
XM_020820256.2	77.2846	138.736	15.8327	0.114121	-3.13136	0.000124671	0.00173396	Down	4.78713	3.13486	3.96883	0.674068	0.158313	0.64728	1390	110094904	LOC110094904	phosphatidylinositol transfer protein CSR1, transcript variant X2	GO:0005829,GO:0005768,GO:0005811,GO:0008526,GO:0043001,GO:0045717,GO:1901352,GO:0046488,GO:0009395,GO:2001247	cytosol|endosome|lipid droplet|phosphatidylinositol transfer activity|Golgi to plasma membrane protein transport|negative regulation of fatty acid biosynthetic process|negative regulation of phosphatidylglycerol biosynthetic process|phosphatidylinositol metabolic process|phospholipid catabolic process|positive regulation of phosphatidylcholine biosynthetic process	-	-
XM_020820260.2	15.3921	29.5268	1.25737	0.0425841	-4.55354	0.00365133	0.0263705	Down	1.26542	0.976144	0.53306	0.130914	5.07159e-07	0.0121778	1273	110094904	LOC110094904	phosphatidylinositol transfer protein CSR1, transcript variant X3	GO:0005794,GO:0000139,GO:0008526,GO:0006657,GO:0006892,GO:0015031	Golgi apparatus|Golgi membrane|phosphatidylinositol transfer activity|CDP-choline pathway|post-Golgi vesicle-mediated transport|protein transport	-	-
XM_020820265.2	21.0329	0.324279	41.7416	128.721	7.00811	3.56934e-05	0.000604583	Up	4.93627e-46	4.12159e-65	0.0628503	2.07071	3.13678	2.61905	690	110094920	LOC110094920	cyanidin 3-O-rutinoside 5-O-glucosyltransferase-like	GO:0047214,GO:0009718	cyanidin-3-rhamnosylglucoside 5-O-glucosyltransferase activity|anthocyanin-containing compound biosynthetic process	-	-
XM_020820272.2	363.989	159.766	568.212	3.55653	1.83047	0.00343375	0.025185	Up	7.52782	8.21321	8.93204	29.6673	35.2111	30.6731	773	110094926	LOC110094926	pentatricopeptide repeat-containing protein At5g67570, chloroplastic-like	-	-	-	-
XM_020820281.2	510.926	206.423	815.428	3.95027	1.98195	0.00129426	0.0116793	Up	5.49911	5.36799	5.40853	23.7123	23.6893	22.5283	1515	110094935	LOC110094935	probable carboxylesterase 2	GO:0016787,GO:0080030,GO:0009056	hydrolase activity|methyl indole-3-acetate esterase activity|catabolic process	-	-
XM_020820300.2	523.224	140.404	906.044	6.45314	2.69	2.15247e-05	0.000399591	Up	5.74788	4.7152	4.50542	34.4837	35.5949	34.9404	1121	110094951	LOC110094951	uncharacterized LOC110094951	-	-	-	-
XM_020820302.2	3058.22	1917.7	4198.75	2.18948	1.13059	0.0496345	0.182913	Up	17.0795	16.1294	16.3618	38.4553	39.2048	40.4245	4620	110094953	LOC110094953	pre-mRNA-splicing factor ATP-dependent RNA helicase DEAH7, transcript variant X1	-	-	path:dct03040	Spliceosome
XM_020820303.2	460.697	111.409	809.984	7.27037	2.86203	6.76541e-06	0.000147117	Up	0.743437	1.72568	0.813428	8.86555	8.62353	8.46916	4055	110094953	LOC110094953	pre-mRNA-splicing factor ATP-dependent RNA helicase DEAH7, transcript variant X2	-	-	path:dct03040	Spliceosome
XM_020820313.2	5241.95	2976.65	7507.24	2.52204	1.33459	0.020467	0.096535	Up	90.2109	89.2382	91.2833	238.803	252.379	251.724	1313	110094959	LOC110094959	protein SGT1 homolog, transcript variant X1	GO:0005737,GO:0005634,GO:0042742,GO:0050832,GO:0050821,GO:2000072,GO:0031647	cytoplasm|nucleus|defense response to bacterium|defense response to fungus|protein stabilization|regulation of defense response to fungus, incompatible interaction|regulation of protein stability	path:dct04626	Plant-pathogen interaction
XM_020820319.2	623.648	994.548	252.748	0.254134	-1.97634	0.000942202	0.00904053	Down	21.1747	6.39603	22.4453	0.775701	7.31708	5.75874	2374	110094963	LOC110094963	probable methyltransferase PMT3, transcript variant X3	GO:0005768,GO:0005794,GO:0000139,GO:0016021,GO:0005802,GO:0005774,GO:0008168	endosome|Golgi apparatus|Golgi membrane|integral component of membrane|trans-Golgi network|vacuolar membrane|methyltransferase activity	-	-
XM_020820320.2	190.81	271.338	110.282	0.406439	-1.29889	0.0442267	0.168564	Down	6.10667	3.11222	3.45944	2.08592	1.25006	2.27835	2558	110094964	LOC110094964	probable methyltransferase PMT3, transcript variant X1	GO:0005768,GO:0005794,GO:0000139,GO:0016021,GO:0005634,GO:0005802,GO:0005774,GO:0008168	endosome|Golgi apparatus|Golgi membrane|integral component of membrane|nucleus|trans-Golgi network|vacuolar membrane|methyltransferase activity	-	-
XM_020820337.2	10.8046	0	21.6093	Inf	Inf	0.00137331	0.0122281	Up	0	0	0	1.11467	0.889158	0.937203	951	110094977	LOC110094977	protein G1-like4	GO:0005634,GO:0003677,GO:0010492,GO:0009299,GO:0010199,GO:0048441,GO:0090698,GO:0009416,GO:0048834	nucleus|DNA binding|maintenance of shoot apical meristem identity|mRNA transcription|organ boundary specification between lateral organs and the meristem|petal development|post-embryonic plant morphogenesis|response to light stimulus|specification of petal number	-	-
XM_020820342.2	19.2626	2.38391	36.1413	15.1605	3.92225	0.00346799	0.0253868	Up	0.0761513	0.139135	0.0258801	1.52793	1.40835	1.39968	1084	110094980	LOC110094980	protein G1-like3	GO:0005634,GO:0003677,GO:0010492,GO:0009299,GO:0010199,GO:0048441,GO:0090698,GO:0009416,GO:0048834	nucleus|DNA binding|maintenance of shoot apical meristem identity|mRNA transcription|organ boundary specification between lateral organs and the meristem|petal development|post-embryonic plant morphogenesis|response to light stimulus|specification of petal number	-	-
XM_020820348.2	1702.24	1035.03	2369.45	2.28925	1.19487	0.0392476	0.154575	Up	8.56689	8.56179	8.12882	21.1482	21.0881	20.6681	4894	110094955	LOC110094955	zinc finger CCCH domain-containing protein 19	GO:0005829,GO:0005634,GO:0003677,GO:0042393,GO:0046872,GO:0032776,GO:0031047,GO:0010964	cytosol|nucleus|DNA binding|histone binding|metal ion binding|DNA methylation on cytosine|gene silencing by RNA|regulation of chromatin silencing by small RNA	-	-
XM_020820371.2	134.189	37.854	230.524	6.08981	2.6064	0.000274713	0.00332554	Up	0.561196	1.09301	1.07978	5.78843	5.81497	6.43047	1660	110095007	LOC110095007	flavin-containing monooxygenase FMO GS-OX5-like	GO:0050660,GO:0004499,GO:0050661	flavin adenine dinucleotide binding|N,N-dimethylaniline monooxygenase activity|NADP binding	-	-
XM_020820374.2	47.3565	83.4506	11.2623	0.134958	-2.88942	0.001729	0.0147217	Down	1.62638	1.74378	0.980835	0.372251	0.00680534	0.259118	2290	110095010	LOC110095010	MLO-like protein 9, transcript variant X2	GO:0016021,GO:0005886,GO:0005516,GO:0006952,GO:0009607	integral component of membrane|plasma membrane|calmodulin binding|defense response|response to biotic stimulus	-	-
XM_020820380.1	205.745	25.002	386.488	15.4583	3.95031	5.41694e-08	2.19052e-06	Up	0.629428	0.455731	0.887818	13.6415	8.02809	11.0671	1533	110095017	LOC110095017	2-oxoglutarate-Fe(II) type oxidoreductase hxnY, transcript variant X1	GO:0051213,GO:0046872	dioxygenase activity|metal ion binding	-	-
XM_020820382.2	151.108	70.6954	231.522	3.27492	1.71146	0.0121706	0.0658567	Up	1.06614	1.0276	0.991624	3.5612	3.93401	3.51046	2735	110095018	LOC110095018	uncharacterized LOC110095018	-	-	-	-
XM_020820384.2	307.312	431.292	183.331	0.425075	-1.23421	0.0468988	0.17562	Down	26.3543	23.9232	24.5024	10.8823	11.4605	12.2417	689	110095020	LOC110095020	trafficking protein particle complex subunit 2-like protein	GO:0005829,GO:0005794,GO:0005634,GO:0006888	cytosol|Golgi apparatus|nucleus|endoplasmic reticulum to Golgi vesicle-mediated transport	-	-
XM_020820389.2	36.3448	9.78547	62.9041	6.42832	2.68444	0.0061832	0.0395691	Up	0.461055	0.683979	0.231303	3.30038	3.26741	2.89503	862	110095026	LOC110095026	NEP1-interacting protein-like 1	GO:0009535,GO:0016021,GO:0046872	chloroplast thylakoid membrane|integral component of membrane|metal ion binding	-	-
XM_020820396.2	442.332	744.093	140.571	0.188915	-2.40419	0.000140961	0.00191635	Down	29.2314	31.208	29.6705	6.91809	5.79595	5.77164	986	110095030	LOC110095030	uncharacterized LOC110095030	-	-	-	-
XM_020820400.1	30.8495	9.39028	52.3087	5.57052	2.47781	0.0160784	0.080544	Up	0.107744	0.214816	0.186662	1.03212	0.998916	1.00297	2238	110095035	LOC110095035	uncharacterized LOC110095035	-	-	-	-
XM_020820401.2	195.58	334.629	56.5305	0.168935	-2.56546	0.000176466	0.00231162	Down	9.18457	10.5286	9.53761	2.14451	2.06971	1.13932	1366	110095032	LOC110095032	transcription factor UNE10, transcript variant X1	GO:0005634,GO:0003677,GO:0046983,GO:0090229,GO:0006355	nucleus|DNA binding|protein dimerization activity|negative regulation of red or far-red light signaling pathway|regulation of transcription, DNA-templated	-	-
XM_020820402.2	605.263	856.806	353.72	0.412835	-1.27636	0.0337227	0.138523	Down	16.1987	18.4843	17.1058	8.65344	7.32947	7.26798	1976	110095036	LOC110095036	protein DETOXIFICATION 33	GO:0016021,GO:0016020,GO:0005634,GO:0005774,GO:0015297,GO:0022857,GO:0042910	integral component of membrane|membrane|nucleus|vacuolar membrane|antiporter activity|transmembrane transporter activity|xenobiotic transmembrane transporter activity	-	-
XM_020820407.2	205.047	359.966	50.128	0.139258	-2.84417	3.25288e-05	0.00056042	Down	10.093	9.51697	11.9567	1.70165	1.18349	1.86234	1363	110095032	LOC110095032	transcription factor UNE10, transcript variant X3	GO:0005634,GO:0003677,GO:0046983,GO:0090229,GO:0006355	nucleus|DNA binding|protein dimerization activity|negative regulation of red or far-red light signaling pathway|regulation of transcription, DNA-templated	-	-
XM_020820408.2	69.008	17.7956	120.22	6.75564	2.75609	0.000979032	0.00931981	Up	0.594967	0.0722857	0.753806	3.52888	3.31133	3.71484	1479	110095042	LOC110095042	uncharacterized LOC110095042, transcript variant X1	-	-	-	-
XM_020820417.2	498.951	915.732	82.1706	0.0897321	-3.47823	1.10372e-07	4.10553e-06	Down	64.9564	52.7446	60.7121	4.84973	6.60682	5.95289	613	110095049	LOC110095049	histone H2A	GO:0000786,GO:0005634,GO:0003677,GO:0046982	nucleosome|nucleus|DNA binding|protein heterodimerization activity	-	-
XM_020820419.2	653.78	937.716	369.843	0.394408	-1.34224	0.0247002	0.110899	Down	22.6776	23.0441	24.4895	10.5526	9.86468	9.70271	1595	110095047	LOC110095047	anthranilate phosphoribosyltransferase, chloroplastic	GO:0009507,GO:0009941,GO:0009570,GO:0005829,GO:0009536,GO:0004048,GO:0000162	chloroplast|chloroplast envelope|chloroplast stroma|cytosol|plastid|anthranilate phosphoribosyltransferase activity|tryptophan biosynthetic process	path:dct00400,path:dct01100,path:dct01110,path:dct01230	Phenylalanine, tyrosine and tryptophan biosynthesis|Metabolic pathways|Biosynthesis of secondary metabolites|Biosynthesis of amino acids
XM_020820427.2	2221.56	1165.19	3277.93	2.81322	1.49222	0.0103766	0.0585544	Up	21.684	20.92	20.8694	66.4195	62.883	64.9867	2192	110095059	LOC110095059	pentatricopeptide repeat-containing protein At5g13770, chloroplastic	-	-	-	-
XM_020820428.2	770.985	412.814	1129.16	2.73527	1.45168	0.0147632	0.0755751	Up	14.7416	15.356	15.9237	43.7538	47.6944	45.5357	1071	110095060	LOC110095060	uncharacterized LOC110095060	-	-	-	-
XM_020820431.2	394.827	635.896	153.758	0.241798	-2.04812	0.00111545	0.0103698	Down	14.3364	15.1032	12.6116	4.28846	3.29625	3.48178	1806	110095064	LOC110095064	cytochrome P450 71A1-like	GO:0016021,GO:0020037,GO:0005506,GO:0016709	integral component of membrane|heme binding|iron ion binding|oxidoreductase activity, acting on paired donors, with incorporation or reduction of molecular oxygen, NAD(P)H as one donor, and incorporation of one atom of oxygen	-	-
XM_020820435.2	172.611	273.518	71.7047	0.262157	-1.9315	0.00423465	0.0295573	Down	3.07782	3.05967	2.6678	0.866759	0.780583	0.862629	3709	110095067	LOC110095067	pentatricopeptide repeat-containing protein At3g24000, mitochondrial	-	-	-	-
XM_020820437.2	272.566	20.0496	525.083	26.1893	4.7109	1.23655e-10	9.49182e-09	Up	0.424313	0.347757	0.0211024	7.84915	7.23575	7.69062	2995	110095069	LOC110095069	monosaccharide-sensing protein 2, transcript variant X2	GO:0005794,GO:0005887,GO:0005886,GO:0005774,GO:0005773,GO:0005351	Golgi apparatus|integral component of plasma membrane|plasma membrane|vacuolar membrane|vacuole|carbohydrate:proton symporter activity	-	-
XM_020820438.2	193.768	64.7392	322.797	4.98611	2.31791	0.000602066	0.00628461	Up	1.41203	0.822136	0.367064	4.63547	6.79693	2.65537	2976	110095069	LOC110095069	monosaccharide-sensing protein 2, transcript variant X1	GO:0005794,GO:0005887,GO:0005886,GO:0005774,GO:0005773,GO:0005351	Golgi apparatus|integral component of plasma membrane|plasma membrane|vacuolar membrane|vacuole|carbohydrate:proton symporter activity	-	-
XM_020820450.2	29.5263	55.5446	3.50794	0.0631554	-3.98495	0.000524106	0.00559869	Down	2.00429	1.39962	0.0658357	0.123793	0.0829079	0.0158648	1911	110095074	LOC110095074	uncharacterized aarF domain-containing protein kinase 1, transcript variant X1	-	-	-	-
XM_020820484.2	40.9428	10.3394	71.5461	6.91974	2.79072	0.00389934	0.0276975	Up	1.14791	0.191008	0.00031651	4.98757	1.02606	3.98977	928	110095063	LOC110095063	ribonuclease H2 subunit A, transcript variant X7	GO:0032299,GO:0046872,GO:0003723,GO:0004523,GO:0043137,GO:0006298	ribonuclease H2 complex|metal ion binding|RNA binding|RNA-DNA hybrid ribonuclease activity|DNA replication, removal of RNA primer|mismatch repair	path:dct03030	DNA replication
XM_020820487.2	9019.14	5035.6	13002.7	2.58215	1.36857	0.0170928	0.084342	Up	96.2112	98.4208	94.3535	278.565	265.631	267.581	2081	110095096	LOC110095096	V-type proton ATPase catalytic subunit A	GO:0005618,GO:0009941,GO:0005794,GO:0000325,GO:0005886,GO:0009506,GO:0033180,GO:0005774,GO:0005524,GO:0002020,GO:0046961,GO:0046034,GO:0007030,GO:0009555	cell wall|chloroplast envelope|Golgi apparatus|plant-type vacuole|plasma membrane|plasmodesma|proton-transporting V-type ATPase, V1 domain|vacuolar membrane|ATP binding|protease binding|proton-transporting ATPase activity, rotational mechanism|ATP metabolic process|Golgi organization|pollen development	path:dct00190,path:dct01100,path:dct04145	Oxidative phosphorylation|Metabolic pathways|Phagosome
XM_020820498.2	47.674	5.70925	89.6388	15.7006	3.97275	4.60484e-05	0.000751547	Up	0.130613	0.264066	0.202901	2.8711	3.98432	3.61699	1112	110095102	LOC110095102	B3 domain-containing protein Os03g0212300, transcript variant X1	GO:0005634,GO:0003677	nucleus|DNA binding	-	-
XM_020820499.2	28.5332	5.04322	52.0232	10.3155	3.36674	0.00246134	0.0193766	Up	0.248776	0.270393	0.0492424	1.88178	2.24567	1.9922	1109	110095102	LOC110095102	B3 domain-containing protein Os03g0212300, transcript variant X2	GO:0005634,GO:0003677	nucleus|DNA binding	-	-
XM_020820500.2	13.9883	0	27.9766	Inf	Inf	0.000224841	0.00282852	Up	4.89153e-21	1.14536e-23	6.16867e-24	4.5611	5.68468e-06	0.000583557	797	110095102	LOC110095102	B3 domain-containing protein Os03g0212300, transcript variant X4	GO:0005634,GO:0003677	nucleus|DNA binding	-	-
XM_020820505.2	661.615	402.391	920.839	2.28842	1.19435	0.0451901	0.171189	Up	4.52986	4.12923	4.35875	10.8589	10.6464	10.8867	3694	110095108	LOC110095108	probable phospholipid-transporting ATPase 8, transcript variant X1	GO:0016021,GO:0005886,GO:0005524,GO:0140326,GO:0000287,GO:0045332	integral component of membrane|plasma membrane|ATP binding|ATPase-coupled intramembrane lipid transporter activity|magnesium ion binding|phospholipid translocation	-	-
XM_020820518.2	247.9	0	495.8	Inf	Inf	2.36735e-22	2.23175e-19	Up	0	0	0	11.4101	10.8046	13.793	1789	110095116	LOC110095116	protection of telomeres protein 1a, transcript variant X2	GO:0000783,GO:0098505,GO:0003723,GO:0043047,GO:0010521,GO:0042162,GO:0051974,GO:0032206,GO:0032212,GO:0032210,GO:0016233,GO:0000723	nuclear telomere cap complex|G-rich strand telomeric DNA binding|RNA binding|single-stranded telomeric DNA binding|telomerase inhibitor activity|telomeric DNA binding|negative regulation of telomerase activity|positive regulation of telomere maintenance|positive regulation of telomere maintenance via telomerase|regulation of telomere maintenance via telomerase|telomere capping|telomere maintenance	-	-
XM_020820522.2	12.5152	0	25.0304	Inf	Inf	0.000508754	0.00545594	Up	0	0	0	1.44928	0.700789	3.34539e-09	1518	110095116	LOC110095116	protection of telomeres protein 1a, transcript variant X4	GO:0000783,GO:0098505,GO:0003723,GO:0043047,GO:0010521,GO:0042162,GO:0051974,GO:0032206,GO:0032212,GO:0032210,GO:0016233,GO:0000723	nuclear telomere cap complex|G-rich strand telomeric DNA binding|RNA binding|single-stranded telomeric DNA binding|telomerase inhibitor activity|telomeric DNA binding|negative regulation of telomerase activity|positive regulation of telomere maintenance|positive regulation of telomere maintenance via telomerase|regulation of telomere maintenance via telomerase|telomere capping|telomere maintenance	-	-
XM_020820526.2	135.965	235.47	36.4613	0.154845	-2.6911	0.000180943	0.00235829	Down	6.18342	4.80309	4.9863	1.01859	0.770237	0.901736	1760	110095121	LOC110095121	U-box domain-containing protein 4, transcript variant X2	GO:0005737,GO:0005634,GO:0004842,GO:0016567	cytoplasm|nucleus|ubiquitin-protein transferase activity|protein ubiquitination	-	-
XM_020820527.2	50.0424	81.9146	18.1701	0.221818	-2.17255	0.0131388	0.0695488	Down	1.04935	2.01296	2.21842	0.299581	0.453127	0.512763	1853	110095121	LOC110095121	U-box domain-containing protein 4, transcript variant X1	GO:0005737,GO:0005634,GO:0004842,GO:0016567	cytoplasm|nucleus|ubiquitin-protein transferase activity|protein ubiquitination	-	-
XM_020820529.2	14.0522	0.998413	27.1059	27.149	4.76283	0.0040492	0.0285003	Up	0.0233065	0.0253043	0.0235615	0.701239	1.07384	0.665601	1448	110095123	LOC110095123	brassinosteroid-related acyltransferase 1	GO:0005783,GO:0005634,GO:0003996,GO:0016747,GO:0016132,GO:0010087,GO:0001558,GO:0009737,GO:0009733,GO:0009741	endoplasmic reticulum|nucleus|acyl-CoA ligase activity|transferase activity, transferring acyl groups other than amino-acyl groups|brassinosteroid biosynthetic process|phloem or xylem histogenesis|regulation of cell growth|response to abscisic acid|response to auxin|response to brassinosteroid	path:dct00073	Cutin, suberine and wax biosynthesis
XM_020820530.2	310.766	493.622	127.911	0.259127	-1.94827	0.00202349	0.016642	Down	6.27748	6.01991	12.8775	1.95826	2.51028	2.62656	2340	110095124	LOC110095124	uncharacterized LOC110095124, transcript variant X1	-	-	-	-
XM_020820536.2	56.9113	108.962	4.86055	0.0446078	-4.48656	2.88848e-06	7.12267e-05	Down	2.82116	3.43818	3.16935	0.0574321	0.273632	0.127065	1383	110095127	LOC110095127	alpha/beta hydrolase domain-containing protein 17B	GO:0005783,GO:0016021,GO:0016788	endoplasmic reticulum|integral component of membrane|hydrolase activity, acting on ester bonds	-	-
XM_020820541.2	57.0946	88.2923	25.8969	0.293309	-1.76951	0.032352	0.134153	Down	2.31099	1.88447	2.21169	0.561041	0.725591	0.729021	1649	110095130	LOC110095130	probable serine/threonine-protein kinase PIX13	-	-	-	-
XM_020820542.2	841.643	1547.2	136.085	0.0879558	-3.50708	4.86135e-08	1.98956e-06	Down	45.0058	45.474	45.3112	4.84605	4.02947	4.12228	1361	110095131	LOC110095131	NPC intracellular cholesterol transporter 1-related protein 1-like, transcript variant X1	GO:0005783,GO:0000329,GO:0016021,GO:0098772,GO:0006869,GO:0006665	endoplasmic reticulum|fungal-type vacuole membrane|integral component of membrane|molecular function regulator|lipid transport|sphingolipid metabolic process	-	-
XM_020820547.2	160.502	285.777	35.2276	0.12327	-3.02011	2.27423e-05	0.000417824	Down	10.5783	10.0974	9.77103	1.33983	1.28913	1.42927	1121	110095133	LOC110095133	uncharacterized LOC110095133	-	-	-	-
XM_020820552.2	158.494	270.751	46.2382	0.170778	-2.54981	0.000262974	0.00320896	Down	4.86327	4.75303	4.97885	0.827068	0.935629	0.946291	2218	110095139	LOC110095139	UDP-glucuronate 4-epimerase 4-like	GO:0032580,GO:0016021,GO:0016020,GO:0050378,GO:0005975	Golgi cisterna membrane|integral component of membrane|membrane|UDP-glucuronate 4-epimerase activity|carbohydrate metabolic process	path:dct00520,path:dct01100	Amino sugar and nucleotide sugar metabolism|Metabolic pathways
XM_020820557.2	320.866	552.171	89.5604	0.162197	-2.62418	5.37542e-05	0.000849006	Down	8.51311	8.00343	8.34748	1.4174	1.40137	1.56574	2651	110095141	LOC110095141	LRR receptor kinase SERK2	-	-	-	-
XM_020820566.2	52.3689	2.30946	102.428	44.3517	5.47092	2.27407e-07	7.76038e-06	Up	0.175793	0.120332	0.0363428	5.82461	5.24835	6.01239	779	110095151	LOC110095151	WUSCHEL-related homeobox 8-like	GO:0005634,GO:0003677,GO:0007275	nucleus|DNA binding|multicellular organism development	-	-
XM_020820577.2	1657.22	2319.25	995.2	0.429104	-1.2206	0.035483	0.14395	Down	19.6544	19.137	18.8791	9.12641	8.87744	8.91909	4803	110095159	LOC110095159	ABC transporter G family member 39	GO:0016021,GO:0005886,GO:0005524,GO:0016887,GO:0042626,GO:0055085	integral component of membrane|plasma membrane|ATP binding|ATPase activity|ATPase-coupled transmembrane transporter activity|transmembrane transport	-	-
XM_020820579.2	323.493	469.214	177.772	0.378873	-1.40021	0.0249263	0.111499	Down	3.47898	4.03476	3.63894	1.28523	1.861	1.452	5024	110095160	LOC110095160	ABC transporter G family member 36, transcript variant X2	GO:0016021,GO:0005886,GO:0005524,GO:0016887,GO:0042626,GO:0055085	integral component of membrane|plasma membrane|ATP binding|ATPase activity|ATPase-coupled transmembrane transporter activity|transmembrane transport	-	-
XM_020820580.1	47.128	72.6411	21.6149	0.297558	-1.74876	0.0458868	0.173102	Down	1.71067	1.62727	1.71145	0.666834	0.397019	0.593735	1716	110095161	LOC110095161	DELLA protein SLR1-like	GO:0005634,GO:0003700,GO:0043565,GO:0003712,GO:0009740,GO:0042538,GO:0009867,GO:0009938,GO:0010187,GO:2000377,GO:2000033,GO:0009737,GO:0009723,GO:0009863	nucleus|DNA-binding transcription factor activity|sequence-specific DNA binding|transcription coregulator activity|gibberellic acid mediated signaling pathway|hyperosmotic salinity response|jasmonic acid mediated signaling pathway|negative regulation of gibberellic acid mediated signaling pathway|negative regulation of seed germination|regulation of reactive oxygen species metabolic process|regul…	path:dct04075	Plant hormone signal transduction
XM_020820593.2	99.4623	170.945	27.98	0.163679	-2.61106	0.000571666	0.00601936	Down	1.77741	1.89426	2.68667	0.677778	0.00129315	0.457141	3211	110095170	LOC110095170	tRNase Z TRZ3, mitochondrial, transcript variant X2	GO:0005739,GO:0042781,GO:0046872,GO:0072684,GO:0042780	mitochondrion|3'-tRNA processing endoribonuclease activity|metal ion binding|mitochondrial tRNA 3'-trailer cleavage, endonucleolytic|tRNA 3'-end processing	path:dct03013	RNA transport
XM_020820603.2	9.18251	0	18.365	Inf	Inf	0.00348371	0.0254833	Up	3.90039e-17	1.12997e-11	0.000830003	1.04333	0.900934	0.786178	867	110095173	LOC110095173	probable inactive nicotinamidase At3g16190, transcript variant X4	GO:0005829,GO:0003824	cytosol|catalytic activity	-	-
XM_020820605.2	115.293	176.552	54.0343	0.306053	-1.70815	0.0170635	0.0842341	Down	3.5279	3.11624	1.28158	0.961908	1.0772	0.607367	2661	110095175	LOC110095175	peroxisomal fatty acid beta-oxidation multifunctional protein, transcript variant X1	GO:0005618,GO:0005874,GO:0005777,GO:0009506,GO:0018812,GO:0003857,GO:0008692,GO:0004165,GO:0004300,GO:0008017,GO:0003729,GO:0006635,GO:0009908,GO:0009695	cell wall|microtubule|peroxisome|plasmodesma|3-hydroxyacyl-CoA dehydratase activity|3-hydroxyacyl-CoA dehydrogenase activity|3-hydroxybutyryl-CoA epimerase activity|dodecenoyl-CoA delta-isomerase activity|enoyl-CoA hydratase activity|microtubule binding|mRNA binding|fatty acid beta-oxidation|flower development|jasmonic acid biosynthetic process	path:dct00071,path:dct00592,path:dct01100,path:dct01110,path:dct01212	Fatty acid degradation|alpha-Linolenic acid metabolism|Metabolic pathways|Biosynthesis of secondary metabolites|Fatty acid metabolism
XM_020820613.2	64.8054	103.349	26.262	0.25411	-1.97647	0.014311	0.073912	Down	2.89552	2.59363	2.8851	0.623941	0.738701	0.931444	1477	110095178	LOC110095178	peroxidase 31-like	GO:0005576,GO:0020037,GO:0046872,GO:0004601,GO:0009044,GO:0042744,GO:0006979	extracellular region|heme binding|metal ion binding|peroxidase activity|xylan 1,4-beta-xylosidase activity|hydrogen peroxide catabolic process|response to oxidative stress	path:dct00940,path:dct01100,path:dct01110	Phenylpropanoid biosynthesis|Metabolic pathways|Biosynthesis of secondary metabolites
XM_020820619.2	1152.23	1663.91	640.549	0.384966	-1.3772	0.0189064	0.0912883	Down	43.7483	41.7144	43.1432	18.0121	18.4756	17.3848	1545	110095188	LOC110095188	uncharacterized LOC110095188, transcript variant X2	GO:0009507,GO:0009535,GO:0010287	chloroplast|chloroplast thylakoid membrane|plastoglobule	-	-
XM_020820626.2	10.9279	1.42272	20.4331	14.362	3.84418	0.0250088	0.111786	Up	0.0101973	0.0827697	0.000322841	0.189422	0.791924	0.439629	1834	110095192	LOC110095192	NADPH:adrenodoxin oxidoreductase, mitochondrial, transcript variant X1	GO:0005739,GO:0005886,GO:0050660,GO:0015039,GO:0016731,GO:0009102,GO:0022900	mitochondrion|plasma membrane|flavin adenine dinucleotide binding|NADPH-adrenodoxin reductase activity|oxidoreductase activity, acting on iron-sulfur proteins as donors, NAD or NADP as acceptor|biotin biosynthetic process|electron transport chain	-	-
XM_020820628.2	22.2843	2.09686	42.4718	20.255	4.3402	0.000823059	0.00809825	Up	0.0154937	0.128599	0.000468732	0.368215	1.85508	0.878046	1781	110095192	LOC110095192	NADPH:adrenodoxin oxidoreductase, mitochondrial, transcript variant X3	GO:0005739,GO:0005886,GO:0050660,GO:0015039,GO:0016731,GO:0009102,GO:0022900	mitochondrion|plasma membrane|flavin adenine dinucleotide binding|NADPH-adrenodoxin reductase activity|oxidoreductase activity, acting on iron-sulfur proteins as donors, NAD or NADP as acceptor|biotin biosynthetic process|electron transport chain	-	-
XM_020820629.2	72.3161	0	144.632	Inf	Inf	5.57164e-13	7.27618e-11	Up	0.000912559	1.219e-11	0.000472057	2.43951	5.83857	2.5522	1732	110095192	LOC110095192	NADPH:adrenodoxin oxidoreductase, mitochondrial, transcript variant X4	GO:0005739,GO:0005886,GO:0050660,GO:0015039,GO:0016731,GO:0009102,GO:0022900	mitochondrion|plasma membrane|flavin adenine dinucleotide binding|NADPH-adrenodoxin reductase activity|oxidoreductase activity, acting on iron-sulfur proteins as donors, NAD or NADP as acceptor|biotin biosynthetic process|electron transport chain	-	-
XM_020820643.2	975.67	411.872	1539.47	3.73773	1.90216	0.00147211	0.0129171	Up	9.6149	9.61404	8.29229	38.5691	37.5057	35.7769	1788	110095201	LOC110095201	programmed cell death protein 4-like	GO:0005829,GO:0005634,GO:0043022,GO:0045892,GO:0006417,GO:0009646,GO:0090549	cytosol|nucleus|ribosome binding|negative regulation of transcription, DNA-templated|regulation of translation|response to absence of light|response to carbon starvation	-	-
XM_020820651.2	1016.03	1867.54	164.525	0.0880974	-3.50476	4.03551e-08	1.69082e-06	Down	57.0936	59.4346	58.9337	4.91997	6.38063	5.50632	1271	110095209	LOC110095209	GDSL esterase/lipase CPRD49	GO:0005576,GO:0016787,GO:0016042	extracellular region|hydrolase activity|lipid catabolic process	-	-
XM_020820656.2	34.6734	56.2664	13.0803	0.232471	-2.10488	0.0295722	0.1262	Down	1.48381	1.11793	0.937117	0.15965	0.231665	0.53486	1892	110095213	LOC110095213	protein trichome birefringence-like 19	GO:0005794,GO:0016021,GO:0016413	Golgi apparatus|integral component of membrane|O-acetyltransferase activity	-	-
XM_020820660.2	496.68	791.396	201.964	0.2552	-1.9703	0.00141409	0.0125094	Down	8.75069	8.73099	9.37331	2.80964	2.52496	2.11587	3519	110095217	LOC110095217	glutamate receptor 2.9	GO:0016021,GO:0005886,GO:0005262,GO:0008066,GO:0015276,GO:0006816,GO:0019722,GO:0071230	integral component of membrane|plasma membrane|calcium channel activity|glutamate receptor activity|ligand-gated ion channel activity|calcium ion transport|calcium-mediated signaling|cellular response to amino acid stimulus	-	-
XM_020820661.2	234.66	451.49	17.8293	0.0394899	-4.66237	3.16796e-10	2.21735e-08	Down	17.9165	17.6321	19.1889	0.602094	0.804236	0.933717	985	110095218	LOC110095218	beta-glucosidase-like SFR2, chloroplastic	GO:0009707,GO:0102996,GO:0008422,GO:0046480,GO:0005975	chloroplast outer membrane|beta,beta digalactosyldiacylglycerol galactosyltransferase activity|beta-glucosidase activity|galactolipid galactosyltransferase activity|carbohydrate metabolic process	-	-
XM_020820664.2	467.087	766.959	167.215	0.218024	-2.19744	0.000426799	0.00472002	Down	19.3194	17.2343	13.6204	5.41272	1.566	4.92826	1825	110095221	LOC110095221	cyclase-associated protein 1, transcript variant X2	GO:0030864,GO:0005829,GO:0003779,GO:0008179,GO:0030036,GO:0008154,GO:0000902,GO:0007163,GO:0009826	cortical actin cytoskeleton|cytosol|actin binding|adenylate cyclase binding|actin cytoskeleton organization|actin polymerization or depolymerization|cell morphogenesis|establishment or maintenance of cell polarity|unidimensional cell growth	-	-
XM_020820670.2	1298.31	664.935	1931.69	2.90508	1.53858	0.0088936	0.0520553	Up	19.9393	20.0105	20.5691	64.3365	63.7812	63.1562	1312	110095225	LOC110095225	zinc finger protein CONSTANS-LIKE 5	GO:0005634,GO:0003700,GO:0008270,GO:0009909,GO:0006355	nucleus|DNA-binding transcription factor activity|zinc ion binding|regulation of flower development|regulation of transcription, DNA-templated	-	-
XM_020820671.2	401.245	616.399	186.092	0.301901	-1.72785	0.00518878	0.0346884	Down	16.4824	16.219	16.3868	5.10398	4.82643	6.18328	1500	110095226	LOC110095226	probable pyridoxal 5'-phosphate synthase subunit PDX1.1	GO:0016843,GO:0036381,GO:0006520,GO:0042823,GO:0008615	amine-lyase activity|pyridoxal 5'-phosphate synthase (glutamine hydrolysing) activity|cellular amino acid metabolic process|pyridoxal phosphate biosynthetic process|pyridoxine biosynthetic process	path:dct00750	Vitamin B6 metabolism
XM_020820674.2	475.55	249.514	701.586	2.81181	1.4915	0.0146494	0.0751451	Up	9.44126	8.40213	8.89102	24.2391	28.8076	28.7386	1115	110095219	LOC110095219	activator of 90 kDa heat shock protein ATPase homolog 2, transcript variant X1	-	-	-	-
XM_020820676.2	367.729	735.144	0.314343	0.000427594	-11.1915	1.97143e-24	2.70327e-21	Down	10.5738	9.96116	9.96242	0.0111303	2.34675e-06	4.59354e-15	2879	110095230	LOC110095230	potassium transporter 5, transcript variant X2	GO:0016021,GO:0015079,GO:0006813	integral component of membrane|potassium ion transmembrane transporter activity|potassium ion transport	-	-
XM_020820683.2	452.431	260.738	644.124	2.47039	1.30474	0.0316081	0.13203	Up	5.70089	6.55115	7.76032	19.4443	16.5948	17.7249	1556	110095235	LOC110095235	RNA-binding protein 1, transcript variant X1	GO:0005829,GO:0005634,GO:1990904,GO:0005681,GO:0003729,GO:0003723,GO:0006397,GO:0051028,GO:1901000,GO:2000070,GO:0008380,GO:0010228	cytosol|nucleus|ribonucleoprotein complex|spliceosomal complex|mRNA binding|RNA binding|mRNA processing|mRNA transport|regulation of response to salt stress|regulation of response to water deprivation|RNA splicing|vegetative to reproductive phase transition of meristem	path:dct03015	mRNA surveillance pathway
XM_020820689.2	165.073	258.682	71.4642	0.276263	-1.85589	0.00625423	0.0399051	Down	5.4884	5.82415	6.33338	1.88541	2.09919	1.32196	1751	110095241	LOC110095241	squalene monooxygenase	GO:0005789,GO:0016021,GO:0050660,GO:0004506,GO:0009723,GO:0042542,GO:0009753,GO:0010038,GO:0002238,GO:0071731,GO:0009751,GO:1902438,GO:0016126,GO:0046246	endoplasmic reticulum membrane|integral component of membrane|flavin adenine dinucleotide binding|squalene monooxygenase activity|response to ethylene|response to hydrogen peroxide|response to jasmonic acid|response to metal ion|response to molecule of fungal origin|response to nitric oxide|response to salicylic acid|response to vanadate(3-)|sterol biosynthetic process|terpene biosynthetic process	path:dct00100,path:dct00909,path:dct01100,path:dct01110	Steroid biosynthesis|Sesquiterpenoid and triterpenoid biosynthesis|Metabolic pathways|Biosynthesis of secondary metabolites
XM_020820692.2	103.255	5.65367	200.857	35.5268	5.15084	2.15876e-09	1.21272e-07	Up	0.0248831	0.364706	6.03766e-08	5.06303	4.1726	5.72636	1746	110095243	LOC110095243	magnesium transporter MRS2-3, transcript variant X1	GO:0016021,GO:0005886,GO:0015095,GO:0015693	integral component of membrane|plasma membrane|magnesium ion transmembrane transporter activity|magnesium ion transport	-	-
XM_020820693.2	602.142	352.328	851.957	2.41808	1.27386	0.0333603	0.137483	Up	8.01357	8.1033	8.13721	21.8592	19.5156	22.3649	1737	110095243	LOC110095243	magnesium transporter MRS2-3, transcript variant X2	GO:0016021,GO:0005886,GO:0015095,GO:0015693	integral component of membrane|plasma membrane|magnesium ion transmembrane transporter activity|magnesium ion transport	-	-
XM_020820711.2	166.572	309.578	23.5664	0.0761242	-3.7155	4.41873e-07	1.38999e-05	Down	6.34015	7.35716	6.95873	0.530052	0.66743	0.512145	1792	110095258	LOC110095258	beta-hexosaminidase 3	GO:0005618,GO:0005634,GO:0005886,GO:0004563,GO:0015929,GO:0102148,GO:0005975	cell wall|nucleus|plasma membrane|beta-N-acetylhexosaminidase activity|hexosaminidase activity|N-acetyl-beta-D-galactosaminidase activity|carbohydrate metabolic process	path:dct00511,path:dct00513,path:dct00520,path:dct00531,path:dct00603,path:dct00604,path:dct01100	Other glycan degradation|Various types of N-glycan biosynthesis|Amino sugar and nucleotide sugar metabolism|Glycosaminoglycan degradation|Glycosphingolipid biosynthesis - globo and isoglobo series|Glycosphingolipid biosynthesis - ganglio series|Metabolic pathways
XM_020820717.2	451.076	685.425	216.727	0.316193	-1.66112	0.00670628	0.0420424	Down	18.2955	18.0711	18.3849	5.9546	5.94179	6.94755	1495	110095262	LOC110095262	mitochondrial dicarboxylate/tricarboxylate transporter DTC	GO:0005618,GO:0009941,GO:0016021,GO:0005743,GO:0005739,GO:0009506,GO:0009536,GO:0005774,GO:0005310,GO:0015367,GO:0015142,GO:0006835,GO:0035674	cell wall|chloroplast envelope|integral component of membrane|mitochondrial inner membrane|mitochondrion|plasmodesma|plastid|vacuolar membrane|dicarboxylic acid transmembrane transporter activity|oxoglutarate:malate antiporter activity|tricarboxylic acid transmembrane transporter activity|dicarboxylic acid transport|tricarboxylic acid transmembrane transport	-	-
XM_020820739.2	504.937	274.735	735.139	2.67581	1.41997	0.0194366	0.0931442	Up	3.49762	3.9003	5.63445	11.3442	13.8584	12.7349	2518	110095278	LOC110095278	casein kinase 1	GO:0005737,GO:0005634,GO:0005524,GO:0004674,GO:0009850,GO:0018105,GO:0040008,GO:0009741,GO:0009409,GO:0048364,GO:0009826	cytoplasm|nucleus|ATP binding|protein serine/threonine kinase activity|auxin metabolic process|peptidyl-serine phosphorylation|regulation of growth|response to brassinosteroid|response to cold|root development|unidimensional cell growth	-	-
XM_020820741.2	243.504	357.685	129.323	0.361556	-1.46771	0.0213911	0.0997073	Down	20.5803	21.2368	21.7928	6.96357	8.0362	10.0481	671	110095280	LOC110095280	cyclin-dependent kinases regulatory subunit 1, transcript variant X1	GO:0000307,GO:0005737,GO:0005777,GO:0019005,GO:0061575,GO:0042393,GO:0019901,GO:0043130,GO:0051301,GO:0042023,GO:0000278,GO:0051726,GO:0007346	cyclin-dependent protein kinase holoenzyme complex|cytoplasm|peroxisome|SCF ubiquitin ligase complex|cyclin-dependent protein serine/threonine kinase activator activity|histone binding|protein kinase binding|ubiquitin binding|cell division|DNA endoreduplication|mitotic cell cycle|regulation of cell cycle|regulation of mitotic cell cycle	-	-
XM_020820745.2	224.241	447.18	1.30245	0.00291259	-8.42348	1.2337e-18	5.81517e-16	Down	18.3887	16.9974	18.1831	0.0569446	0.0284514	0.0876647	997	110095283	LOC110095283	transcription factor GHD7-like	GO:0005634,GO:0003677,GO:0009908,GO:0048579,GO:0009909	nucleus|DNA binding|flower development|negative regulation of long-day photoperiodism, flowering|regulation of flower development	-	-
XM_020820752.2	34.6127	3.83804	65.3874	17.0367	4.09057	0.000150153	0.00202217	Up	0.0428398	0.202501	0.0061938	1.07054	1.78424	1.45797	1965	110095286	LOC110095286	DEAD-box ATP-dependent RNA helicase 41, transcript variant X3	GO:0005524,GO:0046872,GO:0003723,GO:0003724	ATP binding|metal ion binding|RNA binding|RNA helicase activity	-	-
XM_020820769.2	1527.21	2114.76	939.661	0.444334	-1.17028	0.0436994	0.167222	Down	62.3067	57.7434	58.8175	29.3056	29.4255	27.7036	1412	110095295	LOC110095295	probable membrane-associated 30 kDa protein, chloroplastic	GO:0009706,GO:0042644,GO:0009535,GO:0009508,GO:0010027,GO:0016050,GO:0016032	chloroplast inner membrane|chloroplast nucleoid|chloroplast thylakoid membrane|plastid chromosome|thylakoid membrane organization|vesicle organization|viral process	-	-
XM_020820771.2	14.6038	28.8854	0.322236	0.0111557	-6.48608	0.000624332	0.00648561	Down	0.60402	0.607398	0.603835	2.49826e-07	0.0316923	0.00742437	1922	110095296	LOC110095296	probable transcription factor PosF21, transcript variant X2	GO:0005737,GO:0005829,GO:0005634,GO:0003677,GO:0003700	cytoplasm|cytosol|nucleus|DNA binding|DNA-binding transcription factor activity	-	-
XM_020820781.2	32.7159	56.1975	9.23435	0.164319	-2.60543	0.0103993	0.0586497	Down	0.68402	0.327272	1.11616	0.18286	0.202215	8.70496e-06	3157	110095301	LOC110095301	protein HIRA, transcript variant X2	GO:0000775,GO:0000417,GO:0000790,GO:0003714,GO:0030702,GO:0006336,GO:0000070,GO:0031935,GO:0006351	chromosome, centromeric region|HIR complex|nuclear chromatin|transcription corepressor activity|chromatin silencing at centromere|DNA replication-independent nucleosome assembly|mitotic sister chromatid segregation|regulation of chromatin silencing|transcription, DNA-templated	-	-
XM_020820783.2	2127.75	3697.63	557.863	0.150871	-2.72862	7.12787e-06	0.0001537	Down	106.105	106.952	103.262	16.2659	17.9567	17.6823	1396	110095303	LOC110095303	probable fructokinase-1	GO:0005829,GO:0005524,GO:0019200,GO:0008865,GO:0006000,GO:0019252	cytosol|ATP binding|carbohydrate kinase activity|fructokinase activity|fructose metabolic process|starch biosynthetic process	path:dct00051,path:dct00500,path:dct00520,path:dct01100,path:dct01110	Fructose and mannose metabolism|Starch and sucrose metabolism|Amino sugar and nucleotide sugar metabolism|Metabolic pathways|Biosynthesis of secondary metabolites
XM_020820785.2	4523.54	1765.13	7281.95	4.12544	2.04455	0.00051373	0.00550344	Up	38.3149	36.9818	38.9024	165.97	175.637	170.927	1846	110095302	LOC110095302	pre-mRNA-splicing factor syf2, transcript variant X1	GO:0071013,GO:0071014,GO:0000974,GO:0006397,GO:0008380	catalytic step 2 spliceosome|post-mRNA release spliceosomal complex|Prp19 complex|mRNA processing|RNA splicing	path:dct03040	Spliceosome
XM_020820793.2	209.294	77.7232	340.865	4.38563	2.13278	0.00126713	0.0114825	Up	1.21348	1.97584	2.25894	10.7479	6.85784	8.3022	1707	110095302	LOC110095302	pre-mRNA-splicing factor syf2, transcript variant X2	GO:0071013,GO:0071014,GO:0000974,GO:0006397,GO:0008380	catalytic step 2 spliceosome|post-mRNA release spliceosomal complex|Prp19 complex|mRNA processing|RNA splicing	path:dct03040	Spliceosome
XM_020820802.2	177.621	11.5741	343.668	29.6928	4.89204	3.64327e-10	2.49788e-08	Up	0.624286	0.627044	0.998921	24.4189	23.0501	24.4841	621	110095312	LOC110095312	uncharacterized LOC110095312	-	-	-	-
XM_020820803.2	316.277	604.342	28.2117	0.0466817	-4.421	4.44915e-10	2.98653e-08	Down	7.57545	5.32529	7.93891	0.297878	0.32124	0.434794	3465	110095313	LOC110095313	alpha,alpha-trehalose-phosphate synthase [UDP-forming] 1, transcript variant X1	GO:0005618,GO:0005737,GO:0005829,GO:0005576,GO:0005773,GO:0003825,GO:0051301,GO:0016311,GO:0009793,GO:0009832,GO:0010182,GO:0005992,GO:0005991,GO:0070413	cell wall|cytoplasm|cytosol|extracellular region|vacuole|alpha,alpha-trehalose-phosphate synthase (UDP-forming) activity|cell division|dephosphorylation|embryo development ending in seed dormancy|plant-type cell wall biogenesis|sugar mediated signaling pathway|trehalose biosynthetic process|trehalose metabolic process|trehalose metabolism in response to stress	path:dct00500,path:dct01100,path:dct01110	Starch and sucrose metabolism|Metabolic pathways|Biosynthesis of secondary metabolites
XM_020820818.2	386.295	166.514	606.076	3.63979	1.86385	0.00278539	0.021278	Up	2.61903	2.65653	2.41373	9.8944	10.8536	9.71471	2584	110095317	LOC110095317	AP2-like ethylene-responsive transcription factor TOE3, transcript variant X1	GO:0005634,GO:0003677,GO:0003700,GO:0030154,GO:0009908,GO:0010073,GO:0048481,GO:0048316,GO:0010093	nucleus|DNA binding|DNA-binding transcription factor activity|cell differentiation|flower development|meristem maintenance|plant ovule development|seed development|specification of floral organ identity	-	-
XM_020820819.2	55.0515	3.24279	106.86	32.9532	5.04235	6.41669e-07	1.91656e-05	Up	1.94417e-07	0.000545819	0.252929	2.82633	2.67199	3.61172	1526	110095320	LOC110095320	G-box-binding factor 1-like, transcript variant X1	GO:0005737,GO:0005634,GO:0003700,GO:0043565,GO:0044212	cytoplasm|nucleus|DNA-binding transcription factor activity|sequence-specific DNA binding|transcription regulatory region DNA binding	-	-
XM_020820820.2	59.6787	12.9947	106.363	8.18508	3.033	0.000408439	0.00456009	Up	0.362474	0.678965	0.000844929	3.40379	2.94405	2.74967	1520	110095320	LOC110095320	G-box-binding factor 1-like, transcript variant X2	GO:0005634,GO:0003700,GO:0042802,GO:0043565,GO:0045893	nucleus|DNA-binding transcription factor activity|identical protein binding|sequence-specific DNA binding|positive regulation of transcription, DNA-templated	-	-
XM_020820821.2	508.502	257.26	759.745	2.95322	1.56229	0.0101637	0.0577633	Up	6.7931	6.643	7.7109	23.5777	25.1101	19.2022	1454	110095320	LOC110095320	G-box-binding factor 1-like, transcript variant X3	GO:0005737,GO:0005634,GO:0003700,GO:0043565,GO:0044212	cytoplasm|nucleus|DNA-binding transcription factor activity|sequence-specific DNA binding|transcription regulatory region DNA binding	-	-
XM_020820841.2	651.876	944.452	359.301	0.380433	-1.39428	0.019614	0.0937844	Down	14.0852	13.2598	14.58	5.76503	6.06777	5.5139	2690	110095334	LOC110095334	exocyst complex component EXO84C, transcript variant X1	GO:0000145,GO:0060321,GO:0006887,GO:0006893,GO:0008104	exocyst|acceptance of pollen|exocytosis|Golgi to plasma membrane transport|protein localization	-	-
XM_020820851.2	8.57335	0.355681	16.791	47.2081	5.56096	0.0143807	0.0741538	Up	0	0.0376874	0	0.63578	0.457153	0.631273	1262	110095344	LOC110095344	E3 ubiquitin-protein ligase PUB23-like	GO:0005829,GO:0004842,GO:0006952,GO:0051865,GO:0016567,GO:0002679,GO:0010200,GO:0009414	cytosol|ubiquitin-protein transferase activity|defense response|protein autoubiquitination|protein ubiquitination|respiratory burst involved in defense response|response to chitin|response to water deprivation	-	-
XM_020820859.2	15.7535	28.2948	3.21219	0.113526	-3.13891	0.0252461	0.112618	Down	2.23504	1.69406	0.283118	0.189914	0.204341	0.108705	807	110095352	LOC110095352	uncharacterized LOC110095352	GO:0005634,GO:0004190,GO:0003677,GO:0003887,GO:0004519,GO:0046872,GO:0003723,GO:0003964,GO:0015074,GO:0006310	nucleus|aspartic-type endopeptidase activity|DNA binding|DNA-directed DNA polymerase activity|endonuclease activity|metal ion binding|RNA binding|RNA-directed DNA polymerase activity|DNA integration|DNA recombination	-	-
XM_020820869.2	329.777	576.472	83.0826	0.144122	-2.79463	1.90655e-05	0.000359693	Down	5.63934	5.8112	6.01211	0.86613	0.913989	0.959053	3942	110095356	LOC110095356	DNA polymerase delta catalytic subunit	GO:0043625,GO:0008296,GO:0051539,GO:0003677,GO:0003887,GO:0046872,GO:0000166,GO:0006287,GO:0045004,GO:0006261,GO:0006297	delta DNA polymerase complex|3'-5'-exodeoxyribonuclease activity|4 iron, 4 sulfur cluster binding|DNA binding|DNA-directed DNA polymerase activity|metal ion binding|nucleotide binding|base-excision repair, gap-filling|DNA replication proofreading|DNA-dependent DNA replication|nucleotide-excision repair, DNA gap filling	path:dct03030,path:dct03410,path:dct03420,path:dct03430,path:dct03440	DNA replication|Base excision repair|Nucleotide excision repair|Mismatch repair|Homologous recombination
XM_020820876.2	2384.02	1366.68	3401.37	2.48878	1.31544	0.0228164	0.104541	Up	25.0712	28.1205	27.6938	72.871	72.9802	73.1531	2018	110095360	LOC110095360	pentatricopeptide repeat-containing protein At3g02650, mitochondrial	-	-	-	-
XM_020820879.2	362.106	668.613	55.5981	0.0831544	-3.58806	1.00743e-07	3.80366e-06	Down	31.2821	32.6326	31.6861	2.8073	2.74131	3.07682	835	110095364	LOC110095364	cucumber peeling cupredoxin	GO:0009055,GO:0046872	electron transfer activity|metal ion binding	-	-
XM_020820883.2	150.024	277.44	22.6081	0.0814882	-3.61727	1.07056e-06	3.03245e-05	Down	3.51037	3.0924	3.57076	0.329483	0.251033	0.320697	3257	110095367	LOC110095367	protein SMAX1-LIKE 4	GO:0005634,GO:0016787,GO:0033500,GO:0042631,GO:0010233,GO:0019538,GO:0009651	nucleus|hydrolase activity|carbohydrate homeostasis|cellular response to water deprivation|phloem transport|protein metabolic process|response to salt stress	-	-
XM_020820884.2	1878.81	2658.13	1099.5	0.413636	-1.27357	0.0277741	0.120538	Down	108.564	91.7746	100.022	48.6131	43.2294	43.2768	1057	110095369	LOC110095369	60S ribosomal protein L7-2, transcript variant X1	GO:0005829,GO:0022625,GO:0022626,GO:0042788,GO:0003729,GO:0003735,GO:0000463	cytosol|cytosolic large ribosomal subunit|cytosolic ribosome|polysomal ribosome|mRNA binding|structural constituent of ribosome|maturation of LSU-rRNA from tricistronic rRNA transcript (SSU-rRNA, 5.8S rRNA, LSU-rRNA)	path:dct03010	Ribosome
XM_020820889.2	31.6566	54.1787	9.13455	0.1686	-2.56832	0.0133769	0.0704873	Down	1.79774	1.04396	0.429046	0.572792	0.000210278	0.0176714	1976	110095371	LOC110095371	uncharacterized LOC110095371, transcript variant X2	-	-	path:dct03013	RNA transport
XM_020820904.2	14569.8	23497.3	5642.34	0.240127	-2.05813	0.00043891	0.00484117	Down	313.276	310.287	309.639	79.5642	81.7361	82.5042	3007	110095381	LOC110095381	linoleate 13S-lipoxygenase 2-1, chloroplastic	GO:0009570,GO:0009534,GO:0016165,GO:0046872,GO:0010597,GO:0031408	chloroplast stroma|chloroplast thylakoid|linoleate 13S-lipoxygenase activity|metal ion binding|green leaf volatile biosynthetic process|oxylipin biosynthetic process	path:dct00591,path:dct00592,path:dct01100,path:dct01110	Linoleic acid metabolism|alpha-Linolenic acid metabolism|Metabolic pathways|Biosynthesis of secondary metabolites
XM_020820911.2	164.713	281.171	48.2555	0.171623	-2.54269	0.000258377	0.00316205	Down	4.40675	3.83	4.11261	0.938587	0.743523	0.623392	2721	110095385	LOC110095385	AP2-associated protein kinase 1	GO:0030479,GO:0005737,GO:0005524,GO:0004674,GO:0000147,GO:0007015,GO:0006468,GO:0007165	actin cortical patch|cytoplasm|ATP binding|protein serine/threonine kinase activity|actin cortical patch assembly|actin filament organization|protein phosphorylation|signal transduction	-	-
XM_020820918.2	110.637	173.753	47.5215	0.273501	-1.87038	0.00944995	0.0546962	Down	0.895101	0.892014	0.823788	0.219085	0.306674	0.250247	7940	110095391	LOC110095391	uncharacterized LOC110095391	GO:0005576,GO:0016021,GO:0005886,GO:0005524,GO:0004674,GO:0019199,GO:0006468	extracellular region|integral component of membrane|plasma membrane|ATP binding|protein serine/threonine kinase activity|transmembrane receptor protein kinase activity|protein phosphorylation	-	-
XM_020820920.2	33.2397	10.0958	56.3836	5.58485	2.48152	0.0131118	0.0694302	Up	0.0880917	0.180031	0.132857	0.595666	1.42731	0.451238	2959	110095392	LOC110095392	anaphase-promoting complex subunit 4, transcript variant X2	GO:0005680,GO:0034399,GO:0005634,GO:0031145,GO:0007049,GO:0051301,GO:0009793,GO:0048481,GO:0045842,GO:0070979	anaphase-promoting complex|nuclear periphery|nucleus|anaphase-promoting complex-dependent catabolic process|cell cycle|cell division|embryo development ending in seed dormancy|plant ovule development|positive regulation of mitotic metaphase/anaphase transition|protein K11-linked ubiquitination	path:dct04120	Ubiquitin mediated proteolysis
XM_020820925.2	290.32	170.537	410.103	2.40477	1.2659	0.0448555	0.170358	Up	1.91084	1.76099	2.16831	4.24171	4.84339	6.20675	3486	110095393	LOC110095393	uncharacterized LOC110095393, transcript variant X1	GO:0005829,GO:0005769,GO:0005783,GO:0005768,GO:0005634,GO:0005886,GO:0005802,GO:0012510,GO:0005524,GO:0016301,GO:0004709,GO:0004712,GO:0009738,GO:0008219,GO:0002229,GO:0009873,GO:0000165,GO:0009788,GO:0046777,GO:1900424,GO:1900150,GO:2000031,GO:0009617,GO:0009723,GO:0009620,GO:0009414	cytosol|early endosome|endoplasmic reticulum|endosome|nucleus|plasma membrane|trans-Golgi network|trans-Golgi network transport vesicle membrane|ATP binding|kinase activity|MAP kinase kinase kinase activity|protein serine/threonine/tyrosine kinase activity|abscisic acid-activated signaling pathway|cell death|defense response to oomycetes|ethylene-activated signaling pathway|MAPK cascade|negative …	-	-
XM_020820926.2	122.8	200.625	44.9757	0.224178	-2.15728	0.00252078	0.0197057	Down	2.366	2.14602	2.10035	0.486845	0.540162	0.589172	3622	110095394	LOC110095394	glutamate receptor 2.8	GO:0016021,GO:0005886,GO:0005773,GO:0005262,GO:0008066,GO:0015276,GO:0006816,GO:0019722,GO:0071230	integral component of membrane|plasma membrane|vacuole|calcium channel activity|glutamate receptor activity|ligand-gated ion channel activity|calcium ion transport|calcium-mediated signaling|cellular response to amino acid stimulus	-	-
XM_020820929.2	135.259	56.17	214.348	3.81606	1.93209	0.00586284	0.0380174	Up	1.11721	0.841316	0.903247	3.63431	4.74831	3.52603	2337	110095397	LOC110095397	calmodulin-binding protein 60 B-like, transcript variant X1	GO:0005634,GO:0005516,GO:0003700,GO:0043565,GO:0080142	nucleus|calmodulin binding|DNA-binding transcription factor activity|sequence-specific DNA binding|regulation of salicylic acid biosynthetic process	-	-
XM_020820932.2	1667.67	912.957	2422.39	2.65334	1.40781	0.0158297	0.0796155	Up	39.0889	39.4243	40.6806	114.884	111.099	118.041	915	110095400	LOC110095400	ubiquitin-fold modifier-conjugating enzyme 1	GO:0071568,GO:1990592	UFM1 transferase activity|protein K69-linked ufmylation	-	-
XM_020820933.2	903.002	1287.85	518.151	0.402337	-1.31352	0.0260324	0.115048	Down	23.455	21.8664	21.3988	10.1623	9.92567	9.10288	2305	110095398	LOC110095398	protein RETICULATA-RELATED 1, chloroplastic	GO:0009507,GO:0031969,GO:0016021,GO:0007275	chloroplast|chloroplast membrane|integral component of membrane|multicellular organism development	-	-
XM_020820940.2	422.899	32.478	813.321	25.0422	4.64629	4.27619e-11	3.68571e-09	Up	1.15893	1.14575	1.46713	34.4017	34.3481	34.7354	1021	110095407	LOC110095407	DNA repair RAD52-like protein 1, mitochondrial	GO:0005739,GO:0005634,GO:0050897,GO:0003690,GO:0003697,GO:0006281,GO:0000724,GO:0000373	mitochondrion|nucleus|cobalt ion binding|double-stranded DNA binding|single-stranded DNA binding|DNA repair|double-strand break repair via homologous recombination|Group II intron splicing	-	-
XM_020820947.2	131.611	26.1655	237.057	9.05992	3.1795	1.82637e-05	0.00034739	Up	0.871964	0.754346	0.759667	7.8698	7.90238	7.86633	1303	110095412	LOC110095412	NAC domain-containing protein 73	GO:0005634,GO:0003700,GO:0043565,GO:0044212,GO:0045893,GO:2000652	nucleus|DNA-binding transcription factor activity|sequence-specific DNA binding|transcription regulatory region DNA binding|positive regulation of transcription, DNA-templated|regulation of secondary cell wall biogenesis	-	-
XM_020820950.2	64.3604	126.127	2.5942	0.0205682	-5.60344	2.32133e-08	1.0238e-06	Down	5.22397	5.60804	4.88464	0.0709169	0.12872	0.154719	958	110095415	LOC110095415	fasciclin-like arabinogalactan protein 9	GO:0031225,GO:0046658,GO:0005576,GO:0005886,GO:0099503,GO:0009834	anchored component of membrane|anchored component of plasma membrane|extracellular region|plasma membrane|secretory vesicle|plant-type secondary cell wall biogenesis	-	-
XM_020820955.2	7.20067	0	14.4013	Inf	Inf	0.0112753	0.0621834	Up	8.22244e-28	3.8189e-28	2.57448e-27	1.38793	1.79402	0.365836	532	110095419	LOC110095419	late embryogenesis abundant protein Lea5-like	-	-	-	-
XM_020820963.2	75.7026	27.3873	124.018	4.5283	2.17897	0.00550964	0.0363617	Up	1.62487	2.19805	1.79283	9.12404	9.58374	9.18511	578	110095424	LOC110095424	late embryogenesis abundant protein Lea5-like	-	-	-	-
XM_020820964.2	10.7311	0	21.4623	Inf	Inf	0.00145701	0.0128144	Up	1.04368e-07	5.38763e-21	1.1208e-21	1.11798	1.48272	2.27582	568	110095425	LOC110095425	late embryogenesis abundant protein Lea5-like	-	-	-	-
XM_020820969.2	45.0506	1.96542	88.1357	44.8431	5.48681	7.67608e-07	2.25916e-05	Up	0.07813	0.042693	0.0972103	3.86894	3.65002	3.69722	1022	110095428	LOC110095428	protein DELAY OF GERMINATION 1	GO:0043565,GO:0006351	sequence-specific DNA binding|transcription, DNA-templated	-	-
XM_020820977.2	153.917	48.92	258.915	5.29262	2.40398	0.000561913	0.00593531	Up	0.511557	0.616369	0.641485	3.9063	3.0468	3.27471	3289	110095435	LOC110095435	uncharacterized LOC110095435, transcript variant X1	-	-	-	-
XM_020820993.2	910.353	1259.82	560.887	0.445213	-1.16743	0.0468397	0.175486	Down	20.9489	20.5878	19.7584	9.29591	10.1054	10.2948	2455	110095452	LOC110095452	DEAD-box ATP-dependent RNA helicase 52B	GO:0005829,GO:0005634,GO:0043186,GO:0005777,GO:0005524,GO:0003723,GO:0003724	cytosol|nucleus|P granule|peroxisome|ATP binding|RNA binding|RNA helicase activity	-	-
XM_020820998.2	280.745	401.047	160.442	0.400058	-1.32172	0.0359724	0.145388	Down	10.5339	12.0127	10.249	4.60581	4.3641	5.32931	1461	110095454	LOC110095454	probable homogentisate phytyltransferase 2, chloroplastic	GO:0009535,GO:0016021,GO:0016765,GO:0010189	chloroplast thylakoid membrane|integral component of membrane|transferase activity, transferring alkyl or aryl (other than methyl) groups|vitamin E biosynthetic process	path:dct00130	Ubiquinone and other terpenoid-quinone biosynthesis
XM_020820999.2	1072.76	1483.01	662.505	0.44673	-1.16252	0.0471405	0.176394	Down	27.6787	27.7099	26.6429	13.8995	12.6454	13.327	2159	110095455	LOC110095455	zeta-carotene desaturase, chloroplastic/chromoplastic	GO:0009507,GO:0009509,GO:0052887,GO:0052886,GO:0016719,GO:0016117	chloroplast|chromoplast|7,9,9'-tricis-neurosporene:quinone oxidoreductase activity|9,9'-dicis-carotene:quinone oxidoreductase activity|carotene 7,8-desaturase activity|carotenoid biosynthetic process	path:dct00906,path:dct01100,path:dct01110	Carotenoid biosynthesis|Metabolic pathways|Biosynthesis of secondary metabolites
XM_020821001.2	40.7363	17.7737	63.6989	3.5839	1.84153	0.0466627	0.175106	Up	0.485693	0.282122	0.313791	1.5731	1.03923	1.68483	1925	110095456	LOC110095456	D-lactate dehydrogenase [cytochrome], mitochondrial, transcript variant X2	GO:0005739,GO:0005886,GO:0005524,GO:0004458,GO:0008720,GO:0071949,GO:0050660,GO:0019154,GO:0008891,GO:0042802,GO:1903457,GO:0051596	mitochondrion|plasma membrane|ATP binding|D-lactate dehydrogenase (cytochrome) activity|D-lactate dehydrogenase activity|FAD binding|flavin adenine dinucleotide binding|glycolate dehydrogenase activity|glycolate oxidase activity|identical protein binding|lactate catabolic process|methylglyoxal catabolic process	path:dct00620,path:dct01100	Pyruvate metabolism|Metabolic pathways
XM_020821007.2	15.7956	0	31.5912	Inf	Inf	9.67845e-05	0.00140776	Up	4.68815e-13	5.87098e-06	0.000507628	0.33664	0.542257	0.839936	2367	110095461	LOC110095461	splicing factor U2AF-associated protein 2, transcript variant X1	GO:0005686,GO:0005684,GO:0003723,GO:0045292	U2 snRNP|U2-type spliceosomal complex|RNA binding|mRNA cis splicing, via spliceosome	-	-
XM_020821009.2	15.5478	0	31.0955	Inf	Inf	0.00010494	0.00150678	Up	4.25262e-13	3.15005e-06	0.000111818	0.586585	0.941532	0.184222	2358	110095461	LOC110095461	splicing factor U2AF-associated protein 2, transcript variant X3	GO:0005686,GO:0005684,GO:0003723,GO:0045292	U2 snRNP|U2-type spliceosomal complex|RNA binding|mRNA cis splicing, via spliceosome	-	-
XM_020821021.2	38.348	10.756	65.94	6.13052	2.61601	0.00658032	0.0414423	Up	0.145214	0.39871	0.405317	1.93012	2.18857	2.10385	1375	110095470	LOC110095470	uncharacterized LOC110095470	-	-	-	-
XM_020821022.2	163.265	318.483	8.04679	0.025266	-5.30666	5.38074e-11	4.5468e-09	Down	9.80643	9.43382	9.79653	0.372192	0.161299	0.280854	1309	110095471	LOC110095471	uncharacterized LOC110095471	-	-	-	-
XM_020821033.2	701.039	997.399	404.68	0.405735	-1.30139	0.0288362	0.123918	Down	42.135	45.2107	43.5263	18.7585	18.7638	20.2718	910	110095481	LOC110095481	actin-depolymerizing factor 11	GO:0015629,GO:0003779,GO:0030042	actin cytoskeleton|actin binding|actin filament depolymerization	-	-
XM_020821072.2	127.471	213.823	41.1191	0.192304	-2.37854	0.000925805	0.00890869	Down	2.47408	1.38688	2.24123	0.59268	0.648046	0.0307185	4181	110095504	LOC110095504	uncharacterized LOC110095504, transcript variant X2	-	-	-	-
XM_020821080.2	172.211	59.6155	284.806	4.77738	2.25622	0.00094557	0.00906419	Up	1.1354	1.40811	1.39304	7.25373	6.18152	7.04449	1807	110095508	LOC110095508	EID1-like F-box protein 2, transcript variant X2	-	-	-	-
XM_020821085.2	20.2207	40.1192	0.322236	0.00803197	-6.96003	5.28809e-05	0.000837913	Down	0.154416	1.93335	0.614329	0.00702869	0.0205299	2.07575e-11	1785	110095508	LOC110095508	EID1-like F-box protein 2, transcript variant X7	-	-	-	-
XM_020821088.2	163.433	250.891	75.9748	0.30282	-1.72347	0.0106724	0.0596656	Down	4.8034	5.15513	5.26628	1.76545	1.36252	1.89239	1970	110095510	LOC110095510	uncharacterized protein YtfP, transcript variant X8	-	-	-	-
XM_020821104.2	48.8122	87.9636	9.66077	0.109827	-3.1867	0.000576825	0.00607005	Down	5.21538	4.87918	4.44431	0.749163	0.437609	0.530599	720	110095521	LOC110095521	lamin-like protein	GO:0031225,GO:0046658,GO:0005886,GO:0009536,GO:0005773,GO:0009055	anchored component of membrane|anchored component of plasma membrane|plasma membrane|plastid|vacuole|electron transfer activity	-	-
XM_020821105.2	616.773	324.367	909.179	2.80293	1.48694	0.0131621	0.0696353	Up	7.44498	8.78294	8.12603	24.6793	24.0711	25.5346	1590	110095522	LOC110095522	formamidase-like	GO:0005829,GO:0005634,GO:0004328	cytosol|nucleus|formamidase activity	path:dct00460,path:dct00630,path:dct00910,path:dct01100,path:dct01200	Cyanoamino acid metabolism|Glyoxylate and dicarboxylate metabolism|Nitrogen metabolism|Metabolic pathways|Carbon metabolism
XM_020821106.2	15.3557	2.58258	28.1288	10.8917	3.44516	0.0181534	0.0884137	Up	0.0741946	1.58949e-18	0.273936	2.17885	1.40335e-12	2.15828	837	110095343	LOC110095343	uncharacterized LOC110095343, transcript variant X3	-	-	-	-
XM_020821111.2	16.9733	32.314	1.63258	0.0505223	-4.30694	0.00321158	0.0239042	Down	2.03508	1.62845	0.329877	4.52021e-18	0.143134	0.0724374	977	110095527	LOC110095527	uncharacterized LOC110095527, transcript variant X1	-	-	-	-
XM_020821112.2	146.262	240.363	52.1605	0.217008	-2.20418	0.00153365	0.0133754	Down	10.7277	7.97818	12.0714	3.02517	2.0478	2.17413	932	110095527	LOC110095527	uncharacterized LOC110095527, transcript variant X2	-	-	-	-
XM_020821115.2	316.614	580.116	53.1127	0.0915553	-3.44921	3.32236e-07	1.06762e-05	Down	11.4376	11.8588	11.6202	1.00677	1.13851	1.32775	1983	110095528	LOC110095528	heparanase-like protein 2	GO:0005618,GO:0005576,GO:0005765,GO:0009505,GO:0005886,GO:0004566,GO:0009826	cell wall|extracellular region|lysosomal membrane|plant-type cell wall|plasma membrane|beta-glucuronidase activity|unidimensional cell growth	path:dct00531,path:dct01100	Glycosaminoglycan degradation|Metabolic pathways
XM_020821124.2	136.102	213.112	59.0913	0.277279	-1.85059	0.00791387	0.0477585	Down	10.4339	11.6931	12.0338	4.03636	2.38591	3.83397	746	110095535	LOC110095535	c-Myc-binding protein homolog	-	-	-	-
XM_020821149.2	1705.39	740.197	2670.58	3.60793	1.85117	0.00172842	0.0147209	Up	32.3734	33.4588	38.78	138.083	138.271	134.259	845	110095556	LOC110095556	calmodulin-binding transcription activator CBT, transcript variant X1	GO:0005634,GO:0005516,GO:0043565,GO:0045944,GO:0045893	nucleus|calmodulin binding|sequence-specific DNA binding|positive regulation of transcription by RNA polymerase II|positive regulation of transcription, DNA-templated	-	-
XM_020821156.2	11.883	23.7659	0	0	#NAME?	0.000742407	0.00747037	Down	0.137825	0.521997	0.300944	7.03354e-05	0.00149448	0.00188302	2952	110095560	LOC110095560	uncharacterized LOC110095560, transcript variant X5	-	-	-	-
XM_020821163.2	580.182	883.953	276.411	0.312699	-1.67716	0.00570257	0.0372519	Down	22.628	24.2648	23.5809	8.06611	8.00597	7.92045	1498	110095566	LOC110095566	2-alkenal reductase (NADP(+)-dependent)	GO:0016491	oxidoreductase activity	-	-
XM_020821173.2	83.9104	33.1315	134.689	4.06529	2.02336	0.00799158	0.0481105	Up	0.412987	0.748159	0.710036	2.71485	2.24552	3.35907	2105	110095575	LOC110095575	plastidial pyruvate kinase 1, chloroplastic-like, transcript variant X1	GO:0009507,GO:0005524,GO:0016301,GO:0000287,GO:0030955,GO:0004743	chloroplast|ATP binding|kinase activity|magnesium ion binding|potassium ion binding|pyruvate kinase activity	path:dct00010,path:dct00230,path:dct00620,path:dct01100,path:dct01110,path:dct01200,path:dct01230	Glycolysis / Gluconeogenesis|Purine metabolism|Pyruvate metabolism|Metabolic pathways|Biosynthesis of secondary metabolites|Carbon metabolism|Biosynthesis of amino acids
XM_020821183.2	453.008	669.558	236.457	0.353154	-1.50163	0.01298	0.0688959	Down	18.447	13.2304	11.5165	4.6042	3.60456	8.41883	1852	110095583	LOC110095583	ribosome biogenesis protein WDR12 homolog, transcript variant X2	GO:0005654,GO:0070545,GO:0009506,GO:0030687,GO:0043021,GO:0000466,GO:0000463	nucleoplasm|PeBoW complex|plasmodesma|preribosome, large subunit precursor|ribonucleoprotein complex binding|maturation of 5.8S rRNA from tricistronic rRNA transcript (SSU-rRNA, 5.8S rRNA, LSU-rRNA)|maturation of LSU-rRNA from tricistronic rRNA transcript (SSU-rRNA, 5.8S rRNA, LSU-rRNA)	-	-
XM_020821186.2	1381.65	1946.67	816.631	0.419501	-1.25325	0.0310804	0.130513	Down	52.7739	50.184	55.8386	22.7686	24.4242	25.2689	1464	110095584	LOC110095584	60S ribosomal protein L4-1	GO:0005618,GO:0005829,GO:0022625,GO:0022626,GO:0005730,GO:0005886,GO:0009506,GO:0042788,GO:0005773,GO:0003729,GO:0003735,GO:0006412	cell wall|cytosol|cytosolic large ribosomal subunit|cytosolic ribosome|nucleolus|plasma membrane|plasmodesma|polysomal ribosome|vacuole|mRNA binding|structural constituent of ribosome|translation	path:dct03010	Ribosome
XM_020821190.2	17.8522	5.13515	30.5693	5.95295	2.5736	0.0419732	0.16218	Up	0.0890224	0.44465	0.178606	1.80323	1.63184	1.21655	858	110095589	LOC110095589	uncharacterized LOC110095589	GO:0009507,GO:0005829,GO:0005634,GO:0005886,GO:0009536,GO:0005524,GO:0002238	chloroplast|cytosol|nucleus|plasma membrane|plastid|ATP binding|response to molecule of fungal origin	-	-
XM_020821198.2	54.8752	23.7178	86.0326	3.62734	1.85891	0.0276567	0.120236	Up	0.165378	0.218539	0.656384	2.06821	0.869172	1.1437	2729	110095593	LOC110095593	probable tRNA (guanine(26)-N(2))-dimethyltransferase 1, transcript variant X1	GO:0004809,GO:0000049	tRNA (guanine-N2-)-methyltransferase activity|tRNA binding	-	-
XM_020821199.2	142.36	218.397	66.3222	0.303677	-1.71939	0.0115822	0.0633889	Down	4.95552	5.609	5.02116	0	2.1866	2.96925	1675	110095593	LOC110095593	probable tRNA (guanine(26)-N(2))-dimethyltransferase 1, transcript variant X2	GO:0004809,GO:0000049	tRNA (guanine-N2-)-methyltransferase activity|tRNA binding	-	-
XM_020821204.2	80.7164	35.7361	125.697	3.51736	1.81449	0.0172063	0.0847727	Up	0.414053	0.567137	0.48266	2.04808	1.92882	1.64575	2908	110095597	LOC110095597	neutral ceramidase 2	GO:0005783,GO:0005576,GO:0005794,GO:0102121,GO:0017040,GO:0046514,GO:0042759,GO:0046512	endoplasmic reticulum|extracellular region|Golgi apparatus|ceramidase activity|N-acylsphingosine amidohydrolase activity|ceramide catabolic process|long-chain fatty acid biosynthetic process|sphingosine biosynthetic process	path:dct00600,path:dct01100	Sphingolipid metabolism|Metabolic pathways
XM_020821233.2	116.746	50.9849	182.506	3.57961	1.8398	0.0104809	0.0589665	Up	1.0322	0.702638	1.31472	3.13771	5.34746	3.35499	2002	110095613	LOC110095613	WRKY transcription factor WRKY24, transcript variant X1	GO:0005634,GO:0003700,GO:0043565,GO:0009738,GO:0009740,GO:0009788,GO:0009938,GO:0045893,GO:0009737,GO:0009753	nucleus|DNA-binding transcription factor activity|sequence-specific DNA binding|abscisic acid-activated signaling pathway|gibberellic acid mediated signaling pathway|negative regulation of abscisic acid-activated signaling pathway|negative regulation of gibberellic acid mediated signaling pathway|positive regulation of transcription, DNA-templated|response to abscisic acid|response to jasmonic ac…	path:dct04016,path:dct04626	MAPK signaling pathway - plant|Plant-pathogen interaction
XM_020821238.2	61.0469	103.673	18.4208	0.177682	-2.49263	0.00296652	0.0224176	Down	2.46236	2.22096	2.48456	0.457472	0.450864	0.483975	1725	110095619	LOC110095619	serine/threonine-protein kinase WAG1	GO:0005737,GO:0005829,GO:0005634,GO:0005886,GO:0005524,GO:0016301,GO:0004674,GO:0009926,GO:0009734,GO:0048825,GO:0006468,GO:0040008	cytoplasm|cytosol|nucleus|plasma membrane|ATP binding|kinase activity|protein serine/threonine kinase activity|auxin polar transport|auxin-activated signaling pathway|cotyledon development|protein phosphorylation|regulation of growth	-	-
XM_020821245.2	3118.95	748.004	5489.9	7.33941	2.87566	2.3204e-06	5.92713e-05	Up	13.5471	14.4452	13.8609	111.707	110.753	111.617	2135	110095627	LOC110095627	inositol transporter 1	GO:0005829,GO:0016021,GO:0009705,GO:0005773,GO:0005366,GO:0015798	cytosol|integral component of membrane|plant-type vacuole membrane|vacuole|myo-inositol:proton symporter activity|myo-inositol transport	-	-
XM_020821252.2	83.936	160.771	7.10095	0.0441681	-4.50085	2.34035e-07	7.94166e-06	Down	3.8669	3.91481	3.76899	0.189323	0.182391	0.178412	1664	110095634	LOC110095634	cytochrome P450 76C2-like	GO:0016021,GO:0020037,GO:0005506,GO:0016709	integral component of membrane|heme binding|iron ion binding|oxidoreductase activity, acting on paired donors, with incorporation or reduction of molecular oxygen, NAD(P)H as one donor, and incorporation of one atom of oxygen	-	-
XM_020821253.2	379.811	229.204	530.418	2.31418	1.2105	0.0481217	0.178912	Up	5.39213	5.57634	5.57907	14.4413	13.4229	13.7537	1655	110095635	LOC110095635	30S ribosomal protein S9, mitochondrial	GO:0005829,GO:0005763,GO:0005739,GO:0003723,GO:0003735,GO:0009559,GO:0048229,GO:0009555,GO:0006412	cytosol|mitochondrial small ribosomal subunit|mitochondrion|RNA binding|structural constituent of ribosome|embryo sac central cell differentiation|gametophyte development|pollen development|translation	path:dct03010	Ribosome
XM_020821257.2	19.5232	36.46	2.58631	0.0709355	-3.81735	0.00409597	0.028749	Down	0.649609	0.625663	0.729128	0.054405	0.0397427	0.0667002	2153	110095638	LOC110095638	7-ethoxycoumarin O-deethylase-like	GO:0016021,GO:0020037,GO:0005506,GO:0016709,GO:0010333,GO:0080027,GO:0016114	integral component of membrane|heme binding|iron ion binding|oxidoreductase activity, acting on paired donors, with incorporation or reduction of molecular oxygen, NAD(P)H as one donor, and incorporation of one atom of oxygen|terpene synthase activity|response to herbivore|terpenoid biosynthetic process	-	-
XM_020821259.2	15.5509	0.636907	30.465	47.8327	5.57992	0.00102185	0.0096543	Up	0.0929187	2.42097e-10	2.66898e-17	2.98475	0.903499	0.336364	944	110095640	LOC110095640	uncharacterized LOC110095640, transcript variant X1	-	-	-	-
XM_020821267.2	502.015	858.91	145.12	0.168959	-2.56526	4.57946e-05	0.000748366	Down	13.5099	12.7976	14.2491	2.32418	2.62065	2.51756	2530	110095646	LOC110095646	cytochrome P450 86A8	GO:0016021,GO:0020037,GO:0005506,GO:0016709,GO:0035336	integral component of membrane|heme binding|iron ion binding|oxidoreductase activity, acting on paired donors, with incorporation or reduction of molecular oxygen, NAD(P)H as one donor, and incorporation of one atom of oxygen|long-chain fatty-acyl-CoA metabolic process	path:dct00073,path:dct01100	Cutin, suberine and wax biosynthesis|Metabolic pathways
XM_020821268.2	72.4644	119.082	25.8468	0.21705	-2.2039	0.00566884	0.03712	Down	1.78721	2.07547	2.11645	0.484285	0.443854	0.495848	2379	110095648	LOC110095648	probable inactive receptor kinase At5g67200	-	-	-	-
XM_020821272.2	95.332	155.433	35.2309	0.226663	-2.14138	0.00406513	0.0285791	Down	2.35421	1.78211	2.48954	0.609744	0.383659	0.634885	2804	110095651	LOC110095651	receptor-like protein 6	GO:0016021,GO:0005886	integral component of membrane|plasma membrane	-	-
XM_020821276.2	136.431	69.8661	202.995	2.90549	1.53878	0.0303595	0.128343	Up	4.75178	0.768416	2.32977	6.01916	6.6496	12.0417	1068	110095655	LOC110095655	nuclear pore complex protein NUP62-like	GO:0005829,GO:0005635,GO:0034399,GO:0044613,GO:0005543,GO:0017056,GO:0051028,GO:0010930,GO:0006606	cytosol|nuclear envelope|nuclear periphery|nuclear pore central transport channel|phospholipid binding|structural constituent of nuclear pore|mRNA transport|negative regulation of auxin mediated signaling pathway|protein import into nucleus	-	-
XM_020821278.2	761.979	456.482	1067.48	2.33848	1.22557	0.038868	0.153502	Up	6.59566	8.02343	8.56424	14.6432	21.9114	22.4525	2351	110095657	LOC110095657	probable LRR receptor-like serine/threonine-protein kinase At1g63430, transcript variant X1	GO:0016021,GO:0005886,GO:0005524,GO:0004674	integral component of membrane|plasma membrane|ATP binding|protein serine/threonine kinase activity	-	-
XM_020821282.2	57.5932	91.9558	23.2305	0.252627	-1.98492	0.018937	0.0914034	Down	0.260925	0.941079	1.73025	0.570099	0.10757	0.127697	3737	110095659	LOC110095659	MMS19 nucleotide excision repair protein homolog, transcript variant X1	GO:0097361,GO:0005634,GO:0007059,GO:0006281,GO:0016226,GO:1905168,GO:0045893,GO:0097428	CIA complex|nucleus|chromosome segregation|DNA repair|iron-sulfur cluster assembly|positive regulation of double-strand break repair via homologous recombination|positive regulation of transcription, DNA-templated|protein maturation by iron-sulfur cluster transfer	-	-
XM_020821293.2	1758.42	454.221	3062.61	6.74255	2.75329	6.75168e-06	0.000147117	Up	5.67883	7.29088	11.6834	57.7275	49.8335	73.4451	2199	110095662	LOC110095662	NADP-dependent malic enzyme, transcript variant X1	GO:0005737,GO:0004471,GO:0004473,GO:0046872,GO:0051287,GO:0008948,GO:0006108,GO:0051260	cytoplasm|malate dehydrogenase (decarboxylating) (NAD+) activity|malate dehydrogenase (decarboxylating) (NADP+) activity|metal ion binding|NAD binding|oxaloacetate decarboxylase activity|malate metabolic process|protein homooligomerization	path:dct00620,path:dct00710,path:dct01100,path:dct01200	Pyruvate metabolism|Carbon fixation in photosynthetic organisms|Metabolic pathways|Carbon metabolism
XM_020821300.2	17.8343	4.66779	31.0008	6.64143	2.73149	0.0349167	0.142285	Up	0.109726	0.120384	0.0814184	0.766319	0.652643	0.762729	1834	110095669	LOC110095669	cationic amino acid transporter 6, chloroplastic	GO:0031969,GO:0016021,GO:0022857,GO:0006865	chloroplast membrane|integral component of membrane|transmembrane transporter activity|amino acid transport	-	-
XM_020821301.2	387.633	562.407	212.859	0.378479	-1.40172	0.0222636	0.102695	Down	15.7101	14.1433	13.6651	5.56239	5.79368	6.55063	1543	110095670	LOC110095670	B3 domain-containing protein At2g36080	GO:0005634,GO:0003677,GO:0003700,GO:0048366,GO:0010358,GO:0010073,GO:0045892,GO:0006355	nucleus|DNA binding|DNA-binding transcription factor activity|leaf development|leaf shaping|meristem maintenance|negative regulation of transcription, DNA-templated|regulation of transcription, DNA-templated	-	-
XM_020821317.2	742.491	253.375	1231.61	4.8608	2.28119	0.000197542	0.00253693	Up	11.4003	10.6669	10.9736	58.6603	58.6022	57.6325	915	110095681	LOC110095681	NDR1/HIN1-like protein 3	GO:0046658,GO:0005794,GO:0016021,GO:0005886,GO:0009506,GO:0005774,GO:0042742,GO:0009816,GO:0051607,GO:0009617,GO:0009751,GO:0009611	anchored component of plasma membrane|Golgi apparatus|integral component of membrane|plasma membrane|plasmodesma|vacuolar membrane|defense response to bacterium|defense response to bacterium, incompatible interaction|defense response to virus|response to bacterium|response to salicylic acid|response to wounding	-	-
XM_020821327.2	46.8319	0	93.6638	Inf	Inf	4.2221e-10	2.8622e-08	Up	3.64915e-08	0.00462007	0.00483437	3.37463	2.78776	0.32366	1874	110095690	LOC110095690	regulation of nuclear pre-mRNA domain-containing protein 1B, transcript variant X4	-	-	-	-
XM_020821364.2	92.167	49.686	134.648	2.70998	1.43828	0.0498812	0.183553	Up	0.571747	0.824529	0.85634	1.56795	3.39514	1.66384	2641	110095717	LOC110095717	twinkle homolog protein, chloroplastic/mitochondrial-like, transcript variant X2	GO:0009507,GO:0005739,GO:0005524,GO:0003678,GO:0003896,GO:0046872,GO:0003697,GO:0009260	chloroplast|mitochondrion|ATP binding|DNA helicase activity|DNA primase activity|metal ion binding|single-stranded DNA binding|ribonucleotide biosynthetic process	-	-
XM_020821368.2	203.029	294.277	111.782	0.379854	-1.39648	0.0320452	0.133339	Down	10.9242	10.4076	12.1651	5.01572	5.03556	3.80669	1048	110095718	LOC110095718	uncharacterized LOC110095718, transcript variant X1	-	-	-	-
XM_020821371.2	1281.98	1804.92	759.044	0.420541	-1.24968	0.0318524	0.132756	Down	94.0865	87.188	96.1497	42.7926	39.4114	44.6571	777	110095721	LOC110095721	3-isopropylmalate dehydrogenase, chloroplastic-like, transcript variant X2	GO:0009507,GO:0009941,GO:0009570,GO:0005829,GO:0009536,GO:0003862,GO:0000287,GO:0070403,GO:0042803,GO:0009553,GO:0009098,GO:0009555	chloroplast|chloroplast envelope|chloroplast stroma|cytosol|plastid|3-isopropylmalate dehydrogenase activity|magnesium ion binding|NAD+ binding|protein homodimerization activity|embryo sac development|leucine biosynthetic process|pollen development	path:dct00290,path:dct00660,path:dct01100,path:dct01110,path:dct01210,path:dct01230	Valine, leucine and isoleucine biosynthesis|C5-Branched dibasic acid metabolism|Metabolic pathways|Biosynthesis of secondary metabolites|2-Oxocarboxylic acid metabolism|Biosynthesis of amino acids
XM_020821376.2	50.757	88.2016	13.3124	0.150931	-2.72804	0.00214145	0.0174556	Down	2.56371	2.07716	2.85958	0.383578	0.272984	0.602925	1402	110095726	LOC110095726	dehydrodolichyl diphosphate synthase 6, transcript variant X2	GO:0005783,GO:0002094,GO:0016094,GO:0006486	endoplasmic reticulum|polyprenyltransferase activity|polyprenol biosynthetic process|protein glycosylation	path:dct00900,path:dct01110	Terpenoid backbone biosynthesis|Biosynthesis of secondary metabolites
XM_020821380.2	50.1911	81.2854	19.0968	0.234936	-2.08966	0.0165153	0.0821871	Down	1.74472	2.23297	2.25859	0.385102	0.664196	0.532684	1554	110095727	LOC110095727	adenylyl-sulfate kinase 3	GO:0005829,GO:0004020,GO:0005524,GO:0019344,GO:0070814,GO:0000103	cytosol|adenylylsulfate kinase activity|ATP binding|cysteine biosynthetic process|hydrogen sulfide biosynthetic process|sulfate assimilation	path:dct00230,path:dct00920,path:dct01100	Purine metabolism|Sulfur metabolism|Metabolic pathways
XM_020821391.2	8623.4	1308.72	15938.1	12.1784	3.60625	8.08626e-09	3.95362e-07	Up	59.0328	59.997	60.601	787.016	763.085	830.194	870	110095737	LOC110095737	ribulose bisphosphate carboxylase large chain	GO:0009507,GO:0000287,GO:0004497,GO:0016984,GO:0009853,GO:0019253	chloroplast|magnesium ion binding|monooxygenase activity|ribulose-bisphosphate carboxylase activity|photorespiration|reductive pentose-phosphate cycle	path:dct00630,path:dct00710,path:dct01100,path:dct01110,path:dct01200	Glyoxylate and dicarboxylate metabolism|Carbon fixation in photosynthetic organisms|Metabolic pathways|Biosynthesis of secondary metabolites|Carbon metabolism
XM_020821397.2	7.02323	0	14.0465	Inf	Inf	0.0129613	0.0688385	Up	0	0	0	0.0679943	0.529527	0.528991	1614	110095741	LOC110095741	nucleobase-ascorbate transporter 6, transcript variant X1	GO:0005618,GO:0005783,GO:0016021,GO:0009506,GO:0005773,GO:0022857	cell wall|endoplasmic reticulum|integral component of membrane|plasmodesma|vacuole|transmembrane transporter activity	-	-
XM_020821401.2	21.1753	41.3996	0.950923	0.0229693	-5.44415	0.000192922	0.00248819	Down	1.50406	1.23624	1.11415	0.0705839	0.0365634	1.36146e-26	1280	110095744	LOC110095744	heptahelical transmembrane protein ADIPOR3	GO:0016021,GO:0038023,GO:0009725,GO:0009744	integral component of membrane|signaling receptor activity|response to hormone|response to sucrose	-	-
XM_020821402.2	44.1002	73.3941	14.8064	0.201738	-2.30944	0.0113332	0.0624113	Down	3.33102	2.8346	3.75527	0.794229	0.860704	0.531038	886	110095745	LOC110095745	uncharacterized LOC110095745, transcript variant X1	-	-	-	-
XM_020821421.2	51.2519	84.826	17.6777	0.2084	-2.26257	0.00884012	0.0518833	Down	1.29707	0.855283	0.276836	0.110537	0.091266	0.351409	4177	110095763	LOC110095763	uncharacterized LOC110095763, transcript variant X1	GO:0000785,GO:0005829,GO:0005634,GO:0009536,GO:0003682,GO:0005085,GO:0042802,GO:0009881,GO:0042803,GO:0009649,GO:0018298,GO:0009411,GO:0010224	chromatin|cytosol|nucleus|plastid|chromatin binding|guanyl-nucleotide exchange factor activity|identical protein binding|photoreceptor activity|protein homodimerization activity|entrainment of circadian clock|protein-chromophore linkage|response to UV|response to UV-B	-	-
XM_020821425.2	625.476	360.343	890.61	2.47156	1.30542	0.0294277	0.125779	Up	4.63792	3.82443	4.2139	10.8199	13.6609	9.59427	3395	110095763	LOC110095763	uncharacterized LOC110095763, transcript variant X3	GO:0000785,GO:0005829,GO:0005634,GO:0009536,GO:0003682,GO:0005085,GO:0042802,GO:0009881,GO:0042803,GO:0009649,GO:0018298,GO:0009411,GO:0010224	chromatin|cytosol|nucleus|plastid|chromatin binding|guanyl-nucleotide exchange factor activity|identical protein binding|photoreceptor activity|protein homodimerization activity|entrainment of circadian clock|protein-chromophore linkage|response to UV|response to UV-B	-	-
XM_020821428.2	309.058	501.453	116.664	0.232651	-2.10376	0.000984318	0.00935831	Down	4.39442	5.4757	6.38889	1.16335	1.32079	1.63934	3682	110095764	LOC110095764	uncharacterized LOC110095764, transcript variant X3	GO:0005938,GO:0005813,GO:0055028,GO:0005737,GO:0009898,GO:0000923,GO:0000930,GO:0008275,GO:0005874,GO:0005635,GO:0005819,GO:0000922,GO:0043015,GO:0015631,GO:0031122,GO:0051321,GO:0007020,GO:0051415,GO:0000278,GO:0090063,GO:0009624,GO:0051225	cell cortex|centrosome|cortical microtubule|cytoplasm|cytoplasmic side of plasma membrane|equatorial microtubule organizing center|gamma-tubulin complex|gamma-tubulin small complex|microtubule|nuclear envelope|spindle|spindle pole|gamma-tubulin binding|tubulin binding|cytoplasmic microtubule organization|meiotic cell cycle|microtubule nucleation|microtubule nucleation by interphase microtubule or…	-	-
XM_020821437.1	10.418	20.5217	0.314343	0.0153176	-6.02867	0.00529505	0.0352229	Down	0.693076	1.61078	1.24574	0.0355574	0	0	690	110095773	LOC110095773	chitinase 4-like	GO:0008061,GO:0004568,GO:0016998,GO:0006032,GO:0006952,GO:0000272	chitin binding|chitinase activity|cell wall macromolecule catabolic process|chitin catabolic process|defense response|polysaccharide catabolic process	path:dct00520,path:dct01100	Amino sugar and nucleotide sugar metabolism|Metabolic pathways
XM_020821439.2	83.7298	44.3512	123.108	2.77576	1.47288	0.0488152	0.180599	Up	0.42436	0.948864	1.3564	3.55936	1.88801	2.82796	1936	110095774	LOC110095774	2-(3-amino-3-carboxypropyl)histidine synthase subunit 2, transcript variant X1	GO:0005829,GO:0016740,GO:0017183	cytosol|transferase activity|peptidyl-diphthamide biosynthetic process from peptidyl-histidine	-	-
XM_020821441.2	297.387	171.532	423.241	2.46741	1.303	0.0376628	0.150129	Up	2.89246	2.60079	3.04717	8.13026	7.6051	7.16931	2401	110095775	LOC110095775	zinc finger CCCH domain-containing protein 7, transcript variant X1	GO:0005634,GO:0003677,GO:0003700,GO:0046872,GO:0045892	nucleus|DNA binding|DNA-binding transcription factor activity|metal ion binding|negative regulation of transcription, DNA-templated	-	-
XM_020821448.2	148.458	234.79	62.1256	0.2646	-1.91811	0.00531787	0.0353202	Down	4.43096	5.68121	4.37345	0.975719	1.24183	1.97912	1938	110095779	LOC110095779	F-box protein At3g26010-like	-	-	-	-
XM_020821449.2	938.524	1315.9	561.144	0.426432	-1.22961	0.0355134	0.14395	Down	17.0843	18.1815	20.6134	6.27384	8.97323	10.7003	2812	110095780	LOC110095780	zinc finger CCCH domain-containing protein 65, transcript variant X1	GO:0003677,GO:0046872	DNA binding|metal ion binding	-	-
XM_020821461.2	768.661	453.024	1084.3	2.39346	1.2591	0.0341647	0.139939	Up	6.96606	6.1545	6.21935	15.5766	17.4373	17.3424	2798	110095786	LOC110095786	uncharacterized LOC110095786, transcript variant X2	GO:0005634,GO:0003677	nucleus|DNA binding	-	-
XM_020821462.2	34.7466	66.5074	2.98572	0.0448931	-4.47736	5.9118e-05	0.000923092	Down	0.491131	1.38874	1.40478	0.00568267	0.0167787	0.135027	2420	110095786	LOC110095786	uncharacterized LOC110095786, transcript variant X3	GO:0005634,GO:0003677	nucleus|DNA binding	-	-
XM_020821466.2	126.216	193.416	59.0164	0.305127	-1.71252	0.0140856	0.0730982	Down	5.30115	4.58664	4.85816	1.63713	1.02592	2.25346	1569	110095789	LOC110095789	E3 ubiquitin-protein ligase RGLG2-like	GO:0005634,GO:0005886,GO:0046872,GO:0004842,GO:0009738,GO:0009850,GO:0009690,GO:0080148	nucleus|plasma membrane|metal ion binding|ubiquitin-protein transferase activity|abscisic acid-activated signaling pathway|auxin metabolic process|cytokinin metabolic process|negative regulation of response to water deprivation	-	-
XM_020821469.2	1916.88	3120.02	713.739	0.228761	-2.12809	0.000342327	0.00397191	Down	95.8089	91.4482	96.5467	22.377	24.6974	23.5342	1313	110095793	LOC110095793	28 kDa ribonucleoprotein, chloroplastic	GO:0009507,GO:0003723,GO:0006397	chloroplast|RNA binding|mRNA processing	-	-
XM_020821485.2	27.8595	49.9391	5.77991	0.115739	-3.11105	0.00512231	0.0343511	Down	1.71132	1.59893	0.949231	0.237733	0.17082	0.13376	1401	110095797	LOC110095797	ELMO domain-containing protein A	-	-	-	-
XM_020821511.2	356.73	516.657	196.804	0.380917	-1.39245	0.0252511	0.112618	Down	27.3849	37.6403	34.4203	15.3588	12.2265	13.6306	620	110095812	LOC110095812	uncharacterized LOC110095812, transcript variant X4	-	-	-	-
XM_020821514.2	16.4141	0	32.8283	Inf	Inf	6.82936e-05	0.00104367	Up	0	0	0	3.11984	2.28186	2.16107	564	110095814	LOC110095814	cyanidin 3-O-rutinoside 5-O-glucosyltransferase-like	GO:0047214,GO:0009718	cyanidin-3-rhamnosylglucoside 5-O-glucosyltransferase activity|anthocyanin-containing compound biosynthetic process	-	-
XM_020821521.2	433.398	38.1488	828.647	21.7215	4.44105	1.72532e-10	1.28831e-08	Up	1.25902	1.0547	0.862208	24.1681	26.8591	24.0522	1434	110095820	LOC110095820	cyanidin 3-O-rutinoside 5-O-glucosyltransferase	GO:0047214,GO:0009718	cyanidin-3-rhamnosylglucoside 5-O-glucosyltransferase activity|anthocyanin-containing compound biosynthetic process	-	-
XM_020821527.2	6358.43	10064.9	2652	0.263491	-1.92417	0.00100767	0.00953826	Down	154.069	155.287	152.955	47.6379	43.3979	41.4699	2600	110095825	LOC110095825	nucleolin 2, transcript variant X3	GO:0005730,GO:1990904,GO:0031491,GO:0003723,GO:0006364	nucleolus|ribonucleoprotein complex|nucleosome binding|RNA binding|rRNA processing	-	-
XM_020821528.2	712.526	1095.51	329.544	0.300814	-1.73306	0.00401768	0.0283312	Down	16.9549	17.1749	16.0175	5.09545	6.47815	4.8427	2609	110095825	LOC110095825	nucleolin 2, transcript variant X5	GO:0005730,GO:1990904,GO:0031491,GO:0003723,GO:0006364	nucleolus|ribonucleoprotein complex|nucleosome binding|RNA binding|rRNA processing	-	-
XM_020821537.2	835.196	1216.04	454.348	0.373628	-1.42032	0.0163247	0.0814937	Down	25.0408	21.0277	24.8316	9.76641	10.1259	8.9376	2048	110095828	LOC110095828	pentatricopeptide repeat-containing protein At3g59040	-	-	-	-
XM_020821549.2	462.57	181.086	744.054	4.10884	2.03873	0.00102793	0.00969959	Up	6.33281	5.22482	4.0595	23.3593	23.2865	23.1007	1386	110095838	LOC110095838	ribosome production factor 1, transcript variant X3	GO:0005730,GO:0005634,GO:0030687,GO:0005732,GO:0042134,GO:0000466,GO:0000463,GO:0000027,GO:0006364	nucleolus|nucleus|preribosome, large subunit precursor|small nucleolar ribonucleoprotein complex|rRNA primary transcript binding|maturation of 5.8S rRNA from tricistronic rRNA transcript (SSU-rRNA, 5.8S rRNA, LSU-rRNA)|maturation of LSU-rRNA from tricistronic rRNA transcript (SSU-rRNA, 5.8S rRNA, LSU-rRNA)|ribosomal large subunit assembly|rRNA processing	-	-
XM_020821558.2	17.985	1.32269	34.6473	26.1946	4.71119	0.00143833	0.012676	Up	0.0391327	0.0422437	0.079849	1.26184	0.920084	1.55266	1208	110095850	LOC110095850	disease resistance protein PIK6-NP-like	GO:0043531,GO:0005524,GO:0006952	ADP binding|ATP binding|defense response	-	-
XM_020821561.2	342.422	181.139	503.706	2.78077	1.47549	0.0176325	0.0864347	Up	8.89046	8.52595	8.69867	28.844	24.0119	26.0424	829	110095853	LOC110095853	1,4-dihydroxy-2-naphthoyl-CoA thioesterase 1	GO:0005777,GO:0061522,GO:0016289,GO:0042372,GO:0051289	peroxisome|1,4-dihydroxy-2-naphthoyl-CoA thioesterase activity|CoA hydrolase activity|phylloquinone biosynthetic process|protein homotetramerization	path:dct00130,path:dct01100,path:dct01110	Ubiquinone and other terpenoid-quinone biosynthesis|Metabolic pathways|Biosynthesis of secondary metabolites
XM_020821570.1	160.427	35.8707	284.983	7.94472	2.99	2.73917e-05	0.000488276	Up	2.40735	2.17758	1.69945	18.2676	17.2564	18.9508	680	110095863	LOC110095863	uncharacterized LOC110095863	GO:0005829,GO:0005634,GO:0003700,GO:0043565,GO:0048457,GO:0010154,GO:0080006,GO:0010076,GO:0010077,GO:0045892,GO:0007389,GO:1905393,GO:0010223,GO:0048367,GO:0010228,GO:0010051,GO:0010089	cytosol|nucleus|DNA-binding transcription factor activity|sequence-specific DNA binding|floral whorl morphogenesis|fruit development|internode patterning|maintenance of floral meristem identity|maintenance of inflorescence meristem identity|negative regulation of transcription, DNA-templated|pattern specification process|plant organ formation|secondary shoot formation|shoot system development|veg…	-	-
XM_020821579.2	186.81	54.1722	319.447	5.89688	2.55995	0.000185881	0.00240871	Up	2.63759	2.58092	2.23725	15.6032	16.254	15.7998	871	110095872	LOC110095872	protodermal factor 1	GO:0005576	extracellular region	-	-
XM_020821589.2	4565.05	8624.8	505.298	0.0585866	-4.09329	1.73173e-10	1.2899e-08	Down	201.424	197.643	196.672	13.2385	11.2333	13.5013	1729	110095886	LOC110095886	probable flavin-containing monooxygenase 1	GO:0050660,GO:0004499,GO:0050661,GO:0031543,GO:0062047,GO:0071456,GO:0009870,GO:0010204,GO:0042742,GO:0050832,GO:0062034,GO:0009626,GO:0051707,GO:0009627	flavin adenine dinucleotide binding|N,N-dimethylaniline monooxygenase activity|NADP binding|peptidyl-proline dioxygenase activity|pipecolic acid N-hydroxylase|cellular response to hypoxia|defense response signaling pathway, resistance gene-dependent|defense response signaling pathway, resistance gene-independent|defense response to bacterium|defense response to fungus|L-pipecolic acid biosyntheti…	-	-
XM_020821596.2	18.8427	34.1668	3.51864	0.102984	-3.2795	0.0122319	0.0661054	Down	1.25926	1.10782	0.959788	0.200156	0.100074	0.0820131	1225	110095897	LOC110095897	transmembrane protein 45B	-	-	-	-
XM_020821599.2	2247.85	1171.93	3323.76	2.83614	1.50393	0.0101214	0.057577	Up	12.443	9.6205	11.0418	33.7286	33.6812	34.755	4227	110095900	LOC110095900	uncharacterized LOC110095900, transcript variant X2	-	-	-	-
XM_020821600.2	2190.7	1219.77	3161.63	2.59198	1.37406	0.0177824	0.0869716	Up	11.5962	11.7979	11.1006	33.2925	31.7522	32.2045	4224	110095900	LOC110095900	uncharacterized LOC110095900, transcript variant X3	-	-	-	-
XM_020821603.2	45.1635	90.0047	0.322236	0.00358021	-8.12574	4.5775e-09	2.37267e-07	Down	2.18699	2.32141	2.4984	0	0.018516	0	1528	110095902	LOC110095902	shikimate O-hydroxycinnamoyltransferase	GO:0047172	shikimate O-hydroxycinnamoyltransferase activity	-	-
XM_020821613.2	243.991	374.438	113.543	0.303235	-1.72149	0.00810789	0.0486264	Down	3.97715	5.2529	5.01619	0.867641	3.82933	2.90392e-06	3139	110095905	LOC110095905	GPI ethanolamine phosphate transferase 2-like, transcript variant X2	GO:0030176,GO:0051267,GO:0006506	integral component of endoplasmic reticulum membrane|CP2 mannose-ethanolamine phosphotransferase activity|GPI anchor biosynthetic process	path:dct00563	Glycosylphosphatidylinositol (GPI)-anchor biosynthesis
XM_020821615.2	190.723	297.911	83.5347	0.280402	-1.83443	0.00570759	0.0372766	Down	3.77636	2.61276	3.10196	1.48843	0.503105	0.898157	3747	110095906	LOC110095906	ubiquitin carboxyl-terminal hydrolase 17, transcript variant X1	GO:0016021,GO:0004197,GO:0046872,GO:0004843,GO:0036459,GO:0051301,GO:0009908,GO:0048366,GO:0016579,GO:1901000,GO:0009651,GO:0048364,GO:0048367,GO:0006511	integral component of membrane|cysteine-type endopeptidase activity|metal ion binding|thiol-dependent ubiquitin-specific protease activity|thiol-dependent ubiquitinyl hydrolase activity|cell division|flower development|leaf development|protein deubiquitination|regulation of response to salt stress|response to salt stress|root development|shoot system development|ubiquitin-dependent protein catabo…	-	-
XM_020821616.2	584.277	192.433	976.122	5.07253	2.34271	0.000160274	0.00213749	Up	2.31815	2.12621	1.97531	11.735	11.1274	12.5885	3578	110095906	LOC110095906	ubiquitin carboxyl-terminal hydrolase 17, transcript variant X2	GO:0016021,GO:0004197,GO:0046872,GO:0004843,GO:0036459,GO:0051301,GO:0009908,GO:0048366,GO:0016579,GO:1901000,GO:0009651,GO:0048364,GO:0048367,GO:0006511	integral component of membrane|cysteine-type endopeptidase activity|metal ion binding|thiol-dependent ubiquitin-specific protease activity|thiol-dependent ubiquitinyl hydrolase activity|cell division|flower development|leaf development|protein deubiquitination|regulation of response to salt stress|response to salt stress|root development|shoot system development|ubiquitin-dependent protein catabo…	-	-
XM_020821626.2	1047.58	414.817	1680.35	4.05083	2.01822	0.000771636	0.00769265	Up	8.67681	8.68445	9.32095	40.0502	39.2359	38.2792	1857	110095913	LOC110095913	uncharacterized LOC110095913	-	-	-	-
XM_020821630.2	2311.42	623.85	3999	6.41019	2.68037	9.90426e-06	0.000204785	Up	7.55808	7.56689	8.17409	52.3008	55.5647	54.6587	3197	110095912	LOC110095912	E4 SUMO-protein ligase PIAL2	GO:0005634,GO:0016874,GO:0019789,GO:0008270,GO:0051176,GO:0016925,GO:0009737,GO:0006970,GO:0009651	nucleus|ligase activity|SUMO transferase activity|zinc ion binding|positive regulation of sulfur metabolic process|protein sumoylation|response to abscisic acid|response to osmotic stress|response to salt stress	path:dct04120	Ubiquitin mediated proteolysis
XM_020821636.2	294.533	151.777	437.29	2.88114	1.52664	0.0143172	0.0739316	Up	2.95825	3.47131	1.98838	10.3117	10.3666	5.70781	2151	110095917	LOC110095917	bifunctional dihydrofolate reductase-thymidylate synthase, transcript variant X3	GO:0005829,GO:0005739,GO:0004146,GO:0004799,GO:0006231,GO:0006730,GO:0046654	cytosol|mitochondrion|dihydrofolate reductase activity|thymidylate synthase activity|dTMP biosynthetic process|one-carbon metabolic process|tetrahydrofolate biosynthetic process	path:dct00240,path:dct00670,path:dct00790,path:dct01100	Pyrimidine metabolism|One carbon pool by folate|Folate biosynthesis|Metabolic pathways
XM_020821639.2	32.5524	6.64714	58.4577	8.79441	3.13659	0.00289215	0.0219546	Up	0.624267	0.458048	0.208071	2.92502	4.20063	5.30768	610	110095920	LOC110095920	influenza virus NS1A-binding protein-like	-	-	-	-
XM_020821640.2	28.2774	53.942	2.61279	0.0484371	-4.36774	0.000242136	0.00299981	Down	1.09457	1.06241	1.49824	0.0247431	0.0768154	0.108436	1761	110095921	LOC110095921	kelch repeat-containing protein At3g27220	GO:0005768,GO:0005794,GO:0016021,GO:0005802,GO:0009061	endosome|Golgi apparatus|integral component of membrane|trans-Golgi network|anaerobic respiration	-	-
XM_020821651.2	134.017	236.873	31.1608	0.131551	-2.92631	5.23877e-05	0.000832217	Down	9.50276	2.10792	6.7908	1.11036	0.889007	0.62349	1537	110095927	LOC110095927	SAP-like protein BP-73, transcript variant X1	GO:0003677,GO:0006353,GO:0040008	DNA binding|DNA-templated transcription, termination|regulation of growth	-	-
XM_020821664.2	1496.42	928.233	2064.6	2.22423	1.15331	0.0476716	0.177838	Up	16.2671	14.8615	16.9266	37.7497	40.8411	37.667	2307	110095937	LOC110095937	signal recognition particle subunit SRP72, transcript variant X2	-	-	path:dct03060	Protein export
XM_020821665.2	117.3	208.437	26.1639	0.125524	-2.99396	6.33525e-05	0.000982094	Down	7.12667	7.5747	7.32383	1.08633	0.853769	1.08193	1130	110095938	LOC110095938	putative calcium-binding protein CML19	GO:0005509	calcium ion binding	-	-
XM_020821667.2	57.4618	27.4938	87.4299	3.17999	1.66902	0.0481981	0.179101	Up	0.307	8.33009e-16	1.98013	2.7948	2.65535	2.47475	1430	110095939	LOC110095939	ALBINO3-like protein 2, chloroplastic, transcript variant X4	GO:0031305,GO:0005739,GO:0032977,GO:0033617,GO:0051205,GO:0032979	integral component of mitochondrial inner membrane|mitochondrion|membrane insertase activity|mitochondrial respiratory chain complex IV assembly|protein insertion into membrane|protein insertion into mitochondrial inner membrane from matrix	-	-
XM_020821687.2	182.853	75.2107	290.495	3.86242	1.9495	0.00369148	0.0265905	Up	3.31802	2.74076	2.4595	12.0646	12.3514	11.3374	1055	110095954	LOC110095954	uncharacterized LOC110095954, transcript variant X1	-	-	-	-
XM_020821699.2	577.816	849.579	306.053	0.360241	-1.47297	0.0146095	0.075017	Down	11.6192	11.9508	11.5562	4.64884	4.64461	4.46334	2889	110095965	LOC110095965	uncharacterized LOC110095965	GO:0005634,GO:0008134,GO:0048527	nucleus|transcription factor binding|lateral root development	-	-
XM_020821700.2	434.985	613.833	256.137	0.417274	-1.26093	0.038412	0.152238	Down	12.0146	12.7398	12.5886	5.73394	5.48181	5.74302	1962	110095966	LOC110095966	serine/threonine-protein kinase STN7, chloroplastic	GO:0009507,GO:0009535,GO:0042651,GO:0005524,GO:0004672,GO:0004674,GO:0007623,GO:0009643,GO:0042548	chloroplast|chloroplast thylakoid membrane|thylakoid membrane|ATP binding|protein kinase activity|protein serine/threonine kinase activity|circadian rhythm|photosynthetic acclimation|regulation of photosynthesis, light reaction	-	-
XM_020821705.1	67.7932	14.3227	121.264	8.46654	3.08177	0.000285696	0.00343115	Up	0.571748	0.173362	0.391974	4.08285	2.89384	3.48567	1506	110095970	LOC110095970	scopoletin glucosyltransferase-like	GO:0043231,GO:0042802,GO:0050275,GO:0008194	intracellular membrane-bounded organelle|identical protein binding|scopoletin glucosyltransferase activity|UDP-glycosyltransferase activity	path:dct00940,path:dct01110	Phenylpropanoid biosynthesis|Biosynthesis of secondary metabolites
XM_020821706.2	186.237	2.25247	370.221	164.362	7.36073	8.92676e-16	2.17172e-13	Up	0.0763301	0.00029142	0.1028	10.2249	12.1985	10.6486	1455	110095971	LOC110095971	UDP-glycosyltransferase 73B4-like	GO:0005829,GO:0043231,GO:0102360,GO:0047893,GO:0102425,GO:0080043,GO:0080044,GO:0035251,GO:0008194,GO:0051707,GO:0009636	cytosol|intracellular membrane-bounded organelle|daphnetin 3-O-glucosyltransferase activity|flavonol 3-O-glucosyltransferase activity|myricetin 3-O-glucosyltransferase activity|quercetin 3-O-glucosyltransferase activity|quercetin 7-O-glucosyltransferase activity|UDP-glucosyltransferase activity|UDP-glycosyltransferase activity|response to other organism|response to toxic substance	path:dct00940,path:dct01110	Phenylpropanoid biosynthesis|Biosynthesis of secondary metabolites
XM_020821707.2	66.4687	103.572	29.3654	0.283527	-1.81844	0.0228879	0.104774	Down	2.12171	2.03074	2.93049	0.794688	0.659196	0.713648	1747	110095972	LOC110095972	scopoletin glucosyltransferase-like	GO:0043231,GO:0042802,GO:0050275,GO:0008194	intracellular membrane-bounded organelle|identical protein binding|scopoletin glucosyltransferase activity|UDP-glycosyltransferase activity	path:dct00940,path:dct01110	Phenylpropanoid biosynthesis|Biosynthesis of secondary metabolites
XM_020821718.2	83.8927	9.67961	158.106	16.3339	4.0298	1.86643e-06	4.93034e-05	Up	0.313771	0.29739	0.144696	5.18716	3.73876	4.64342	1515	110095978	LOC110095978	scopoletin glucosyltransferase-like	GO:0043231,GO:0042802,GO:0050275,GO:0008194	intracellular membrane-bounded organelle|identical protein binding|scopoletin glucosyltransferase activity|UDP-glycosyltransferase activity	path:dct00940,path:dct01110	Phenylpropanoid biosynthesis|Biosynthesis of secondary metabolites
XM_020821727.2	59.8006	6.27665	113.325	18.0549	4.17432	5.22242e-06	0.000118011	Up	2.19413e-08	0.281877	0.0823802	2.65834	2.57876	1.88354	2063	110095985	LOC110095985	hexokinase-1	GO:0005623,GO:0005829,GO:0016021,GO:0005741,GO:0005739,GO:0005634,GO:0009536,GO:0032991,GO:0005774,GO:0005773,GO:0005524,GO:0001047,GO:0008865,GO:0004340,GO:0005536,GO:0004396,GO:0019158,GO:0008270,GO:0001678,GO:0010255,GO:0006096,GO:0019320,GO:0012501,GO:0006357,GO:0090332,GO:0010182,GO:0010148	cell|cytosol|integral component of membrane|mitochondrial outer membrane|mitochondrion|nucleus|plastid|protein-containing complex|vacuolar membrane|vacuole|ATP binding|core promoter binding|fructokinase activity|glucokinase activity|glucose binding|hexokinase activity|mannokinase activity|zinc ion binding|cellular glucose homeostasis|glucose mediated signaling pathway|glycolytic process|hexose ca…	path:dct00010,path:dct00051,path:dct00052,path:dct00500,path:dct00520,path:dct01100,path:dct01110,path:dct01200	Glycolysis / Gluconeogenesis|Fructose and mannose metabolism|Galactose metabolism|Starch and sucrose metabolism|Amino sugar and nucleotide sugar metabolism|Metabolic pathways|Biosynthesis of secondary metabolites|Carbon metabolism
XM_020821731.2	48.1722	17.6459	78.6986	4.45988	2.15701	0.0147337	0.0754747	Up	0.700286	0.554655	0.10785	1.98184	1.98935	2.57822	1566	110095989	LOC110095989	scopoletin glucosyltransferase-like	GO:0043231,GO:0042802,GO:0050275,GO:0008194	intracellular membrane-bounded organelle|identical protein binding|scopoletin glucosyltransferase activity|UDP-glycosyltransferase activity	path:dct00940,path:dct01110	Phenylpropanoid biosynthesis|Biosynthesis of secondary metabolites
XM_020821732.2	91.087	21.6745	160.5	7.405	2.8885	0.000215948	0.00273604	Up	0.683535	0.660723	0.355604	4.14161	4.48806	5.02477	1528	110095990	LOC110095990	scopoletin glucosyltransferase-like	GO:0043231,GO:0042802,GO:0050275,GO:0008194	intracellular membrane-bounded organelle|identical protein binding|scopoletin glucosyltransferase activity|UDP-glycosyltransferase activity	path:dct00940,path:dct01110	Phenylpropanoid biosynthesis|Biosynthesis of secondary metabolites
XM_020821736.2	138.634	59.4887	217.778	3.66084	1.87217	0.00658364	0.0414476	Up	1.74181	1.82662	0.809669	7.72117	5.3777	4.33407	1622	110095994	LOC110095994	scopoletin glucosyltransferase-like	GO:0043231,GO:0042802,GO:0050275,GO:0008194	intracellular membrane-bounded organelle|identical protein binding|scopoletin glucosyltransferase activity|UDP-glycosyltransferase activity	path:dct00940,path:dct01110	Phenylpropanoid biosynthesis|Biosynthesis of secondary metabolites
XM_020821737.2	124.18	64.246	184.114	2.86577	1.51892	0.0292343	0.125241	Up	1.0816	1.283	1.25499	3.86012	4.11422	3.26111	2126	110095996	LOC110095996	BURP domain-containing protein 12	-	-	-	-
XM_020821740.2	9.14225	0	18.2845	Inf	Inf	0.00353759	0.025765	Up	0.00692496	0.000308052	1.35212e-06	0.468483	0.727418	0.18431	1751	110095997	LOC110095997	uncharacterized protein YKR070W, transcript variant X4	GO:0005739,GO:0046474	mitochondrion|glycerophospholipid biosynthetic process	-	-
XM_020821751.2	133.204	17.5274	248.882	14.1996	3.82778	6.04567e-07	1.8238e-05	Up	0.216135	0.204591	0.288884	3.17402	3.67741	3.96589	2989	110096006	LOC110096006	homeobox-leucine zipper protein ROC3	GO:0005634,GO:0008289,GO:0043565,GO:0006355	nucleus|lipid binding|sequence-specific DNA binding|regulation of transcription, DNA-templated	-	-
XM_020821757.2	820.302	498.058	1142.55	2.294	1.19787	0.0419055	0.16201	Up	7.77057	8.32316	7.93301	21.6194	18.8589	19.4624	2476	110096014	LOC110096014	peptidyl-prolyl cis-trans isomerase CYP59	GO:0005829,GO:0005634,GO:0003755,GO:0003723,GO:0008270,GO:1901407	cytosol|nucleus|peptidyl-prolyl cis-trans isomerase activity|RNA binding|zinc ion binding|regulation of phosphorylation of RNA polymerase II C-terminal domain	-	-
XM_020821762.2	52.8024	16.7209	88.8839	5.31573	2.41027	0.00549867	0.0363175	Up	0.167789	0.33802	0.374263	1.66699	1.67845	1.79425	2255	110096016	LOC110096016	uncharacterized LOC110096016	-	-	-	-
XM_020821764.2	782.134	1082.92	481.349	0.444492	-1.16977	0.0477092	0.177904	Down	28.7076	29.0193	28.9681	14.4488	12.8273	14.6563	1492	110096018	LOC110096018	uncharacterized protein At1g32220, chloroplastic, transcript variant X1	GO:0009507,GO:0005634,GO:0010287,GO:0009579,GO:0003954,GO:0006979,GO:1901006	chloroplast|nucleus|plastoglobule|thylakoid|NADH dehydrogenase activity|response to oxidative stress|ubiquinone-6 biosynthetic process	-	-
XM_020821795.2	30.4797	59.0203	1.93903	0.0328536	-4.92781	4.76947e-05	0.000773551	Down	2.92655	3.39862	2.59028	0.0820432	0.0863513	0.0904825	789	110096036	LOC110096036	cyclin-U2-2	GO:0019901,GO:0007049,GO:0051301,GO:0000079	protein kinase binding|cell cycle|cell division|regulation of cyclin-dependent protein serine/threonine kinase activity	-	-
XM_020821805.2	2035.31	727.908	3342.71	4.59221	2.19919	0.000213135	0.0027084	Up	12.3085	17.4999	14.6356	71.7744	74.1629	76.1004	1956	110096044	LOC110096044	eukaryotic peptide chain release factor subunit 1-3-like, transcript variant X1	GO:0005829,GO:0018444,GO:1990825,GO:0003747,GO:0016149,GO:0002184,GO:0040008,GO:0006415	cytosol|translation release factor complex|sequence-specific mRNA binding|translation release factor activity|translation release factor activity, codon specific|cytoplasmic translational termination|regulation of growth|translational termination	path:dct03015	mRNA surveillance pathway
XM_020821806.2	12	23.6856	0.314343	0.0132715	-6.23553	0.00238834	0.0189124	Down	0.146514	0.3852	0.228674	0.00900902	0.00128401	0.00020645	3758	110096045	LOC110096045	protein OPAQUE10, transcript variant X2	GO:0005789,GO:0016021	endoplasmic reticulum membrane|integral component of membrane	-	-
XM_020821819.2	323.681	53.8771	593.485	11.0155	3.46147	2.98714e-07	9.82541e-06	Up	2.06277	2.23235	2.04674	24.6332	27.3405	24.2207	1012	110096054	LOC110096054	uncharacterized LOC110096054	-	-	-	-
XM_020821821.2	170.634	6.02188	335.246	55.6713	5.79886	2.70662e-12	3.04666e-10	Up	0.175427	0.227701	0.131481	11.0645	10.4372	11.0158	1338	110096052	LOC110096052	uncharacterized LOC110096052	-	-	-	-
XM_020821822.2	14.4018	25.5542	3.24937	0.127156	-2.97533	0.0386004	0.152756	Down	0.663057	0.617611	0.557622	0.0437749	0.100003	0.114064	1673	110096056	LOC110096056	uncharacterized LOC110096056	-	-	-	-
XM_020821823.2	30.8259	5.27912	56.3727	10.6784	3.41663	0.00176318	0.0149872	Up	0.0803122	0.059655	0.0815172	0.69802	0.794753	0.955033	2993	110096057	LOC110096057	probable WRKY transcription factor 49	GO:0005634,GO:0003700,GO:0043565	nucleus|DNA-binding transcription factor activity|sequence-specific DNA binding	-	-
XM_020821829.2	877.242	501.573	1252.91	2.49796	1.32075	0.0253717	0.112893	Up	13.725	13.4343	12.2325	34.1239	37.3274	35.5753	1521	110096060	LOC110096060	uncharacterized membrane protein At4g09580	GO:0005783,GO:0016021	endoplasmic reticulum|integral component of membrane	-	-
XM_020821838.2	280.94	410.734	151.146	0.367991	-1.44226	0.0225459	0.103621	Down	6.64917	6.88349	7.29848	3.00157	2.93851	2.40151	2354	110096068	LOC110096068	L-type lectin-domain containing receptor kinase IV.1	GO:0016021,GO:0005524,GO:0030246,GO:0004672	integral component of membrane|ATP binding|carbohydrate binding|protein kinase activity	-	-
XM_020821844.2	52.8652	91.6028	14.1275	0.154226	-2.69688	0.00227692	0.0182196	Down	6.8707	6.94912	7.55976	1.61883	1.13776	0.88608	512	110096075	LOC110096075	uncharacterized LOC110096075	-	-	-	-
XM_020821847.2	464.677	110.454	818.899	7.41392	2.89024	6.66709e-06	0.000145533	Up	2.11442	2.37004	2.27207	17.4093	17.8391	19.2594	1952	110096079	LOC110096079	glutamate decarboxylase	GO:0005829,GO:0005516,GO:0004351,GO:0030170,GO:0006538,GO:0046686	cytosol|calmodulin binding|glutamate decarboxylase activity|pyridoxal phosphate binding|glutamate catabolic process|response to cadmium ion	path:dct00250,path:dct00410,path:dct00430,path:dct00650,path:dct01100,path:dct01110	Alanine, aspartate and glutamate metabolism|beta-Alanine metabolism|Taurine and hypotaurine metabolism|Butanoate metabolism|Metabolic pathways|Biosynthesis of secondary metabolites
XM_020821850.2	196.984	64.7133	329.254	5.08789	2.34707	0.000501699	0.00539756	Up	1.59928	2.09486	3.08837	13.6567	12.1633	11.6367	1141	110096081	LOC110096081	tetraspanin-19-like	GO:0016021,GO:0005774	integral component of membrane|vacuolar membrane	-	-
[truncated: 7,234 more rows]
