# Supplementary material for: Whole-Transcriptome Sequencing Reveals the Global Molecular Responses and NAC Transcription Factors Involved in Drought Stress in Dendrobium catenatum
Source: Antioxidants (Basel). 2024 Jan 12;13(1):94. doi: 10.3390/antiox13010094 (PMC10812421; doi:10.3390/antiox13010094)
Supplement: Supplementary file 1 [file antioxidants-13-00094-s001.zip › Table S2-Basic information of DcNAC Gene family.xlsx]

## Sheet: NAC information
Sequence ID	RENAME	NCBI LOC ID	Number of Amino Acid	Molecular Weight	Theoretical pI	Instability Index	Aliphatic Index	Grand Average of Hydropathicity
XM_020816724.2	XM_020816724.2	LOC110092252	424	47334.7	6.63	55.2	59.39	-0.82
XM_020817428.2	DcNAC2.2	LOC110092756	331	37661.4	8.92	53.05	68.37	-0.683
XM_020817492.2	XM_020817492.2	LOC110092814	308	35870.4	6.49	50.02	63.25	-0.767
XM_020817642.2	DcNAC68	LOC110092932	300	34210.6	5.37	44.75	63.8	-0.716
XM_020820242.2	XM_020820242.2	LOC110094901	313	36624.1	6.21	45.49	66.93	-0.778
XM_020820285.2	XM_020820285.2	LOC110094938	302	34475.9	5.73	41.14	67.12	-0.585
XM_020820751.2	XM_020820751.2	LOC110095285	264	30494.2	5.94	48.45	61.63	-0.694
XM_020820947.2	DcNAC73	LOC110095412	269	30904.7	7.25	42.5	60.86	-0.975
XM_020821467.2	DcNAC10	LOC110095790	338	36977.5	8.62	47.38	69.67	-0.521
XM_020823446.2	XM_020823446.2	LOC110097190	600	67135.6	4.78	43.71	68.75	-0.467
XM_020823627.2	XM_020823627.2	LOC110097330	437	50029.7	6.15	46.94	77.16	-0.602
XM_020824627.2	XM_020824627.2	LOC110097953	198	22498.4	5.8	42.4	64.49	-0.504
XM_020825418.2	XM_020825418.2	LOC110098556	321	36574.6	6.06	61.74	74.49	-0.538
XM_020825523.2	DcNAC2	LOC110098637	302	33680.4	8.83	46.42	67.32	-0.55
XM_020825678.2	DcNAC68.2	LOC110098761	274	31283	5.42	45.44	62.34	-0.698
XM_020826864.2	DcNAC53	LOC110099650	379	42025	4.9	62.99	59.97	-0.791
XM_020827205.2	DcNAC78	LOC110099898	539	60658.9	4.5	45.72	68.01	-0.646
XM_020827537.2	XM_020827537.2	LOC110100119	219	25000.5	9.17	56.2	70.73	-0.621
XM_020827919.2	DcNAC43	LOC110100421	377	41966.8	6.6	45.23	69.1	-0.536
XM_020828668.2	XM_020828668.2	LOC110100943	624	68834.7	4.84	43.26	72.26	-0.525
XM_020828679.2	XM_020828679.2	LOC110100951	619	68611.9	4.86	38.44	74.09	-0.494
XM_020829073.2	XM_020829073.2	LOC110101259	331	37091	6.27	48.52	70.39	-0.398
XM_020829649.2	DcNAC22	LOC110101656	168	19474.2	9.99	45.13	66.79	-0.75
XM_020829921.2	DcNAC73.1	LOC110101851	293	32750.7	8.37	35.47	62.83	-0.812
XM_020830135.2	XM_020830135.2	LOC110102005	1015	113698	5.25	49.39	84.68	-0.389
XM_020831109.2	XM_020831109.2	LOC110102675	241	27234.3	9.16	37.69	56.97	-0.579
XM_020831669.2	XM_020831669.2	LOC110103097	384	43029.4	7.04	48.55	68.31	-0.687
XM_020832958.2	DcNAC87.1	LOC110104023	297	34274.1	9.02	40.9	68.28	-0.708
XM_020833070.2	DcNAC32	LOC110104101	326	37437.1	8.8	42.17	65.25	-0.762
XM_020833288.2	XM_020833288.2	LOC110104261	318	36002.8	5.59	48.1	69.62	-0.487
XM_020833427.2	XM_020833427.2	LOC110104359	316	35490.4	6.8	51.18	68.26	-0.522
XM_020833439.2	XM_020833439.2	LOC110104365	319	36156.9	5.63	46.32	67.21	-0.54
XM_020833643.2	XM_020833643.2	LOC110104495	336	39207.8	5.45	44.31	65.57	-0.835
XM_020834071.2	DcNAC30	LOC110104809	275	31701.4	6.32	47.32	59.6	-0.715
XM_020834167.2	XM_020834167.2	LOC110104882	314	35401.1	8.16	45.8	59.33	-0.579
XM_020834589.1	XM_020834589.1	LOC110105195	327	37205.7	6.73	34.29	63.27	-0.691
XM_020835443.2	DcNAC29.1	LOC110105798	330	37903.6	6.8	40.16	72.12	-0.688
XM_020835475.2	XM_020835475.2	LOC110105825	222	25025.5	8.69	32.15	70.72	-0.714
XM_020836812.2	DcNAC92.1	LOC110106797	369	41453.7	5.96	47.7	62.9	-0.611
XM_020836943.2	XM_020836943.2	LOC110106875	324	36456.2	8.76	44.68	63.55	-0.656
XM_020837222.2	XM_020837222.2	LOC110107078	273	31914	6.07	39.56	60.66	-0.765
XM_020837411.2	XM_020837411.2	LOC110107219	326	36900.7	8.48	30.46	58.93	-0.646
XM_020837700.2	DcNAC83L	LOC110107435	192	21732.4	9.53	43.57	86.88	-0.051
XM_020837752.2	XM_020837752.2	LOC110107480	299	34418.2	5.23	44.55	62.27	-0.831
XM_020837942.2	DcNAC7	LOC110107637	286	33752.3	7.63	48.99	73.57	-0.786
XM_020838030.2	DcNAC71.1	LOC110107694	361	40936.1	5.51	49.51	68.53	-0.47
XM_020838311.2	DcNAC2.1	LOC110107876	262	30176	5.32	50.73	67.75	-0.597
XM_020838323.2	XM_020838323.2	LOC110107887	313	36043.7	6.55	56.66	67.32	-0.645
XM_020839025.2	XM_020839025.2	LOC110108396	311	35992.3	5.54	42.43	62.7	-0.675
XM_020839154.2	XM_020839154.2	LOC110108485	250	28556.2	8.58	44.87	65.16	-0.726
XM_020839422.2	DcNAC87	LOC110108674	315	35637.3	8.6	38.86	59.75	-0.584
XM_020840865.2	XM_020840865.2	LOC110109664	428	48101.8	5.36	43.37	66.52	-0.707
XM_020841407.2	DcNAC71	LOC110110098	331	37779	5.78	53.18	66.89	-0.397
XM_020842319.2	DcNAC22.1	LOC110110716	313	35854.2	7.8	51.41	65.78	-0.734
XM_020842327.2	DcNAC29	LOC110110725	333	37747.7	7.65	49.94	68.89	-0.635
XM_020842424.2	XM_020842424.2	LOC110110797	661	75617.9	6	46.27	65.82	-0.657
XM_020842980.2	DcNAC104L	LOC110111207	195	22131.7	4.97	36.17	61.9	-0.438
XM_020843353.2	XM_020843353.2	LOC110111452	345	39421.7	6.32	39.52	64.41	-0.58
XM_020843361.2	DcNAC68.1	LOC110111459	246	28253.8	6.01	46.52	69.51	-0.795
XM_020843775.2	DcNAC92	LOC110111768	308	35236	6.04	42.24	57.66	-0.64
XM_020844094.2	XM_020844094.2	LOC110112020	156	17995.6	9.76	40.61	68.21	-0.625
XM_020844911.1	XM_020844911.1	LOC110112624	386	43569.3	5.45	39	54.04	-0.856
XM_020844913.1	XM_020844913.1	LOC110112625	420	48344.8	8.92	43.9	67.76	-0.586
XM_020845384.2	XM_020845384.2	LOC110112974	247	28249.1	7.66	51.59	76.6	-0.507
XM_020847072.2	DcNAC86L	LOC110114255	566	64687.8	5.74	45.99	68.37	-0.55
XM_020847086.1	XM_020847086.1	LOC110114265	236	27237.5	4.94	49.34	61.95	-0.761
XM_020847135.2	XM_020847135.2	LOC110114298	398	45257.3	6.68	46.07	62.76	-0.543
XM_020847155.1	XM_020847155.1	LOC110114311	236	26542.4	6.25	49.8	86.78	-0.233
XM_020847472.2	XM_020847472.2	LOC110114553	398	45003.1	6.55	45.81	61.56	-0.524
XM_020848085.2	DcNAC35	LOC110115000	320	36494.9	6.68	56.54	67.38	-0.729
XM_020848733.2	XM_020848733.2	LOC110115485	269	31452.3	5.16	48.27	63.79	-0.791
XM_020849408.2	DcNAC87.2	LOC110115981	231	26844.4	6.66	25.88	64.94	-0.673
XM_020849949.2	XM_020849949.2	LOC110116407	601	67204.8	5.77	50.3	75.77	-0.506
XM_020850268.2	XM_020850268.2	LOC110116607	284	32232.5	6.9	56.94	65.25	-0.47
XM_028691669.1	XM_028691669.1	LOC110098358	628	70868.1	6.37	49.37	77.05	-0.511
XM_028691952.1	DcNAC2L	LOC114578614	88	10340.8	6.56	42.21	62.16	-0.666
XM_028692844.1	XM_028692844.1	LOC114579126	172	19308.8	5.53	47.77	77.15	-0.528
XM_028693403.1	XM_028693403.1	LOC110103331	635	70387.6	4.68	47.54	79.42	-0.449
XM_028695344.1	XM_028695344.1	LOC110092208	205	23183.1	8.74	55.51	55.76	-0.666
XM_028695447.1	XM_028695447.1	LOC110102585	382	43157.8	5.6	48.67	74.29	-0.632
XM_028695821.1	XM_028695821.1	LOC110104089	280	32508.6	5.68	29.04	56.39	-0.713
XM_028696035.1	XM_028696035.1	LOC110107355	274	30682.9	8.2	45.73	65.95	-0.592
XM_028696630.1	DcNAC76	LOC110116691	357	39797.4	6.43	44.73	63.92	-0.579
XM_028696846.1	XM_028696846.1	LOC110107849	336	38092.2	6.15	31.38	64.76	-0.539
XM_028697844.1	XM_028697844.1	LOC110114310	221	25274.1	9.07	61.3	80.77	-0.484
XM_028697910.1	XM_028697910.1	LOC110116424	313	36689.1	6.49	43.42	61.66	-0.918
XM_028698290.1	XM_028698290.1	LOC110105590	386	43352.7	4.73	50.94	58.34	-0.68
XM_028698689.1	XM_028698689.1	LOC110105421	380	43057.8	7.67	47.95	75.74	-0.556
XM_028699778.1	XM_028699778.1	LOC110104614	163	19308	9.24	33.12	64.66	-0.75
