# Supplementary material for: Whole-Transcriptome Sequencing Reveals the Global Molecular Responses and NAC Transcription Factors Involved in Drought Stress in Dendrobium catenatum
Source: Antioxidants (Basel). 2024 Jan 12;13(1):94. doi: 10.3390/antiox13010094 (PMC10812421; doi:10.3390/antiox13010094)
Supplement: Supplementary file 1 [file antioxidants-13-00094-s001.zip › Table S3-RT-qPCR primer list of DEDcNAC.xlsx]

## Sheet: Sheet1
DcNAC10_1_F	AGAGCACCGACTCCTCGT
DcNAC10_1_R	TGGTGACGGGGAGAGGAG
DcNAC104L_1_F	CCACTTCCTCCCCTCCGA
DcNAC104L_1_R	TGCTGGGATGGAAGGGGA
DcNAC2.1_1_F	TGCCCCCATCATACCCCA
DcNAC2.1_1_R	ATTTGCGGTCACGAGGGG
DcNAC2.2_1_F	GGCGACTGGAACGGACAA
DcNAC2.2_1_R	GCGGCTTGCCCATGTAGA
DcNAC2_1_F	CCGACCGACGATGAGCTC
DcNAC2_1_R	GCTGCCATGGGTCGAACT
DcNAC22.1_1_F	AACGCGGGTTCTGGAAGG
DcNAC22.1_1_R	TCTTGCTGCCACGTGGAG
DcNAC22_1_F	GGATCTCCCAGCGATGGC
DcNAC22_1_R	ACCCTCTCTCCGTGGTCC
DcNAC29.1_1_F	AAGGCTCTGTTCGGCGAC
DcNAC29.1_1_R	CGGTCGCCTTCCAGTACC
DcNAC29_1_F	GTCAACCTCCGCCGTTCA
DcNAC29_1_R	CTGGGCATGGGGACGAAG
DcNAC2L_1_F	TGCCCCCATCATACCCCA
DcNAC2L_1_R	ATTTGCGGTCACGAGGGG
DcNAC30_1_F	TCCTGTGTCCCACCAGGT
DcNAC30_1_R	TgtTGGAGCTCCCATGGC
DcNAC32_1_F	ACCGCAAGTACCCCAACG
DcNAC32_1_R	TCGGTTTGTCGGTTCCGG
DcNAC35_1_F	ACTGGCAGCGATAGGGGA
DcNAC35_1_R	TCCGGTCGCCTTCCAGTA
DcNAC43_1_F	TACCCATCCGCCACTGGA
DcNAC43_1_R	ACATGGCTGACGTGGTCG
DcNAC53_1_F	AATGCTGCGCAGGACTGT
DcNAC53_1_R	GGCTGCAGTGCTCCGTAT
DcNAC68.1_1_F	TTGGGTGCTGTGCCGATT
DcNAC68.1_1_R	CCGGCGTCCTGAAACTGT
DcNAC68.2_1_F	GGAGATGCAGGTGGAGGC
DcNAC68.2_1_R	ATCAACCACCGGCACCTG
DcNAC68_1_F	ATGGAGGCGGTGGAGGAT
DcNAC68_1_R	TTCCCACAAGACGTCCGC
DcNAC7_1_F	ACCTGCAGTGACCATCAAGG
DcNAC7_1_R	GCATTGCAGGTGATGGCG
DcNAC71.1_1_F	CAAGCCCACTGCACTCCA
DcNAC71.1_1_R	TCATCGCCGCTTGCTTGA
DcNAC71_1_F	TCCGAACGGTTCTCGCAC
DcNAC71_1_R	GGAGCTCTTCCCCGGTAGA
DcNAC73.1_1_F	TCTTGTGGGCATCGCGTT
DcNAC73.1_1_R	AACTTAACTCCGGCCGGC
DcNAC73_1_F	ACCCCTCCATGCCTCTGT
DcNAC73_1_R	TTCACTCCAGCTGGCAGC
DcNAC76_1_F	CGCTTCCACCCCACAGAG
DcNAC76_1_R	CGTCGCGGATAACGTCGA
DcNAC78_1_F	CGATCCGGGTTGATGCGA
DcNAC78_1_R	CCAAGTCGCGGCTTCTGA
DcNAC83L_1_F	GCTCGGAGCTTTACGGCT
DcNAC83L_1_R	TTCGGGGATTATGGCGGC
DcNAC86L_1_F	TGGCTCTTCCTCCTGGCT
DcNAC86L_1_R	TCAGGCAGTTCCCAGGGT
DcNAC87.1_1_F	ATGACTGCGAGCCTTGGG
DcNAC87.1_1_R	TTGTGGCCCGATTGGTCC
DcNAC87.2_1_F	CCCTTCACCTACTTCCTGGC
DcNAC87.2_1_R	CCCATGGCTCGCACTCAT
DcNAC87_1_F	ATTGCAAGGCCGAGCAGT
DcNAC87_1_R	TCGCGAGGTCGATTACGC
DcNAC92.1_1_F	ACCAGCTTCACGATGCCC
DcNAC92.1_1_R	GTGACCGCGACGACTGAA
DcNAC92_1_F	GTCACGTGCCCTGCTTCT
DcNAC92_1_R	GAGAGCGGTGGACATGGG
