# Supplementary material for: Whole-Transcriptome Sequencing Reveals the Global Molecular Responses and NAC Transcription Factors Involved in Drought Stress in Dendrobium catenatum
Source: Antioxidants (Basel). 2024 Jan 12;13(1):94. doi: 10.3390/antiox13010094 (PMC10812421; doi:10.3390/antiox13010094)
Supplement: Supplementary file 1 [file antioxidants-13-00094-s001.zip › Table S4-lncRNA list.xlsx]

## Sheet: Sheet1
id	baseMean	baseMean_control_leaf_ck	baseMean_case_leaf_drought	foldChange	log2FoldChange	pval	padj	up_down	fpkm_leaf_ck1	fpkm_leaf_ck2	fpkm_leaf_ck3	fpkm_leaf_drought1	fpkm_leaf_drought2	fpkm_leaf_drought3	length	gene_id	gene_symbol	description
TCONS_00000002	126707	194067	59347.1	0.305807	-1.70931	0	0	Down	3025.43	2966.52	3000.89	1105.9	1104.79	1123.02	2439	XLOC_000001	-	-
TCONS_00000009	5887.49	9124.48	2650.49	0.290482	-1.78348	3.72076e-86	1.17576e-84	Down	356.733	351.251	361.73	139.929	94.2169	141.946	964	XLOC_000004	-	-
TCONS_00000010	2697.44	4439.48	955.394	0.215204	-2.21622	3.15681e-106	1.0769e-104	Down	175.156	164.827	179.926	54.0698	34.0857	47.266	965	XLOC_000004	-	-
TCONS_00000017	7800.46	11264.1	4336.84	0.385015	-1.37701	2.38409e-96	7.77938e-95	Down	1028.09	1039.41	956.941	479.299	475.284	456.816	421	XLOC_000005	-	-
TCONS_00000071	152648	229810	75485	0.328467	-1.60618	1.59905e-292	1.33343e-290	Down	5157.02	5090.14	5139.77	2009.95	2013.57	2103.25	1688	XLOC_000008	-	-
TCONS_00000092	44773.6	73141.1	16406.1	0.224307	-2.15645	0	0	Down	9866.65	9550.49	9792.6	2715.18	2605.18	2621.12	283	XLOC_000020	-	-
TCONS_00000172	255.213	136.385	374.041	2.74255	1.45552	3.60595e-07	2.33299e-06	Up	21.2521	22.7656	20.1626	69.6741	71.8417	72.0241	240	XLOC_000065	-	-
TCONS_00000266	54.4126	20.754	88.0712	4.24357	2.08528	0.0010592	0.00418382	Up	3.09914	3.47864	2.93128	22.2094	11.0903	15.1801	248	XLOC_000121	-	-
TCONS_00000300	60.548	27.0553	94.0407	3.47587	1.79737	0.0020767	0.00780257	Up	2.97091	8.61543	2.30423	21.4121	21.1507	15.909	220	XLOC_000143	-	-
TCONS_00000341	26.0751	0	52.1502	Inf	Inf	4.00785e-08	2.85786e-07	Up	1.21623e-09	0.00039565	0.00329507	11.2369	7.29103	10.8972	244	XLOC_000166	-	-
TCONS_00000421	128.735	33.3184	224.152	6.72757	2.75009	9.26889e-11	8.06528e-10	Up	3.16674	4.88636	3.10755	32.4488	30.6405	27.5519	339	XLOC_000208	-	-
TCONS_00000557	9.13914	0.335385	17.9429	53.4995	5.74145	0.00987769	0.0312464	Up	0.0331943	0	0.0155408	0.632596	0.555394	1.39322	946	XLOC_000296	-	-
TCONS_00000558	15.6541	0.710375	30.5979	43.0729	5.42871	0.000513257	0.00215496	Up	0.0275226	0.0316023	0.0140788	1.23607	1.57081	1.24735	1028	XLOC_000296	-	-
TCONS_00000559	10.3955	0	20.7911	Inf	Inf	0.0100963	0.0318373	Up	0	0	0	7.30414	2.76798	0.353928	275	XLOC_000296	-	-
TCONS_00000566	131.574	0	263.148	Inf	Inf	1.99172e-38	3.93365e-37	Up	3.98802e-21	8.55541e-19	4.94366e-15	37.5316	42.2268	44.6281	290	XLOC_000300	-	-
TCONS_00000624	13.2353	0	26.4707	Inf	Inf	0.000208853	0.000938588	Up	0	0	0	2.47357	2.29733	3.57219	433	XLOC_000341	-	-
TCONS_00000659	502.548	0	1005.1	Inf	Inf	4.28033e-45	8.9857e-44	Up	5.05336e-23	1.67212e-21	6.53834e-20	154.423	260.388	251.633	207	XLOC_000369	-	-
TCONS_00000743	6.77647	13.5529	0	0	#NAME?	0.011741	0.0360394	Down	1.94307	2.14299e-20	1.18564	5.99263e-16	2.33506e-17	4.39515e-11	481	XLOC_000427	-	-
TCONS_00000764	81.3714	22.0515	140.691	6.38013	2.67359	7.06696e-07	4.42902e-06	Up	0.012022	0.00923171	3.62939	11.121	9.79303	7.58182	677	XLOC_000441	-	-
TCONS_00000825	37.5731	55.8471	19.2991	0.34557	-1.53295	0.0453359	0.118346	Down	5.45024	5.37999	4.2508	3.53207	2.58316	0.244016	417	XLOC_000474	-	-
TCONS_00000879	118.802	71.4054	166.199	2.32754	1.21881	0.00324179	0.0115856	Up	5.6322	8.00652	5.72691	17.7377	15.4388	21.5545	416	XLOC_000502	-	-
TCONS_00000917	38.4197	13.6928	63.1465	4.61165	2.20528	0.00411562	0.0142013	Up	1.47444	1.65661	1.88421	8.00752	10.457	9.81141	307	XLOC_000527	-	-
TCONS_00000919	658.821	184.282	1133.36	6.15015	2.62062	1.40324e-18	1.71939e-17	Up	19.3201	34.3564	10.4479	172.956	177.603	127.369	325	XLOC_000529	-	-
TCONS_00001029	42.6778	78.67	6.68554	0.084982	-3.5567	5.08679e-06	2.93101e-05	Down	6.94236	5.13244	10.28	0	2.03556	0.295768	397	XLOC_000585	-	-
TCONS_00001215	124.543	172.092	76.9936	0.447397	-1.16037	0.00429684	0.0147587	Down	23.4372	21.6189	29.4158	13.1988	19.0798	8.20003	261	XLOC_000699	-	-
TCONS_00001222	35.8167	12.5858	59.0477	4.69161	2.23008	0.0134504	0.0406297	Up	3.05783	2.02182	0.651956	14.0721	15.6076	3.61293	243	XLOC_000703	-	-
TCONS_00001280	10.835	0	21.6699	Inf	Inf	0.00537489	0.0180688	Up	2.88985e-28	4.6372e-41	3.50681e-34	8.0321	4.60018	0.00114711	234	XLOC_000746	-	-
TCONS_00001580	55.6604	102.593	8.72755	0.0850694	-3.55522	1.99553e-07	1.33421e-06	Down	18.8966	15.8715	13.2298	3.18555	1.70552	0	242	XLOC_000925	-	-
TCONS_00001649	12.8056	0	25.6112	Inf	Inf	0.000271545	0.00119352	Up	0	0	0	5.8144	4.91267	3.54532	244	XLOC_000966	-	-
TCONS_00001651	12.8056	0	25.6112	Inf	Inf	0.000271545	0.00119352	Up	0	0	0	5.8144	4.91267	3.54532	244	XLOC_000966	-	-
TCONS_00001765	29.2551	4.49988	54.0104	12.0026	3.58528	0.000141963	0.000656661	Up	0	1.99434	0	6.2443	11.5051	10.0413	266	XLOC_001041	-	-
TCONS_00001836	160.371	88.0873	232.655	2.64119	1.40119	0.00011654	0.000549219	Up	8.66163	5.62047	7.09481	21.8119	20.9407	25.7833	465	XLOC_001082	-	-
TCONS_00001872	141152	205686	76617.5	0.372496	-1.4247	1.22362e-231	7.81557e-230	Down	21124.5	20840.2	21893.9	9412.9	9730.38	9698.72	364	XLOC_001108	-	-
TCONS_00001927	112.201	192.704	31.6985	0.164493	-2.6039	0.00501987	0.0169703	Down	37.8283	11.2599	46.5609	7.08596	11.1885	0.709845	228	XLOC_001142	-	-
TCONS_00001954	18.8142	0.335385	37.293	111.195	6.79694	2.60377e-05	0.000135001	Up	0.0785632	8.82242e-05	3.05184e-20	4.69758	4.11208	3.73047	404	XLOC_001158	-	-
TCONS_00002073	20286.8	2952.99	37620.6	12.7398	3.67127	9.14609e-284	7.22541e-282	Up	235.927	234.567	232.113	3595.54	3437.26	3816.22	475	XLOC_001243	-	-
TCONS_00002075	11.562	23.124	0	0	#NAME?	0.000427635	0.00182352	Down	2.25158	0.991494	5.00333	7.7006e-20	0	1.38984e-22	314	XLOC_001244	-	-
TCONS_00002137	827.886	350.193	1305.58	3.72817	1.89847	2.54252e-17	2.9815e-16	Up	53.9204	50.8188	59.5967	260.994	280.03	201.433	241	XLOC_001280	-	-
TCONS_00002342	20.2042	35.7519	4.65657	0.130247	-2.94068	0.0076738	0.0249586	Down	5.68398	3.03452	3.14802	0.725965	0.000497443	1.09718	341	XLOC_001409	-	-
TCONS_00002391	139.853	77.9584	201.747	2.58788	1.37177	0.03651	0.0978511	Up	12.0381	7.47999	8.08099	13.5309	30.5018	42.8755	319	XLOC_001441	-	-
TCONS_00002428	69.5981	95.1264	44.0698	0.463276	-1.11006	0.0409681	0.108273	Down	17.6312	11.0433	8.77741	9.56713	7.45501	3.86503	288	XLOC_001469	-	-
TCONS_00002459	5.97024	0	11.9405	Inf	Inf	0.0259174	0.0726462	Up	1.91645e-27	5.33224e-29	4.93911e-28	1.12284	2.04906	1.4062	356	XLOC_001484	-	-
TCONS_00002461	45.673	0.689109	90.6569	131.557	7.03954	6.08611e-12	5.55335e-11	Up	0.00185759	0.000112701	0.13724	4.48135	8.26893	8.18427	595	XLOC_001484	-	-
TCONS_00002469	359.931	147.698	572.163	3.87386	1.95377	3.76712e-15	4.01025e-14	Up	15.4446	9.70145	16.982	64.352	63.099	70.4662	396	XLOC_001483	-	-
TCONS_00002602	28.6163	47.2873	9.94525	0.210316	-2.24937	0.0255066	0.0716285	Down	3.67996	2.97822	8.97454	1.35907	2.65181	0	341	XLOC_001558	-	-
TCONS_00002603	127.168	170.451	83.8843	0.49213	-1.02289	0.0107255	0.0333658	Down	12.6939	15.447	17.8007	9.17205	9.42643	8.92188	419	XLOC_001559	-	-
TCONS_00002629	1264.45	1929.48	599.416	0.310662	-1.68658	8.64156e-25	1.28426e-23	Down	178.523	193.374	188.743	99.3355	60.1775	51.2007	389	XLOC_001576	-	-
TCONS_00002865	44.1947	88.3895	0	0	#NAME?	5.57162e-14	5.59398e-13	Down	16.0818	8.15282	12.4868	0	0	1.53054e-26	272	XLOC_001705	-	-
TCONS_00002918	186.324	78.2078	294.439	3.76484	1.91259	1.74884e-08	1.27119e-07	Up	9.94441	11.6615	9.19763	46.6438	49.0503	44.8918	287	XLOC_001737	-	-
TCONS_00003035	25.9951	6.37211	45.6182	7.15904	2.83977	0.00356405	0.012632	Up	1.31076	1.44108	0.335362	7.23796	6.81606	11.8227	241	XLOC_001811	-	-
TCONS_00003057	192.126	0	384.253	Inf	Inf	1.05531e-55	2.57565e-54	Up	4.66353e-24	1.2037e-25	3.15255e-26	79.8305	71.9811	59.5132	249	XLOC_001821	-	-
TCONS_00003133	3043.18	4094.7	1991.66	0.486399	-1.03979	1.00255e-29	1.67203e-28	Down	610.248	570.713	605.745	400.447	350.498	302.083	259	XLOC_001877	-	-
TCONS_00003189	76.5796	133.973	19.186	0.143208	-2.80381	4.07281e-07	2.62373e-06	Down	9.56068	7.73402	7.09241	1.29793	2.05869	0.905137	620	XLOC_001910	-	-
TCONS_00003190	135.259	201.986	68.5313	0.339287	-1.55942	6.85556e-05	0.000337383	Down	20.3433	20.6545	23.1844	11.3637	4.09945	10.8629	355	XLOC_001909	-	-
TCONS_00003282	228.058	21.3905	434.726	20.3234	4.34507	2.5533e-34	4.50882e-33	Up	4.41451	5.6684	0.0664286	69.2714	89.6221	90.3497	239	XLOC_001962	-	-
TCONS_00003284	228.058	21.3905	434.726	20.3234	4.34507	2.5533e-34	4.50882e-33	Up	4.41451	5.6684	0.0664286	69.2714	89.6221	90.3497	239	XLOC_001962	-	-
TCONS_00003615	837.446	0	1674.89	Inf	Inf	2.7648e-231	1.72915e-229	Up	0	0	0	314.985	287.669	326.013	247	XLOC_002136	-	-
TCONS_00003772	141.624	194.603	88.6447	0.455515	-1.13443	0.00305243	0.0109479	Down	29.2324	37.1222	31.2304	22.1983	15.5301	16.2206	225	XLOC_002230	-	-
TCONS_00003798	35.5527	58.5116	12.5938	0.215236	-2.21601	0.00549032	0.0184156	Down	6.15685	7.06637	4.86372	0.790624	2.18188	1.82835	365	XLOC_002246	-	-
TCONS_00003837	304.199	0	608.398	Inf	Inf	2.47421e-20	3.20155e-19	Up	0	0	0	106.335	98.3667	193.891	209	XLOC_002268	-	-
TCONS_00004131	175.506	102.875	248.137	2.41203	1.27025	0.000692477	0.00282448	Up	9.06166	17.2979	6.39112	27.8919	40.8967	27.1004	355	XLOC_002449	-	-
TCONS_00004140	10.8778	0	21.7557	Inf	Inf	0.000992635	0.00394515	Up	0	0	0	2.93909	5.15545	4.09255	247	XLOC_002453	-	-
TCONS_00004285	114.4	68.0292	160.772	2.36327	1.24079	0.0105114	0.0328702	Up	18.8843	3.15421	11.1455	24.1969	40.5212	30.7331	231	XLOC_002528	-	-
TCONS_00004406	179.882	353.447	6.31702	0.0178726	-5.80611	3.4543e-06	2.0333e-05	Down	22.8417	83.0867	47.5665	2.56988	0.88122	0	260	XLOC_002611	-	-
TCONS_00004476	1735.71	2586.49	884.92	0.342131	-1.54738	3.52393e-27	5.53866e-26	Down	316.405	343.96	285.97	126.163	160.571	106.169	309	XLOC_002649	-	-
TCONS_00004546	27.8194	53.5353	2.10349	0.0392917	-4.66963	0.00585655	0.0194269	Down	6.06159	2.77546	15.8839	1.10326	0.0803094	0.0138423	244	XLOC_002698	-	-
TCONS_00004766	402.818	0	805.635	Inf	Inf	7.70597e-81	2.36054e-79	Up	0.00161116	2.85597e-07	0.00177775	158.822	169.621	120.451	246	XLOC_002826	-	-
TCONS_00004788	628.497	995.792	261.201	0.262305	-1.93068	9.98457e-25	1.47654e-23	Down	117.099	116.589	120.234	47.9601	31.6675	32.6194	318	XLOC_002842	-	-
TCONS_00004789	904.792	1364.67	444.918	0.326027	-1.61693	4.65252e-25	6.98343e-24	Down	175.931	158.397	150.884	73.9939	58.9885	58.553	318	XLOC_002842	-	-
TCONS_00004790	17470.3	26541	8399.57	0.316475	-1.65983	9.10984e-203	5.25918e-201	Down	3144.73	3198.75	3089.86	1278.54	1156.23	1182.77	318	XLOC_002842	-	-
TCONS_00004791	5423.46	8474.7	2372.23	0.279919	-1.83692	1.29128e-131	5.31017e-130	Down	1022.14	969.031	1011.28	384.247	321.503	312.478	319	XLOC_002842	-	-
TCONS_00004865	24.7224	10.4	39.0448	3.7543	1.90854	0.0486962	0.125374	Up	1.19637	0.66487	1.02302	4.74971	2.86777	5.34674	413	XLOC_002888	-	-
TCONS_00004869	303.718	475.075	132.361	0.278611	-1.84367	4.24792e-12	3.92377e-11	Down	69.3117	81.6523	75.5693	22.7809	24.1278	29.4787	237	XLOC_002891	-	-
TCONS_00005022	37.6819	7.43348	67.9304	9.13844	3.19195	0.000124842	0.000583764	Up	1.18313	1.49765e-05	0.447653	4.9994	5.99549	7.31232	508	XLOC_002968	-	-
TCONS_00005112	38.6834	60.3077	17.059	0.282866	-1.82181	0.016064	0.0475113	Down	6.58295	8.70707	7.62117	4.18343	1.71491	1.95429	297	XLOC_003026	-	-
TCONS_00005220	47.7589	8.16199	87.3559	10.7028	3.41991	3.07296e-06	1.81595e-05	Up	0.45451	1.2855	1.27319	11.2935	14.8905	13.678	301	XLOC_003079	-	-
TCONS_00005316	376.813	246.856	506.769	2.05289	1.03766	8.32326e-06	4.66164e-05	Up	23.0438	27.635	23.9943	59.8356	62.6796	63.0935	374	XLOC_003146	-	-
TCONS_00005472	44312.1	59495.8	29128.5	0.489588	-1.03036	4.26858e-107	1.49003e-105	Down	5463.7	5417.29	5479.48	3232.09	3311.22	3167.78	411	XLOC_003246	-	-
TCONS_00005541	16588.1	28896.1	4280.03	0.148118	-2.75519	0	0	Down	1738.49	1694.54	1800.19	318.112	286.304	334.883	624	XLOC_003293	-	-
TCONS_00005556	33.5103	0	67.0206	Inf	Inf	2.88771e-10	2.42827e-09	Up	0	0	0	14.7434	10.7097	17.7433	212	XLOC_003302	-	-
TCONS_00005590	40.9881	71.1641	10.8122	0.151933	-2.7185	0.000356648	0.00153389	Down	3.44308	6.50373	3.741	0.590838	0.736226	1.26786	585	XLOC_003330	-	-
TCONS_00005599	247.688	163.626	331.751	2.0275	1.0197	0.000321973	0.00139274	Up	11.7445	18.2713	12.783	36.591	33.02	35.5371	432	XLOC_003335	-	-
TCONS_00005608	27.1955	7.12481	47.2661	6.63402	2.72988	0.00292848	0.0105538	Up	6.18847e-14	3.93161	5.62384e-19	12.2226	12.0014	7.92852	201	XLOC_003341	-	-
TCONS_00005713	991.645	616.469	1366.82	2.21718	1.14872	0.0115908	0.0356753	Up	70.1936	117.353	158.76	411.843	202.956	314.394	201	XLOC_003408	-	-
TCONS_00005858	47.7244	88.1144	7.33447	0.0832381	-3.58661	1.20598e-06	7.38849e-06	Down	15.0111	16.1049	17.2759	2.43188	1.04799	1.43685	206	XLOC_003494	-	-
TCONS_00005936	220.451	334.889	106.014	0.316563	-1.65944	7.34483e-08	5.09219e-07	Down	30.6749	30.3303	31.7603	11.7581	9.58897	14.2623	408	XLOC_003539	-	-
TCONS_00006149	678.227	304.203	1052.25	3.45904	1.79037	3.35982e-23	4.73529e-22	Up	43.5631	47.7264	41.1283	182.166	179.103	193.186	260	XLOC_003686	-	-
TCONS_00006269	22.0201	0	44.0401	Inf	Inf	5.71479e-07	3.64242e-06	Up	3.05645e-10	1.20495e-20	4.44347e-11	14.5676	7.82318	4.91041	222	XLOC_003769	-	-
TCONS_00006323	76.0161	28.2868	123.745	4.37467	2.12917	0.000146958	0.000678138	Up	3.65371	5.61759	0.148692	19.6717	10.2319	19.2922	343	XLOC_003806	-	-
TCONS_00006366	7.61034	15.2207	0	0	#NAME?	0.0111955	0.0346483	Down	4.13136	1.31979e-05	1.85162	3.37994e-10	0.00311267	7.24663e-18	285	XLOC_003831	-	-
TCONS_00006384	204.371	79.7473	328.995	4.12546	2.04456	3.79668e-10	3.13121e-09	Up	5.29948	6.72806	5.00822	24.688	27.2976	33.2567	529	XLOC_003839	-	-
TCONS_00006489	7.08726	14.1745	0	0	#NAME?	0.0102235	0.0322044	Down	0.92571	2.26219	2.58024	0	0	0	276	XLOC_003894	-	-
TCONS_00006660	21.4182	4.13465	38.7018	9.36034	3.22656	0.00373124	0.0131469	Up	0	0	1.85954	6.93813	9.54871	4.93132	249	XLOC_004011	-	-
TCONS_00006743	5.173	0	10.346	Inf	Inf	0.0436857	0.114337	Up	0	0	3.85497e-23	3.06798	1.85319	1.42906	221	XLOC_004063	-	-
TCONS_00006758	14.1604	0	28.3209	Inf	Inf	0.000109612	0.000520657	Up	8.96296e-19	4.35852e-21	6.70344e-18	2.62257	2.23033	1.37705	621	XLOC_004070	-	-
TCONS_00006841	346.995	595.793	98.1978	0.164819	-2.60105	1.77487e-20	2.34721e-19	Down	126.913	90.2869	114.467	31.8401	12.7691	21.2823	203	XLOC_004117	-	-
TCONS_00006851	31.8568	56.6948	7.01871	0.123798	-3.01394	0.000607681	0.00251275	Down	11.661	9.53275	8.1102	2.06154	1.16831	1.15269	218	XLOC_004122	-	-
TCONS_00007386	190437	287576	93298.3	0.32443	-1.62402	2.91738e-135	1.23352e-133	Down	53012	48501.3	50372.7	20460.7	18233.5	21009.8	214	XLOC_004463	-	-
TCONS_00007387	606.849	984.349	229.349	0.232995	-2.10163	3.44922e-22	4.77169e-21	Down	173.921	162.357	211.576	43.8036	48.2858	62.8954	203	XLOC_004463	-	-
TCONS_00007556	1486.15	2093.59	878.711	0.419715	-1.25252	2.14172e-16	2.39905e-15	Down	344.252	429.628	403.082	181.125	233.324	185.244	201	XLOC_004544	-	-
TCONS_00007582	8.84789	17.6958	0	0	#NAME?	0.00288641	0.0104272	Down	5.7509	2.77942	0.744723	0	0	0	221	XLOC_004558	-	-
TCONS_00007720	1193.59	1948.65	438.533	0.225045	-2.15171	9.56738e-53	2.24385e-51	Down	254.202	279.421	284.91	70.9037	79.0037	73.6226	269	XLOC_004631	-	-
TCONS_00007789	400.236	591.337	209.136	0.353666	-1.49954	1.52096e-07	1.02836e-06	Down	62.3373	73.9781	56.4086	42.9318	20.735	18.6478	347	XLOC_004669	-	-
TCONS_00007837	235.944	362.836	109.053	0.300558	-1.73429	7.51721e-09	5.64167e-08	Down	38.706	42.1845	43.3273	16.5895	13.3776	15.391	330	XLOC_004698	-	-
TCONS_00007891	73.9416	18.562	129.321	6.96697	2.80053	7.7309e-07	4.80501e-06	Up	1.63115	1.6164	1.98512	16.1399	12.6405	15.4165	401	XLOC_004734	-	-
TCONS_00008005	13.3556	24.8916	1.81956	0.0730992	-3.774	0.01072	0.0333658	Down	3.38788	3.54595	4.09707	0.769857	0	0.197328	255	XLOC_004797	-	-
TCONS_00008008	8645.97	1678.04	15613.9	9.30486	3.21798	0	0	Up	247.042	244.742	240.448	2671.77	2740.29	2848.01	259	XLOC_004800	-	-
TCONS_00008019	34.0089	62.1718	5.84592	0.0940286	-3.41076	0.0140877	0.0421228	Down	10.2555	1.7274	4.5309	0.77551	0.258217	0.857038	426	XLOC_004808	-	-
TCONS_00008032	22.4157	44.8315	0	0	#NAME?	2.33892e-07	1.55686e-06	Down	6.01911	5.18912	4.75939	0	0	0	316	XLOC_004813	-	-
TCONS_00008057	5.72583	11.4517	0	0	#NAME?	0.0253982	0.0713909	Down	1.23163	0.596312	0.181964	5.10789e-12	1.0684e-09	1.91221e-08	635	XLOC_004825	-	-
TCONS_00008066	32.1394	56.128	8.15082	0.145218	-2.7837	0.0413191	0.108991	Down	0.434988	8.19849	9.31747	0.0908104	0.580726	2.48567	354	XLOC_004828	-	-
TCONS_00008178	8761.69	14451.9	3071.45	0.212529	-2.23427	3.55393e-09	2.74971e-08	Down	1330.78	1073.19	1780.61	368.751	330.769	378.93	390	XLOC_004895	-	-
TCONS_00008179	298493	459012	137975	0.300591	-1.73413	0	0	Down	41436.8	42350.6	40330.9	15267.9	15316.2	14641.2	418	XLOC_004895	-	-
TCONS_00008318	103110	150262	55958.4	0.372406	-1.42505	5.47732e-226	3.35569e-224	Down	21541.3	20772.1	21768.6	9357.27	9550.91	10024.6	265	XLOC_004970	-	-
TCONS_00008360	36.8958	0	73.7916	Inf	Inf	0.000645545	0.00264383	Up	1.68832e-23	1.02756e-21	8.19732e-27	1.98406e-08	23.3985	14.3498	270	XLOC_004999	-	-
TCONS_00008397	41.835	13.0921	70.5779	5.39088	2.43052	0.00100812	0.00399257	Up	1.7602	2.92826	2.60492	22.7242	11.0051	14.2721	201	XLOC_005025	-	-
TCONS_00008556	4262.31	6660	1864.62	0.279973	-1.83664	4.30674e-19	5.40955e-18	Down	1064.51	1108.94	1374.9	382.545	463.831	359.527	212	XLOC_005120	-	-
TCONS_00008557	126762	42122.6	211402	5.01872	2.32732	0	0	Up	7912.88	7842.01	7138.35	47046.5	46803.1	45398	208	XLOC_005120	-	-
TCONS_00008590	19.3413	32.8952	5.78752	0.175938	-2.50686	0.0248063	0.069858	Down	3.51941	3.2086	4.18879	0.725067	1.0523	0.529193	339	XLOC_005140	-	-
TCONS_00008675	377.637	529.835	225.439	0.42549	-1.2328	0.000331125	0.00142821	Down	47.788	58.031	36.606	31.3363	29.0778	13.0218	421	XLOC_005197	-	-
TCONS_00008727	109.894	153.936	65.8532	0.427797	-1.225	0.00454421	0.0154843	Down	16.6566	17.8053	22.5585	10.592	9.02092	10.0134	305	XLOC_005231	-	-
TCONS_00008731	39.3498	73.7487	4.95097	0.067133	-3.89683	1.4239e-05	7.67425e-05	Down	16.5126	5.71071	11.3111	0	1.35657	1.38275	249	XLOC_005233	-	-
TCONS_00008784	2496.03	863.636	4128.42	4.78028	2.25709	1.79789e-51	4.12005e-50	Up	99.0728	120.52	123.942	619.004	749.522	624.755	284	XLOC_005266	-	-
TCONS_00008817	87.7913	175.583	0	0	#NAME?	5.18461e-27	8.06435e-26	Down	14.8511	16.6816	18.7425	0	0	0	395	XLOC_005284	-	-
TCONS_00008916	764.01	19.1245	1508.9	78.8986	6.30193	1.04893e-162	4.92016e-161	Up	6.65955e-16	6.36575	0.000783723	214.258	207.572	191.618	337	XLOC_005340	-	-
TCONS_00008928	254.969	79.7657	430.171	5.39294	2.43107	3.35655e-16	3.73198e-15	Up	6.50866	8.43645	6.41726	43.0811	46.7892	49.1065	424	XLOC_005344	-	-
TCONS_00008930	225.901	73.992	377.811	5.10611	2.35222	9.31532e-14	9.2598e-13	Up	6.71058	7.0777	8.78414	46.1828	50.1939	43.1186	371	XLOC_005344	-	-
TCONS_00009107	4030.07	7945.42	114.718	0.0144383	-6.11396	0	0	Down	1198.5	1211.19	1255.28	19.6332	7.11142	37.2048	245	XLOC_005457	-	-
TCONS_00009108	218.356	436.713	0	0	#NAME?	7.09759e-54	1.69103e-52	Down	39.8326	52.5588	35.4494	3.6818e-19	7.59437e-20	9.83735e-38	386	XLOC_005457	-	-
TCONS_00009109	432.231	852.576	11.8867	0.0139421	-6.16441	7.69759e-20	9.83327e-19	Down	69.039	133.757	102.989	0.963647	0.375308	3.88343	315	XLOC_005457	-	-
TCONS_00009110	828.548	1593.5	63.5937	0.0399081	-4.64717	1.43142e-36	2.63626e-35	Down	188.1	131.481	183.484	7.57922	16.7847	1.55292e-06	358	XLOC_005457	-	-
TCONS_00009111	53.3205	106.641	0	0	#NAME?	5.41342e-09	4.10381e-08	Down	21.2744	6.31145	12.4714	1.79826e-18	2.21836e-18	6.11246e-16	300	XLOC_005457	-	-
TCONS_00009199	23.2813	7.45455	39.1081	5.2462	2.39127	0.0175256	0.0512288	Up	0.472047	0.782689	0.482107	1.79789	4.18225	4.45419	513	XLOC_005504	-	-
TCONS_00009251	39.8062	79.6123	0	0	#NAME?	6.29528e-11	5.54206e-10	Down	12.1862	11.6339	4.33795	1.00526e-06	8.73541e-09	0.0269592	320	XLOC_005536	-	-
TCONS_00009381	56.0912	112.182	0	0	#NAME?	2.3641e-05	0.000123427	Down	5.42349	11.7637	29.3462	1.33955e-18	7.98017e-10	1.1642e-22	271	XLOC_005613	-	-
TCONS_00009489	2394.69	3930.14	859.243	0.218629	-2.19344	5.90184e-07	3.75367e-06	Down	180.497	283.437	325.627	35.8839	99.2719	75.0531	562	XLOC_005681	-	-
TCONS_00009490	1888.7	2816.26	961.144	0.341284	-1.55096	0.000242265	0.00107427	Down	255.997	181.179	138.023	108.658	52.4431	75.9364	554	XLOC_005681	-	-
TCONS_00009529	27179.4	38039	16319.8	0.429029	-1.22085	1.34884e-131	5.47192e-130	Down	2528.64	2606.56	2583.06	1322.83	1347.81	1343.97	557	XLOC_005702	-	-
TCONS_00009552	38.2691	0	76.5383	Inf	Inf	0.000177223	0.000806097	Up	0.0140729	1.18024e-24	5.1903e-15	4.87796	1.84976	12.3239	548	XLOC_005714	-	-
TCONS_00009668	70.4225	120.949	19.8964	0.164503	-2.60381	4.57435e-06	2.66128e-05	Down	29.5006	16.7046	18.0394	3.88961	4.97736	4.03719	213	XLOC_005786	-	-
TCONS_00009672	326.727	53.6818	599.771	11.1727	3.48191	3.33526e-35	6.03159e-34	Up	12.6633	10.3478	4.35465	117.317	127.998	123.388	223	XLOC_005789	-	-
TCONS_00009706	104.392	163.02	45.7635	0.280723	-1.83278	5.91213e-05	0.000292875	Down	18.459	14.9549	13.6444	8.80823	7.1538	0.00807075	392	XLOC_005813	-	-
TCONS_00009763	84.9227	52.5106	117.335	2.2345	1.15995	0.0170023	0.0497961	Up	7.55768	9.9631	3.23159	16.2125	21.1146	18.7111	287	XLOC_005837	-	-
TCONS_00009767	52.7816	5.47619	100.087	18.2768	4.19194	1.59799e-08	1.17004e-07	Up	0.695516	0	2.08087	24.7562	17.0532	20.2424	221	XLOC_005841	-	-
TCONS_00009851	27.0379	6.62535	47.4505	7.16196	2.84035	0.00301594	0.0108429	Up	1.19131	0.741307	0.950862	9.34932	7.64983	8.16894	258	XLOC_005893	-	-
TCONS_00009859	92.9102	185.82	0	0	#NAME?	1.5991e-28	2.59487e-27	Down	26.2218	32.8244	33.645	0	3.06522e-19	4.76118e-09	227	XLOC_005900	-	-
TCONS_00009928	73.3391	41.5557	105.123	2.52968	1.33895	0.0144896	0.0432384	Up	4.34522	0.966337	8.96117	13.2232	12.7997	17.6714	329	XLOC_005938	-	-
TCONS_00009940	62.8611	114.057	11.6653	0.102276	-3.28946	1.72984e-07	1.16435e-06	Down	9.85877	11.2044	9.01878	1.26362	1.05701	1.41925	427	XLOC_005947	-	-
TCONS_00010014	588.556	878.349	298.762	0.340141	-1.5558	4.1744e-16	4.60719e-15	Down	125.641	129.786	127.89	52.8136	54.2981	51.0106	259	XLOC_005985	-	-
TCONS_00010015	85.1037	6.22324	163.984	26.3503	4.71975	4.95301e-09	3.78345e-08	Up	0.0831377	0.0666943	1.20013	10.6877	21.6444	11.596	513	XLOC_005986	-	-
TCONS_00010017	102.534	21.6024	183.465	8.49281	3.08624	3.5096e-10	2.91851e-09	Up	1.59034	0.298499	1.71273	14.1472	11.9169	11.4014	670	XLOC_005986	-	-
TCONS_00010042	1891.43	764.627	3018.23	3.94733	1.98088	0.00710789	0.0232439	Up	97.5882	119.756	1.07331e-12	166.131	502.871	371.284	399	XLOC_006003	-	-
TCONS_00010123	966.438	1497.25	435.63	0.290954	-1.78114	4.88302e-19	6.0825e-18	Down	252.687	196.591	211.789	75.925	58.1853	98.8107	256	XLOC_006051	-	-
TCONS_00010153	35.3188	4.46028	66.1772	14.837	3.89113	8.83722e-06	4.9311e-05	Up	0.211548	1.76596	1.58453e-14	9.59753	13.2472	11.4725	264	XLOC_006067	-	-
TCONS_00010204	32.0233	11.9821	52.0644	4.34517	2.11941	0.0116105	0.0356753	Up	1.02466	1.09858	0.514013	4.08636	5.31514	4.54193	512	XLOC_006097	-	-
TCONS_00010369	1481.7	71.8643	2891.53	40.2359	5.33041	5.96993e-107	2.05997e-105	Up	10.4227	8.53998	14.4653	538.344	618.952	480.93	242	XLOC_006187	-	-
TCONS_00010435	47.2191	9.8756	84.5626	8.56278	3.09808	1.80279e-05	9.56181e-05	Up	0.334835	0.731307	1.02953	9.06942	7.09368	6.11556	520	XLOC_006229	-	-
TCONS_00010487	81.6145	119.676	43.5527	0.363921	-1.4583	0.00398578	0.0138648	Down	18.7456	21.259	17.5093	8.90304	7.38849	9.26713	235	XLOC_006261	-	-
TCONS_00010538	608.961	950.133	267.789	0.281844	-1.82703	9.2874e-09	6.9183e-08	Down	91.5884	133.457	90.9255	39.8445	38.4172	29.5674	340	XLOC_006295	-	-
TCONS_00010551	370.201	503.054	237.349	0.471817	-1.0837	3.57571e-06	2.10064e-05	Down	65.8018	52.7648	54.3	36.6693	23.7081	38.4364	329	XLOC_006304	-	-
TCONS_00010579	58.673	16.8453	100.501	5.9661	2.57679	3.61688e-05	0.000184973	Up	0.26408	2.585	2.4846	13.6906	8.99208	15.5259	360	XLOC_006322	-	-
TCONS_00010651	138.463	191.37	85.5572	0.447078	-1.1614	0.00254922	0.0093899	Down	8.5467	10.4718	10.9345	5.47775	4.91126	5.84715	722	XLOC_006366	-	-
TCONS_00010760	101.5	48.4834	154.516	3.18699	1.67219	0.000178877	0.00081116	Up	0.0127951	10.2815	7.1672	23.3538	20.3482	24.0501	312	XLOC_006433	-	-
TCONS_00010770	19.6706	2.41188	36.9293	15.3114	3.93654	0.00128051	0.00497295	Up	1.11051e-11	1.26374e-15	0.488722	2.65533	4.15665	2.33541	556	XLOC_006443	-	-
TCONS_00010830	59.9091	86.1263	33.6919	0.391192	-1.35405	0.0219567	0.0630152	Down	17.5842	11.8782	11.1025	8.7655	7.40613	3.09921	240	XLOC_006480	-	-
TCONS_00010886	17.0726	32.337	1.80823	0.0559182	-4.16054	0.00175597	0.00665582	Down	4.15671	4.5645	4.46351	0.304183	0.610278	0	276	XLOC_006508	-	-
TCONS_00010963	236.843	327.148	146.538	0.447927	-1.15867	9.74433e-05	0.000465804	Down	41.5657	45.6777	31.9013	27.8248	21.558	15.0183	311	XLOC_006549	-	-
TCONS_00010979	10.179	18.8336	1.52429	0.0809347	-3.6271	0.0332082	0.0903817	Down	1.86086	1.61918	3.43512	7.66052e-07	0.482641	0.120449	308	XLOC_006559	-	-
TCONS_00011068	859.443	450.259	1268.63	2.81755	1.49444	9.4804e-21	1.2649e-19	Up	67.0263	64.7865	56.1619	204.031	214.646	222.748	271	XLOC_006617	-	-
TCONS_00011114	162.985	95.4891	230.48	2.41368	1.27124	0.000328029	0.0014169	Up	10.2081	12.4905	10.2431	29.0484	37.0134	30.5866	327	XLOC_006640	-	-
TCONS_00011163	16.6678	5.44224	27.8934	5.12535	2.35765	0.0471835	0.122318	Up	7.38406e-10	1.07616	0.664008	2.65657	4.85994	3.86184	338	XLOC_006664	-	-
TCONS_00011238	7.05338	0.335385	13.7714	41.0614	5.35971	0.0329536	0.0897703	Up	0.0339272	8.56459e-07	0.000130544	1.24671	0.92174	1.0563	590	XLOC_006717	-	-
TCONS_00011284	330.255	469.866	190.645	0.405744	-1.30136	2.26451e-07	1.51068e-06	Down	63.0459	70.6784	56.7626	28.1725	33.1003	32.2802	279	XLOC_006750	-	-
TCONS_00011299	1331.26	2520.43	142.08	0.0563711	-4.1489	4.10155e-168	2.0185e-166	Down	268.111	252.661	281.538	20.0222	18.9558	15.795	355	XLOC_006762	-	-
TCONS_00011324	7.75052	15.501	0	0	#NAME?	0.0454736	0.118603	Down	2.93593	0.00297911	0.58905	1.08855e-08	2.72881e-18	1.8561e-16	496	XLOC_006772	-	-
TCONS_00011340	494.602	168.793	820.411	4.86045	2.28109	4.31658e-26	6.54464e-25	Up	29.345	18.9462	25.9448	129.876	144.24	163.225	257	XLOC_006781	-	-
TCONS_00011346	37.5279	60.8833	14.1726	0.232783	-2.10294	0.00652839	0.0214423	Down	8.97264	12.041	6.44585	1.97487	2.25707	3.49435	252	XLOC_006785	-	-
TCONS_00011529	67.1178	16.0801	118.155	7.34792	2.87734	1.46459e-06	8.9002e-06	Up	1.42133	1.12931	1.19973	12.6429	11.2045	8.98996	494	XLOC_006894	-	-
TCONS_00011532	178.007	76.9499	279.065	3.62657	1.85861	0.000219596	0.000982457	Up	0.0012591	17.3119	25.3613	44.2642	65.558	78.7241	203	XLOC_006896	-	-
TCONS_00011566	661.776	398.66	924.892	2.32	1.21413	5.98933e-05	0.00029621	Up	81.6108	39.2838	100.748	245.912	192.42	185.291	203	XLOC_006919	-	-
TCONS_00011605	641.888	361.349	922.426	2.55273	1.35204	1.36937e-13	1.34342e-12	Up	38.0834	41.1281	49.1173	137.771	121.719	137.613	318	XLOC_006943	-	-
TCONS_00011613	610.297	171.481	1049.11	6.11795	2.61305	3.13833e-40	6.32301e-39	Up	19.5758	34.0594	33.622	222.493	191.235	233.466	222	XLOC_006943	-	-
TCONS_00011614	807.576	474.076	1141.08	2.40695	1.26721	0.000670114	0.00273698	Up	54.982	77.7667	46.4694	124.004	173.166	226.029	299	XLOC_006943	-	-
TCONS_00011707	298.158	189.509	406.806	2.14663	1.10207	0.000643447	0.00263884	Up	25.7558	37.6431	36.0754	108.459	64.8424	85.2965	215	XLOC_006990	-	-
TCONS_00011895	711.163	434.98	987.346	2.26986	1.18261	8.83879e-12	7.99219e-11	Up	51.7535	50.0271	53.8856	141.854	144.392	141.807	316	XLOC_007108	-	-
TCONS_00011945	124.093	248.185	0	0	#NAME?	2.01886e-23	2.88601e-22	Down	35.7007	47.191	23.5646	1.48493e-24	1.06082e-26	9.94945e-22	264	XLOC_007134	-	-
TCONS_00011946	89.6919	178.178	1.20592	0.00676808	-7.20704	1.71705e-23	2.47817e-22	Down	13.931	18.7876	12.317	0.11532	0.237204	9.66199e-24	447	XLOC_007134	-	-
TCONS_00011950	4654.63	9171.09	138.168	0.0150656	-6.0526	0	0	Down	807.998	772.426	807.742	18.3539	15.9811	9.19411	434	XLOC_007134	-	-
TCONS_00012160	235.559	122.548	348.571	2.84436	1.50811	3.31261e-07	2.15248e-06	Up	9.81522	20.3894	15.9863	57.1461	45.699	56.7614	299	XLOC_007270	-	-
TCONS_00012223	170.322	72.6087	268.036	3.69152	1.88421	6.69466e-06	3.78481e-05	Up	6.39641	1.95447	5.07452	16.5889	26.5127	17.1224	611	XLOC_007309	-	-
TCONS_00012245	191.078	122.931	259.226	2.10872	1.07636	0.00095513	0.0038129	Up	14.6712	17.9332	22.6595	53.2816	46.0237	42.239	251	XLOC_007326	-	-
TCONS_00012404	67.8464	32.7122	102.981	3.14808	1.65447	0.00331707	0.0118124	Up	6.84579	4.28649	5.20562	18.1612	26.7229	17.6796	226	XLOC_007416	-	-
TCONS_00012745	109.879	218.524	1.23513	0.00565214	-7.46699	2.513e-29	4.16797e-28	Down	12.1027	9.89741	10.5392	0.0884608	0.000488107	0.137413	758	XLOC_007626	-	-
TCONS_00012802	58.1048	84.4583	31.7513	0.375941	-1.41142	0.0189294	0.0551173	Down	8.5905	13.6471	12.596	4.2305	4.41327	7.27726	274	XLOC_007659	-	-
TCONS_00012845	183.782	0.344554	367.22	1065.78	10.0577	8.26058e-19	1.0205e-17	Up	2.14168e-06	1.8771e-08	0.0904217	17.7273	40.8354	29.8219	571	XLOC_007695	-	-
TCONS_00012987	20.8242	1.49996	40.1485	26.7663	4.74235	0.000133818	0.000623793	Up	7.60507e-13	0.504192	7.19042e-08	5.41778	8.56508	3.24132	320	XLOC_007779	-	-
TCONS_00013161	51.4281	77.9861	24.8701	0.318904	-1.64881	0.0100501	0.031725	Down	11.0236	9.64217	12.3647	3.89936	3.97563	4.93683	267	XLOC_007891	-	-
TCONS_00013182	15.5614	0	31.1229	Inf	Inf	4.45824e-05	0.000225314	Up	6.98359e-27	6.80576e-25	5.3069e-22	1.71944	7.01977	6.73209	276	XLOC_007902	-	-
TCONS_00013209	17.6116	32.432	2.79124	0.0860644	-3.53844	0.00409414	0.0141597	Down	4.30943	1.57306	3.33138	0.144899	0.356654	0.534683	394	XLOC_007919	-	-
TCONS_00013237	19.7863	38.9715	0.600997	0.0154215	-6.01892	2.60378e-05	0.000135001	Down	4.68958	4.87704	5.04216	0.28294	0	0	302	XLOC_007934	-	-
TCONS_00013256	29.0678	0	58.1357	Inf	Inf	5.55261e-09	4.19872e-08	Up	0	0	0	6.54307	8.39242	10.5446	313	XLOC_007951	-	-
TCONS_00013443	53.2745	18.19	88.3589	4.85756	2.28023	0.000479749	0.00202561	Up	1.3621	1.09909	1.17156	6.42794	7.03067	7.726	571	XLOC_008054	-	-
TCONS_00013518	195.81	276.199	115.421	0.417892	-1.2588	0.000108936	0.000518266	Down	39.0271	54.7833	51.463	17.0151	29.3461	27.3306	215	XLOC_008098	-	-
TCONS_00013569	125.072	187.44	62.7043	0.33453	-1.57979	0.000111707	0.00052977	Down	6.10453	5.98405	7.16897	2.73924	2.6733	2.39672	1101	XLOC_008130	-	-
TCONS_00013754	6538.23	3303.09	9773.37	2.95885	1.56504	7.51847e-110	2.71933e-108	Up	228.09	225.978	246.231	806.744	864.524	841.569	533	XLOC_008246	-	-
TCONS_00013755	6538.23	3303.09	9773.37	2.95885	1.56504	7.51847e-110	2.71933e-108	Up	228.09	225.978	246.231	806.744	864.524	841.569	533	XLOC_008246	-	-
TCONS_00013779	4643.25	8961.04	325.455	0.0363189	-4.78314	0	0	Down	863.851	849.664	812.383	35.4613	33.2008	42.5297	401	XLOC_008261	-	-
TCONS_00013780	4643.25	8961.04	325.455	0.0363189	-4.78314	0	0	Down	863.851	849.664	812.383	35.4613	33.2008	42.5297	401	XLOC_008261	-	-
TCONS_00013794	24.8529	3.44554	46.2603	13.4261	3.74697	0.000432538	0.00184181	Up	0	0	1.39809	7.0612	8.90043	8.01261	264	XLOC_008268	-	-
TCONS_00013809	143.434	79.3885	207.479	2.61346	1.38596	0.000275048	0.00120715	Up	13.2445	11.4563	13.7837	36.3115	51.7929	34.5877	232	XLOC_008279	-	-
TCONS_00013810	431.171	0	862.342	Inf	Inf	2.03478e-66	5.50308e-65	Up	0.000502571	0.0929262	6.33914e-27	231.736	173.125	168.044	206	XLOC_008279	-	-
TCONS_00014110	58.1471	114.792	1.50249	0.0130889	-6.25552	3.75782e-14	3.79831e-13	Down	16.9978	24.3338	19.9319	1.00317	0.0680871	0.000144591	212	XLOC_008459	-	-
TCONS_00014212	85.64	25.3729	145.907	5.7505	2.52369	9.8479e-07	6.083e-06	Up	2.00286	2.20721	1.25567	14.6038	12.9671	10.1938	529	XLOC_008519	-	-
TCONS_00014269	95.2962	46.6865	143.906	3.08239	1.62405	0.00402294	0.0139617	Up	3.92303	4.99019	0.13455	13.4154	13.4381	6.78088	586	XLOC_008558	-	-
TCONS_00014342	62.4724	97.8745	27.0703	0.276582	-1.85422	0.00152787	0.00584288	Down	8.28787	9.27806	11.8473	3.09902	2.59107	4.22187	375	XLOC_008595	-	-
TCONS_00014599	213.024	288.773	137.275	0.475373	-1.07287	0.000616198	0.00254062	Down	27.5483	43.2908	38.4945	19.876	24.7782	18.686	298	XLOC_008729	-	-
TCONS_00014677	42.1554	66.5702	17.7406	0.266495	-1.90782	0.00831645	0.026903	Down	10.782	13.0538	11.1638	3.44619	4.52622	3.48494	214	XLOC_008770	-	-
TCONS_00014710	549.409	340.879	757.939	2.22348	1.15282	4.34924e-09	3.3478e-08	Up	7.77461	6.73649	8.5489	20.2853	21.4302	20.5331	1669	XLOC_008789	-	-
TCONS_00015233	181.337	263.733	98.9418	0.375159	-1.41442	2.97826e-05	0.000153621	Down	12.2173	14.0517	13.6059	5.98446	6.05839	6.10304	748	XLOC_009097	-	-
TCONS_00015390	246.033	145.804	346.261	2.37483	1.24783	0.000652423	0.00266835	Up	8.17465	23.7567	32.3275	60.4802	51.1179	73.5533	256	XLOC_009203	-	-
TCONS_00015441	16.6897	31.8551	1.52429	0.0478509	-4.38531	0.00135909	0.00522405	Down	4.47463	7.2924	5.85479	3.905e-06	0.920161	0.193394	202	XLOC_009234	-	-
TCONS_00015561	964.624	71.1955	1858.05	26.0979	4.70586	1.32278e-146	5.75505e-145	Up	3.01948	5.84337	5.49236	156.664	149.556	148.3	560	XLOC_009303	-	-
TCONS_00015787	19.568	4.4913	34.6447	7.71374	2.94743	0.0104363	0.0326694	Up	0.0540733	0.0339754	0.305566	0.971879	1.51586	1.30972	1251	XLOC_009436	-	-
TCONS_00015788	96.4921	50.4503	142.534	2.82524	1.49837	0.00131209	0.00506938	Up	1.60339	1.30051	0.793962	4.64184	4.1329	3.93231	1536	XLOC_009436	-	-
TCONS_00015819	10419.5	13937.3	6901.75	0.495199	-1.01392	4.97187e-63	1.29787e-61	Down	2191.67	2267.94	2300.27	1386.1	1407.46	1265.29	233	XLOC_009460	-	-
TCONS_00015982	448.204	782.993	113.414	0.144847	-2.7874	1.20447e-33	2.10223e-32	Down	91.8358	74.8248	98.9934	12.634	15.4435	18.5892	333	XLOC_009548	-	-
TCONS_00016009	1120.77	1799.77	441.769	0.245459	-2.02645	5.92754e-45	1.23573e-43	Down	168.94	182.588	183.589	54.7402	50.3097	54.1625	380	XLOC_009567	-	-
TCONS_00016035	12.8068	0	25.6136	Inf	Inf	0.000279536	0.00122506	Up	0	0	0	2.8232	2.53025	5.03078	339	XLOC_009581	-	-
TCONS_00016207	21.6751	4.36917	38.9811	8.92185	3.15734	0.0221263	0.0634414	Up	1.91722	2.12394e-13	0.109237	1.07641	9.98949	11.5683	237	XLOC_009699	-	-
TCONS_00016356	544.443	1020.11	68.7761	0.0674202	-3.89067	8.72443e-68	2.42507e-66	Down	157.653	137.338	138.651	9.33017	12.821	13.4174	266	XLOC_009780	-	-
TCONS_00016454	312.536	114.437	510.635	4.46213	2.15773	2.15281e-13	2.0582e-12	Up	21.7839	25.1134	0.374491	91.387	80.5805	83.3399	274	XLOC_009836	-	-
TCONS_00016455	18.547	0	37.0939	Inf	Inf	0.00135882	0.00522405	Up	0.000102585	6.20161e-07	1.04929e-08	6.66526	11.6706	0.30273	274	XLOC_009836	-	-
TCONS_00016537	69.4727	18.6071	120.338	6.46734	2.69317	0.00224579	0.00837499	Up	4.49336	3.32351	0.0361986	17.0146	11.7451	32.5991	269	XLOC_009885	-	-
TCONS_00016657	59.693	19.5161	99.8699	5.11731	2.35539	0.000141689	0.000656404	Up	3.04725	1.94046	1.20574	13.2089	12.0131	12.9738	358	XLOC_009970	-	-
TCONS_00016707	154.73	0	309.459	Inf	Inf	1.08837e-36	2.02938e-35	Up	3.93908e-09	2.57252e-19	3.12031e-12	63.6839	54.5395	38.786	270	XLOC_009998	-	-
TCONS_00016709	429.949	207.758	652.14	3.13895	1.65028	9.64907e-14	9.5599e-13	Up	35.9458	49.7411	29.3157	140.491	167.985	129.81	204	XLOC_010000	-	-
TCONS_00016726	141.171	210.267	72.0757	0.342782	-1.54464	5.16649e-05	0.000259361	Down	27.4454	22.9596	23.0547	9.98656	6.87082	13.7171	323	XLOC_010010	-	-
TCONS_00016791	50.3785	26.5834	74.1737	2.79023	1.48039	0.021423	0.0617196	Up	1.71286	2.7051	1.75233	6.29112	7.20747	7.13177	494	XLOC_010053	-	-
TCONS_00016980	68.0581	42.7364	93.3798	2.18502	1.12764	0.0389764	0.103816	Up	5.75877	7.25307	4.49901	15.4737	15.9601	15.0825	275	XLOC_010179	-	-
TCONS_00016994	210.738	80.6263	340.85	4.22753	2.07982	2.52914e-07	1.67975e-06	Up	6.01633	4.46832	5.00513	34.0557	25.5456	19.6844	588	XLOC_010185	-	-
TCONS_00017019	1455.96	765.653	2146.27	2.80319	1.48707	2.49564e-32	4.28108e-31	Up	110.07	117.03	123.046	413.736	386.316	390.183	247	XLOC_010197	-	-
TCONS_00017057	376.289	532.019	220.56	0.414572	-1.27031	0.000160497	0.000734469	Down	56.894	44.6303	74.7983	27.995	23.2962	37.2396	341	XLOC_010218	-	-
TCONS_00017086	75.6608	116.949	34.3724	0.293909	-1.76656	0.000773589	0.00313826	Down	14.5664	15.3898	23.267	7.34338	0.787166	10.7123	248	XLOC_010234	-	-
TCONS_00017087	41.8061	7.14063	76.4716	10.7094	3.4208	1.7647e-05	9.37632e-05	Up	2.61642	0.26795	0.36362	13.8246	11.4285	16.2265	252	XLOC_010234	-	-
TCONS_00017098	11.6074	2.10986	21.105	10.003	3.32237	0.0335402	0.0912027	Up	0.123595	0.167174	0.183378	1.5458	2.5037	1.75512	505	XLOC_010241	-	-
TCONS_00017108	7176.7	11291.9	3061.47	0.27112	-1.883	2.47501e-165	1.19838e-163	Down	895.194	835.277	884.616	281.167	273.207	304.997	488	XLOC_010247	-	-
TCONS_00017116	29208.2	42478	15938.5	0.375217	-1.4142	6.41146e-178	3.31848e-176	Down	1248.03	1272.2	1259.94	552.016	586.795	581.023	1270	XLOC_010254	-	-
TCONS_00017118	6094.18	10815.3	1373.06	0.126955	-2.97761	0	0	Down	862.162	884.395	904.756	131.48	139.146	137.601	461	XLOC_010256	-	-
TCONS_00017121	22953.9	13008.4	32899.4	2.52909	1.33862	8.91743e-149	4.05608e-147	Up	457.105	451.17	465.692	1412.26	1420.06	1380.4	1070	XLOC_010257	-	-
TCONS_00017123	292.183	114.658	469.708	4.0966	2.03443	2.49195e-05	0.000129876	Up	5.39001	2.94401	2.61462	24.3592	16.4057	13.2983	1188	XLOC_010257	-	-
TCONS_00017130	27.3729	0	54.7458	Inf	Inf	1.66305e-08	1.21472e-07	Up	8.10578e-28	2.2674e-21	1.56852e-24	9.70146	9.02348	8.2296	279	XLOC_010265	-	-
TCONS_00017172	17.3263	0	34.6525	Inf	Inf	1.35622e-05	7.34904e-05	Up	2.28726e-21	5.31361e-23	4.58095e-20	7.61218	1.73875	5.66869	315	XLOC_010295	-	-
TCONS_00017202	569.036	89.5203	1048.55	11.713	3.55004	1.23254e-42	2.51707e-41	Up	6.67539	10.7892	13.4266	123.465	169.668	145.422	328	XLOC_010316	-	-
TCONS_00017339	57.9378	80.815	35.0607	0.43384	-1.20477	0.0411079	0.108537	Down	9.73873	6.10074	5.40826	3.42878	3.13877	4.63665	432	XLOC_010400	-	-
TCONS_00017519	522.904	809.811	235.997	0.291422	-1.77882	3.92405e-18	4.75e-17	Down	119.606	157.324	126.249	46.936	49.6987	45.6216	227	XLOC_010519	-	-
TCONS_00017623	288.83	48.6409	529.019	10.876	3.44308	1.17594e-30	1.99445e-29	Up	3.20024	2.29059	6.21504	49.0624	48.0277	57.1587	470	XLOC_010577	-	-
TCONS_00017805	9323.43	2653.29	15993.6	6.02783	2.59164	0	0	Up	232.274	277.94	224.964	1736.96	1767.66	1866.32	408	XLOC_010697	-	-
TCONS_00018019	25199.3	14517.5	35881.1	2.47157	1.30543	4.95932e-147	2.18939e-145	Up	1499.84	1710.96	1600.52	4914.63	4812.03	4688.67	341	XLOC_010829	-	-
TCONS_00018057	185.677	25.6468	345.706	13.4795	3.75269	2.40448e-23	3.40484e-22	Up	4.01745	5.78706	1.24182	57.7206	61.1252	62.7092	261	XLOC_010847	-	-
TCONS_00018120	23.8341	3.20439	44.4639	13.8759	3.79451	0.000458145	0.00194534	Up	0.141994	0.399552	0.271658	3.18305	5.75988	4.73224	445	XLOC_010885	-	-
TCONS_00018121	27.8729	2.90861	52.8373	18.1658	4.18315	4.09525e-05	0.000207668	Up	0	0.959851	0.452252	10.8202	12.9092	8.90249	222	XLOC_010886	-	-
TCONS_00018156	52.1439	104.288	0	0	#NAME?	0.000118283	0.000556559	Down	19.7174	23.7871	0.00595757	3.68499e-21	1.81268e-19	2.6571e-20	272	XLOC_010909	-	-
TCONS_00018169	10888.5	17481.4	4295.69	0.245729	-2.02486	2.02515e-237	1.32163e-235	Down	2650.73	2526.29	2452.36	778.887	765.274	728.084	259	XLOC_010917	-	-
TCONS_00018217	221.273	316.506	126.04	0.398224	-1.32835	1.43566e-05	7.71569e-05	Down	37.7315	40.5942	54.448	29.3307	17.3123	17.3442	269	XLOC_010950	-	-
TCONS_00018414	98.8317	34.5657	163.098	4.71849	2.23833	2.32211e-06	1.38864e-05	Up	1.35818	1.84285	1.60474	8.23905	8.72486	10.7305	808	XLOC_011062	-	-
TCONS_00018417	84.7997	20.0011	149.598	7.4795	2.90294	4.67775e-08	3.31194e-07	Up	2.85386	3.22078	3.88635	25.7736	34.0896	31.6728	224	XLOC_011063	-	-
TCONS_00018501	79.6218	141.352	17.8919	0.126577	-2.98191	4.56389e-08	3.24342e-07	Down	14.6196	12.2854	12.2299	1.94031	1.1814	2.82139	408	XLOC_011116	-	-
TCONS_00018697	2952.92	4455.6	1450.24	0.325487	-1.61933	2.26432e-67	6.17952e-66	Down	330.918	334.505	353.875	125.504	136.449	140.377	494	XLOC_011251	-	-
TCONS_00018698	6885.43	11535.2	2235.66	0.193812	-2.36727	1.14931e-242	7.66719e-241	Down	869.167	888.284	860.518	207.494	206.611	200.934	498	XLOC_011252	-	-
TCONS_00018776	65.247	27.9949	102.499	3.66134	1.87237	0.00106433	0.00419857	Up	2.0942	3.08719	1.76248	8.95948	12.2317	9.47557	459	XLOC_011301	-	-
TCONS_00018848	14.6731	4.28976	25.0564	5.84098	2.54621	0.049503	0.126756	Up	0.420529	0.927664	0.407223	2.93812	5.53324	3.28621	295	XLOC_011332	-	-
TCONS_00018853	685.922	932.047	439.797	0.471861	-1.08357	4.63389e-07	2.97242e-06	Down	140.596	132.767	151.327	109.955	80.3345	52.2808	248	XLOC_011336	-	-
TCONS_00018885	7.62194	15.2439	0	0	#NAME?	0.0148791	0.0442686	Down	2.16118	5.92396	0.242464	0.049368	1.5914e-19	1.27315e-06	206	XLOC_011352	-	-
TCONS_00019110	42.8275	69.2972	16.3577	0.236052	-2.08282	0.0036894	0.0130454	Down	12.8167	6.49669	12.0979	3.89069	4.02035	0.990526	249	XLOC_011497	-	-
TCONS_00019260	6755.73	9426.52	4084.94	0.433345	-1.20641	4.05864e-69	1.14944e-67	Down	570.317	572.147	586.915	306.006	297.318	305.171	616	XLOC_011581	-	-
TCONS_00019274	93.6366	141.952	45.3208	0.319268	-1.64716	0.000524616	0.00219651	Down	19.1099	21.4133	22.2716	11.4365	4.35783	8.30286	256	XLOC_011588	-	-
TCONS_00019275	1449.58	1937.83	961.328	0.496086	-1.01134	3.2636e-16	3.64212e-15	Down	259.726	250.598	247.642	155.656	142.347	157.494	289	XLOC_011588	-	-
TCONS_00019289	390.05	567.113	212.987	0.375564	-1.41287	1.27737e-09	1.01447e-08	Down	89.4681	80.8967	72.5095	43.8217	40.9538	25.8589	264	XLOC_011598	-	-
TCONS_00019597	7.52112	0	15.0422	Inf	Inf	0.00928912	0.0296659	Up	8.71826e-50	0	0	2.48551	2.45602	3.0004	255	XLOC_011778	-	-
TCONS_00019612	404.382	254.721	554.042	2.17509	1.12108	0.000528434	0.00220941	Up	48.1962	36.1293	21.9329	113.34	74.4842	91.8542	271	XLOC_011784	-	-
TCONS_00019661	10825.5	16718.5	4932.42	0.295027	-1.76108	1.07576e-182	5.76684e-181	Down	1571.31	1578.87	1585.29	587.623	579.106	526.9	399	XLOC_011825	-	-
TCONS_00019904	259.109	358.976	159.243	0.443603	-1.17266	0.00267107	0.00977873	Down	38.2153	50.793	26.0399	23.9978	19.4329	18.3581	353	XLOC_011972	-	-
TCONS_00019929	683.428	1148.41	218.445	0.190215	-2.3943	7.41163e-15	7.80692e-14	Down	205.506	163.463	140.433	20.0901	56.0702	41.4351	255	XLOC_011988	-	-
TCONS_00020475	81.9665	45.2221	118.711	2.62507	1.39235	0.00619336	0.0204313	Up	9.77111	6.05517	7.7476	25.2316	26.4548	23.4008	217	XLOC_012296	-	-
TCONS_00020501	76.2124	121.116	31.3093	0.258508	-1.95172	0.000266162	0.00117476	Down	8.90866	8.72335	7.54888	3.84088	2.52864	1.48934	543	XLOC_012312	-	-
TCONS_00020536	811.979	517.29	1106.67	2.13936	1.09718	5.93192e-07	3.76483e-06	Up	95.2356	80.3899	87.7541	179.455	241.119	263.112	222	XLOC_012336	-	-
TCONS_00020754	54.7406	90.29	19.1911	0.21255	-2.23413	0.0022885	0.00852369	Down	7.01774	5.13448	2.35642	0.420144	1.34326	1.95489	705	XLOC_012473	-	-
TCONS_00020950	53.26	23.9217	82.5982	3.45285	1.78779	0.00492987	0.0167037	Up	2.00191	2.0472	1.41321	7.80606	7.76613	6.99077	500	XLOC_012602	-	-
TCONS_00021093	103.168	171.638	34.6989	0.202164	-2.3064	7.03085e-07	4.41561e-06	Down	13.9612	13.6129	16.4053	5.17651	3.24595	2.38358	441	XLOC_012699	-	-
TCONS_00021133	55.939	88.7315	23.1466	0.260861	-1.93865	0.00285348	0.0103331	Down	7.7128	14.7054	7.33315	1.75835	5.69484	1.94745	337	XLOC_012723	-	-
TCONS_00021176	85.1212	40.5716	129.671	3.1961	1.67631	0.000760857	0.00309079	Up	5.41495	5.96354	2.82563	16.9544	18.9342	19.2941	322	XLOC_012753	-	-
TCONS_00021187	159.595	213.566	105.624	0.494574	-1.01574	0.00507679	0.0171434	Down	25.9337	35.2576	23.044	13.947	23.4938	13.1763	287	XLOC_012763	-	-
TCONS_00021437	115.009	160.772	69.2469	0.430716	-1.21519	0.00387435	0.0135242	Down	25.2058	18.948	26.1857	14.2243	13.1883	9.50197	258	XLOC_012920	-	-
TCONS_00021459	25.8258	0	51.6517	Inf	Inf	4.7838e-08	3.37112e-07	Up	0	0	0	6.64343	8.50833	10.2554	278	XLOC_012935	-	-
TCONS_00021516	79.0756	129.097	29.0544	0.225059	-2.15163	3.92759e-05	0.00020018	Down	23.4451	13.3902	25.0853	5.80412	5.92499	5.23567	236	XLOC_012967	-	-
TCONS_00021565	30.7653	0	61.5307	Inf	Inf	1.74606e-09	1.37577e-08	Up	0	0	0	9.98304	13.573	10.9763	245	XLOC_013004	-	-
TCONS_00021748	12011.8	17633.1	6390.55	0.362417	-1.46428	4.97574e-136	2.13388e-134	Down	1826.13	1936.2	1851.52	852.459	782.458	830.541	355	XLOC_013113	-	-
TCONS_00022058	260.569	495.654	25.4842	0.0514152	-4.28166	1.49887e-37	2.82994e-36	Down	65.0585	85.061	91.2181	3.09058	6.3	5.68475	232	XLOC_013304	-	-
TCONS_00022157	17.8467	0	35.6933	Inf	Inf	9.41993e-06	5.20785e-05	Up	5.02165e-33	4.30219e-32	4.6074e-30	2.48	7.55354	3.18182	373	XLOC_013355	-	-
TCONS_00022187	8086.14	15385.8	786.48	0.0511172	-4.29005	2.54471e-303	2.24683e-301	Down	1593.35	1665.83	1780.11	88.1751	124.678	99.9191	345	XLOC_013374	-	-
TCONS_00022248	28.4766	47.2679	9.68529	0.204902	-2.287	0.0112879	0.0348982	Down	5.20368	5.02108	6.46386	1.73287	1.90979	0.367579	320	XLOC_013409	-	-
TCONS_00022330	547.568	292.846	802.29	2.73963	1.45398	1.52781e-13	1.48912e-12	Up	42.7709	53.9166	47.1906	157.101	156.198	164.717	230	XLOC_013443	-	-
TCONS_00022378	21.0915	0	42.1829	Inf	Inf	1.09034e-06	6.70739e-06	Up	0	0	0	8.74519	10.016	7.63561	219	XLOC_013466	-	-
TCONS_00022420	75.6668	10.2633	141.07	13.7452	3.78085	2.78685e-10	2.35666e-09	Up	1.48104	3.7927e-13	4.18423	31.8968	36.7348	25.5126	205	XLOC_013488	-	-
TCONS_00022556	150065	239501	60629.3	0.253148	-1.98195	0	0	Down	33898.1	34540.2	34871.1	10518.6	10373.4	10810.8	262	XLOC_013574	-	-
TCONS_00022569	13.3403	1.67692	25.0036	14.9104	3.89825	0.010418	0.032646	Up	0.585559	0	0	4.82153	3.09261	2.71457	322	XLOC_013583	-	-
TCONS_00022573	129.256	76.5397	181.973	2.3775	1.24944	0.00270572	0.00986948	Up	13.3383	1.70942	11.6597	23.2176	30.5641	23.1681	324	XLOC_013587	-	-
TCONS_00022600	81.7989	36.9262	126.672	3.43039	1.77837	0.0207753	0.0600843	Up	3.7297	0.205229	1.05495	5.06225	5.27933	10.4611	834	XLOC_013606	-	-
TCONS_00022610	28.3598	56.7195	0	0	#NAME?	0.0122626	0.0375253	Down	1.08774	25.1953	4.92066	3.35271e-12	0.000378974	2.22181e-13	205	XLOC_013612	-	-
TCONS_00022611	724.701	1326.99	122.413	0.0922487	-3.43833	3.05667e-73	8.90885e-72	Down	113.996	112.709	128.591	13.4655	15.6657	10.5953	422	XLOC_013613	-	-
TCONS_00022612	1761.97	3341.13	182.813	0.054716	-4.19189	3.36259e-218	2.0189e-216	Down	182.203	187.246	189.937	12.9384	11.921	12.2577	675	XLOC_013614	-	-
TCONS_00022614	2494.12	4769.4	218.833	0.0458828	-4.4459	8.37877035600545e-318	7.62214202061098e-316	Down	285.544	269.206	274.576	17.8715	14.6075	13.6445	650	XLOC_013615	-	-
TCONS_00022615	2401.14	4036.63	765.65	0.189676	-2.39839	1.77711e-115	6.58629e-114	Down	595.424	624.717	583.111	144.825	134.673	134.912	253	XLOC_013616	-	-
TCONS_00022617	1070.87	2021.38	120.367	0.0595472	-4.06982	1.99161e-116	7.47351e-115	Down	241.582	287.137	275.477	30.4531	16.1793	11.3313	284	XLOC_013615	-	-
TCONS_00022621	1463.96	2848.27	79.6474	0.0279634	-5.16031	8.95125e-243	6.10719e-241	Down	338.229	340.931	299.565	13.8629	10.4047	8.8539	329	XLOC_013619	-	-
TCONS_00022624	872.597	413.372	1331.82	3.22185	1.68789	4.08859e-26	6.23043e-25	Up	17.4403	18.9095	19.3921	70.2843	77.85	69.7581	838	XLOC_013622	-	-
TCONS_00022626	1713.77	2389.98	1037.56	0.434131	-1.2038	2.97739e-25	4.49152e-24	Down	271.956	291.229	278.385	145.824	145.026	151.869	321	XLOC_013623	-	-
TCONS_00022632	1008.75	597.276	1420.23	2.37785	1.24965	1.63155e-17	1.92831e-16	Up	48.2052	59.2692	45.7214	129.418	154.684	157.316	441	XLOC_013625	-	-
TCONS_00022634	10200.7	6418.88	13982.5	2.17834	1.12323	1.17564e-34	2.11334e-33	Up	927.446	999.645	929.124	2682.93	2533.27	2324.66	254	XLOC_013620	-	-
TCONS_00022830	27.2641	1.67692	52.8512	31.5168	4.97805	8.4804e-06	4.74081e-05	Up	0.745385	0	0	10.6782	12.0131	8.95622	230	XLOC_013751	-	-
TCONS_00022925	43511.6	70935.7	16087.5	0.22679	-2.14057	0	0	Down	11454.2	11185.9	11913	3227.49	3030.96	3239.7	232	XLOC_013801	-	-
TCONS_00023008	27.7898	4.21972	51.3599	12.1714	3.60542	0.000266493	0.00117476	Up	0.203321	0.225583	0.204082	2.6787	2.91899	3.94411	738	XLOC_013852	-	-
TCONS_00023063	13.3538	0	26.7075	Inf	Inf	0.000191714	0.000865453	Up	0	0	0	4.52572	4.21488	5.29667	263	XLOC_013890	-	-
TCONS_00023128	27.9512	54.6672	1.23513	0.0225935	-5.46795	0.000153562	0.000704881	Down	2.1073	12.2032	11.8148	0.380296	4.4643e-23	0.283104	237	XLOC_013925	-	-
TCONS_00023136	132.076	197.854	66.2975	0.335083	-1.57741	7.57327e-05	0.000370276	Down	32.7285	38.9082	34.5463	14.5357	12.2124	16.1898	211	XLOC_013930	-	-
TCONS_00023141	100.734	187.762	13.7047	0.0729894	-3.77617	1.66685e-13	1.61416e-12	Down	18.0278	20.4846	19.6258	3.75929	1.04573e-08	1.25699	365	XLOC_013933	-	-
TCONS_00023167	847.263	1694.53	0	0	#NAME?	5.88487e-244	4.10846e-242	Down	248.308	239.114	209.251	1.95121e-25	5.00945e-24	2.35285e-24	275	XLOC_013952	-	-
TCONS_00023272	202.388	134.25	270.525	2.01508	1.01084	0.00133619	0.00515574	Up	11.087	13.9746	12.5829	32.6358	29.9968	29.2909	403	XLOC_014019	-	-
TCONS_00023286	170.477	0	340.955	Inf	Inf	1.48596e-49	3.32899e-48	Up	0	0	0	58.3555	63.4368	48.1821	275	XLOC_014030	-	-
TCONS_00023373	44.9945	7.10726	82.8816	11.6615	3.54369	0.00371959	0.0131363	Up	1.36864	6.86257e-26	0.702882	15.2033	10.4693	2.74951	398	XLOC_014071	-	-
TCONS_00023485	194.948	40.5969	349.298	8.60405	3.10502	4.57018e-08	3.24342e-07	Up	9.36746	5.07996	7.29244	63.2045	57.9607	104.297	212	XLOC_014135	-	-
TCONS_00023627	55.5141	107.708	3.31988	0.0308229	-5.01985	3.4606e-11	3.07359e-10	Down	23.3888	11.6284	23.0719	0	2.12953	0	210	XLOC_014228	-	-
TCONS_00023650	170779	308953	32605.9	0.105537	-3.24418	0	0	Down	50223.6	49288	47835.5	6391.83	6381.39	6076.17	237	XLOC_014244	-	-
TCONS_00023653	464.728	893.869	35.5867	0.039812	-4.65065	4.6424e-74	1.37985e-72	Down	137.013	163.258	129.914	12.5247	0.0039707	8.0896	235	XLOC_014246	-	-
TCONS_00023660	77.3099	132.841	21.7783	0.163942	-2.60874	5.99571e-06	3.43859e-05	Down	13.7957	7.76264	17.2672	2.56542	2.3918	2.81435	386	XLOC_014252	-	-
TCONS_00023661	100.935	201.871	0	0	#NAME?	4.83098e-17	5.59946e-16	Down	23.4256	11.818	12.9002	9.28786e-18	2.43436e-15	2.57852e-17	475	XLOC_014253	-	-
TCONS_00023668	110.711	221.421	0	0	#NAME?	6.54396e-22	8.9703e-21	Down	14.9654	22.8861	30.091	0.000324111	2.61308e-05	1.67569e-05	368	XLOC_014257	-	-
TCONS_00023696	97.3498	61.811	132.889	2.14992	1.10428	0.0154875	0.0459421	Up	5.08755	8.04724	7.91016	16.3755	18.1678	20.4101	331	XLOC_014277	-	-
TCONS_00023770	567.885	1029.86	105.907	0.102836	-3.28158	2.64177e-54	6.34448e-53	Down	94.4016	97.0545	86.343	15.4966	9.71061	9.41144	419	XLOC_014328	-	-
TCONS_00023771	182379	295082	69676	0.236124	-2.08238	0	0	Down	25961.1	25838.4	26301.4	7358.41	7438.14	7560.61	427	XLOC_014328	-	-
TCONS_00023889	126.987	42.6311	211.343	4.9575	2.30961	5.12018e-08	3.58293e-07	Up	3.72687	1.03656	3.12746	16.8051	17.5146	13.1247	610	XLOC_014405	-	-
TCONS_00024004	11220.2	4061.5	18379	4.52518	2.17797	2.60641e-07	1.72725e-06	Up	284.89	207.955	263.393	1315.67	1022.18	1806.38	607	XLOC_014477	-	-
TCONS_00024015	97.5176	42.0032	153.032	3.64334	1.86526	8.61315e-05	0.000415702	Up	8.85145	2.68959	10.3678	37.3457	35.8361	23.476	217	XLOC_014483	-	-
TCONS_00024017	6649.8	2263.11	11036.5	4.87671	2.28591	1.18095e-05	6.43413e-05	Up	134.606	275.764	309.244	1905.26	1418.27	931.043	355	XLOC_014477	-	-
TCONS_00024018	8301.23	3996.63	12605.8	3.15411	1.65723	2.02988e-06	1.21631e-05	Up	387.21	498.193	366.227	2048.39	1292.28	1435.07	361	XLOC_014477	-	-
TCONS_00024301	1412.94	742.59	2083.29	2.80544	1.48823	6.47158e-25	9.66551e-24	Up	88.5813	154.825	137.809	444.967	406.562	445.34	220	XLOC_014642	-	-
TCONS_00024328	397.38	549.47	245.289	0.44641	-1.16356	3.21749e-07	2.09976e-06	Down	73.1824	80.726	82.2356	29.8755	47.349	50.7825	263	XLOC_014659	-	-
TCONS_00024377	34.6542	0.710375	68.598	96.566	6.59344	5.78498e-09	4.35251e-08	Up	0.145749	0.130474	1.17767e-07	10.9301	6.54366	12.8189	310	XLOC_014681	-	-
TCONS_00024470	106.297	62.2203	150.374	2.41679	1.27309	0.00419575	0.0144445	Up	8.69048	5.36936	8.84042	22.4029	25.2283	19.4965	307	XLOC_014737	-	-
TCONS_00024573	84.7447	6.88718	162.602	23.6094	4.56129	1.37574e-14	1.43402e-13	Up	1.07879	2.39412	3.45977e-27	23.2587	37.3497	39.9447	222	XLOC_014778	-	-
TCONS_00024635	19.1995	33.8161	4.5829	0.135524	-2.88338	0.0118698	0.0363974	Down	2.84445	4.94997	7.05742	0.692898	1.08028	0.715645	256	XLOC_014811	-	-
TCONS_00024710	6.37523	12.7505	0	0	#NAME?	0.0167067	0.0490739	Down	1.15334	1.63303	0.883476	0	0	0	399	XLOC_014857	-	-
TCONS_00024729	1770.13	0	3540.25	Inf	Inf	0	0	Up	3.45968e-18	9.72569e-26	1.45067e-16	517.985	541.488	500.418	311	XLOC_014866	-	-
TCONS_00024832	38.678	77.3559	0	0	#NAME?	4.35652e-10	3.58309e-09	Down	12.0401	12.8386	4.20254	0	8.78748e-28	1.25831e-25	301	XLOC_014920	-	-
TCONS_00024845	36.0692	16.2536	55.8848	3.43831	1.7817	0.0219493	0.0630152	Up	1.25519	1.40314	0.551795	5.18778	2.81118	5.1734	582	XLOC_014925	-	-
TCONS_00024847	17.7222	3.10099	32.3433	10.43	3.38267	0.00662427	0.0217097	Up	9.62847e-07	0.000370394	0.887456	4.97788	3.68046	3.14552	378	XLOC_014925	-	-
TCONS_00024876	57.1888	114.378	0	0	#NAME?	7.80578e-18	9.33584e-17	Down	18.7893	18.3808	17.0529	1.08789e-17	1.23934e-14	0.0228488	239	XLOC_014949	-	-
TCONS_00024879	358.782	593.049	124.514	0.209955	-2.25185	1.60431e-19	2.03213e-18	Down	55.308	55.5825	59.6174	13.5581	14.3129	15.5755	393	XLOC_014951	-	-
TCONS_00024901	72.2393	144.479	0	0	#NAME?	2.78458e-18	3.38434e-17	Down	17.5752	13.178	8.19743	1.30113e-17	1.82587e-10	9.42351e-12	420	XLOC_014965	-	-
TCONS_00024902	194.104	388.208	0	0	#NAME?	2.76393e-15	2.97395e-14	Down	61.32	45.9394	109.503	1.14749e-26	2.01865e-27	2.8947e-27	202	XLOC_014965	-	-
TCONS_00024920	31.4196	48.1088	14.7304	0.306189	-1.7075	0.040362	0.106943	Down	3.87098	3.63071	2.70134	0.916626	1.45649	1.37546	533	XLOC_014979	-	-
TCONS_00024929	101.167	170.061	32.2726	0.189771	-2.39767	3.16269e-07	2.0685e-06	Down	19.8717	16.8216	16.966	2.44011	5.11822	4.858	358	XLOC_014981	-	-
TCONS_00024966	35.1883	55.7446	14.6319	0.262481	-1.92972	0.0145423	0.0433096	Down	5.92387	4.63751	9.36347	3.79451	0.979936	1.63255	316	XLOC_015003	-	-
TCONS_00025080	5.89265	0	11.7853	Inf	Inf	0.0268808	0.0748573	Up	9.15398e-17	5.84811e-21	1.04851e-13	1.24732	2.60469	0.216499	398	XLOC_015070	-	-
TCONS_00025156	108.955	179.625	38.286	0.213144	-2.2301	7.33373e-07	4.5771e-06	Down	12.2313	13.8942	13.8827	4.01341	2.79329	3.52472	506	XLOC_015116	-	-
TCONS_00025171	281.989	13.4792	550.499	40.8407	5.35194	1.86798e-53	4.41549e-52	Up	1.65365	2.75463	1.66024	98.9458	102.751	97.5464	252	XLOC_015127	-	-
TCONS_00025276	63748.4	108563	18934.1	0.174407	-2.51947	0	0	Down	15593.4	15762.3	15124	3201.69	3336.28	3289.79	264	XLOC_015194	-	-
TCONS_00025427	62.8795	125.759	0	0	#NAME?	1.68898e-19	2.13039e-18	Down	14.9476	22.5942	20.1406	0	0	0	246	XLOC_015281	-	-
TCONS_00025440	539.832	740.581	339.084	0.457862	-1.12701	1.09469e-08	8.09421e-08	Down	95.4805	92.3971	78.8528	49.7393	53.9348	44.2169	314	XLOC_015290	-	-
TCONS_00025471	86.5153	134.435	38.5956	0.287095	-1.8004	0.0016709	0.00634941	Down	29.2872	28.4304	14.7858	15.3084	0.51069	9.14605	210	XLOC_015307	-	-
TCONS_00025548	138.928	0	277.857	Inf	Inf	1.02747e-38	2.04269e-37	Up	1.15559e-19	1.6368e-15	1.26615e-17	37.855	27.5667	25.3184	419	XLOC_015356	-	-
TCONS_00025566	4113.9	2416.99	5810.81	2.40415	1.26553	1.3414e-07	9.11059e-07	Up	475.719	368.005	365.543	1390.95	976.662	1150.22	226	XLOC_015368	-	-
TCONS_00025665	167.249	248.358	86.1395	0.346836	-1.52767	1.4067e-05	7.59519e-05	Down	23.01	19.7356	22.2346	8.46069	9.285	9.50424	432	XLOC_015421	-	-
TCONS_00025709	28.929	56.9068	0.951192	0.0167149	-5.90272	4.84726e-06	2.80916e-05	Down	3.58662	7.52636	2.64886	8.14518e-13	1.6217e-10	0.288778	466	XLOC_015451	-	-
TCONS_00025725	40.2221	74.1063	6.33796	0.0855253	-3.54751	1.23502e-05	6.71653e-05	Down	6.12533	9.04126	4.87187	1.44306e-16	2.14338	5.32963e-08	418	XLOC_015462	-	-
TCONS_00025743	128.883	34.3797	223.386	6.49762	2.69991	2.19821e-10	1.86414e-09	Up	5.73237	5.52937	5.07491	42.2957	42.2899	44.1913	238	XLOC_015473	-	-
TCONS_00025781	187.55	250.47	124.63	0.497583	-1.00699	0.00223175	0.00834335	Down	21.3811	19.7924	21.135	12.7726	14.3407	10.5048	454	XLOC_015493	-	-
TCONS_00025912	46.7147	72.2067	21.2227	0.293915	-1.76653	0.0096303	0.0306252	Down	13.6361	17.8526	8.82402	6.89107	1.18835	6.26414	203	XLOC_015578	-	-
TCONS_00025972	66.7506	34.862	98.6391	2.82941	1.5005	0.00799489	0.0259186	Up	3.54805	2.75754	4.96159	11.6039	14.3398	12.985	347	XLOC_015617	-	-
TCONS_00025990	51.2944	73.4759	29.1128	0.396223	-1.33562	0.0368709	0.0986372	Down	7.67496	7.98657	6.34928	3.87779	3.03161	3.74236	376	XLOC_015627	-	-
TCONS_00026005	344753	560247	129259	0.230718	-2.1158	0	0	Down	88210.9	89912.3	89044	24034.7	25417.7	25286.7	237	XLOC_015638	-	-
TCONS_00026127	23.6233	9.22044	38.0262	4.12412	2.04409	0.0409166	0.108273	Up	1.6709	0	3.31235	12.2936	7.64924	5.19659	207	XLOC_015711	-	-
TCONS_00026231	227.312	150.56	304.063	2.01954	1.01403	0.000630617	0.00259331	Up	4.03923	6.98982	9.00417	15.8094	19.3166	14.0476	848	XLOC_015770	-	-
TCONS_00026232	115.246	26.8735	203.618	7.57693	2.92161	1.54891e-10	1.32473e-09	Up	1.7344	1.3389	1.75349	13.5051	16.543	14.456	627	XLOC_015770	-	-
TCONS_00026295	44.9141	21.5436	68.2845	3.16959	1.6643	0.0161288	0.0476562	Up	1.90758	2.58102	2.01998	6.25205	8.6306	10.3768	371	XLOC_015811	-	-
TCONS_00026307	224.294	86.7204	361.867	4.1728	2.06102	8.70433e-05	0.000419429	Up	27.1701	6.76849	2.52988	42.9471	73.8902	67.7406	269	XLOC_015815	-	-
TCONS_00026421	48.6309	97.2619	0	0	#NAME?	1.53928e-06	9.33518e-06	Down	23.3657	18.1954	3.49052	7.88588e-16	0.0380864	1.98027e-10	245	XLOC_015881	-	-
TCONS_00026422	192.091	296.172	88.0108	0.297161	-1.75068	3.1212e-07	2.04582e-06	Down	50.3139	40.5477	30.2309	13.6945	11.1943	18.7007	277	XLOC_015881	-	-
TCONS_00026446	86344.5	145880	26809.4	0.183778	-2.44397	0	0	Down	24559.8	24663.9	24709.8	5560.15	5512.4	5398.61	223	XLOC_015891	-	-
TCONS_00026575	50.738	2.34769	99.1283	42.2237	5.39998	1.07813e-10	9.35419e-10	Up	1.094	0	0	21.1198	15.8022	22.3759	229	XLOC_015975	-	-
TCONS_00026582	269.935	402.74	137.13	0.340492	-1.55431	2.67965e-08	1.92909e-07	Down	43.4108	43.5616	44.6516	20.4322	18.6697	15.22	346	XLOC_015979	-	-
TCONS_00026637	22.7342	5.03681	40.4316	8.02723	3.0049	0.0042479	0.0146073	Up	0	1.0778	1.01462	6.07778	4.87267	10.2258	262	XLOC_016016	-	-
TCONS_00026665	310.679	609.525	11.8331	0.0194136	-5.68679	3.97617e-64	1.05633e-62	Down	113.528	88.9105	88.3978	2.31643	4.25461e-18	4.6296	237	XLOC_016036	-	-
TCONS_00026781	1011.67	441.185	1582.15	3.58615	1.84243	1.39303e-34	2.48921e-33	Up	81.8036	77.5086	82.7284	375.85	349.212	327.072	206	XLOC_016104	-	-
TCONS_00026795	2789.69	4005.03	1574.35	0.393094	-1.34706	3.80954e-08	2.72291e-07	Down	593.027	517.215	451.408	208.95	176.579	357.728	290	XLOC_016115	-	-
TCONS_00026835	82736.1	117925	47546.8	0.403194	-1.31046	5.60088e-187	3.05706e-185	Down	12085.6	12352.1	12077.7	5989.59	6148.07	5711.97	365	XLOC_016131	-	-
TCONS_00026869	144.384	209.231	79.5363	0.380136	-1.39541	0.000239378	0.00106304	Down	18.0879	21.7415	14.2506	9.03566	6.08617	9.73598	438	XLOC_016155	-	-
TCONS_00026928	19.4762	4.26849	34.684	8.12558	3.02247	0.00836598	0.027005	Up	0.298697	0.996005	0.8928	6.87905	7.5716	8.70073	205	XLOC_016194	-	-
TCONS_00026936	24.8473	0	49.6945	Inf	Inf	8.81124e-08	6.08076e-07	Up	2.32715e-05	0.0102508	0.000895744	11.4924	12.2903	7.63303	217	XLOC_016198	-	-
TCONS_00027061	5221.74	9855.56	587.914	0.0596531	-4.06726	0	0	Down	403.921	403.095	378.099	27.7482	28.0151	29.8922	940	XLOC_016262	-	-
TCONS_00027065	28800.6	15077	42524.2	2.82046	1.49593	4.91684e-197	2.78497e-195	Up	277.51	288.421	293.293	987.622	971.589	978.652	1983	XLOC_016266	-	-
TCONS_00027114	119.061	165.379	72.7423	0.439852	-1.18491	0.00431371	0.0147828	Down	11.4662	12.0268	8.47354	5.19857	5.46895	6.40848	585	XLOC_016293	-	-
TCONS_00027202	29.1065	0	58.213	Inf	Inf	5.29358e-09	4.02312e-08	Up	0	0	0	8.5283	7.13252	8.25825	332	XLOC_016350	-	-
TCONS_00027275	6.38459	12.7692	0	0	#NAME?	0.016638	0.04892	Down	0	1.54486	2.81556	0	0	0	323	XLOC_016399	-	-
TCONS_00027338	31.9438	54.8772	9.01047	0.164193	-2.60653	0.00245627	0.00909214	Down	5.34045	13.0554	9.40908	0.133006	2.01127	3.37762	223	XLOC_016438	-	-
TCONS_00027341	61.128	9.49144	112.764	11.8807	3.57054	4.93929e-08	3.46443e-07	Up	1.08185	1.42252	2.29953	18.6269	22.9931	26.9564	225	XLOC_016440	-	-
TCONS_00027529	365.95	702.315	29.5861	0.0421266	-4.56913	8.44029e-58	2.12922e-56	Down	89.1849	91.6755	99.4729	2.74592	8.31607	3.38676	283	XLOC_016577	-	-
TCONS_00027647	39.8225	69.0125	10.6326	0.154067	-2.69837	0.000484135	0.00204126	Down	7.46581	9.17898	8.50674	2.29013	1.58869	0.814452	309	XLOC_016648	-	-
TCONS_00027660	31.7345	7.6038	55.8652	7.34702	2.87716	0.00093206	0.00373073	Up	0.22561	0.996516	0.33122	3.89921	4.65313	5.10245	559	XLOC_016656	-	-
TCONS_00027674	161.742	228.953	94.5305	0.412882	-1.2762	0.000317338	0.00137467	Down	37.7829	24.8081	38.3969	21.1387	16.6344	12.671	256	XLOC_016663	-	-
TCONS_00027752	1066.61	651.033	1482.19	2.27668	1.18693	1.56881e-16	1.77051e-15	Up	137.113	108.993	104.47	338.709	319.024	309.131	210	XLOC_016715	-	-
TCONS_00027795	1072.3	1797.81	346.799	0.192901	-2.37407	5.26713e-57	1.30677e-55	Down	233.655	216.171	205.705	56.3872	49.991	46.9066	310	XLOC_016744	-	-
TCONS_00027797	23.8985	2.01231	45.7847	22.7524	4.50794	0.000815216	0.00328846	Up	1.03847	0	0	8.53198	15.557	3.47953	229	XLOC_016746	-	-
TCONS_00027871	8.28065	0	16.5613	Inf	Inf	0.00559903	0.0186967	Up	0	0	0	3.4305	2.58864	3.46588	243	XLOC_016793	-	-
TCONS_00027967	571.665	1112.87	30.4639	0.0273743	-5.19104	3.15985e-103	1.0424e-101	Down	193.715	181.914	171.393	5.4744	4.94531	7.67015	230	XLOC_016856	-	-
TCONS_00028042	53.4003	6.18364	100.617	16.2715	4.02427	0.000205232	0.000923697	Up	0.208091	1.58521e-25	1.54274	16.96	12.1607	4.41136	410	XLOC_016894	-	-
TCONS_00028112	18.3454	36.3737	0.317064	0.00871685	-6.84198	2.03811e-05	0.000107152	Down	3.60629	2.8387	2.36431	0	0	0.111622	468	XLOC_016933	-	-
TCONS_00028121	83.7119	34.1173	133.307	3.9073	1.96617	0.000112842	0.000533468	Up	2.76117	2.81299	1.98116	10.8068	12.8027	12.3122	509	XLOC_016940	-	-
TCONS_00028199	5.80045	11.6009	0	0	#NAME?	0.0245745	0.06927	Down	2.58437	2.16835	0.250812	6.77753e-24	2.07607e-21	2.2905e-17	263	XLOC_016991	-	-
TCONS_00028487	2580.13	1182.5	3977.76	3.36386	1.75012	1.31417e-22	1.83495e-21	Up	219.726	221.767	155.62	878.182	706.817	845.94	224	XLOC_017163	-	-
TCONS_00028583	213.534	139.818	287.249	2.05445	1.03875	0.000776455	0.00314564	Up	17.6659	19.0609	18.7555	41.5345	48.368	48.2089	285	XLOC_017223	-	-
TCONS_00028661	113.895	61.5823	166.208	2.69896	1.4324	0.000853455	0.00342523	Up	2.63113	2.1753	2.05487	7.31421	7.00637	8.00262	1020	XLOC_017267	-	-
TCONS_00028662	5.21703	0	10.4341	Inf	Inf	0.0427951	0.112202	Up	5.1942e-25	2.48251e-24	1.3944e-27	1.0315	1.7819	1.54427	334	XLOC_017267	-	-
TCONS_00028700	34.2211	0	68.4422	Inf	Inf	1.72907e-10	1.47462e-09	Up	0	0	0	11.2231	10.9174	8.89181	301	XLOC_017290	-	-
TCONS_00028816	71.093	40.6486	101.537	2.49793	1.32073	0.0138252	0.0415447	Up	3.10952	6.73902	8.28773	17.6002	20.776	16.5645	253	XLOC_017358	-	-
TCONS_00028851	14.9417	29.8834	0	0	#NAME?	3.94856e-05	0.000200908	Down	6.90299	1.78721	6.70744	0	0	0	220	XLOC_017376	-	-
TCONS_00028934	53236.8	86994.3	19479.3	0.223914	-2.15898	0	0	Down	4845.88	4769.6	4907	1375.48	1284.77	1280.92	677	XLOC_017440	-	-
TCONS_00029208	45.877	15.8606	75.8935	4.78503	2.25853	0.00126503	0.00492557	Up	1.04606	1.52867	1.73583	6.25314	11.0801	7.76216	414	XLOC_017621	-	-
TCONS_00029229	38.4056	69.5067	7.30441	0.105089	-3.25031	5.83895e-05	0.000289728	Down	9.93896	7.6558	8.08506	1.10748e-23	2.7697	0.566221	306	XLOC_017634	-	-
TCONS_00029278	579.808	167.461	992.155	5.92468	2.56674	7.87581e-37	1.4777e-35	Up	9.25859	6.32803	9.52986	65.6396	58.2071	56.5882	753	XLOC_017661	-	-
TCONS_00029299	20.3559	36.3366	4.37525	0.120409	-3.05399	0.00628987	0.0207116	Down	4.99651	10.0208	5.67038	0.480647	0.500335	2.08967	201	XLOC_017674	-	-
TCONS_00029329	84.2051	116.317	52.0936	0.447861	-1.15888	0.0185806	0.0541543	Down	13.5573	11.7894	10.1132	5.7338	7.0255	6.47818	372	XLOC_017691	-	-
TCONS_00029353	226.722	453.444	0	0	#NAME?	4.58265e-29	7.51756e-28	Down	52.6859	94.2604	62.2679	2.19267e-20	1.15717e-18	7.13758e-13	245	XLOC_017702	-	-
TCONS_00029507	17.202	0	34.404	Inf	Inf	1.48155e-05	7.94217e-05	Up	0	0	0	4.10575	5.57471	6.02402	302	XLOC_017799	-	-
TCONS_00029530	1414.23	1913.06	915.408	0.478505	-1.06339	2.57046e-17	3.00253e-16	Down	354.723	367.151	308.164	196.57	181.862	218.678	210	XLOC_017817	-	-
TCONS_00029564	311.573	588.366	34.7804	0.0591136	-4.08037	3.6843e-26	5.64299e-25	Down	109.179	106.72	72.277	9.15442	6.01575	5.47809	231	XLOC_017834	-	-
TCONS_00029736	59.609	31.1113	88.1066	2.83198	1.50181	0.028597	0.0787598	Up	5.03019	2.09593	1.87449	15.6822	7.04835	7.80654	394	XLOC_017935	-	-
TCONS_00029860	135.936	64.4172	207.454	3.22048	1.68728	1.63128e-05	8.69824e-05	Up	3.17429	4.60007	3.03622	15.0151	15.0551	12.0099	675	XLOC_018011	-	-
TCONS_00029889	138.941	237.368	40.5138	0.170679	-2.55064	3.17786e-10	2.64998e-09	Down	12.3884	19.5967	19.0021	2.5016	4.19914	3.84854	526	XLOC_018026	-	-
TCONS_00030165	67.2193	98.8613	35.5773	0.359871	-1.47445	0.00939837	0.0299829	Down	7.33499	13.8333	12.3012	3.64958	8.45349	2.56639	334	XLOC_018196	-	-
TCONS_00030213	307.778	426.906	188.651	0.441902	-1.1782	4.9946e-06	2.88342e-05	Down	42.665	41.8379	40.8823	20.7641	22.112	24.3975	385	XLOC_018230	-	-
TCONS_00030232	66.4777	118.832	14.1234	0.118852	-3.07276	4.0715e-07	2.62373e-06	Down	14.2284	10.7763	9.53914	4.88515	0.00434322	0.031797	389	XLOC_018238	-	-
TCONS_00030254	34.4454	4.43336	64.4575	14.5392	3.86188	2.02529e-05	0.000106665	Up	0.529034	0	0.819882	8.21217	6.69482	9.11574	368	XLOC_018251	-	-
TCONS_00030255	145.666	57.8354	233.497	4.03727	2.01338	1.71489e-07	1.15688e-06	Up	3.4526	5.34619	5.82498	24.5286	24.3218	22.7549	447	XLOC_018251	-	-
TCONS_00030256	12.6999	0	25.3999	Inf	Inf	0.000302884	0.0013216	Up	0	0	2.77339e-27	1.89331	2.97295	5.95094	318	XLOC_018251	-	-
TCONS_00030257	155.274	21.9157	288.632	13.1701	3.7192	6.18324e-12	5.62488e-11	Up	2.65271	4.34249	4.03815	67.8705	71.1509	38.4226	223	XLOC_018252	-	-
TCONS_00030258	17.1114	2.10986	32.113	15.2205	3.92794	0.00276248	0.0100521	Up	0.291777	0.334596	0.29255	6.84685	6.65945	5.93599	228	XLOC_018253	-	-
TCONS_00030267	230.623	340.172	121.073	0.355918	-1.49038	5.14392e-07	3.28554e-06	Down	33.9403	22.8294	31.8515	11.5127	9.44758	17.1569	434	XLOC_018257	-	-
TCONS_00030268	64.7735	35.4635	94.0835	2.65297	1.40761	0.0269085	0.0748649	Up	1.40898	8.6347	1.39906	16.1417	12.4056	8.1489	350	XLOC_018257	-	-
TCONS_00030349	329.848	134.331	525.365	3.91099	1.96753	2.93518e-14	3.00731e-13	Up	17.24	10.8153	12.5137	60.2762	71.9517	59.8072	375	XLOC_018305	-	-
TCONS_00030438	22.0877	7.05829	37.1172	5.25866	2.3947	0.0209038	0.0603976	Up	0.702893	1.1375	1.21947	7.23183	5.77651	7.5698	245	XLOC_018363	-	-
TCONS_00030540	168.115	284.898	51.3329	0.18018	-2.47249	1.44383e-11	1.29385e-10	Down	19.7886	22.5202	20.6803	4.59486	3.54442	5.58294	511	XLOC_018415	-	-
TCONS_00030543	113.268	213.982	12.5541	0.0586689	-4.09126	7.65859e-17	8.74186e-16	Down	24.7514	16.0859	24.2997	1.53536	1.60397	1.5036	371	XLOC_018415	-	-
TCONS_00030549	10.4336	20.8672	0	0	#NAME?	0.000960495	0.00382922	Down	1.81525	1.1946	2.11903	0.000381311	5.07846e-05	7.63338e-15	464	XLOC_018415	-	-
TCONS_00030735	717.358	1321.3	113.412	0.0858337	-3.54231	1.26094e-36	2.33662e-35	Down	198.351	182.294	141.69	19.0557	19.1839	16.0403	286	XLOC_018532	-	-
TCONS_00030736	959.315	1841.67	76.9609	0.0417887	-4.58074	4.44034e-38	8.59994e-37	Down	175.853	126.233	138.121	0.000329057	22.5383	8.36344e-05	473	XLOC_018532	-	-
TCONS_00030737	993.668	1774.06	213.273	0.120217	-3.05629	9.79903e-74	2.88399e-72	Down	66.31	80.6185	76.5288	10.8378	9.57125	12.1405	897	XLOC_018532	-	-
TCONS_00030738	1941.57	3592.2	290.937	0.0809913	-3.62609	7.72352e-122	3.01117e-120	Down	306.417	311.34	350.876	16.8531	44.4019	34.2917	419	XLOC_018532	-	-
TCONS_00030739	1532.3	2895.33	169.28	0.0584666	-4.09624	1.61672e-187	8.98778e-186	Down	248.722	268.472	231.771	8.749	18.2588	26.1506	437	XLOC_018532	-	-
TCONS_00030740	200.083	398.364	1.80299	0.00452599	-7.78755	5.68866e-17	6.54305e-16	Down	45.8979	20.0327	37.084	0.589026	1.08105e-11	4.03886e-11	437	XLOC_018532	-	-
TCONS_00030741	799.549	1599.1	0	0	#NAME?	2.83426e-134	1.18173e-132	Down	135.441	123.67	160.057	0.00100366	6.9082e-18	6.74712e-14	431	XLOC_018532	-	-
TCONS_00030768	79924.6	107342	52507.6	0.489164	-1.03161	6.00148e-118	2.28056e-116	Down	4805.25	4792.57	4742.71	2818.77	2801.9	2882.57	846	XLOC_018551	-	-
TCONS_00030844	366.583	733.166	0	0	#NAME?	5.3108e-109	1.87565e-107	Down	65.6008	69.0243	59.0378	1.82709e-21	1.07905e-22	3.52351e-24	428	XLOC_018587	-	-
TCONS_00030847	6.83587	13.6717	0	0	#NAME?	0.011432	0.0352711	Down	2.9854	0.518697	2.04309	3.5651e-06	0.0125783	1.96044e-10	280	XLOC_018590	-	-
TCONS_00030885	7.43895	0	14.8779	Inf	Inf	0.00965619	0.030675	Up	0	0	0	4.92033	3.15698	1.64056	211	XLOC_018618	-	-
TCONS_00030897	25.4424	6.25036	44.6344	7.1411	2.83615	0.00417315	0.0143832	Up	0.954975	0.565587	0.656916	5.0422	7.83121	5.32389	337	XLOC_018626	-	-
TCONS_00030918	2328.08	3873.29	782.867	0.202119	-2.30672	1.53077e-105	5.16336e-104	Down	367.527	359.016	370.553	77.4908	98.6484	92.9502	399	XLOC_018638	-	-
TCONS_00030950	566.016	930.143	201.89	0.217052	-2.20389	2.32706e-28	3.73573e-27	Down	79.8457	70.1551	72.7191	20.3798	20.1197	18.1232	472	XLOC_018654	-	-
TCONS_00030994	28.2126	0	56.4252	Inf	Inf	0.0489151	0.12583	Up	1.58462e-16	4.22183e-22	3.88398e-15	33.3301	2.74066e-07	2.88141	211	XLOC_018678	-	-
TCONS_00031172	20.0554	0	40.1108	Inf	Inf	0.00241318	0.00894366	Up	2.63295e-17	3.52416e-15	7.8868e-14	9.96246	1.85356e-11	5.53435	350	XLOC_018761	-	-
TCONS_00031183	771.862	1088.57	455.158	0.418127	-1.25799	3.06749e-14	3.13218e-13	Down	156.949	127.534	147.12	66.4083	76.8276	75.7236	285	XLOC_018770	-	-
TCONS_00031184	13978.2	21220.8	6735.65	0.317408	-1.65559	6.84905e-34	1.20239e-32	Down	2589.34	2559.93	2662.51	1204.68	1166.62	634.865	307	XLOC_018771	-	-
TCONS_00031185	57148.7	100980	13317.8	0.131885	-2.92264	0	0	Down	12088.3	12077.9	11725.4	1652.32	1743.99	2341.84	318	XLOC_018771	-	-
TCONS_00031186	2233.71	4264.06	203.362	0.0476921	-4.39011	1.38111e-284	1.12057e-282	Down	594.092	565.557	573.939	27.6966	49.3127	23.4913	278	XLOC_018771	-	-
TCONS_00031188	37749.3	55413.2	20085.3	0.362464	-1.46409	6.63946e-203	3.90817e-201	Down	9701.81	9476.27	9551.07	4229.52	4211.22	4182.31	218	XLOC_018772	-	-
TCONS_00031215	590.451	860.286	320.616	0.372685	-1.42397	7.7827e-14	7.78789e-13	Down	58.6734	60.0384	55.5227	28.5594	27.1159	23.1004	558	XLOC_018793	-	-
TCONS_00031278	25.6165	0	51.2329	Inf	Inf	5.60361e-08	3.90303e-07	Up	1.09327e-18	0.033984	1.59594e-18	5.3926	9.92721	13.8658	242	XLOC_018831	-	-
TCONS_00031282	72451.8	116741	28162.6	0.24124	-2.05146	0	0	Down	10691.6	10313.2	10560	2959.56	3179.74	3094.13	418	XLOC_018835	-	-
TCONS_00031303	96.4782	149.864	43.0921	0.287541	-1.79816	0.000130437	0.000608978	Down	13.9188	20.0178	20.3489	4.52009	6.25209	8.11916	312	XLOC_018847	-	-
TCONS_00031311	12.9507	0	25.9015	Inf	Inf	0.000253521	0.00112087	Up	1.37003e-06	4.16447e-05	7.13935e-11	1.46968	1.53629	2.65139	625	XLOC_018854	-	-
TCONS_00031314	37997.2	53674.3	22320.2	0.415845	-1.26588	6.22671e-154	2.87578e-152	Down	668.764	662.963	660.519	333.601	336.324	334.392	3045	XLOC_018856	-	-
TCONS_00031318	70313.8	107502	33126	0.308144	-1.69832	6.57599e-300	5.64032e-298	Down	3777.78	3825.28	3773.31	1452.2	1437.54	1359.72	1068	XLOC_018859	-	-
TCONS_00031325	101827	167417	36236.4	0.216444	-2.20793	0	0	Down	8963.83	8725.99	8811.32	2356.99	2264.4	2330.82	714	XLOC_018863	-	-
TCONS_00031462	93.7949	5.03681	182.553	36.2438	5.17966	0.00456004	0.0155207	Up	0.00015549	0.711489	0.662791	42.1721	6.82172	14.5174	391	XLOC_018941	-	-
TCONS_00031513	53.9696	90.0299	17.9093	0.198926	-2.32969	0.000284718	0.00124595	Down	9.58912	10.52	15.9577	4.21888	0	4.401	281	XLOC_018961	-	-
TCONS_00031562	607.048	226.841	987.254	4.35219	2.12174	2.16465e-20	2.82534e-19	Up	31.0192	52.1067	31.7771	221.673	171.025	213.159	223	XLOC_018988	-	-
TCONS_00031563	45.0563	24.6743	65.4383	2.65209	1.40713	0.040026	0.106335	Up	7.41233	6.33856	0.248562	12.8156	14.3179	17.513	201	XLOC_018989	-	-
TCONS_00031921	131.645	40.7142	222.576	5.46679	2.4507	4.98364e-09	3.79718e-08	Up	3.69021	1.62041	11.3829	32.8858	39.641	38.8975	274	XLOC_019182	-	-
TCONS_00031964	6.90509	0	13.8102	Inf	Inf	0.0139784	0.0419213	Up	9.57811e-10	4.52063e-15	5.89817e-21	0.0635565	5.21982	2.67956	238	XLOC_019209	-	-
TCONS_00032087	91.0026	139.79	42.2155	0.301993	-1.72741	0.000347713	0.00149761	Down	15.5298	20.7102	16.14	6.40859	3.9246	8.73837	302	XLOC_019290	-	-
TCONS_00032191	172.146	113.414	230.877	2.0357	1.02552	0.0028407	0.0102993	Up	19.9138	21.2919	21.6482	55.3175	48.4735	51.3179	204	XLOC_019344	-	-
TCONS_00032314	57.6837	88.6507	26.7167	0.30137	-1.73039	0.00448057	0.0153022	Down	15.0255	17.626	16.8132	4.39401	6.81906	6.92437	202	XLOC_019408	-	-
TCONS_00032470	67.6588	121.828	13.4899	0.110729	-3.17489	1.11767e-07	7.67793e-07	Down	8.31833	9.76873	5.26259	0.313235	0.279061	2.52851	591	XLOC_019492	-	-
TCONS_00032554	119.217	186.004	52.4307	0.281879	-1.82685	1.43673e-05	7.71569e-05	Down	4.6538	3.97178	4.85953	1.56655	1.38913	1.63194	1557	XLOC_019548	-	-
TCONS_00032556	5599.58	9389.78	1809.37	0.192696	-2.3756	2.16618e-168	1.08381e-166	Down	1717.19	1810.21	1600.37	373.304	408.568	416.161	207	XLOC_019550	-	-
TCONS_00032557	150212	233397	67026.5	0.287178	-1.79998	6.93482e-66	1.85878e-64	Down	5550.26	5398.06	5829.7	1523.27	1908.96	2413.18	1572	XLOC_019548	-	-
TCONS_00032560	624.696	1084.2	165.191	0.152362	-2.71443	2.04737e-20	2.68393e-19	Down	38.1895	42.2107	28.7136	5.49185	7.76865	6.87779	1124	XLOC_019548	-	-
TCONS_00032561	2394.25	3788.4	1000.09	0.263988	-1.92145	4.22958e-27	6.61312e-26	Down	107.134	109.385	87.4942	24.6089	32.2787	40.4312	1409	XLOC_019548	-	-
TCONS_00032569	184.038	297.813	70.2635	0.235931	-2.08356	1.48693e-09	1.17467e-08	Down	6.70825	6.98127	6.60284	1.83246	2.35844	1.61188	1658	XLOC_019548	-	-
TCONS_00032575	33.4493	65.3769	1.52168	0.0232754	-5.42505	1.22971e-07	8.37092e-07	Down	4.84851	7.22064	2.91793	0.155034	0.160571	0.117352	494	XLOC_019548	-	-
TCONS_00032588	9925.4	16730	3120.79	0.186538	-2.42246	6.42274e-277	4.82026e-275	Down	2955.97	3181.39	3130.67	610.6	735.189	751.543	204	XLOC_019558	-	-
TCONS_00032626	45.7042	18.3324	73.0761	3.98617	1.995	0.00353972	0.0125606	Up	1.11692	1.9323	3.45777e-21	4.96886	5.36664	4.41345	682	XLOC_019582	-	-
TCONS_00032709	22.4373	0	44.8747	Inf	Inf	7.35098e-05	0.000359994	Up	7.75901e-13	3.14549e-17	3.42861e-11	1.29396	10.5817	7.23429	324	XLOC_019633	-	-
TCONS_00032710	84.0704	0	168.141	Inf	Inf	1.0271e-09	8.24423e-09	Up	1.32243e-13	1.22682e-19	1.83585e-14	25.1899	48.709	16.1041	257	XLOC_019633	-	-
TCONS_00032729	5.52123	0	11.0425	Inf	Inf	0.0349727	0.0946692	Up	0	0	0	2.06605	0.903637	1.82164	310	XLOC_019647	-	-
TCONS_00032837	5941.6	8560.44	3322.76	0.388153	-1.3653	1.13654e-80	3.44635e-79	Down	953.292	939.736	927.771	446.781	407.363	472.591	343	XLOC_019701	-	-
TCONS_00032839	3017.42	4573.63	1461.21	0.319486	-1.64618	8.32231e-16	9.08493e-15	Down	862.68	636.126	798.547	294.894	337.717	257.886	225	XLOC_019702	-	-
TCONS_00032841	1479.91	2511.92	447.903	0.178311	-2.48753	1.73648e-81	5.37415e-80	Down	124.75	120.408	124.513	30.3452	34.508	15.1513	768	XLOC_019702	-	-
TCONS_00032842	3269.69	4674.27	1865.11	0.399017	-1.32548	4.19799e-50	9.47546e-49	Down	96.6337	96.2831	95.46	49.8117	45.3351	44.3002	1832	XLOC_019702	-	-
TCONS_00032972	20510	39034.2	1985.89	0.0508758	-4.29688	0	0	Down	1139.82	1207.87	1212.65	73.0544	70.5361	75.9671	1239	XLOC_019808	-	-
TCONS_00032974	487.632	959.738	15.5258	0.0161772	-5.9499	4.07276e-79	1.22264e-77	Down	68.8593	71.7692	53.8793	1.2194	0.221571	2.33441	558	XLOC_019809	-	-
TCONS_00032976	2384.58	42.689	4726.48	110.719	6.79076	0	0	Up	1.49429	1.89143	4.1163	342.338	342.625	325.357	641	XLOC_019809	-	-
TCONS_00032986	27.981	55.962	0	0	#NAME?	0.00046312	0.00196368	Down	13.4051	0.00121622	9.50443	0.000712071	6.57183e-11	3.44295e-16	275	XLOC_019817	-	-
TCONS_00033001	2467.21	1566.54	3367.87	2.14988	1.10425	7.71165e-29	1.25817e-27	Up	74.144	73.8825	67.927	189.201	187.677	185.83	820	XLOC_019831	-	-
TCONS_00033055	24.1788	48.3576	0	0	#NAME?	4.55685e-06	2.65625e-05	Down	11.4057	2.32919	13.1726	0	0	0	203	XLOC_019877	-	-
TCONS_00033076	222.406	304.839	139.974	0.459173	-1.12289	0.000210437	0.000944293	Down	11.6281	11.5082	11.3801	6.05933	6.76577	6.40611	998	XLOC_019895	-	-
TCONS_00033079	420.747	617.531	223.963	0.362674	-1.46325	6.42017e-11	5.63548e-10	Down	24.0691	23.1599	22.723	9.86002	11.3396	9.558	998	XLOC_019898	-	-
TCONS_00033103	583.705	285.384	882.026	3.09066	1.62792	3.20291e-17	3.7268e-16	Up	7.66712	7.58164	8.22241	30.5339	28.6457	28.6925	1375	XLOC_019918	-	-
TCONS_00033106	467.669	205.78	729.559	3.54534	1.82592	6.32544e-17	7.2477e-16	Up	41.5798	41.4492	25.75	150.869	136.491	179.452	214	XLOC_019921	-	-
TCONS_00033135	132.518	234.821	30.2147	0.128671	-2.95824	4.98599e-06	2.88342e-05	Down	18.6319	15.0028	30.5345	0.486027	3.05798	6.47739	413	XLOC_019949	-	-
TCONS_00033136	29.5888	55.2083	3.96927	0.0718963	-3.79794	0.00292054	0.0105378	Down	7.95846	15.7807	3.53068	7.95375e-14	1.89764	0.541489	230	XLOC_019949	-	-
TCONS_00033183	570.641	370.119	771.164	2.08356	1.05905	2.88065e-08	2.0639e-07	Up	41.5922	52.0982	49.0509	116.216	116.118	128.258	293	XLOC_019991	-	-
TCONS_00033242	2764.45	3801.04	1727.87	0.454578	-1.1374	3.19654e-30	5.3609e-29	Down	714.038	654.515	726.835	336.754	449.172	370.132	205	XLOC_020042	-	-
TCONS_00033333	222.004	117.649	326.36	2.77403	1.47198	2.80848e-06	1.66952e-05	Up	26.582	6.14295	18.6628	51.891	65.2387	55.6145	259	XLOC_020101	-	-
TCONS_00033339	467.317	690.544	244.09	0.353474	-1.50032	1.91241e-12	1.78849e-11	Down	91.5237	84.7312	80.4408	40.834	35.0225	34.1574	304	XLOC_020107	-	-
TCONS_00033372	612.751	190.696	1034.81	5.42646	2.44001	1.00094e-35	1.8211e-34	Up	28.1417	24.4515	27.0402	171.902	175.085	176.258	271	XLOC_020127	-	-
TCONS_00033376	124.233	178.463	70.002	0.392249	-1.35016	0.000937762	0.00374855	Down	19.4841	23.7661	22.8809	9.35613	10.128	11.9643	305	XLOC_020130	-	-
TCONS_00033393	142.645	73.6679	211.622	2.87264	1.52238	0.00401198	0.0139398	Up	16.3202	0	13.3829	44.2258	29.8214	29.0027	281	XLOC_020144	-	-
TCONS_00033398	381.572	51.6461	711.498	13.7764	3.78413	6.338e-46	1.34941e-44	Up	2.68392	3.08631	3.52008	49.6319	52.6311	52.9692	628	XLOC_020149	-	-
TCONS_00033441	20.5442	6.79295	34.2954	5.04868	2.33591	0.0284854	0.0785966	Up	0.35122	1.09164	0.718004	4.95415	3.89155	4.47601	352	XLOC_020182	-	-
TCONS_00033557	136.922	88.0631	185.781	2.10963	1.07699	0.0056737	0.0189249	Up	17.0349	11.1332	15.391	31.9716	48.1044	31.1724	229	XLOC_020277	-	-
TCONS_00033607	25.7244	0	51.4488	Inf	Inf	4.25746e-06	2.4914e-05	Up	1.79001e-22	6.0557e-15	3.40611e-18	11.9097	8.5847	2.38082	307	XLOC_020320	-	-
TCONS_00033608	214.18	123.656	304.703	2.46411	1.30107	2.92486e-05	0.000151386	Up	20.5518	32.0679	14.6943	81.8378	59.2201	59.4931	208	XLOC_020320	-	-
TCONS_00033680	57.8366	29.0625	86.6106	2.98014	1.57538	0.00948456	0.0301937	Up	0.734317	0.67765	0.771436	2.62002	2.71481	2.49112	1516	XLOC_020369	-	-
TCONS_00033682	182.952	114.592	251.313	2.19312	1.13298	0.000744164	0.00303118	Up	1.96739	1.91462	2.2231	4.96376	5.30184	6.00535	2119	XLOC_020370	-	-
TCONS_00033683	1726.65	413.076	3040.23	7.35998	2.8797	6.83467e-119	2.63047e-117	Up	9.46738	10.3563	10.5922	92.8767	86.3591	92.0509	1535	XLOC_020371	-	-
TCONS_00033692	868.832	1304.08	433.587	0.332486	-1.58863	1.97478e-23	2.83651e-22	Down	136.474	139.881	142.451	53.6795	59.9901	55.2328	352	XLOC_020377	-	-
TCONS_00033700	868.516	1263.08	473.948	0.37523	-1.41415	4.44774e-19	5.56338e-18	Down	54.7316	56.7168	53.9477	25.212	24.4968	25.5502	863	XLOC_020385	-	-
TCONS_00033717	9.33428	18.6686	0	0	#NAME?	0.00222613	0.00833272	Down	0.123735	4.71268	4.35665	0	0	0	229	XLOC_020401	-	-
TCONS_00033747	145.882	234.119	57.6438	0.246215	-2.02201	1.39893e-07	9.47991e-07	Down	13.3705	11.874	13.4831	3.97672	3.4438	4.10981	684	XLOC_020426	-	-
TCONS_00033849	8.64588	0	17.2918	Inf	Inf	0.00444193	0.0151876	Up	0	0	0	5.06715	0	5.3577	225	XLOC_020472	-	-
TCONS_00033875	47.5425	14.8236	80.2613	5.41441	2.43681	0.000445186	0.00189299	Up	2.29165	2.35362	0.827571	12.6939	11.0831	12.1865	305	XLOC_020494	-	-
TCONS_00034071	1321.88	1774.81	868.954	0.489605	-1.03031	9.44245e-12	8.51239e-11	Down	292.885	341.17	348.834	154.382	230.181	199.984	204	XLOC_020623	-	-
TCONS_00034193	874.99	0	1749.98	Inf	Inf	8.77736e-07	5.43291e-06	Up	6.55034e-30	8.73238e-21	0	0	649.019	500.063	210	XLOC_020700	-	-
TCONS_00034195	629.338	1258.68	0	0	#NAME?	1.05233e-05	5.76475e-05	Down	0	238.268	436.752	9.17723e-26	8.23199e-10	4.15895e-27	210	XLOC_020700	-	-
TCONS_00034199	10080.7	2477.08	17684.3	7.13918	2.83576	0.0292797	0.0804187	Up	539.041	549.625	252.862	675.627	4156.91	6795.77	209	XLOC_020700	-	-
TCONS_00034201	2373.82	0	4747.63	Inf	Inf	0	0	Up	9.26675e-31	0	0.0178701	954.266	973.882	1083.41	216	XLOC_020700	-	-
TCONS_00034206	180.619	360.634	0.603615	0.00167376	-9.22269	0.000550168	0.0022939	Down	63.9391	130.682	0	0	0.300029	2.94788e-28	210	XLOC_020700	-	-
TCONS_00034207	1519.3	0	3038.6	Inf	Inf	1.96814e-07	1.31883e-06	Up	5.54642e-19	2.39794e-09	0	1.95665e-21	951.41	1060.47	208	XLOC_020700	-	-
TCONS_00034209	365.162	0	730.325	Inf	Inf	6.64938e-05	0.000327774	Up	0	0	0	321.875	155.131	9.17018e-28	209	XLOC_020700	-	-
TCONS_00034212	2650.38	1445.78	3854.98	2.66637	1.41488	0.0444696	0.116229	Up	524.409	264.288	4.83524e-09	605.258	1263.49	678.454	208	XLOC_020700	-	-
TCONS_00034214	528.767	0	1057.53	Inf	Inf	0.0206394	0.0598065	Up	5.02349e-11	0	0	1.01028e-26	685.371	3.12637e-22	214	XLOC_020700	-	-
TCONS_00034217	1527.41	0	3054.82	Inf	Inf	6.57461e-27	1.01737e-25	Up	1.41028e-34	0	0	954.043	490.676	533.737	211	XLOC_020700	-	-
TCONS_00034220	5.53976	0	11.0795	Inf	Inf	0.0346711	0.0939375	Up	9.06268e-28	0	0	2.03873	1.95489	3.06773	216	XLOC_020700	-	-
TCONS_00034221	14009.1	5225.95	22792.2	4.36136	2.12478	0.00861659	0.0277246	Up	377.796	1146.28	1394.61	1866.85	6761.26	6885.03	202	XLOC_020700	-	-
TCONS_00034224	5468.99	1945.7	8992.28	4.62162	2.2084	0.00495252	0.0167615	Up	0	7.64466e-21	1040.06	1110.02	2248.8	2520.1	210	XLOC_020700	-	-
TCONS_00034225	563.274	0	1126.55	Inf	Inf	1.29345e-06	7.89176e-06	Up	1.84915e-23	0	0	0	359.405	386.49	208	XLOC_020700	-	-
TCONS_00034296	117.979	226.241	9.7158	0.0429444	-4.54139	1.12733e-19	1.434e-18	Down	24.5414	35.0704	26.2349	1.86528	1.75625	0.798173	298	XLOC_020747	-	-
TCONS_00034389	278.493	145.896	411.09	2.8177	1.49452	4.80472e-08	3.37793e-07	Up	7.21303	9.57062	12.1759	37.3554	32.2238	29.1585	570	XLOC_020810	-	-
TCONS_00034461	82.7632	0	165.526	Inf	Inf	1.84415e-24	2.71379e-23	Up	0.00080317	2.22767e-12	1.41439e-05	18.7283	30.9983	25.8536	301	XLOC_020853	-	-
TCONS_00034483	1365.5	1843.73	887.27	0.481237	-1.05518	1.32937e-16	1.50595e-15	Down	18.6941	18.1295	18.9901	10.8896	11.5329	10.1594	3733	XLOC_020863	-	-
TCONS_00034519	44.4862	84.4453	4.52711	0.05361	-4.22135	0.000187058	0.000845705	Down	15.3065	9.62529	4.00401	1.20532e-19	1.91349	3.06398e-16	331	XLOC_020896	-	-
TCONS_00034551	29.1825	54.0687	4.29635	0.079461	-3.65361	0.000141651	0.000656404	Down	5.63251	6.2546	2.16108	0.416817	0.442923	0.487749	437	XLOC_020921	-	-
TCONS_00034670	597.999	810.133	385.865	0.476298	-1.07006	9.28126e-09	6.9183e-08	Down	41.2719	36.3161	37.2873	22.0069	21.2887	23.0479	797	XLOC_020996	-	-
TCONS_00034685	148.51	218.945	78.075	0.356596	-1.48764	7.67869e-05	0.000374212	Down	28.9603	34.4451	24.6722	13.4968	12.0673	12.4374	281	XLOC_021003	-	-
TCONS_00034742	13.9557	1.74404	26.1674	15.0039	3.90727	0.023755	0.067276	Up	0.132865	0.15078	0.265084	1.87196	1.22373	6.2266	386	XLOC_021046	-	-
TCONS_00034745	76.1542	152.308	0	0	#NAME?	1.26928e-23	1.8497e-22	Down	20.7912	11.3973	19.7218	7.36139e-27	4.69012e-26	1.6633e-28	331	XLOC_021049	-	-
TCONS_00034753	698.048	171.891	1224.21	7.12199	2.83228	2.50038e-51	5.68646e-50	Up	9.61119	6.87013	8.72772	74.9381	72.1858	70.6408	770	XLOC_021056	-	-
TCONS_00034811	38.2915	0	76.583	Inf	Inf	1.17315e-11	1.05443e-10	Up	0	0	0	9.88718	11.2796	10.6828	329	XLOC_021102	-	-
TCONS_00034876	185.942	327.197	44.6859	0.136572	-2.87227	1.84444e-09	1.44948e-08	Down	41.4642	24.2877	26.7197	6.17591	4.03003	4.97706	400	XLOC_021142	-	-
TCONS_00034878	30.3504	59.1984	1.50249	0.0253807	-5.30013	1.9343e-06	1.16602e-05	Down	3.35468	9.35722	10.997	0.661012	1.19832e-17	6.78464e-16	282	XLOC_021142	-	-
TCONS_00034981	20.3565	39.4448	1.26826	0.0321527	-4.95892	9.21623e-05	0.000441821	Down	5.83307	2.7017	6.54904	0.00591418	7.8886e-17	0.643723	295	XLOC_021208	-	-
TCONS_00035009	726.546	1037.82	415.277	0.400145	-1.32141	9.89446e-15	1.03857e-13	Down	148.53	135.606	159.923	62.7342	69.1054	83.6064	264	XLOC_021231	-	-
TCONS_00035039	103.058	0	206.116	Inf	Inf	0.0151941	0.0451163	Up	1.91763e-18	4.27904e-18	1.14519e-18	78.2206	2.11972e-15	9.74395	318	XLOC_021251	-	-
TCONS_00035093	70.1717	115.378	24.9657	0.216382	-2.20835	9.07447e-05	0.000435865	Down	8.95711	10.4345	10.0526	2.98545	3.09451	1.68991	443	XLOC_021296	-	-
TCONS_00035095	17.5745	0	35.149	Inf	Inf	1.13671e-05	6.20438e-05	Up	4.28088e-26	1.45805e-49	1.12833e-23	7.10874	9.5664	6.74856	205	XLOC_021298	-	-
TCONS_00035101	210.204	289.652	130.756	0.451425	-1.14744	0.000381758	0.0016372	Down	47.5254	53.409	51.9742	46.3292	19.8731	17.2696	214	XLOC_021302	-	-
TCONS_00035112	47.9373	84.6702	11.2043	0.132329	-2.9178	0.00387011	0.0135242	Down	11.1882	9.22367	2.4074	1.75639	1.52513	0.369455	421	XLOC_021310	-	-
TCONS_00035113	176.196	80.3446	272.047	3.38601	1.75958	0.0175452	0.0512361	Up	11.8628	6.31741	19.4138	75.0209	56.966	22.442	241	XLOC_021310	-	-
TCONS_00035151	39.5144	21.1503	57.8785	2.73653	1.45235	0.0474164	0.12271	Up	1.3888	1.66281	1.13447	4.23396	5.00037	4.49792	574	XLOC_021341	-	-
TCONS_00035182	338.679	153.909	523.45	3.40104	1.76598	6.63181e-10	5.38073e-09	Up	34.9015	22.6091	11.6851	109.971	84.5401	89.6881	252	XLOC_021365	-	-
TCONS_00035231	6.18021	0	12.3604	Inf	Inf	0.0227991	0.064998	Up	0	0	0	2.6	1.33038	4.04765	210	XLOC_021409	-	-
TCONS_00035355	66.7026	42.0657	91.3395	2.17136	1.1186	0.0426668	0.111963	Up	2.12903	2.73971	1.68777	6.03259	5.21918	6.05329	722	XLOC_021488	-	-
TCONS_00035360	9.84526	1.04576	18.6448	17.8289	4.15615	0.023294	0.0662202	Up	0.178064	0.0506401	0	1.72359	2.34628	1.68542	439	XLOC_021493	-	-
TCONS_00035401	56.9772	28.987	84.9675	2.93122	1.5515	0.0110343	0.03422	Up	2.2739	3.00434	8.46036	15.8517	22.587	10.599	238	XLOC_021523	-	-
TCONS_00035462	9172.35	5400.12	12944.6	2.39709	1.26129	1.44955e-89	4.62931e-88	Up	678.803	711.768	706.592	2027.79	2064.29	2003.04	291	XLOC_021570	-	-
TCONS_00035463	30.9714	0	61.9428	Inf	Inf	4.59017e-09	3.52421e-08	Up	1.80474e-06	0.0178316	1.51884e-13	4.72995	14.4624	9.90687	292	XLOC_021570	-	-
TCONS_00035564	39.8998	19.6011	60.1985	3.07117	1.61879	0.0228503	0.065082	Up	0.132465	6.15445	3.38441	14.5588	14.3194	6.71344	231	XLOC_021659	-	-
TCONS_00035583	109.041	67.7724	150.31	2.21786	1.14917	0.0483985	0.124714	Up	14.5626	4.34629	7.45988	33.9755	16.0071	21.077	289	XLOC_021677	-	-
TCONS_00035613	24.1011	1.12497	47.0773	41.8475	5.38707	9.76565e-06	5.37917e-05	Up	0	0.478466	0	5.31887	13.5407	7.45697	246	XLOC_021704	-	-
TCONS_00035614	12.9612	1.73487	24.1876	13.942	3.80137	0.0126311	0.0383791	Up	0.185933	0.126593	0.225663	3.4214	3.24858	3.21762	339	XLOC_021705	-	-
TCONS_00035621	24.4422	45.5034	3.38091	0.0743001	-3.75049	0.00302168	0.0108506	Down	3.36532	5.01276	11.8593	3.42116e-19	1.14685	0.607633	253	XLOC_021710	-	-
TCONS_00035661	3396.17	1563.26	5229.07	3.34498	1.742	3.02608e-85	9.46279e-84	Up	18.4844	19.073	18.682	76.456	75.8219	75.8175	3141	XLOC_021747	-	-
TCONS_00035844	129.191	191.134	67.2467	0.35183	-1.50705	0.00017761	0.000806632	Down	14.401	13.6117	12.4981	5.62339	6.62118	5.02198	533	XLOC_021855	-	-
TCONS_00035884	20402.9	37467.9	3337.99	0.0890893	-3.4886	0	0	Down	1038.65	990.241	1024.17	110.842	107.877	110.984	1387	XLOC_021892	-	-
TCONS_00035903	155.86	81.6845	230.036	2.81615	1.49372	4.67046e-05	0.000235247	Up	14.8052	11.5961	14.8816	55.1262	49.4874	36.6617	223	XLOC_021911	-	-
TCONS_00036016	374.911	652.337	97.4855	0.14944	-2.74236	5.58899e-28	8.87733e-27	Down	56.739	55.8375	52.0528	8.44277	11.0655	10.3271	448	XLOC_021993	-	-
TCONS_00036018	58422.9	99042.6	17803.3	0.179754	-2.4759	0	0	Down	5476.33	5300.77	5399.06	1145.57	1204.81	1175.13	692	XLOC_021995	-	-
TCONS_00036065	6.24959	0	12.4992	Inf	Inf	0.0214213	0.0617196	Up	0	0	0	3.71078	1.8669	1.95622	226	XLOC_022041	-	-
TCONS_00036082	31.6195	48.9263	14.3127	0.292535	-1.77332	0.0344346	0.0933808	Down	1.38677	1.75425	1.86267	0.692577	0.666217	0.393693	1102	XLOC_022051	-	-
TCONS_00036115	165.024	107.323	222.725	2.07528	1.05331	0.00274723	0.0100087	Up	14.1405	11.6528	12.796	39.8441	31.8825	25.4116	314	XLOC_022073	-	-
TCONS_00036131	212.016	328.669	95.3625	0.290147	-1.78514	1.75668e-08	1.27381e-07	Down	10.5625	9.75319	9.83327	3.62344	3.87092	3.1034	1233	XLOC_022088	-	-
TCONS_00036132	16984.9	26649.2	7320.55	0.274701	-1.86407	3.3421e-249	2.3888e-247	Down	817.539	818.19	807.084	273.736	272.626	267.055	1233	XLOC_022089	-	-
TCONS_00036147	80.7512	147.493	14.0095	0.0949845	-3.39616	1.03384e-09	8.27626e-09	Down	32.4392	19.7073	22.9244	3.66911	3.10537	1.91806	222	XLOC_022103	-	-
TCONS_00036175	153.868	81.8037	225.933	2.76189	1.46566	0.0004721	0.00199894	Up	19.3855	21.5806	4.42125	52.6019	62.4309	36.7035	204	XLOC_022123	-	-
TCONS_00036308	203.978	88.7756	319.181	3.59537	1.84614	1.27206e-08	9.35959e-08	Up	3.94799	3.82025	3.32813	16.2331	16.8512	15.2926	904	XLOC_022229	-	-
TCONS_00036316	187.669	262.946	112.392	0.427435	-1.22622	0.000215315	0.000964738	Down	20.7718	22.658	20.4472	11.4668	10.6591	10.9871	465	XLOC_022235	-	-
TCONS_00036364	546.509	1023.78	69.2393	0.0676311	-3.88617	1.4643e-67	4.03287e-66	Down	125.208	144.17	118.951	10.253	10.7822	10.7515	298	XLOC_022278	-	-
TCONS_00036366	408.416	146.894	669.938	4.5607	2.18925	7.2239e-21	9.76853e-20	Up	12.0578	16.8896	13.9	76.2182	78.7574	81.6838	388	XLOC_022280	-	-
TCONS_00036374	58.1157	5.32342	110.908	20.834	4.38087	7.02e-10	5.68034e-09	Up	0.412484	0.904029	0.839204	15.9483	19.3405	17.9921	285	XLOC_022288	-	-
TCONS_00036402	103.136	158.835	47.4375	0.298658	-1.74343	0.000112557	0.00053296	Down	25.9729	20.1715	25.6824	5.4799	12.5556	8.0532	250	XLOC_022312	-	-
TCONS_00036429	4520.61	7450.02	1591.21	0.213584	-2.22712	1.50655e-164	7.17882e-163	Down	186.897	181.001	181.026	51.7057	46.3218	44.0397	1534	XLOC_022331	-	-
TCONS_00036433	124.919	225.515	24.3223	0.107852	-3.21288	3.16073e-13	3.01223e-12	Down	21.2983	17.8131	20.2479	2.80017	1.50955	3.38975	429	XLOC_022334	-	-
TCONS_00036525	143.749	215.333	72.1663	0.335139	-1.57717	0.00277243	0.0100639	Down	50.5659	33.6337	21.8204	17.3203	12.3622	13.1128	230	XLOC_022392	-	-
TCONS_00036551	76.6635	112.222	41.1049	0.366281	-1.44898	0.00553847	0.0185563	Down	13.6235	10.7158	9.99443	8.14513	3.49131	3.46964	370	XLOC_022418	-	-
TCONS_00036556	2137.83	3158.62	1117.03	0.353646	-1.49962	3.16774e-45	6.69687e-44	Down	57.741	60.814	60.996	24.0062	26.1333	26.8785	1988	XLOC_022422	-	-
TCONS_00036587	138.896	204.857	72.9347	0.356027	-1.48994	0.000119955	0.000562662	Down	28.5122	28.988	23.7789	11.057	12.0143	12.087	285	XLOC_022446	-	-
TCONS_00036817	214.629	99.999	329.26	3.29263	1.71924	4.72099e-08	3.33468e-07	Up	2.97275	2.98889	2.9609	12.0546	12.3838	11.2455	1264	XLOC_022636	-	-
TCONS_00036819	49.4181	16.8578	81.9784	4.86294	2.28183	0.00085269	0.00342523	Up	1.00137	0.28104	0.609675	3.50651	4.40173	3.48778	987	XLOC_022638	-	-
TCONS_00036937	8.84688	0.74998	16.9438	22.5923	4.49776	0.0234544	0.0666132	Up	5.79213e-40	0.267437	7.50505e-40	0.690947	4.00765	3.44022	287	XLOC_022713	-	-
TCONS_00036991	59694.2	81036.8	38351.7	0.473262	-1.07929	2.155e-123	8.51225e-122	Down	3338.53	3400.97	3325.34	1890.85	1940.22	1943.62	910	XLOC_022751	-	-
TCONS_00037047	47.4191	0	94.8381	Inf	Inf	2.76927e-14	2.84703e-13	Up	0	0	0	16.8292	22.1612	22.967	210	XLOC_022789	-	-
TCONS_00037136	1649.26	2453.83	844.695	0.344236	-1.53853	2.51401e-38	4.93273e-37	Down	380.378	342.834	339.57	168.11	135.225	139.606	261	XLOC_022862	-	-
TCONS_00037137	5720.87	7892.07	3549.66	0.449775	-1.15272	2.59103e-57	6.4819e-56	Down	1167.61	1129.71	1173.38	598.926	643.471	650.275	257	XLOC_022862	-	-
TCONS_00037149	67.3465	97.4363	37.2568	0.382371	-1.38695	0.0143262	0.0427933	Down	8.77321	15.4242	8.34803	3.32727	7.71941	3.91861	339	XLOC_022869	-	-
TCONS_00037169	106.476	62.2535	150.698	2.42072	1.27543	0.0037777	0.013295	Up	7.19602	6.39266	7.95605	23.0051	24.2918	16.0588	326	XLOC_022878	-	-
TCONS_00037178	317.839	152.045	483.632	3.18084	1.66941	1.35206e-10	1.16635e-09	Up	25.2247	21.8454	29.2122	97.1331	99.0355	98.3973	225	XLOC_022887	-	-
TCONS_00037187	81.9244	0	163.849	Inf	Inf	6.29847e-06	3.58106e-05	Up	1.10233e-26	3.64074e-21	3.89446e-28	56.7802	45.2648	4.77579	210	XLOC_022896	-	-
TCONS_00037313	81.6725	115.142	48.2034	0.418644	-1.2562	0.0140402	0.0420225	Down	16.0289	23.8485	14.7325	3.44187	6.98179	17.3098	238	XLOC_022982	-	-
TCONS_00037322	89.1838	37.3705	140.997	3.77296	1.91569	9.2279e-05	0.000441821	Up	3.69131	4.34688	3.04591	19.5937	17.9587	13.5992	378	XLOC_022991	-	-
TCONS_00037350	564.267	781.924	346.61	0.443279	-1.17371	1.07976e-09	8.62087e-09	Down	59.1585	60.6613	70.5097	30.5131	36.85	35.0402	464	XLOC_023017	-	-
TCONS_00037352	15.9082	31.8165	0	0	#NAME?	2.34291e-05	0.000122747	Down	5.35878	0.92347	4.31983	8.66394e-19	1.18474e-18	4.91541e-23	343	XLOC_023018	-	-
TCONS_00037625	100.925	5.85742	195.992	33.4604	5.06438	5.94942e-15	6.31101e-14	Up	1.37691e-24	6.62421e-24	2.20622	39.212	21.992	27.4674	302	XLOC_023208	-	-
TCONS_00037662	114.064	172.912	55.2158	0.31933	-1.64688	0.000118608	0.000557217	Down	9.09057	8.03327	8.73661	2.89964	3.48133	3.6337	756	XLOC_023237	-	-
TCONS_00037734	102.386	156.908	47.8644	0.305048	-1.71289	0.000156415	0.000716883	Down	14.3299	13.3009	14.8084	5.39145	4.5232	5.77346	418	XLOC_023306	-	-
TCONS_00037735	23.5174	40.8527	6.18217	0.151328	-2.72425	0.00720083	0.0234711	Down	4.0887	5.3443	5.49677	0.63302	0.632469	1.43434	309	XLOC_023306	-	-
TCONS_00037881	787.885	399.382	1176.39	2.94553	1.55853	1.11412e-20	1.4799e-19	Up	41.044	42.046	48.6961	148.476	156.642	166.266	342	XLOC_023406	-	-
TCONS_00037923	69.956	44.6459	95.2661	2.13381	1.09343	0.0457639	0.119256	Up	2.64104	1.95781	2.75883	5.52385	7.20541	6.34948	684	XLOC_023437	-	-
TCONS_00037942	243.558	376.542	110.574	0.293656	-1.7678	2.61697e-09	2.04587e-08	Down	31.7737	36.8397	32.7793	12.9495	12.9509	10.0824	420	XLOC_023448	-	-
TCONS_00037953	768.163	1103.7	432.624	0.391975	-1.35116	7.35056e-16	8.05343e-15	Down	17.2644	17.8409	17.6237	8.15092	8.75616	8.16287	2365	XLOC_023459	-	-
TCONS_00037956	261.018	353.492	168.544	0.476797	-1.06855	0.000136332	0.000634526	Down	8.73528	9.11939	7.89584	4.84532	4.9171	5.11918	1552	XLOC_023461	-	-
TCONS_00038062	647.83	0	1295.66	Inf	Inf	3.81914e-181	2.01141e-179	Up	2.75385e-06	5.28897e-11	4.05376e-12	176.86	223.156	198.196	297	XLOC_023539	-	-
TCONS_00038064	11.6407	23.2814	0	0	#NAME?	0.0283037	0.0783272	Down	8.6152	2.04502	2.33525e-08	8.7331e-22	1.29226e-15	9.62302e-17	248	XLOC_023540	-	-
TCONS_00038302	20.9291	0	41.8583	Inf	Inf	0.00981592	0.0310837	Up	0	8.80806e-56	0	15.808	4.59456	0.55173	273	XLOC_023720	-	-
TCONS_00038307	75.9665	136.307	15.6259	0.114638	-3.12485	0.000172069	0.000783842	Down	10.3082	18.4667	26.8952	7.62526	1.62362e-13	3.34153e-06	276	XLOC_023720	-	-
TCONS_00038311	63.6564	0	127.313	Inf	Inf	5.62867e-19	6.98234e-18	Up	1.57105e-27	0	0	22.0454	25.8654	21.9594	250	XLOC_023720	-	-
TCONS_00038341	31.4357	13.1928	49.6787	3.7656	1.91288	0.0244303	0.0689284	Up	2.22434	1.19094	1.13154	7.82775	5.17391	7.43265	332	XLOC_023749	-	-
XR_002302540.2	8.77459	16.6438	0.905423	0.0544001	-4.20025	0.032951	0.0897703	Down	0.300065	2.67943	1.47651	0	0.288499	0	423	110091998	LOC110091998	uncharacterized LOC110091998
XR_002302545.2	88.8199	30.3128	147.327	4.86023	2.28102	6.00207e-06	3.43859e-05	Up	4.11928	2.95305	4.20968	18.1775	26.7219	22.0394	302	110092033	LOC110092033	uncharacterized LOC110092033
XR_002302645.2	19.4971	38.9941	0	0	#NAME?	0.00318678	0.0114025	Down	0.61833	2.99959	0.549672	1.53182e-16	1.88727e-12	0.0127634	1062	110092920	LOC110092920	uncharacterized LOC110092920, transcript variant X2
XR_002302649.2	127.379	23.0436	231.714	10.0555	3.32991	5.42975e-14	5.46984e-13	Up	1.45613	2.33296	1.49183	21.5014	20.1686	22.3301	496	110092951	LOC110092951	uncharacterized LOC110092951
XR_002302732.2	4315.84	1426.1	7205.57	5.05263	2.33703	1.52061e-172	7.73705e-171	Up	26.5752	27.7549	25.6053	156.046	164.165	169.562	2016	110093555	LOC110093555	uncharacterized LOC110093555, transcript variant X2
XR_002302737.2	109.945	177.853	42.0376	0.236362	-2.08093	2.71505e-06	1.62039e-05	Down	27.3754	22.1985	17.0195	5.91037	6.08497	7.05696	302	110093616	LOC110093616	uncharacterized LOC110093616
XR_002302757.2	2200.38	603.667	3797.09	6.29004	2.65307	7.30262e-127	2.92299e-125	Up	39.4936	37.8691	42.7533	293.055	305.769	317.213	568	110093873	LOC110093873	uncharacterized LOC110093873
XR_002302810.2	43.1785	84.4864	1.87056	0.0221404	-5.49718	9.10129e-10	7.32495e-09	Down	5.29053	7.54517	9.21505	0.113535	0.117483	0.362117	434	110094060	LOC110094060	uncharacterized LOC110094060
XR_002302860.2	166.976	274.229	59.7233	0.217786	-2.19902	1.41532e-09	1.12105e-08	Down	15.5003	16.744	14.6192	4.25621	3.98708	4.09665	662	110094387	LOC110094387	uncharacterized LOC110094387
XR_002302948.2	19.9037	36.4775	3.3299	0.0912865	-3.45345	0.00299855	0.0107933	Down	1.75677	1.73706	1.7909	0.200491	0.298603	0.0519212	782	110095251	LOC110095251	uncharacterized LOC110095251
XR_002302966.2	1073.37	421.987	1724.75	4.0872	2.03111	3.51844e-43	7.23449e-42	Up	12.7371	12.2691	11.4256	57.8543	59.802	62.7627	1310	110095474	LOC110095474	uncharacterized LOC110095474, transcript variant X2
XR_002302979.2	238.75	111.052	366.448	3.29978	1.72237	1.0563e-08	7.82966e-08	Up	7.69227	5.12171	7.0507	25.215	25.803	28.3297	633	110095611	LOC110095611	uncharacterized LOC110095611
XR_002302998.2	13.202	1.01532	25.3887	25.0055	4.64417	0.00411058	0.0142002	Up	0.020319	0	0.0092956	0.279688	0.537219	0.348591	2990	110095738	LOC110095738	uncharacterized LOC110095738, transcript variant X4
XR_002303019.2	147.914	32.8263	263.001	8.01191	3.00215	1.13447e-07	7.77554e-07	Up	3.53078e-08	9.43864	2.11939	23.6889	45.6891	43.4938	320	110095875	LOC110095875	uncharacterized LOC110095875, transcript variant X1
XR_002303042.2	384.778	672.81	96.7468	0.143795	-2.79791	2.97521e-29	4.90746e-28	Down	43.5105	51.0217	46.7786	10.7406	10.3931	3.50652	538	110096065	LOC110096065	uncharacterized LOC110096065
XR_002303062.2	84.5329	142.428	26.6378	0.187026	-2.41869	2.7384e-06	1.63109e-05	Down	2.2276	2.25785	2.34379	0.412591	0.631953	0.497746	2353	110096185	LOC110096185	uncharacterized LOC110096185, transcript variant X2
XR_002303098.2	32.6659	6.88153	58.4503	8.49379	3.08641	0.000477488	0.0020189	Up	0.382197	0.107472	0.196309	2.26682	2.75418	2.27651	1099	110096554	LOC110096554	uncharacterized LOC110096554
XR_002303123.2	88.0944	43.8341	132.355	3.01945	1.59428	0.000993514	0.00394515	Up	1.11456	2.81923	2.03324	6.72984	6.61526	8.33175	836	110096652	LOC110096652	uncharacterized LOC110096652
XR_002303219.2	112.537	179.685	45.3889	0.252602	-1.98506	6.0938e-06	3.47787e-05	Down	1.20078	1.47357	1.27298	0.431743	0.33295	0.442058	5150	110097639	LOC110097639	uncharacterized LOC110097639
XR_002303264.2	25.2615	5.30508	45.2179	8.5235	3.09145	0.00207607	0.00780257	Up	0.186069	0.250456	0.13741	0.973894	2.60638	2.43859	1026	110097823	LOC110097823	uncharacterized LOC110097823
XR_002303293.2	8.23488	0	16.4698	Inf	Inf	0.00572128	0.0190625	Up	0.0116441	4.73835e-11	0.00173009	0.657996	0.71118	0.467452	1211	110098039	LOC110098039	uncharacterized LOC110098039, transcript variant X7
XR_002303327.2	175.487	306.17	44.8046	0.146339	-2.77261	3.2726e-14	3.31904e-13	Down	16.5078	18.5788	15.3991	3.60358	3.1731	2.14157	686	110098234	LOC110098234	uncharacterized LOC110098234
XR_002303387.2	118.273	185.59	50.9553	0.274558	-1.86481	3.12296e-05	0.000160533	Down	42.1079	31.5705	40.9842	11.0396	26.9963	0.168826	183	110098813	LOC110098813	uncharacterized LOC110098813
XR_002303393.2	70.658	11.2809	130.035	11.527	3.52694	5.67286e-09	4.27887e-08	Up	0.440393	0.493348	0.298214	5.444	6.05046	6.4174	997	110098829	LOC110098829	uncharacterized LOC110098829, transcript variant X2
XR_002303400.2	37.2666	69.4248	5.10848	0.0735829	-3.76449	1.02652e-05	5.63367e-05	Down	3.53918	3.86822	5.12649	1.10668	0	0	623	110098882	LOC110098882	uncharacterized LOC110098882
XR_002303421.1	50.3467	12.7485	87.9448	6.89844	2.78627	5.81907e-05	0.00028922	Up	4.16707e-13	3.77968e-06	7.32656	24.0336	20.6667	17.225	195	110099227	LOC110099227	uncharacterized LOC110099227
XR_002303443.2	119.781	44.7612	194.802	4.35202	2.12168	7.19509e-07	4.49993e-06	Up	1.3818	1.73779	1.47049	7.58404	7.12149	9.66779	1094	110099402	LOC110099402	uncharacterized LOC110099402
XR_002303483.2	313.727	427.293	200.162	0.468442	-1.09406	1.75495e-05	9.34104e-05	Down	33.7085	33.1911	42.1235	19.3264	21.0459	21.5283	443	110099740	LOC110099740	uncharacterized LOC110099740
XR_002303492.2	107.992	199.357	16.6276	0.0834061	-3.5837	1.80344e-13	1.72969e-12	Down	17.4016	18.3217	14.5484	1.4416	1.43084	2.22457	448	110099843	LOC110099843	uncharacterized LOC110099843
XR_002303494.2	360.902	573.547	148.256	0.25849	-1.95182	1.7753e-15	1.91707e-14	Down	30.3127	28.5104	27.5007	9.46714	8.39455	9.11995	751	110099894	LOC110099894	uncharacterized LOC110099894
XR_002303591.2	62.9119	5.85976	119.964	20.4725	4.35562	1.17678e-10	1.01807e-09	Up	0.320801	1.77265	0.330721	18.8357	19.8912	17.9196	290	110100873	LOC110100873	uncharacterized LOC110100873
XR_002303601.2	48.658	0	97.3159	Inf	Inf	1.71204e-11	1.52962e-10	Up	2.78969e-20	5.68137e-19	6.50632e-16	8.62	12.6436	20.9889	316	110100962	LOC110100962	uncharacterized LOC110100962
XR_002303623.2	24.1123	40.871	7.35365	0.179923	-2.47455	0.0126108	0.0383562	Down	0.160616	0.227951	0.244905	0.0506585	0.0430716	0.0453184	7263	110101087	LOC110101087	uncharacterized LOC110101087, transcript variant X2
XR_002303625.2	35.9333	61.7714	10.0952	0.163428	-2.61327	0.00126966	0.00493719	Down	0.240099	0.3683	0.367012	0.0729605	0.058428	0.0634642	7157	110101087	LOC110101087	uncharacterized LOC110101087, transcript variant X1
XR_002303634.2	60.8376	96.5318	25.1435	0.260469	-1.94082	0.00122121	0.00477699	Down	6.56922	10.054	8.18949	3.38036	1.58767	2.84139	439	110101176	LOC110101176	uncharacterized LOC110101176, transcript variant X1
XR_002303635.2	6550.67	3313.24	9788.09	2.95423	1.56278	1.54275e-109	5.51349e-108	Up	44.064	40.5944	43.2683	150.354	156.148	151.739	2927	110101176	LOC110101176	uncharacterized LOC110101176, transcript variant X2
XR_002303745.2	44.9172	1.00615	88.8283	88.285	6.4641	4.0948e-11	3.62613e-10	Up	0.224236	1.84424e-27	1.17791e-14	10.5892	8.2851	9.71066	426	110101774	LOC110101774	uncharacterized LOC110101774
XR_002303747.2	28.8838	7.23818	50.5295	6.98096	2.80343	0.00257816	0.00948485	Up	1.84577	0.649097	0.605279	7.79266	6.66761	11.888	262	110101798	LOC110101798	uncharacterized LOC110101798
XR_002303785.2	99.598	137.11	62.0859	0.452818	-1.143	0.0123395	0.0377222	Down	9.15481	11.7356	10.4527	5.10482	6.9392	5.19948	494	110102220	LOC110102220	uncharacterized LOC110102220
XR_002303845.2	680.842	304.813	1056.87	3.46727	1.7938	2.39137e-23	3.40232e-22	Up	2.03877	2.41192	2.18417	8.55516	9.01424	10.3445	5189	110102554	LOC110102554	uncharacterized LOC110102554
XR_002303890.2	106.667	57.1344	156.2	2.7339	1.45096	0.00103241	0.0040834	Up	1.22358	1.29464	1.6528	4.14869	5.72656	4.02724	1542	110102871	LOC110102871	uncharacterized LOC110102871
XR_002303903.2	8.51219	0	17.0244	Inf	Inf	0.00487361	0.0165317	Up	0	0	0.0178481	2.58415	0.0104487	3.29113	394	110103030	LOC110103030	uncharacterized LOC110103030
XR_002303921.2	6.72345	0	13.4469	Inf	Inf	0.0156838	0.0464326	Up	0	0	0	1.00985	1.75046	1.0678	482	110103254	LOC110103254	uncharacterized LOC110103254
XR_002303972.2	65842.3	29724.4	101960	3.43018	1.77829	0	0	Up	272.716	272.865	272.405	1099.48	1134.2	1168.02	4107	110103610	LOC110103610	uncharacterized LOC110103610
XR_002304077.2	9.40659	0	18.8132	Inf	Inf	0.00259685	0.009532	Up	2.12557e-09	0.00392244	1.06082e-15	0.823462	2.05769	0.421971	778	110104817	LOC110104817	uncharacterized LOC110104817, transcript variant X1
XR_002304110.2	298.096	428.31	167.882	0.391964	-1.35121	3.50217e-07	2.27074e-06	Down	25.8252	27.0972	24.1618	13.0256	13.8855	9.72616	628	110105034	LOC110105034	uncharacterized LOC110105034
XR_002304112.2	31.8207	6.62828	57.0131	8.6015	3.10459	0.000505472	0.00212525	Up	0.917939	0.603893	0.189299	7.04193	4.38997	6.32551	441	110105069	LOC110105069	uncharacterized LOC110105069
XR_002304116.2	8.4065	0	16.813	Inf	Inf	0.0222244	0.0636618	Up	1.87178e-18	4.1919e-17	1.76699e-19	8.15123e-15	4.83522	1.73209	357	110105144	LOC110105144	uncharacterized LOC110105144
XR_002304171.2	305.71	130.601	480.818	3.68157	1.88032	1.59205e-12	1.49354e-11	Up	9.38909	10.2423	11.4154	43.2192	51.6129	43.9516	475	110105698	LOC110105698	uncharacterized LOC110105698, transcript variant X2
XR_002304216.2	124.11	237.511	10.7093	0.0450897	-4.47106	1.81248e-20	2.38643e-19	Down	16.4496	11.2038	15.4746	0.339417	1.372	0.715632	622	110106263	LOC110106263	uncharacterized LOC110106263
XR_002304246.2	27.0019	43.585	10.4188	0.239046	-2.06464	0.0225235	0.0643343	Down	2.95338	1.3239	2.04486	0.437392	0.790287	0.635975	783	110106508	LOC110106508	uncharacterized LOC110106508
XR_002304265.2	56.3116	88.5132	24.11	0.272388	-1.87626	0.00253765	0.00935876	Down	7.07127	6.98067	5.54893	2.31408	2.4997	1.72974	509	110106608	LOC110106608	uncharacterized LOC110106608
XR_002304274.2	419.871	209.012	630.73	3.01768	1.59344	4.08487e-09	3.15238e-08	Up	22.9468	43.618	53.8602	158.413	163.846	118.818	196	110106715	LOC110106715	uncharacterized LOC110106715
XR_002304302.2	116.609	17.4308	215.788	12.3797	3.6299	2.04413e-14	2.12335e-13	Up	2.33963	1.58932	1.81967	34.53	21.4168	30.8463	340	110106908	LOC110106908	uncharacterized LOC110106908, transcript variant X3
XR_002304308.2	69.3737	93.8653	44.8822	0.478155	-1.06445	0.0493506	0.126707	Down	15.9926	12.3691	17.2706	10.5474	8.5732	7.32353	232	110107012	LOC110107012	uncharacterized LOC110107012
XR_002304420.2	212.632	350.376	74.8881	0.213736	-2.2261	4.8064e-12	4.42602e-11	Down	15.1307	15.9044	13.8103	3.36048	3.93037	4.31008	883	110107965	LOC110107965	uncharacterized LOC110107965
XR_002304459.2	14.7354	0	29.4709	Inf	Inf	7.64062e-05	0.000372962	Up	0	0	0	0.37328	0.438317	0.486195	3104	110108387	LOC110108387	uncharacterized LOC110108387, transcript variant X1
XR_002304462.2	33.4023	0	66.8045	Inf	Inf	2.95124e-10	2.47476e-09	Up	1.32443e-33	7.9963e-29	7.3795e-33	9.79188	8.86351	6.44326	365	110108425	LOC110108425	uncharacterized LOC110108425
XR_002304478.2	81.2719	52.4569	110.087	2.09861	1.06944	0.0322545	0.0881055	Up	1.0741	1.37332	1.36759	2.99247	3.76999	2.90245	1561	110108299	LOC110108299	uncharacterized LOC110108299, transcript variant X2
XR_002304576.2	92.5027	129.332	55.6737	0.430472	-1.21601	0.00967923	0.0306833	Down	9.64695	9.40951	6.46505	1.99011	5.96779	5.4117	572	110109429	LOC110109429	uncharacterized LOC110109429
XR_002304604.2	21.6462	3.01846	40.2738	13.3425	3.73796	0.00122369	0.00477699	Up	0.834373	1.62062e-21	5.17713e-21	4.22248	3.59455	5.39907	416	110109657	LOC110109657	uncharacterized LOC110109657
XR_002304634.2	155.989	219.566	92.4125	0.420887	-1.2485	0.000537374	0.00224367	Down	10.5587	7.57112	7.23891	5.33721	3.42983	4.18818	979	110109862	LOC110109862	uncharacterized LOC110109862
XR_002304670.2	265.284	410.091	120.477	0.293781	-1.76719	4.46879e-10	3.66538e-09	Down	34.4564	35.8646	35.2219	12.6562	11.7614	13.2248	439	110110205	LOC110110205	uncharacterized LOC110110205
XR_002304714.2	31.0218	14.3878	47.6558	3.31225	1.72781	0.040972	0.108273	Up	1.47758	1.23421	0.764632	3.61463	4.62135	5.68301	469	110110467	LOC110110467	uncharacterized LOC110110467
XR_002304739.2	137.112	183.516	90.709	0.494285	-1.01658	0.0125876	0.0383562	Down	5.64659	6.94215	3.42013	2.82905	4.15826	2.6152	1295	110110631	LOC110110631	uncharacterized LOC110110631
XR_002304755.2	102.958	153.298	52.6187	0.343245	-1.54269	0.0168845	0.0494992	Down	6.51782	16.8363	9.86561	3.29988	6.39664	4.19785	521	110110790	LOC110110790	uncharacterized LOC110110790
XR_002304778.2	51.7449	25.3246	78.1652	3.08654	1.62599	0.013453	0.0406297	Up	4.47677	0.938953	1.07668	8.59132	6.90165	8.44071	446	110110926	LOC110110926	uncharacterized LOC110110926
XR_002304846.2	165.837	50.1861	281.488	5.60889	2.48772	1.88255e-11	1.67697e-10	Up	0.937041	1.26751	2.02937	9.40517	10.6471	9.06425	1326	110111263	LOC110111263	uncharacterized LOC110111263
XR_002304893.2	21.9827	43.9654	0	0	#NAME?	3.23499e-07	2.1066e-06	Down	2.34823	2.53796	1.96592	0	0	0	724	110111532	LOC110111532	uncharacterized LOC110111532
XR_002304990.2	116.774	70.1166	163.432	2.33086	1.22086	0.024209	0.0684325	Up	0.708368	1.04608	1.20049	1.66542	4.14841	2.54818	2687	110112103	LOC110112103	uncharacterized LOC110112103
XR_002304993.2	131.619	185.881	77.3572	0.416165	-1.26477	0.00142007	0.00543757	Down	15.3863	16.0356	13.9032	7.60907	8.39356	6.84974	464	110112135	LOC110112135	uncharacterized LOC110112135
XR_002305032.2	7.34333	14.6867	0	0	#NAME?	0.0087363	0.0280113	Down	0.185326	1.65912	1.60125	2.84519e-27	1.85106e-28	3.72503e-27	481	110112522	LOC110112522	uncharacterized LOC110112522
XR_002305047.2	196.487	337.41	55.5639	0.164678	-2.60228	2.2879e-14	2.36837e-13	Down	23.4485	23.9459	22.4557	3.16027	5.6957	5.13482	546	110112616	LOC110112616	uncharacterized LOC110112616
XR_002305078.2	21.6462	3.01846	40.2738	13.3425	3.73796	0.00122369	0.00477699	Up	0.834373	1.62062e-21	5.17713e-21	4.22248	3.59455	5.39907	416	110112753	LOC110112753	uncharacterized LOC110112753
XR_002305105.2	187.444	364.742	10.1461	0.027817	-5.16789	5.5467e-36	1.01532e-34	Down	38.4652	37.4209	43.5869	1.81366e-14	9.13057e-16	4.0839	345	110112985	LOC110112985	uncharacterized LOC110112985
XR_002305193.2	13.0645	1.01532	25.1136	24.7346	4.62846	0.00430721	0.0147774	Up	0.101587	3.86636e-09	0.0906227	2.27656	3.08544	0.535605	589	110113888	LOC110113888	uncharacterized LOC110113888, transcript variant X1
XR_002305209.2	13.7121	27.4242	0	0	#NAME?	0.000105816	0.000504221	Down	4.57716	6.29206	0.906084	0	0	0	264	110113967	LOC110113967	uncharacterized LOC110113967
XR_002305213.1	11.2921	0.679939	21.9043	32.2151	5.00967	0.00616832	0.0203935	Up	0.161891	0	0.165244	2.81535	2.3778	4.81669	301	110114045	LOC110114045	uncharacterized LOC110114045
XR_002305222.2	100.528	142.452	58.605	0.411403	-1.28138	0.00468032	0.015894	Down	10.3699	11.2887	9.37801	5.57789	4.14435	5.74097	519	110114209	LOC110114209	uncharacterized LOC110114209
XR_002305231.2	106.613	197.976	15.2499	0.0770289	-3.69846	7.9177e-14	7.89666e-13	Down	14.9759	17.0794	16.3406	1.62773	1.85007	1.15611	462	110114325	LOC110114325	uncharacterized LOC110114325
XR_002305284.2	21.6935	1.03366	42.3534	40.9741	5.35664	0.00155801	0.00594492	Up	0.00660354	9.79964e-17	0.101774	0.391264	3.26251	1.95782	1036	110115001	LOC110115001	uncharacterized LOC110115001, transcript variant X4
XR_002305288.2	434.839	600.057	269.62	0.449323	-1.15417	1.20017e-07	8.20707e-07	Down	34.4959	31.7039	29.9135	15.3951	19.3424	17.6652	706	110115039	LOC110115039	uncharacterized LOC110115039
XR_002305296.2	6.49245	0.37499	12.6099	33.6273	5.07156	0.0459957	0.119653	Up	9.03645e-15	0.0732334	1.65954e-21	2.43301	0.778996	2.49184	302	110115109	LOC110115109	uncharacterized LOC110115109
XR_002305298.2	791.816	1095.21	488.418	0.445957	-1.16502	1.32535e-12	1.24724e-11	Down	89.1452	97.5118	105.167	52.6969	51.0869	54.0667	424	110115119	LOC110115119	uncharacterized LOC110115119
XR_002305322.2	1025.36	1885.86	164.854	0.0874157	-3.51596	2.62937e-104	8.77041e-103	Down	319.004	302.654	317.305	32.1389	33.3272	34.0459	227	110115269	LOC110115269	uncharacterized LOC110115269
XR_002305427.2	67.1116	134.223	0	0	#NAME?	7.97403e-21	1.07345e-19	Down	11.7432	10.7826	10.4439	5.53153e-19	3.83537e-14	1.09187e-12	460	110116240	LOC110116240	uncharacterized LOC110116240
XR_002305428.2	1185.82	16.0134	2355.62	147.103	7.20068	1.02999e-147	4.61497e-146	Up	0.537712	0.483958	1.18931	145.668	120.194	124.538	826	110116259	LOC110116259	uncharacterized LOC110116259
XR_002305437.2	137.714	191.669	83.759	0.436999	-1.1943	0.00187181	0.00707706	Down	12.8893	12.3442	13.5638	7.19953	5.70109	7.58607	558	110116356	LOC110116356	uncharacterized LOC110116356
XR_003699444.1	204.3	131.836	276.764	2.09931	1.06991	0.000593513	0.00245755	Up	6.22339	13.705	13.9212	26.1381	34.3305	25.801	440	114578409	LOC114578409	uncharacterized LOC114578409
XR_003699448.1	118.436	160.093	76.7787	0.479588	-1.06013	0.0105971	0.0331037	Down	23.6494	27.2032	24.5538	13.9539	12.9882	16.9999	240	114578422	LOC114578422	uncharacterized LOC114578422
XR_003699476.1	96.4918	137.011	55.9722	0.408522	-1.29151	0.00577365	0.0191944	Down	17.3311	25.1276	15.9121	9.61262	10.3589	8.8384	265	114578454	LOC114578454	uncharacterized LOC114578454
XR_003699519.1	53.7985	0	107.597	Inf	Inf	3.85115e-16	4.2661e-15	Up	3.16351e-28	3.06005e-26	1.93696e-28	37.1575	38.2505	31.4941	138	114578510	LOC114578510	uncharacterized LOC114578510
XR_003699559.1	805.475	485.298	1125.65	2.3195	1.21382	1.07806e-13	1.0611e-12	Up	12.8462	13.2378	12.3267	34.3325	36.4102	37.1882	1429	114578557	LOC114578557	uncharacterized LOC114578557
XR_003699630.1	5.75889	0	11.5178	Inf	Inf	0.0303761	0.0833537	Up	0	0	0	0	1.38791	2.31317	436	114578638	LOC114578638	uncharacterized LOC114578638
XR_003699638.1	40.1694	0	80.3387	Inf	Inf	3.4931e-12	3.24652e-11	Up	0	0	0	12.8358	10.2409	17.7546	269	114578647	LOC114578647	uncharacterized LOC114578647
XR_003699639.1	26.4563	46.5621	6.3506	0.13639	-2.87419	0.0336712	0.0914497	Down	3.00989	1.1154	6.76015	0.133747	1.54749	0.048224	480	114578648	LOC114578648	uncharacterized LOC114578648
XR_003699668.1	213.163	355.797	70.5294	0.198229	-2.33476	5.36869e-13	5.08417e-12	Down	29.2019	31.5416	27.3108	6.20064	7.4175	7.48626	457	114578694	LOC114578694	uncharacterized LOC114578694
XR_003699683.1	352.938	233.536	472.341	2.02256	1.01618	2.56232e-05	0.000133312	Up	4.35779	4.13468	3.90387	9.81431	10.8111	9.78835	2129	114578714	LOC114578714	uncharacterized LOC114578714
XR_003699719.1	107.801	47.7223	167.88	3.51785	1.81469	5.31112e-05	0.000266177	Up	0.401911	0.279755	0.389881	1.50679	1.33588	1.7086	5057	114578760	LOC114578760	uncharacterized LOC114578760
XR_003699734.1	50.4634	82.2974	18.6295	0.226368	-2.14326	0.00117938	0.00463417	Down	6.3159	4.61533	5.80994	1.37115	1.96388	1.24923	556	114578781	LOC114578781	uncharacterized LOC114578781, transcript variant X2
XR_003699780.1	11.6318	23.2637	0	0	#NAME?	0.0414064	0.108991	Down	6.77306	0.105253	1.03321	1.32206e-20	6.65655e-08	0	334	110095875	LOC110095875	uncharacterized LOC110095875, transcript variant X2
XR_003699786.1	52.3321	13.4759	91.1884	6.7668	2.75847	4.09243e-05	0.000207668	Up	1.31039	1.46442	0.163336	6.06711	7.51982	10.7998	513	110109823	LOC110109823	uncharacterized LOC110109823
XR_003699802.1	36.5226	64.4777	8.56743	0.132874	-2.91187	0.0148985	0.0442824	Down	2.81377	3.08924	9.17698	0.335047	1.37299	0.710318	482	114578880	LOC114578880	uncharacterized LOC114578880
XR_003699864.1	13.0966	26.1931	0	0	#NAME?	0.000151942	0.000698515	Down	3.85963	2.6687	1.4447	0	0	0	372	114578975	LOC114578975	uncharacterized LOC114578975
XR_003699927.1	28.9139	49.6478	8.18002	0.164761	-2.60155	0.00380298	0.0133371	Down	2.13747	2.84725	1.10003	0.105454	0.0809895	1.03444	922	110104817	LOC110104817	uncharacterized LOC110104817, transcript variant X2
XR_003699942.1	7.63824	0	15.2765	Inf	Inf	0.00853361	0.027487	Up	0	0	0	1.39538	1.01323	0.976794	617	114579077	LOC114579077	uncharacterized LOC114579077
XR_003699976.1	13.7656	2.24994	25.2813	11.2364	3.49011	0.0133983	0.0405459	Up	1.41816e-29	0.455715	8.5664e-33	1.67812	1.46032	2.71898	590	114579117	LOC114579117	uncharacterized LOC114579117
XR_003699982.1	402.009	537.098	266.919	0.496966	-1.00878	6.55554e-06	3.71316e-05	Down	46.849	31.8979	42.4873	27.1694	22.051	23.6958	501	114579132	LOC114579132	uncharacterized LOC114579132
XR_003699993.1	14.9775	0.670769	29.2843	43.6578	5.44817	0.000748391	0.00304427	Up	0.113294	0	0	1.16658	3.4173	1.40853	676	110097251	LOC110097251	uncharacterized LOC110097251, transcript variant X1
XR_003699994.1	12.8559	0.670769	25.0411	37.3319	5.22234	0.00251362	0.00929297	Up	0.113222	0	0	1.04088	2.07898	1.14636	803	110097251	LOC110097251	uncharacterized LOC110097251, transcript variant X2
XR_003699996.1	9.17233	0	18.3447	Inf	Inf	0.0100329	0.0317039	Up	0	0	0	2.42916	0.00367478	1.21128	680	110097251	LOC110097251	uncharacterized LOC110097251, transcript variant X4
XR_003700024.1	23.3288	7.41201	39.2457	5.29487	2.4046	0.0165064	0.0485805	Up	0.0447389	0.0902092	0.113192	0.472057	0.760753	0.293608	3501	110115602	LOC110115602	uncharacterized LOC110115602, transcript variant X3
XR_003700104.1	5.22294	10.4459	0	0	#NAME?	0.036175	0.0970486	Down	0.234586	0.192159	0.473898	0.00057627	0.0122753	1.56496e-07	1297	110098039	LOC110098039	uncharacterized LOC110098039, transcript variant X1
XR_003700108.1	6.75656	13.5131	0	0	#NAME?	0.0123683	0.0377718	Down	0.613275	0.330809	0.693041	5.95078e-10	0.00221649	9.70984e-08	937	110098039	LOC110098039	uncharacterized LOC110098039, transcript variant X5
XR_003700116.1	82.4555	128.218	36.6933	0.28618	-1.80501	0.000386505	0.00165519	Down	1.04054	1.04808	1.34664	0.426487	0.410618	0.362727	4208	114579195	LOC114579195	uncharacterized LOC114579195
XR_003700146.1	5.63399	0	11.268	Inf	Inf	0.0322018	0.0880418	Up	0	0	0	0.208205	0.175336	0.113258	3195	114579241	LOC114579241	uncharacterized LOC114579241
XR_003700149.1	118.078	62.9149	173.242	2.75359	1.46131	0.00177021	0.00670133	Up	2.63006	1.51591	1.59355	4.33037	6.10939	8.69776	1242	114579243	LOC114579243	uncharacterized LOC114579243
XR_003700200.1	29.8867	8.42441	51.349	6.09527	2.60769	0.00360541	0.0127635	Up	0.102083	0.231147	0.536593	1.28844	2.60518	2.59527	1085	114579286	LOC114579286	uncharacterized LOC114579286
XR_003700216.1	81.207	32.9225	129.491	3.93322	1.97571	0.000162093	0.000740644	Up	0.987872	0.475861	0.513822	2.43751	3.08621	3.8946	1883	114579294	LOC114579294	uncharacterized LOC114579294, transcript variant X1
XR_003700291.1	177.535	96.8956	258.175	2.66446	1.41384	3.51203e-05	0.000179917	Up	0.476709	0.739994	0.894108	1.60915	2.69486	2.53586	5178	114579360	LOC114579360	uncharacterized LOC114579360, transcript variant X2
XR_003700338.1	8.97598	17.6349	0.317064	0.0179794	-5.79751	0.00874302	0.0280113	Down	0.0431918	0.904908	0.749888	1.12787e-07	9.38866e-28	0.0469196	1169	110095474	LOC110095474	uncharacterized LOC110095474, transcript variant X1
XR_003700387.1	67.8058	31.0592	104.552	3.36622	1.75113	0.00174387	0.00661833	Up	0.404212	0.515581	0.376959	1.84482	1.87785	1.57708	2707	110098221	LOC110098221	uncharacterized LOC110098221
XR_003700468.1	112.619	0	225.237	Inf	Inf	4.94184e-33	8.57538e-32	Up	0	0	0	6.54684	7.07921	6.30294	1547	114579468	LOC114579468	uncharacterized LOC114579468
XR_003700493.1	14.0802	27.8586	0.301808	0.0108336	-6.52835	0.00030477	0.00132789	Down	2.03654	0.591099	1.38586	1.91459e-23	0.0348047	3.23816e-19	785	110105235	LOC110105235	uncharacterized LOC110105235
XR_003700512.1	44.7014	0	89.4028	Inf	Inf	1.74812e-13	1.682e-12	Up	6.59496e-06	0.00232517	6.70085e-07	5.10202	5.25644	8.82092	639	110110236	LOC110110236	uncharacterized LOC110110236, transcript variant X1
XR_003700513.1	5.36728	0	10.7346	Inf	Inf	0.038721	0.103233	Up	4.20672e-06	0.00160095	4.32857e-07	0.494737	0.730372	0.679457	781	110110236	LOC110110236	uncharacterized LOC110110236, transcript variant X2
XR_003700514.1	40.3831	10.4792	70.287	6.70726	2.74572	0.000366807	0.00157533	Up	0.0797166	0.0635519	0.0812506	0.44499	0.896894	0.517891	5199	110110236	LOC110110236	uncharacterized LOC110110236, transcript variant X3
XR_003700548.1	3455.56	634.857	6276.27	9.88611	3.3054	1.21422e-261	8.89046e-260	Up	13.2392	12.1711	13.5996	158.713	150.695	158.074	1839	110103496	LOC110103496	uncharacterized LOC110103496, transcript variant X1
XR_003700549.1	112.262	30.4796	194.044	6.36637	2.67047	3.12397e-09	2.42958e-08	Up	0.300537	0.942571	0.489302	5.08689	3.49636	4.75998	1990	110103496	LOC110103496	uncharacterized LOC110103496, transcript variant X2
XR_003700574.1	72.9535	41.1358	104.771	2.54696	1.34878	0.0107908	0.0334994	Up	0.441124	0.748266	0.514393	1.78462	1.70802	1.77921	2725	114579546	LOC114579546	uncharacterized LOC114579546
XR_003700684.1	72.9916	25.4004	120.583	4.74727	2.2471	4.62768e-05	0.000233484	Up	0.188721	0.230109	0.157177	1.084	1.15841	1.04533	5041	114579614	LOC114579614	uncharacterized LOC114579614
XR_003700736.1	78.3615	13.7724	142.951	10.3795	3.37566	2.93327e-09	2.28719e-08	Up	0	1.03411	2.39618	12.5891	13.3169	17.7596	448	114579639	LOC114579639	uncharacterized LOC114579639
XR_003700784.1	20.9941	35.359	6.62929	0.187486	-2.41515	0.0260556	0.0728975	Down	0.0976177	0.330445	0.509478	0.0752288	0.138095	0.00411441	4256	110111831	LOC110111831	uncharacterized LOC110111831, transcript variant X2
XR_003700790.1	165.568	49.3862	281.75	5.70504	2.51224	0.000194531	0.000876849	Up	0.603554	0.476635	0.278797	3.30227	4.45224	1.66772	4104	110111831	LOC110111831	uncharacterized LOC110111831, transcript variant X8
XR_003700791.1	27.9887	53.5477	2.42972	0.0453748	-4.46197	1.81428e-05	9.60576e-05	Down	0.567925	0.591018	0.315919	0.000939146	0.071818	0.0156749	4109	110111831	LOC110111831	uncharacterized LOC110111831, transcript variant X9
XR_003700792.1	26.1279	3.16479	49.0911	15.5116	3.95528	0.000149299	0.000687417	Up	0.0447758	0.0581907	0.0488911	1.33315	1.42825	0.386109	2135	110111831	LOC110111831	uncharacterized LOC110111831, transcript variant X10
XR_003700794.1	459.962	264.216	655.707	2.4817	1.31133	1.17461e-09	9.35322e-09	Up	2.80614	2.18506	2.84775	8.07593	6.7375	8.75547	3809	110111831	LOC110111831	uncharacterized LOC110111831, transcript variant X12
XR_003700799.1	85.9914	51.106	120.877	2.36522	1.24197	0.0114874	0.0354056	Up	2.70573	2.20247	1.72764	6.48727	6.42182	5.99406	876	114579697	LOC114579697	uncharacterized LOC114579697
XR_003700844.1	203.536	94.6393	312.433	3.30131	1.72304	8.24259e-08	5.70144e-07	Up	3.82821	6.8058	7.85205	23.6295	28.7801	21.7641	578	114579708	LOC114579708	uncharacterized LOC114579708
XR_003700878.1	46.7855	69.6037	23.9673	0.344339	-1.5381	0.0223008	0.0638198	Down	2.59238	2.60936	1.93569	0.875195	0.898883	1.18679	1101	114579721	LOC114579721	uncharacterized LOC114579721
XR_003700896.1	66.2631	35.6631	96.863	2.71606	1.44151	0.00966943	0.0306833	Up	0.809636	1.08071	0.782301	3.08378	3.7667	1.94959	1510	114579728	LOC114579728	uncharacterized LOC114579728
XR_003700958.1	13.0271	0	26.0542	Inf	Inf	0.00023739	0.00105577	Up	0	0	0	0.707974	0.55072	0.67026	1856	114579779	LOC114579779	uncharacterized LOC114579779
XR_003700959.1	46.5122	8.84486	84.1796	9.51734	3.25056	9.80339e-06	5.39007e-05	Up	0.161027	0.216047	0.136118	2.07927	1.93479	1.91209	1943	114579780	LOC114579780	uncharacterized LOC114579780, transcript variant X1
XR_003700960.1	56.9317	14.6198	99.2436	6.78832	2.76305	1.9982e-05	0.000105424	Up	0.347499	0.218492	0.310382	2.3523	2.39597	2.40003	1903	114579780	LOC114579780	uncharacterized LOC114579780, transcript variant X2
XR_003700973.1	61.9753	92.6162	31.3343	0.338324	-1.56352	0.00870964	0.027964	Down	7.05376	8.88708	4.93922	3.31369	5.24521	0.0285219	502	114579789	LOC114579789	uncharacterized LOC114579789
XR_003700990.1	128.539	63.2564	193.821	3.06405	1.61544	8.42104e-05	0.000407085	Up	2.96211	1.1974	1.17632	5.72975	7.01889	7.05104	1341	114579807	LOC114579807	uncharacterized LOC114579807
XR_003700993.1	7.00181	14.0036	0	0	#NAME?	0.0106171	0.0331314	Down	1.23395	0.96461	0.511563	0	0	0	586	114579815	LOC114579815	uncharacterized LOC114579815
XR_003701070.1	12.2069	2.06108	22.3527	10.8451	3.43898	0.0258167	0.0724314	Up	0.195308	0.0519245	0.0479449	1.13105	1.32547	1.21493	837	114579846	LOC114579846	uncharacterized LOC114579846, transcript variant X1
XR_003701085.1	29.1132	2.45441	55.7719	22.7231	4.50609	1.24933e-05	6.78209e-05	Up	0.0692726	0.0762068	0.141472	2.90937	2.41872	2.85096	936	114579858	LOC114579858	uncharacterized LOC114579858
XR_003701114.1	52.8971	1.67692	104.117	62.0883	5.95625	4.14647e-12	3.84188e-11	Up	0.2095	2.44566e-33	1.29619e-33	6.1055	4.25618	6.73085	834	114579882	LOC114579882	uncharacterized LOC114579882
XR_003701119.1	26.3562	0	52.7124	Inf	Inf	0.00018407	0.000833451	Up	5.30411e-19	1.64159e-15	2.28024e-14	8.07034	19.5625	3.08691	236	114579887	LOC114579887	uncharacterized LOC114579887
XR_003701135.1	238.142	410.134	66.1487	0.161286	-2.63231	1.9136e-17	2.25279e-16	Down	19.361	17.6837	18.7796	3.06279	3.24499	4.59331	831	110116237	LOC110116237	uncharacterized LOC110116237
XR_003701163.1	56.1323	22.0772	90.1874	4.08509	2.03037	0.0011953	0.00469057	Up	0.856477	0.738259	0.559305	3.87618	3.67359	3.19653	1149	114579911	LOC114579911	uncharacterized LOC114579911
XR_003701247.1	58.5062	26.5479	90.4646	3.4076	1.76876	0.00409262	0.0141597	Up	0.521349	0.194035	0.774799	2.17062	1.76659	2.21727	2012	114579956	LOC114579956	uncharacterized LOC114579956
XR_003701266.1	27.4104	1.84452	52.9762	28.7209	4.84403	8.29077e-06	4.65213e-05	Up	8.89677e-07	0.0506368	0.015016	0.471702	0.804354	0.991302	3203	110101757	LOC110101757	uncharacterized LOC110101757, transcript variant X1
XR_003701267.1	39.3919	0	78.7838	Inf	Inf	3.15539e-10	2.63858e-09	Up	8.90404e-07	7.893e-07	0.00558551	0.964877	0.694649	1.70221	3200	110101757	LOC110101757	uncharacterized LOC110101757, transcript variant X2
XR_003701268.1	248.708	2.56406	494.852	192.996	7.59242	6.35236e-63	1.64395e-61	Up	1.05511e-06	0.0687114	0.0222014	6.74135	7.75951	8.74399	2916	110101757	LOC110101757	uncharacterized LOC110101757, transcript variant X3
XR_003701269.1	192.433	1.84452	383.021	207.654	7.69804	1.63671e-49	3.63956e-48	Up	9.45715e-07	0.0565775	0.0170843	5.2457	5.87456	6.57994	2966	110101757	LOC110101757	uncharacterized LOC110101757, transcript variant X4
XR_003701273.1	106.289	148.966	63.6124	0.427026	-1.2276	0.00509014	0.0171499	Down	9.38786	8.51363	11.6805	5.16478	5.54451	4.68506	569	114579984	LOC114579984	uncharacterized LOC114579984
XR_003701320.1	64.3761	32.3403	96.4118	2.98117	1.57588	0.0069676	0.02281	Up	0.911623	0.278441	0.397951	1.83822	2.03275	1.80744	2318	114580014	LOC114580014	uncharacterized LOC114580014, transcript variant X1
XR_003701328.1	143.626	94.5107	192.741	2.03936	1.02812	0.00617786	0.0204026	Up	0.324317	0.341846	0.311757	0.753817	0.913118	0.745152	10968	114580025	LOC114580025	uncharacterized LOC114580025
XR_003701361.1	22.4929	38.6199	6.36585	0.164833	-2.60092	0.013273	0.0402076	Down	3.5004	7.53478	2.9172	0.221548	2.25009	0.307029	312	114580097	LOC114580097	uncharacterized LOC114580097, transcript variant X1
XR_003701362.1	198.166	319.985	76.3471	0.238596	-2.06736	5.12946e-10	4.17308e-09	Down	56.9458	66.4929	57.408	19.7042	18.0823	14.5613	200	114580097	LOC114580097	uncharacterized LOC114580097, transcript variant X2
XR_003701367.1	414.763	662.437	167.089	0.252234	-1.98716	5.32407e-18	6.41882e-17	Down	27.0427	30.2624	32.7552	9.31224	8.47251	9.76193	831	110103025	LOC110103025	uncharacterized LOC110103025
XR_003701375.1	19.6951	0	39.3902	Inf	Inf	2.83713e-06	1.68322e-05	Up	5.50465e-18	0.00157236	2.98788e-09	1.09522	1.10102	1.60933	1424	110096458	LOC110096458	uncharacterized LOC110096458, transcript variant X3
XR_003701379.1	25.3482	50.0788	0.617563	0.0123318	-6.34147	8.21942e-07	5.09808e-06	Down	0.787384	1.18097	1.23002	0.0224119	2.22189e-08	0.0157725	1774	114578340	LOC114578340	uncharacterized LOC114578340, transcript variant X1
XR_003701381.1	116.547	200.855	32.239	0.160509	-2.63927	2.61066e-09	2.04587e-08	Down	3.89026	4.07851	4.02728	0.757945	0.695314	0.883055	1893	114578340	LOC114578340	uncharacterized LOC114578340, transcript variant X3
XR_003701388.1	81.2556	47.4847	115.027	2.42239	1.27643	0.0126086	0.0383562	Up	2.12236	1.10245	1.85949	4.2965	6.07109	4.53702	1058	114580112	LOC114580112	uncharacterized LOC114580112, transcript variant X1
XR_003701390.1	224.236	138.068	310.404	2.24819	1.16877	0.000120977	0.000566571	Up	0.828053	0.65804	0.675388	1.9418	2.0595	1.90036	7204	114580113	LOC114580113	uncharacterized LOC114580113
XR_003701391.1	736.048	360.297	1111.8	3.08579	1.62564	4.62246e-21	6.27902e-20	Up	2.97846	2.89639	2.26146	10.8672	9.32278	10.2178	5007	114580114	LOC114580114	uncharacterized LOC114580114
XR_003701392.1	118.436	60.9847	175.887	2.88412	1.52813	0.000316316	0.00137223	Up	0.469467	0.305604	0.278749	1.34574	0.92426	1.40155	6551	114580115	LOC114580115	uncharacterized LOC114580115
XR_003701394.1	761.912	359.332	1164.49	3.24072	1.69631	1.45376e-23	2.10831e-22	Up	2.13617	3.17596	3.03277	11.828	10.0987	10.8609	4863	114580117	LOC114580117	uncharacterized LOC114580117
XR_003701426.1	8023.23	13542.2	2504.28	0.184924	-2.43499	4.24932e-280	3.27089e-278	Down	142.675	140.883	143.128	32.7183	31.0716	31.85	3587	114580135	LOC114580135	uncharacterized LOC114580135
XR_003701481.1	63.5425	90.4439	36.641	0.405124	-1.30357	0.0235362	0.0667824	Down	3.27634	4.37466	5.06697	2.45828	2.0478	1.74623	804	110107859	LOC110107859	uncharacterized LOC110107859
XR_003701485.1	150.025	220.485	79.5654	0.360865	-1.47047	8.18089e-05	0.000396754	Down	10.549	11.0319	13.9584	7.4083	4.1859	3.92403	702	114580171	LOC114580171	uncharacterized LOC114580171
XR_003701488.1	47.8136	9.16229	86.4649	9.43703	3.23833	8.09553e-06	4.55962e-05	Up	0.047647	0.305489	0.725795	3.02825	4.99993	4.26027	964	110111521	LOC110111521	uncharacterized LOC110111521, transcript variant X3
XR_003701496.1	615.941	197.39	1034.49	5.24085	2.3898	5.60151e-05	0.000279331	Up	1.89536e-06	60.1485	36.2571	277.814	203.117	131.864	231	114580176	LOC114580176	uncharacterized LOC114580176
XR_003701536.1	32.2272	54.4608	9.99349	0.183499	-2.44616	0.00334745	0.0119065	Down	5.97847	3.33924	6.057	0	1.0921	2.33482	400	114580208	LOC114580208	uncharacterized LOC114580208
XR_003701538.1	36.9032	18.1108	55.6956	3.07528	1.62072	0.0355691	0.0956884	Up	0.872292	0.592267	0.667675	2.8184	2.55006	2.50969	961	110107415	LOC110107415	uncharacterized LOC110107415
XR_003701602.1	97.2812	42.2857	152.277	3.60114	1.84845	8.72485e-05	0.000419744	Up	1.07952	0.846916	0.879694	4.33592	4.27674	3.70717	1694	114580255	LOC114580255	uncharacterized LOC114580255
XR_003701627.1	126.666	62.497	190.835	3.0535	1.61046	7.69804e-05	0.000374546	Up	1.35684	1.38107	1.31578	5.09364	5.35305	4.56005	1743	114580268	LOC114580268	uncharacterized LOC114580268
XR_003701652.1	62.4851	113.166	11.8043	0.10431	-3.26105	6.48146e-07	4.08768e-06	Down	4.05367	4.81456	7.9729	0.000971139	0.910055	1.28236	758	114580292	LOC114580292	uncharacterized LOC114580292
XR_003701688.1	5.48941	0	10.9788	Inf	Inf	0.0354979	0.0956884	Up	0	0	0	2.10846	1.12098	1.15711	348	114580327	LOC114580327	uncharacterized LOC114580327
XR_003701742.1	99.7525	155.448	44.0573	0.283422	-1.81898	8.01252e-05	0.000389217	Down	7.39205	10.0125	12.5906	2.50495	3.22293	4.60509	585	110099512	LOC110099512	uncharacterized LOC110099512, transcript variant X2
XR_003701755.1	184.424	254.05	114.798	0.451871	-1.14602	0.000616959	0.00254062	Down	18.5046	26.4427	17.6299	9.60164	10.0363	14.6448	459	114580377	LOC114580377	uncharacterized LOC114580377
XR_003701784.1	14.4378	0.344554	28.531	82.8055	6.37165	0.00039618	0.00169179	Up	0	0	0.0642323	2.06239	2.01772	2.31962	608	114580403	LOC114580403	uncharacterized LOC114580403
XR_003701829.1	13.2209	2.10069	24.341	11.5872	3.53446	0.0168199	0.0493582	Up	0.0206781	0.0200741	0.0116729	0.0315967	0.38155	0.312054	4610	110107057	LOC110107057	uncharacterized LOC110107057, transcript variant X2
XR_003701838.1	38.7266	75.0135	2.43974	0.032524	-4.94235	5.40102e-08	3.77066e-07	Down	3.12508	3.35406	4.48659	0.198479	0.100902	0.103915	772	114580435	LOC114580435	uncharacterized LOC114580435
XR_003701851.1	32.8736	2.54572	63.2014	24.8265	4.63381	1.81208e-06	1.09454e-05	Up	0.0622813	0.209663	0.00522774	3.7634	1.88179	3.42956	949	110105077	LOC110105077	uncharacterized LOC110105077, transcript variant X5
XR_003701885.1	116.658	53.3296	179.986	3.37497	1.75487	4.20664e-05	0.000212957	Up	4.29295	5.77156	9.25872	25.9517	22.1176	30.8469	312	110093429	LOC110093429	uncharacterized LOC110093429
XR_003701896.1	123.06	1.05493	245.065	232.304	7.85987	2.16965e-32	3.74327e-31	Up	0.0978873	0.112007	0.0998658	21.7529	17.5315	20.2487	563	114580477	LOC114580477	uncharacterized LOC114580477
XR_003701912.1	461.635	262.64	660.629	2.51534	1.33075	4.49361e-10	3.6757e-09	Up	4.44201	4.75084	3.9696	13.9271	11.9851	14.1791	2256	114580483	LOC114580483	uncharacterized LOC114580483
XR_003701913.1	7.06748	13.5008	0.634128	0.0469696	-4.41213	0.0494024	0.126707	Down	0.0670669	0.556434	0.764626	1.84489e-09	0.0101664	0.0846438	1089	110098446	LOC110098446	uncharacterized LOC110098446
XR_003701924.1	176.352	259.281	93.4225	0.360314	-1.47267	1.55803e-05	8.32241e-05	Down	17.3068	12.4127	17.6041	7.77184	5.88052	6.9753	619	110094286	LOC110094286	uncharacterized LOC110094286
XR_003701938.1	781.058	229.676	1332.44	5.80139	2.5364	3.84421e-47	8.36256e-46	Up	18.0214	10.9743	18.6224	102.405	114.841	117.814	545	114580502	LOC114580502	uncharacterized LOC114580502
XR_003701958.1	12.5139	0.335385	24.6925	73.6244	6.20211	0.00130042	0.00503074	Up	0.0227907	6.26031e-09	5.61458e-09	0.643596	0.0919995	0.745856	2280	110102784	LOC110102784	uncharacterized LOC110102784, transcript variant X3
XR_003702057.1	167.607	96.9169	238.297	2.45878	1.29794	0.000233386	0.0010395	Up	1.85818	1.64325	1.93447	4.80651	5.6012	5.80047	2015	114580595	LOC114580595	uncharacterized LOC114580595
XR_003702077.1	17.2024	5.65881	28.746	5.07988	2.34479	0.0471535	0.122318	Up	0.209705	0.341678	0.313831	2.12764	1.5017	1.63722	744	114580610	LOC114580610	uncharacterized LOC114580610
XR_003702149.1	79.0952	4.51842	153.672	34.0101	5.08789	3.04815e-15	3.26805e-14	Up	0.0861408	0.0475851	0.0032241	1.57963	2.06247	1.70905	3944	110093674	LOC110093674	uncharacterized LOC110093674, transcript variant X2
XR_003702193.1	173.618	345.681	1.55481	0.00449781	-7.79656	1.28862e-46	2.78304e-45	Down	18.7913	18.0697	21.8545	0	0.0972825	0.198189	665	114580672	LOC114580672	uncharacterized LOC114580672
XR_003702194.1	301.542	410.893	192.191	0.467739	-1.09622	3.01046e-05	0.000155016	Down	39.151	50.7475	37.4593	22.2936	24.7986	25.074	365	114580673	LOC114580673	uncharacterized LOC114580673
XR_003702199.1	36.9683	58.2985	15.638	0.26824	-1.8984	0.0137619	0.041396	Down	0.260391	0.261678	0.234004	0.102774	0.053068	0.0905148	8689	110095756	LOC110095756	uncharacterized LOC110095756, transcript variant X1
XR_003702200.1	53.8698	86.5561	21.1834	0.244736	-2.0307	0.00140993	0.00540564	Down	0.415315	0.376939	0.347875	0.138993	0.0661966	0.13122	8590	110095756	LOC110095756	uncharacterized LOC110095756, transcript variant X2
XR_003702203.1	10.219	0.335385	20.1026	59.939	5.90542	0.00519795	0.0174936	Up	0.057058	0	0	0.583913	0.771966	1.51234	961	114580678	LOC114580678	uncharacterized LOC114580678
XR_003702205.1	47.5921	95.1842	0	0	#NAME?	6.38271e-15	6.7468e-14	Down	4.97069	6.13687	4.97123	1.65281e-31	2.24014e-19	0	668	114580679	LOC114580679	uncharacterized LOC114580679
XR_003702206.1	130.057	82.214	177.899	2.16386	1.1136	0.00453527	0.0154714	Up	1.02211	1.83506	1.50884	3.5725	3.69413	4.11362	2140	114580684	LOC114580684	uncharacterized LOC114580684
XR_003702231.1	6.59282	0	13.1856	Inf	Inf	0.0171797	0.0502667	Up	0	0	0	1.03111	0.824108	1.06553	623	114580698	LOC114580698	uncharacterized LOC114580698, transcript variant X1
XR_003702238.1	31.6948	5.25631	58.1332	11.0597	3.46724	0.000147058	0.000678138	Up	0.681155	0.564354	0.351183	6.74289	8.21272	6.74624	368	110112513	LOC110112513	uncharacterized LOC110112513
XR_003702242.1	17.4139	3.86307	30.9646	8.01556	3.0028	0.0140277	0.0420225	Up	0.0133216	0.0299342	0.0545544	0.253525	0.360145	0.323777	4576	110100399	LOC110100399	uncharacterized LOC110100399
XR_003702265.1	271.296	534.155	8.43621	0.0157936	-5.98452	3.16252e-15	3.3786e-14	Down	32.3181	18.2131	38.8757	0.654307	1.02595	3.9787e-17	675	114580713	LOC114580713	uncharacterized LOC114580713
XR_003702269.1	41.0645	8.59786	73.5311	8.55226	3.09631	0.00378903	0.0133165	Up	0.0348827	0.102687	0.0608939	0.383865	1.22276	0.502697	4808	110099253	LOC110099253	uncharacterized LOC110099253, transcript variant X1
XR_003702280.1	40.9898	70.299	11.6805	0.166155	-2.5894	0.000582413	0.00242161	Down	6.46089	6.85542	5.77308	1.26418	0.973701	1.55485	417	114580722	LOC114580722	uncharacterized LOC114580722
XR_003702294.1	15.8941	4.69538	27.0927	5.77008	2.52859	0.0476095	0.122998	Up	1.05559	6.56625e-21	4.68913e-27	1.70606	4.24913	1.42682	502	114580741	LOC114580741	uncharacterized LOC114580741
XR_003702332.1	215.969	113.697	318.24	2.79901	1.48492	1.78181e-06	1.07842e-05	Up	1.70824	1.58757	1.24011	5.69687	5.09892	4.59329	2831	114580771	LOC114580771	uncharacterized LOC114580771
XR_003702334.1	27.3992	45.0874	9.71101	0.215382	-2.21503	0.016168	0.0477251	Down	2.5768	3.07402	2.53747	0.422291	1.44422	0.300629	626	110104885	LOC110104885	uncharacterized LOC110104885
XR_003702345.1	118.882	41.8715	195.892	4.6784	2.22601	2.68323e-07	1.77034e-06	Up	0.790895	0.66045	1.08137	4.89349	5.76154	3.68429	1875	110106075	LOC110106075	uncharacterized LOC110106075
XR_003702351.1	5.81106	0	11.6221	Inf	Inf	0.0287689	0.0791606	Up	4.93709e-15	3.48351e-05	0.0172387	0.413796	0.60406	0.459986	1084	114580788	LOC114580788	uncharacterized LOC114580788
XR_003702379.1	21550.5	5691.76	37409.2	6.57251	2.71644	0	0	Up	154.062	156.269	158.532	1228.27	1248.94	1258.71	1372	114580801	LOC114580801	uncharacterized LOC114580801
XR_003702383.1	21.2017	6.6316	35.7718	5.39414	2.43139	0.0225849	0.0644485	Up	0.0542588	0.0606319	0.170041	0.552396	0.859554	0.588566	2466	114580804	LOC114580804	uncharacterized LOC114580804
XR_003702413.1	228.685	330.518	126.853	0.383799	-1.38158	4.05909e-06	2.37996e-05	Down	1.94242	1.69356	2.02055	0.875664	0.855547	0.896625	6606	110095039	LOC110095039	uncharacterized LOC110095039, transcript variant X1
XR_003702439.1	31.6538	13.574	49.7336	3.66389	1.87338	0.0266095	0.0742395	Up	0.0948698	0.0670063	0.0961585	0.388522	0.311223	0.433864	6011	110096877	LOC110096877	uncharacterized LOC110096877
XR_003702440.1	115.775	28.0291	203.52	7.26104	2.86018	1.50814e-05	8.07027e-05	Up	1.14362	0.507591	0.734391	9.66451	4.23915	6.88305	1338	114580844	LOC114580844	uncharacterized LOC114580844
XR_003702492.1	21.1617	35.5872	6.73609	0.189284	-2.40138	0.0235606	0.0667883	Down	0.140163	0.199888	0.214295	0.044813	0.0381963	0.040078	7266	110101087	LOC110101087	uncharacterized LOC110101087, transcript variant X4
XR_003702493.1	31.2668	53.6582	8.87533	0.165405	-2.59593	0.00288559	0.0104272	Down	0.208845	0.321912	0.320216	0.0644014	0.0516956	0.0560073	7160	110101087	LOC110101087	uncharacterized LOC110101087, transcript variant X5
XR_003702494.1	38.5638	58.8603	18.2674	0.310351	-1.68803	0.0373473	0.0996593	Down	0.505014	0.155615	0.254629	0.116711	0.0328266	0.191968	7256	110101087	LOC110101087	uncharacterized LOC110101087, transcript variant X6
XR_003702530.1	62.4153	31.2581	93.5726	2.99355	1.58186	0.0350428	0.0947735	Up	0.555362	0.337573	0.551391	2.73271	0.820601	1.67815	2442	110100928	LOC110100928	uncharacterized LOC110100928, transcript variant X1
XR_003702576.1	28.5797	12.3359	44.8236	3.6336	1.8614	0.0350902	0.0948163	Up	0.418192	0.45979	0.279735	1.65056	1.46868	1.93099	1221	114580902	LOC114580902	uncharacterized LOC114580902
XR_003702577.1	45.4918	83.7327	7.25078	0.0865944	-3.52958	3.20448e-06	1.88995e-05	Down	3.55509	4.10904	3.80165	0.285701	0.884761	0.0761933	826	110098337	LOC110098337	uncharacterized LOC110098337
XR_003702584.1	24.9567	1.40865	48.5048	34.4334	5.10574	1.39731e-05	7.55806e-05	Up	0.00874884	0.0301983	0.0555761	0.729277	1.78534	0.801218	2010	110113912	LOC110113912	uncharacterized LOC110113912, transcript variant X1
XR_003702596.1	12.095	22.9523	1.23774	0.0539268	-4.21285	0.00894085	0.028584	Down	1.27666	1.84614	1.54377	0	0.182448	0.183934	560	114580921	LOC114580921	uncharacterized LOC114580921
XR_003702762.1	328.938	532.193	125.683	0.23616	-2.08216	9.93196e-16	1.07638e-14	Down	19.6693	22.1091	19.6519	7.8953	5.03694	4.59319	979	114580968	LOC114580968	uncharacterized LOC114580968
XR_003702767.1	10.0576	18.2904	1.82479	0.0997675	-3.32529	0.0490064	0.125957	Down	0.0883792	0.090342	0.0697642	0.00729862	0.022024	0.00769705	8288	114580972	LOC114580972	uncharacterized LOC114580972, transcript variant X2
XR_003702819.1	26.9309	2.48485	51.377	20.6761	4.36989	3.75576e-05	0.000191748	Up	0.0218952	0.036127	0.0224498	0.937238	0.447654	0.638236	3457	114581017	LOC114581017	uncharacterized LOC114581017, transcript variant X1
XR_003702820.1	30.1799	2.48485	57.8749	23.2911	4.54171	7.42845e-06	4.19177e-05	Up	0.0218493	0.036016	0.0224063	0.496181	0.826269	0.98443	3460	114581017	LOC114581017	uncharacterized LOC114581017, transcript variant X2
XR_003702837.1	21.6628	5.71988	37.6057	6.57457	2.7169	0.0124951	0.0381202	Up	0.274434	3.12606e-05	0.0334962	0.530319	1.2682	0.71831	2035	110115441	LOC110115441	uncharacterized LOC110115441, transcript variant X3
XR_003702839.1	7.04327	14.0865	0	0	#NAME?	0.0224688	0.0642393	Down	7.00338e-10	0.245933	0.642265	1.29563e-06	8.75254e-18	4.16465e-10	1791	110115441	LOC110115441	uncharacterized LOC110115441, transcript variant X5
XR_003702913.1	76.4428	48.3781	104.507	2.16022	1.11118	0.033692	0.0914497	Up	0.905869	0.613241	1.05508	1.90617	2.95231	1.89411	2122	114581100	LOC114581100	uncharacterized LOC114581100
XR_003702943.1	163.639	26.8126	300.465	11.2061	3.48621	1.61044e-18	1.96526e-17	Up	1.59198	1.08079	1.6539	19.7853	17.9342	20.7776	703	114578370	LOC114578370	uncharacterized LOC114578370
XR_003702959.1	14.1407	2.10986	26.1715	12.4044	3.63278	0.0111359	0.0344994	Up	0.194021	0.218774	0.19121	2.34598	2.42129	3.63482	424	114581131	LOC114581131	uncharacterized LOC114581131
XR_003703026.1	50.6906	83.904	17.4772	0.2083	-2.26327	0.000591787	0.00245379	Down	7.7882	3.88449	4.6511	0.853537	1.88471	1.4116	583	110103167	LOC110103167	uncharacterized LOC110103167
XR_003703049.1	17.4373	5.64047	29.2342	5.18293	2.37377	0.043126	0.112971	Up	0.411823	0.458561	0.280976	2.47892	3.09543	1.55064	563	114581184	LOC114581184	uncharacterized LOC114581184
XR_003703113.1	33.3033	3.13728	63.4694	20.2307	4.33848	4.75535e-06	2.76123e-05	Up	0.396016	0.21584	0	6.67112	5.23653	4.25618	539	114581219	LOC114581219	uncharacterized LOC114581219
XR_003703116.1	46.6013	92.8855	0.317064	0.0034135	-8.19453	1.42319e-13	1.39167e-12	Down	2.72435	3.0713	2.65364	5.15106e-05	1.60819e-05	0.0208015	1241	114581227	LOC114581227	uncharacterized LOC114581227, transcript variant X1
XR_003703143.1	8.41368	16.8274	0	0	#NAME?	0.00382302	0.0133917	Down	1.18336	0.29728	0.781135	0	0	0	836	114581260	LOC114581260	uncharacterized LOC114581260
XR_003703154.1	15.3198	0.689109	29.9505	43.4627	5.4417	0.000637362	0.00261746	Up	0	0	0.189289	4.18634	2.41304	6.55803	310	114581294	LOC114581294	uncharacterized LOC114581294, transcript variant X1
XR_003703248.1	32.6246	65.2491	0	0	#NAME?	2.04283e-10	1.73727e-09	Down	2.36077	2.47127	1.05637	0	0	0	1258	110106795	LOC110106795	uncharacterized LOC110106795, transcript variant X2
XR_003703260.1	80.4199	132.348	28.4918	0.215279	-2.21572	2.35686e-05	0.000123263	Down	2.06926	2.10216	2.00962	0.440217	0.637713	0.538216	2416	110096185	LOC110096185	uncharacterized LOC110096185, transcript variant X1
XR_003703311.1	97.9525	160.226	35.6786	0.222676	-2.16698	5.60644e-06	3.22424e-05	Down	19.1666	18.3946	12.4603	6.17334	6.28675	1.12412	362	114581375	LOC114581375	uncharacterized LOC114581375
XR_003703321.1	48.8995	80.55	17.2491	0.214141	-2.22337	0.000916794	0.00367452	Down	5.24435	3.66162	3.90695	0.828867	1.06111	1.4779	710	114581386	LOC114581386	uncharacterized LOC114581386
XR_003703327.1	73.0769	33.227	112.927	3.39864	1.76496	0.00107101	0.0042194	Up	0.377294	0.536772	0.414317	1.83593	1.57614	2.03329	2841	114581400	LOC114581400	uncharacterized LOC114581400
