# Supplementary material for: Whole-Transcriptome Sequencing Reveals the Global Molecular Responses and NAC Transcription Factors Involved in Drought Stress in Dendrobium catenatum
Source: Antioxidants (Basel). 2024 Jan 12;13(1):94. doi: 10.3390/antiox13010094 (PMC10812421; doi:10.3390/antiox13010094)
Supplement: Supplementary file 1 [file antioxidants-13-00094-s001.zip › Table S5-circRNA list.xlsx]

## Sheet: annotation_circRNA
id	circRNA_chr	circRNA_strand	circRNA_start	circRNA_end	genomic_length	circRNA_length	Type	best-transcript	transcript_position	length	gene_id	gene	gene_product	GO_id	GO_term	pathway	pathway_description
circRNA_0001|NW_021318462.1:213787_214073_-	NW_021318462.1	-	213787	214073	287	187	sense-overlapping	XM_020819918.2	NW_021318462.1:181621_215525_-	1472	110094649	LOC110094649	putative GPI-anchor transamidase	GO:0005783,GO:0005789,GO:0042765,GO:0030176,GO:0008234,GO:0003923,GO:0016255,GO:0034394	endoplasmic reticulum|endoplasmic reticulum membrane|GPI-anchor transamidase complex|integral component of endoplasmic reticulum membrane|cysteine-type peptidase activity|GPI-anchor transamidase activity|attachment of GPI anchor to protein|protein localization to cell surface	path:dct00563,path:dct01100	Glycosylphosphatidylinositol (GPI)-anchor biosynthesis|Metabolic pathways
circRNA_0002|NW_021318462.1:308393_308667_-	NW_021318462.1	-	308393	308667	275	195	sense-overlapping	XM_028700241.1	NW_021318462.1:306738_329481_-	1477	110094648	LOC110094648	deoxynucleoside triphosphate triphosphohydrolase SAMHD1 homolog, transcript variant X9	-	-	-	-
circRNA_0003|NW_021318462.1:318383_320618_-	NW_021318462.1	-	318383	320618	2236	386	sense-overlapping	XM_028700241.1	NW_021318462.1:306738_329481_-	1477	110094648	LOC110094648	deoxynucleoside triphosphate triphosphohydrolase SAMHD1 homolog, transcript variant X9	-	-	-	-
circRNA_0004|NW_021318462.1:1272119_1272509_-	NW_021318462.1	-	1272119	1272509	391	257	sense-overlapping	XM_020819053.2	NW_021318462.1:1268139_1287078_-	2021	110093976	LOC110093976	importin subunit alpha	GO:0005829,GO:0005643,GO:0005654,GO:0061608,GO:0008139,GO:0006607	cytosol|nuclear pore|nucleoplasm|nuclear import signal receptor activity|nuclear localization sequence binding|NLS-bearing protein import into nucleus	-	-
circRNA_0005|NW_021318464.1:329024_341252_-	NW_021318464.1	-	329024	341252	12229	538	sense-overlapping	XM_020818510.2	NW_021318464.1:303332_433468_-	4063	110093579	LOC110093579	phosphoglucan, water dikinase, chloroplastic, transcript variant X1	GO:0009570,GO:0102217,GO:0005524,GO:0019200,GO:0046872,GO:0102219,GO:2001070,GO:0046777,GO:0005982	chloroplast stroma|6-phosphoglucan, water dikinase activity|ATP binding|carbohydrate kinase activity|metal ion binding|phosphogluco-amylopectin water dikinase activity|starch binding|protein autophosphorylation|starch metabolic process	-	-
circRNA_0006|NW_021318464.1:417506_417822_-	NW_021318464.1	-	417506	417822	317	221	sense-overlapping	XM_020818510.2	NW_021318464.1:303332_433468_-	4063	110093579	LOC110093579	phosphoglucan, water dikinase, chloroplastic, transcript variant X1	GO:0009570,GO:0102217,GO:0005524,GO:0019200,GO:0046872,GO:0102219,GO:2001070,GO:0046777,GO:0005982	chloroplast stroma|6-phosphoglucan, water dikinase activity|ATP binding|carbohydrate kinase activity|metal ion binding|phosphogluco-amylopectin water dikinase activity|starch binding|protein autophosphorylation|starch metabolic process	-	-
circRNA_0007|NW_021318464.1:417506_425774_-	NW_021318464.1	-	417506	425774	8269	306	sense-overlapping	XM_020818510.2	NW_021318464.1:303332_433468_-	4063	110093579	LOC110093579	phosphoglucan, water dikinase, chloroplastic, transcript variant X1	GO:0009570,GO:0102217,GO:0005524,GO:0019200,GO:0046872,GO:0102219,GO:2001070,GO:0046777,GO:0005982	chloroplast stroma|6-phosphoglucan, water dikinase activity|ATP binding|carbohydrate kinase activity|metal ion binding|phosphogluco-amylopectin water dikinase activity|starch binding|protein autophosphorylation|starch metabolic process	-	-
circRNA_0008|NW_021318465.1:52841_53349_+	NW_021318465.1	+	52841	53349	509	350	sense-overlapping	XM_020848373.2	NW_021318465.1:34632_118168_+	1994	110115201	LOC110115201	lycopene epsilon cyclase, chloroplastic, transcript variant X1	GO:0031969,GO:0016021,GO:0016853,GO:0016705,GO:0016117	chloroplast membrane|integral component of membrane|isomerase activity|oxidoreductase activity, acting on paired donors, with incorporation or reduction of molecular oxygen|carotenoid biosynthetic process	path:dct00906,path:dct01100,path:dct01110	Carotenoid biosynthesis|Metabolic pathways|Biosynthesis of secondary metabolites
circRNA_0009|NW_021318465.1:395601_395888_+	NW_021318465.1	+	395601	395888	288	159	sense-overlapping	XM_020818347.2	NW_021318465.1:347874_398000_+	3741	110093452	LOC110093452	importin-5, transcript variant X1	GO:0005737,GO:0005829,GO:0005635,GO:0031965,GO:0034399,GO:0005643,GO:0005634,GO:0005525,GO:0061608,GO:0008139,GO:0006606,GO:0010389	cytoplasm|cytosol|nuclear envelope|nuclear membrane|nuclear periphery|nuclear pore|nucleus|GTP binding|nuclear import signal receptor activity|nuclear localization sequence binding|protein import into nucleus|regulation of G2/M transition of mitotic cell cycle	-	-
circRNA_0010|NW_021318465.1:544212_551632_+	NW_021318465.1	+	544212	551632	7421	3936	sense-overlapping	XM_020818345.2	NW_021318465.1:546473_552266_+	2077	110093449	LOC110093449	O-fucosyltransferase 36	-	-	path:dct00514	Other types of O-glycan biosynthesis
circRNA_0011|NW_021318465.1:599200_599446_+	NW_021318465.1	+	599200	599446	247	247	exonic	XM_020818355.2	NW_021318465.1:593722_608743_+	1118	110093458	LOC110093458	fatty-acid-binding protein 1	GO:0009507,GO:0009941,GO:0009570,GO:0005829,GO:0005739,GO:0009536,GO:0005504,GO:0016872,GO:0006631	chloroplast|chloroplast envelope|chloroplast stroma|cytosol|mitochondrion|plastid|fatty acid binding|intramolecular lyase activity|fatty acid metabolic process	-	-
circRNA_0012|NW_021318465.1:658332_675127_+	NW_021318465.1	+	658332	675127	16796	607	sense-overlapping	XM_020818313.2	NW_021318465.1:612673_697825_+	2436	110093434	LOC110093434	aminopeptidase P2	GO:0009507,GO:0009570,GO:0005737,GO:0005829,GO:0046872,GO:0070006	chloroplast|chloroplast stroma|cytoplasm|cytosol|metal ion binding|metalloaminopeptidase activity	-	-
circRNA_0013|NW_021318465.1:673769_675127_+	NW_021318465.1	+	673769	675127	1359	455	sense-overlapping	XM_020818313.2	NW_021318465.1:612673_697825_+	2436	110093434	LOC110093434	aminopeptidase P2	GO:0009507,GO:0009570,GO:0005737,GO:0005829,GO:0046872,GO:0070006	chloroplast|chloroplast stroma|cytoplasm|cytosol|metal ion binding|metalloaminopeptidase activity	-	-
circRNA_0014|NW_021318470.1:97503_114512_+	NW_021318470.1	+	97503	114512	17010	9760	sense-overlapping	XM_020816259.2	NW_021318470.1:97503_118963_+	2877	110091947	LOC110091947	pre-mRNA-splicing factor ATP-dependent RNA helicase DEAH1	-	-	path:dct03040	Spliceosome
circRNA_0015|NW_021318470.1:190118_190636_-	NW_021318470.1	-	190118	190636	519	417	sense-overlapping	XM_020816258.2	NW_021318470.1:183758_205879_-	2841	110091946	LOC110091946	nucleolar MIF4G domain-containing protein 1	GO:0005730,GO:0003723,GO:0042274	nucleolus|RNA binding|ribosomal small subunit biogenesis	-	-
circRNA_0016|NW_021318470.1:190118_191505_-	NW_021318470.1	-	190118	191505	1388	736	sense-overlapping	XM_020816258.2	NW_021318470.1:183758_205879_-	2841	110091946	LOC110091946	nucleolar MIF4G domain-containing protein 1	GO:0005730,GO:0003723,GO:0042274	nucleolus|RNA binding|ribosomal small subunit biogenesis	-	-
circRNA_0017|NW_021318470.1:190925_191505_-	NW_021318470.1	-	190925	191505	581	319	sense-overlapping	XM_020816258.2	NW_021318470.1:183758_205879_-	2841	110091946	LOC110091946	nucleolar MIF4G domain-containing protein 1	GO:0005730,GO:0003723,GO:0042274	nucleolus|RNA binding|ribosomal small subunit biogenesis	-	-
circRNA_0018|NW_021318470.1:327030_327294_-	NW_021318470.1	-	327030	327294	265	180	sense-overlapping	XM_020816248.2	NW_021318470.1:319364_361117_-	2219	110091937	LOC110091937	GTP-binding protein TypA/BipA homolog	GO:0009507,GO:0005829,GO:1990904,GO:0005525,GO:0003924,GO:0003746,GO:0050821,GO:0009409,GO:0006364	chloroplast|cytosol|ribonucleoprotein complex|GTP binding|GTPase activity|translation elongation factor activity|protein stabilization|response to cold|rRNA processing	-	-
circRNA_0019|NW_021318470.1:338247_338593_-	NW_021318470.1	-	338247	338593	347	185	sense-overlapping	XM_020816248.2	NW_021318470.1:319364_361117_-	2219	110091937	LOC110091937	GTP-binding protein TypA/BipA homolog	GO:0009507,GO:0005829,GO:1990904,GO:0005525,GO:0003924,GO:0003746,GO:0050821,GO:0009409,GO:0006364	chloroplast|cytosol|ribonucleoprotein complex|GTP binding|GTPase activity|translation elongation factor activity|protein stabilization|response to cold|rRNA processing	-	-
circRNA_0020|NW_021318470.1:348548_350540_-	NW_021318470.1	-	348548	350540	1993	360	sense-overlapping	XM_020816248.2	NW_021318470.1:319364_361117_-	2219	110091937	LOC110091937	GTP-binding protein TypA/BipA homolog	GO:0009507,GO:0005829,GO:1990904,GO:0005525,GO:0003924,GO:0003746,GO:0050821,GO:0009409,GO:0006364	chloroplast|cytosol|ribonucleoprotein complex|GTP binding|GTPase activity|translation elongation factor activity|protein stabilization|response to cold|rRNA processing	-	-
circRNA_0021|NW_021318470.1:437666_437980_-	NW_021318470.1	-	437666	437980	315	232	sense-overlapping	XM_020844468.2	NW_021318470.1:430826_445939_-	1476	110112294	LOC110112294	probable solanesyl-diphosphate synthase 3, chloroplastic	GO:0009507,GO:0052923,GO:0046872,GO:0050347,GO:0008299	chloroplast|all-trans-nonaprenyl-diphosphate synthase (geranyl-diphosphate specific) activity|metal ion binding|trans-octaprenyltranstransferase activity|isoprenoid biosynthetic process	path:dct00900,path:dct01110	Terpenoid backbone biosynthesis|Biosynthesis of secondary metabolites
circRNA_0022|NW_021318470.1:723765_724376_-	NW_021318470.1	-	723765	724376	612	301	sense-overlapping	XM_020844469.2	NW_021318470.1:691914_764553_-	1957	110112295	LOC110112295	uncharacterized LOC110112295	-	-	-	-
circRNA_0023|NW_021318470.1:723765_737848_-	NW_021318470.1	-	723765	737848	14084	465	sense-overlapping	XM_020844469.2	NW_021318470.1:691914_764553_-	1957	110112295	LOC110112295	uncharacterized LOC110112295	-	-	-	-
circRNA_0024|NW_021318471.1:393463_398045_-	NW_021318471.1	-	393463	398045	4583	440	sense-overlapping	XM_028698552.1	NW_021318471.1:381877_401873_-	1966	110105985	LOC110105985	fimbrin-2-like	GO:0005884,GO:0032432,GO:0005737,GO:0051015,GO:0051017,GO:0051639	actin filament|actin filament bundle|cytoplasm|actin filament binding|actin filament bundle assembly|actin filament network formation	-	-
circRNA_0025|NW_021318471.1:649712_651541_+	NW_021318471.1	+	649712	651541	1830	425	sense-overlapping	XM_020835706.2	NW_021318471.1:647666_674640_+	1779	110105997	LOC110105997	probable peptide/nitrate transporter At3g43790, transcript variant X4	GO:0005887,GO:0009705,GO:0005886,GO:0022821,GO:0090333,GO:0009624	integral component of plasma membrane|plant-type vacuole membrane|plasma membrane|potassium ion antiporter activity|regulation of stomatal closure|response to nematode	-	-
circRNA_0026|NW_021318471.1:655522_658489_+	NW_021318471.1	+	655522	658489	2968	424	sense-overlapping	XM_020835706.2	NW_021318471.1:647666_674640_+	1779	110105997	LOC110105997	probable peptide/nitrate transporter At3g43790, transcript variant X4	GO:0005887,GO:0009705,GO:0005886,GO:0022821,GO:0090333,GO:0009624	integral component of plasma membrane|plant-type vacuole membrane|plasma membrane|potassium ion antiporter activity|regulation of stomatal closure|response to nematode	-	-
circRNA_0027|NW_021318471.1:665109_665725_+	NW_021318471.1	+	665109	665725	617	328	sense-overlapping	XM_020835706.2	NW_021318471.1:647666_674640_+	1779	110105997	LOC110105997	probable peptide/nitrate transporter At3g43790, transcript variant X4	GO:0005887,GO:0009705,GO:0005886,GO:0022821,GO:0090333,GO:0009624	integral component of plasma membrane|plant-type vacuole membrane|plasma membrane|potassium ion antiporter activity|regulation of stomatal closure|response to nematode	-	-
circRNA_0028|NW_021318471.1:665109_670279_+	NW_021318471.1	+	665109	670279	5171	369	sense-overlapping	XM_020835706.2	NW_021318471.1:647666_674640_+	1779	110105997	LOC110105997	probable peptide/nitrate transporter At3g43790, transcript variant X4	GO:0005887,GO:0009705,GO:0005886,GO:0022821,GO:0090333,GO:0009624	integral component of plasma membrane|plant-type vacuole membrane|plasma membrane|potassium ion antiporter activity|regulation of stomatal closure|response to nematode	-	-
circRNA_0029|NW_021318471.1:758124_767165_+	NW_021318471.1	+	758124	767165	9042	9042	intergenic
circRNA_0030|NW_021318471.1:773289_773489_+	NW_021318471.1	+	773289	773489	201	201	exonic	XM_020835670.2	NW_021318471.1:772744_786368_+	575	110105968	LOC110105968	uncharacterized LOC110105968	-	-	-	-
circRNA_0031|NW_021318471.1:792588_793350_+	NW_021318471.1	+	792588	793350	763	638	sense-overlapping	XM_020835713.2	NW_021318471.1:787501_813083_+	2259	110106001	LOC110106001	probable protein arginine N-methyltransferase 3	GO:0005829,GO:0046872,GO:0008168,GO:0003676,GO:0006479	cytosol|metal ion binding|methyltransferase activity|nucleic acid binding|protein methylation	-	-
circRNA_0032|NW_021318471.1:806872_807544_+	NW_021318471.1	+	806872	807544	673	517	sense-overlapping	XM_020835713.2	NW_021318471.1:787501_813083_+	2259	110106001	LOC110106001	probable protein arginine N-methyltransferase 3	GO:0005829,GO:0046872,GO:0008168,GO:0003676,GO:0006479	cytosol|metal ion binding|methyltransferase activity|nucleic acid binding|protein methylation	-	-
circRNA_0033|NW_021318471.1:806883_807544_+	NW_021318471.1	+	806883	807544	662	506	sense-overlapping	XM_020835713.2	NW_021318471.1:787501_813083_+	2259	110106001	LOC110106001	probable protein arginine N-methyltransferase 3	GO:0005829,GO:0046872,GO:0008168,GO:0003676,GO:0006479	cytosol|metal ion binding|methyltransferase activity|nucleic acid binding|protein methylation	-	-
circRNA_0034|NW_021318471.1:839549_858915_+	NW_021318471.1	+	839549	858915	19367	17507	sense-overlapping	XM_020835738.2	NW_021318471.1:839046_842238_+	1156	110106018	LOC110106018	protein IN2-1 homolog B-like, transcript variant X1	GO:0010731	protein glutathionylation	path:dct00480,path:dct01100	Glutathione metabolism|Metabolic pathways
circRNA_0035|NW_021318471.1:840249_852328_+	NW_021318471.1	+	840249	852328	12080	11527	sense-overlapping	XM_020835673.2	NW_021318471.1:851231_856171_+	1257	110105972	LOC110105972	protein IN2-1 homolog B	GO:0010731	protein glutathionylation	path:dct00480,path:dct01100	Glutathione metabolism|Metabolic pathways
circRNA_0036|NW_021318471.1:841570_860032_+	NW_021318471.1	+	841570	860032	18463	17804	sense-overlapping	XM_020835745.2	NW_021318471.1:858583_868778_+	1124	110106023	LOC110106023	protein IN2-1 homolog B	GO:0010731	protein glutathionylation	path:dct00480,path:dct01100	Glutathione metabolism|Metabolic pathways
circRNA_0037|NW_021318471.1:855495_860032_+	NW_021318471.1	+	855495	860032	4538	3879	sense-overlapping	XM_020835745.2	NW_021318471.1:858583_868778_+	1124	110106023	LOC110106023	protein IN2-1 homolog B	GO:0010731	protein glutathionylation	path:dct00480,path:dct01100	Glutathione metabolism|Metabolic pathways
circRNA_0038|NW_021318471.1:890429_890989_+	NW_021318471.1	+	890429	890989	561	324	sense-overlapping	XM_020835714.2	NW_021318471.1:887917_897204_+	3707	110106002	LOC110106002	kinesin-like protein KIN-5A, transcript variant X1	GO:0005737,GO:0005871,GO:0005874,GO:0005819,GO:0005524,GO:0008574,GO:0016887,GO:0008017,GO:0003777,GO:0007018	cytoplasm|kinesin complex|microtubule|spindle|ATP binding|ATP-dependent microtubule motor activity, plus-end-directed|ATPase activity|microtubule binding|microtubule motor activity|microtubule-based movement	-	-
circRNA_0039|NW_021318471.1:1399013_1403710_-	NW_021318471.1	-	1399013	1403710	4698	491	sense-overlapping	XM_020817044.2	NW_021318471.1:1385282_1468731_-	3921	110092476	LOC110092476	protein transport protein Sec24-like CEF	GO:0030127,GO:0005829,GO:0005789,GO:0000139,GO:0008270,GO:0006888,GO:0006886,GO:0006979	COPII vesicle coat|cytosol|endoplasmic reticulum membrane|Golgi membrane|zinc ion binding|endoplasmic reticulum to Golgi vesicle-mediated transport|intracellular protein transport|response to oxidative stress	path:dct04141	Protein processing in endoplasmic reticulum
circRNA_0040|NW_021318471.1:1403546_1410297_-	NW_021318471.1	-	1403546	1410297	6752	382	sense-overlapping	XM_020817044.2	NW_021318471.1:1385282_1468731_-	3921	110092476	LOC110092476	protein transport protein Sec24-like CEF	GO:0030127,GO:0005829,GO:0005789,GO:0000139,GO:0008270,GO:0006888,GO:0006886,GO:0006979	COPII vesicle coat|cytosol|endoplasmic reticulum membrane|Golgi membrane|zinc ion binding|endoplasmic reticulum to Golgi vesicle-mediated transport|intracellular protein transport|response to oxidative stress	path:dct04141	Protein processing in endoplasmic reticulum
circRNA_0041|NW_021318471.1:1409930_1410297_-	NW_021318471.1	-	1409930	1410297	368	217	sense-overlapping	XM_020817044.2	NW_021318471.1:1385282_1468731_-	3921	110092476	LOC110092476	protein transport protein Sec24-like CEF	GO:0030127,GO:0005829,GO:0005789,GO:0000139,GO:0008270,GO:0006888,GO:0006886,GO:0006979	COPII vesicle coat|cytosol|endoplasmic reticulum membrane|Golgi membrane|zinc ion binding|endoplasmic reticulum to Golgi vesicle-mediated transport|intracellular protein transport|response to oxidative stress	path:dct04141	Protein processing in endoplasmic reticulum
circRNA_0042|NW_021318471.1:1430392_1436873_-	NW_021318471.1	-	1430392	1436873	6482	307	sense-overlapping	XM_020817044.2	NW_021318471.1:1385282_1468731_-	3921	110092476	LOC110092476	protein transport protein Sec24-like CEF	GO:0030127,GO:0005829,GO:0005789,GO:0000139,GO:0008270,GO:0006888,GO:0006886,GO:0006979	COPII vesicle coat|cytosol|endoplasmic reticulum membrane|Golgi membrane|zinc ion binding|endoplasmic reticulum to Golgi vesicle-mediated transport|intracellular protein transport|response to oxidative stress	path:dct04141	Protein processing in endoplasmic reticulum
circRNA_0043|NW_021318471.1:1430392_1439316_-	NW_021318471.1	-	1430392	1439316	8925	427	sense-overlapping	XM_020817044.2	NW_021318471.1:1385282_1468731_-	3921	110092476	LOC110092476	protein transport protein Sec24-like CEF	GO:0030127,GO:0005829,GO:0005789,GO:0000139,GO:0008270,GO:0006888,GO:0006886,GO:0006979	COPII vesicle coat|cytosol|endoplasmic reticulum membrane|Golgi membrane|zinc ion binding|endoplasmic reticulum to Golgi vesicle-mediated transport|intracellular protein transport|response to oxidative stress	path:dct04141	Protein processing in endoplasmic reticulum
circRNA_0044|NW_021318471.1:1436793_1460716_-	NW_021318471.1	-	1436793	1460716	23924	852	sense-overlapping	XM_020817044.2	NW_021318471.1:1385282_1468731_-	3921	110092476	LOC110092476	protein transport protein Sec24-like CEF	GO:0030127,GO:0005829,GO:0005789,GO:0000139,GO:0008270,GO:0006888,GO:0006886,GO:0006979	COPII vesicle coat|cytosol|endoplasmic reticulum membrane|Golgi membrane|zinc ion binding|endoplasmic reticulum to Golgi vesicle-mediated transport|intracellular protein transport|response to oxidative stress	path:dct04141	Protein processing in endoplasmic reticulum
circRNA_0045|NW_021318471.1:1460104_1460716_-	NW_021318471.1	-	1460104	1460716	613	411	sense-overlapping	XM_020817044.2	NW_021318471.1:1385282_1468731_-	3921	110092476	LOC110092476	protein transport protein Sec24-like CEF	GO:0030127,GO:0005829,GO:0005789,GO:0000139,GO:0008270,GO:0006888,GO:0006886,GO:0006979	COPII vesicle coat|cytosol|endoplasmic reticulum membrane|Golgi membrane|zinc ion binding|endoplasmic reticulum to Golgi vesicle-mediated transport|intracellular protein transport|response to oxidative stress	path:dct04141	Protein processing in endoplasmic reticulum
circRNA_0046|NW_021318471.1:1797236_1798862_-	NW_021318471.1	-	1797236	1798862	1627	600	sense-overlapping	XM_020817074.2	NW_021318471.1:1795427_1810132_-	3030	110092502	LOC110092502	CRM-domain containing factor CFM3, chloroplastic/mitochondrial	GO:0009507,GO:0009570,GO:0005739,GO:0003723,GO:0000373,GO:0006397	chloroplast|chloroplast stroma|mitochondrion|RNA binding|Group II intron splicing|mRNA processing	-	-
circRNA_0047|NW_021318471.1:2257202_2257466_+	NW_021318471.1	+	2257202	2257466	265	265	exonic	XM_020817091.2	NW_021318471.1:2255078_2284062_+	1334	110092511	LOC110092511	translocase of chloroplast 34, chloroplastic, transcript variant X1	GO:0009507,GO:0009941,GO:0009707,GO:0016021,GO:0005886,GO:0009536,GO:0005525,GO:0003924,GO:0042802,GO:0046872,GO:0015450,GO:0019750,GO:0045036	chloroplast|chloroplast envelope|chloroplast outer membrane|integral component of membrane|plasma membrane|plastid|GTP binding|GTPase activity|identical protein binding|metal ion binding|P-P-bond-hydrolysis-driven protein transmembrane transporter activity|chloroplast localization|protein targeting to chloroplast	-	-
circRNA_0048|NW_021318471.1:2492340_2492963_-	NW_021318471.1	-	2492340	2492963	624	273	sense-overlapping	XM_020841652.2	NW_021318471.1:2482809_2500091_-	1246	110110262	LOC110110262	diacylglycerol O-acyltransferase 2D	GO:0005789,GO:0016021,GO:0005811,GO:0004144,GO:0006071,GO:0019432	endoplasmic reticulum membrane|integral component of membrane|lipid droplet|diacylglycerol O-acyltransferase activity|glycerol metabolic process|triglyceride biosynthetic process	path:dct00561,path:dct01100	Glycerolipid metabolism|Metabolic pathways
circRNA_0049|NW_021318471.1:2581785_2583010_-	NW_021318471.1	-	2581785	2583010	1226	1226	exonic	XM_020841667.2	NW_021318471.1:2522519_2602738_-	5625	110110272	LOC110110272	probable phosphoinositide phosphatase SAC9	GO:0042578	phosphoric ester hydrolase activity	-	-
circRNA_0050|NW_021318471.1:2654726_2655101_-	NW_021318471.1	-	2654726	2655101	376	194	sense-overlapping	XM_020841669.2	NW_021318471.1:2633184_2656455_-	1683	110110274	LOC110110274	SWR1-complex protein 4	GO:0035267,GO:0005634,GO:0000812,GO:0003677,GO:0003714,GO:0006281,GO:0043486,GO:0043968,GO:0043967,GO:0000122	NuA4 histone acetyltransferase complex|nucleus|Swr1 complex|DNA binding|transcription corepressor activity|DNA repair|histone exchange|histone H2A acetylation|histone H4 acetylation|negative regulation of transcription by RNA polymerase II	-	-
circRNA_0051|NW_021318471.1:2732988_2781213_+	NW_021318471.1	+	2732988	2781213	48226	43792	sense-overlapping	XM_020841684.2	NW_021318471.1:2730023_2738437_+	1532	110110288	LOC110110288	protein ROOT HAIR DEFECTIVE 3-like	GO:0005737,GO:0005783,GO:0005789,GO:0016021,GO:0005525,GO:0003924,GO:0016320,GO:0007029	cytoplasm|endoplasmic reticulum|endoplasmic reticulum membrane|integral component of membrane|GTP binding|GTPase activity|endoplasmic reticulum membrane fusion|endoplasmic reticulum organization	-	-
circRNA_0052|NW_021318471.1:2733125_2781394_+	NW_021318471.1	+	2733125	2781394	48270	43925	sense-overlapping	XM_020841684.2	NW_021318471.1:2730023_2738437_+	1532	110110288	LOC110110288	protein ROOT HAIR DEFECTIVE 3-like	GO:0005737,GO:0005783,GO:0005789,GO:0016021,GO:0005525,GO:0003924,GO:0016320,GO:0007029	cytoplasm|endoplasmic reticulum|endoplasmic reticulum membrane|integral component of membrane|GTP binding|GTPase activity|endoplasmic reticulum membrane fusion|endoplasmic reticulum organization	-	-
circRNA_0053|NW_021318471.1:2788669_2853759_+	NW_021318471.1	+	2788669	2853759	65091	65091	sense-overlapping	XM_020841665.2	NW_021318471.1:2769735_2789417_+	3090	110110270	LOC110110270	protein ROOT HAIR DEFECTIVE 3	GO:0005737,GO:0005783,GO:0005789,GO:0016021,GO:0005525,GO:0003924,GO:0016320,GO:0007029	cytoplasm|endoplasmic reticulum|endoplasmic reticulum membrane|integral component of membrane|GTP binding|GTPase activity|endoplasmic reticulum membrane fusion|endoplasmic reticulum organization	-	-
circRNA_0054|NW_021318471.1:2969308_2969938_-	NW_021318471.1	-	2969308	2969938	631	261	sense-overlapping	XM_020841662.2	NW_021318471.1:2967858_2975948_-	2181	110110268	LOC110110268	transmembrane 9 superfamily member 7	GO:0005623,GO:0005737,GO:0005768,GO:0010008,GO:0005794,GO:0000139,GO:0016021,GO:0005634,GO:0005802,GO:0005774,GO:0006878,GO:0006882,GO:0006811,GO:0072657	cell|cytoplasm|endosome|endosome membrane|Golgi apparatus|Golgi membrane|integral component of membrane|nucleus|trans-Golgi network|vacuolar membrane|cellular copper ion homeostasis|cellular zinc ion homeostasis|ion transport|protein localization to membrane	-	-
circRNA_0055|NW_021318471.1:2969308_2970496_-	NW_021318471.1	-	2969308	2970496	1189	819	sense-overlapping	XM_020841662.2	NW_021318471.1:2967858_2975948_-	2181	110110268	LOC110110268	transmembrane 9 superfamily member 7	GO:0005623,GO:0005737,GO:0005768,GO:0010008,GO:0005794,GO:0000139,GO:0016021,GO:0005634,GO:0005802,GO:0005774,GO:0006878,GO:0006882,GO:0006811,GO:0072657	cell|cytoplasm|endosome|endosome membrane|Golgi apparatus|Golgi membrane|integral component of membrane|nucleus|trans-Golgi network|vacuolar membrane|cellular copper ion homeostasis|cellular zinc ion homeostasis|ion transport|protein localization to membrane	-	-
circRNA_0056|NW_021318471.1:2969826_2970496_-	NW_021318471.1	-	2969826	2970496	671	671	sense-overlapping	XM_020841662.2	NW_021318471.1:2967858_2975948_-	2181	110110268	LOC110110268	transmembrane 9 superfamily member 7	GO:0005623,GO:0005737,GO:0005768,GO:0010008,GO:0005794,GO:0000139,GO:0016021,GO:0005634,GO:0005802,GO:0005774,GO:0006878,GO:0006882,GO:0006811,GO:0072657	cell|cytoplasm|endosome|endosome membrane|Golgi apparatus|Golgi membrane|integral component of membrane|nucleus|trans-Golgi network|vacuolar membrane|cellular copper ion homeostasis|cellular zinc ion homeostasis|ion transport|protein localization to membrane	-	-
circRNA_0057|NW_021318474.1:205521_206627_+	NW_021318474.1	+	205521	206627	1107	879	sense-overlapping	XM_020828887.2	NW_021318474.1:195834_235167_+	2366	110101106	LOC110101106	protein EXECUTER 2, chloroplastic	GO:0009507,GO:0042651,GO:0000304	chloroplast|thylakoid membrane|response to singlet oxygen	-	-
circRNA_0058|NW_021318483.1:48944_54783_+	NW_021318483.1	+	48944	54783	5840	357	sense-overlapping	XM_020839010.2	NW_021318483.1:48953_76644_+	1003	110108383	LOC110108383	thioredoxin-like 2, chloroplastic	GO:0005623,GO:0009507,GO:0045454,GO:0055114	cell|chloroplast|cell redox homeostasis|oxidation-reduction process	-	-
circRNA_0059|NW_021318483.1:48953_54783_+	NW_021318483.1	+	48953	54783	5831	348	sense-overlapping	XM_020839010.2	NW_021318483.1:48953_76644_+	1003	110108383	LOC110108383	thioredoxin-like 2, chloroplastic	GO:0005623,GO:0009507,GO:0045454,GO:0055114	cell|chloroplast|cell redox homeostasis|oxidation-reduction process	-	-
circRNA_0060|NW_021318490.1:594435_595775_-	NW_021318490.1	-	594435	595775	1341	286	sense-overlapping	XM_028692946.1	NW_021318490.1:584251_612347_-	1123	110100759	LOC110100759	putative methyltransferase NSUN6, transcript variant X1	-	-	-	-
circRNA_0061|NW_021318491.1:94186_104821_-	NW_021318491.1	-	94186	104821	10636	370	sense-overlapping	XM_020828823.1	NW_021318491.1:91195_117555_-	1415	110101055	LOC110101055	ACT domain-containing protein ACR12	GO:0009507,GO:0009570,GO:0009535,GO:0005886	chloroplast|chloroplast stroma|chloroplast thylakoid membrane|plasma membrane	-	-
circRNA_0062|NW_021318491.1:94186_108735_-	NW_021318491.1	-	94186	108735	14550	588	sense-overlapping	XM_020828823.1	NW_021318491.1:91195_117555_-	1415	110101055	LOC110101055	ACT domain-containing protein ACR12	GO:0009507,GO:0009570,GO:0009535,GO:0005886	chloroplast|chloroplast stroma|chloroplast thylakoid membrane|plasma membrane	-	-
circRNA_0063|NW_021318491.1:378912_381685_-	NW_021318491.1	-	378912	381685	2774	2607	sense-overlapping	XM_020816957.2	NW_021318491.1:369786_394894_-	4730	110092424	LOC110092424	filament-like plant protein 7, transcript variant X1	-	-	-	-
circRNA_0064|NW_021318491.1:461045_461318_-	NW_021318491.1	-	461045	461318	274	194	sense-overlapping	XM_020816971.2	NW_021318491.1:460839_507164_-	2158	110092428	LOC110092428	uncharacterized LOC110092428	-	-	-	-
circRNA_0065|NW_021318491.1:473902_481543_-	NW_021318491.1	-	473902	481543	7642	428	sense-overlapping	XM_020816971.2	NW_021318491.1:460839_507164_-	2158	110092428	LOC110092428	uncharacterized LOC110092428	-	-	-	-
circRNA_0066|NW_021318492.1:343366_349874_+	NW_021318492.1	+	343366	349874	6509	576	sense-overlapping	XM_020832771.2	NW_021318492.1:341207_389827_+	2671	110103892	LOC110103892	probable cytosolic oligopeptidase A	GO:0009507,GO:0009570,GO:0005829,GO:0005759,GO:0009536,GO:0046872,GO:0004222,GO:0006518,GO:0006508	chloroplast|chloroplast stroma|cytosol|mitochondrial matrix|plastid|metal ion binding|metalloendopeptidase activity|peptide metabolic process|proteolysis	-	-
circRNA_0067|NW_021318496.1:336271_336802_+	NW_021318496.1	+	336271	336802	532	449	sense-overlapping	XM_020826864.2	NW_021318496.1:315052_343857_+	1769	110099650	LOC110099650	NAC domain-containing protein 53	GO:0005634,GO:0003700,GO:0044212,GO:0090603,GO:0090602	nucleus|DNA-binding transcription factor activity|transcription regulatory region DNA binding|sieve element differentiation|sieve element enucleation	-	-
circRNA_0068|NW_021318497.1:667630_667833_-	NW_021318497.1	-	667630	667833	204	204	exonic	XM_020823050.2	NW_021318497.1:659116_677083_-	2134	110096901	LOC110096901	glutamyl-tRNA(Gln) amidotransferase subunit B, chloroplastic/mitochondrial, transcript variant X2	GO:0009507,GO:0030956,GO:0005739,GO:0005524,GO:0050567,GO:0070681,GO:0032543	chloroplast|glutamyl-tRNA(Gln) amidotransferase complex|mitochondrion|ATP binding|glutaminyl-tRNA synthase (glutamine-hydrolyzing) activity|glutaminyl-tRNAGln biosynthesis via transamidation|mitochondrial translation	path:dct00970,path:dct01100	Aminoacyl-tRNA biosynthesis|Metabolic pathways
circRNA_0069|NW_021318505.1:1324765_1325337_+	NW_021318505.1	+	1324765	1325337	573	573	intergenic
circRNA_0070|NW_021318505.1:1324765_1327408_+	NW_021318505.1	+	1324765	1327408	2644	2644	intergenic
circRNA_0071|NW_021318505.1:1345570_1346614_+	NW_021318505.1	+	1345570	1346614	1045	631	sense-overlapping	XM_020816375.2	NW_021318505.1:1336714_1420292_+	7623	110092030	LOC110092030	uncharacterized LOC110092030	GO:0005623,GO:0005829,GO:0005768,GO:0019898,GO:0005794,GO:0006886,GO:0045324,GO:0007005,GO:0045053,GO:0006623	cell|cytosol|endosome|extrinsic component of membrane|Golgi apparatus|intracellular protein transport|late endosome to vacuole transport|mitochondrion organization|protein retention in Golgi apparatus|protein targeting to vacuole	-	-
circRNA_0072|NW_021318505.1:1352939_1353806_+	NW_021318505.1	+	1352939	1353806	868	687	sense-overlapping	XM_020816375.2	NW_021318505.1:1336714_1420292_+	7623	110092030	LOC110092030	uncharacterized LOC110092030	GO:0005623,GO:0005829,GO:0005768,GO:0019898,GO:0005794,GO:0006886,GO:0045324,GO:0007005,GO:0045053,GO:0006623	cell|cytosol|endosome|extrinsic component of membrane|Golgi apparatus|intracellular protein transport|late endosome to vacuole transport|mitochondrion organization|protein retention in Golgi apparatus|protein targeting to vacuole	-	-
circRNA_0073|NW_021318505.1:1386547_1388802_+	NW_021318505.1	+	1386547	1388802	2256	1001	sense-overlapping	XM_020816375.2	NW_021318505.1:1336714_1420292_+	7623	110092030	LOC110092030	uncharacterized LOC110092030	GO:0005623,GO:0005829,GO:0005768,GO:0019898,GO:0005794,GO:0006886,GO:0045324,GO:0007005,GO:0045053,GO:0006623	cell|cytosol|endosome|extrinsic component of membrane|Golgi apparatus|intracellular protein transport|late endosome to vacuole transport|mitochondrion organization|protein retention in Golgi apparatus|protein targeting to vacuole	-	-
circRNA_0074|NW_021318505.1:1402603_1403253_+	NW_021318505.1	+	1402603	1403253	651	582	sense-overlapping	XM_020816375.2	NW_021318505.1:1336714_1420292_+	7623	110092030	LOC110092030	uncharacterized LOC110092030	GO:0005623,GO:0005829,GO:0005768,GO:0019898,GO:0005794,GO:0006886,GO:0045324,GO:0007005,GO:0045053,GO:0006623	cell|cytosol|endosome|extrinsic component of membrane|Golgi apparatus|intracellular protein transport|late endosome to vacuole transport|mitochondrion organization|protein retention in Golgi apparatus|protein targeting to vacuole	-	-
circRNA_0075|NW_021318505.1:1613960_1622896_+	NW_021318505.1	+	1613960	1622896	8937	613	sense-overlapping	XM_028693726.1	NW_021318505.1:1582020_1642807_+	2168	110107264	LOC110107264	vacuolar fusion protein MON1 homolog, transcript variant X1	GO:0005768,GO:0005770,GO:0005085,GO:0006886,GO:0045324,GO:0099402,GO:0006623,GO:0007033	endosome|late endosome|guanyl-nucleotide exchange factor activity|intracellular protein transport|late endosome to vacuole transport|plant organ development|protein targeting to vacuole|vacuole organization	-	-
circRNA_0076|NW_021318505.1:1613960_1642539_+	NW_021318505.1	+	1613960	1642539	28580	785	sense-overlapping	XM_028693726.1	NW_021318505.1:1582020_1642807_+	2168	110107264	LOC110107264	vacuolar fusion protein MON1 homolog, transcript variant X1	GO:0005768,GO:0005770,GO:0005085,GO:0006886,GO:0045324,GO:0099402,GO:0006623,GO:0007033	endosome|late endosome|guanyl-nucleotide exchange factor activity|intracellular protein transport|late endosome to vacuole transport|plant organ development|protein targeting to vacuole|vacuole organization	-	-
circRNA_0077|NW_021318505.1:1839372_1840135_-	NW_021318505.1	-	1839372	1840135	764	543	sense-overlapping	XM_020837436.2	NW_021318505.1:1831695_1844217_-	1626	110107240	LOC110107240	uncharacterized LOC110107240	-	-	-	-
circRNA_0078|NW_021318505.1:2186355_2199878_-	NW_021318505.1	-	2186355	2199878	13524	595	sense-overlapping	XM_028693814.1	NW_021318505.1:2176547_2241387_-	2462	110092904	LOC110092904	DNA topoisomerase 3-alpha, transcript variant X7	GO:0005694,GO:0005634,GO:0003677,GO:0003916,GO:0003917,GO:0008270,GO:0006265	chromosome|nucleus|DNA binding|DNA topoisomerase activity|DNA topoisomerase type I (single strand cut, ATP-independent) activity|zinc ion binding|DNA topological change	path:dct03440	Homologous recombination
circRNA_0079|NW_021318505.1:2205798_2206089_-	NW_021318505.1	-	2205798	2206089	292	151	sense-overlapping	XM_028693814.1	NW_021318505.1:2176547_2241387_-	2462	110092904	LOC110092904	DNA topoisomerase 3-alpha, transcript variant X7	GO:0005694,GO:0005634,GO:0003677,GO:0003916,GO:0003917,GO:0008270,GO:0006265	chromosome|nucleus|DNA binding|DNA topoisomerase activity|DNA topoisomerase type I (single strand cut, ATP-independent) activity|zinc ion binding|DNA topological change	path:dct03440	Homologous recombination
circRNA_0080|NW_021318506.1:653322_654991_+	NW_021318506.1	+	653322	654991	1670	642	sense-overlapping	XM_020841206.2	NW_021318506.1:649111_676000_+	1714	110109964	LOC110109964	serine/threonine-protein phosphatase 7	GO:0005829,GO:0005654,GO:0005634,GO:0046872,GO:0004722,GO:0009785,GO:0009408	cytosol|nucleoplasm|nucleus|metal ion binding|protein serine/threonine phosphatase activity|blue light signaling pathway|response to heat	-	-
circRNA_0081|NW_021318506.1:993899_995085_+	NW_021318506.1	+	993899	995085	1187	383	sense-overlapping	XM_020833918.2	NW_021318506.1:905892_1006284_+	3495	110104695	LOC110104695	nardilysin-like, transcript variant X1	GO:0005829,GO:0046872,GO:0004222	cytosol|metal ion binding|metalloendopeptidase activity	-	-
circRNA_0082|NW_021318507.1:99953_122250_-	NW_021318507.1	-	99953	122250	22298	368	antisense	XM_028693930.1	NW_021318507.1:94840_135211_-	3620	110092551	LOC110092551	phototropin-2, transcript variant X1	GO:0005737,GO:0005634,GO:0005886,GO:0005524,GO:0009882,GO:0004674,GO:0006468,GO:0018298	cytoplasm|nucleus|plasma membrane|ATP binding|blue light photoreceptor activity|protein serine/threonine kinase activity|protein phosphorylation|protein-chromophore linkage	-	-
circRNA_0083|NW_021318507.1:111117_124689_-	NW_021318507.1	-	111117	124689	13573	547	sense-overlapping	XM_020817147.2	NW_021318507.1:110237_135209_-	3198	110092551	LOC110092551	phototropin-2, transcript variant X7	GO:0005737,GO:0005634,GO:0005886,GO:0005524,GO:0009882,GO:0004674,GO:0006468,GO:0018298	cytoplasm|nucleus|plasma membrane|ATP binding|blue light photoreceptor activity|protein serine/threonine kinase activity|protein phosphorylation|protein-chromophore linkage	-	-
circRNA_0084|NW_021318507.1:122144_124689_-	NW_021318507.1	-	122144	124689	2546	427	sense-overlapping	XM_020817147.2	NW_021318507.1:110237_135209_-	3198	110092551	LOC110092551	phototropin-2, transcript variant X7	GO:0005737,GO:0005634,GO:0005886,GO:0005524,GO:0009882,GO:0004674,GO:0006468,GO:0018298	cytoplasm|nucleus|plasma membrane|ATP binding|blue light photoreceptor activity|protein serine/threonine kinase activity|protein phosphorylation|protein-chromophore linkage	-	-
circRNA_0085|NW_021318507.1:122144_128395_-	NW_021318507.1	-	122144	128395	6252	594	sense-overlapping	XM_020817147.2	NW_021318507.1:110237_135209_-	3198	110092551	LOC110092551	phototropin-2, transcript variant X7	GO:0005737,GO:0005634,GO:0005886,GO:0005524,GO:0009882,GO:0004674,GO:0006468,GO:0018298	cytoplasm|nucleus|plasma membrane|ATP binding|blue light photoreceptor activity|protein serine/threonine kinase activity|protein phosphorylation|protein-chromophore linkage	-	-
circRNA_0086|NW_021318507.1:122918_124689_-	NW_021318507.1	-	122918	124689	1772	320	sense-overlapping	XM_020817147.2	NW_021318507.1:110237_135209_-	3198	110092551	LOC110092551	phototropin-2, transcript variant X7	GO:0005737,GO:0005634,GO:0005886,GO:0005524,GO:0009882,GO:0004674,GO:0006468,GO:0018298	cytoplasm|nucleus|plasma membrane|ATP binding|blue light photoreceptor activity|protein serine/threonine kinase activity|protein phosphorylation|protein-chromophore linkage	-	-
circRNA_0087|NW_021318507.1:123705_124689_-	NW_021318507.1	-	123705	124689	985	270	sense-overlapping	XM_020817147.2	NW_021318507.1:110237_135209_-	3198	110092551	LOC110092551	phototropin-2, transcript variant X7	GO:0005737,GO:0005634,GO:0005886,GO:0005524,GO:0009882,GO:0004674,GO:0006468,GO:0018298	cytoplasm|nucleus|plasma membrane|ATP binding|blue light photoreceptor activity|protein serine/threonine kinase activity|protein phosphorylation|protein-chromophore linkage	-	-
circRNA_0088|NW_021318507.1:199400_204933_-	NW_021318507.1	-	199400	204933	5534	737	sense-overlapping	XM_020817134.2	NW_021318507.1:155452_220184_-	6993	110092544	LOC110092544	TATA-binding protein-associated factor BTAF1, transcript variant X1	GO:0005634,GO:0005524,GO:0003677,GO:0008094,GO:0004386,GO:1902185	nucleus|ATP binding|DNA binding|DNA-dependent ATPase activity|helicase activity|positive regulation of shoot apical meristem development	-	-
circRNA_0089|NW_021318509.1:211813_212023_+	NW_021318509.1	+	211813	212023	211	211	exonic	XM_028694014.1	NW_021318509.1:203756_212801_+	3259	110105871	LOC110105871	uncharacterized LOC110105871, transcript variant X1	GO:0005634,GO:0005524,GO:0004386,GO:0003723,GO:0009553,GO:0010183,GO:0009875	nucleus|ATP binding|helicase activity|RNA binding|embryo sac development|pollen tube guidance|pollen-pistil interaction	-	-
circRNA_0090|NW_021318513.1:185639_193718_+	NW_021318513.1	+	185639	193718	8080	379	sense-overlapping	XM_020836064.2	NW_021318513.1:160197_210265_+	2075	110106242	LOC110106242	DNA mismatch repair protein MSH5, transcript variant X9	GO:0005694,GO:0005634,GO:0005524,GO:0008094,GO:0030983,GO:0051026,GO:0045143,GO:0006298,GO:0007131,GO:0000712	chromosome|nucleus|ATP binding|DNA-dependent ATPase activity|mismatched DNA binding|chiasma assembly|homologous chromosome segregation|mismatch repair|reciprocal meiotic recombination|resolution of meiotic recombination intermediates	-	-
circRNA_0091|NW_021318513.1:185639_207039_+	NW_021318513.1	+	185639	207039	21401	978	sense-overlapping	XM_020836064.2	NW_021318513.1:160197_210265_+	2075	110106242	LOC110106242	DNA mismatch repair protein MSH5, transcript variant X9	GO:0005694,GO:0005634,GO:0005524,GO:0008094,GO:0030983,GO:0051026,GO:0045143,GO:0006298,GO:0007131,GO:0000712	chromosome|nucleus|ATP binding|DNA-dependent ATPase activity|mismatched DNA binding|chiasma assembly|homologous chromosome segregation|mismatch repair|reciprocal meiotic recombination|resolution of meiotic recombination intermediates	-	-
circRNA_0092|NW_021318513.1:199476_199754_+	NW_021318513.1	+	199476	199754	279	187	sense-overlapping	XM_020836064.2	NW_021318513.1:160197_210265_+	2075	110106242	LOC110106242	DNA mismatch repair protein MSH5, transcript variant X9	GO:0005694,GO:0005634,GO:0005524,GO:0008094,GO:0030983,GO:0051026,GO:0045143,GO:0006298,GO:0007131,GO:0000712	chromosome|nucleus|ATP binding|DNA-dependent ATPase activity|mismatched DNA binding|chiasma assembly|homologous chromosome segregation|mismatch repair|reciprocal meiotic recombination|resolution of meiotic recombination intermediates	-	-
circRNA_0093|NW_021318513.1:365647_380351_-	NW_021318513.1	-	365647	380351	14705	642	sense-overlapping	XM_028694187.1	NW_021318513.1:338382_388998_-	2770	110106252	LOC110106252	uncharacterized LOC110106252	GO:0071339,GO:0005720,GO:0005634,GO:0097344,GO:0006364	MLL1 complex|nuclear heterochromatin|nucleus|Rix1 complex|rRNA processing	-	-
circRNA_0094|NW_021318513.1:633368_633894_+	NW_021318513.1	+	633368	633894	527	264	sense-overlapping	XM_020836043.2	NW_021318513.1:604463_654736_+	3961	110106235	LOC110106235	E3 ubiquitin-protein ligase UPL6, transcript variant X1	GO:0061631,GO:0000209,GO:0006511	ubiquitin conjugating enzyme activity|protein polyubiquitination|ubiquitin-dependent protein catabolic process	path:dct04120	Ubiquitin mediated proteolysis
circRNA_0095|NW_021318513.1:644130_644474_+	NW_021318513.1	+	644130	644474	345	261	sense-overlapping	XM_020836043.2	NW_021318513.1:604463_654736_+	3961	110106235	LOC110106235	E3 ubiquitin-protein ligase UPL6, transcript variant X1	GO:0061631,GO:0000209,GO:0006511	ubiquitin conjugating enzyme activity|protein polyubiquitination|ubiquitin-dependent protein catabolic process	path:dct04120	Ubiquitin mediated proteolysis
circRNA_0096|NW_021318513.1:644130_645666_+	NW_021318513.1	+	644130	645666	1537	342	sense-overlapping	XM_020836043.2	NW_021318513.1:604463_654736_+	3961	110106235	LOC110106235	E3 ubiquitin-protein ligase UPL6, transcript variant X1	GO:0061631,GO:0000209,GO:0006511	ubiquitin conjugating enzyme activity|protein polyubiquitination|ubiquitin-dependent protein catabolic process	path:dct04120	Ubiquitin mediated proteolysis
circRNA_0097|NW_021318515.1:1108674_1110640_-	NW_021318515.1	-	1108674	1110640	1967	382	sense-overlapping	XM_020817742.2	NW_021318515.1:1088381_1127675_-	2179	110093006	LOC110093006	ATP-dependent 6-phosphofructokinase 5, chloroplastic-like	GO:0009507,GO:0003872,GO:0005524,GO:0046872,GO:0006002,GO:0006096	chloroplast|6-phosphofructokinase activity|ATP binding|metal ion binding|fructose 6-phosphate metabolic process|glycolytic process	path:dct00010,path:dct00030,path:dct00051,path:dct00052,path:dct01100,path:dct01110,path:dct01200,path:dct01230,path:dct03018	Glycolysis / Gluconeogenesis|Pentose phosphate pathway|Fructose and mannose metabolism|Galactose metabolism|Metabolic pathways|Biosynthesis of secondary metabolites|Carbon metabolism|Biosynthesis of amino acids|RNA degradation
circRNA_0098|NW_021318515.1:1109966_1110640_-	NW_021318515.1	-	1109966	1110640	675	205	sense-overlapping	XM_020817742.2	NW_021318515.1:1088381_1127675_-	2179	110093006	LOC110093006	ATP-dependent 6-phosphofructokinase 5, chloroplastic-like	GO:0009507,GO:0003872,GO:0005524,GO:0046872,GO:0006002,GO:0006096	chloroplast|6-phosphofructokinase activity|ATP binding|metal ion binding|fructose 6-phosphate metabolic process|glycolytic process	path:dct00010,path:dct00030,path:dct00051,path:dct00052,path:dct01100,path:dct01110,path:dct01200,path:dct01230,path:dct03018	Glycolysis / Gluconeogenesis|Pentose phosphate pathway|Fructose and mannose metabolism|Galactose metabolism|Metabolic pathways|Biosynthesis of secondary metabolites|Carbon metabolism|Biosynthesis of amino acids|RNA degradation
circRNA_0099|NW_021318516.1:37809_39771_-	NW_021318516.1	-	37809	39771	1963	219	sense-overlapping	XM_028694912.1	NW_021318516.1:31067_81794_-	1053	110095072	LOC110095072	probable LL-diaminopimelate aminotransferase, chloroplastic	GO:0009570,GO:0005507,GO:0010285,GO:0030170,GO:0009089,GO:0009862	chloroplast stroma|copper ion binding|L,L-diaminopimelate aminotransferase activity|pyridoxal phosphate binding|lysine biosynthetic process via diaminopimelate|systemic acquired resistance, salicylic acid mediated signaling pathway	path:dct00300,path:dct01100,path:dct01110,path:dct01230	Lysine biosynthesis|Metabolic pathways|Biosynthesis of secondary metabolites|Biosynthesis of amino acids
circRNA_0100|NW_021318516.1:194389_194707_-	NW_021318516.1	-	194389	194707	319	212	sense-overlapping	XM_028694551.1	NW_021318516.1:123249_197665_-	1604	110095074	LOC110095074	uncharacterized aarF domain-containing protein kinase 1, transcript variant X3	-	-	-	-
circRNA_0101|NW_021318516.1:272989_273651_+	NW_021318516.1	+	272989	273651	663	420	sense-overlapping	XM_020820454.2	NW_021318516.1:264727_292364_+	2288	110095075	LOC110095075	anthranilate synthase alpha subunit 1, chloroplastic	GO:0009507,GO:0004049,GO:0000162	chloroplast|anthranilate synthase activity|tryptophan biosynthetic process	path:dct00400,path:dct01100,path:dct01110,path:dct01230	Phenylalanine, tyrosine and tryptophan biosynthesis|Metabolic pathways|Biosynthesis of secondary metabolites|Biosynthesis of amino acids
circRNA_0102|NW_021318516.1:557297_560498_+	NW_021318516.1	+	557297	560498	3202	588	sense-overlapping	XM_028694617.1	NW_021318516.1:554440_574757_+	1837	110103877	LOC110103877	casein kinase 1-like protein 4, transcript variant X10	GO:0005737,GO:0005634,GO:0005524,GO:0004674,GO:0009785,GO:0018105,GO:0009640,GO:0046777,GO:0009637	cytoplasm|nucleus|ATP binding|protein serine/threonine kinase activity|blue light signaling pathway|peptidyl-serine phosphorylation|photomorphogenesis|protein autophosphorylation|response to blue light	-	-
circRNA_0103|NW_021318516.1:558618_559345_+	NW_021318516.1	+	558618	559345	728	149	sense-overlapping	XM_028694617.1	NW_021318516.1:554440_574757_+	1837	110103877	LOC110103877	casein kinase 1-like protein 4, transcript variant X10	GO:0005737,GO:0005634,GO:0005524,GO:0004674,GO:0009785,GO:0018105,GO:0009640,GO:0046777,GO:0009637	cytoplasm|nucleus|ATP binding|protein serine/threonine kinase activity|blue light signaling pathway|peptidyl-serine phosphorylation|photomorphogenesis|protein autophosphorylation|response to blue light	-	-
circRNA_0104|NW_021318516.1:840001_840777_+	NW_021318516.1	+	840001	840777	777	393	sense-overlapping	XM_020847669.2	NW_021318516.1:802163_871086_+	6385	110114710	LOC110114710	phosphatidylinositol 4-kinase alpha 1, transcript variant X1	GO:0005737,GO:0016020,GO:0005634,GO:0048471,GO:0005886,GO:0009506,GO:0004430,GO:0051015,GO:0070300,GO:0005546,GO:0070273,GO:0046854,GO:0048015,GO:0006468	cytoplasm|membrane|nucleus|perinuclear region of cytoplasm|plasma membrane|plasmodesma|1-phosphatidylinositol 4-kinase activity|actin filament binding|phosphatidic acid binding|phosphatidylinositol-4,5-bisphosphate binding|phosphatidylinositol-4-phosphate binding|phosphatidylinositol phosphorylation|phosphatidylinositol-mediated signaling|protein phosphorylation	path:dct00562,path:dct01100,path:dct04070	Inositol phosphate metabolism|Metabolic pathways|Phosphatidylinositol signaling system
circRNA_0105|NW_021318516.1:964158_965164_-	NW_021318516.1	-	964158	965164	1007	372	sense-overlapping	XM_020847682.2	NW_021318516.1:954650_980351_-	1823	110114713	LOC110114713	solanesyl-diphosphate synthase 1, mitochondrial, transcript variant X2	GO:0009507,GO:0005739,GO:0052923,GO:0004311,GO:0046872,GO:0050347,GO:0009793,GO:0008299,GO:0010236,GO:0006744	chloroplast|mitochondrion|all-trans-nonaprenyl-diphosphate synthase (geranyl-diphosphate specific) activity|farnesyltranstransferase activity|metal ion binding|trans-octaprenyltranstransferase activity|embryo development ending in seed dormancy|isoprenoid biosynthetic process|plastoquinone biosynthetic process|ubiquinone biosynthetic process	path:dct00900,path:dct01100,path:dct01110	Terpenoid backbone biosynthesis|Metabolic pathways|Biosynthesis of secondary metabolites
circRNA_0106|NW_021318516.1:1475734_1476056_+	NW_021318516.1	+	1475734	1476056	323	236	sense-overlapping	XM_020839402.2	NW_021318516.1:1463997_1532312_+	1853	110108663	LOC110108663	uncharacterized LOC110108663, transcript variant X2	-	-	-	-
circRNA_0107|NW_021318516.1:1483818_1485241_+	NW_021318516.1	+	1483818	1485241	1424	354	sense-overlapping	XM_020839402.2	NW_021318516.1:1463997_1532312_+	1853	110108663	LOC110108663	uncharacterized LOC110108663, transcript variant X2	-	-	-	-
circRNA_0108|NW_021318516.1:1694838_1707555_-	NW_021318516.1	-	1694838	1707555	12718	466	sense-overlapping	XM_028694776.1	NW_021318516.1:1653445_1720308_-	5289	110108680	LOC110108680	guanine nucleotide exchange factor SPIKE 1, transcript variant X2	GO:0005829,GO:0070971,GO:0005789,GO:0019898,GO:0005634,GO:0005886,GO:0005089,GO:0009734,GO:0007275,GO:0009958,GO:0008064,GO:0010928,GO:0008360,GO:0051493,GO:0007264,GO:0016192	cytosol|endoplasmic reticulum exit site|endoplasmic reticulum membrane|extrinsic component of membrane|nucleus|plasma membrane|Rho guanyl-nucleotide exchange factor activity|auxin-activated signaling pathway|multicellular organism development|positive gravitropism|regulation of actin polymerization or depolymerization|regulation of auxin mediated signaling pathway|regulation of cell shape|regulat…	-	-
circRNA_0109|NW_021318516.1:1706898_1707555_-	NW_021318516.1	-	1706898	1707555	658	272	sense-overlapping	XM_028694776.1	NW_021318516.1:1653445_1720308_-	5289	110108680	LOC110108680	guanine nucleotide exchange factor SPIKE 1, transcript variant X2	GO:0005829,GO:0070971,GO:0005789,GO:0019898,GO:0005634,GO:0005886,GO:0005089,GO:0009734,GO:0007275,GO:0009958,GO:0008064,GO:0010928,GO:0008360,GO:0051493,GO:0007264,GO:0016192	cytosol|endoplasmic reticulum exit site|endoplasmic reticulum membrane|extrinsic component of membrane|nucleus|plasma membrane|Rho guanyl-nucleotide exchange factor activity|auxin-activated signaling pathway|multicellular organism development|positive gravitropism|regulation of actin polymerization or depolymerization|regulation of auxin mediated signaling pathway|regulation of cell shape|regulat…	-	-
circRNA_0110|NW_021318516.1:2236107_2236299_-	NW_021318516.1	-	2236107	2236299	193	100	sense-overlapping	XM_020839398.2	NW_021318516.1:2229237_2236396_-	1085	110108661	LOC110108661	alpha-ketoglutarate-dependent dioxygenase alkB homolog 6, transcript variant X5	-	-	-	-
circRNA_0111|NW_021318516.1:2580335_2586577_+	NW_021318516.1	+	2580335	2586577	6243	399	sense-overlapping	XM_020823333.2	NW_021318516.1:2567897_2591034_+	1630	110097097	LOC110097097	tryptophan--tRNA ligase, cytoplasmic, transcript variant X1	GO:0005737,GO:0005829,GO:0005524,GO:0004830,GO:0006436	cytoplasm|cytosol|ATP binding|tryptophan-tRNA ligase activity|tryptophanyl-tRNA aminoacylation	path:dct00970	Aminoacyl-tRNA biosynthesis
circRNA_0112|NW_021318522.1:241594_242582_-	NW_021318522.1	-	241594	242582	989	189	sense-overlapping	XM_020848312.2	NW_021318522.1:219761_276487_-	1714	110115163	LOC110115163	probable 3-deoxy-D-manno-octulosonic acid transferase, mitochondrial, transcript variant X1	GO:0005739,GO:0005886,GO:0016740,GO:0016757,GO:0036104,GO:0009245	mitochondrion|plasma membrane|transferase activity|transferase activity, transferring glycosyl groups|Kdo2-lipid A biosynthetic process|lipid A biosynthetic process	path:dct01100	Metabolic pathways
circRNA_0113|NW_021318528.1:103826_104337_-	NW_021318528.1	-	103826	104337	512	341	sense-overlapping	XM_020847713.2	NW_021318528.1:103316_180798_-	1234	110114735	LOC110114735	uridine nucleosidase 1, transcript variant X1	GO:0005829,GO:0047622,GO:0047724,GO:0008477,GO:0045437,GO:0072585,GO:0006152,GO:0006218	cytosol|adenosine nucleosidase activity|inosine nucleosidase activity|purine nucleosidase activity|uridine nucleosidase activity|xanthosine nucleotidase activity|purine nucleoside catabolic process|uridine catabolic process	path:dct00240,path:dct00760,path:dct01100	Pyrimidine metabolism|Nicotinate and nicotinamide metabolism|Metabolic pathways
circRNA_0114|NW_021318529.1:194509_195168_-	NW_021318529.1	-	194509	195168	660	311	sense-overlapping	XM_020848928.2	NW_021318529.1:182304_215303_-	2526	110115629	LOC110115629	uncharacterized LOC110115629, transcript variant X5	GO:0009507,GO:0005737,GO:0005829,GO:0005634,GO:0005773,GO:0070009,GO:0004252,GO:0051289,GO:0006508	chloroplast|cytoplasm|cytosol|nucleus|vacuole|serine-type aminopeptidase activity|serine-type endopeptidase activity|protein homotetramerization|proteolysis	-	-
circRNA_0115|NW_021318529.1:194509_215303_-	NW_021318529.1	-	194509	215303	20795	961	sense-overlapping	XM_020848928.2	NW_021318529.1:182304_215303_-	2526	110115629	LOC110115629	uncharacterized LOC110115629, transcript variant X5	GO:0009507,GO:0005737,GO:0005829,GO:0005634,GO:0005773,GO:0070009,GO:0004252,GO:0051289,GO:0006508	chloroplast|cytoplasm|cytosol|nucleus|vacuole|serine-type aminopeptidase activity|serine-type endopeptidase activity|protein homotetramerization|proteolysis	-	-
circRNA_0116|NW_021318529.1:208530_215303_-	NW_021318529.1	-	208530	215303	6774	139	sense-overlapping	XM_020848928.2	NW_021318529.1:182304_215303_-	2526	110115629	LOC110115629	uncharacterized LOC110115629, transcript variant X5	GO:0009507,GO:0005737,GO:0005829,GO:0005634,GO:0005773,GO:0070009,GO:0004252,GO:0051289,GO:0006508	chloroplast|cytoplasm|cytosol|nucleus|vacuole|serine-type aminopeptidase activity|serine-type endopeptidase activity|protein homotetramerization|proteolysis	-	-
circRNA_0117|NW_021318533.1:62888_66518_+	NW_021318533.1	+	62888	66518	3631	205	sense-overlapping	XM_020823567.2	NW_021318533.1:30451_68034_+	1273	110097285	LOC110097285	putative hydrolase C777.06c	GO:0005829,GO:0005634,GO:0016787	cytosol|nucleus|hydrolase activity	-	-
circRNA_0118|NW_021318533.1:806793_807730_-	NW_021318533.1	-	806793	807730	938	170	sense-overlapping	XM_020823264.2	NW_021318533.1:771546_837147_-	1587	110097051	LOC110097051	uncharacterized LOC110097051	-	-	-	-
circRNA_0119|NW_021318533.1:928867_936117_-	NW_021318533.1	-	928867	936117	7251	669	sense-overlapping	XM_028695434.1	NW_021318533.1:880116_1011096_-	3981	110097045	LOC110097045	HEAT repeat-containing protein 6	-	-	-	-
circRNA_0120|NW_021318533.1:953961_954833_-	NW_021318533.1	-	953961	954833	873	290	sense-overlapping	XM_028695434.1	NW_021318533.1:880116_1011096_-	3981	110097045	LOC110097045	HEAT repeat-containing protein 6	-	-	-	-
circRNA_0121|NW_021318533.1:954011_954833_-	NW_021318533.1	-	954011	954833	823	240	sense-overlapping	XM_028695434.1	NW_021318533.1:880116_1011096_-	3981	110097045	LOC110097045	HEAT repeat-containing protein 6	-	-	-	-
circRNA_0122|NW_021318533.1:966904_983609_-	NW_021318533.1	-	966904	983609	16706	568	sense-overlapping	XM_028695434.1	NW_021318533.1:880116_1011096_-	3981	110097045	LOC110097045	HEAT repeat-containing protein 6	-	-	-	-
circRNA_0123|NW_021318533.1:1480858_1481868_+	NW_021318533.1	+	1480858	1481868	1011	149	sense-overlapping	XM_020823265.2	NW_021318533.1:1455889_1495678_+	1499	110097052	LOC110097052	protein GUCD1, transcript variant X2	GO:0004383,GO:0006182	guanylate cyclase activity|cGMP biosynthetic process	-	-
circRNA_0124|NW_021318533.1:1513364_1513616_+	NW_021318533.1	+	1513364	1513616	253	253	exonic	XM_020823274.2	NW_021318533.1:1512367_1514508_+	1808	110097056	LOC110097056	uncharacterized LOC110097056	-	-	-	-
circRNA_0125|NW_021318533.1:1848364_1850828_+	NW_021318533.1	+	1848364	1850828	2465	584	sense-overlapping	XM_028695486.1	NW_021318533.1:1844052_1852915_+	1575	110104250	LOC110104250	E3 ubiquitin-protein ligase RGLG3, transcript variant X1	GO:0005737,GO:0005634,GO:0046872,GO:0004842,GO:0042742,GO:0009867,GO:0009611	cytoplasm|nucleus|metal ion binding|ubiquitin-protein transferase activity|defense response to bacterium|jasmonic acid mediated signaling pathway|response to wounding	-	-
circRNA_0126|NW_021318533.1:2278160_2279111_-	NW_021318533.1	-	2278160	2279111	952	617	sense-overlapping	XM_020819325.2	NW_021318533.1:2268562_2296829_-	3818	110094160	LOC110094160	protein transport protein Sec24-like At3g07100, transcript variant X1	GO:0030127,GO:0005789,GO:0000139,GO:0008270,GO:0007029,GO:0006888,GO:0080119,GO:0007030,GO:0006886,GO:0048232,GO:0032876,GO:0008361	COPII vesicle coat|endoplasmic reticulum membrane|Golgi membrane|zinc ion binding|endoplasmic reticulum organization|endoplasmic reticulum to Golgi vesicle-mediated transport|ER body organization|Golgi organization|intracellular protein transport|male gamete generation|negative regulation of DNA endoreduplication|regulation of cell size	path:dct04141	Protein processing in endoplasmic reticulum
circRNA_0127|NW_021318534.1:199452_213586_-	NW_021318534.1	-	199452	213586	14135	141	sense-overlapping	XM_028695794.1	NW_021318534.1:194185_245019_-	4118	110104664	LOC110104664	probable serine/threonine protein kinase IRE4, transcript variant X1	GO:0005524,GO:0046872,GO:0004674,GO:0035556,GO:0018105	ATP binding|metal ion binding|protein serine/threonine kinase activity|intracellular signal transduction|peptidyl-serine phosphorylation	-	-
circRNA_0128|NW_021318534.1:220959_221314_-	NW_021318534.1	-	220959	221314	356	276	sense-overlapping	XM_028695794.1	NW_021318534.1:194185_245019_-	4118	110104664	LOC110104664	probable serine/threonine protein kinase IRE4, transcript variant X1	GO:0005524,GO:0046872,GO:0004674,GO:0035556,GO:0018105	ATP binding|metal ion binding|protein serine/threonine kinase activity|intracellular signal transduction|peptidyl-serine phosphorylation	-	-
circRNA_0129|NW_021318534.1:221531_222499_-	NW_021318534.1	-	221531	222499	969	342	sense-overlapping	XM_028695794.1	NW_021318534.1:194185_245019_-	4118	110104664	LOC110104664	probable serine/threonine protein kinase IRE4, transcript variant X1	GO:0005524,GO:0046872,GO:0004674,GO:0035556,GO:0018105	ATP binding|metal ion binding|protein serine/threonine kinase activity|intracellular signal transduction|peptidyl-serine phosphorylation	-	-
circRNA_0130|NW_021318534.1:224246_224788_-	NW_021318534.1	-	224246	224788	543	417	sense-overlapping	XM_028695794.1	NW_021318534.1:194185_245019_-	4118	110104664	LOC110104664	probable serine/threonine protein kinase IRE4, transcript variant X1	GO:0005524,GO:0046872,GO:0004674,GO:0035556,GO:0018105	ATP binding|metal ion binding|protein serine/threonine kinase activity|intracellular signal transduction|peptidyl-serine phosphorylation	-	-
circRNA_0131|NW_021318534.1:448953_450023_-	NW_021318534.1	-	448953	450023	1071	284	sense-overlapping	XM_020833893.2	NW_021318534.1:426281_465222_-	1150	110104676	LOC110104676	nuclear cap-binding protein subunit 2	GO:0005737,GO:0005846,GO:0005634,GO:0000339,GO:0031047,GO:0045292,GO:0000398	cytoplasm|nuclear cap binding complex|nucleus|RNA cap binding|gene silencing by RNA|mRNA cis splicing, via spliceosome|mRNA splicing, via spliceosome	path:dct03013,path:dct03015,path:dct03040	RNA transport|mRNA surveillance pathway|Spliceosome
circRNA_0132|NW_021318534.1:448953_463282_-	NW_021318534.1	-	448953	463282	14330	13543	sense-overlapping	XM_020833893.2	NW_021318534.1:426281_465222_-	1150	110104676	LOC110104676	nuclear cap-binding protein subunit 2	GO:0005737,GO:0005846,GO:0005634,GO:0000339,GO:0031047,GO:0045292,GO:0000398	cytoplasm|nuclear cap binding complex|nucleus|RNA cap binding|gene silencing by RNA|mRNA cis splicing, via spliceosome|mRNA splicing, via spliceosome	path:dct03013,path:dct03015,path:dct03040	RNA transport|mRNA surveillance pathway|Spliceosome
circRNA_0133|NW_021318534.1:574759_575284_+	NW_021318534.1	+	574759	575284	526	354	sense-overlapping	XM_028695854.1	NW_021318534.1:573634_579329_+	769	110104662	LOC110104662	chloroplastic import inner membrane translocase subunit TIM22-2, transcript variant X2	GO:0009507,GO:0009941,GO:0009707,GO:0016021,GO:0005739,GO:0042803,GO:0008320,GO:0045039,GO:0045036	chloroplast|chloroplast envelope|chloroplast outer membrane|integral component of membrane|mitochondrion|protein homodimerization activity|protein transmembrane transporter activity|protein insertion into mitochondrial inner membrane|protein targeting to chloroplast	-	-
circRNA_0134|NW_021318534.1:782308_782898_+	NW_021318534.1	+	782308	782898	591	187	sense-overlapping	XM_020839159.2	NW_021318534.1:769755_801468_+	4928	110108489	LOC110108489	uncharacterized LOC110108489, transcript variant X1	GO:0005634,GO:0009506,GO:0010385,GO:0004402,GO:0042393,GO:0046872,GO:0044154,GO:0043971,GO:0043972,GO:0044030,GO:0080188	nucleus|plasmodesma|double-stranded methylated DNA binding|histone acetyltransferase activity|histone binding|metal ion binding|histone H3-K14 acetylation|histone H3-K18 acetylation|histone H3-K23 acetylation|regulation of DNA methylation|RNA-directed DNA methylation	-	-
circRNA_0135|NW_021318534.1:972567_984376_+	NW_021318534.1	+	972567	984376	11810	195	sense-overlapping	XM_020839167.2	NW_021318534.1:951635_990506_+	1173	110108496	LOC110108496	protein CHLOROPLAST ENHANCING STRESS TOLERANCE, chloroplastic, transcript variant X1	GO:0009535,GO:0016021,GO:0009658,GO:0010286,GO:0042538,GO:0048564,GO:0080183,GO:0009414	chloroplast thylakoid membrane|integral component of membrane|chloroplast organization|heat acclimation|hyperosmotic salinity response|photosystem I assembly|response to photooxidative stress|response to water deprivation	-	-
circRNA_0136|NW_021318534.1:989592_990285_+	NW_021318534.1	+	989592	990285	694	258	sense-overlapping	XM_020839167.2	NW_021318534.1:951635_990506_+	1173	110108496	LOC110108496	protein CHLOROPLAST ENHANCING STRESS TOLERANCE, chloroplastic, transcript variant X1	GO:0009535,GO:0016021,GO:0009658,GO:0010286,GO:0042538,GO:0048564,GO:0080183,GO:0009414	chloroplast thylakoid membrane|integral component of membrane|chloroplast organization|heat acclimation|hyperosmotic salinity response|photosystem I assembly|response to photooxidative stress|response to water deprivation	-	-
circRNA_0137|NW_021318534.1:1053667_1078915_+	NW_021318534.1	+	1053667	1078915	25249	534	sense-overlapping	XM_020839172.2	NW_021318534.1:1020633_1078915_+	3502	110108498	LOC110108498	protein BLISTER, transcript variant X1	-	-	-	-
circRNA_0138|NW_021318534.1:1063736_1069790_+	NW_021318534.1	+	1063736	1069790	6055	182	sense-overlapping	XM_020839172.2	NW_021318534.1:1020633_1078915_+	3502	110108498	LOC110108498	protein BLISTER, transcript variant X1	-	-	-	-
circRNA_0139|NW_021318534.1:1063736_1078915_+	NW_021318534.1	+	1063736	1078915	15180	457	sense-overlapping	XM_020839172.2	NW_021318534.1:1020633_1078915_+	3502	110108498	LOC110108498	protein BLISTER, transcript variant X1	-	-	-	-
circRNA_0140|NW_021318534.1:1078487_1078915_+	NW_021318534.1	+	1078487	1078915	429	275	sense-overlapping	XM_020839172.2	NW_021318534.1:1020633_1078915_+	3502	110108498	LOC110108498	protein BLISTER, transcript variant X1	-	-	-	-
circRNA_0141|NW_021318534.1:1127392_1134058_+	NW_021318534.1	+	1127392	1134058	6667	545	sense-overlapping	XM_028695664.1	NW_021318534.1:1105917_1162988_+	2734	110108491	LOC110108491	protein GRIP	GO:0005802,GO:0048193,GO:0007131	trans-Golgi network|Golgi vesicle transport|reciprocal meiotic recombination	-	-
circRNA_0142|NW_021318534.1:1651902_1652127_+	NW_021318534.1	+	1651902	1652127	226	134	sense-overlapping	XM_020817840.2	NW_021318534.1:1612834_1663889_+	1293	110093074	LOC110093074	protein MON2 homolog	-	-	-	-
circRNA_0143|NW_021318534.1:2179838_2185171_-	NW_021318534.1	-	2179838	2185171	5334	269	sense-overlapping	XM_020816938.2	NW_021318534.1:2166275_2216219_-	2469	110092410	LOC110092410	alpha-mannosidase I MNS5, transcript variant X1	GO:0005783,GO:0005789,GO:0016021,GO:0004559,GO:0005509,GO:0004571,GO:0006486,GO:0030433	endoplasmic reticulum|endoplasmic reticulum membrane|integral component of membrane|alpha-mannosidase activity|calcium ion binding|mannosyl-oligosaccharide 1,2-alpha-mannosidase activity|protein glycosylation|ubiquitin-dependent ERAD pathway	path:dct04141	Protein processing in endoplasmic reticulum
circRNA_0144|NW_021318534.1:2184915_2185171_-	NW_021318534.1	-	2184915	2185171	257	168	sense-overlapping	XM_020816938.2	NW_021318534.1:2166275_2216219_-	2469	110092410	LOC110092410	alpha-mannosidase I MNS5, transcript variant X1	GO:0005783,GO:0005789,GO:0016021,GO:0004559,GO:0005509,GO:0004571,GO:0006486,GO:0030433	endoplasmic reticulum|endoplasmic reticulum membrane|integral component of membrane|alpha-mannosidase activity|calcium ion binding|mannosyl-oligosaccharide 1,2-alpha-mannosidase activity|protein glycosylation|ubiquitin-dependent ERAD pathway	path:dct04141	Protein processing in endoplasmic reticulum
circRNA_0145|NW_021318534.1:2192341_2192658_-	NW_021318534.1	-	2192341	2192658	318	229	sense-overlapping	XM_020816938.2	NW_021318534.1:2166275_2216219_-	2469	110092410	LOC110092410	alpha-mannosidase I MNS5, transcript variant X1	GO:0005783,GO:0005789,GO:0016021,GO:0004559,GO:0005509,GO:0004571,GO:0006486,GO:0030433	endoplasmic reticulum|endoplasmic reticulum membrane|integral component of membrane|alpha-mannosidase activity|calcium ion binding|mannosyl-oligosaccharide 1,2-alpha-mannosidase activity|protein glycosylation|ubiquitin-dependent ERAD pathway	path:dct04141	Protein processing in endoplasmic reticulum
circRNA_0146|NW_021318534.1:2393366_2394793_-	NW_021318534.1	-	2393366	2394793	1428	163	sense-overlapping	XM_020848444.2	NW_021318534.1:2384449_2412096_-	1125	110115255	LOC110115255	CBBY-like protein	GO:0009507,GO:0009941,GO:0009570,GO:0005829,GO:0016787,GO:0046872	chloroplast|chloroplast envelope|chloroplast stroma|cytosol|hydrolase activity|metal ion binding	-	-
circRNA_0147|NW_021318534.1:2393366_2402458_-	NW_021318534.1	-	2393366	2402458	9093	393	sense-overlapping	XM_020848444.2	NW_021318534.1:2384449_2412096_-	1125	110115255	LOC110115255	CBBY-like protein	GO:0009507,GO:0009941,GO:0009570,GO:0005829,GO:0016787,GO:0046872	chloroplast|chloroplast envelope|chloroplast stroma|cytosol|hydrolase activity|metal ion binding	-	-
circRNA_0148|NW_021318534.1:2435905_2437039_-	NW_021318534.1	-	2435905	2437039	1135	377	sense-overlapping	XM_020848449.2	NW_021318534.1:2429958_2448789_-	2005	110115258	LOC110115258	alanine aminotransferase 2	GO:0005739,GO:0004021,GO:0030170,GO:0009058,GO:0042853,GO:0001666	mitochondrion|L-alanine:2-oxoglutarate aminotransferase activity|pyridoxal phosphate binding|biosynthetic process|L-alanine catabolic process|response to hypoxia	path:dct00220,path:dct00250,path:dct00710,path:dct01100,path:dct01200,path:dct01210,path:dct01230	Arginine biosynthesis|Alanine, aspartate and glutamate metabolism|Carbon fixation in photosynthetic organisms|Metabolic pathways|Carbon metabolism|2-Oxocarboxylic acid metabolism|Biosynthesis of amino acids
circRNA_0149|NW_021318534.1:2904390_2904828_+	NW_021318534.1	+	2904390	2904828	439	335	sense-overlapping	XM_020843629.2	NW_021318534.1:2839614_2943973_+	3400	110111655	LOC110111655	protein ALWAYS EARLY 2, transcript variant X6	GO:0005654,GO:0017053,GO:0003677,GO:0051726,GO:0000003,GO:0006351	nucleoplasm|transcriptional repressor complex|DNA binding|regulation of cell cycle|reproduction|transcription, DNA-templated	-	-
circRNA_0150|NW_021318534.1:2923791_2924722_+	NW_021318534.1	+	2923791	2924722	932	786	sense-overlapping	XM_020843629.2	NW_021318534.1:2839614_2943973_+	3400	110111655	LOC110111655	protein ALWAYS EARLY 2, transcript variant X6	GO:0005654,GO:0017053,GO:0003677,GO:0051726,GO:0000003,GO:0006351	nucleoplasm|transcriptional repressor complex|DNA binding|regulation of cell cycle|reproduction|transcription, DNA-templated	-	-
circRNA_0151|NW_021318534.1:2924191_2924369_+	NW_021318534.1	+	2924191	2924369	179	179	exonic	XM_020843629.2	NW_021318534.1:2839614_2943973_+	3400	110111655	LOC110111655	protein ALWAYS EARLY 2, transcript variant X6	GO:0005654,GO:0017053,GO:0003677,GO:0051726,GO:0000003,GO:0006351	nucleoplasm|transcriptional repressor complex|DNA binding|regulation of cell cycle|reproduction|transcription, DNA-templated	-	-
circRNA_0152|NW_021318534.1:3232880_3233461_+	NW_021318534.1	+	3232880	3233461	582	388	sense-overlapping	XM_020827790.2	NW_021318534.1:3221932_3257439_+	6572	110100339	LOC110100339	homeobox-DDT domain protein RLT2	GO:0005634,GO:0003700,GO:0043565,GO:0009908,GO:0045892,GO:0006351,GO:0010228	nucleus|DNA-binding transcription factor activity|sequence-specific DNA binding|flower development|negative regulation of transcription, DNA-templated|transcription, DNA-templated|vegetative to reproductive phase transition of meristem	-	-
circRNA_0153|NW_021318534.1:3659972_3711851_-	NW_021318534.1	-	3659972	3711851	51880	359	sense-overlapping	XM_020827792.2	NW_021318534.1:3642227_3733012_-	1570	110100342	LOC110100342	THO complex subunit 6, transcript variant X1	GO:0080008,GO:0005739,GO:0005634,GO:0000347,GO:0003723,GO:0009738,GO:0031047,GO:0006397,GO:0051028,GO:0009788,GO:0010267,GO:0016567,GO:0008380	Cul4-RING E3 ubiquitin ligase complex|mitochondrion|nucleus|THO complex|RNA binding|abscisic acid-activated signaling pathway|gene silencing by RNA|mRNA processing|mRNA transport|negative regulation of abscisic acid-activated signaling pathway|production of ta-siRNAs involved in RNA interference|protein ubiquitination|RNA splicing	path:dct03013	RNA transport
circRNA_0154|NW_021318534.1:3674229_3675657_-	NW_021318534.1	-	3674229	3675657	1429	196	sense-overlapping	XM_020827792.2	NW_021318534.1:3642227_3733012_-	1570	110100342	LOC110100342	THO complex subunit 6, transcript variant X1	GO:0080008,GO:0005739,GO:0005634,GO:0000347,GO:0003723,GO:0009738,GO:0031047,GO:0006397,GO:0051028,GO:0009788,GO:0010267,GO:0016567,GO:0008380	Cul4-RING E3 ubiquitin ligase complex|mitochondrion|nucleus|THO complex|RNA binding|abscisic acid-activated signaling pathway|gene silencing by RNA|mRNA processing|mRNA transport|negative regulation of abscisic acid-activated signaling pathway|production of ta-siRNAs involved in RNA interference|protein ubiquitination|RNA splicing	path:dct03013	RNA transport
circRNA_0155|NW_021318534.1:3674229_3711851_-	NW_021318534.1	-	3674229	3711851	37623	319	sense-overlapping	XM_020827792.2	NW_021318534.1:3642227_3733012_-	1570	110100342	LOC110100342	THO complex subunit 6, transcript variant X1	GO:0080008,GO:0005739,GO:0005634,GO:0000347,GO:0003723,GO:0009738,GO:0031047,GO:0006397,GO:0051028,GO:0009788,GO:0010267,GO:0016567,GO:0008380	Cul4-RING E3 ubiquitin ligase complex|mitochondrion|nucleus|THO complex|RNA binding|abscisic acid-activated signaling pathway|gene silencing by RNA|mRNA processing|mRNA transport|negative regulation of abscisic acid-activated signaling pathway|production of ta-siRNAs involved in RNA interference|protein ubiquitination|RNA splicing	path:dct03013	RNA transport
circRNA_0156|NW_021318541.1:139236_140271_-	NW_021318541.1	-	139236	140271	1036	473	sense-overlapping	XM_028696088.1	NW_021318541.1:109365_152012_-	2295	110100829	LOC110100829	uncharacterized LOC110100829	-	-	-	-
circRNA_0157|NW_021318542.1:380182_380524_-	NW_021318542.1	-	380182	380524	343	241	sense-overlapping	XM_020833604.2	NW_021318542.1:372991_391681_-	1758	110104469	LOC110104469	rho GTPase-activating protein 5	GO:0005886,GO:0009531,GO:0005096,GO:0007275,GO:0009664,GO:0007165	plasma membrane|secondary cell wall|GTPase activator activity|multicellular organism development|plant-type cell wall organization|signal transduction	-	-
circRNA_0158|NW_021318542.1:909727_932905_-	NW_021318542.1	-	909727	932905	23179	12490	sense-overlapping	XM_020833551.2	NW_021318542.1:921500_989723_-	2122	110104442	LOC110104442	glucose-6-phosphate 1-dehydrogenase, cytoplasmic isoform, transcript variant X1	GO:0005737,GO:0004345,GO:0050661,GO:0006006,GO:0006098	cytoplasm|glucose-6-phosphate dehydrogenase activity|NADP binding|glucose metabolic process|pentose-phosphate shunt	path:dct00030,path:dct00480,path:dct01100,path:dct01110,path:dct01200	Pentose phosphate pathway|Glutathione metabolism|Metabolic pathways|Biosynthesis of secondary metabolites|Carbon metabolism
circRNA_0159|NW_021318543.1:84005_91291_+	NW_021318543.1	+	84005	91291	7287	518	sense-overlapping	XM_028696501.1	NW_021318543.1:82430_114150_+	1573	110096518	LOC110096518	probable acetyl-CoA acetyltransferase, cytosolic 2	GO:0005737,GO:0003985,GO:0003988,GO:0046872,GO:0006635	cytoplasm|acetyl-CoA C-acetyltransferase activity|acetyl-CoA C-acyltransferase activity|metal ion binding|fatty acid beta-oxidation	path:dct00071,path:dct00072,path:dct00280,path:dct00310,path:dct00380,path:dct00620,path:dct00630,path:dct00640,path:dct00650,path:dct00900,path:dct01100,path:dct01110,path:dct01200,path:dct01212	Fatty acid degradation|Synthesis and degradation of ketone bodies|Valine, leucine and isoleucine degradation|Lysine degradation|Tryptophan metabolism|Pyruvate metabolism|Glyoxylate and dicarboxylate metabolism|Propanoate metabolism|Butanoate metabolism|Terpenoid backbone biosynthesis|Metabolic pathways|Biosynthesis of secondary metabolites|Carbon metabolism|Fatty acid metabolism
circRNA_0160|NW_021318543.1:91153_101560_+	NW_021318543.1	+	91153	101560	10408	369	sense-overlapping	XM_028696501.1	NW_021318543.1:82430_114150_+	1573	110096518	LOC110096518	probable acetyl-CoA acetyltransferase, cytosolic 2	GO:0005737,GO:0003985,GO:0003988,GO:0046872,GO:0006635	cytoplasm|acetyl-CoA C-acetyltransferase activity|acetyl-CoA C-acyltransferase activity|metal ion binding|fatty acid beta-oxidation	path:dct00071,path:dct00072,path:dct00280,path:dct00310,path:dct00380,path:dct00620,path:dct00630,path:dct00640,path:dct00650,path:dct00900,path:dct01100,path:dct01110,path:dct01200,path:dct01212	Fatty acid degradation|Synthesis and degradation of ketone bodies|Valine, leucine and isoleucine degradation|Lysine degradation|Tryptophan metabolism|Pyruvate metabolism|Glyoxylate and dicarboxylate metabolism|Propanoate metabolism|Butanoate metabolism|Terpenoid backbone biosynthesis|Metabolic pathways|Biosynthesis of secondary metabolites|Carbon metabolism|Fatty acid metabolism
circRNA_0161|NW_021318543.1:100491_101560_+	NW_021318543.1	+	100491	101560	1070	230	sense-overlapping	XM_028696501.1	NW_021318543.1:82430_114150_+	1573	110096518	LOC110096518	probable acetyl-CoA acetyltransferase, cytosolic 2	GO:0005737,GO:0003985,GO:0003988,GO:0046872,GO:0006635	cytoplasm|acetyl-CoA C-acetyltransferase activity|acetyl-CoA C-acyltransferase activity|metal ion binding|fatty acid beta-oxidation	path:dct00071,path:dct00072,path:dct00280,path:dct00310,path:dct00380,path:dct00620,path:dct00630,path:dct00640,path:dct00650,path:dct00900,path:dct01100,path:dct01110,path:dct01200,path:dct01212	Fatty acid degradation|Synthesis and degradation of ketone bodies|Valine, leucine and isoleucine degradation|Lysine degradation|Tryptophan metabolism|Pyruvate metabolism|Glyoxylate and dicarboxylate metabolism|Propanoate metabolism|Butanoate metabolism|Terpenoid backbone biosynthesis|Metabolic pathways|Biosynthesis of secondary metabolites|Carbon metabolism|Fatty acid metabolism
circRNA_0162|NW_021318543.1:213304_213685_+	NW_021318543.1	+	213304	213685	382	307	sense-overlapping	XM_020822527.2	NW_021318543.1:184223_247784_+	2237	110096523	LOC110096523	ubiquitin-like-specific protease 1D, transcript variant X1	GO:0016607,GO:0005634,GO:0070139,GO:0070140,GO:0016926,GO:0009651,GO:0010228	nuclear speck|nucleus|SUMO-specific endopeptidase activity|SUMO-specific isopeptidase activity|protein desumoylation|response to salt stress|vegetative to reproductive phase transition of meristem	-	-
circRNA_0163|NW_021318543.1:219419_219874_+	NW_021318543.1	+	219419	219874	456	218	sense-overlapping	XM_020822527.2	NW_021318543.1:184223_247784_+	2237	110096523	LOC110096523	ubiquitin-like-specific protease 1D, transcript variant X1	GO:0016607,GO:0005634,GO:0070139,GO:0070140,GO:0016926,GO:0009651,GO:0010228	nuclear speck|nucleus|SUMO-specific endopeptidase activity|SUMO-specific isopeptidase activity|protein desumoylation|response to salt stress|vegetative to reproductive phase transition of meristem	-	-
circRNA_0164|NW_021318543.1:225780_226119_+	NW_021318543.1	+	225780	226119	340	198	sense-overlapping	XM_020822527.2	NW_021318543.1:184223_247784_+	2237	110096523	LOC110096523	ubiquitin-like-specific protease 1D, transcript variant X1	GO:0016607,GO:0005634,GO:0070139,GO:0070140,GO:0016926,GO:0009651,GO:0010228	nuclear speck|nucleus|SUMO-specific endopeptidase activity|SUMO-specific isopeptidase activity|protein desumoylation|response to salt stress|vegetative to reproductive phase transition of meristem	-	-
circRNA_0165|NW_021318543.1:314142_319044_+	NW_021318543.1	+	314142	319044	4903	980	sense-overlapping	XM_028696548.1	NW_021318543.1:312122_333072_+	1816	110096504	LOC110096504	peroxisomal membrane protein PEX14, transcript variant X2	GO:0005829,GO:0016021,GO:0005739,GO:1990429,GO:0005778,GO:0005777,GO:0005886,GO:0009536,GO:0005102,GO:0007031,GO:0016560,GO:0006625	cytosol|integral component of membrane|mitochondrion|peroxisomal importomer complex|peroxisomal membrane|peroxisome|plasma membrane|plastid|signaling receptor binding|peroxisome organization|protein import into peroxisome matrix, docking|protein targeting to peroxisome	path:dct04146	Peroxisome
circRNA_0166|NW_021318543.1:352958_353286_-	NW_021318543.1	-	352958	353286	329	242	sense-overlapping	XM_020822508.2	NW_021318543.1:349096_362497_-	2758	110096513	LOC110096513	inorganic pyrophosphatase TTM2	GO:0016021,GO:0005741,GO:0005524,GO:0004427,GO:0016301,GO:0016462,GO:0009814,GO:1900425,GO:1902289,GO:0010113,GO:0009626,GO:2000031,GO:0002237,GO:0002239,GO:0009751	integral component of membrane|mitochondrial outer membrane|ATP binding|inorganic diphosphatase activity|kinase activity|pyrophosphatase activity|defense response, incompatible interaction|negative regulation of defense response to bacterium|negative regulation of defense response to oomycetes|negative regulation of systemic acquired resistance|plant-type hypersensitive response|regulation of sal…	path:dct00240,path:dct01100	Pyrimidine metabolism|Metabolic pathways
circRNA_0167|NW_021318543.1:439823_447455_+	NW_021318543.1	+	439823	447455	7633	612	sense-overlapping	XM_020822521.2	NW_021318543.1:415495_485576_+	3083	110096520	LOC110096520	pantothenate kinase 2, transcript variant X1	GO:0005829,GO:0005634,GO:0005524,GO:0016787,GO:0046872,GO:0004594,GO:0015937	cytosol|nucleus|ATP binding|hydrolase activity|metal ion binding|pantothenate kinase activity|coenzyme A biosynthetic process	path:dct00770,path:dct01100	Pantothenate and CoA biosynthesis|Metabolic pathways
circRNA_0168|NW_021318543.1:440185_441026_+	NW_021318543.1	+	440185	441026	842	405	sense-overlapping	XM_020822521.2	NW_021318543.1:415495_485576_+	3083	110096520	LOC110096520	pantothenate kinase 2, transcript variant X1	GO:0005829,GO:0005634,GO:0005524,GO:0016787,GO:0046872,GO:0004594,GO:0015937	cytosol|nucleus|ATP binding|hydrolase activity|metal ion binding|pantothenate kinase activity|coenzyme A biosynthetic process	path:dct00770,path:dct01100	Pantothenate and CoA biosynthesis|Metabolic pathways
circRNA_0169|NW_021318543.1:500274_503141_-	NW_021318543.1	-	500274	503141	2868	423	sense-overlapping	XM_020822524.2	NW_021318543.1:485803_516257_-	2988	110096521	LOC110096521	phosphatidylinositol 3-kinase, root isoform, transcript variant X2	GO:0005737,GO:0005768,GO:0016020,GO:0005777,GO:0000407,GO:0034271,GO:0034272,GO:0016303,GO:0005524,GO:0000045,GO:0030242,GO:0006897,GO:0046854,GO:0036092,GO:0048015	cytoplasm|endosome|membrane|peroxisome|phagophore assembly site|phosphatidylinositol 3-kinase complex, class III, type I|phosphatidylinositol 3-kinase complex, class III, type II|1-phosphatidylinositol-3-kinase activity|ATP binding|autophagosome assembly|autophagy of peroxisome|endocytosis|phosphatidylinositol phosphorylation|phosphatidylinositol-3-phosphate biosynthetic process|phosphatidylinosi…	path:dct00562,path:dct01100,path:dct04070,path:dct04136,path:dct04145	Inositol phosphate metabolism|Metabolic pathways|Phosphatidylinositol signaling system|Autophagy - other|Phagosome
circRNA_0170|NW_021318543.1:505171_505661_-	NW_021318543.1	-	505171	505661	491	369	sense-overlapping	XM_020822524.2	NW_021318543.1:485803_516257_-	2988	110096521	LOC110096521	phosphatidylinositol 3-kinase, root isoform, transcript variant X2	GO:0005737,GO:0005768,GO:0016020,GO:0005777,GO:0000407,GO:0034271,GO:0034272,GO:0016303,GO:0005524,GO:0000045,GO:0030242,GO:0006897,GO:0046854,GO:0036092,GO:0048015	cytoplasm|endosome|membrane|peroxisome|phagophore assembly site|phosphatidylinositol 3-kinase complex, class III, type I|phosphatidylinositol 3-kinase complex, class III, type II|1-phosphatidylinositol-3-kinase activity|ATP binding|autophagosome assembly|autophagy of peroxisome|endocytosis|phosphatidylinositol phosphorylation|phosphatidylinositol-3-phosphate biosynthetic process|phosphatidylinosi…	path:dct00562,path:dct01100,path:dct04070,path:dct04136,path:dct04145	Inositol phosphate metabolism|Metabolic pathways|Phosphatidylinositol signaling system|Autophagy - other|Phagosome
circRNA_0171|NW_021318543.1:562755_574791_-	NW_021318543.1	-	562755	574791	12037	175	sense-overlapping	XM_028696571.1	NW_021318543.1:543110_613966_-	1368	110096499	LOC110096499	Golgi to ER traffic protein 4 homolog	-	-	-	-
circRNA_0172|NW_021318543.1:748448_757428_+	NW_021318543.1	+	748448	757428	8981	711	sense-overlapping	XM_020822534.2	NW_021318543.1:742705_757597_+	1137	110096527	LOC110096527	probable pinoresinol-lariciresinol reductase 3, transcript variant X1	GO:0010283,GO:1900057,GO:0033194	pinoresinol reductase activity|positive regulation of leaf senescence|response to hydroperoxide	-	-
circRNA_0173|NW_021318543.1:881838_882392_+	NW_021318543.1	+	881838	882392	555	420	sense-overlapping	XM_020821625.2	NW_021318543.1:869639_891851_+	2759	110095911	LOC110095911	UPF0261 protein y4oU	-	-	-	-
circRNA_0174|NW_021318543.1:888504_889649_+	NW_021318543.1	+	888504	889649	1146	681	sense-overlapping	XM_020821625.2	NW_021318543.1:869639_891851_+	2759	110095911	LOC110095911	UPF0261 protein y4oU	-	-	-	-
circRNA_0175|NW_021318544.1:589541_589971_+	NW_021318544.1	+	589541	589971	431	294	sense-overlapping	XM_020849952.2	NW_021318544.1:566800_607523_+	2372	110116408	LOC110116408	type I inositol polyphosphate 5-phosphatase 1, transcript variant X1	GO:0034485,GO:0004439,GO:0046856	phosphatidylinositol-3,4,5-trisphosphate 5-phosphatase activity|phosphatidylinositol-4,5-bisphosphate 5-phosphatase activity|phosphatidylinositol dephosphorylation	-	-
circRNA_0176|NW_021318547.1:24767_25840_+	NW_021318547.1	+	24767	25840	1074	960	sense-overlapping	XM_020819415.2	NW_021318547.1:3943_30480_+	3042	110094233	LOC110094233	tRNA (cytosine(34)-C(5))-methyltransferase	GO:0005737,GO:0005730,GO:0005654,GO:0005634,GO:0008168,GO:0016428,GO:0000049,GO:0070301,GO:0036346,GO:0019222,GO:0006417,GO:0030488,GO:0006400,GO:0002127	cytoplasm|nucleolus|nucleoplasm|nucleus|methyltransferase activity|tRNA (cytosine-5-)-methyltransferase activity|tRNA binding|cellular response to hydrogen peroxide|cellular response to L-cysteine|regulation of metabolic process|regulation of translation|tRNA methylation|tRNA modification|tRNA wobble base cytosine methylation	-	-
circRNA_0177|NW_021318547.1:493166_496655_+	NW_021318547.1	+	493166	496655	3490	513	sense-overlapping	XM_020819410.2	NW_021318547.1:473861_512516_+	1547	110094230	LOC110094230	CD2 antigen cytoplasmic tail-binding protein 2 homolog, transcript variant X2	-	-	-	-
circRNA_0178|NW_021318547.1:493228_493589_+	NW_021318547.1	+	493228	493589	362	279	sense-overlapping	XM_020819410.2	NW_021318547.1:473861_512516_+	1547	110094230	LOC110094230	CD2 antigen cytoplasmic tail-binding protein 2 homolog, transcript variant X2	-	-	-	-
circRNA_0179|NW_021318547.1:493228_496655_+	NW_021318547.1	+	493228	496655	3428	451	sense-overlapping	XM_020819410.2	NW_021318547.1:473861_512516_+	1547	110094230	LOC110094230	CD2 antigen cytoplasmic tail-binding protein 2 homolog, transcript variant X2	-	-	-	-
circRNA_0180|NW_021318547.1:493228_503325_+	NW_021318547.1	+	493228	503325	10098	665	sense-overlapping	XM_020819409.2	NW_021318547.1:473863_512516_+	1597	110094230	LOC110094230	CD2 antigen cytoplasmic tail-binding protein 2 homolog, transcript variant X1	-	-	-	-
circRNA_0181|NW_021318547.1:502983_503325_+	NW_021318547.1	+	502983	503325	343	214	sense-overlapping	XM_020819409.2	NW_021318547.1:473863_512516_+	1597	110094230	LOC110094230	CD2 antigen cytoplasmic tail-binding protein 2 homolog, transcript variant X1	-	-	-	-
circRNA_0182|NW_021318550.1:1051_1718_-	NW_021318550.1	-	1051	1718	668	510	sense-overlapping	XM_028696833.1	NW_021318550.1:1004_7531_-	978	110094598	LOC110094598	ABC transporter A family member 1-like	GO:0016021,GO:0043231,GO:0005774,GO:0005524,GO:0016887,GO:0042626,GO:0005319,GO:0006869	integral component of membrane|intracellular membrane-bounded organelle|vacuolar membrane|ATP binding|ATPase activity|ATPase-coupled transmembrane transporter activity|lipid transporter activity|lipid transport	-	-
circRNA_0183|NW_021318550.1:1051_7449_-	NW_021318550.1	-	1051	7449	6399	849	sense-overlapping	XM_028696833.1	NW_021318550.1:1004_7531_-	978	110094598	LOC110094598	ABC transporter A family member 1-like	GO:0016021,GO:0043231,GO:0005774,GO:0005524,GO:0016887,GO:0042626,GO:0005319,GO:0006869	integral component of membrane|intracellular membrane-bounded organelle|vacuolar membrane|ATP binding|ATPase activity|ATPase-coupled transmembrane transporter activity|lipid transporter activity|lipid transport	-	-
circRNA_0184|NW_021318550.1:6907_7449_-	NW_021318550.1	-	6907	7449	543	339	sense-overlapping	XM_028696833.1	NW_021318550.1:1004_7531_-	978	110094598	LOC110094598	ABC transporter A family member 1-like	GO:0016021,GO:0043231,GO:0005774,GO:0005524,GO:0016887,GO:0042626,GO:0005319,GO:0006869	integral component of membrane|intracellular membrane-bounded organelle|vacuolar membrane|ATP binding|ATPase activity|ATPase-coupled transmembrane transporter activity|lipid transporter activity|lipid transport	-	-
circRNA_0185|NW_021318553.1:115607_116303_+	NW_021318553.1	+	115607	116303	697	509	sense-overlapping	XM_020821809.2	NW_021318553.1:65003_138085_+	4318	110096047	LOC110096047	uncharacterized LOC110096047, transcript variant X1	GO:0005663,GO:0005634,GO:0005524,GO:0003677,GO:0003689,GO:0006281,GO:0006260,GO:0031935,GO:0051570,GO:0000712,GO:0009737	DNA replication factor C complex|nucleus|ATP binding|DNA binding|DNA clamp loader activity|DNA repair|DNA replication|regulation of chromatin silencing|regulation of histone H3-K9 methylation|resolution of meiotic recombination intermediates|response to abscisic acid	-	-
circRNA_0186|NW_021318553.1:295982_296461_+	NW_021318553.1	+	295982	296461	480	480	exonic	XM_020821799.2	NW_021318553.1:257683_392319_+	10170	110096041	LOC110096041	uncharacterized LOC110096041, transcript variant X1	-	-	-	-
circRNA_0187|NW_021318565.1:100633_101095_-	NW_021318565.1	-	100633	101095	463	311	sense-overlapping	XM_020820899.2	NW_021318565.1:93376_154870_-	2284	110095378	LOC110095378	uncharacterized LOC110095378, transcript variant X1	-	-	-	-
circRNA_0188|NW_021318565.1:270471_272039_-	NW_021318565.1	-	270471	272039	1569	568	sense-overlapping	XM_020820904.2	NW_021318565.1:267434_276734_-	3007	110095381	LOC110095381	linoleate 13S-lipoxygenase 2-1, chloroplastic	GO:0009570,GO:0009534,GO:0016165,GO:0046872,GO:0010597,GO:0031408	chloroplast stroma|chloroplast thylakoid|linoleate 13S-lipoxygenase activity|metal ion binding|green leaf volatile biosynthetic process|oxylipin biosynthetic process	path:dct00591,path:dct00592,path:dct01100,path:dct01110	Linoleic acid metabolism|alpha-Linolenic acid metabolism|Metabolic pathways|Biosynthesis of secondary metabolites
circRNA_0189|NW_021318566.1:352335_352958_-	NW_021318566.1	-	352335	352958	624	446	sense-overlapping	XM_020833487.2	NW_021318566.1:345375_359931_-	2637	110104403	LOC110104403	glyoxysomal fatty acid beta-oxidation multifunctional protein MFP-a, transcript variant X1	GO:0009514,GO:0018812,GO:0003857,GO:0008692,GO:0004165,GO:0004300,GO:0006635	glyoxysome|3-hydroxyacyl-CoA dehydratase activity|3-hydroxyacyl-CoA dehydrogenase activity|3-hydroxybutyryl-CoA epimerase activity|dodecenoyl-CoA delta-isomerase activity|enoyl-CoA hydratase activity|fatty acid beta-oxidation	path:dct00071,path:dct00592,path:dct01100,path:dct01110,path:dct01212	Fatty acid degradation|alpha-Linolenic acid metabolism|Metabolic pathways|Biosynthesis of secondary metabolites|Fatty acid metabolism
circRNA_0190|NW_021318566.1:379786_380895_+	NW_021318566.1	+	379786	380895	1110	232	sense-overlapping	XM_020833531.2	NW_021318566.1:368823_389269_+	894	110104426	LOC110104426	probable acylpyruvase FAHD1, mitochondrial	GO:0005829,GO:0005739,GO:0018773,GO:0047621,GO:0005507,GO:0016787	cytosol|mitochondrion|acetylpyruvate hydrolase activity|acylpyruvate hydrolase activity|copper ion binding|hydrolase activity	path:dct00350,path:dct01100	Tyrosine metabolism|Metabolic pathways
circRNA_0191|NW_021318566.1:447438_448009_+	NW_021318566.1	+	447438	448009	572	367	sense-overlapping	XM_020833533.2	NW_021318566.1:445650_449765_+	1774	110104428	LOC110104428	probable polygalacturonase	GO:0016021,GO:0004650,GO:0005975	integral component of membrane|polygalacturonase activity|carbohydrate metabolic process	-	-
circRNA_0192|NW_021318566.1:525139_526706_-	NW_021318566.1	-	525139	526706	1568	696	sense-overlapping	XM_020833500.2	NW_021318566.1:495981_532643_-	2399	110104408	LOC110104408	probable ion channel SYM8, transcript variant X4	GO:0016021,GO:0031965,GO:0042802,GO:0034220,GO:0009877	integral component of membrane|nuclear membrane|identical protein binding|ion transmembrane transport|nodulation	-	-
circRNA_0193|NW_021318569.1:158977_161412_-	NW_021318569.1	-	158977	161412	2436	522	sense-overlapping	XM_020822205.2	NW_021318569.1:157183_165512_-	1713	110096323	LOC110096323	probable sodium/metabolite cotransporter BASS2, chloroplastic, transcript variant X1	GO:0009941,GO:0016021,GO:0015293	chloroplast envelope|integral component of membrane|symporter activity	-	-
circRNA_0194|NW_021318569.1:269608_272642_-	NW_021318569.1	-	269608	272642	3035	966	sense-overlapping	XM_020822202.2	NW_021318569.1:242251_276074_-	4742	110096321	LOC110096321	ABC transporter G family member 31, transcript variant X1	GO:0016021,GO:0005886,GO:0005524,GO:0016887,GO:0042626,GO:0055085	integral component of membrane|plasma membrane|ATP binding|ATPase activity|ATPase-coupled transmembrane transporter activity|transmembrane transport	-	-
circRNA_0195|NW_021318569.1:364538_370482_-	NW_021318569.1	-	364538	370482	5945	927	sense-overlapping	XM_020822196.2	NW_021318569.1:357375_373241_-	1834	110096317	LOC110096317	polyadenylate-binding protein RBP45	GO:0005634,GO:0008143,GO:0006397	nucleus|poly(A) binding|mRNA processing	-	-
circRNA_0196|NW_021318575.1:160833_161069_-	NW_021318575.1	-	160833	161069	237	139	sense-overlapping	XM_020834227.2	NW_021318575.1:152156_180868_-	1190	110104926	LOC110104926	uncharacterized LOC110104926, transcript variant X2	-	-	-	-
circRNA_0197|NW_021318576.1:861561_861713_+	NW_021318576.1	+	861561	861713	153	153	exonic	XM_020819908.2	NW_021318576.1:825041_863029_+	4945	110094643	LOC110094643	paired amphipathic helix protein Sin3-like 4, transcript variant X1	GO:0000785,GO:0005634,GO:0003714,GO:0016575,GO:0000122,GO:0045892,GO:0009737	chromatin|nucleus|transcription corepressor activity|histone deacetylation|negative regulation of transcription by RNA polymerase II|negative regulation of transcription, DNA-templated|response to abscisic acid	-	-
circRNA_0198|NW_021318576.1:1894217_1895895_+	NW_021318576.1	+	1894217	1895895	1679	733	sense-overlapping	XM_020830365.2	NW_021318576.1:1884757_1905090_+	3099	110102168	LOC110102168	probable acyl-activating enzyme 18, peroxisomal, transcript variant X1	GO:0005777,GO:0016874,GO:0009850,GO:0006631	peroxisome|ligase activity|auxin metabolic process|fatty acid metabolic process	-	-
circRNA_0199|NW_021318576.1:1909990_1913694_+	NW_021318576.1	+	1909990	1913694	3705	326	sense-overlapping	XM_020830369.2	NW_021318576.1:1906158_1925060_+	1548	110102169	LOC110102169	serine/threonine-protein phosphatase PP2A catalytic subunit	GO:0005737,GO:0046872,GO:0004721	cytoplasm|metal ion binding|phosphoprotein phosphatase activity	path:dct03015,path:dct04136	mRNA surveillance pathway|Autophagy - other
circRNA_0200|NW_021318576.1:1909990_1919885_+	NW_021318576.1	+	1909990	1919885	9896	393	sense-overlapping	XM_020830369.2	NW_021318576.1:1906158_1925060_+	1548	110102169	LOC110102169	serine/threonine-protein phosphatase PP2A catalytic subunit	GO:0005737,GO:0046872,GO:0004721	cytoplasm|metal ion binding|phosphoprotein phosphatase activity	path:dct03015,path:dct04136	mRNA surveillance pathway|Autophagy - other
circRNA_0201|NW_021318576.1:1977315_1978967_-	NW_021318576.1	-	1977315	1978967	1653	321	sense-overlapping	XM_020830371.2	NW_021318576.1:1975142_1985532_-	2071	110102171	LOC110102171	uncharacterized LOC110102171	-	-	-	-
circRNA_0202|NW_021318580.1:824823_831319_+	NW_021318580.1	+	824823	831319	6497	636	sense-overlapping	XM_020838797.2	NW_021318580.1:771359_866000_+	2996	110108239	LOC110108239	V-type proton ATPase subunit a1, transcript variant X1	GO:0005623,GO:0005768,GO:0005794,GO:0016021,GO:0005802,GO:0012510,GO:0016471,GO:0000220,GO:0005773,GO:0051117,GO:0046961,GO:0070070,GO:0007035	cell|endosome|Golgi apparatus|integral component of membrane|trans-Golgi network|trans-Golgi network transport vesicle membrane|vacuolar proton-transporting V-type ATPase complex|vacuolar proton-transporting V-type ATPase, V0 domain|vacuole|ATPase binding|proton-transporting ATPase activity, rotational mechanism|proton-transporting V-type ATPase complex assembly|vacuolar acidification	path:dct00190,path:dct01100,path:dct04145	Oxidative phosphorylation|Metabolic pathways|Phagosome
circRNA_0203|NW_021318580.1:844551_844893_+	NW_021318580.1	+	844551	844893	343	254	sense-overlapping	XM_020838797.2	NW_021318580.1:771359_866000_+	2996	110108239	LOC110108239	V-type proton ATPase subunit a1, transcript variant X1	GO:0005623,GO:0005768,GO:0005794,GO:0016021,GO:0005802,GO:0012510,GO:0016471,GO:0000220,GO:0005773,GO:0051117,GO:0046961,GO:0070070,GO:0007035	cell|endosome|Golgi apparatus|integral component of membrane|trans-Golgi network|trans-Golgi network transport vesicle membrane|vacuolar proton-transporting V-type ATPase complex|vacuolar proton-transporting V-type ATPase, V0 domain|vacuole|ATPase binding|proton-transporting ATPase activity, rotational mechanism|proton-transporting V-type ATPase complex assembly|vacuolar acidification	path:dct00190,path:dct01100,path:dct04145	Oxidative phosphorylation|Metabolic pathways|Phagosome
circRNA_0204|NW_021318581.1:115849_123532_+	NW_021318581.1	+	115849	123532	7684	362	sense-overlapping	XM_028697938.1	NW_021318581.1:50145_159364_+	2899	110099352	LOC110099352	uncharacterized LOC110099352	-	-	-	-
circRNA_0205|NW_021318583.1:501059_527427_+	NW_021318583.1	+	501059	527427	26369	354	sense-overlapping	XM_028697983.1	NW_021318583.1:501058_532393_+	922	110103900	LOC110103900	ubinuclein-1	GO:0005730,GO:0005634,GO:0030875,GO:0034728,GO:0060968,GO:0009651	nucleolus|nucleus|rDNA protrusion|nucleosome organization|regulation of gene silencing|response to salt stress	-	-
circRNA_0206|NW_021318583.1:526991_527427_+	NW_021318583.1	+	526991	527427	437	267	sense-overlapping	XM_028697983.1	NW_021318583.1:501058_532393_+	922	110103900	LOC110103900	ubinuclein-1	GO:0005730,GO:0005634,GO:0030875,GO:0034728,GO:0060968,GO:0009651	nucleolus|nucleus|rDNA protrusion|nucleosome organization|regulation of gene silencing|response to salt stress	-	-
circRNA_0207|NW_021318585.1:269461_270622_+	NW_021318585.1	+	269461	270622	1162	400	sense-overlapping	XM_020831131.2	NW_021318585.1:266768_300956_+	2321	110102690	LOC110102690	dihydrolipoyl dehydrogenase 2, chloroplastic	GO:0005623,GO:0009941,GO:0009570,GO:0005829,GO:0005730,GO:0004148,GO:0050660,GO:0006086,GO:0045454,GO:0046685	cell|chloroplast envelope|chloroplast stroma|cytosol|nucleolus|dihydrolipoyl dehydrogenase activity|flavin adenine dinucleotide binding|acetyl-CoA biosynthetic process from pyruvate|cell redox homeostasis|response to arsenic-containing substance	path:dct00010,path:dct00020,path:dct00260,path:dct00280,path:dct00310,path:dct00380,path:dct00620,path:dct00630,path:dct00640,path:dct01100,path:dct01110,path:dct01200	Glycolysis / Gluconeogenesis|Citrate cycle (TCA cycle)|Glycine, serine and threonine metabolism|Valine, leucine and isoleucine degradation|Lysine degradation|Tryptophan metabolism|Pyruvate metabolism|Glyoxylate and dicarboxylate metabolism|Propanoate metabolism|Metabolic pathways|Biosynthesis of secondary metabolites|Carbon metabolism
circRNA_0208|NW_021318585.1:285548_298931_+	NW_021318585.1	+	285548	298931	13384	825	sense-overlapping	XM_020831131.2	NW_021318585.1:266768_300956_+	2321	110102690	LOC110102690	dihydrolipoyl dehydrogenase 2, chloroplastic	GO:0005623,GO:0009941,GO:0009570,GO:0005829,GO:0005730,GO:0004148,GO:0050660,GO:0006086,GO:0045454,GO:0046685	cell|chloroplast envelope|chloroplast stroma|cytosol|nucleolus|dihydrolipoyl dehydrogenase activity|flavin adenine dinucleotide binding|acetyl-CoA biosynthetic process from pyruvate|cell redox homeostasis|response to arsenic-containing substance	path:dct00010,path:dct00020,path:dct00260,path:dct00280,path:dct00310,path:dct00380,path:dct00620,path:dct00630,path:dct00640,path:dct01100,path:dct01110,path:dct01200	Glycolysis / Gluconeogenesis|Citrate cycle (TCA cycle)|Glycine, serine and threonine metabolism|Valine, leucine and isoleucine degradation|Lysine degradation|Tryptophan metabolism|Pyruvate metabolism|Glyoxylate and dicarboxylate metabolism|Propanoate metabolism|Metabolic pathways|Biosynthesis of secondary metabolites|Carbon metabolism
circRNA_0209|NW_021318585.1:290035_290694_+	NW_021318585.1	+	290035	290694	660	318	sense-overlapping	XM_020831131.2	NW_021318585.1:266768_300956_+	2321	110102690	LOC110102690	dihydrolipoyl dehydrogenase 2, chloroplastic	GO:0005623,GO:0009941,GO:0009570,GO:0005829,GO:0005730,GO:0004148,GO:0050660,GO:0006086,GO:0045454,GO:0046685	cell|chloroplast envelope|chloroplast stroma|cytosol|nucleolus|dihydrolipoyl dehydrogenase activity|flavin adenine dinucleotide binding|acetyl-CoA biosynthetic process from pyruvate|cell redox homeostasis|response to arsenic-containing substance	path:dct00010,path:dct00020,path:dct00260,path:dct00280,path:dct00310,path:dct00380,path:dct00620,path:dct00630,path:dct00640,path:dct01100,path:dct01110,path:dct01200	Glycolysis / Gluconeogenesis|Citrate cycle (TCA cycle)|Glycine, serine and threonine metabolism|Valine, leucine and isoleucine degradation|Lysine degradation|Tryptophan metabolism|Pyruvate metabolism|Glyoxylate and dicarboxylate metabolism|Propanoate metabolism|Metabolic pathways|Biosynthesis of secondary metabolites|Carbon metabolism
circRNA_0210|NW_021318585.1:297726_298931_+	NW_021318585.1	+	297726	298931	1206	300	sense-overlapping	XM_020831131.2	NW_021318585.1:266768_300956_+	2321	110102690	LOC110102690	dihydrolipoyl dehydrogenase 2, chloroplastic	GO:0005623,GO:0009941,GO:0009570,GO:0005829,GO:0005730,GO:0004148,GO:0050660,GO:0006086,GO:0045454,GO:0046685	cell|chloroplast envelope|chloroplast stroma|cytosol|nucleolus|dihydrolipoyl dehydrogenase activity|flavin adenine dinucleotide binding|acetyl-CoA biosynthetic process from pyruvate|cell redox homeostasis|response to arsenic-containing substance	path:dct00010,path:dct00020,path:dct00260,path:dct00280,path:dct00310,path:dct00380,path:dct00620,path:dct00630,path:dct00640,path:dct01100,path:dct01110,path:dct01200	Glycolysis / Gluconeogenesis|Citrate cycle (TCA cycle)|Glycine, serine and threonine metabolism|Valine, leucine and isoleucine degradation|Lysine degradation|Tryptophan metabolism|Pyruvate metabolism|Glyoxylate and dicarboxylate metabolism|Propanoate metabolism|Metabolic pathways|Biosynthesis of secondary metabolites|Carbon metabolism
circRNA_0211|NW_021318585.1:756517_757871_-	NW_021318585.1	-	756517	757871	1355	625	sense-overlapping	XM_028698040.1	NW_021318585.1:755336_768497_-	1944	110102683	LOC110102683	cyclin-dependent kinase C-2-like	GO:0000307,GO:0000790,GO:0005634,GO:0005524,GO:0004693,GO:0008353,GO:0070816,GO:0032968,GO:0006468	cyclin-dependent protein kinase holoenzyme complex|nuclear chromatin|nucleus|ATP binding|cyclin-dependent protein serine/threonine kinase activity|RNA polymerase II CTD heptapeptide repeat kinase activity|phosphorylation of RNA polymerase II C-terminal domain|positive regulation of transcription elongation from RNA polymerase II promoter|protein phosphorylation	-	-
circRNA_0212|NW_021318585.1:844467_851214_-	NW_021318585.1	-	844467	851214	6748	423	sense-overlapping	XM_028698086.1	NW_021318585.1:812685_905830_-	3638	110098418	LOC110098418	inositol hexakisphosphate and diphosphoinositol-pentakisphosphate kinase VIP2, transcript variant X1	GO:0005829,GO:0005886,GO:0009536,GO:0102092,GO:0005524,GO:0033857,GO:0000829,GO:0052723,GO:0052724,GO:0000832,GO:0000828,GO:0006020,GO:0032958,GO:1904966	cytosol|plasma membrane|plastid|5-diphosphoinositol pentakisphosphate 3-kinase activity|ATP binding|diphosphoinositol-pentakisphosphate kinase activity|inositol heptakisphosphate kinase activity|inositol hexakisphosphate 1-kinase activity|inositol hexakisphosphate 3-kinase activity|inositol hexakisphosphate 5-kinase activity|inositol hexakisphosphate kinase activity|inositol metabolic process|ino…	path:dct04070	Phosphatidylinositol signaling system
circRNA_0213|NW_021318585.1:844467_855824_-	NW_021318585.1	-	844467	855824	11358	505	sense-overlapping	XM_028698086.1	NW_021318585.1:812685_905830_-	3638	110098418	LOC110098418	inositol hexakisphosphate and diphosphoinositol-pentakisphosphate kinase VIP2, transcript variant X1	GO:0005829,GO:0005886,GO:0009536,GO:0102092,GO:0005524,GO:0033857,GO:0000829,GO:0052723,GO:0052724,GO:0000832,GO:0000828,GO:0006020,GO:0032958,GO:1904966	cytosol|plasma membrane|plastid|5-diphosphoinositol pentakisphosphate 3-kinase activity|ATP binding|diphosphoinositol-pentakisphosphate kinase activity|inositol heptakisphosphate kinase activity|inositol hexakisphosphate 1-kinase activity|inositol hexakisphosphate 3-kinase activity|inositol hexakisphosphate 5-kinase activity|inositol hexakisphosphate kinase activity|inositol metabolic process|ino…	path:dct04070	Phosphatidylinositol signaling system
circRNA_0214|NW_021318585.1:850024_855824_-	NW_021318585.1	-	850024	855824	5801	284	sense-overlapping	XM_028698086.1	NW_021318585.1:812685_905830_-	3638	110098418	LOC110098418	inositol hexakisphosphate and diphosphoinositol-pentakisphosphate kinase VIP2, transcript variant X1	GO:0005829,GO:0005886,GO:0009536,GO:0102092,GO:0005524,GO:0033857,GO:0000829,GO:0052723,GO:0052724,GO:0000832,GO:0000828,GO:0006020,GO:0032958,GO:1904966	cytosol|plasma membrane|plastid|5-diphosphoinositol pentakisphosphate 3-kinase activity|ATP binding|diphosphoinositol-pentakisphosphate kinase activity|inositol heptakisphosphate kinase activity|inositol hexakisphosphate 1-kinase activity|inositol hexakisphosphate 3-kinase activity|inositol hexakisphosphate 5-kinase activity|inositol hexakisphosphate kinase activity|inositol metabolic process|ino…	path:dct04070	Phosphatidylinositol signaling system
circRNA_0215|NW_021318585.1:850024_855860_-	NW_021318585.1	-	850024	855860	5837	320	sense-overlapping	XM_028698086.1	NW_021318585.1:812685_905830_-	3638	110098418	LOC110098418	inositol hexakisphosphate and diphosphoinositol-pentakisphosphate kinase VIP2, transcript variant X1	GO:0005829,GO:0005886,GO:0009536,GO:0102092,GO:0005524,GO:0033857,GO:0000829,GO:0052723,GO:0052724,GO:0000832,GO:0000828,GO:0006020,GO:0032958,GO:1904966	cytosol|plasma membrane|plastid|5-diphosphoinositol pentakisphosphate 3-kinase activity|ATP binding|diphosphoinositol-pentakisphosphate kinase activity|inositol heptakisphosphate kinase activity|inositol hexakisphosphate 1-kinase activity|inositol hexakisphosphate 3-kinase activity|inositol hexakisphosphate 5-kinase activity|inositol hexakisphosphate kinase activity|inositol metabolic process|ino…	path:dct04070	Phosphatidylinositol signaling system
circRNA_0216|NW_021318585.1:862313_863122_-	NW_021318585.1	-	862313	863122	810	464	sense-overlapping	XM_028698086.1	NW_021318585.1:812685_905830_-	3638	110098418	LOC110098418	inositol hexakisphosphate and diphosphoinositol-pentakisphosphate kinase VIP2, transcript variant X1	GO:0005829,GO:0005886,GO:0009536,GO:0102092,GO:0005524,GO:0033857,GO:0000829,GO:0052723,GO:0052724,GO:0000832,GO:0000828,GO:0006020,GO:0032958,GO:1904966	cytosol|plasma membrane|plastid|5-diphosphoinositol pentakisphosphate 3-kinase activity|ATP binding|diphosphoinositol-pentakisphosphate kinase activity|inositol heptakisphosphate kinase activity|inositol hexakisphosphate 1-kinase activity|inositol hexakisphosphate 3-kinase activity|inositol hexakisphosphate 5-kinase activity|inositol hexakisphosphate kinase activity|inositol metabolic process|ino…	path:dct04070	Phosphatidylinositol signaling system
circRNA_0217|NW_021318585.1:885556_898740_-	NW_021318585.1	-	885556	898740	13185	394	sense-overlapping	XM_028698086.1	NW_021318585.1:812685_905830_-	3638	110098418	LOC110098418	inositol hexakisphosphate and diphosphoinositol-pentakisphosphate kinase VIP2, transcript variant X1	GO:0005829,GO:0005886,GO:0009536,GO:0102092,GO:0005524,GO:0033857,GO:0000829,GO:0052723,GO:0052724,GO:0000832,GO:0000828,GO:0006020,GO:0032958,GO:1904966	cytosol|plasma membrane|plastid|5-diphosphoinositol pentakisphosphate 3-kinase activity|ATP binding|diphosphoinositol-pentakisphosphate kinase activity|inositol heptakisphosphate kinase activity|inositol hexakisphosphate 1-kinase activity|inositol hexakisphosphate 3-kinase activity|inositol hexakisphosphate 5-kinase activity|inositol hexakisphosphate kinase activity|inositol metabolic process|ino…	path:dct04070	Phosphatidylinositol signaling system
circRNA_0218|NW_021318585.1:921014_921522_+	NW_021318585.1	+	921014	921522	509	294	sense-overlapping	XM_020825253.2	NW_021318585.1:914706_941846_+	3362	110098419	LOC110098419	RNA-binding protein 28, transcript variant X1	GO:0005730,GO:0005634,GO:1990904,GO:0003729,GO:0003723,GO:0006397,GO:0006364	nucleolus|nucleus|ribonucleoprotein complex|mRNA binding|RNA binding|mRNA processing|rRNA processing	path:dct03008	Ribosome biogenesis in eukaryotes
circRNA_0219|NW_021318585.1:1006830_1008744_-	NW_021318585.1	-	1006830	1008744	1915	555	sense-overlapping	XM_028698113.1	NW_021318585.1:1004734_1014094_-	1290	110098438	LOC110098438	ultraviolet-B receptor UVR8, transcript variant X4	GO:0000785,GO:0005829,GO:0005634,GO:0009536,GO:0003682,GO:0005085,GO:0042802,GO:0009881,GO:0042803,GO:0009649,GO:0018298,GO:0009411,GO:0010224	chromatin|cytosol|nucleus|plastid|chromatin binding|guanyl-nucleotide exchange factor activity|identical protein binding|photoreceptor activity|protein homodimerization activity|entrainment of circadian clock|protein-chromophore linkage|response to UV|response to UV-B	-	-
circRNA_0220|NW_021318585.1:1600538_1601229_+	NW_021318585.1	+	1600538	1601229	692	248	sense-overlapping	XM_020825266.2	NW_021318585.1:1597117_1651191_+	1912	110098431	LOC110098431	succinate-semialdehyde dehydrogenase, mitochondrial	GO:0005759,GO:0004777,GO:0009013,GO:0009450	mitochondrial matrix|succinate-semialdehyde dehydrogenase (NAD+) activity|succinate-semialdehyde dehydrogenase [NAD(P)+] activity|gamma-aminobutyric acid catabolic process	path:dct00250,path:dct00650,path:dct01100	Alanine, aspartate and glutamate metabolism|Butanoate metabolism|Metabolic pathways
circRNA_0221|NW_021318585.1:1702859_1703183_+	NW_021318585.1	+	1702859	1703183	325	241	sense-overlapping	XM_028698258.1	NW_021318585.1:1687647_1704250_+	1335	110098429	LOC110098429	protein PLASTID TRANSCRIPTIONALLY ACTIVE 14, transcript variant X1	GO:0042644,GO:0009534,GO:0009508,GO:0000427,GO:0016279,GO:0009658,GO:0018026,GO:0042793,GO:0009416,GO:0010027	chloroplast nucleoid|chloroplast thylakoid|plastid chromosome|plastid-encoded plastid RNA polymerase complex|protein-lysine N-methyltransferase activity|chloroplast organization|peptidyl-lysine monomethylation|plastid transcription|response to light stimulus|thylakoid membrane organization	-	-
circRNA_0222|NW_021318585.1:2011232_2011938_-	NW_021318585.1	-	2011232	2011938	707	560	sense-overlapping	XM_020826765.2	NW_021318585.1:1994931_2026472_-	2130	110099570	LOC110099570	uncharacterized LOC110099570, transcript variant X1	GO:0005886,GO:0009738,GO:1900458	plasma membrane|abscisic acid-activated signaling pathway|negative regulation of brassinosteroid mediated signaling pathway	-	-
circRNA_0223|NW_021318585.1:2072484_2072771_+	NW_021318585.1	+	2072484	2072771	288	288	exonic	XM_020826762.2	NW_021318585.1:2072262_2107954_+	1624	110099568	LOC110099568	uncharacterized protein At2g24330-like	GO:0005783,GO:0071782,GO:0071784,GO:0071786	endoplasmic reticulum|endoplasmic reticulum tubular network|endoplasmic reticulum cisternal network assembly|endoplasmic reticulum tubular network organization	-	-
circRNA_0224|NW_021318585.1:2072511_2072771_+	NW_021318585.1	+	2072511	2072771	261	261	exonic	XM_020826762.2	NW_021318585.1:2072262_2107954_+	1624	110099568	LOC110099568	uncharacterized protein At2g24330-like	GO:0005783,GO:0071782,GO:0071784,GO:0071786	endoplasmic reticulum|endoplasmic reticulum tubular network|endoplasmic reticulum cisternal network assembly|endoplasmic reticulum tubular network organization	-	-
circRNA_0225|NW_021318586.1:131509_132576_+	NW_021318586.1	+	131509	132576	1068	531	sense-overlapping	XM_028698372.1	NW_021318586.1:128271_146201_+	1299	110098591	LOC110098591	RNA polymerase II-associated protein 3, transcript variant X3	GO:0009507,GO:0009941,GO:0005829,GO:0031359,GO:0009536,GO:0015031	chloroplast|chloroplast envelope|cytosol|integral component of chloroplast outer membrane|plastid|protein transport	-	-
circRNA_0226|NW_021318586.1:132268_132576_+	NW_021318586.1	+	132268	132576	309	205	sense-overlapping	XM_028698372.1	NW_021318586.1:128271_146201_+	1299	110098591	LOC110098591	RNA polymerase II-associated protein 3, transcript variant X3	GO:0009507,GO:0009941,GO:0005829,GO:0031359,GO:0009536,GO:0015031	chloroplast|chloroplast envelope|cytosol|integral component of chloroplast outer membrane|plastid|protein transport	-	-
circRNA_0227|NW_021318586.1:140876_141441_+	NW_021318586.1	+	140876	141441	566	379	sense-overlapping	XM_028698372.1	NW_021318586.1:128271_146201_+	1299	110098591	LOC110098591	RNA polymerase II-associated protein 3, transcript variant X3	GO:0009507,GO:0009941,GO:0005829,GO:0031359,GO:0009536,GO:0015031	chloroplast|chloroplast envelope|cytosol|integral component of chloroplast outer membrane|plastid|protein transport	-	-
circRNA_0228|NW_021318586.1:196828_197188_-	NW_021318586.1	-	196828	197188	361	259	sense-overlapping	XM_020825496.2	NW_021318586.1:182102_205558_-	1237	110098617	LOC110098617	ATP-dependent Clp protease proteolytic subunit-related protein 2, chloroplastic, transcript variant X1	GO:0009507,GO:0009941,GO:0009570,GO:0009534,GO:0009840,GO:0009368,GO:0005576,GO:0010287,GO:0004176,GO:0051117,GO:0004252,GO:0009658,GO:0006515	chloroplast|chloroplast envelope|chloroplast stroma|chloroplast thylakoid|chloroplastic endopeptidase Clp complex|endopeptidase Clp complex|extracellular region|plastoglobule|ATP-dependent peptidase activity|ATPase binding|serine-type endopeptidase activity|chloroplast organization|protein quality control for misfolded or incompletely synthesized proteins	-	-
circRNA_0229|NW_021318586.1:216684_217813_-	NW_021318586.1	-	216684	217813	1130	590	sense-overlapping	XM_020825471.2	NW_021318586.1:209171_238283_-	2508	110098599	LOC110098599	2,4-dichlorophenol 6-monooxygenase	GO:0071949,GO:0004497	FAD binding|monooxygenase activity	-	-
circRNA_0230|NW_021318586.1:401924_403308_+	NW_021318586.1	+	401924	403308	1385	372	sense-overlapping	XM_028698430.1	NW_021318586.1:367995_408424_+	2425	110098601	LOC110098601	histone-lysine N-methyltransferase EZ3, transcript variant X2	GO:0005677,GO:0031519,GO:0018024,GO:0030154,GO:0006342,GO:0009908,GO:0070734,GO:0048587	chromatin silencing complex|PcG protein complex|histone-lysine N-methyltransferase activity|cell differentiation|chromatin silencing|flower development|histone H3-K27 methylation|regulation of short-day photoperiodism, flowering	-	-
circRNA_0231|NW_021318586.1:403551_413014_+	NW_021318586.1	+	403551	413014	9464	478	sense-overlapping	XM_020825474.2	NW_021318586.1:367995_419181_+	3487	110098601	LOC110098601	histone-lysine N-methyltransferase EZ3, transcript variant X1	GO:0005677,GO:0031519,GO:0018024,GO:0030154,GO:0006342,GO:0009908,GO:0070734,GO:0048587	chromatin silencing complex|PcG protein complex|histone-lysine N-methyltransferase activity|cell differentiation|chromatin silencing|flower development|histone H3-K27 methylation|regulation of short-day photoperiodism, flowering	-	-
circRNA_0232|NW_021318586.1:645413_645937_-	NW_021318586.1	-	645413	645937	525	244	sense-overlapping	XM_020825498.2	NW_021318586.1:639552_650037_-	1056	110098618	LOC110098618	nucleoside diphosphate kinase	GO:0009507,GO:0005524,GO:0046872,GO:0004550,GO:0006241,GO:0006183,GO:0006163,GO:0006220,GO:0006228	chloroplast|ATP binding|metal ion binding|nucleoside diphosphate kinase activity|CTP biosynthetic process|GTP biosynthetic process|purine nucleotide metabolic process|pyrimidine nucleotide metabolic process|UTP biosynthetic process	path:dct00230,path:dct00240,path:dct01100,path:dct01110,path:dct04016	Purine metabolism|Pyrimidine metabolism|Metabolic pathways|Biosynthesis of secondary metabolites|MAPK signaling pathway - plant
circRNA_0233|NW_021318586.1:681737_682346_+	NW_021318586.1	+	681737	682346	610	312	sense-overlapping	XM_020825481.2	NW_021318586.1:656600_694937_+	2082	110098604	LOC110098604	protein PLASTID TRANSCRIPTIONALLY ACTIVE 10	GO:0009507,GO:0042644,GO:0009570,GO:0005829,GO:0009508,GO:0003676	chloroplast|chloroplast nucleoid|chloroplast stroma|cytosol|plastid chromosome|nucleic acid binding	-	-
circRNA_0234|NW_021318586.1:702240_703192_-	NW_021318586.1	-	702240	703192	953	345	sense-overlapping	XM_020825475.2	NW_021318586.1:702133_710082_-	1757	110098602	LOC110098602	2-isopropylmalate synthase A	GO:0003852,GO:0009098	2-isopropylmalate synthase activity|leucine biosynthetic process	path:dct00290,path:dct00620,path:dct01100,path:dct01110,path:dct01210,path:dct01230	Valine, leucine and isoleucine biosynthesis|Pyruvate metabolism|Metabolic pathways|Biosynthesis of secondary metabolites|2-Oxocarboxylic acid metabolism|Biosynthesis of amino acids
circRNA_0235|NW_021318586.1:704042_719314_-	NW_021318586.1	-	704042	719314	15273	10537	sense-overlapping	XM_020825475.2	NW_021318586.1:702133_710082_-	1757	110098602	LOC110098602	2-isopropylmalate synthase A	GO:0003852,GO:0009098	2-isopropylmalate synthase activity|leucine biosynthetic process	path:dct00290,path:dct00620,path:dct01100,path:dct01110,path:dct01210,path:dct01230	Valine, leucine and isoleucine biosynthesis|Pyruvate metabolism|Metabolic pathways|Biosynthesis of secondary metabolites|2-Oxocarboxylic acid metabolism|Biosynthesis of amino acids
circRNA_0236|NW_021318586.1:706334_723204_-	NW_021318586.1	-	706334	723204	16871	13192	sense-overlapping	XM_028698297.1	NW_021318586.1:718734_725456_-	1581	114580508	LOC114580508	2-isopropylmalate synthase A-like, transcript variant X3	GO:0003852,GO:0009098	2-isopropylmalate synthase activity|leucine biosynthetic process	path:dct00290,path:dct00620,path:dct01100,path:dct01110,path:dct01210,path:dct01230	Valine, leucine and isoleucine biosynthesis|Pyruvate metabolism|Metabolic pathways|Biosynthesis of secondary metabolites|2-Oxocarboxylic acid metabolism|Biosynthesis of amino acids
circRNA_0237|NW_021318586.1:813232_816225_-	NW_021318586.1	-	813232	816225	2994	438	sense-overlapping	XM_028698330.1	NW_021318586.1:773874_872906_-	4944	110098611	LOC110098611	uncharacterized LOC110098611	GO:0005737,GO:0004190,GO:0003677,GO:0003887,GO:0004519,GO:0046872,GO:0003723,GO:0003964,GO:0015074,GO:0006310	cytoplasm|aspartic-type endopeptidase activity|DNA binding|DNA-directed DNA polymerase activity|endonuclease activity|metal ion binding|RNA binding|RNA-directed DNA polymerase activity|DNA integration|DNA recombination	-	-
circRNA_0238|NW_021318590.1:572084_573142_-	NW_021318590.1	-	572084	573142	1059	476	sense-overlapping	XM_020838228.2	NW_021318590.1:570128_580950_-	1419	110107828	LOC110107828	shikimate kinase 3, chloroplastic, transcript variant X1	GO:0009507,GO:0009536,GO:0005524,GO:0000287,GO:0004765,GO:0009073,GO:0009423,GO:0019632	chloroplast|plastid|ATP binding|magnesium ion binding|shikimate kinase activity|aromatic amino acid family biosynthetic process|chorismate biosynthetic process|shikimate metabolic process	path:dct00400,path:dct01100,path:dct01110,path:dct01230	Phenylalanine, tyrosine and tryptophan biosynthesis|Metabolic pathways|Biosynthesis of secondary metabolites|Biosynthesis of amino acids
circRNA_0239|NW_021318592.1:347104_388542_+	NW_021318592.1	+	347104	388542	41439	641	sense-overlapping	XM_020830571.2	NW_021318592.1:340025_400640_+	1962	110102294	LOC110102294	SMR domain-containing protein At5g58720	-	-	-	-
circRNA_0240|NW_021318592.1:388312_388542_+	NW_021318592.1	+	388312	388542	231	134	sense-overlapping	XM_020830571.2	NW_021318592.1:340025_400640_+	1962	110102294	LOC110102294	SMR domain-containing protein At5g58720	-	-	-	-
circRNA_0241|NW_021318592.1:493173_494538_-	NW_021318592.1	-	493173	494538	1366	327	sense-overlapping	XM_020830563.2	NW_021318592.1:489270_507469_-	4649	110102290	LOC110102290	uncharacterized LOC110102290	-	-	-	-
circRNA_0242|NW_021318594.1:86408_102642_-	NW_021318594.1	-	86408	102642	16235	337	sense-overlapping	XM_020830410.2	NW_021318594.1:9485_137123_-	3476	110102194	LOC110102194	glycine--tRNA ligase, chloroplastic/mitochondrial 2	GO:0009507,GO:0009570,GO:0005739,GO:0005524,GO:0004820,GO:0046983,GO:0009793,GO:0006426,GO:0045995	chloroplast|chloroplast stroma|mitochondrion|ATP binding|glycine-tRNA ligase activity|protein dimerization activity|embryo development ending in seed dormancy|glycyl-tRNA aminoacylation|regulation of embryonic development	path:dct00970	Aminoacyl-tRNA biosynthesis
circRNA_0243|NW_021318594.1:100966_102642_-	NW_021318594.1	-	100966	102642	1677	273	sense-overlapping	XM_020830410.2	NW_021318594.1:9485_137123_-	3476	110102194	LOC110102194	glycine--tRNA ligase, chloroplastic/mitochondrial 2	GO:0009507,GO:0009570,GO:0005739,GO:0005524,GO:0004820,GO:0046983,GO:0009793,GO:0006426,GO:0045995	chloroplast|chloroplast stroma|mitochondrion|ATP binding|glycine-tRNA ligase activity|protein dimerization activity|embryo development ending in seed dormancy|glycyl-tRNA aminoacylation|regulation of embryonic development	path:dct00970	Aminoacyl-tRNA biosynthesis
circRNA_0244|NW_021318594.1:100966_102645_-	NW_021318594.1	-	100966	102645	1680	276	sense-overlapping	XM_020830410.2	NW_021318594.1:9485_137123_-	3476	110102194	LOC110102194	glycine--tRNA ligase, chloroplastic/mitochondrial 2	GO:0009507,GO:0009570,GO:0005739,GO:0005524,GO:0004820,GO:0046983,GO:0009793,GO:0006426,GO:0045995	chloroplast|chloroplast stroma|mitochondrion|ATP binding|glycine-tRNA ligase activity|protein dimerization activity|embryo development ending in seed dormancy|glycyl-tRNA aminoacylation|regulation of embryonic development	path:dct00970	Aminoacyl-tRNA biosynthesis
circRNA_0245|NW_021318594.1:107265_107582_-	NW_021318594.1	-	107265	107582	318	219	sense-overlapping	XM_020830410.2	NW_021318594.1:9485_137123_-	3476	110102194	LOC110102194	glycine--tRNA ligase, chloroplastic/mitochondrial 2	GO:0009507,GO:0009570,GO:0005739,GO:0005524,GO:0004820,GO:0046983,GO:0009793,GO:0006426,GO:0045995	chloroplast|chloroplast stroma|mitochondrion|ATP binding|glycine-tRNA ligase activity|protein dimerization activity|embryo development ending in seed dormancy|glycyl-tRNA aminoacylation|regulation of embryonic development	path:dct00970	Aminoacyl-tRNA biosynthesis
circRNA_0246|NW_021318594.1:122930_123156_-	NW_021318594.1	-	122930	123156	227	146	sense-overlapping	XM_020830410.2	NW_021318594.1:9485_137123_-	3476	110102194	LOC110102194	glycine--tRNA ligase, chloroplastic/mitochondrial 2	GO:0009507,GO:0009570,GO:0005739,GO:0005524,GO:0004820,GO:0046983,GO:0009793,GO:0006426,GO:0045995	chloroplast|chloroplast stroma|mitochondrion|ATP binding|glycine-tRNA ligase activity|protein dimerization activity|embryo development ending in seed dormancy|glycyl-tRNA aminoacylation|regulation of embryonic development	path:dct00970	Aminoacyl-tRNA biosynthesis
circRNA_0247|NW_021318595.1:99176_99773_-	NW_021318595.1	-	99176	99773	598	286	sense-overlapping	XM_020816218.2	NW_021318595.1:90912_104416_-	2592	110091914	LOC110091914	peroxisomal fatty acid beta-oxidation multifunctional protein, transcript variant X1	GO:0005618,GO:0005874,GO:0005777,GO:0009506,GO:0018812,GO:0003857,GO:0008692,GO:0004165,GO:0004300,GO:0008017,GO:0003729,GO:0006635,GO:0009908,GO:0009695	cell wall|microtubule|peroxisome|plasmodesma|3-hydroxyacyl-CoA dehydratase activity|3-hydroxyacyl-CoA dehydrogenase activity|3-hydroxybutyryl-CoA epimerase activity|dodecenoyl-CoA delta-isomerase activity|enoyl-CoA hydratase activity|microtubule binding|mRNA binding|fatty acid beta-oxidation|flower development|jasmonic acid biosynthetic process	path:dct00071,path:dct00592,path:dct01100,path:dct01110,path:dct01212	Fatty acid degradation|alpha-Linolenic acid metabolism|Metabolic pathways|Biosynthesis of secondary metabolites|Fatty acid metabolism
circRNA_0248|NW_021318595.1:213031_213580_-	NW_021318595.1	-	213031	213580	550	357	sense-overlapping	XM_020816215.2	NW_021318595.1:199225_220980_-	2082	110091911	LOC110091911	uncharacterized LOC110091911	-	-	-	-
circRNA_0249|NW_021318595.1:238558_239693_-	NW_021318595.1	-	238558	239693	1136	1136	intergenic
circRNA_0250|NW_021318595.1:455075_472654_-	NW_021318595.1	-	455075	472654	17580	545	sense-overlapping	XM_020821757.2	NW_021318595.1:453002_508208_-	2476	110096014	LOC110096014	peptidyl-prolyl cis-trans isomerase CYP59	GO:0005829,GO:0005634,GO:0003755,GO:0003723,GO:0008270,GO:1901407	cytosol|nucleus|peptidyl-prolyl cis-trans isomerase activity|RNA binding|zinc ion binding|regulation of phosphorylation of RNA polymerase II C-terminal domain	-	-
circRNA_0251|NW_021318595.1:459131_472654_-	NW_021318595.1	-	459131	472654	13524	442	sense-overlapping	XM_020821757.2	NW_021318595.1:453002_508208_-	2476	110096014	LOC110096014	peptidyl-prolyl cis-trans isomerase CYP59	GO:0005829,GO:0005634,GO:0003755,GO:0003723,GO:0008270,GO:1901407	cytosol|nucleus|peptidyl-prolyl cis-trans isomerase activity|RNA binding|zinc ion binding|regulation of phosphorylation of RNA polymerase II C-terminal domain	-	-
circRNA_0252|NW_021318595.1:597604_597977_-	NW_021318595.1	-	597604	597977	374	262	sense-overlapping	XM_020821750.2	NW_021318595.1:585845_614391_-	1410	110096009	LOC110096009	uncharacterized LOC110096009, transcript variant X2	-	-	-	-
circRNA_0253|NW_021318595.1:597604_598013_-	NW_021318595.1	-	597604	598013	410	298	sense-overlapping	XM_020821750.2	NW_021318595.1:585845_614391_-	1410	110096009	LOC110096009	uncharacterized LOC110096009, transcript variant X2	-	-	-	-
circRNA_0254|NW_021318595.1:1074635_1075058_-	NW_021318595.1	-	1074635	1075058	424	424	exonic	XM_020823151.2	NW_021318595.1:1068869_1080042_-	1701	110096975	LOC110096975	uncharacterized LOC110096975	-	-	-	-
circRNA_0255|NW_021318595.1:2420558_2422284_-	NW_021318595.1	-	2420558	2422284	1727	397	sense-overlapping	XM_020825381.2	NW_021318595.1:2380828_2434111_-	2483	110098524	LOC110098524	ABC transporter B family member 25	GO:0005623,GO:0016021,GO:0009705,GO:0015083,GO:0005524,GO:0016887,GO:0042626,GO:1902602,GO:0010217,GO:0010044	cell|integral component of membrane|plant-type vacuole membrane|aluminum ion transmembrane transporter activity|ATP binding|ATPase activity|ATPase-coupled transmembrane transporter activity|aluminum ion transmembrane transport|cellular aluminum ion homeostasis|response to aluminum ion	-	-
circRNA_0256|NW_021318595.1:2660381_2661542_-	NW_021318595.1	-	2660381	2661542	1162	217	sense-overlapping	XM_020828890.2	NW_021318595.1:2650379_2666605_-	763	110101109	LOC110101109	universal stress protein PHOS34	GO:0005829,GO:0005886,GO:0016208	cytosol|plasma membrane|AMP binding	-	-
circRNA_0257|NW_021318595.1:2746436_2747229_-	NW_021318595.1	-	2746436	2747229	794	521	sense-overlapping	XM_020848115.2	NW_021318595.1:2736402_2750315_-	2675	110115019	LOC110115019	protein STRUBBELIG-RECEPTOR FAMILY 6-like	-	-	-	-
circRNA_0258|NW_021318595.1:3253667_3254812_+	NW_021318595.1	+	3253667	3254812	1146	1146	exonic	XM_020847556.2	NW_021318595.1:3252261_3274819_+	2114	110114623	LOC110114623	putative BTB/POZ domain-containing protein At3g08660	GO:0016567	protein ubiquitination	-	-
circRNA_0259|NW_021318595.1:4893477_4894120_+	NW_021318595.1	+	4893477	4894120	644	441	sense-overlapping	XM_020835347.2	NW_021318595.1:4884223_4900708_+	2661	110105738	LOC110105738	magnesium-chelatase subunit ChlD, chloroplastic, transcript variant X3	GO:0009570,GO:0009534,GO:0005524,GO:0016851,GO:0015995,GO:0015979	chloroplast stroma|chloroplast thylakoid|ATP binding|magnesium chelatase activity|chlorophyll biosynthetic process|photosynthesis	path:dct00860,path:dct01100,path:dct01110	Porphyrin and chlorophyll metabolism|Metabolic pathways|Biosynthesis of secondary metabolites
circRNA_0260|NW_021318595.1:4956888_4957729_+	NW_021318595.1	+	4956888	4957729	842	281	sense-overlapping	XM_020835355.2	NW_021318595.1:4933421_4967423_+	1835	110105744	LOC110105744	folylpolyglutamate synthase, transcript variant X2	GO:0005737,GO:0005829,GO:0005743,GO:0005759,GO:0005739,GO:0005524,GO:0046872,GO:0004326,GO:0009396,GO:0006730,GO:0009853,GO:0090351,GO:0046901	cytoplasm|cytosol|mitochondrial inner membrane|mitochondrial matrix|mitochondrion|ATP binding|metal ion binding|tetrahydrofolylpolyglutamate synthase activity|folic acid-containing compound biosynthetic process|one-carbon metabolic process|photorespiration|seedling development|tetrahydrofolylpolyglutamate biosynthetic process	path:dct00790,path:dct01100	Folate biosynthesis|Metabolic pathways
circRNA_0261|NW_021318595.1:5169316_5184355_-	NW_021318595.1	-	5169316	5184355	15040	528	sense-overlapping	XM_020835349.2	NW_021318595.1:5163702_5184355_-	1302	110105740	LOC110105740	S-formylglutathione hydrolase	GO:0048046,GO:0005829,GO:0052689,GO:0018738,GO:0046294,GO:0046686	apoplast|cytosol|carboxylic ester hydrolase activity|S-formylglutathione hydrolase activity|formaldehyde catabolic process|response to cadmium ion	path:dct01100,path:dct01200	Metabolic pathways|Carbon metabolism
circRNA_0262|NW_021318595.1:6066849_6067299_+	NW_021318595.1	+	6066849	6067299	451	451	intergenic
circRNA_0263|NW_021318595.1:6297540_6302484_+	NW_021318595.1	+	6297540	6302484	4945	471	sense-overlapping	XM_020847956.2	NW_021318595.1:6285331_6354643_+	2568	110114912	LOC110114912	uncharacterized LOC110114912	-	-	-	-
circRNA_0264|NW_021318595.1:6302150_6312330_+	NW_021318595.1	+	6302150	6312330	10181	713	sense-overlapping	XM_020847956.2	NW_021318595.1:6285331_6354643_+	2568	110114912	LOC110114912	uncharacterized LOC110114912	-	-	-	-
circRNA_0265|NW_021318595.1:6302150_6315415_+	NW_021318595.1	+	6302150	6315415	13266	810	sense-overlapping	XM_020847956.2	NW_021318595.1:6285331_6354643_+	2568	110114912	LOC110114912	uncharacterized LOC110114912	-	-	-	-
circRNA_0266|NW_021318595.1:6598184_6598724_-	NW_021318595.1	-	6598184	6598724	541	341	sense-overlapping	XM_020847953.2	NW_021318595.1:6566106_6605782_-	2151	110114909	LOC110114909	actin-interacting protein 1-2	GO:0042643,GO:0030864,GO:0080008,GO:0005829,GO:0051015,GO:0030042,GO:0030836	actomyosin, actin portion|cortical actin cytoskeleton|Cul4-RING E3 ubiquitin ligase complex|cytosol|actin filament binding|actin filament depolymerization|positive regulation of actin filament depolymerization	-	-
circRNA_0267|NW_021318595.1:6725160_6725525_+	NW_021318595.1	+	6725160	6725525	366	366	sense-overlapping
circRNA_0268|NW_021318595.1:6814714_6817242_+	NW_021318595.1	+	6814714	6817242	2529	545	sense-overlapping	XM_020827473.2	NW_021318595.1:6812321_6820427_+	1164	110100081	LOC110100081	putative RNA-binding protein YlmH	-	-	-	-
circRNA_0269|NW_021318595.1:6814722_6817242_+	NW_021318595.1	+	6814722	6817242	2521	537	sense-overlapping	XM_020827473.2	NW_021318595.1:6812321_6820427_+	1164	110100081	LOC110100081	putative RNA-binding protein YlmH	-	-	-	-
circRNA_0270|NW_021318595.1:6875670_6876036_+	NW_021318595.1	+	6875670	6876036	367	213	sense-overlapping	XM_020827470.2	NW_021318595.1:6871409_6876940_+	1667	110100078	LOC110100078	pentatricopeptide repeat-containing protein At2g27800, mitochondrial, transcript variant X2	-	-	-	-
circRNA_0271|NW_021318595.1:7360838_7361237_+	NW_021318595.1	+	7360838	7361237	400	300	sense-overlapping	XM_020823085.2	NW_021318595.1:7343982_7368651_+	5640	110096928	LOC110096928	homeobox-DDT domain protein RLT2, transcript variant X4	GO:0005634,GO:0003700,GO:0043565,GO:0009908,GO:0045892,GO:0006351,GO:0010228	nucleus|DNA-binding transcription factor activity|sequence-specific DNA binding|flower development|negative regulation of transcription, DNA-templated|transcription, DNA-templated|vegetative to reproductive phase transition of meristem	-	-
circRNA_0272|NW_021318595.1:7365021_7366893_+	NW_021318595.1	+	7365021	7366893	1873	957	sense-overlapping	XM_020823081.2	NW_021318595.1:7343983_7368651_+	5744	110096928	LOC110096928	homeobox-DDT domain protein RLT2, transcript variant X1	GO:0005634,GO:0003700,GO:0043565,GO:0009908,GO:0045892,GO:0006351,GO:0010228	nucleus|DNA-binding transcription factor activity|sequence-specific DNA binding|flower development|negative regulation of transcription, DNA-templated|transcription, DNA-templated|vegetative to reproductive phase transition of meristem	-	-
circRNA_0273|NW_021318595.1:7701973_7702833_-	NW_021318595.1	-	7701973	7702833	861	632	sense-overlapping	XM_020823093.2	NW_021318595.1:7696740_7715826_-	1439	110096934	LOC110096934	mitogen-activated protein kinase kinase 6, transcript variant X1	GO:0005737,GO:0005856,GO:0009524,GO:0005524,GO:0004708,GO:0051019,GO:0031435,GO:0004674,GO:0032147,GO:0002229,GO:0010311,GO:0007112,GO:0023014	cytoplasm|cytoskeleton|phragmoplast|ATP binding|MAP kinase kinase activity|mitogen-activated protein kinase binding|mitogen-activated protein kinase kinase kinase binding|protein serine/threonine kinase activity|activation of protein kinase activity|defense response to oomycetes|lateral root formation|male meiosis cytokinesis|signal transduction by protein phosphorylation	path:dct04626	Plant-pathogen interaction
circRNA_0274|NW_021318595.1:7701973_7705201_-	NW_021318595.1	-	7701973	7705201	3229	767	sense-overlapping	XM_020823093.2	NW_021318595.1:7696740_7715826_-	1439	110096934	LOC110096934	mitogen-activated protein kinase kinase 6, transcript variant X1	GO:0005737,GO:0005856,GO:0009524,GO:0005524,GO:0004708,GO:0051019,GO:0031435,GO:0004674,GO:0032147,GO:0002229,GO:0010311,GO:0007112,GO:0023014	cytoplasm|cytoskeleton|phragmoplast|ATP binding|MAP kinase kinase activity|mitogen-activated protein kinase binding|mitogen-activated protein kinase kinase kinase binding|protein serine/threonine kinase activity|activation of protein kinase activity|defense response to oomycetes|lateral root formation|male meiosis cytokinesis|signal transduction by protein phosphorylation	path:dct04626	Plant-pathogen interaction
circRNA_0275|NW_021318595.1:7998211_7999027_+	NW_021318595.1	+	7998211	7999027	817	445	sense-overlapping	XM_020828902.2	NW_021318595.1:7992606_8004355_+	1603	110101120	LOC110101120	haloacid dehalogenase-like hydrolase domain-containing protein 3	GO:0005829,GO:0005634,GO:0016791	cytosol|nucleus|phosphatase activity	-	-
circRNA_0276|NW_021318595.1:8052558_8052968_+	NW_021318595.1	+	8052558	8052968	411	281	sense-overlapping	XM_028699877.1	NW_021318595.1:8024923_8062177_+	1441	110101123	LOC110101123	protein LONG AFTER FAR-RED 3, transcript variant X3	GO:0016021,GO:0048471,GO:0016810,GO:0009704,GO:0010218,GO:0009845	integral component of membrane|perinuclear region of cytoplasm|hydrolase activity, acting on carbon-nitrogen (but not peptide) bonds|de-etiolation|response to far red light|seed germination	-	-
circRNA_0277|NW_021318595.1:8052558_8059633_+	NW_021318595.1	+	8052558	8059633	7076	485	sense-overlapping	XM_020828908.2	NW_021318595.1:8024924_8062177_+	1533	110101123	LOC110101123	protein LONG AFTER FAR-RED 3, transcript variant X2	GO:0016021,GO:0048471,GO:0016810,GO:0009704,GO:0010218,GO:0009845	integral component of membrane|perinuclear region of cytoplasm|hydrolase activity, acting on carbon-nitrogen (but not peptide) bonds|de-etiolation|response to far red light|seed germination	-	-
circRNA_0278|NW_021318595.1:8058844_8059633_+	NW_021318595.1	+	8058844	8059633	790	204	sense-overlapping	XM_020828908.2	NW_021318595.1:8024924_8062177_+	1533	110101123	LOC110101123	protein LONG AFTER FAR-RED 3, transcript variant X2	GO:0016021,GO:0048471,GO:0016810,GO:0009704,GO:0010218,GO:0009845	integral component of membrane|perinuclear region of cytoplasm|hydrolase activity, acting on carbon-nitrogen (but not peptide) bonds|de-etiolation|response to far red light|seed germination	-	-
circRNA_0279|NW_021318595.1:8399732_8401173_-	NW_021318595.1	-	8399732	8401173	1442	340	sense-overlapping	XM_020844795.2	NW_021318595.1:8393954_8412939_-	2768	110112541	LOC110112541	mitochondrial substrate carrier family protein C	GO:0009941,GO:0031969,GO:0016021,GO:0005743,GO:0000095	chloroplast envelope|chloroplast membrane|integral component of membrane|mitochondrial inner membrane|S-adenosyl-L-methionine transmembrane transporter activity	-	-
circRNA_0280|NW_021318595.1:10011515_10017076_+	NW_021318595.1	+	10011515	10017076	5562	3219	sense-overlapping	XM_020841303.2	NW_021318595.1:10011230_10015199_+	1414	110110021	LOC110110021	probable aldo-keto reductase 1	GO:0016491	oxidoreductase activity	-	-
circRNA_0281|NW_021318595.1:10011515_10024761_+	NW_021318595.1	+	10011515	10024761	13247	10904	sense-overlapping	XM_020841303.2	NW_021318595.1:10011230_10015199_+	1414	110110021	LOC110110021	probable aldo-keto reductase 1	GO:0016491	oxidoreductase activity	-	-
circRNA_0282|NW_021318595.1:10012057_10017891_+	NW_021318595.1	+	10012057	10017891	5835	3659	sense-overlapping	XM_020841303.2	NW_021318595.1:10011230_10015199_+	1414	110110021	LOC110110021	probable aldo-keto reductase 1	GO:0016491	oxidoreductase activity	-	-
circRNA_0283|NW_021318595.1:10012057_10025558_+	NW_021318595.1	+	10012057	10025558	13502	11326	sense-overlapping	XM_020841303.2	NW_021318595.1:10011230_10015199_+	1414	110110021	LOC110110021	probable aldo-keto reductase 1	GO:0016491	oxidoreductase activity	-	-
circRNA_0284|NW_021318595.1:10949022_10949503_-	NW_021318595.1	-	10949022	10949503	482	321	sense-overlapping	XM_020843141.2	NW_021318595.1:10932177_10968244_-	2371	110111327	LOC110111327	ABC transporter F family member 5	GO:0005524,GO:0016887,GO:0009624	ATP binding|ATPase activity|response to nematode	-	-
circRNA_0285|NW_021318595.1:10949022_10954257_-	NW_021318595.1	-	10949022	10954257	5236	663	sense-overlapping	XM_020843141.2	NW_021318595.1:10932177_10968244_-	2371	110111327	LOC110111327	ABC transporter F family member 5	GO:0005524,GO:0016887,GO:0009624	ATP binding|ATPase activity|response to nematode	-	-
circRNA_0286|NW_021318595.1:11043128_11046430_-	NW_021318595.1	-	11043128	11046430	3303	278	sense-overlapping	XM_020843128.2	NW_021318595.1:11042584_11047446_-	1175	110111318	LOC110111318	dnaJ-like protein MG002	GO:0009507,GO:0009570,GO:0005634,GO:0009536	chloroplast|chloroplast stroma|nucleus|plastid	-	-
circRNA_0287|NW_021318595.1:11245496_11258323_-	NW_021318595.1	-	11245496	11258323	12828	9419	sense-overlapping	XM_020843163.2	NW_021318595.1:11253825_11258832_-	1398	110111342	LOC110111342	very-long-chain enoyl-CoA reductase	GO:0005829,GO:0005783,GO:0005789,GO:0009923,GO:0016021,GO:0005886,GO:0009922,GO:0016491,GO:0102758,GO:0042335,GO:0006665,GO:0010091,GO:1905499,GO:0042761,GO:0010025	cytosol|endoplasmic reticulum|endoplasmic reticulum membrane|fatty acid elongase complex|integral component of membrane|plasma membrane|fatty acid elongase activity|oxidoreductase activity|very-long-chain enoyl-CoA reductase activity|cuticle development|sphingolipid metabolic process|trichome branching|trichome papilla formation|very long-chain fatty acid biosynthetic process|wax biosynthetic pro…	path:dct00062,path:dct01040,path:dct01100,path:dct01110,path:dct01212	Fatty acid elongation|Biosynthesis of unsaturated fatty acids|Metabolic pathways|Biosynthesis of secondary metabolites|Fatty acid metabolism
circRNA_0288|NW_021318595.1:12116931_12150718_+	NW_021318595.1	+	12116931	12150718	33788	28956	sense-overlapping	XM_020824426.2	NW_021318595.1:12143980_12151743_+	2440	110097827	LOC110097827	probable pre-mRNA-splicing factor ATP-dependent RNA helicase DEAH3, transcript variant X1	-	-	path:dct03040	Spliceosome
circRNA_0289|NW_021318595.1:12470082_12470297_+	NW_021318595.1	+	12470082	12470297	216	124	sense-overlapping	XM_020833947.2	NW_021318595.1:12441197_12472104_+	1287	110104719	LOC110104719	ATP-dependent Clp protease proteolytic subunit 5, chloroplastic	GO:0009507,GO:0009941,GO:0009570,GO:0009534,GO:0009840,GO:0009368,GO:0005576,GO:0009532,GO:0009579,GO:0004176,GO:0051117,GO:0004252,GO:0006515	chloroplast|chloroplast envelope|chloroplast stroma|chloroplast thylakoid|chloroplastic endopeptidase Clp complex|endopeptidase Clp complex|extracellular region|plastid stroma|thylakoid|ATP-dependent peptidase activity|ATPase binding|serine-type endopeptidase activity|protein quality control for misfolded or incompletely synthesized proteins	-	-
circRNA_0290|NW_021318595.1:12482538_12482732_+	NW_021318595.1	+	12482538	12482732	195	195	exonic	XM_020833950.2	NW_021318595.1:12480450_12485004_+	2066	110104722	LOC110104722	70 kDa peptidyl-prolyl isomerase	GO:0005737,GO:0005516,GO:0003755,GO:0061077,GO:0000413	cytoplasm|calmodulin binding|peptidyl-prolyl cis-trans isomerase activity|chaperone-mediated protein folding|protein peptidyl-prolyl isomerization	-	-
circRNA_0291|NW_021318595.1:12497105_12499633_-	NW_021318595.1	-	12497105	12499633	2529	204	sense-overlapping	XM_020833943.2	NW_021318595.1:12486501_12499930_-	786	110104716	LOC110104716	FK506-binding protein 2-like	GO:0005788,GO:0003755	endoplasmic reticulum lumen|peptidyl-prolyl cis-trans isomerase activity	-	-
circRNA_0292|NW_021318595.1:14851918_14852186_-	NW_021318595.1	-	14851918	14852186	269	177	sense-overlapping	XM_020836901.2	NW_021318595.1:14850428_14886049_-	1603	110106847	LOC110106847	proline iminopeptidase	-	-	-	-
circRNA_0293|NW_021318595.1:14931697_14961656_+	NW_021318595.1	+	14931697	14961656	29960	415	sense-overlapping	XM_020836902.2	NW_021318595.1:14918802_14983320_+	1984	110106848	LOC110106848	protein disulfide isomerase-like 1-5	GO:0005623,GO:0005829,GO:0005783,GO:0005788,GO:0003756,GO:0045454,GO:0006457,GO:0034976	cell|cytosol|endoplasmic reticulum|endoplasmic reticulum lumen|protein disulfide isomerase activity|cell redox homeostasis|protein folding|response to endoplasmic reticulum stress	path:dct04141	Protein processing in endoplasmic reticulum
circRNA_0294|NW_021318596.1:37976_39541_+	NW_021318596.1	+	37976	39541	1566	817	sense-overlapping	XM_020838951.2	NW_021318596.1:19959_50706_+	3068	110108344	LOC110108344	protein ENHANCED DISEASE RESISTANCE 2, transcript variant X1	GO:0005789,GO:0010008,GO:0016021,GO:0005886,GO:0070273,GO:0009873,GO:1900056,GO:0009626,GO:1900150,GO:0009723,GO:0009751	endoplasmic reticulum membrane|endosome membrane|integral component of membrane|plasma membrane|phosphatidylinositol-4-phosphate binding|ethylene-activated signaling pathway|negative regulation of leaf senescence|plant-type hypersensitive response|regulation of defense response to fungus|response to ethylene|response to salicylic acid	-	-
circRNA_0295|NW_021318596.1:230075_230602_-	NW_021318596.1	-	230075	230602	528	444	sense-overlapping	XM_020838954.2	NW_021318596.1:224520_231107_-	1694	110108345	LOC110108345	maltose excess protein 1-like, chloroplastic	GO:0009941,GO:0009706,GO:0016021,GO:0005363,GO:0000023	chloroplast envelope|chloroplast inner membrane|integral component of membrane|maltose transmembrane transporter activity|maltose metabolic process	-	-
circRNA_0296|NW_021318596.1:230450_230602_-	NW_021318596.1	-	230450	230602	153	153	exonic	XM_020838954.2	NW_021318596.1:224520_231107_-	1694	110108345	LOC110108345	maltose excess protein 1-like, chloroplastic	GO:0009941,GO:0009706,GO:0016021,GO:0005363,GO:0000023	chloroplast envelope|chloroplast inner membrane|integral component of membrane|maltose transmembrane transporter activity|maltose metabolic process	-	-
circRNA_0297|NW_021318596.1:706613_720069_+	NW_021318596.1	+	706613	720069	13457	12796	sense-overlapping	XM_028700523.1	NW_021318596.1:700466_721980_+	1791	110095267	LOC110095267	beta-glucosidase 18, transcript variant X1	GO:0008422,GO:0102483,GO:0005975	beta-glucosidase activity|scopolin beta-glucosidase activity|carbohydrate metabolic process	path:dct00460,path:dct00500,path:dct00940,path:dct01100,path:dct01110	Cyanoamino acid metabolism|Starch and sucrose metabolism|Phenylpropanoid biosynthesis|Metabolic pathways|Biosynthesis of secondary metabolites
circRNA_0298|NW_021318596.1:793482_793684_-	NW_021318596.1	-	793482	793684	203	203	exonic	XM_020820735.2	NW_021318596.1:788620_838830_-	3551	110095274	LOC110095274	E3 ubiquitin-protein ligase BRE1-like 1, transcript variant X1	GO:0005739,GO:0005634,GO:0046872,GO:0042803,GO:0004842,GO:0051301,GO:0009817,GO:0009908,GO:0033523,GO:0010390,GO:0009965,GO:0051781,GO:0010389,GO:0010162,GO:0010228	mitochondrion|nucleus|metal ion binding|protein homodimerization activity|ubiquitin-protein transferase activity|cell division|defense response to fungus, incompatible interaction|flower development|histone H2B ubiquitination|histone monoubiquitination|leaf morphogenesis|positive regulation of cell division|regulation of G2/M transition of mitotic cell cycle|seed dormancy process|vegetative to re…	-	-
circRNA_0299|NW_021318596.1:801540_803531_-	NW_021318596.1	-	801540	803531	1992	432	sense-overlapping	XM_020820735.2	NW_021318596.1:788620_838830_-	3551	110095274	LOC110095274	E3 ubiquitin-protein ligase BRE1-like 1, transcript variant X1	GO:0005739,GO:0005634,GO:0046872,GO:0042803,GO:0004842,GO:0051301,GO:0009817,GO:0009908,GO:0033523,GO:0010390,GO:0009965,GO:0051781,GO:0010389,GO:0010162,GO:0010228	mitochondrion|nucleus|metal ion binding|protein homodimerization activity|ubiquitin-protein transferase activity|cell division|defense response to fungus, incompatible interaction|flower development|histone H2B ubiquitination|histone monoubiquitination|leaf morphogenesis|positive regulation of cell division|regulation of G2/M transition of mitotic cell cycle|seed dormancy process|vegetative to re…	-	-
circRNA_0300|NW_021318596.1:950462_950772_-	NW_021318596.1	-	950462	950772	311	238	sense-overlapping	XM_020820764.2	NW_021318596.1:940939_950813_-	586	110095292	LOC110095292	DNA mismatch repair protein MSH4-like	GO:0000794,GO:0043073,GO:0000228,GO:0009506,GO:0000795,GO:0005524,GO:0008094,GO:0030983,GO:0045143,GO:0010777,GO:0007131,GO:0000712,GO:0007129	condensed nuclear chromosome|germ cell nucleus|nuclear chromosome|plasmodesma|synaptonemal complex|ATP binding|DNA-dependent ATPase activity|mismatched DNA binding|homologous chromosome segregation|meiotic mismatch repair involved in reciprocal meiotic recombination|reciprocal meiotic recombination|resolution of meiotic recombination intermediates|synapsis	-	-
circRNA_0301|NW_021318596.1:964120_964679_-	NW_021318596.1	-	964120	964679	560	483	sense-overlapping	XM_020820733.2	NW_021318596.1:958760_969110_-	2231	110095273	LOC110095273	polyadenylate-binding protein-interacting protein 7	GO:0003729	mRNA binding	-	-
circRNA_0302|NW_021318596.1:1183635_1183991_+	NW_021318596.1	+	1183635	1183991	357	228	sense-overlapping	XM_020843278.2	NW_021318596.1:1150712_1189547_+	1414	110111413	LOC110111413	probable 3-hydroxyisobutyrate dehydrogenase, mitochondrial, transcript variant X1	GO:0005739,GO:0008442,GO:0051287,GO:0050661,GO:0043621,GO:0006551,GO:0006574,GO:0006573	mitochondrion|3-hydroxyisobutyrate dehydrogenase activity|NAD binding|NADP binding|protein self-association|leucine metabolic process|valine catabolic process|valine metabolic process	path:dct00280,path:dct00410,path:dct00640,path:dct01100,path:dct01200	Valine, leucine and isoleucine degradation|beta-Alanine metabolism|Propanoate metabolism|Metabolic pathways|Carbon metabolism
circRNA_0303|NW_021318596.1:1501084_1513424_+	NW_021318596.1	+	1501084	1513424	12341	210	sense-overlapping	XM_028700609.1	NW_021318596.1:1460901_1515351_+	2323	110111411	LOC110111411	double-strand break repair protein MRE11, transcript variant X3	GO:0030870,GO:0008408,GO:0004519,GO:0030145,GO:0000724,GO:0006303,GO:0042138,GO:0097552,GO:0007095,GO:0000723	Mre11 complex|3'-5' exonuclease activity|endonuclease activity|manganese ion binding|double-strand break repair via homologous recombination|double-strand break repair via nonhomologous end joining|meiotic DNA double-strand break formation|mitochondrial double-strand break repair via homologous recombination|mitotic G2 DNA damage checkpoint|telomere maintenance	path:dct03440,path:dct03450	Homologous recombination|Non-homologous end-joining
circRNA_0304|NW_021318596.1:1525773_1526653_-	NW_021318596.1	-	1525773	1526653	881	400	sense-overlapping	XM_020843234.2	NW_021318596.1:1522698_1542595_-	2428	110111389	LOC110111389	probable glutamate carboxypeptidase LAMP1	GO:0005783,GO:0005789,GO:0016021,GO:0005773,GO:0004180,GO:0046872,GO:0008237,GO:0010073,GO:0007275,GO:0040008	endoplasmic reticulum|endoplasmic reticulum membrane|integral component of membrane|vacuole|carboxypeptidase activity|metal ion binding|metallopeptidase activity|meristem maintenance|multicellular organism development|regulation of growth	-	-
circRNA_0305|NW_021318600.1:414641_415589_-	NW_021318600.1	-	414641	415589	949	800	sense-overlapping	XM_020845957.2	NW_021318600.1:376921_424095_-	4339	110113393	LOC110113393	paladin	-	-	-	-
circRNA_0306|NW_021318600.1:414999_415282_-	NW_021318600.1	-	414999	415282	284	284	exonic	XM_020845957.2	NW_021318600.1:376921_424095_-	4339	110113393	LOC110113393	paladin	-	-	-	-
circRNA_0307|NW_021318604.1:142445_142596_+	NW_021318604.1	+	142445	142596	152	152	exonic	XM_020832882.2	NW_021318604.1:141817_160429_+	3104	110103974	LOC110103974	probable UDP-N-acetylglucosamine--peptide N-acetylglucosaminyltransferase SEC, transcript variant X2	GO:0016757,GO:0007275,GO:0006493	transferase activity, transferring glycosyl groups|multicellular organism development|protein O-linked glycosylation	path:dct00514	Other types of O-glycan biosynthesis
circRNA_0308|NW_021318604.1:183123_183609_-	NW_021318604.1	-	183123	183609	487	304	sense-overlapping	XM_020832916.2	NW_021318604.1:182328_191795_-	1773	110103995	LOC110103995	uncharacterized LOC110103995, transcript variant X1	-	-	-	-
circRNA_0309|NW_021318604.1:183289_183609_-	NW_021318604.1	-	183289	183609	321	252	sense-overlapping	XM_020832916.2	NW_021318604.1:182328_191795_-	1773	110103995	LOC110103995	uncharacterized LOC110103995, transcript variant X1	-	-	-	-
circRNA_0310|NW_021318604.1:264582_265924_-	NW_021318604.1	-	264582	265924	1343	616	sense-overlapping	XM_020832883.2	NW_021318604.1:232522_270239_-	2814	110103975	LOC110103975	squamosa promoter-binding-like protein 9	GO:0005634,GO:0046872,GO:0043565,GO:0055070,GO:0006355	nucleus|metal ion binding|sequence-specific DNA binding|copper ion homeostasis|regulation of transcription, DNA-templated	-	-
circRNA_0311|NW_021318604.1:378675_400140_+	NW_021318604.1	+	378675	400140	21466	864	sense-overlapping	XM_020832874.2	NW_021318604.1:364272_406145_+	3014	110103967	LOC110103967	pyruvate, phosphate dikinase, chloroplastic, transcript variant X1	GO:0009507,GO:0005524,GO:0016301,GO:0046872,GO:0050242,GO:0015979,GO:0006090	chloroplast|ATP binding|kinase activity|metal ion binding|pyruvate, phosphate dikinase activity|photosynthesis|pyruvate metabolic process	path:dct00010,path:dct00620,path:dct00710,path:dct01100,path:dct01110,path:dct01200	Glycolysis / Gluconeogenesis|Pyruvate metabolism|Carbon fixation in photosynthetic organisms|Metabolic pathways|Biosynthesis of secondary metabolites|Carbon metabolism
circRNA_0312|NW_021318604.1:427453_428083_-	NW_021318604.1	-	427453	428083	631	448	sense-overlapping	XM_020832890.2	NW_021318604.1:425886_462932_-	2740	110103978	LOC110103978	probable acyl-CoA dehydrogenase IBR3	GO:0005777,GO:0050660,GO:0016627,GO:0006631,GO:0048767	peroxisome|flavin adenine dinucleotide binding|oxidoreductase activity, acting on the CH-CH group of donors|fatty acid metabolic process|root hair elongation	path:dct00071,path:dct00280,path:dct01100,path:dct01110,path:dct01212	Fatty acid degradation|Valine, leucine and isoleucine degradation|Metabolic pathways|Biosynthesis of secondary metabolites|Fatty acid metabolism
circRNA_0313|NW_021318604.1:623314_623729_+	NW_021318604.1	+	623314	623729	416	328	sense-overlapping	XM_020832879.2	NW_021318604.1:573100_626559_+	2133	110103971	LOC110103971	probable histone-arginine methyltransferase CARM1	GO:0005737,GO:0005634,GO:0042054,GO:0035242,GO:0034969	cytoplasm|nucleus|histone methyltransferase activity|protein-arginine omega-N asymmetric methyltransferase activity|histone arginine methylation	-	-
circRNA_0314|NW_021318604.1:657233_657509_-	NW_021318604.1	-	657233	657509	277	213	sense-overlapping	XM_020832888.2	NW_021318604.1:645050_693376_-	1171	110103976	LOC110103976	ubiquitin-like-specific protease 1A, transcript variant X3	GO:0005634,GO:0009506,GO:0070140,GO:0016926	nucleus|plasmodesma|SUMO-specific isopeptidase activity|protein desumoylation	-	-
circRNA_0315|NW_021318604.1:884489_892781_+	NW_021318604.1	+	884489	892781	8293	219	sense-overlapping	XM_028700683.1	NW_021318604.1:873048_923886_+	2375	110094100	LOC110094100	pentatricopeptide repeat-containing protein At4g21880, mitochondrial-like	-	-	-	-
circRNA_0316|NW_021318604.1:941039_942348_+	NW_021318604.1	+	941039	942348	1310	444	sense-overlapping	XM_020819256.2	NW_021318604.1:930068_948926_+	1088	110094104	LOC110094104	peroxisome biogenesis protein 22-like, transcript variant X2	GO:0016021,GO:0005778,GO:0007031,GO:0015031	integral component of membrane|peroxisomal membrane|peroxisome organization|protein transport	-	-
circRNA_0317|NW_021318608.1:65723_66586_-	NW_021318608.1	-	65723	66586	864	302	sense-overlapping	XM_020847194.2	NW_021318608.1:61804_72841_-	1493	110114343	LOC110114343	acyl-CoA-binding domain-containing protein 1	GO:0005783,GO:0005789,GO:0009514,GO:0016021,GO:0005778,GO:0005886,GO:0000062,GO:0032791,GO:0008289,GO:0006869,GO:0001666,GO:0010288	endoplasmic reticulum|endoplasmic reticulum membrane|glyoxysome|integral component of membrane|peroxisomal membrane|plasma membrane|fatty-acyl-CoA binding|lead ion binding|lipid binding|lipid transport|response to hypoxia|response to lead ion	-	-
circRNA_0318|NW_021318608.1:118556_118883_+	NW_021318608.1	+	118556	118883	328	328	exonic	XM_020847217.2	NW_021318608.1:113039_122256_+	1912	110114360	LOC110114360	catalase isozyme A	GO:0005737,GO:0005886,GO:0004096,GO:0020037,GO:0046872,GO:0007623,GO:0042744,GO:0009737,GO:0009617,GO:0009408,GO:0042542,GO:0009416,GO:1902074,GO:0009414	cytoplasm|plasma membrane|catalase activity|heme binding|metal ion binding|circadian rhythm|hydrogen peroxide catabolic process|response to abscisic acid|response to bacterium|response to heat|response to hydrogen peroxide|response to light stimulus|response to salt|response to water deprivation	path:dct00380,path:dct00630,path:dct01100,path:dct01110,path:dct01200,path:dct04016,path:dct04146	Tryptophan metabolism|Glyoxylate and dicarboxylate metabolism|Metabolic pathways|Biosynthesis of secondary metabolites|Carbon metabolism|MAPK signaling pathway - plant|Peroxisome
circRNA_0319|NW_021318608.1:290904_291243_-	NW_021318608.1	-	290904	291243	340	212	sense-overlapping	XM_020847202.2	NW_021318608.1:288890_372950_-	1849	110114350	LOC110114350	probable bifunctional methylthioribulose-1-phosphate dehydratase/enolase-phosphatase E1 1, transcript variant X1	GO:0005737,GO:0043715,GO:0043716,GO:0043874,GO:0000287,GO:0046570,GO:0008270,GO:0019509,GO:0019284	cytoplasm|2,3-diketo-5-methylthiopentyl-1-phosphate enolase activity|2-hydroxy-3-keto-5-methylthiopentenyl-1-phosphate phosphatase activity|acireductone synthase activity|magnesium ion binding|methylthioribulose 1-phosphate dehydratase activity|zinc ion binding|L-methionine salvage from methylthioadenosine|L-methionine salvage from S-adenosylmethionine	path:dct00270,path:dct01100	Cysteine and methionine metabolism|Metabolic pathways
circRNA_0320|NW_021318608.1:290904_291260_-	NW_021318608.1	-	290904	291260	357	229	sense-overlapping	XM_020847202.2	NW_021318608.1:288890_372950_-	1849	110114350	LOC110114350	probable bifunctional methylthioribulose-1-phosphate dehydratase/enolase-phosphatase E1 1, transcript variant X1	GO:0005737,GO:0043715,GO:0043716,GO:0043874,GO:0000287,GO:0046570,GO:0008270,GO:0019509,GO:0019284	cytoplasm|2,3-diketo-5-methylthiopentyl-1-phosphate enolase activity|2-hydroxy-3-keto-5-methylthiopentenyl-1-phosphate phosphatase activity|acireductone synthase activity|magnesium ion binding|methylthioribulose 1-phosphate dehydratase activity|zinc ion binding|L-methionine salvage from methylthioadenosine|L-methionine salvage from S-adenosylmethionine	path:dct00270,path:dct01100	Cysteine and methionine metabolism|Metabolic pathways
circRNA_0321|NW_021318608.1:567643_575875_+	NW_021318608.1	+	567643	575875	8233	447	sense-overlapping	XM_028700995.1	NW_021318608.1:550357_594488_+	1249	110114351	LOC110114351	haloalkane dehalogenase 2, transcript variant X3	GO:0052689,GO:0004301,GO:0097176	carboxylic ester hydrolase activity|epoxide hydrolase activity|epoxide metabolic process	-	-
circRNA_0322|NW_021318608.1:567643_575882_+	NW_021318608.1	+	567643	575882	8240	454	sense-overlapping	XM_028700995.1	NW_021318608.1:550357_594488_+	1249	110114351	LOC110114351	haloalkane dehalogenase 2, transcript variant X3	GO:0052689,GO:0004301,GO:0097176	carboxylic ester hydrolase activity|epoxide hydrolase activity|epoxide metabolic process	-	-
circRNA_0323|NW_021318613.1:140794_141083_-	NW_021318613.1	-	140794	141083	290	207	sense-overlapping	XM_028701132.1	NW_021318613.1:140125_148687_-	1181	110113121	LOC110113121	chloroplast stem-loop binding protein of 41 kDa b, chloroplastic, transcript variant X3	GO:0048046,GO:0009507,GO:0009941,GO:0009570,GO:0005829,GO:0005576,GO:0005777,GO:0009506,GO:0000427,GO:0010287,GO:0005840,GO:0010319,GO:0005773,GO:0050662,GO:0003677,GO:0010297,GO:0003723,GO:0019843,GO:0003978,GO:0042631,GO:0009658,GO:0007623,GO:0042742,GO:0019388,GO:0033499,GO:0005996,GO:0032544,GO:0000272,GO:0045893,GO:0045727,GO:0010468,GO:0009409,GO:0009611,GO:0006364	apoplast|chloroplast|chloroplast envelope|chloroplast stroma|cytosol|extracellular region|peroxisome|plasmodesma|plastid-encoded plastid RNA polymerase complex|plastoglobule|ribosome|stromule|vacuole|coenzyme binding|DNA binding|heteropolysaccharide binding|RNA binding|rRNA binding|UDP-glucose 4-epimerase activity|cellular response to water deprivation|chloroplast organization|circadian rhythm|de…	-	-
circRNA_0324|NW_021318613.1:142613_146588_-	NW_021318613.1	-	142613	146588	3976	338	sense-overlapping	XM_028701132.1	NW_021318613.1:140125_148687_-	1181	110113121	LOC110113121	chloroplast stem-loop binding protein of 41 kDa b, chloroplastic, transcript variant X3	GO:0048046,GO:0009507,GO:0009941,GO:0009570,GO:0005829,GO:0005576,GO:0005777,GO:0009506,GO:0000427,GO:0010287,GO:0005840,GO:0010319,GO:0005773,GO:0050662,GO:0003677,GO:0010297,GO:0003723,GO:0019843,GO:0003978,GO:0042631,GO:0009658,GO:0007623,GO:0042742,GO:0019388,GO:0033499,GO:0005996,GO:0032544,GO:0000272,GO:0045893,GO:0045727,GO:0010468,GO:0009409,GO:0009611,GO:0006364	apoplast|chloroplast|chloroplast envelope|chloroplast stroma|cytosol|extracellular region|peroxisome|plasmodesma|plastid-encoded plastid RNA polymerase complex|plastoglobule|ribosome|stromule|vacuole|coenzyme binding|DNA binding|heteropolysaccharide binding|RNA binding|rRNA binding|UDP-glucose 4-epimerase activity|cellular response to water deprivation|chloroplast organization|circadian rhythm|de…	-	-
circRNA_0325|NW_021318613.1:142613_146874_-	NW_021318613.1	-	142613	146874	4262	429	sense-overlapping	XM_028701132.1	NW_021318613.1:140125_148687_-	1181	110113121	LOC110113121	chloroplast stem-loop binding protein of 41 kDa b, chloroplastic, transcript variant X3	GO:0048046,GO:0009507,GO:0009941,GO:0009570,GO:0005829,GO:0005576,GO:0005777,GO:0009506,GO:0000427,GO:0010287,GO:0005840,GO:0010319,GO:0005773,GO:0050662,GO:0003677,GO:0010297,GO:0003723,GO:0019843,GO:0003978,GO:0042631,GO:0009658,GO:0007623,GO:0042742,GO:0019388,GO:0033499,GO:0005996,GO:0032544,GO:0000272,GO:0045893,GO:0045727,GO:0010468,GO:0009409,GO:0009611,GO:0006364	apoplast|chloroplast|chloroplast envelope|chloroplast stroma|cytosol|extracellular region|peroxisome|plasmodesma|plastid-encoded plastid RNA polymerase complex|plastoglobule|ribosome|stromule|vacuole|coenzyme binding|DNA binding|heteropolysaccharide binding|RNA binding|rRNA binding|UDP-glucose 4-epimerase activity|cellular response to water deprivation|chloroplast organization|circadian rhythm|de…	-	-
circRNA_0326|NW_021318614.1:285903_286382_+	NW_021318614.1	+	285903	286382	480	381	sense-overlapping	XM_028701165.1	NW_021318614.1:261585_308467_+	1571	110101131	LOC110101131	SNF1-related protein kinase regulatory subunit gamma-1, transcript variant X2	GO:0005524,GO:0019887,GO:0005975,GO:0006633,GO:0042128	ATP binding|protein kinase regulator activity|carbohydrate metabolic process|fatty acid biosynthetic process|nitrate assimilation	-	-
circRNA_0327|NW_021318615.1:31918_33195_+	NW_021318615.1	+	31918	33195	1278	504	sense-overlapping	XM_020838867.2	NW_021318615.1:25234_33247_+	898	110108289	LOC110108289	MADS-box protein SVP, transcript variant X2	GO:0005634,GO:0003700,GO:0046983,GO:0000977,GO:0043565,GO:0008134,GO:0044212,GO:0000900,GO:0030154,GO:0048438,GO:0007275,GO:0009910,GO:0045892,GO:0045944,GO:0009266	nucleus|DNA-binding transcription factor activity|protein dimerization activity|RNA polymerase II regulatory region sequence-specific DNA binding|sequence-specific DNA binding|transcription factor binding|transcription regulatory region DNA binding|translation repressor activity, mRNA regulatory element binding|cell differentiation|floral whorl development|multicellular organism development|negat…	-	-
circRNA_0328|NW_021318615.1:382622_389422_+	NW_021318615.1	+	382622	389422	6801	439	sense-overlapping	XM_020823069.2	NW_021318615.1:367903_431528_+	2372	110096918	LOC110096918	outer envelope protein 80, chloroplastic	GO:0009507,GO:0009941,GO:0009707,GO:0016021,GO:0005739,GO:0009536,GO:0001401,GO:0034622,GO:0009658,GO:0009793,GO:0045040	chloroplast|chloroplast envelope|chloroplast outer membrane|integral component of membrane|mitochondrion|plastid|SAM complex|cellular protein-containing complex assembly|chloroplast organization|embryo development ending in seed dormancy|protein insertion into mitochondrial outer membrane	-	-
circRNA_0329|NW_021318615.1:394044_403629_+	NW_021318615.1	+	394044	403629	9586	416	sense-overlapping	XM_020823069.2	NW_021318615.1:367903_431528_+	2372	110096918	LOC110096918	outer envelope protein 80, chloroplastic	GO:0009507,GO:0009941,GO:0009707,GO:0016021,GO:0005739,GO:0009536,GO:0001401,GO:0034622,GO:0009658,GO:0009793,GO:0045040	chloroplast|chloroplast envelope|chloroplast outer membrane|integral component of membrane|mitochondrion|plastid|SAM complex|cellular protein-containing complex assembly|chloroplast organization|embryo development ending in seed dormancy|protein insertion into mitochondrial outer membrane	-	-
circRNA_0330|NW_021318615.1:412009_412511_+	NW_021318615.1	+	412009	412511	503	281	sense-overlapping	XM_020823069.2	NW_021318615.1:367903_431528_+	2372	110096918	LOC110096918	outer envelope protein 80, chloroplastic	GO:0009507,GO:0009941,GO:0009707,GO:0016021,GO:0005739,GO:0009536,GO:0001401,GO:0034622,GO:0009658,GO:0009793,GO:0045040	chloroplast|chloroplast envelope|chloroplast outer membrane|integral component of membrane|mitochondrion|plastid|SAM complex|cellular protein-containing complex assembly|chloroplast organization|embryo development ending in seed dormancy|protein insertion into mitochondrial outer membrane	-	-
circRNA_0331|NW_021318615.1:412024_412511_+	NW_021318615.1	+	412024	412511	488	266	sense-overlapping	XM_020823069.2	NW_021318615.1:367903_431528_+	2372	110096918	LOC110096918	outer envelope protein 80, chloroplastic	GO:0009507,GO:0009941,GO:0009707,GO:0016021,GO:0005739,GO:0009536,GO:0001401,GO:0034622,GO:0009658,GO:0009793,GO:0045040	chloroplast|chloroplast envelope|chloroplast outer membrane|integral component of membrane|mitochondrion|plastid|SAM complex|cellular protein-containing complex assembly|chloroplast organization|embryo development ending in seed dormancy|protein insertion into mitochondrial outer membrane	-	-
circRNA_0332|NW_021318615.1:617769_630932_+	NW_021318615.1	+	617769	630932	13164	486	sense-overlapping	XM_028701220.1	NW_021318615.1:614947_698684_+	3063	110101275	LOC110101275	general transcription factor 3C polypeptide 3, transcript variant X1	GO:0005829,GO:0005634,GO:0000127,GO:0003677,GO:0000995,GO:0001004,GO:0006383,GO:0006384	cytosol|nucleus|transcription factor TFIIIC complex|DNA binding|RNA polymerase III general transcription initiation factor activity|RNA polymerase III transcription regulator recruiting activity|transcription by RNA polymerase III|transcription initiation from RNA polymerase III promoter	-	-
circRNA_0333|NW_021318615.1:692438_692844_+	NW_021318615.1	+	692438	692844	407	304	sense-overlapping	XM_028701220.1	NW_021318615.1:614947_698684_+	3063	110101275	LOC110101275	general transcription factor 3C polypeptide 3, transcript variant X1	GO:0005829,GO:0005634,GO:0000127,GO:0003677,GO:0000995,GO:0001004,GO:0006383,GO:0006384	cytosol|nucleus|transcription factor TFIIIC complex|DNA binding|RNA polymerase III general transcription initiation factor activity|RNA polymerase III transcription regulator recruiting activity|transcription by RNA polymerase III|transcription initiation from RNA polymerase III promoter	-	-
circRNA_0334|NW_021318618.1:1043710_1044027_+	NW_021318618.1	+	1043710	1044027	318	235	sense-overlapping	XM_020839138.2	NW_021318618.1:1040372_1056053_+	1403	110108474	LOC110108474	lipase	GO:0046872,GO:0004806,GO:0016042	metal ion binding|triglyceride lipase activity|lipid catabolic process	-	-
circRNA_0335|NW_021318618.1:1312000_1313933_-	NW_021318618.1	-	1312000	1313933	1934	777	sense-overlapping	XM_028691706.1	NW_021318618.1:1288519_1329516_-	2620	110108471	LOC110108471	CTP synthase 1-like, transcript variant X1	GO:0097268,GO:0005524,GO:0003883,GO:0044210,GO:0006541,GO:0008654,GO:0019856	cytoophidium|ATP binding|CTP synthase activity|'de novo' CTP biosynthetic process|glutamine metabolic process|phospholipid biosynthetic process|pyrimidine nucleobase biosynthetic process	path:dct00240,path:dct01100	Pyrimidine metabolism|Metabolic pathways
circRNA_0336|NW_021318618.1:1671962_1678515_-	NW_021318618.1	-	1671962	1678515	6554	319	sense-overlapping	XM_020819135.2	NW_021318618.1:1653711_1684096_-	2202	110094030	LOC110094030	DNA topoisomerase 2-binding protein 1, transcript variant X1	-	-	-	-
circRNA_0337|NW_021318618.1:1680495_1680915_-	NW_021318618.1	-	1680495	1680915	421	283	sense-overlapping	XM_020819135.2	NW_021318618.1:1653711_1684096_-	2202	110094030	LOC110094030	DNA topoisomerase 2-binding protein 1, transcript variant X1	-	-	-	-
circRNA_0338|NW_021318618.1:1705829_1708282_+	NW_021318618.1	+	1705829	1708282	2454	408	sense-overlapping	XM_028691737.1	NW_021318618.1:1699526_1732565_+	1811	110094056	LOC110094056	protein MSP1, transcript variant X2	GO:0005783,GO:0005524,GO:0007049,GO:0015031	endoplasmic reticulum|ATP binding|cell cycle|protein transport	-	-
circRNA_0339|NW_021318618.1:1705834_1708282_+	NW_021318618.1	+	1705834	1708282	2449	403	sense-overlapping	XM_028691737.1	NW_021318618.1:1699526_1732565_+	1811	110094056	LOC110094056	protein MSP1, transcript variant X2	GO:0005783,GO:0005524,GO:0007049,GO:0015031	endoplasmic reticulum|ATP binding|cell cycle|protein transport	-	-
circRNA_0340|NW_021318618.1:1868002_1868310_+	NW_021318618.1	+	1868002	1868310	309	212	sense-overlapping	XM_020819131.2	NW_021318618.1:1847077_1880304_+	3390	110094028	LOC110094028	dynamin-2A-like, transcript variant X1	GO:0030136,GO:0005737,GO:0005829,GO:0005576,GO:0005794,GO:0000139,GO:0016020,GO:0005874,GO:0009524,GO:0005886,GO:0009506,GO:0005774,GO:0005525,GO:0003924,GO:0008289,GO:0008017,GO:0006896,GO:0000266	clathrin-coated vesicle|cytoplasm|cytosol|extracellular region|Golgi apparatus|Golgi membrane|membrane|microtubule|phragmoplast|plasma membrane|plasmodesma|vacuolar membrane|GTP binding|GTPase activity|lipid binding|microtubule binding|Golgi to vacuole transport|mitochondrial fission	path:dct04144	Endocytosis
circRNA_0341|NW_021318618.1:1913275_1915054_-	NW_021318618.1	-	1913275	1915054	1780	166	sense-overlapping	XM_020819180.2	NW_021318618.1:1913145_1918288_-	828	110094045	LOC110094045	protein COFACTOR ASSEMBLY OF COMPLEX C SUBUNIT B CCB4, chloroplastic, transcript variant X2	GO:0009507,GO:0009535,GO:0016021,GO:0010190	chloroplast|chloroplast thylakoid membrane|integral component of membrane|cytochrome b6f complex assembly	-	-
circRNA_0342|NW_021318618.1:1985629_1985922_+	NW_021318618.1	+	1985629	1985922	294	294	exonic	XM_020819133.2	NW_021318618.1:1981969_1992909_+	3117	110094029	LOC110094029	uncharacterized LOC110094029, transcript variant X1	-	-	-	-
circRNA_0343|NW_021318618.1:1985629_1986168_+	NW_021318618.1	+	1985629	1986168	540	439	sense-overlapping	XM_020819133.2	NW_021318618.1:1981969_1992909_+	3117	110094029	LOC110094029	uncharacterized LOC110094029, transcript variant X1	-	-	-	-
circRNA_0344|NW_021318618.1:2026994_2027851_-	NW_021318618.1	-	2026994	2027851	858	156	sense-overlapping	XM_028691766.1	NW_021318618.1:1998522_2069034_-	4516	110094040	LOC110094040	DNA repair protein REV1, transcript variant X2	GO:0005634,GO:0003684,GO:0017125,GO:0003887,GO:0046872,GO:0006974,GO:0070987,GO:0042276,GO:0010224	nucleus|damaged DNA binding|deoxycytidyl transferase activity|DNA-directed DNA polymerase activity|metal ion binding|cellular response to DNA damage stimulus|error-free translesion synthesis|error-prone translesion synthesis|response to UV-B	-	-
circRNA_0345|NW_021318618.1:2034575_2046766_-	NW_021318618.1	-	2034575	2046766	12192	517	sense-overlapping	XM_028691764.1	NW_021318618.1:1998526_2069034_-	4632	110094040	LOC110094040	DNA repair protein REV1, transcript variant X1	GO:0005634,GO:0003684,GO:0017125,GO:0003887,GO:0046872,GO:0006974,GO:0070987,GO:0042276,GO:0010224	nucleus|damaged DNA binding|deoxycytidyl transferase activity|DNA-directed DNA polymerase activity|metal ion binding|cellular response to DNA damage stimulus|error-free translesion synthesis|error-prone translesion synthesis|response to UV-B	-	-
circRNA_0346|NW_021318618.1:2346491_2350501_-	NW_021318618.1	-	2346491	2350501	4011	292	sense-overlapping	XM_020819188.2	NW_021318618.1:2340748_2362315_-	1554	110094047	LOC110094047	senescence-associated protein OSA15, chloroplastic, transcript variant X5	GO:0009507,GO:0034599,GO:0010150	chloroplast|cellular response to oxidative stress|leaf senescence	-	-
circRNA_0347|NW_021318618.1:2350086_2350501_-	NW_021318618.1	-	2350086	2350501	416	223	sense-overlapping	XM_020819188.2	NW_021318618.1:2340748_2362315_-	1554	110094047	LOC110094047	senescence-associated protein OSA15, chloroplastic, transcript variant X5	GO:0009507,GO:0034599,GO:0010150	chloroplast|cellular response to oxidative stress|leaf senescence	-	-
circRNA_0348|NW_021318618.1:2667278_2668483_-	NW_021318618.1	-	2667278	2668483	1206	552	sense-overlapping	XM_020819221.2	NW_021318618.1:2660198_2674830_-	1906	110094077	LOC110094077	BRCA1-associated protein, transcript variant X1	GO:0000151,GO:0046982,GO:0043130,GO:0004842,GO:0008270,GO:0010029	ubiquitin ligase complex|protein heterodimerization activity|ubiquitin binding|ubiquitin-protein transferase activity|zinc ion binding|regulation of seed germination	-	-
circRNA_0349|NW_021318618.1:2807690_2830827_-	NW_021318618.1	-	2807690	2830827	23138	21494	sense-overlapping	XM_028691883.1	NW_021318618.1:2799689_2809895_-	1643	110094038	LOC110094038	cysteine--tRNA ligase CPS1 homolog, chloroplastic/mitochondrial, transcript variant X6	GO:0009507,GO:0009570,GO:0005737,GO:0005829,GO:0005739,GO:0005524,GO:0004817,GO:0046872,GO:0042407,GO:0006423,GO:0010197,GO:0043067,GO:0006417	chloroplast|chloroplast stroma|cytoplasm|cytosol|mitochondrion|ATP binding|cysteine-tRNA ligase activity|metal ion binding|cristae formation|cysteinyl-tRNA aminoacylation|polar nucleus fusion|regulation of programmed cell death|regulation of translation	path:dct00970	Aminoacyl-tRNA biosynthesis
circRNA_0350|NW_021318618.1:3403719_3449467_+	NW_021318618.1	+	3403719	3449467	45749	43171	sense-overlapping	XM_028691958.1	NW_021318618.1:3403533_3408049_+	1871	110108286	LOC110108286	protein NRT1/ PTR FAMILY 5.10	GO:0016021,GO:0035673,GO:1904680,GO:0015333	integral component of membrane|oligopeptide transmembrane transporter activity|peptide transmembrane transporter activity|peptide:proton symporter activity	-	-
circRNA_0351|NW_021318618.1:4122297_4123008_-	NW_021318618.1	-	4122297	4123008	712	549	sense-overlapping	XM_020846034.2	NW_021318618.1:4091799_4128984_-	1839	110113441	LOC110113441	uncharacterized LOC110113441	-	-	-	-
circRNA_0352|NW_021318618.1:4177142_4184522_+	NW_021318618.1	+	4177142	4184522	7381	320	sense-overlapping	XM_020846035.2	NW_021318618.1:4163011_4185388_+	1324	110113442	LOC110113442	UPF0613 protein PB24D3.06c	GO:0005829,GO:0005634,GO:0016787	cytosol|nucleus|hydrolase activity	-	-
circRNA_0353|NW_021318618.1:4183239_4184522_+	NW_021318618.1	+	4183239	4184522	1284	174	sense-overlapping	XM_020846035.2	NW_021318618.1:4163011_4185388_+	1324	110113442	LOC110113442	UPF0613 protein PB24D3.06c	GO:0005829,GO:0005634,GO:0016787	cytosol|nucleus|hydrolase activity	-	-
circRNA_0354|NW_021318618.1:4212453_4213763_+	NW_021318618.1	+	4212453	4213763	1311	1192	sense-overlapping	XM_020846002.2	NW_021318618.1:4201707_4221290_+	2068	110113416	LOC110113416	AP-5 complex subunit mu	GO:0030119,GO:0030131,GO:0030659,GO:0005829,GO:0005770,GO:0005764,GO:0005739,GO:0016197,GO:0006886	AP-type membrane coat adaptor complex|clathrin adaptor complex|cytoplasmic vesicle membrane|cytosol|late endosome|lysosome|mitochondrion|endosomal transport|intracellular protein transport	-	-
circRNA_0355|NW_021318618.1:4353482_4353950_+	NW_021318618.1	+	4353482	4353950	469	394	sense-overlapping	XM_020845968.2	NW_021318618.1:4255143_4413069_+	8739	110113401	LOC110113401	piezo-type mechanosensitive ion channel homolog, transcript variant X1	GO:0016021,GO:0006811	integral component of membrane|ion transport	-	-
circRNA_0356|NW_021318618.1:4466992_4468115_-	NW_021318618.1	-	4466992	4468115	1124	625	sense-overlapping	XM_028692064.1	NW_021318618.1:4414007_4503189_-	5735	110113399	LOC110113399	transcription initiation factor TFIID subunit 1	GO:0005669,GO:0004402,GO:0043565,GO:0017025,GO:0045944	transcription factor TFIID complex|histone acetyltransferase activity|sequence-specific DNA binding|TBP-class protein binding|positive regulation of transcription by RNA polymerase II	path:dct03022	Basal transcription factors
circRNA_0357|NW_021318618.1:4466992_4473213_-	NW_021318618.1	-	4466992	4473213	6222	863	sense-overlapping	XM_028692064.1	NW_021318618.1:4414007_4503189_-	5735	110113399	LOC110113399	transcription initiation factor TFIID subunit 1	GO:0005669,GO:0004402,GO:0043565,GO:0017025,GO:0045944	transcription factor TFIID complex|histone acetyltransferase activity|sequence-specific DNA binding|TBP-class protein binding|positive regulation of transcription by RNA polymerase II	path:dct03022	Basal transcription factors
circRNA_0358|NW_021318618.1:4472976_4473601_-	NW_021318618.1	-	4472976	4473601	626	441	sense-overlapping	XM_028692064.1	NW_021318618.1:4414007_4503189_-	5735	110113399	LOC110113399	transcription initiation factor TFIID subunit 1	GO:0005669,GO:0004402,GO:0043565,GO:0017025,GO:0045944	transcription factor TFIID complex|histone acetyltransferase activity|sequence-specific DNA binding|TBP-class protein binding|positive regulation of transcription by RNA polymerase II	path:dct03022	Basal transcription factors
circRNA_0359|NW_021318618.1:4487162_4488388_-	NW_021318618.1	-	4487162	4488388	1227	368	sense-overlapping	XM_028692064.1	NW_021318618.1:4414007_4503189_-	5735	110113399	LOC110113399	transcription initiation factor TFIID subunit 1	GO:0005669,GO:0004402,GO:0043565,GO:0017025,GO:0045944	transcription factor TFIID complex|histone acetyltransferase activity|sequence-specific DNA binding|TBP-class protein binding|positive regulation of transcription by RNA polymerase II	path:dct03022	Basal transcription factors
circRNA_0360|NW_021318618.1:4496807_4497023_-	NW_021318618.1	-	4496807	4497023	217	106	sense-overlapping	XM_028692064.1	NW_021318618.1:4414007_4503189_-	5735	110113399	LOC110113399	transcription initiation factor TFIID subunit 1	GO:0005669,GO:0004402,GO:0043565,GO:0017025,GO:0045944	transcription factor TFIID complex|histone acetyltransferase activity|sequence-specific DNA binding|TBP-class protein binding|positive regulation of transcription by RNA polymerase II	path:dct03022	Basal transcription factors
circRNA_0361|NW_021318618.1:4773286_4773762_+	NW_021318618.1	+	4773286	4773762	477	391	sense-overlapping	XM_020845974.2	NW_021318618.1:4753021_4785357_+	3777	110113403	LOC110113403	sister-chromatid cohesion protein 3, transcript variant X2	GO:0000785,GO:0005694,GO:0008278,GO:0005634,GO:0003682,GO:0051455,GO:0051301,GO:0051754,GO:0007062	chromatin|chromosome|cohesin complex|nucleus|chromatin binding|attachment of spindle microtubules to kinetochore involved in homologous chromosome segregation|cell division|meiotic sister chromatid cohesion, centromeric|sister chromatid cohesion	-	-
circRNA_0362|NW_021318618.1:4860438_4861033_-	NW_021318618.1	-	4860438	4861033	596	504	sense-overlapping	XM_020846003.2	NW_021318618.1:4854569_4880636_-	2403	110113417	LOC110113417	acyltransferase-like protein At1g54570, chloroplastic	GO:0009507,GO:0010287,GO:0004144,GO:0033306,GO:0019432	chloroplast|plastoglobule|diacylglycerol O-acyltransferase activity|phytol metabolic process|triglyceride biosynthetic process	-	-
circRNA_0363|NW_021318618.1:4874131_4878409_-	NW_021318618.1	-	4874131	4878409	4279	320	sense-overlapping	XM_020846003.2	NW_021318618.1:4854569_4880636_-	2403	110113417	LOC110113417	acyltransferase-like protein At1g54570, chloroplastic	GO:0009507,GO:0010287,GO:0004144,GO:0033306,GO:0019432	chloroplast|plastoglobule|diacylglycerol O-acyltransferase activity|phytol metabolic process|triglyceride biosynthetic process	-	-
circRNA_0364|NW_021318618.1:4970732_4972428_-	NW_021318618.1	-	4970732	4972428	1697	235	sense-overlapping	XM_028692142.1	NW_021318618.1:4944611_5011043_-	2337	110113418	LOC110113418	serine protease SPPA, chloroplastic	GO:0009507,GO:0009941,GO:0009570,GO:0009534,GO:0009535,GO:0016021,GO:0005739,GO:0004252,GO:0006508,GO:0006465	chloroplast|chloroplast envelope|chloroplast stroma|chloroplast thylakoid|chloroplast thylakoid membrane|integral component of membrane|mitochondrion|serine-type endopeptidase activity|proteolysis|signal peptide processing	-	-
circRNA_0365|NW_021318618.1:4984981_4985342_-	NW_021318618.1	-	4984981	4985342	362	275	sense-overlapping	XM_028692142.1	NW_021318618.1:4944611_5011043_-	2337	110113418	LOC110113418	serine protease SPPA, chloroplastic	GO:0009507,GO:0009941,GO:0009570,GO:0009534,GO:0009535,GO:0016021,GO:0005739,GO:0004252,GO:0006508,GO:0006465	chloroplast|chloroplast envelope|chloroplast stroma|chloroplast thylakoid|chloroplast thylakoid membrane|integral component of membrane|mitochondrion|serine-type endopeptidase activity|proteolysis|signal peptide processing	-	-
circRNA_0366|NW_021318618.1:4984981_4993552_-	NW_021318618.1	-	4984981	4993552	8572	413	sense-overlapping	XM_028692142.1	NW_021318618.1:4944611_5011043_-	2337	110113418	LOC110113418	serine protease SPPA, chloroplastic	GO:0009507,GO:0009941,GO:0009570,GO:0009534,GO:0009535,GO:0016021,GO:0005739,GO:0004252,GO:0006508,GO:0006465	chloroplast|chloroplast envelope|chloroplast stroma|chloroplast thylakoid|chloroplast thylakoid membrane|integral component of membrane|mitochondrion|serine-type endopeptidase activity|proteolysis|signal peptide processing	-	-
circRNA_0367|NW_021318618.1:5048891_5049385_+	NW_021318618.1	+	5048891	5049385	495	133	sense-overlapping	XM_020845978.2	NW_021318618.1:5029339_5115921_+	3042	110113405	LOC110113405	kanadaptin	GO:0003729,GO:0004864	mRNA binding|protein phosphatase inhibitor activity	-	-
circRNA_0368|NW_021318618.1:5061942_5078315_+	NW_021318618.1	+	5061942	5078315	16374	295	sense-overlapping	XM_020845978.2	NW_021318618.1:5029339_5115921_+	3042	110113405	LOC110113405	kanadaptin	GO:0003729,GO:0004864	mRNA binding|protein phosphatase inhibitor activity	-	-
circRNA_0369|NW_021318618.1:5077450_5078315_+	NW_021318618.1	+	5077450	5078315	866	246	sense-overlapping	XM_020845978.2	NW_021318618.1:5029339_5115921_+	3042	110113405	LOC110113405	kanadaptin	GO:0003729,GO:0004864	mRNA binding|protein phosphatase inhibitor activity	-	-
circRNA_0370|NW_021318618.1:5077450_5091166_+	NW_021318618.1	+	5077450	5091166	13717	491	sense-overlapping	XM_020845978.2	NW_021318618.1:5029339_5115921_+	3042	110113405	LOC110113405	kanadaptin	GO:0003729,GO:0004864	mRNA binding|protein phosphatase inhibitor activity	-	-
circRNA_0371|NW_021318618.1:5164387_5177012_-	NW_021318618.1	-	5164387	5177012	12626	330	sense-overlapping	XM_020845980.2	NW_021318618.1:5141159_5225444_-	4064	110113406	LOC110113406	DNA topoisomerase 1, transcript variant X2	GO:0005694,GO:0005634,GO:0003677,GO:0003916,GO:0003917,GO:0008270,GO:0006265	chromosome|nucleus|DNA binding|DNA topoisomerase activity|DNA topoisomerase type I (single strand cut, ATP-independent) activity|zinc ion binding|DNA topological change	-	-
circRNA_0372|NW_021318618.1:5164387_5180651_-	NW_021318618.1	-	5164387	5180651	16265	431	sense-overlapping	XM_020845980.2	NW_021318618.1:5141159_5225444_-	4064	110113406	LOC110113406	DNA topoisomerase 1, transcript variant X2	GO:0005694,GO:0005634,GO:0003677,GO:0003916,GO:0003917,GO:0008270,GO:0006265	chromosome|nucleus|DNA binding|DNA topoisomerase activity|DNA topoisomerase type I (single strand cut, ATP-independent) activity|zinc ion binding|DNA topological change	-	-
circRNA_0373|NW_021318618.1:5210009_5210660_-	NW_021318618.1	-	5210009	5210660	652	652	exonic	XM_020845980.2	NW_021318618.1:5141159_5225444_-	4064	110113406	LOC110113406	DNA topoisomerase 1, transcript variant X2	GO:0005694,GO:0005634,GO:0003677,GO:0003916,GO:0003917,GO:0008270,GO:0006265	chromosome|nucleus|DNA binding|DNA topoisomerase activity|DNA topoisomerase type I (single strand cut, ATP-independent) activity|zinc ion binding|DNA topological change	-	-
circRNA_0374|NW_021318618.1:5365703_5366377_-	NW_021318618.1	-	5365703	5366377	675	426	sense-overlapping	XM_020846043.2	NW_021318618.1:5318914_5417308_-	4021	110113448	LOC110113448	kinesin-like protein KIN-7I	GO:0005871,GO:0005874,GO:0005524,GO:0016887,GO:0008017,GO:0003777,GO:0007018	kinesin complex|microtubule|ATP binding|ATPase activity|microtubule binding|microtubule motor activity|microtubule-based movement	-	-
circRNA_0375|NW_021318618.1:5370460_5371279_-	NW_021318618.1	-	5370460	5371279	820	573	sense-overlapping	XM_020846043.2	NW_021318618.1:5318914_5417308_-	4021	110113448	LOC110113448	kinesin-like protein KIN-7I	GO:0005871,GO:0005874,GO:0005524,GO:0016887,GO:0008017,GO:0003777,GO:0007018	kinesin complex|microtubule|ATP binding|ATPase activity|microtubule binding|microtubule motor activity|microtubule-based movement	-	-
circRNA_0376|NW_021318618.1:5885335_5886181_-	NW_021318618.1	-	5885335	5886181	847	359	sense-overlapping	XM_028692225.1	NW_021318618.1:5883860_5915057_-	2931	110108225	LOC110108225	putative ion channel POLLUX-like 2, transcript variant X5	GO:0009507,GO:0009941,GO:0016021,GO:0009536	chloroplast|chloroplast envelope|integral component of membrane|plastid	-	-
circRNA_0377|NW_021318618.1:6102323_6103149_-	NW_021318618.1	-	6102323	6103149	827	667	sense-overlapping	XM_020822446.2	NW_021318618.1:6100649_6112766_-	1738	110096471	LOC110096471	ATP sulfurylase 1, chloroplastic-like	GO:0009507,GO:0009570,GO:0005524,GO:0004781,GO:0009970,GO:0070814,GO:0070206,GO:0000103	chloroplast|chloroplast stroma|ATP binding|sulfate adenylyltransferase (ATP) activity|cellular response to sulfate starvation|hydrogen sulfide biosynthetic process|protein trimerization|sulfate assimilation	path:dct00230,path:dct00261,path:dct00450,path:dct00920,path:dct01100,path:dct01110	Purine metabolism|Monobactam biosynthesis|Selenocompound metabolism|Sulfur metabolism|Metabolic pathways|Biosynthesis of secondary metabolites
circRNA_0378|NW_021318618.1:6585638_6586020_+	NW_021318618.1	+	6585638	6586020	383	297	sense-overlapping	XM_020820436.2	NW_021318618.1:6580423_6589844_+	2244	110095068	LOC110095068	calcium-dependent protein kinase 26-like	GO:0016020,GO:0005524,GO:0005509,GO:0004674	membrane|ATP binding|calcium ion binding|protein serine/threonine kinase activity	path:dct04626	Plant-pathogen interaction
circRNA_0379|NW_021318618.1:7218193_7223200_+	NW_021318618.1	+	7218193	7223200	5008	244	sense-overlapping	XM_020845875.2	NW_021318618.1:7177579_7224216_+	2029	110113330	LOC110113330	malonyl-CoA decarboxylase, mitochondrial, transcript variant X1	-	-	path:dct00410,path:dct00640,path:dct01100,path:dct04146	beta-Alanine metabolism|Propanoate metabolism|Metabolic pathways|Peroxisome
circRNA_0380|NW_021318618.1:7341798_7344041_-	NW_021318618.1	-	7341798	7344041	2244	580	sense-overlapping	XM_028692325.1	NW_021318618.1:7334243_7358529_-	2789	110113338	LOC110113338	histone-lysine N-methyltransferase EZ1, transcript variant X2	GO:0031519,GO:0018024	PcG protein complex|histone-lysine N-methyltransferase activity	-	-
circRNA_0381|NW_021318618.1:7608806_7609547_-	NW_021318618.1	-	7608806	7609547	742	329	sense-overlapping	XM_020845865.2	NW_021318618.1:7580522_7625995_-	1509	110113326	LOC110113326	cystathionine beta-lyase, chloroplastic, transcript variant X2	GO:0009507,GO:0009570,GO:0005737,GO:0016846,GO:0004121,GO:0004123,GO:0047804,GO:0030170,GO:0019343,GO:0019279,GO:0019346	chloroplast|chloroplast stroma|cytoplasm|carbon-sulfur lyase activity|cystathionine beta-lyase activity|cystathionine gamma-lyase activity|cysteine-S-conjugate beta-lyase activity|pyridoxal phosphate binding|cysteine biosynthetic process via cystathionine|L-methionine biosynthetic process from L-homoserine via cystathionine|transsulfuration	path:dct00270,path:dct00450,path:dct01100,path:dct01110,path:dct01230	Cysteine and methionine metabolism|Selenocompound metabolism|Metabolic pathways|Biosynthesis of secondary metabolites|Biosynthesis of amino acids
circRNA_0382|NW_021318618.1:8137529_8140240_-	NW_021318618.1	-	8137529	8140240	2712	870	sense-overlapping	XM_020825980.2	NW_021318618.1:8127892_8168805_-	2865	110098995	LOC110098995	cyclic nucleotide-gated ion channel 17	GO:0016021,GO:0005886,GO:0005516,GO:0030552,GO:0030553,GO:0005249	integral component of membrane|plasma membrane|calmodulin binding|cAMP binding|cGMP binding|voltage-gated potassium channel activity	path:dct04626	Plant-pathogen interaction
circRNA_0383|NW_021318618.1:8446347_8446660_+	NW_021318618.1	+	8446347	8446660	314	240	sense-overlapping	XM_028692444.1	NW_021318618.1:8442043_8451531_+	1423	110097875	LOC110097875	iron-sulfur assembly protein IscA-like 2, mitochondrial, transcript variant X3	GO:0005739,GO:0051537,GO:0051539,GO:0005506,GO:0005198,GO:0016226,GO:0051604,GO:0106035	mitochondrion|2 iron, 2 sulfur cluster binding|4 iron, 4 sulfur cluster binding|iron ion binding|structural molecule activity|iron-sulfur cluster assembly|protein maturation|protein maturation by [4Fe-4S] cluster transfer	-	-
circRNA_0384|NW_021318618.1:8586121_8586330_-	NW_021318618.1	-	8586121	8586330	210	210	exonic	XM_028692459.1	NW_021318618.1:8575145_8594721_-	1584	110097457	LOC110097457	polypyrimidine tract-binding protein homolog 1, transcript variant X2	GO:0005737,GO:0005634,GO:0000932,GO:0003723,GO:0006397,GO:0000381,GO:0043484,GO:0006417,GO:0008380,GO:0009845	cytoplasm|nucleus|P-body|RNA binding|mRNA processing|regulation of alternative mRNA splicing, via spliceosome|regulation of RNA splicing|regulation of translation|RNA splicing|seed germination	-	-
circRNA_0385|NW_021318618.1:8722859_8723149_-	NW_021318618.1	-	8722859	8723149	291	201	sense-overlapping	XM_020822787.2	NW_021318618.1:8696625_8740688_-	1674	110096702	LOC110096702	integrin-linked protein kinase 1, transcript variant X1	GO:0009898,GO:0005783,GO:0005789,GO:0005524,GO:0004672,GO:0004674,GO:0004712,GO:0045087,GO:0046777,GO:0006970	cytoplasmic side of plasma membrane|endoplasmic reticulum|endoplasmic reticulum membrane|ATP binding|protein kinase activity|protein serine/threonine kinase activity|protein serine/threonine/tyrosine kinase activity|innate immune response|protein autophosphorylation|response to osmotic stress	-	-
circRNA_0386|NW_021318618.1:8780709_8781303_-	NW_021318618.1	-	8780709	8781303	595	595	exonic	XM_028692510.1	NW_021318618.1:8771502_8833904_-	1684	110097946	LOC110097946	ubinuclein-1, transcript variant X2	GO:0005730,GO:0005634,GO:0030875,GO:0034728,GO:0060968,GO:0009651	nucleolus|nucleus|rDNA protrusion|nucleosome organization|regulation of gene silencing|response to salt stress	-	-
circRNA_0387|NW_021318618.1:9345361_9367130_-	NW_021318618.1	-	9345361	9367130	21770	383	sense-overlapping	XM_020849760.2	NW_021318618.1:9326078_9405341_-	2339	110116225	LOC110116225	RNA-binding protein 39	GO:0005634,GO:1990904,GO:0005681,GO:0003729,GO:0003723,GO:1990446,GO:0045292,GO:0006397	nucleus|ribonucleoprotein complex|spliceosomal complex|mRNA binding|RNA binding|U1 snRNP binding|mRNA cis splicing, via spliceosome|mRNA processing	-	-
circRNA_0388|NW_021318618.1:9359175_9359403_-	NW_021318618.1	-	9359175	9359403	229	229	exonic	XM_020849760.2	NW_021318618.1:9326078_9405341_-	2339	110116225	LOC110116225	RNA-binding protein 39	GO:0005634,GO:1990904,GO:0005681,GO:0003729,GO:0003723,GO:1990446,GO:0045292,GO:0006397	nucleus|ribonucleoprotein complex|spliceosomal complex|mRNA binding|RNA binding|U1 snRNP binding|mRNA cis splicing, via spliceosome|mRNA processing	-	-
circRNA_0389|NW_021318618.1:9359175_9367130_-	NW_021318618.1	-	9359175	9367130	7956	294	sense-overlapping	XM_020849760.2	NW_021318618.1:9326078_9405341_-	2339	110116225	LOC110116225	RNA-binding protein 39	GO:0005634,GO:1990904,GO:0005681,GO:0003729,GO:0003723,GO:1990446,GO:0045292,GO:0006397	nucleus|ribonucleoprotein complex|spliceosomal complex|mRNA binding|RNA binding|U1 snRNP binding|mRNA cis splicing, via spliceosome|mRNA processing	-	-
circRNA_0390|NW_021318618.1:11074935_11080477_-	NW_021318618.1	-	11074935	11080477	5543	409	sense-overlapping	XM_020822038.2	NW_021318618.1:11073635_11090084_-	1539	110096216	LOC110096216	bifunctional nuclease 2, transcript variant X1	GO:0005634,GO:0030891,GO:0004518,GO:0061630,GO:0016567	nucleus|VCB complex|nuclease activity|ubiquitin protein ligase activity|protein ubiquitination	-	-
circRNA_0391|NW_021318618.1:11074935_11081585_-	NW_021318618.1	-	11074935	11081585	6651	894	sense-overlapping	XM_020822038.2	NW_021318618.1:11073635_11090084_-	1539	110096216	LOC110096216	bifunctional nuclease 2, transcript variant X1	GO:0005634,GO:0030891,GO:0004518,GO:0061630,GO:0016567	nucleus|VCB complex|nuclease activity|ubiquitin protein ligase activity|protein ubiquitination	-	-
circRNA_0392|NW_021318618.1:11128782_11134618_-	NW_021318618.1	-	11128782	11134618	5837	246	sense-overlapping	XM_020822088.2	NW_021318618.1:11127361_11134812_-	1056	110096239	LOC110096239	serine/arginine-rich splicing factor SR45a	GO:0016607,GO:0005634,GO:1990904,GO:0005681,GO:0003723,GO:0006397,GO:0048026,GO:0043484,GO:0009644,GO:0008380	nuclear speck|nucleus|ribonucleoprotein complex|spliceosomal complex|RNA binding|mRNA processing|positive regulation of mRNA splicing, via spliceosome|regulation of RNA splicing|response to high light intensity|RNA splicing	path:dct03040	Spliceosome
circRNA_0393|NW_021318618.1:11298752_11299083_+	NW_021318618.1	+	11298752	11299083	332	237	sense-overlapping	XM_020822047.2	NW_021318618.1:11279824_11302669_+	1502	110096217	LOC110096217	uncharacterized LOC110096217, transcript variant X4	GO:0046872,GO:0003676,GO:0004523	metal ion binding|nucleic acid binding|RNA-DNA hybrid ribonuclease activity	-	-
circRNA_0394|NW_021318618.1:11335305_11342750_-	NW_021318618.1	-	11335305	11342750	7446	420	sense-overlapping	XM_028692598.1	NW_021318618.1:11326101_11351463_-	1678	110096218	LOC110096218	actin-related protein 4, transcript variant X3	GO:0005737,GO:0035267,GO:0005730,GO:0005634,GO:0016514,GO:0003682,GO:0005200,GO:0043044,GO:0006325,GO:0043967,GO:0048574,GO:0048235,GO:0006357	cytoplasm|NuA4 histone acetyltransferase complex|nucleolus|nucleus|SWI/SNF complex|chromatin binding|structural constituent of cytoskeleton|ATP-dependent chromatin remodeling|chromatin organization|histone H4 acetylation|long-day photoperiodism, flowering|pollen sperm cell differentiation|regulation of transcription by RNA polymerase II	-	-
circRNA_0395|NW_021318618.1:11390091_11392405_+	NW_021318618.1	+	11390091	11392405	2315	556	sense-overlapping	XM_020822061.2	NW_021318618.1:11377891_11394599_+	2566	110096221	LOC110096221	AUGMIN subunit 5, transcript variant X2	GO:0070652,GO:0009524,GO:0005876,GO:0051011,GO:0051301,GO:0051225	HAUS complex|phragmoplast|spindle microtubule|microtubule minus-end binding|cell division|spindle assembly	-	-
circRNA_0396|NW_021318618.1:11453405_11458643_+	NW_021318618.1	+	11453405	11458643	5239	300	sense-overlapping	XM_020822057.2	NW_021318618.1:11440348_11477198_+	2588	110096220	LOC110096220	transcription initiation factor TFIID subunit 5, transcript variant X2	GO:0005634	nucleus	path:dct03022	Basal transcription factors
circRNA_0397|NW_021318618.1:11521489_11521710_-	NW_021318618.1	-	11521489	11521710	222	134	sense-overlapping	XM_028691656.1	NW_021318618.1:11511394_11531841_-	804	110096234	LOC110096234	protein FMP32, mitochondrial-like	GO:0016021,GO:0005739,GO:0033617	integral component of membrane|mitochondrion|mitochondrial respiratory chain complex IV assembly	-	-
circRNA_0398|NW_021318618.1:11827516_11832987_+	NW_021318618.1	+	11827516	11832987	5472	321	sense-overlapping	XM_028692688.1	NW_021318618.1:11786553_11888334_+	5472	110096211	LOC110096211	UDP-glucose:glycoprotein glucosyltransferase	GO:0005783,GO:0005788,GO:0005739,GO:0003980,GO:0051082,GO:0046283,GO:0010204,GO:0071712,GO:0009626,GO:0018279,GO:0009751	endoplasmic reticulum|endoplasmic reticulum lumen|mitochondrion|UDP-glucose:glycoprotein glucosyltransferase activity|unfolded protein binding|anthocyanin-containing compound metabolic process|defense response signaling pathway, resistance gene-independent|ER-associated misfolded protein catabolic process|plant-type hypersensitive response|protein N-linked glycosylation via asparagine|response to…	path:dct04141	Protein processing in endoplasmic reticulum
circRNA_0399|NW_021318618.1:11827516_11859464_+	NW_021318618.1	+	11827516	11859464	31949	1196	sense-overlapping	XM_028692688.1	NW_021318618.1:11786553_11888334_+	5472	110096211	LOC110096211	UDP-glucose:glycoprotein glucosyltransferase	GO:0005783,GO:0005788,GO:0005739,GO:0003980,GO:0051082,GO:0046283,GO:0010204,GO:0071712,GO:0009626,GO:0018279,GO:0009751	endoplasmic reticulum|endoplasmic reticulum lumen|mitochondrion|UDP-glucose:glycoprotein glucosyltransferase activity|unfolded protein binding|anthocyanin-containing compound metabolic process|defense response signaling pathway, resistance gene-independent|ER-associated misfolded protein catabolic process|plant-type hypersensitive response|protein N-linked glycosylation via asparagine|response to…	path:dct04141	Protein processing in endoplasmic reticulum
circRNA_0400|NW_021318618.1:11859109_11873571_+	NW_021318618.1	+	11859109	11873571	14463	363	sense-overlapping	XM_028692688.1	NW_021318618.1:11786553_11888334_+	5472	110096211	LOC110096211	UDP-glucose:glycoprotein glucosyltransferase	GO:0005783,GO:0005788,GO:0005739,GO:0003980,GO:0051082,GO:0046283,GO:0010204,GO:0071712,GO:0009626,GO:0018279,GO:0009751	endoplasmic reticulum|endoplasmic reticulum lumen|mitochondrion|UDP-glucose:glycoprotein glucosyltransferase activity|unfolded protein binding|anthocyanin-containing compound metabolic process|defense response signaling pathway, resistance gene-independent|ER-associated misfolded protein catabolic process|plant-type hypersensitive response|protein N-linked glycosylation via asparagine|response to…	path:dct04141	Protein processing in endoplasmic reticulum
circRNA_0401|NW_021318619.1:783645_786427_+	NW_021318619.1	+	783645	786427	2783	475	sense-overlapping	XM_020826642.2	NW_021318619.1:758819_791268_+	3536	110099479	LOC110099479	lon protease homolog, mitochondrial, transcript variant X1	GO:0005759,GO:0005524,GO:0004176,GO:0043565,GO:0004252,GO:0003697,GO:0034599,GO:0051131,GO:0007005,GO:0070407,GO:0006515	mitochondrial matrix|ATP binding|ATP-dependent peptidase activity|sequence-specific DNA binding|serine-type endopeptidase activity|single-stranded DNA binding|cellular response to oxidative stress|chaperone-mediated protein complex assembly|mitochondrion organization|oxidation-dependent protein catabolic process|protein quality control for misfolded or incompletely synthesized proteins	-	-
circRNA_0402|NW_021318619.1:783645_796553_+	NW_021318619.1	+	783645	796553	12909	7360	sense-overlapping	XM_020826642.2	NW_021318619.1:758819_791268_+	3536	110099479	LOC110099479	lon protease homolog, mitochondrial, transcript variant X1	GO:0005759,GO:0005524,GO:0004176,GO:0043565,GO:0004252,GO:0003697,GO:0034599,GO:0051131,GO:0007005,GO:0070407,GO:0006515	mitochondrial matrix|ATP binding|ATP-dependent peptidase activity|sequence-specific DNA binding|serine-type endopeptidase activity|single-stranded DNA binding|cellular response to oxidative stress|chaperone-mediated protein complex assembly|mitochondrion organization|oxidation-dependent protein catabolic process|protein quality control for misfolded or incompletely synthesized proteins	-	-
circRNA_0403|NW_021318619.1:787108_813556_+	NW_021318619.1	+	787108	813556	26449	23720	sense-overlapping	XM_020826642.2	NW_021318619.1:758819_791268_+	3536	110099479	LOC110099479	lon protease homolog, mitochondrial, transcript variant X1	GO:0005759,GO:0005524,GO:0004176,GO:0043565,GO:0004252,GO:0003697,GO:0034599,GO:0051131,GO:0007005,GO:0070407,GO:0006515	mitochondrial matrix|ATP binding|ATP-dependent peptidase activity|sequence-specific DNA binding|serine-type endopeptidase activity|single-stranded DNA binding|cellular response to oxidative stress|chaperone-mediated protein complex assembly|mitochondrion organization|oxidation-dependent protein catabolic process|protein quality control for misfolded or incompletely synthesized proteins	-	-
circRNA_0404|NW_021318619.1:890858_901938_-	NW_021318619.1	-	890858	901938	11081	502	sense-overlapping	XM_020826641.2	NW_021318619.1:890561_905993_-	1221	110099478	LOC110099478	DNA replication complex GINS protein SLD5, transcript variant X1	GO:0005634,GO:0007059,GO:0006261	nucleus|chromosome segregation|DNA-dependent DNA replication	-	-
circRNA_0405|NW_021318619.1:901464_901938_-	NW_021318619.1	-	901464	901938	475	313	sense-overlapping	XM_020826641.2	NW_021318619.1:890561_905993_-	1221	110099478	LOC110099478	DNA replication complex GINS protein SLD5, transcript variant X1	GO:0005634,GO:0007059,GO:0006261	nucleus|chromosome segregation|DNA-dependent DNA replication	-	-
circRNA_0406|NW_021318619.1:913779_914368_-	NW_021318619.1	-	913779	914368	590	300	sense-overlapping	XM_020826632.2	NW_021318619.1:907849_968867_-	2876	110099472	LOC110099472	RGS domain-containing serine/threonine-protein kinase A, transcript variant X2	GO:0005829,GO:0005769,GO:0005783,GO:0005768,GO:0005634,GO:0005886,GO:0005802,GO:0012510,GO:0005524,GO:0016301,GO:0004709,GO:0004712,GO:0009738,GO:0008219,GO:0002229,GO:0009873,GO:0000165,GO:0009788,GO:0046777,GO:1900424,GO:1900150,GO:2000031,GO:0009617,GO:0009723,GO:0009620,GO:0009414	cytosol|early endosome|endoplasmic reticulum|endosome|nucleus|plasma membrane|trans-Golgi network|trans-Golgi network transport vesicle membrane|ATP binding|kinase activity|MAP kinase kinase kinase activity|protein serine/threonine/tyrosine kinase activity|abscisic acid-activated signaling pathway|cell death|defense response to oomycetes|ethylene-activated signaling pathway|MAPK cascade|negative …	-	-
circRNA_0407|NW_021318619.1:913779_930102_-	NW_021318619.1	-	913779	930102	16324	379	sense-overlapping	XM_020826632.2	NW_021318619.1:907849_968867_-	2876	110099472	LOC110099472	RGS domain-containing serine/threonine-protein kinase A, transcript variant X2	GO:0005829,GO:0005769,GO:0005783,GO:0005768,GO:0005634,GO:0005886,GO:0005802,GO:0012510,GO:0005524,GO:0016301,GO:0004709,GO:0004712,GO:0009738,GO:0008219,GO:0002229,GO:0009873,GO:0000165,GO:0009788,GO:0046777,GO:1900424,GO:1900150,GO:2000031,GO:0009617,GO:0009723,GO:0009620,GO:0009414	cytosol|early endosome|endoplasmic reticulum|endosome|nucleus|plasma membrane|trans-Golgi network|trans-Golgi network transport vesicle membrane|ATP binding|kinase activity|MAP kinase kinase kinase activity|protein serine/threonine/tyrosine kinase activity|abscisic acid-activated signaling pathway|cell death|defense response to oomycetes|ethylene-activated signaling pathway|MAPK cascade|negative …	-	-
circRNA_0408|NW_021318619.1:1311649_1312817_-	NW_021318619.1	-	1311649	1312817	1169	210	sense-overlapping	XM_020847463.2	NW_021318619.1:1307430_1357396_-	1850	110114546	LOC110114546	histone acetyltransferase GCN5	GO:0000123,GO:0003677,GO:0010484,GO:0009908,GO:0044154,GO:0043970,GO:1904278,GO:0010321,GO:0009416,GO:0010015	histone acetyltransferase complex|DNA binding|H3 histone acetyltransferase activity|flower development|histone H3-K14 acetylation|histone H3-K9 acetylation|positive regulation of wax biosynthetic process|regulation of vegetative phase change|response to light stimulus|root morphogenesis	-	-
circRNA_0409|NW_021318619.1:1332282_1341155_-	NW_021318619.1	-	1332282	1341155	8874	144	sense-overlapping	XM_020847463.2	NW_021318619.1:1307430_1357396_-	1850	110114546	LOC110114546	histone acetyltransferase GCN5	GO:0000123,GO:0003677,GO:0010484,GO:0009908,GO:0044154,GO:0043970,GO:1904278,GO:0010321,GO:0009416,GO:0010015	histone acetyltransferase complex|DNA binding|H3 histone acetyltransferase activity|flower development|histone H3-K14 acetylation|histone H3-K9 acetylation|positive regulation of wax biosynthetic process|regulation of vegetative phase change|response to light stimulus|root morphogenesis	-	-
circRNA_0410|NW_021318619.1:1332282_1349750_-	NW_021318619.1	-	1332282	1349750	17469	385	sense-overlapping	XM_020847463.2	NW_021318619.1:1307430_1357396_-	1850	110114546	LOC110114546	histone acetyltransferase GCN5	GO:0000123,GO:0003677,GO:0010484,GO:0009908,GO:0044154,GO:0043970,GO:1904278,GO:0010321,GO:0009416,GO:0010015	histone acetyltransferase complex|DNA binding|H3 histone acetyltransferase activity|flower development|histone H3-K14 acetylation|histone H3-K9 acetylation|positive regulation of wax biosynthetic process|regulation of vegetative phase change|response to light stimulus|root morphogenesis	-	-
circRNA_0411|NW_021318619.1:1478781_1485612_+	NW_021318619.1	+	1478781	1485612	6832	6832	intergenic
circRNA_0412|NW_021318619.1:1478781_1493037_+	NW_021318619.1	+	1478781	1493037	14257	9969	sense-overlapping	XM_028692822.1	NW_021318619.1:1488574_1551210_+	3963	110114537	LOC110114537	uncharacterized LOC110114537, transcript variant X1	-	-	-	-
circRNA_0413|NW_021318619.1:1484649_1485612_+	NW_021318619.1	+	1484649	1485612	964	964	intergenic
circRNA_0414|NW_021318619.1:1484649_1493037_+	NW_021318619.1	+	1484649	1493037	8389	4101	sense-overlapping	XM_028692822.1	NW_021318619.1:1488574_1551210_+	3963	110114537	LOC110114537	uncharacterized LOC110114537, transcript variant X1	-	-	-	-
circRNA_0415|NW_021318619.1:1516557_1517830_+	NW_021318619.1	+	1516557	1517830	1274	710	sense-overlapping	XM_028692822.1	NW_021318619.1:1488574_1551210_+	3963	110114537	LOC110114537	uncharacterized LOC110114537, transcript variant X1	-	-	-	-
circRNA_0416|NW_021318629.1:131239_131453_+	NW_021318629.1	+	131239	131453	215	215	exonic	XM_020843487.2	NW_021318629.1:63486_144744_+	7978	110111565	LOC110111565	serine/threonine-protein kinase TOR, transcript variant X1	GO:0005737,GO:0005634,GO:0005844,GO:0031931,GO:0031932,GO:0005524,GO:0042802,GO:0043621,GO:0004674,GO:0044877,GO:0044212,GO:0016311,GO:0009793,GO:0009630,GO:0010507,GO:0050687,GO:0016242,GO:0010116,GO:0010929,GO:1900459,GO:0030307,GO:0040019,GO:1902661,GO:2000234,GO:0045893,GO:0009733,GO:1901355,GO:0009615,GO:0009303,GO:0009745,GO:0038202	cytoplasm|nucleus|polysome|TORC1 complex|TORC2 complex|ATP binding|identical protein binding|protein self-association|protein serine/threonine kinase activity|protein-containing complex binding|transcription regulatory region DNA binding|dephosphorylation|embryo development ending in seed dormancy|gravitropism|negative regulation of autophagy|negative regulation of defense response to virus|negat…	path:dct04136	Autophagy - other
circRNA_0417|NW_021318629.1:208458_208722_-	NW_021318629.1	-	208458	208722	265	265	exonic	XM_020843504.2	NW_021318629.1:208458_289402_-	4139	110111577	LOC110111577	sodium/hydrogen exchanger 8, transcript variant X2	GO:0005623,GO:0009941,GO:0016021,GO:0005886,GO:0015386,GO:0015385,GO:0071805,GO:0051453,GO:2000377,GO:0042542,GO:0006979,GO:0000302,GO:0009651,GO:0098719,GO:0006814	cell|chloroplast envelope|integral component of membrane|plasma membrane|potassium:proton antiporter activity|sodium:proton antiporter activity|potassium ion transmembrane transport|regulation of intracellular pH|regulation of reactive oxygen species metabolic process|response to hydrogen peroxide|response to oxidative stress|response to reactive oxygen species|response to salt stress|sodium ion …	-	-
circRNA_0418|NW_021318629.1:213765_214994_-	NW_021318629.1	-	213765	214994	1230	656	sense-overlapping	XM_020843504.2	NW_021318629.1:208458_289402_-	4139	110111577	LOC110111577	sodium/hydrogen exchanger 8, transcript variant X2	GO:0005623,GO:0009941,GO:0016021,GO:0005886,GO:0015386,GO:0015385,GO:0071805,GO:0051453,GO:2000377,GO:0042542,GO:0006979,GO:0000302,GO:0009651,GO:0098719,GO:0006814	cell|chloroplast envelope|integral component of membrane|plasma membrane|potassium:proton antiporter activity|sodium:proton antiporter activity|potassium ion transmembrane transport|regulation of intracellular pH|regulation of reactive oxygen species metabolic process|response to hydrogen peroxide|response to oxidative stress|response to reactive oxygen species|response to salt stress|sodium ion …	-	-
circRNA_0419|NW_021318629.1:219061_223535_-	NW_021318629.1	-	219061	223535	4475	691	sense-overlapping	XM_020843504.2	NW_021318629.1:208458_289402_-	4139	110111577	LOC110111577	sodium/hydrogen exchanger 8, transcript variant X2	GO:0005623,GO:0009941,GO:0016021,GO:0005886,GO:0015386,GO:0015385,GO:0071805,GO:0051453,GO:2000377,GO:0042542,GO:0006979,GO:0000302,GO:0009651,GO:0098719,GO:0006814	cell|chloroplast envelope|integral component of membrane|plasma membrane|potassium:proton antiporter activity|sodium:proton antiporter activity|potassium ion transmembrane transport|regulation of intracellular pH|regulation of reactive oxygen species metabolic process|response to hydrogen peroxide|response to oxidative stress|response to reactive oxygen species|response to salt stress|sodium ion …	-	-
circRNA_0420|NW_021318629.1:282705_287270_-	NW_021318629.1	-	282705	287270	4566	379	sense-overlapping	XM_020843504.2	NW_021318629.1:208458_289402_-	4139	110111577	LOC110111577	sodium/hydrogen exchanger 8, transcript variant X2	GO:0005623,GO:0009941,GO:0016021,GO:0005886,GO:0015386,GO:0015385,GO:0071805,GO:0051453,GO:2000377,GO:0042542,GO:0006979,GO:0000302,GO:0009651,GO:0098719,GO:0006814	cell|chloroplast envelope|integral component of membrane|plasma membrane|potassium:proton antiporter activity|sodium:proton antiporter activity|potassium ion transmembrane transport|regulation of intracellular pH|regulation of reactive oxygen species metabolic process|response to hydrogen peroxide|response to oxidative stress|response to reactive oxygen species|response to salt stress|sodium ion …	-	-
circRNA_0421|NW_021318633.1:142847_143318_-	NW_021318633.1	-	142847	143318	472	266	sense-overlapping	XM_020836240.2	NW_021318633.1:132446_152774_-	940	110106359	LOC110106359	protein N-lysine methyltransferase METTL21A, transcript variant X1	GO:0005737,GO:0008168	cytoplasm|methyltransferase activity	-	-
circRNA_0422|NW_021318633.1:152305_152577_-	NW_021318633.1	-	152305	152577	273	188	sense-overlapping	XM_020836240.2	NW_021318633.1:132446_152774_-	940	110106359	LOC110106359	protein N-lysine methyltransferase METTL21A, transcript variant X1	GO:0005737,GO:0008168	cytoplasm|methyltransferase activity	-	-
circRNA_0423|NW_021318640.1:357177_370853_+	NW_021318640.1	+	357177	370853	13677	13677	sense-overlapping	XM_020844320.2	NW_021318640.1:342781_357557_+	791	110112188	LOC110112188	SKP1-like protein 1	GO:0005737,GO:0005829,GO:0005739,GO:0005634,GO:0009524,GO:0005886,GO:0005819,GO:0097602,GO:0009734,GO:0007059,GO:0009873,GO:0000226,GO:0007275,GO:0045910,GO:0016567,GO:0046686,GO:0031146,GO:0016032	cytoplasm|cytosol|mitochondrion|nucleus|phragmoplast|plasma membrane|spindle|cullin family protein binding|auxin-activated signaling pathway|chromosome segregation|ethylene-activated signaling pathway|microtubule cytoskeleton organization|multicellular organism development|negative regulation of DNA recombination|protein ubiquitination|response to cadmium ion|SCF-dependent proteasomal ubiquitin-d…	path:dct04120,path:dct04141	Ubiquitin mediated proteolysis|Protein processing in endoplasmic reticulum
circRNA_0424|NW_021318640.1:460354_462752_+	NW_021318640.1	+	460354	462752	2399	1989	sense-overlapping	XM_028692876.1	NW_021318640.1:447213_473769_+	5633	110112183	LOC110112183	E3 ubiquitin-protein ligase UPL3-like, transcript variant X9	GO:0005886,GO:0004842,GO:0042023,GO:0010091	plasma membrane|ubiquitin-protein transferase activity|DNA endoreduplication|trichome branching	path:dct04120	Ubiquitin mediated proteolysis
circRNA_0425|NW_021318640.1:510897_516414_+	NW_021318640.1	+	510897	516414	5518	922	sense-overlapping	XM_028692883.1	NW_021318640.1:490927_525881_+	1835	110112176	LOC110112176	cell cycle checkpoint protein RAD17, transcript variant X8	GO:0000790,GO:0005524,GO:0003682,GO:0006952,GO:0000077,GO:0006281,GO:0033314,GO:0031347,GO:0006282	nuclear chromatin|ATP binding|chromatin binding|defense response|DNA damage checkpoint|DNA repair|mitotic DNA replication checkpoint|regulation of defense response|regulation of DNA repair	-	-
circRNA_0426|NW_021318640.1:574110_578506_-	NW_021318640.1	-	574110	578506	4397	588	sense-overlapping	XM_020844297.2	NW_021318640.1:571811_612834_-	3360	110112175	LOC110112175	alpha-mannosidase	GO:0000326,GO:0004559,GO:0030246,GO:0046872,GO:0006013	protein storage vacuole|alpha-mannosidase activity|carbohydrate binding|metal ion binding|mannose metabolic process	path:dct00511	Other glycan degradation
circRNA_0427|NW_021318640.1:577432_578506_-	NW_021318640.1	-	577432	578506	1075	264	sense-overlapping	XM_020844297.2	NW_021318640.1:571811_612834_-	3360	110112175	LOC110112175	alpha-mannosidase	GO:0000326,GO:0004559,GO:0030246,GO:0046872,GO:0006013	protein storage vacuole|alpha-mannosidase activity|carbohydrate binding|metal ion binding|mannose metabolic process	path:dct00511	Other glycan degradation
circRNA_0428|NW_021318640.1:593421_595274_-	NW_021318640.1	-	593421	595274	1854	558	sense-overlapping	XM_020844297.2	NW_021318640.1:571811_612834_-	3360	110112175	LOC110112175	alpha-mannosidase	GO:0000326,GO:0004559,GO:0030246,GO:0046872,GO:0006013	protein storage vacuole|alpha-mannosidase activity|carbohydrate binding|metal ion binding|mannose metabolic process	path:dct00511	Other glycan degradation
circRNA_0429|NW_021318640.1:604250_605012_-	NW_021318640.1	-	604250	605012	763	453	sense-overlapping	XM_020844297.2	NW_021318640.1:571811_612834_-	3360	110112175	LOC110112175	alpha-mannosidase	GO:0000326,GO:0004559,GO:0030246,GO:0046872,GO:0006013	protein storage vacuole|alpha-mannosidase activity|carbohydrate binding|metal ion binding|mannose metabolic process	path:dct00511	Other glycan degradation
circRNA_0430|NW_021318640.1:721395_724291_+	NW_021318640.1	+	721395	724291	2897	430	sense-overlapping	XM_020844335.2	NW_021318640.1:716501_755942_+	1478	110112197	LOC110112197	electron transfer flavoprotein-ubiquinone oxidoreductase, mitochondrial, transcript variant X5	GO:0031305,GO:0051539,GO:0009055,GO:0004174,GO:0046872,GO:0048039,GO:0022904	integral component of mitochondrial inner membrane|4 iron, 4 sulfur cluster binding|electron transfer activity|electron-transferring-flavoprotein dehydrogenase activity|metal ion binding|ubiquinone binding|respiratory electron transport chain	-	-
circRNA_0431|NW_021318640.1:750948_751305_+	NW_021318640.1	+	750948	751305	358	185	sense-overlapping	XM_020844335.2	NW_021318640.1:716501_755942_+	1478	110112197	LOC110112197	electron transfer flavoprotein-ubiquinone oxidoreductase, mitochondrial, transcript variant X5	GO:0031305,GO:0051539,GO:0009055,GO:0004174,GO:0046872,GO:0048039,GO:0022904	integral component of mitochondrial inner membrane|4 iron, 4 sulfur cluster binding|electron transfer activity|electron-transferring-flavoprotein dehydrogenase activity|metal ion binding|ubiquinone binding|respiratory electron transport chain	-	-
circRNA_0432|NW_021318640.1:849117_861186_+	NW_021318640.1	+	849117	861186	12070	6863	sense-overlapping	XM_020844287.2	NW_021318640.1:846654_856199_+	2609	110112173	LOC110112173	prolyl endopeptidase-like	GO:0004252,GO:0070008	serine-type endopeptidase activity|serine-type exopeptidase activity	-	-
circRNA_0433|NW_021318640.1:855645_882407_+	NW_021318640.1	+	855645	882407	26763	6616	sense-overlapping	XM_020844323.2	NW_021318640.1:860026_885024_+	2627	110112191	LOC110112191	prolyl endopeptidase	GO:0004252,GO:0070008	serine-type endopeptidase activity|serine-type exopeptidase activity	-	-
circRNA_0434|NW_021318640.1:933627_933865_-	NW_021318640.1	-	933627	933865	239	126	sense-overlapping	XM_020844321.2	NW_021318640.1:929856_960673_-	4735	110112189	LOC110112189	carbon catabolite repressor protein 4 homolog 6-like	GO:0005737,GO:0005634,GO:0000175,GO:0046872,GO:0004535,GO:0003723	cytoplasm|nucleus|3'-5'-exoribonuclease activity|metal ion binding|poly(A)-specific ribonuclease activity|RNA binding	-	-
circRNA_0435|NW_021318645.1:98319_98637_-	NW_021318645.1	-	98319	98637	319	213	sense-overlapping	XM_020823526.2	NW_021318645.1:90218_105493_-	1733	110097257	LOC110097257	serine/threonine-protein kinase GRIK1	-	-	-	-
circRNA_0436|NW_021318645.1:123755_125760_+	NW_021318645.1	+	123755	125760	2006	672	sense-overlapping	XM_020823522.2	NW_021318645.1:114940_186384_+	2703	110097253	LOC110097253	protein VAC14 homolog	GO:0010008,GO:0000306,GO:0070772,GO:0006661	endosome membrane|extrinsic component of vacuolar membrane|PAS complex|phosphatidylinositol biosynthetic process	-	-
circRNA_0437|NW_021318645.1:125391_154576_+	NW_021318645.1	+	125391	154576	29186	963	sense-overlapping	XM_020823522.2	NW_021318645.1:114940_186384_+	2703	110097253	LOC110097253	protein VAC14 homolog	GO:0010008,GO:0000306,GO:0070772,GO:0006661	endosome membrane|extrinsic component of vacuolar membrane|PAS complex|phosphatidylinositol biosynthetic process	-	-
circRNA_0438|NW_021318645.1:125398_154576_+	NW_021318645.1	+	125398	154576	29179	956	sense-overlapping	XM_020823522.2	NW_021318645.1:114940_186384_+	2703	110097253	LOC110097253	protein VAC14 homolog	GO:0010008,GO:0000306,GO:0070772,GO:0006661	endosome membrane|extrinsic component of vacuolar membrane|PAS complex|phosphatidylinositol biosynthetic process	-	-
circRNA_0439|NW_021318645.1:153747_154576_+	NW_021318645.1	+	153747	154576	830	528	sense-overlapping	XM_020823522.2	NW_021318645.1:114940_186384_+	2703	110097253	LOC110097253	protein VAC14 homolog	GO:0010008,GO:0000306,GO:0070772,GO:0006661	endosome membrane|extrinsic component of vacuolar membrane|PAS complex|phosphatidylinositol biosynthetic process	-	-
circRNA_0440|NW_021318645.1:237173_237639_+	NW_021318645.1	+	237173	237639	467	354	sense-overlapping	XM_020823514.2	NW_021318645.1:217584_332527_+	4608	110097248	LOC110097248	transcription initiation factor TFIID subunit 2, transcript variant X1	GO:0009506,GO:0005669,GO:0003682,GO:0008237,GO:0044212,GO:0008270,GO:0045944,GO:0006367	plasmodesma|transcription factor TFIID complex|chromatin binding|metallopeptidase activity|transcription regulatory region DNA binding|zinc ion binding|positive regulation of transcription by RNA polymerase II|transcription initiation from RNA polymerase II promoter	path:dct03022	Basal transcription factors
circRNA_0441|NW_021318645.1:237173_259236_+	NW_021318645.1	+	237173	259236	22064	711	sense-overlapping	XM_020823514.2	NW_021318645.1:217584_332527_+	4608	110097248	LOC110097248	transcription initiation factor TFIID subunit 2, transcript variant X1	GO:0009506,GO:0005669,GO:0003682,GO:0008237,GO:0044212,GO:0008270,GO:0045944,GO:0006367	plasmodesma|transcription factor TFIID complex|chromatin binding|metallopeptidase activity|transcription regulatory region DNA binding|zinc ion binding|positive regulation of transcription by RNA polymerase II|transcription initiation from RNA polymerase II promoter	path:dct03022	Basal transcription factors
circRNA_0442|NW_021318645.1:251509_259236_+	NW_021318645.1	+	251509	259236	7728	357	sense-overlapping	XM_020823514.2	NW_021318645.1:217584_332527_+	4608	110097248	LOC110097248	transcription initiation factor TFIID subunit 2, transcript variant X1	GO:0009506,GO:0005669,GO:0003682,GO:0008237,GO:0044212,GO:0008270,GO:0045944,GO:0006367	plasmodesma|transcription factor TFIID complex|chromatin binding|metallopeptidase activity|transcription regulatory region DNA binding|zinc ion binding|positive regulation of transcription by RNA polymerase II|transcription initiation from RNA polymerase II promoter	path:dct03022	Basal transcription factors
circRNA_0443|NW_021318645.1:251509_265229_+	NW_021318645.1	+	251509	265229	13721	426	sense-overlapping	XM_020823514.2	NW_021318645.1:217584_332527_+	4608	110097248	LOC110097248	transcription initiation factor TFIID subunit 2, transcript variant X1	GO:0009506,GO:0005669,GO:0003682,GO:0008237,GO:0044212,GO:0008270,GO:0045944,GO:0006367	plasmodesma|transcription factor TFIID complex|chromatin binding|metallopeptidase activity|transcription regulatory region DNA binding|zinc ion binding|positive regulation of transcription by RNA polymerase II|transcription initiation from RNA polymerase II promoter	path:dct03022	Basal transcription factors
circRNA_0444|NW_021318645.1:324694_325492_+	NW_021318645.1	+	324694	325492	799	503	sense-overlapping	XM_020823514.2	NW_021318645.1:217584_332527_+	4608	110097248	LOC110097248	transcription initiation factor TFIID subunit 2, transcript variant X1	GO:0009506,GO:0005669,GO:0003682,GO:0008237,GO:0044212,GO:0008270,GO:0045944,GO:0006367	plasmodesma|transcription factor TFIID complex|chromatin binding|metallopeptidase activity|transcription regulatory region DNA binding|zinc ion binding|positive regulation of transcription by RNA polymerase II|transcription initiation from RNA polymerase II promoter	path:dct03022	Basal transcription factors
circRNA_0445|NW_021318647.1:26047_26876_+	NW_021318647.1	+	26047	26876	830	493	sense-overlapping	XM_020826622.2	NW_021318647.1:15873_42346_+	2491	110099467	LOC110099467	DNA topoisomerase 6 subunit B, transcript variant X1	GO:0009330,GO:0005634,GO:0005524,GO:0003677,GO:0003918,GO:0042803,GO:0000902,GO:0042023,GO:0006265,GO:0007389,GO:0009741,GO:0010026	DNA topoisomerase type II (double strand cut, ATP-hydrolyzing) complex|nucleus|ATP binding|DNA binding|DNA topoisomerase type II (double strand cut, ATP-hydrolyzing) activity|protein homodimerization activity|cell morphogenesis|DNA endoreduplication|DNA topological change|pattern specification process|response to brassinosteroid|trichome differentiation	-	-
circRNA_0446|NW_021318647.1:26506_26876_+	NW_021318647.1	+	26506	26876	371	283	sense-overlapping	XM_020826622.2	NW_021318647.1:15873_42346_+	2491	110099467	LOC110099467	DNA topoisomerase 6 subunit B, transcript variant X1	GO:0009330,GO:0005634,GO:0005524,GO:0003677,GO:0003918,GO:0042803,GO:0000902,GO:0042023,GO:0006265,GO:0007389,GO:0009741,GO:0010026	DNA topoisomerase type II (double strand cut, ATP-hydrolyzing) complex|nucleus|ATP binding|DNA binding|DNA topoisomerase type II (double strand cut, ATP-hydrolyzing) activity|protein homodimerization activity|cell morphogenesis|DNA endoreduplication|DNA topological change|pattern specification process|response to brassinosteroid|trichome differentiation	-	-
circRNA_0447|NW_021318647.1:28685_40476_+	NW_021318647.1	+	28685	40476	11792	601	sense-overlapping	XM_020826622.2	NW_021318647.1:15873_42346_+	2491	110099467	LOC110099467	DNA topoisomerase 6 subunit B, transcript variant X1	GO:0009330,GO:0005634,GO:0005524,GO:0003677,GO:0003918,GO:0042803,GO:0000902,GO:0042023,GO:0006265,GO:0007389,GO:0009741,GO:0010026	DNA topoisomerase type II (double strand cut, ATP-hydrolyzing) complex|nucleus|ATP binding|DNA binding|DNA topoisomerase type II (double strand cut, ATP-hydrolyzing) activity|protein homodimerization activity|cell morphogenesis|DNA endoreduplication|DNA topological change|pattern specification process|response to brassinosteroid|trichome differentiation	-	-
circRNA_0448|NW_021318647.1:41122_42141_+	NW_021318647.1	+	41122	42141	1020	322	sense-overlapping	XM_020826622.2	NW_021318647.1:15873_42346_+	2491	110099467	LOC110099467	DNA topoisomerase 6 subunit B, transcript variant X1	GO:0009330,GO:0005634,GO:0005524,GO:0003677,GO:0003918,GO:0042803,GO:0000902,GO:0042023,GO:0006265,GO:0007389,GO:0009741,GO:0010026	DNA topoisomerase type II (double strand cut, ATP-hydrolyzing) complex|nucleus|ATP binding|DNA binding|DNA topoisomerase type II (double strand cut, ATP-hydrolyzing) activity|protein homodimerization activity|cell morphogenesis|DNA endoreduplication|DNA topological change|pattern specification process|response to brassinosteroid|trichome differentiation	-	-
circRNA_0449|NW_021318647.1:108211_110432_+	NW_021318647.1	+	108211	110432	2222	654	sense-overlapping	XM_020826613.2	NW_021318647.1:88558_120500_+	2750	110099460	LOC110099460	protein NEDD1, transcript variant X2	GO:0000777,GO:0005828,GO:0005635,GO:0009524,GO:0000919,GO:0009553,GO:0009555,GO:0032467,GO:0060236,GO:2000694	condensed chromosome kinetochore|kinetochore microtubule|nuclear envelope|phragmoplast|cell plate assembly|embryo sac development|pollen development|positive regulation of cytokinesis|regulation of mitotic spindle organization|regulation of phragmoplast microtubule organization	-	-
circRNA_0450|NW_021318647.1:515941_516453_+	NW_021318647.1	+	515941	516453	513	336	sense-overlapping	XM_020826619.2	NW_021318647.1:497903_548980_+	1466	110099466	LOC110099466	probable protein S-acyltransferase 17	GO:0030659,GO:0005783,GO:0005789,GO:0005794,GO:0016021,GO:0019706,GO:0018230,GO:0006612	cytoplasmic vesicle membrane|endoplasmic reticulum|endoplasmic reticulum membrane|Golgi apparatus|integral component of membrane|protein-cysteine S-palmitoyltransferase activity|peptidyl-L-cysteine S-palmitoylation|protein targeting to membrane	-	-
circRNA_0451|NW_021318647.1:515941_520921_+	NW_021318647.1	+	515941	520921	4981	389	sense-overlapping	XM_020826619.2	NW_021318647.1:497903_548980_+	1466	110099466	LOC110099466	probable protein S-acyltransferase 17	GO:0030659,GO:0005783,GO:0005789,GO:0005794,GO:0016021,GO:0019706,GO:0018230,GO:0006612	cytoplasmic vesicle membrane|endoplasmic reticulum|endoplasmic reticulum membrane|Golgi apparatus|integral component of membrane|protein-cysteine S-palmitoyltransferase activity|peptidyl-L-cysteine S-palmitoylation|protein targeting to membrane	-	-
circRNA_0452|NW_021318648.1:123534_123975_+	NW_021318648.1	+	123534	123975	442	332	sense-overlapping	XM_028692903.1	NW_021318648.1:102900_133574_+	1118	110096298	LOC110096298	chaperone protein dnaJ 10, transcript variant X4	-	-	-	-
circRNA_0453|NW_021318648.1:216260_216457_+	NW_021318648.1	+	216260	216457	198	198	exonic	XM_020822138.2	NW_021318648.1:212043_217793_+	1898	110096274	LOC110096274	heterogeneous nuclear ribonucleoprotein 1, transcript variant X1	GO:0005829,GO:0005634,GO:1990904,GO:0005681,GO:0003729,GO:0003723,GO:0006397,GO:0051028,GO:1901000,GO:2000070,GO:0008380,GO:0010228	cytosol|nucleus|ribonucleoprotein complex|spliceosomal complex|mRNA binding|RNA binding|mRNA processing|mRNA transport|regulation of response to salt stress|regulation of response to water deprivation|RNA splicing|vegetative to reproductive phase transition of meristem	path:dct03015	mRNA surveillance pathway
circRNA_0454|NW_021318648.1:284335_297131_-	NW_021318648.1	-	284335	297131	12797	568	sense-overlapping	XM_028692908.1	NW_021318648.1:232227_312198_-	5438	110096282	LOC110096282	uncharacterized LOC110096282, transcript variant X6	GO:0009501,GO:0009706,GO:0031972,GO:0005887,GO:0009306	amyloplast|chloroplast inner membrane|chloroplast intermembrane space|integral component of plasma membrane|protein secretion	-	-
circRNA_0455|NW_021318648.1:290818_297131_-	NW_021318648.1	-	290818	297131	6314	505	sense-overlapping	XM_028692908.1	NW_021318648.1:232227_312198_-	5438	110096282	LOC110096282	uncharacterized LOC110096282, transcript variant X6	GO:0009501,GO:0009706,GO:0031972,GO:0005887,GO:0009306	amyloplast|chloroplast inner membrane|chloroplast intermembrane space|integral component of plasma membrane|protein secretion	-	-
circRNA_0456|NW_021318648.1:296032_297131_-	NW_021318648.1	-	296032	297131	1100	364	sense-overlapping	XM_028692908.1	NW_021318648.1:232227_312198_-	5438	110096282	LOC110096282	uncharacterized LOC110096282, transcript variant X6	GO:0009501,GO:0009706,GO:0031972,GO:0005887,GO:0009306	amyloplast|chloroplast inner membrane|chloroplast intermembrane space|integral component of plasma membrane|protein secretion	-	-
circRNA_0457|NW_021318650.1:48761_56900_-	NW_021318650.1	-	48761	56900	8140	461	sense-overlapping	XM_020831517.2	NW_021318650.1:40371_84087_-	1564	110102986	LOC110102986	protein XAP5 CIRCADIAN TIMEKEEPER, transcript variant X1	GO:0005634,GO:0048511	nucleus|rhythmic process	-	-
circRNA_0458|NW_021318650.1:56067_56900_-	NW_021318650.1	-	56067	56900	834	395	sense-overlapping	XM_020831517.2	NW_021318650.1:40371_84087_-	1564	110102986	LOC110102986	protein XAP5 CIRCADIAN TIMEKEEPER, transcript variant X1	GO:0005634,GO:0048511	nucleus|rhythmic process	-	-
circRNA_0459|NW_021318650.1:56067_56909_-	NW_021318650.1	-	56067	56909	843	404	sense-overlapping	XM_020831517.2	NW_021318650.1:40371_84087_-	1564	110102986	LOC110102986	protein XAP5 CIRCADIAN TIMEKEEPER, transcript variant X1	GO:0005634,GO:0048511	nucleus|rhythmic process	-	-
circRNA_0460|NW_021318650.1:61977_62410_-	NW_021318650.1	-	61977	62410	434	244	sense-overlapping	XM_020831517.2	NW_021318650.1:40371_84087_-	1564	110102986	LOC110102986	protein XAP5 CIRCADIAN TIMEKEEPER, transcript variant X1	GO:0005634,GO:0048511	nucleus|rhythmic process	-	-
circRNA_0461|NW_021318650.1:304056_304759_-	NW_021318650.1	-	304056	304759	704	576	sense-overlapping	XM_028692926.1	NW_021318650.1:291517_326624_-	6170	110095903	LOC110095903	histone acetyltransferase HAC1, transcript variant X5	GO:0005634,GO:0004402,GO:0003712,GO:0008270,GO:0006355	nucleus|histone acetyltransferase activity|transcription coregulator activity|zinc ion binding|regulation of transcription, DNA-templated	-	-
circRNA_0462|NW_021318650.1:608824_619478_-	NW_021318650.1	-	608824	619478	10655	786	sense-overlapping	XM_028692931.1	NW_021318650.1:586339_632998_-	1894	110100251	LOC110100251	protein PECTIC ARABINOGALACTAN SYNTHESIS-RELATED, transcript variant X5	-	-	-	-
circRNA_0463|NW_021318650.1:896056_937583_-	NW_021318650.1	-	896056	937583	41528	18097	sense-overlapping	XM_020828019.2	NW_021318650.1:880812_963014_-	6154	110100489	LOC110100489	mediator of RNA polymerase II transcription subunit 15a-like	GO:0005759,GO:0004739,GO:0006086,GO:0006096	mitochondrial matrix|pyruvate dehydrogenase (acetyl-transferring) activity|acetyl-CoA biosynthetic process from pyruvate|glycolytic process	-	-
circRNA_0464|NW_021318650.1:1022258_1022819_-	NW_021318650.1	-	1022258	1022819	562	470	sense-overlapping	XM_020827996.2	NW_021318650.1:1017936_1050975_-	1760	110100472	LOC110100472	uncharacterized LOC110100472, transcript variant X1	-	-	-	-
circRNA_0465|NW_021318660.1:78577_78856_-	NW_021318660.1	-	78577	78856	280	280	intergenic
circRNA_0466|NW_021318660.1:109792_117384_+	NW_021318660.1	+	109792	117384	7593	263	sense-overlapping	XM_020819604.2	NW_021318660.1:102703_162758_+	3579	110094377	LOC110094377	kinesin-like protein KIN-7D, chloroplastic	GO:0009507,GO:0005871,GO:0005874,GO:0043531,GO:0005524,GO:0016887,GO:0000287,GO:0008017,GO:0003777,GO:0042803,GO:0007018	chloroplast|kinesin complex|microtubule|ADP binding|ATP binding|ATPase activity|magnesium ion binding|microtubule binding|microtubule motor activity|protein homodimerization activity|microtubule-based movement	-	-
circRNA_0467|NW_021318660.1:109792_128431_+	NW_021318660.1	+	109792	128431	18640	402	sense-overlapping	XM_020819604.2	NW_021318660.1:102703_162758_+	3579	110094377	LOC110094377	kinesin-like protein KIN-7D, chloroplastic	GO:0009507,GO:0005871,GO:0005874,GO:0043531,GO:0005524,GO:0016887,GO:0000287,GO:0008017,GO:0003777,GO:0042803,GO:0007018	chloroplast|kinesin complex|microtubule|ADP binding|ATP binding|ATPase activity|magnesium ion binding|microtubule binding|microtubule motor activity|protein homodimerization activity|microtubule-based movement	-	-
circRNA_0468|NW_021318661.1:588620_588996_-	NW_021318661.1	-	588620	588996	377	257	sense-overlapping	XM_020841884.2	NW_021318661.1:579767_599694_-	1866	110110418	LOC110110418	oligouridylate-binding protein 1-like, transcript variant X1	GO:0005634,GO:0003729,GO:0006397	nucleus|mRNA binding|mRNA processing	-	-
circRNA_0469|NW_021318661.1:588620_588999_-	NW_021318661.1	-	588620	588999	380	260	sense-overlapping	XM_020841884.2	NW_021318661.1:579767_599694_-	1866	110110418	LOC110110418	oligouridylate-binding protein 1-like, transcript variant X1	GO:0005634,GO:0003729,GO:0006397	nucleus|mRNA binding|mRNA processing	-	-
circRNA_0470|NW_021318661.1:601548_612881_-	NW_021318661.1	-	601548	612881	11334	11334	intergenic
circRNA_0471|NW_021318661.1:601880_613247_-	NW_021318661.1	-	601880	613247	11368	11368	intergenic
circRNA_0472|NW_021318661.1:643572_653892_-	NW_021318661.1	-	643572	653892	10321	280	sense-overlapping	XM_020841876.2	NW_021318661.1:643572_701674_-	2577	110110411	LOC110110411	von Willebrand factor A domain-containing protein DDB_G0292028, transcript variant X3	-	-	-	-
circRNA_0473|NW_021318661.1:643572_653951_-	NW_021318661.1	-	643572	653951	10380	339	sense-overlapping	XM_020841876.2	NW_021318661.1:643572_701674_-	2577	110110411	LOC110110411	von Willebrand factor A domain-containing protein DDB_G0292028, transcript variant X3	-	-	-	-
circRNA_0474|NW_021318661.1:643572_661406_-	NW_021318661.1	-	643572	661406	17835	440	sense-overlapping	XM_020841876.2	NW_021318661.1:643572_701674_-	2577	110110411	LOC110110411	von Willebrand factor A domain-containing protein DDB_G0292028, transcript variant X3	-	-	-	-
circRNA_0475|NW_021318661.1:648884_653951_-	NW_021318661.1	-	648884	653951	5068	246	sense-overlapping	XM_020841876.2	NW_021318661.1:643572_701674_-	2577	110110411	LOC110110411	von Willebrand factor A domain-containing protein DDB_G0292028, transcript variant X3	-	-	-	-
circRNA_0476|NW_021318661.1:693302_693926_-	NW_021318661.1	-	693302	693926	625	456	sense-overlapping	XM_020841876.2	NW_021318661.1:643572_701674_-	2577	110110411	LOC110110411	von Willebrand factor A domain-containing protein DDB_G0292028, transcript variant X3	-	-	-	-
circRNA_0477|NW_021318663.1:194065_194333_+	NW_021318663.1	+	194065	194333	269	183	sense-overlapping	XM_020831104.2	NW_021318663.1:189313_237678_+	3218	110102670	LOC110102670	synaptotagmin-4, transcript variant X1	GO:0012505,GO:0005783,GO:0016021,GO:0005886,GO:0009506,GO:0008289,GO:0046872,GO:0006869	endomembrane system|endoplasmic reticulum|integral component of membrane|plasma membrane|plasmodesma|lipid binding|metal ion binding|lipid transport	-	-
circRNA_0478|NW_021318663.1:218118_219067_+	NW_021318663.1	+	218118	219067	950	639	sense-overlapping	XM_020831104.2	NW_021318663.1:189313_237678_+	3218	110102670	LOC110102670	synaptotagmin-4, transcript variant X1	GO:0012505,GO:0005783,GO:0016021,GO:0005886,GO:0009506,GO:0008289,GO:0046872,GO:0006869	endomembrane system|endoplasmic reticulum|integral component of membrane|plasma membrane|plasmodesma|lipid binding|metal ion binding|lipid transport	-	-
circRNA_0479|NW_021318663.1:231074_231379_+	NW_021318663.1	+	231074	231379	306	306	exonic	XM_020831104.2	NW_021318663.1:189313_237678_+	3218	110102670	LOC110102670	synaptotagmin-4, transcript variant X1	GO:0012505,GO:0005783,GO:0016021,GO:0005886,GO:0009506,GO:0008289,GO:0046872,GO:0006869	endomembrane system|endoplasmic reticulum|integral component of membrane|plasma membrane|plasmodesma|lipid binding|metal ion binding|lipid transport	-	-
circRNA_0480|NW_021318663.1:364976_365588_+	NW_021318663.1	+	364976	365588	613	251	sense-overlapping	XM_020837372.2	NW_021318663.1:351264_375723_+	3226	110107186	LOC110107186	chaperone protein ClpB3, mitochondrial	GO:0005739,GO:0005524,GO:0019538,GO:0042026,GO:0009408	mitochondrion|ATP binding|protein metabolic process|protein refolding|response to heat	-	-
circRNA_0481|NW_021318665.1:1301150_1302665_+	NW_021318665.1	+	1301150	1302665	1516	799	sense-overlapping	XM_020826265.2	NW_021318665.1:1293008_1305111_+	1392	110099184	LOC110099184	pyruvate dehydrogenase (acetyl-transferring) kinase, mitochondrial	GO:0005829,GO:0005739,GO:0005524,GO:0009927,GO:0042803,GO:0004740,GO:0046777	cytosol|mitochondrion|ATP binding|histidine phosphotransfer kinase activity|protein homodimerization activity|pyruvate dehydrogenase (acetyl-transferring) kinase activity|protein autophosphorylation	-	-
circRNA_0482|NW_021318667.1:99946_100349_-	NW_021318667.1	-	99946	100349	404	242	sense-overlapping	XM_028692977.1	NW_021318667.1:99436_117040_-	721	110094108	LOC110094108	calmodulin, transcript variant X2	GO:0005509,GO:0019722,GO:0005513	calcium ion binding|calcium-mediated signaling|detection of calcium ion	-	-
circRNA_0483|NW_021318673.1:294880_295443_+	NW_021318673.1	+	294880	295443	564	159	sense-overlapping	XM_020830339.2	NW_021318673.1:289329_302398_+	1556	110102151	LOC110102151	alcohol dehydrogenase-like 7	GO:0005829,GO:0004024,GO:0051903,GO:0008270,GO:0046294	cytosol|alcohol dehydrogenase activity, zinc-dependent|S-(hydroxymethyl)glutathione dehydrogenase activity|zinc ion binding|formaldehyde catabolic process	path:dct00010,path:dct00071,path:dct00350,path:dct01100,path:dct01110,path:dct01200	Glycolysis / Gluconeogenesis|Fatty acid degradation|Tyrosine metabolism|Metabolic pathways|Biosynthesis of secondary metabolites|Carbon metabolism
circRNA_0484|NW_021318673.1:310148_310778_+	NW_021318673.1	+	310148	310778	631	390	sense-overlapping	XM_020830348.2	NW_021318673.1:304346_315388_+	1019	110102158	LOC110102158	cytochrome c oxidase subunit 6b-1	GO:0009535,GO:0005739,GO:0005634,GO:0009579,GO:0005507	chloroplast thylakoid membrane|mitochondrion|nucleus|thylakoid|copper ion binding	path:dct00190,path:dct01100	Oxidative phosphorylation|Metabolic pathways
circRNA_0485|NW_021318673.1:1601945_1602088_+	NW_021318673.1	+	1601945	1602088	144	144	antisense	XM_020829002.2	NW_021318673.1:1598334_1602274_-	1672	110101203	LOC110101203	cytochrome P450 90A1	GO:0016021,GO:0005886,GO:0080132,GO:0020037,GO:0005506,GO:0004497,GO:0016705,GO:0016132,GO:0010268,GO:0007275,GO:0055114,GO:0016125	integral component of membrane|plasma membrane|fatty acid alpha-hydroxylase activity|heme binding|iron ion binding|monooxygenase activity|oxidoreductase activity, acting on paired donors, with incorporation or reduction of molecular oxygen|brassinosteroid biosynthetic process|brassinosteroid homeostasis|multicellular organism development|oxidation-reduction process|sterol metabolic process	path:dct00905,path:dct01100,path:dct01110	Brassinosteroid biosynthesis|Metabolic pathways|Biosynthesis of secondary metabolites
circRNA_0486|NW_021318673.1:2656622_2657375_-	NW_021318673.1	-	2656622	2657375	754	647	sense-overlapping	XM_028693017.1	NW_021318673.1:2637040_2675543_-	3619	110114971	LOC110114971	regulator of telomere elongation helicase 1 homolog	GO:0005739,GO:0005634,GO:0051539,GO:0005524,GO:0003677,GO:0003678,GO:0070182,GO:0046872,GO:0032508,GO:0036297,GO:0043007,GO:0070716,GO:0045910,GO:1904430,GO:0009555,GO:0000725,GO:0010569,GO:0048364,GO:0090657	mitochondrion|nucleus|4 iron, 4 sulfur cluster binding|ATP binding|DNA binding|DNA helicase activity|DNA polymerase binding|metal ion binding|DNA duplex unwinding|interstrand cross-link repair|maintenance of rDNA|mismatch repair involved in maintenance of fidelity involved in DNA-dependent DNA replication|negative regulation of DNA recombination|negative regulation of t-circle formation|pollen de…	-	-
circRNA_0487|NW_021318673.1:2674987_2675543_-	NW_021318673.1	-	2674987	2675543	557	266	sense-overlapping	XM_028693017.1	NW_021318673.1:2637040_2675543_-	3619	110114971	LOC110114971	regulator of telomere elongation helicase 1 homolog	GO:0005739,GO:0005634,GO:0051539,GO:0005524,GO:0003677,GO:0003678,GO:0070182,GO:0046872,GO:0032508,GO:0036297,GO:0043007,GO:0070716,GO:0045910,GO:1904430,GO:0009555,GO:0000725,GO:0010569,GO:0048364,GO:0090657	mitochondrion|nucleus|4 iron, 4 sulfur cluster binding|ATP binding|DNA binding|DNA helicase activity|DNA polymerase binding|metal ion binding|DNA duplex unwinding|interstrand cross-link repair|maintenance of rDNA|mismatch repair involved in maintenance of fidelity involved in DNA-dependent DNA replication|negative regulation of DNA recombination|negative regulation of t-circle formation|pollen de…	-	-
circRNA_0488|NW_021318680.1:83775_85192_-	NW_021318680.1	-	83775	85192	1418	433	sense-overlapping	XM_028693030.1	NW_021318680.1:81986_114294_-	2205	110098283	LOC110098283	probable UDP-N-acetylglucosamine--peptide N-acetylglucosaminyltransferase SPINDLY	GO:0005737,GO:0005829,GO:0005634,GO:0016262,GO:0030154,GO:0009736,GO:0009908,GO:0009740,GO:0009938,GO:0006486,GO:2000377,GO:0048511	cytoplasm|cytosol|nucleus|protein N-acetylglucosaminyltransferase activity|cell differentiation|cytokinin-activated signaling pathway|flower development|gibberellic acid mediated signaling pathway|negative regulation of gibberellic acid mediated signaling pathway|protein glycosylation|regulation of reactive oxygen species metabolic process|rhythmic process	-	-
circRNA_0489|NW_021318680.1:84908_85192_-	NW_021318680.1	-	84908	85192	285	285	exonic	XM_028693030.1	NW_021318680.1:81986_114294_-	2205	110098283	LOC110098283	probable UDP-N-acetylglucosamine--peptide N-acetylglucosaminyltransferase SPINDLY	GO:0005737,GO:0005829,GO:0005634,GO:0016262,GO:0030154,GO:0009736,GO:0009908,GO:0009740,GO:0009938,GO:0006486,GO:2000377,GO:0048511	cytoplasm|cytosol|nucleus|protein N-acetylglucosaminyltransferase activity|cell differentiation|cytokinin-activated signaling pathway|flower development|gibberellic acid mediated signaling pathway|negative regulation of gibberellic acid mediated signaling pathway|protein glycosylation|regulation of reactive oxygen species metabolic process|rhythmic process	-	-
circRNA_0490|NW_021318680.1:84908_96943_-	NW_021318680.1	-	84908	96943	12036	467	sense-overlapping	XM_028693030.1	NW_021318680.1:81986_114294_-	2205	110098283	LOC110098283	probable UDP-N-acetylglucosamine--peptide N-acetylglucosaminyltransferase SPINDLY	GO:0005737,GO:0005829,GO:0005634,GO:0016262,GO:0030154,GO:0009736,GO:0009908,GO:0009740,GO:0009938,GO:0006486,GO:2000377,GO:0048511	cytoplasm|cytosol|nucleus|protein N-acetylglucosaminyltransferase activity|cell differentiation|cytokinin-activated signaling pathway|flower development|gibberellic acid mediated signaling pathway|negative regulation of gibberellic acid mediated signaling pathway|protein glycosylation|regulation of reactive oxygen species metabolic process|rhythmic process	-	-
circRNA_0491|NW_021318680.1:84908_100426_-	NW_021318680.1	-	84908	100426	15519	589	sense-overlapping	XM_028693030.1	NW_021318680.1:81986_114294_-	2205	110098283	LOC110098283	probable UDP-N-acetylglucosamine--peptide N-acetylglucosaminyltransferase SPINDLY	GO:0005737,GO:0005829,GO:0005634,GO:0016262,GO:0030154,GO:0009736,GO:0009908,GO:0009740,GO:0009938,GO:0006486,GO:2000377,GO:0048511	cytoplasm|cytosol|nucleus|protein N-acetylglucosaminyltransferase activity|cell differentiation|cytokinin-activated signaling pathway|flower development|gibberellic acid mediated signaling pathway|negative regulation of gibberellic acid mediated signaling pathway|protein glycosylation|regulation of reactive oxygen species metabolic process|rhythmic process	-	-
circRNA_0492|NW_021318680.1:96762_100426_-	NW_021318680.1	-	96762	100426	3665	304	sense-overlapping	XM_028693030.1	NW_021318680.1:81986_114294_-	2205	110098283	LOC110098283	probable UDP-N-acetylglucosamine--peptide N-acetylglucosaminyltransferase SPINDLY	GO:0005737,GO:0005829,GO:0005634,GO:0016262,GO:0030154,GO:0009736,GO:0009908,GO:0009740,GO:0009938,GO:0006486,GO:2000377,GO:0048511	cytoplasm|cytosol|nucleus|protein N-acetylglucosaminyltransferase activity|cell differentiation|cytokinin-activated signaling pathway|flower development|gibberellic acid mediated signaling pathway|negative regulation of gibberellic acid mediated signaling pathway|protein glycosylation|regulation of reactive oxygen species metabolic process|rhythmic process	-	-
circRNA_0493|NW_021318680.1:198027_198518_+	NW_021318680.1	+	198027	198518	492	492	sense-overlapping	XM_020825056.2	NW_021318680.1:175823_210498_+	1185	110098281	LOC110098281	exonuclease DPD1, chloroplastic/mitochondrial, transcript variant X6	GO:0009507,GO:0005739,GO:0009536,GO:0004527,GO:0046872,GO:0003676,GO:0000738	chloroplast|mitochondrion|plastid|exonuclease activity|metal ion binding|nucleic acid binding|DNA catabolic process, exonucleolytic	-	-
circRNA_0494|NW_021318680.1:251196_264254_-	NW_021318680.1	-	251196	264254	13059	185	sense-overlapping	XM_020825059.2	NW_021318680.1:250594_271133_-	1196	110098284	LOC110098284	2-C-methyl-D-erythritol 4-phosphate cytidylyltransferase, chloroplastic	GO:0009507,GO:0009570,GO:0050518,GO:0019288	chloroplast|chloroplast stroma|2-C-methyl-D-erythritol 4-phosphate cytidylyltransferase activity|isopentenyl diphosphate biosynthetic process, methylerythritol 4-phosphate pathway	path:dct00900,path:dct01100,path:dct01110	Terpenoid backbone biosynthesis|Metabolic pathways|Biosynthesis of secondary metabolites
circRNA_0495|NW_021318680.1:313635_314494_+	NW_021318680.1	+	313635	314494	860	860	intergenic
circRNA_0496|NW_021318682.1:218922_228094_+	NW_021318682.1	+	218922	228094	9173	648	sense-overlapping	XM_020827030.2	NW_021318682.1:213579_246775_+	3404	110099774	LOC110099774	B3 domain-containing protein Os07g0563300, transcript variant X1	GO:0005634,GO:0003677,GO:0008270	nucleus|DNA binding|zinc ion binding	-	-
circRNA_0497|NW_021318682.1:218922_236148_+	NW_021318682.1	+	218922	236148	17227	815	sense-overlapping	XM_020827030.2	NW_021318682.1:213579_246775_+	3404	110099774	LOC110099774	B3 domain-containing protein Os07g0563300, transcript variant X1	GO:0005634,GO:0003677,GO:0008270	nucleus|DNA binding|zinc ion binding	-	-
circRNA_0498|NW_021318682.1:227059_228094_+	NW_021318682.1	+	227059	228094	1036	473	sense-overlapping	XM_020827030.2	NW_021318682.1:213579_246775_+	3404	110099774	LOC110099774	B3 domain-containing protein Os07g0563300, transcript variant X1	GO:0005634,GO:0003677,GO:0008270	nucleus|DNA binding|zinc ion binding	-	-
circRNA_0499|NW_021318682.1:227059_233684_+	NW_021318682.1	+	227059	233684	6626	523	sense-overlapping	XM_020827030.2	NW_021318682.1:213579_246775_+	3404	110099774	LOC110099774	B3 domain-containing protein Os07g0563300, transcript variant X1	GO:0005634,GO:0003677,GO:0008270	nucleus|DNA binding|zinc ion binding	-	-
circRNA_0500|NW_021318682.1:227059_236148_+	NW_021318682.1	+	227059	236148	9090	640	sense-overlapping	XM_020827030.2	NW_021318682.1:213579_246775_+	3404	110099774	LOC110099774	B3 domain-containing protein Os07g0563300, transcript variant X1	GO:0005634,GO:0003677,GO:0008270	nucleus|DNA binding|zinc ion binding	-	-
circRNA_0501|NW_021318682.1:227702_228094_+	NW_021318682.1	+	227702	228094	393	393	exonic	XM_020827030.2	NW_021318682.1:213579_246775_+	3404	110099774	LOC110099774	B3 domain-containing protein Os07g0563300, transcript variant X1	GO:0005634,GO:0003677,GO:0008270	nucleus|DNA binding|zinc ion binding	-	-
circRNA_0502|NW_021318682.1:227702_233684_+	NW_021318682.1	+	227702	233684	5983	443	sense-overlapping	XM_020827030.2	NW_021318682.1:213579_246775_+	3404	110099774	LOC110099774	B3 domain-containing protein Os07g0563300, transcript variant X1	GO:0005634,GO:0003677,GO:0008270	nucleus|DNA binding|zinc ion binding	-	-
circRNA_0503|NW_021318682.1:233635_236148_+	NW_021318682.1	+	233635	236148	2514	167	sense-overlapping	XM_020827030.2	NW_021318682.1:213579_246775_+	3404	110099774	LOC110099774	B3 domain-containing protein Os07g0563300, transcript variant X1	GO:0005634,GO:0003677,GO:0008270	nucleus|DNA binding|zinc ion binding	-	-
circRNA_0504|NW_021318682.1:401597_406755_-	NW_021318682.1	-	401597	406755	5159	299	sense-overlapping	XM_020827068.2	NW_021318682.1:347714_421053_-	6085	110099786	LOC110099786	brefeldin A-inhibited guanine nucleotide-exchange protein 5, transcript variant X2	GO:0005829,GO:0005769,GO:0031901,GO:0005802,GO:0005086,GO:0042742,GO:0006897,GO:0006955,GO:0045087,GO:0015031,GO:0032012,GO:0016192,GO:0016032	cytosol|early endosome|early endosome membrane|trans-Golgi network|ARF guanyl-nucleotide exchange factor activity|defense response to bacterium|endocytosis|immune response|innate immune response|protein transport|regulation of ARF protein signal transduction|vesicle-mediated transport|viral process	-	-
circRNA_0505|NW_021318682.1:401597_444632_-	NW_021318682.1	-	401597	444632	43036	24309	sense-overlapping	XM_020827068.2	NW_021318682.1:347714_421053_-	6085	110099786	LOC110099786	brefeldin A-inhibited guanine nucleotide-exchange protein 5, transcript variant X2	GO:0005829,GO:0005769,GO:0031901,GO:0005802,GO:0005086,GO:0042742,GO:0006897,GO:0006955,GO:0045087,GO:0015031,GO:0032012,GO:0016192,GO:0016032	cytosol|early endosome|early endosome membrane|trans-Golgi network|ARF guanyl-nucleotide exchange factor activity|defense response to bacterium|endocytosis|immune response|innate immune response|protein transport|regulation of ARF protein signal transduction|vesicle-mediated transport|viral process	-	-
circRNA_0506|NW_021318682.1:420532_428086_-	NW_021318682.1	-	420532	428086	7555	7464	sense-overlapping	XM_020827068.2	NW_021318682.1:347714_421053_-	6085	110099786	LOC110099786	brefeldin A-inhibited guanine nucleotide-exchange protein 5, transcript variant X2	GO:0005829,GO:0005769,GO:0031901,GO:0005802,GO:0005086,GO:0042742,GO:0006897,GO:0006955,GO:0045087,GO:0015031,GO:0032012,GO:0016192,GO:0016032	cytosol|early endosome|early endosome membrane|trans-Golgi network|ARF guanyl-nucleotide exchange factor activity|defense response to bacterium|endocytosis|immune response|innate immune response|protein transport|regulation of ARF protein signal transduction|vesicle-mediated transport|viral process	-	-
circRNA_0507|NW_021318682.1:573440_573882_+	NW_021318682.1	+	573440	573882	443	351	sense-overlapping	XM_028693041.1	NW_021318682.1:570963_589271_+	1382	110099767	LOC110099767	peptidyl-prolyl cis-trans isomerase CYP37, chloroplastic	GO:0009507,GO:0009534,GO:0009543,GO:0009535,GO:0005829,GO:0009579,GO:0031977,GO:0003755	chloroplast|chloroplast thylakoid|chloroplast thylakoid lumen|chloroplast thylakoid membrane|cytosol|thylakoid|thylakoid lumen|peptidyl-prolyl cis-trans isomerase activity	-	-
circRNA_0508|NW_021318682.1:772756_777921_+	NW_021318682.1	+	772756	777921	5166	651	sense-overlapping	XM_020827015.2	NW_021318682.1:770553_785950_+	3368	110099760	LOC110099760	protein TRANSPARENT TESTA 9	GO:0036020,GO:0019898,GO:0005794,GO:0000139,GO:0016021,GO:0017137,GO:0009718,GO:0001708,GO:0016197,GO:0008333,GO:1903415,GO:0044090,GO:0016192	endolysosome membrane|extrinsic component of membrane|Golgi apparatus|Golgi membrane|integral component of membrane|Rab GTPase binding|anthocyanin-containing compound biosynthetic process|cell fate specification|endosomal transport|endosome to lysosome transport|flavonoid transport from endoplasmic reticulum to plant-type vacuole|positive regulation of vacuole organization|vesicle-mediated transp…	-	-
circRNA_0509|NW_021318682.1:777589_777921_+	NW_021318682.1	+	777589	777921	333	233	sense-overlapping	XM_020827015.2	NW_021318682.1:770553_785950_+	3368	110099760	LOC110099760	protein TRANSPARENT TESTA 9	GO:0036020,GO:0019898,GO:0005794,GO:0000139,GO:0016021,GO:0017137,GO:0009718,GO:0001708,GO:0016197,GO:0008333,GO:1903415,GO:0044090,GO:0016192	endolysosome membrane|extrinsic component of membrane|Golgi apparatus|Golgi membrane|integral component of membrane|Rab GTPase binding|anthocyanin-containing compound biosynthetic process|cell fate specification|endosomal transport|endosome to lysosome transport|flavonoid transport from endoplasmic reticulum to plant-type vacuole|positive regulation of vacuole organization|vesicle-mediated transp…	-	-
circRNA_0510|NW_021318682.1:1141590_1142148_-	NW_021318682.1	-	1141590	1142148	559	444	sense-overlapping	XM_020827074.2	NW_021318682.1:1137910_1171312_-	1789	110099791	LOC110099791	putative G3BP-like protein	GO:0005737,GO:0005829,GO:0005634,GO:0009536,GO:1990904,GO:0003729,GO:0031047,GO:0009737	cytoplasm|cytosol|nucleus|plastid|ribonucleoprotein complex|mRNA binding|gene silencing by RNA|response to abscisic acid	-	-
circRNA_0511|NW_021318685.1:41604_41916_+	NW_021318685.1	+	41604	41916	313	231	sense-overlapping	XM_028693057.1	NW_021318685.1:36594_70994_+	1753	110103040	LOC110103040	histone deacetylase 9	GO:0005737,GO:0000118,GO:0005634,GO:0004407,GO:0032041,GO:0043565,GO:0070932,GO:1990619,GO:0070933,GO:0010187,GO:0045944,GO:1900055	cytoplasm|histone deacetylase complex|nucleus|histone deacetylase activity|NAD-dependent histone deacetylase activity (H3-K14 specific)|sequence-specific DNA binding|histone H3 deacetylation|histone H3-K9 deacetylation|histone H4 deacetylation|negative regulation of seed germination|positive regulation of transcription by RNA polymerase II|regulation of leaf senescence	-	-
circRNA_0512|NW_021318685.1:41604_47408_+	NW_021318685.1	+	41604	47408	5805	590	sense-overlapping	XM_028693057.1	NW_021318685.1:36594_70994_+	1753	110103040	LOC110103040	histone deacetylase 9	GO:0005737,GO:0000118,GO:0005634,GO:0004407,GO:0032041,GO:0043565,GO:0070932,GO:1990619,GO:0070933,GO:0010187,GO:0045944,GO:1900055	cytoplasm|histone deacetylase complex|nucleus|histone deacetylase activity|NAD-dependent histone deacetylase activity (H3-K14 specific)|sequence-specific DNA binding|histone H3 deacetylation|histone H3-K9 deacetylation|histone H4 deacetylation|negative regulation of seed germination|positive regulation of transcription by RNA polymerase II|regulation of leaf senescence	-	-
circRNA_0513|NW_021318685.1:46810_47408_+	NW_021318685.1	+	46810	47408	599	359	sense-overlapping	XM_028693057.1	NW_021318685.1:36594_70994_+	1753	110103040	LOC110103040	histone deacetylase 9	GO:0005737,GO:0000118,GO:0005634,GO:0004407,GO:0032041,GO:0043565,GO:0070932,GO:1990619,GO:0070933,GO:0010187,GO:0045944,GO:1900055	cytoplasm|histone deacetylase complex|nucleus|histone deacetylase activity|NAD-dependent histone deacetylase activity (H3-K14 specific)|sequence-specific DNA binding|histone H3 deacetylation|histone H3-K9 deacetylation|histone H4 deacetylation|negative regulation of seed germination|positive regulation of transcription by RNA polymerase II|regulation of leaf senescence	-	-
circRNA_0514|NW_021318685.1:231113_241976_-	NW_021318685.1	-	231113	241976	10864	452	sense-overlapping	XM_020831587.2	NW_021318685.1:211511_259531_-	2689	110103041	LOC110103041	protein TIC 100	GO:0009507,GO:0009941,GO:0009706,GO:0009535,GO:0009536,GO:0008320,GO:0009658,GO:0009793,GO:0045037	chloroplast|chloroplast envelope|chloroplast inner membrane|chloroplast thylakoid membrane|plastid|protein transmembrane transporter activity|chloroplast organization|embryo development ending in seed dormancy|protein import into chloroplast stroma	-	-
circRNA_0515|NW_021318685.1:231113_241989_-	NW_021318685.1	-	231113	241989	10877	465	sense-overlapping	XM_020831587.2	NW_021318685.1:211511_259531_-	2689	110103041	LOC110103041	protein TIC 100	GO:0009507,GO:0009941,GO:0009706,GO:0009535,GO:0009536,GO:0008320,GO:0009658,GO:0009793,GO:0045037	chloroplast|chloroplast envelope|chloroplast inner membrane|chloroplast thylakoid membrane|plastid|protein transmembrane transporter activity|chloroplast organization|embryo development ending in seed dormancy|protein import into chloroplast stroma	-	-
circRNA_0516|NW_021318685.1:244779_254419_-	NW_021318685.1	-	244779	254419	9641	336	sense-overlapping	XM_020831587.2	NW_021318685.1:211511_259531_-	2689	110103041	LOC110103041	protein TIC 100	GO:0009507,GO:0009941,GO:0009706,GO:0009535,GO:0009536,GO:0008320,GO:0009658,GO:0009793,GO:0045037	chloroplast|chloroplast envelope|chloroplast inner membrane|chloroplast thylakoid membrane|plastid|protein transmembrane transporter activity|chloroplast organization|embryo development ending in seed dormancy|protein import into chloroplast stroma	-	-
circRNA_0517|NW_021318688.1:478909_479200_-	NW_021318688.1	-	478909	479200	292	168	sense-overlapping	XM_020839707.2	NW_021318688.1:456508_528542_-	1272	110108871	LOC110108871	uncharacterized LOC110108871, transcript variant X1	-	-	-	-
circRNA_0518|NW_021318688.1:478909_489464_-	NW_021318688.1	-	478909	489464	10556	314	sense-overlapping	XM_020839707.2	NW_021318688.1:456508_528542_-	1272	110108871	LOC110108871	uncharacterized LOC110108871, transcript variant X1	-	-	-	-
circRNA_0519|NW_021318689.1:495627_522679_-	NW_021318689.1	-	495627	522679	27053	429	sense-overlapping	XM_020841391.2	NW_021318689.1:494716_550668_-	1925	110110085	LOC110110085	SH3 domain-containing protein 2, transcript variant X1	GO:0030136,GO:0005783,GO:0005794,GO:0005634,GO:0005886	clathrin-coated vesicle|endoplasmic reticulum|Golgi apparatus|nucleus|plasma membrane	-	-
circRNA_0520|NW_021318693.1:1526334_1530604_+	NW_021318693.1	+	1526334	1530604	4271	123	sense-overlapping	XM_020820878.1	NW_021318693.1:1514892_1552023_+	1136	110095363	LOC110095363	proteasome subunit alpha type-2-B	GO:0005737,GO:0005829,GO:0005739,GO:0005634,GO:0000502,GO:0005839,GO:0019773,GO:0004175,GO:0004298,GO:0042742,GO:0010498,GO:0010499,GO:0043161	cytoplasm|cytosol|mitochondrion|nucleus|proteasome complex|proteasome core complex|proteasome core complex, alpha-subunit complex|endopeptidase activity|threonine-type endopeptidase activity|defense response to bacterium|proteasomal protein catabolic process|proteasomal ubiquitin-independent protein catabolic process|proteasome-mediated ubiquitin-dependent protein catabolic process	path:dct03050	Proteasome
circRNA_0521|NW_021318693.1:1526334_1539526_+	NW_021318693.1	+	1526334	1539526	13193	347	sense-overlapping	XM_020820878.1	NW_021318693.1:1514892_1552023_+	1136	110095363	LOC110095363	proteasome subunit alpha type-2-B	GO:0005737,GO:0005829,GO:0005739,GO:0005634,GO:0000502,GO:0005839,GO:0019773,GO:0004175,GO:0004298,GO:0042742,GO:0010498,GO:0010499,GO:0043161	cytoplasm|cytosol|mitochondrion|nucleus|proteasome complex|proteasome core complex|proteasome core complex, alpha-subunit complex|endopeptidase activity|threonine-type endopeptidase activity|defense response to bacterium|proteasomal protein catabolic process|proteasomal ubiquitin-independent protein catabolic process|proteasome-mediated ubiquitin-dependent protein catabolic process	path:dct03050	Proteasome
circRNA_0522|NW_021318693.1:1579434_1579818_+	NW_021318693.1	+	1579434	1579818	385	270	sense-overlapping	XM_028693102.1	NW_021318693.1:1561788_1652515_+	4225	110104186	LOC110104186	WD repeat-containing protein 11-like	-	-	-	-
circRNA_0523|NW_021318693.1:1595577_1606348_+	NW_021318693.1	+	1595577	1606348	10772	580	sense-overlapping	XM_028693102.1	NW_021318693.1:1561788_1652515_+	4225	110104186	LOC110104186	WD repeat-containing protein 11-like	-	-	-	-
circRNA_0524|NW_021318693.1:1602245_1606348_+	NW_021318693.1	+	1602245	1606348	4104	513	sense-overlapping	XM_028693102.1	NW_021318693.1:1561788_1652515_+	4225	110104186	LOC110104186	WD repeat-containing protein 11-like	-	-	-	-
circRNA_0525|NW_021318693.1:1602250_1606348_+	NW_021318693.1	+	1602250	1606348	4099	508	sense-overlapping	XM_028693102.1	NW_021318693.1:1561788_1652515_+	4225	110104186	LOC110104186	WD repeat-containing protein 11-like	-	-	-	-
circRNA_0526|NW_021318693.1:1607847_1620705_+	NW_021318693.1	+	1607847	1620705	12859	267	sense-overlapping	XM_028693102.1	NW_021318693.1:1561788_1652515_+	4225	110104186	LOC110104186	WD repeat-containing protein 11-like	-	-	-	-
circRNA_0527|NW_021318693.1:1607847_1633105_+	NW_021318693.1	+	1607847	1633105	25259	890	sense-overlapping	XM_028693102.1	NW_021318693.1:1561788_1652515_+	4225	110104186	LOC110104186	WD repeat-containing protein 11-like	-	-	-	-
circRNA_0528|NW_021318693.1:1742120_1743755_-	NW_021318693.1	-	1742120	1743755	1636	822	sense-overlapping	XM_020833187.2	NW_021318693.1:1727596_1791792_-	7165	110104194	LOC110104194	protein PHOTOPERIOD-INDEPENDENT EARLY FLOWERING 1, transcript variant X1	GO:0005618,GO:0016514,GO:0000812,GO:0005524,GO:0016887,GO:0003677,GO:0003678,GO:0042393,GO:0043044,GO:0030154,GO:0006338,GO:0042742,GO:0009908,GO:0016458,GO:0043486,GO:0046686	cell wall|SWI/SNF complex|Swr1 complex|ATP binding|ATPase activity|DNA binding|DNA helicase activity|histone binding|ATP-dependent chromatin remodeling|cell differentiation|chromatin remodeling|defense response to bacterium|flower development|gene silencing|histone exchange|response to cadmium ion	-	-
circRNA_0529|NW_021318693.1:1806782_1809201_-	NW_021318693.1	-	1806782	1809201	2420	363	sense-overlapping	XM_020833216.2	NW_021318693.1:1804789_1843122_-	2289	110104215	LOC110104215	putative ATPase N2B, transcript variant X1	GO:0005737,GO:0005739,GO:0005524,GO:0016887,GO:0016558,GO:0006515,GO:0051603	cytoplasm|mitochondrion|ATP binding|ATPase activity|protein import into peroxisome matrix|protein quality control for misfolded or incompletely synthesized proteins|proteolysis involved in cellular protein catabolic process	-	-
circRNA_0530|NW_021318693.1:1837989_1840067_-	NW_021318693.1	-	1837989	1840067	2079	506	sense-overlapping	XM_020833216.2	NW_021318693.1:1804789_1843122_-	2289	110104215	LOC110104215	putative ATPase N2B, transcript variant X1	GO:0005737,GO:0005739,GO:0005524,GO:0016887,GO:0016558,GO:0006515,GO:0051603	cytoplasm|mitochondrion|ATP binding|ATPase activity|protein import into peroxisome matrix|protein quality control for misfolded or incompletely synthesized proteins|proteolysis involved in cellular protein catabolic process	-	-
circRNA_0531|NW_021318693.1:1839691_1840067_-	NW_021318693.1	-	1839691	1840067	377	280	sense-overlapping	XM_020833216.2	NW_021318693.1:1804789_1843122_-	2289	110104215	LOC110104215	putative ATPase N2B, transcript variant X1	GO:0005737,GO:0005739,GO:0005524,GO:0016887,GO:0016558,GO:0006515,GO:0051603	cytoplasm|mitochondrion|ATP binding|ATPase activity|protein import into peroxisome matrix|protein quality control for misfolded or incompletely synthesized proteins|proteolysis involved in cellular protein catabolic process	-	-
circRNA_0532|NW_021318693.1:2439391_2439697_-	NW_021318693.1	-	2439391	2439697	307	221	sense-overlapping	XM_020833204.2	NW_021318693.1:2436761_2453018_-	1094	110104207	LOC110104207	pre-rRNA-processing protein ESF2, transcript variant X1	GO:0005730,GO:0001671,GO:0003723,GO:0000480,GO:0000447,GO:0000472,GO:0034462	nucleolus|ATPase activator activity|RNA binding|endonucleolytic cleavage in 5'-ETS of tricistronic rRNA transcript (SSU-rRNA, 5.8S rRNA, LSU-rRNA)|endonucleolytic cleavage in ITS1 to separate SSU-rRNA from 5.8S rRNA and LSU-rRNA from tricistronic rRNA transcript (SSU-rRNA, 5.8S rRNA, LSU-rRNA)|endonucleolytic cleavage to generate mature 5'-end of SSU-rRNA from (SSU-rRNA, 5.8S rRNA, LSU-rRNA)|smal…	-	-
circRNA_0533|NW_021318693.1:2978013_2978464_-	NW_021318693.1	-	2978013	2978464	452	295	sense-overlapping	XM_020849423.2	NW_021318693.1:2977909_2983706_-	763	110115998	LOC110115998	DCC family protein At1g52590, chloroplastic	GO:0010287	plastoglobule	-	-
circRNA_0534|NW_021318693.1:3635635_3635902_+	NW_021318693.1	+	3635635	3635902	268	135	sense-overlapping	XM_028693089.1	NW_021318693.1:3624346_3721533_+	1523	110098208	LOC110098208	CBL-interacting serine/threonine-protein kinase 24-like	GO:0005737,GO:0005634,GO:0009705,GO:0005524,GO:0004672,GO:0004674,GO:0035556,GO:0006468,GO:0009651	cytoplasm|nucleus|plant-type vacuole membrane|ATP binding|protein kinase activity|protein serine/threonine kinase activity|intracellular signal transduction|protein phosphorylation|response to salt stress	-	-
circRNA_0535|NW_021318693.1:3979351_3981162_-	NW_021318693.1	-	3979351	3981162	1812	420	sense-overlapping	XM_020824731.2	NW_021318693.1:3978751_4016492_-	5692	110098029	LOC110098029	clathrin heavy chain 1	GO:0009507,GO:0030132,GO:0030130,GO:0071439,GO:0005829,GO:0005794,GO:0005886,GO:0009506,GO:0032051,GO:0005198,GO:0006886,GO:0006898	chloroplast|clathrin coat of coated pit|clathrin coat of trans-Golgi network vesicle|clathrin complex|cytosol|Golgi apparatus|plasma membrane|plasmodesma|clathrin light chain binding|structural molecule activity|intracellular protein transport|receptor-mediated endocytosis	path:dct04144	Endocytosis
circRNA_0536|NW_021318693.1:3980977_3981162_-	NW_021318693.1	-	3980977	3981162	186	186	exonic	XM_020824731.2	NW_021318693.1:3978751_4016492_-	5692	110098029	LOC110098029	clathrin heavy chain 1	GO:0009507,GO:0030132,GO:0030130,GO:0071439,GO:0005829,GO:0005794,GO:0005886,GO:0009506,GO:0032051,GO:0005198,GO:0006886,GO:0006898	chloroplast|clathrin coat of coated pit|clathrin coat of trans-Golgi network vesicle|clathrin complex|cytosol|Golgi apparatus|plasma membrane|plasmodesma|clathrin light chain binding|structural molecule activity|intracellular protein transport|receptor-mediated endocytosis	path:dct04144	Endocytosis
circRNA_0537|NW_021318693.1:3981242_3981412_-	NW_021318693.1	-	3981242	3981412	171	171	exonic	XM_020824731.2	NW_021318693.1:3978751_4016492_-	5692	110098029	LOC110098029	clathrin heavy chain 1	GO:0009507,GO:0030132,GO:0030130,GO:0071439,GO:0005829,GO:0005794,GO:0005886,GO:0009506,GO:0032051,GO:0005198,GO:0006886,GO:0006898	chloroplast|clathrin coat of coated pit|clathrin coat of trans-Golgi network vesicle|clathrin complex|cytosol|Golgi apparatus|plasma membrane|plasmodesma|clathrin light chain binding|structural molecule activity|intracellular protein transport|receptor-mediated endocytosis	path:dct04144	Endocytosis
circRNA_0538|NW_021318693.1:4727247_4728493_-	NW_021318693.1	-	4727247	4728493	1247	446	sense-overlapping	XM_020824176.2	NW_021318693.1:4721435_4733686_-	1635	110097666	LOC110097666	protein TRIGALACTOSYLDIACYLGLYCEROL 2, chloroplastic, transcript variant X1	GO:0009507,GO:0009941,GO:0009706,GO:0005829,GO:0016021,GO:0009536,GO:0005319,GO:0005543,GO:0032365,GO:0006869	chloroplast|chloroplast envelope|chloroplast inner membrane|cytosol|integral component of membrane|plastid|lipid transporter activity|phospholipid binding|intracellular lipid transport|lipid transport	-	-
circRNA_0539|NW_021318693.1:4756033_4761569_+	NW_021318693.1	+	4756033	4761569	5537	438	sense-overlapping	XM_020824100.2	NW_021318693.1:4756033_4778805_+	2784	110097606	LOC110097606	transcription factor MYB3R-2	GO:0005634,GO:0043565,GO:1901002,GO:1902584,GO:0045893,GO:0009409	nucleus|sequence-specific DNA binding|positive regulation of response to salt stress|positive regulation of response to water deprivation|positive regulation of transcription, DNA-templated|response to cold	-	-
circRNA_0540|NW_021318693.1:4802996_4803599_-	NW_021318693.1	-	4802996	4803599	604	221	sense-overlapping	XM_020824133.2	NW_021318693.1:4796146_4813554_-	929	110097629	LOC110097629	DNA-directed RNA polymerase III subunit rpc8, transcript variant X1	GO:0005829,GO:0000790,GO:0005634,GO:0005666,GO:0003677,GO:0003899,GO:0006384	cytosol|nuclear chromatin|nucleus|RNA polymerase III complex|DNA binding|DNA-directed 5'-3' RNA polymerase activity|transcription initiation from RNA polymerase III promoter	path:dct03020	RNA polymerase
circRNA_0541|NW_021318693.1:4802996_4808671_-	NW_021318693.1	-	4802996	4808671	5676	521	sense-overlapping	XM_020824133.2	NW_021318693.1:4796146_4813554_-	929	110097629	LOC110097629	DNA-directed RNA polymerase III subunit rpc8, transcript variant X1	GO:0005829,GO:0000790,GO:0005634,GO:0005666,GO:0003677,GO:0003899,GO:0006384	cytosol|nuclear chromatin|nucleus|RNA polymerase III complex|DNA binding|DNA-directed 5'-3' RNA polymerase activity|transcription initiation from RNA polymerase III promoter	path:dct03020	RNA polymerase
circRNA_0542|NW_021318693.1:4842639_4843850_-	NW_021318693.1	-	4842639	4843850	1212	186	sense-overlapping	XM_020824051.2	NW_021318693.1:4838791_4853228_-	1295	110097578	LOC110097578	uncharacterized protein At5g02240	GO:0048046,GO:0009507,GO:0009570,GO:0005783,GO:0009579,GO:0005507,GO:0042742	apoplast|chloroplast|chloroplast stroma|endoplasmic reticulum|thylakoid|copper ion binding|defense response to bacterium	-	-
circRNA_0543|NW_021318693.1:5080633_5080900_-	NW_021318693.1	-	5080633	5080900	268	268	exonic	XM_020823969.2	NW_021318693.1:5060306_5085841_-	2771	110097537	LOC110097537	neutral ceramidase 2	GO:0005783,GO:0005576,GO:0005794,GO:0009506,GO:0102121,GO:0017040,GO:0046514,GO:0042759,GO:0046512	endoplasmic reticulum|extracellular region|Golgi apparatus|plasmodesma|ceramidase activity|N-acylsphingosine amidohydrolase activity|ceramide catabolic process|long-chain fatty acid biosynthetic process|sphingosine biosynthetic process	path:dct00600,path:dct01100	Sphingolipid metabolism|Metabolic pathways
circRNA_0544|NW_021318693.1:5112537_5130579_+	NW_021318693.1	+	5112537	5130579	18043	1522	sense-overlapping	XM_020823921.2	NW_021318693.1:5094492_5144273_+	3252	110097516	LOC110097516	translation initiation factor IF-2, transcript variant X1	GO:0005759,GO:0005739,GO:0005525,GO:0003924,GO:0003743,GO:0070124	mitochondrial matrix|mitochondrion|GTP binding|GTPase activity|translation initiation factor activity|mitochondrial translational initiation	-	-
circRNA_0545|NW_021318693.1:5510274_5510577_+	NW_021318693.1	+	5510274	5510577	304	234	sense-overlapping	XM_028693145.1	NW_021318693.1:5459737_5513340_+	2410	110104812	LOC110104812	nicotinate phosphoribosyltransferase 2	GO:0005829,GO:0046872,GO:0004516,GO:0004514,GO:0009435,GO:0034355	cytosol|metal ion binding|nicotinate phosphoribosyltransferase activity|nicotinate-nucleotide diphosphorylase (carboxylating) activity|NAD biosynthetic process|NAD salvage	path:dct00760,path:dct01100	Nicotinate and nicotinamide metabolism|Metabolic pathways
circRNA_0546|NW_021318693.1:5514335_5524308_-	NW_021318693.1	-	5514335	5524308	9974	4937	sense-overlapping	XM_020834039.2	NW_021318693.1:5513934_5520539_-	1439	110104789	LOC110104789	PI-PLC X domain-containing protein At5g67130-like, transcript variant X2	GO:0046658,GO:0005886,GO:0009536,GO:0008081,GO:0006629	anchored component of plasma membrane|plasma membrane|plastid|phosphoric diester hydrolase activity|lipid metabolic process	-	-
circRNA_0547|NW_021318693.1:5845756_5846263_-	NW_021318693.1	-	5845756	5846263	508	231	sense-overlapping	XM_020834047.2	NW_021318693.1:5806088_5895370_-	2782	110104796	LOC110104796	DExH-box ATP-dependent RNA helicase DExH7, chloroplastic-like, transcript variant X1	GO:0009507,GO:0005524,GO:0003723,GO:0003724	chloroplast|ATP binding|RNA binding|RNA helicase activity	-	-
circRNA_0548|NW_021318693.1:5868239_5878145_-	NW_021318693.1	-	5868239	5878145	9907	513	sense-overlapping	XM_020834047.2	NW_021318693.1:5806088_5895370_-	2782	110104796	LOC110104796	DExH-box ATP-dependent RNA helicase DExH7, chloroplastic-like, transcript variant X1	GO:0009507,GO:0005524,GO:0003723,GO:0003724	chloroplast|ATP binding|RNA binding|RNA helicase activity	-	-
circRNA_0549|NW_021318693.1:6861196_6867851_-	NW_021318693.1	-	6861196	6867851	6656	1040	sense-overlapping	XM_020850461.2	NW_021318693.1:6841504_6913903_-	4829	110116761	LOC110116761	uncharacterized LOC110116761	-	-	-	-
circRNA_0550|NW_021318693.1:6948483_6949141_+	NW_021318693.1	+	6948483	6949141	659	467	sense-overlapping	XM_028693154.1	NW_021318693.1:6936526_6957309_+	1074	110116762	LOC110116762	RNA-binding protein 1-like	GO:0016607,GO:0003723	nuclear speck|RNA binding	-	-
circRNA_0551|NW_021318693.1:6969492_6970256_+	NW_021318693.1	+	6969492	6970256	765	203	sense-overlapping	XM_020816123.2	NW_021318693.1:6969206_6982172_+	1364	110091867	LOC110091867	UBP1-associated proteins 1C, transcript variant X1	GO:0005634,GO:1990904,GO:0003729,GO:0003723,GO:0008270,GO:0006397	nucleus|ribonucleoprotein complex|mRNA binding|RNA binding|zinc ion binding|mRNA processing	-	-
circRNA_0552|NW_021318693.1:6981641_6981951_+	NW_021318693.1	+	6981641	6981951	311	230	sense-overlapping	XM_020816123.2	NW_021318693.1:6969206_6982172_+	1364	110091867	LOC110091867	UBP1-associated proteins 1C, transcript variant X1	GO:0005634,GO:1990904,GO:0003729,GO:0003723,GO:0008270,GO:0006397	nucleus|ribonucleoprotein complex|mRNA binding|RNA binding|zinc ion binding|mRNA processing	-	-
circRNA_0553|NW_021318693.1:9197629_9203062_-	NW_021318693.1	-	9197629	9203062	5434	450	sense-overlapping	XM_020836574.2	NW_021318693.1:9191263_9244120_-	2773	110106625	LOC110106625	uncharacterized LOC110106625, transcript variant X1	-	-	-	-
circRNA_0554|NW_021318693.1:9208336_9208646_-	NW_021318693.1	-	9208336	9208646	311	192	sense-overlapping	XM_020836574.2	NW_021318693.1:9191263_9244120_-	2773	110106625	LOC110106625	uncharacterized LOC110106625, transcript variant X1	-	-	-	-
circRNA_0555|NW_021318693.1:9215692_9216709_-	NW_021318693.1	-	9215692	9216709	1018	450	sense-overlapping	XM_020836574.2	NW_021318693.1:9191263_9244120_-	2773	110106625	LOC110106625	uncharacterized LOC110106625, transcript variant X1	-	-	-	-
circRNA_0556|NW_021318693.1:9490931_9491698_+	NW_021318693.1	+	9490931	9491698	768	345	sense-overlapping	XM_020816085.2	NW_021318693.1:9431055_9534790_+	2795	110091836	LOC110091836	serine/threonine-protein kinase BLUS1	GO:0005737,GO:0005829,GO:0005524,GO:0046872,GO:0004674,GO:0032147,GO:1902456,GO:0023014	cytoplasm|cytosol|ATP binding|metal ion binding|protein serine/threonine kinase activity|activation of protein kinase activity|regulation of stomatal opening|signal transduction by protein phosphorylation	-	-
circRNA_0557|NW_021318693.1:9490931_9513359_+	NW_021318693.1	+	9490931	9513359	22429	669	sense-overlapping	XM_020816085.2	NW_021318693.1:9431055_9534790_+	2795	110091836	LOC110091836	serine/threonine-protein kinase BLUS1	GO:0005737,GO:0005829,GO:0005524,GO:0046872,GO:0004674,GO:0032147,GO:1902456,GO:0023014	cytoplasm|cytosol|ATP binding|metal ion binding|protein serine/threonine kinase activity|activation of protein kinase activity|regulation of stomatal opening|signal transduction by protein phosphorylation	-	-
circRNA_0558|NW_021318693.1:9503298_9503709_+	NW_021318693.1	+	9503298	9503709	412	207	sense-overlapping	XM_020816085.2	NW_021318693.1:9431055_9534790_+	2795	110091836	LOC110091836	serine/threonine-protein kinase BLUS1	GO:0005737,GO:0005829,GO:0005524,GO:0046872,GO:0004674,GO:0032147,GO:1902456,GO:0023014	cytoplasm|cytosol|ATP binding|metal ion binding|protein serine/threonine kinase activity|activation of protein kinase activity|regulation of stomatal opening|signal transduction by protein phosphorylation	-	-
circRNA_0559|NW_021318693.1:9503298_9513359_+	NW_021318693.1	+	9503298	9513359	10062	324	sense-overlapping	XM_020816085.2	NW_021318693.1:9431055_9534790_+	2795	110091836	LOC110091836	serine/threonine-protein kinase BLUS1	GO:0005737,GO:0005829,GO:0005524,GO:0046872,GO:0004674,GO:0032147,GO:1902456,GO:0023014	cytoplasm|cytosol|ATP binding|metal ion binding|protein serine/threonine kinase activity|activation of protein kinase activity|regulation of stomatal opening|signal transduction by protein phosphorylation	-	-
circRNA_0560|NW_021318693.1:9720221_9720864_-	NW_021318693.1	-	9720221	9720864	644	560	sense-overlapping	XM_020816077.2	NW_021318693.1:9714856_9729816_-	3762	110091829	LOC110091829	2-oxoglutarate dehydrogenase, mitochondrial	GO:0042645,GO:0009353,GO:0005739,GO:0045252,GO:0004591,GO:0030976,GO:0006103,GO:0006099	mitochondrial nucleoid|mitochondrial oxoglutarate dehydrogenase complex|mitochondrion|oxoglutarate dehydrogenase complex|oxoglutarate dehydrogenase (succinyl-transferring) activity|thiamine pyrophosphate binding|2-oxoglutarate metabolic process|tricarboxylic acid cycle	path:dct00020,path:dct01100,path:dct01110,path:dct01200	Citrate cycle (TCA cycle)|Metabolic pathways|Biosynthesis of secondary metabolites|Carbon metabolism
circRNA_0561|NW_021318693.1:10154591_10155772_-	NW_021318693.1	-	10154591	10155772	1182	491	sense-overlapping	XM_020840440.2	NW_021318693.1:10148314_10194136_-	2621	110109385	LOC110109385	nucleolar protein 10, transcript variant X1	GO:0030686,GO:0005829,GO:0005730,GO:0005634,GO:0032040,GO:0000462,GO:0042274,GO:0006364	90S preribosome|cytosol|nucleolus|nucleus|small-subunit processome|maturation of SSU-rRNA from tricistronic rRNA transcript (SSU-rRNA, 5.8S rRNA, LSU-rRNA)|ribosomal small subunit biogenesis|rRNA processing	-	-
circRNA_0562|NW_021318693.1:10178516_10190110_-	NW_021318693.1	-	10178516	10190110	11595	533	sense-overlapping	XM_020840440.2	NW_021318693.1:10148314_10194136_-	2621	110109385	LOC110109385	nucleolar protein 10, transcript variant X1	GO:0030686,GO:0005829,GO:0005730,GO:0005634,GO:0032040,GO:0000462,GO:0042274,GO:0006364	90S preribosome|cytosol|nucleolus|nucleus|small-subunit processome|maturation of SSU-rRNA from tricistronic rRNA transcript (SSU-rRNA, 5.8S rRNA, LSU-rRNA)|ribosomal small subunit biogenesis|rRNA processing	-	-
circRNA_0563|NW_021318693.1:10219057_10223182_-	NW_021318693.1	-	10219057	10223182	4126	1326	sense-overlapping	XM_020840420.2	NW_021318693.1:10202216_10224517_-	2401	110109381	LOC110109381	WD repeat-containing protein 91 homolog, transcript variant X1	GO:0005634,GO:0048188,GO:0042393,GO:0008168,GO:0051568,GO:0010228	nucleus|Set1C/COMPASS complex|histone binding|methyltransferase activity|histone H3-K4 methylation|vegetative to reproductive phase transition of meristem	-	-
circRNA_0564|NW_021318693.1:10267017_10267305_+	NW_021318693.1	+	10267017	10267305	289	209	sense-overlapping	XM_020840437.2	NW_021318693.1:10257234_10324322_+	1591	110109384	LOC110109384	E3 ubiquitin-protein ligase PRT1, transcript variant X1	GO:0005737,GO:0061630,GO:0008270,GO:0050832,GO:0043161,GO:0071596	cytoplasm|ubiquitin protein ligase activity|zinc ion binding|defense response to fungus|proteasome-mediated ubiquitin-dependent protein catabolic process|ubiquitin-dependent protein catabolic process via the N-end rule pathway	-	-
circRNA_0565|NW_021318693.1:10365098_10366239_+	NW_021318693.1	+	10365098	10366239	1142	600	sense-overlapping	XM_020840453.2	NW_021318693.1:10360987_10434972_+	3183	110109393	LOC110109393	DExH-box ATP-dependent RNA helicase DExH1, transcript variant X4	GO:0005634,GO:0005524,GO:0003723,GO:0003724	nucleus|ATP binding|RNA binding|RNA helicase activity	path:dct03018	RNA degradation
circRNA_0566|NW_021318693.1:10563541_10563821_-	NW_021318693.1	-	10563541	10563821	281	281	exonic	XM_028693171.1	NW_021318693.1:10563516_10585625_-	2237	110092861	LOC110092861	mediator of RNA polymerase II transcription subunit 23-like, transcript variant X2	GO:0016592,GO:0005667,GO:0010628,GO:0006357	mediator complex|transcription factor complex|positive regulation of gene expression|regulation of transcription by RNA polymerase II	-	-
circRNA_0567|NW_021318693.1:10671063_10671604_-	NW_021318693.1	-	10671063	10671604	542	350	sense-overlapping	XM_020820476.2	NW_021318693.1:10657403_10690290_-	1024	110095063	LOC110095063	ribonuclease H2 subunit A, transcript variant X6	GO:0032299,GO:0046872,GO:0003723,GO:0004523,GO:0043137,GO:0006298	ribonuclease H2 complex|metal ion binding|RNA binding|RNA-DNA hybrid ribonuclease activity|DNA replication, removal of RNA primer|mismatch repair	path:dct03030	DNA replication
circRNA_0568|NW_021318693.1:10916125_10945974_-	NW_021318693.1	-	10916125	10945974	29850	630	sense-overlapping	XM_028693179.1	NW_021318693.1:10859040_11036528_-	5764	110111639	LOC110111639	anaphase-promoting complex subunit 1, transcript variant X2	GO:0005680,GO:0031145,GO:0010252,GO:0051301,GO:0009793,GO:0009553,GO:0007091,GO:0048481,GO:0070979	anaphase-promoting complex|anaphase-promoting complex-dependent catabolic process|auxin homeostasis|cell division|embryo development ending in seed dormancy|embryo sac development|metaphase/anaphase transition of mitotic cell cycle|plant ovule development|protein K11-linked ubiquitination	path:dct04120	Ubiquitin mediated proteolysis
circRNA_0569|NW_021318693.1:10943356_10944766_-	NW_021318693.1	-	10943356	10944766	1411	393	sense-overlapping	XM_028693179.1	NW_021318693.1:10859040_11036528_-	5764	110111639	LOC110111639	anaphase-promoting complex subunit 1, transcript variant X2	GO:0005680,GO:0031145,GO:0010252,GO:0051301,GO:0009793,GO:0009553,GO:0007091,GO:0048481,GO:0070979	anaphase-promoting complex|anaphase-promoting complex-dependent catabolic process|auxin homeostasis|cell division|embryo development ending in seed dormancy|embryo sac development|metaphase/anaphase transition of mitotic cell cycle|plant ovule development|protein K11-linked ubiquitination	path:dct04120	Ubiquitin mediated proteolysis
circRNA_0570|NW_021318693.1:10943356_10945969_-	NW_021318693.1	-	10943356	10945969	2614	472	sense-overlapping	XM_028693179.1	NW_021318693.1:10859040_11036528_-	5764	110111639	LOC110111639	anaphase-promoting complex subunit 1, transcript variant X2	GO:0005680,GO:0031145,GO:0010252,GO:0051301,GO:0009793,GO:0009553,GO:0007091,GO:0048481,GO:0070979	anaphase-promoting complex|anaphase-promoting complex-dependent catabolic process|auxin homeostasis|cell division|embryo development ending in seed dormancy|embryo sac development|metaphase/anaphase transition of mitotic cell cycle|plant ovule development|protein K11-linked ubiquitination	path:dct04120	Ubiquitin mediated proteolysis
circRNA_0571|NW_021318693.1:10943356_10945974_-	NW_021318693.1	-	10943356	10945974	2619	477	sense-overlapping	XM_028693179.1	NW_021318693.1:10859040_11036528_-	5764	110111639	LOC110111639	anaphase-promoting complex subunit 1, transcript variant X2	GO:0005680,GO:0031145,GO:0010252,GO:0051301,GO:0009793,GO:0009553,GO:0007091,GO:0048481,GO:0070979	anaphase-promoting complex|anaphase-promoting complex-dependent catabolic process|auxin homeostasis|cell division|embryo development ending in seed dormancy|embryo sac development|metaphase/anaphase transition of mitotic cell cycle|plant ovule development|protein K11-linked ubiquitination	path:dct04120	Ubiquitin mediated proteolysis
circRNA_0572|NW_021318693.1:11128095_11130373_+	NW_021318693.1	+	11128095	11130373	2279	520	sense-overlapping	XM_020843601.2	NW_021318693.1:11098622_11162481_+	1643	110111644	LOC110111644	chlorophyll synthase, chloroplastic	GO:0031969,GO:0009534,GO:0016021,GO:0046408,GO:0015995	chloroplast membrane|chloroplast thylakoid|integral component of membrane|chlorophyll synthetase activity|chlorophyll biosynthetic process	path:dct00860,path:dct01100,path:dct01110	Porphyrin and chlorophyll metabolism|Metabolic pathways|Biosynthesis of secondary metabolites
circRNA_0573|NW_021318693.1:11553122_11553398_+	NW_021318693.1	+	11553122	11553398	277	142	sense-overlapping	XM_020836910.2	NW_021318693.1:11529947_11569678_+	1074	110106857	LOC110106857	truncated transcription factor CAULIFLOWER A, transcript variant X1	GO:0005634,GO:0003700,GO:0046983,GO:0000977,GO:0043565,GO:0008134,GO:0044212,GO:0030154,GO:0009908,GO:0007275,GO:0045944	nucleus|DNA-binding transcription factor activity|protein dimerization activity|RNA polymerase II regulatory region sequence-specific DNA binding|sequence-specific DNA binding|transcription factor binding|transcription regulatory region DNA binding|cell differentiation|flower development|multicellular organism development|positive regulation of transcription by RNA polymerase II	-	-
circRNA_0574|NW_021318693.1:12084344_12092177_-	NW_021318693.1	-	12084344	12092177	7834	657	sense-overlapping	XM_028693207.1	NW_021318693.1:12074077_12141296_-	981	110100152	LOC110100152	exocyst complex component SEC6	GO:0005618,GO:0005856,GO:0005829,GO:0000145,GO:0070062,GO:0009524,GO:0005886,GO:0000149,GO:0051601,GO:0006887	cell wall|cytoskeleton|cytosol|exocyst|extracellular exosome|phragmoplast|plasma membrane|SNARE binding|exocyst localization|exocytosis	-	-
circRNA_0575|NW_021318693.1:12749276_12751063_-	NW_021318693.1	-	12749276	12751063	1788	1788	exonic	XM_020823349.2	NW_021318693.1:12749039_12797499_-	2851	110097109	LOC110097109	MAR-binding filament-like protein 1, transcript variant X1	GO:0016363,GO:0003677	nuclear matrix|DNA binding	-	-
circRNA_0576|NW_021318693.1:12949535_12949804_+	NW_021318693.1	+	12949535	12949804	270	270	exonic	XM_020823348.2	NW_021318693.1:12874750_12949855_+	1072	110097108	LOC110097108	fructose-bisphosphate aldolase 3, chloroplastic	GO:0009507,GO:0009570,GO:0009534,GO:0005829,GO:0005739,GO:0009536,GO:0010287,GO:0004332,GO:0030388,GO:0006094,GO:0006096,GO:0046686,GO:0006979	chloroplast|chloroplast stroma|chloroplast thylakoid|cytosol|mitochondrion|plastid|plastoglobule|fructose-bisphosphate aldolase activity|fructose 1,6-bisphosphate metabolic process|gluconeogenesis|glycolytic process|response to cadmium ion|response to oxidative stress	path:dct00010,path:dct00030,path:dct00051,path:dct00710,path:dct01100,path:dct01110,path:dct01200,path:dct01230	Glycolysis / Gluconeogenesis|Pentose phosphate pathway|Fructose and mannose metabolism|Carbon fixation in photosynthetic organisms|Metabolic pathways|Biosynthesis of secondary metabolites|Carbon metabolism|Biosynthesis of amino acids
circRNA_0577|NW_021318705.1:283014_283883_-	NW_021318705.1	-	283014	283883	870	267	sense-overlapping	XM_020820004.2	NW_021318705.1:268089_304302_-	3671	110094707	LOC110094707	histone-lysine N-methyltransferase ATX4	GO:0005634,GO:0018024,GO:0046872,GO:0051571	nucleus|histone-lysine N-methyltransferase activity|metal ion binding|positive regulation of histone H3-K4 methylation	-	-
circRNA_0578|NW_021318705.1:295808_297916_-	NW_021318705.1	-	295808	297916	2109	706	sense-overlapping	XM_020820004.2	NW_021318705.1:268089_304302_-	3671	110094707	LOC110094707	histone-lysine N-methyltransferase ATX4	GO:0005634,GO:0018024,GO:0046872,GO:0051571	nucleus|histone-lysine N-methyltransferase activity|metal ion binding|positive regulation of histone H3-K4 methylation	-	-
circRNA_0579|NW_021318705.1:414193_423477_-	NW_021318705.1	-	414193	423477	9285	347	sense-overlapping	XM_020819978.2	NW_021318705.1:404693_452640_-	3992	110094688	LOC110094688	RNA polymerase II C-terminal domain phosphatase-like 1	GO:0016607,GO:0005634,GO:0046872,GO:0016791,GO:0004721,GO:0004647,GO:0003723,GO:0008420,GO:0009738,GO:0070940,GO:0007275,GO:0045892,GO:0000184,GO:0009651,GO:0009611	nuclear speck|nucleus|metal ion binding|phosphatase activity|phosphoprotein phosphatase activity|phosphoserine phosphatase activity|RNA binding|RNA polymerase II CTD heptapeptide repeat phosphatase activity|abscisic acid-activated signaling pathway|dephosphorylation of RNA polymerase II C-terminal domain|multicellular organism development|negative regulation of transcription, DNA-templated|nuclea…	-	-
circRNA_0580|NW_021318705.1:550057_554983_+	NW_021318705.1	+	550057	554983	4927	606	sense-overlapping	XM_020819979.2	NW_021318705.1:491563_563041_+	4044	110094689	LOC110094689	mediator of RNA polymerase II transcription subunit 16, transcript variant X1	GO:0016592,GO:0005634,GO:0032922,GO:1901672,GO:1902066,GO:0010104,GO:2000022,GO:0048586,GO:2001009,GO:0006355,GO:0006970,GO:0048364	mediator complex|nucleus|circadian regulation of gene expression|positive regulation of systemic acquired resistance|regulation of cell wall pectin metabolic process|regulation of ethylene-activated signaling pathway|regulation of jasmonic acid mediated signaling pathway|regulation of long-day photoperiodism, flowering|regulation of plant-type cell wall cellulose biosynthetic process|regulation o…	-	-
circRNA_0581|NW_021318705.1:554553_554983_+	NW_021318705.1	+	554553	554983	431	431	exonic	XM_020819979.2	NW_021318705.1:491563_563041_+	4044	110094689	LOC110094689	mediator of RNA polymerase II transcription subunit 16, transcript variant X1	GO:0016592,GO:0005634,GO:0032922,GO:1901672,GO:1902066,GO:0010104,GO:2000022,GO:0048586,GO:2001009,GO:0006355,GO:0006970,GO:0048364	mediator complex|nucleus|circadian regulation of gene expression|positive regulation of systemic acquired resistance|regulation of cell wall pectin metabolic process|regulation of ethylene-activated signaling pathway|regulation of jasmonic acid mediated signaling pathway|regulation of long-day photoperiodism, flowering|regulation of plant-type cell wall cellulose biosynthetic process|regulation o…	-	-
circRNA_0582|NW_021318705.1:919491_919723_-	NW_021318705.1	-	919491	919723	233	233	exonic	XM_020819989.2	NW_021318705.1:915520_920663_-	3437	110094696	LOC110094696	homeobox-leucine zipper protein ROC5-like	GO:0005634,GO:0008289,GO:0043565,GO:0006355	nucleus|lipid binding|sequence-specific DNA binding|regulation of transcription, DNA-templated	-	-
circRNA_0583|NW_021318705.1:1453511_1454032_-	NW_021318705.1	-	1453511	1454032	522	254	sense-overlapping	XM_028693239.1	NW_021318705.1:1388264_1478561_-	3136	110094673	LOC110094673	serine/threonine-protein kinase 4-like, transcript variant X4	GO:0005737,GO:0005829,GO:0005524,GO:0046872,GO:0004674,GO:0032147,GO:1902456,GO:0023014	cytoplasm|cytosol|ATP binding|metal ion binding|protein serine/threonine kinase activity|activation of protein kinase activity|regulation of stomatal opening|signal transduction by protein phosphorylation	-	-
circRNA_0584|NW_021318705.1:1453511_1461186_-	NW_021318705.1	-	1453511	1461186	7676	560	sense-overlapping	XM_028693239.1	NW_021318705.1:1388264_1478561_-	3136	110094673	LOC110094673	serine/threonine-protein kinase 4-like, transcript variant X4	GO:0005737,GO:0005829,GO:0005524,GO:0046872,GO:0004674,GO:0032147,GO:1902456,GO:0023014	cytoplasm|cytosol|ATP binding|metal ion binding|protein serine/threonine kinase activity|activation of protein kinase activity|regulation of stomatal opening|signal transduction by protein phosphorylation	-	-
circRNA_0585|NW_021318705.1:1462526_1464357_-	NW_021318705.1	-	1462526	1464357	1832	507	sense-overlapping	XM_028693239.1	NW_021318705.1:1388264_1478561_-	3136	110094673	LOC110094673	serine/threonine-protein kinase 4-like, transcript variant X4	GO:0005737,GO:0005829,GO:0005524,GO:0046872,GO:0004674,GO:0032147,GO:1902456,GO:0023014	cytoplasm|cytosol|ATP binding|metal ion binding|protein serine/threonine kinase activity|activation of protein kinase activity|regulation of stomatal opening|signal transduction by protein phosphorylation	-	-
circRNA_0586|NW_021318705.1:1617763_1618137_+	NW_021318705.1	+	1617763	1618137	375	298	sense-overlapping	XM_020830290.2	NW_021318705.1:1596987_1623587_+	1001	110102110	LOC110102110	MOB kinase activator-like 1A	GO:0005737,GO:0005769,GO:0005634,GO:0009705,GO:0005886,GO:0005802,GO:0046872,GO:0009734,GO:0051301,GO:0008283,GO:0009553,GO:0048229,GO:0009554,GO:0009556,GO:0035265,GO:0048364,GO:0010449	cytoplasm|early endosome|nucleus|plant-type vacuole membrane|plasma membrane|trans-Golgi network|metal ion binding|auxin-activated signaling pathway|cell division|cell population proliferation|embryo sac development|gametophyte development|megasporogenesis|microsporogenesis|organ growth|root development|root meristem growth	-	-
circRNA_0587|NW_021318705.1:1707663_1708050_-	NW_021318705.1	-	1707663	1708050	388	275	sense-overlapping	XM_020830296.2	NW_021318705.1:1703433_1709813_-	1757	110102115	LOC110102115	uncharacterized zinc finger CCHC domain-containing protein At4g19190	GO:0046872,GO:0003714	metal ion binding|transcription corepressor activity	-	-
circRNA_0588|NW_021318705.1:1715923_1743887_-	NW_021318705.1	-	1715923	1743887	27965	1357	sense-overlapping	XM_020830262.2	NW_021318705.1:1715604_1762039_-	3636	110102089	LOC110102089	pre-mRNA-processing protein 40A, transcript variant X1	GO:0005829,GO:0016592,GO:0005685,GO:0071004,GO:0003723,GO:0045292,GO:0000398	cytosol|mediator complex|U1 snRNP|U2-type prespliceosome|RNA binding|mRNA cis splicing, via spliceosome|mRNA splicing, via spliceosome	path:dct03040	Spliceosome
circRNA_0589|NW_021318705.1:1727255_1727914_-	NW_021318705.1	-	1727255	1727914	660	276	sense-overlapping	XM_020830262.2	NW_021318705.1:1715604_1762039_-	3636	110102089	LOC110102089	pre-mRNA-processing protein 40A, transcript variant X1	GO:0005829,GO:0016592,GO:0005685,GO:0071004,GO:0003723,GO:0045292,GO:0000398	cytosol|mediator complex|U1 snRNP|U2-type prespliceosome|RNA binding|mRNA cis splicing, via spliceosome|mRNA splicing, via spliceosome	path:dct03040	Spliceosome
circRNA_0590|NW_021318705.1:1739799_1743887_-	NW_021318705.1	-	1739799	1743887	4089	585	sense-overlapping	XM_020830262.2	NW_021318705.1:1715604_1762039_-	3636	110102089	LOC110102089	pre-mRNA-processing protein 40A, transcript variant X1	GO:0005829,GO:0016592,GO:0005685,GO:0071004,GO:0003723,GO:0045292,GO:0000398	cytosol|mediator complex|U1 snRNP|U2-type prespliceosome|RNA binding|mRNA cis splicing, via spliceosome|mRNA splicing, via spliceosome	path:dct03040	Spliceosome
circRNA_0591|NW_021318705.1:1749814_1751829_-	NW_021318705.1	-	1749814	1751829	2016	564	sense-overlapping	XM_020830262.2	NW_021318705.1:1715604_1762039_-	3636	110102089	LOC110102089	pre-mRNA-processing protein 40A, transcript variant X1	GO:0005829,GO:0016592,GO:0005685,GO:0071004,GO:0003723,GO:0045292,GO:0000398	cytosol|mediator complex|U1 snRNP|U2-type prespliceosome|RNA binding|mRNA cis splicing, via spliceosome|mRNA splicing, via spliceosome	path:dct03040	Spliceosome
circRNA_0592|NW_021318705.1:1754722_1756641_-	NW_021318705.1	-	1754722	1756641	1920	723	sense-overlapping	XM_020830262.2	NW_021318705.1:1715604_1762039_-	3636	110102089	LOC110102089	pre-mRNA-processing protein 40A, transcript variant X1	GO:0005829,GO:0016592,GO:0005685,GO:0071004,GO:0003723,GO:0045292,GO:0000398	cytosol|mediator complex|U1 snRNP|U2-type prespliceosome|RNA binding|mRNA cis splicing, via spliceosome|mRNA splicing, via spliceosome	path:dct03040	Spliceosome
circRNA_0593|NW_021318705.1:1946740_1950893_-	NW_021318705.1	-	1946740	1950893	4154	543	sense-overlapping	XM_020830259.2	NW_021318705.1:1935200_1954384_-	2260	110102086	LOC110102086	protein FREE1, transcript variant X2	GO:0000813,GO:0031902,GO:0005634,GO:0046872,GO:0003729,GO:0043130,GO:0070676,GO:0055072,GO:0036258,GO:0015031	ESCRT I complex|late endosome membrane|nucleus|metal ion binding|mRNA binding|ubiquitin binding|intralumenal vesicle formation|iron ion homeostasis|multivesicular body assembly|protein transport	-	-
circRNA_0594|NW_021318705.1:1949935_1950893_-	NW_021318705.1	-	1949935	1950893	959	366	sense-overlapping	XM_020830259.2	NW_021318705.1:1935200_1954384_-	2260	110102086	LOC110102086	protein FREE1, transcript variant X2	GO:0000813,GO:0031902,GO:0005634,GO:0046872,GO:0003729,GO:0043130,GO:0070676,GO:0055072,GO:0036258,GO:0015031	ESCRT I complex|late endosome membrane|nucleus|metal ion binding|mRNA binding|ubiquitin binding|intralumenal vesicle formation|iron ion homeostasis|multivesicular body assembly|protein transport	-	-
circRNA_0595|NW_021318708.1:152236_153246_+	NW_021318708.1	+	152236	153246	1011	578	sense-overlapping	XM_020831953.2	NW_021318708.1:149867_154691_+	1236	110103299	LOC110103299	cysteine synthase 2, transcript variant X3	GO:0005737,GO:0016021,GO:0005741,GO:0005739,GO:0004124,GO:0030170,GO:0006535	cytoplasm|integral component of membrane|mitochondrial outer membrane|mitochondrion|cysteine synthase activity|pyridoxal phosphate binding|cysteine biosynthetic process from serine	path:dct00270,path:dct00920,path:dct01100,path:dct01110,path:dct01200,path:dct01230	Cysteine and methionine metabolism|Sulfur metabolism|Metabolic pathways|Biosynthesis of secondary metabolites|Carbon metabolism|Biosynthesis of amino acids
circRNA_0596|NW_021318708.1:196074_196410_-	NW_021318708.1	-	196074	196410	337	337	exonic	XM_020831938.2	NW_021318708.1:168193_199555_-	1385	110103286	LOC110103286	uncharacterized LOC110103286	-	-	-	-
circRNA_0597|NW_021318709.1:11556_11925_-	NW_021318709.1	-	11556	11925	370	370	exonic	XM_020826820.2	NW_021318709.1:6432_17302_-	4493	110099621	LOC110099621	ABC transporter B family member 13-like	GO:0016021,GO:0005524,GO:0016887,GO:0042626	integral component of membrane|ATP binding|ATPase activity|ATPase-coupled transmembrane transporter activity	path:dct02010	ABC transporters
circRNA_0598|NW_021318709.1:11556_11929_-	NW_021318709.1	-	11556	11929	374	374	exonic	XM_020826820.2	NW_021318709.1:6432_17302_-	4493	110099621	LOC110099621	ABC transporter B family member 13-like	GO:0016021,GO:0005524,GO:0016887,GO:0042626	integral component of membrane|ATP binding|ATPase activity|ATPase-coupled transmembrane transporter activity	path:dct02010	ABC transporters
circRNA_0599|NW_021318709.1:159249_176866_+	NW_021318709.1	+	159249	176866	17618	840	sense-overlapping	XM_020826824.2	NW_021318709.1:136718_205248_+	2391	110099623	LOC110099623	uncharacterized LOC110099623	-	-	-	-
circRNA_0600|NW_021318709.1:176183_176866_+	NW_021318709.1	+	176183	176866	684	388	sense-overlapping	XM_020826824.2	NW_021318709.1:136718_205248_+	2391	110099623	LOC110099623	uncharacterized LOC110099623	-	-	-	-
circRNA_0601|NW_021318709.1:176183_187446_+	NW_021318709.1	+	176183	187446	11264	437	sense-overlapping	XM_020826824.2	NW_021318709.1:136718_205248_+	2391	110099623	LOC110099623	uncharacterized LOC110099623	-	-	-	-
circRNA_0602|NW_021318709.1:176183_191402_+	NW_021318709.1	+	176183	191402	15220	508	sense-overlapping	XM_020826824.2	NW_021318709.1:136718_205248_+	2391	110099623	LOC110099623	uncharacterized LOC110099623	-	-	-	-
circRNA_0603|NW_021318709.1:246867_250015_+	NW_021318709.1	+	246867	250015	3149	1029	sense-overlapping	XM_020826827.2	NW_021318709.1:240467_261795_+	2753	110099625	LOC110099625	uncharacterized LOC110099625	-	-	-	-
circRNA_0604|NW_021318709.1:370401_377450_-	NW_021318709.1	-	370401	377450	7050	453	sense-overlapping	XM_020826833.2	NW_021318709.1:340843_377504_-	1175	110099629	LOC110099629	diacylglycerol O-acyltransferase 1-2-like, transcript variant X2	GO:0009941,GO:0005789,GO:0016021,GO:0004144,GO:0006071,GO:0019432	chloroplast envelope|endoplasmic reticulum membrane|integral component of membrane|diacylglycerol O-acyltransferase activity|glycerol metabolic process|triglyceride biosynthetic process	-	-
circRNA_0605|NW_021318709.1:376689_377450_-	NW_021318709.1	-	376689	377450	762	342	sense-overlapping	XM_020826833.2	NW_021318709.1:340843_377504_-	1175	110099629	LOC110099629	diacylglycerol O-acyltransferase 1-2-like, transcript variant X2	GO:0009941,GO:0005789,GO:0016021,GO:0004144,GO:0006071,GO:0019432	chloroplast envelope|endoplasmic reticulum membrane|integral component of membrane|diacylglycerol O-acyltransferase activity|glycerol metabolic process|triglyceride biosynthetic process	-	-
circRNA_0606|NW_021318710.1:2166_3149_+	NW_021318710.1	+	2166	3149	984	320	sense-overlapping	XM_020816385.2	NW_021318710.1:2147_4074_+	763	110092038	LOC110092038	alcohol dehydrogenase class-3-like	GO:0005737,GO:0004022,GO:0051903,GO:0008270,GO:0006069	cytoplasm|alcohol dehydrogenase (NAD+) activity|S-(hydroxymethyl)glutathione dehydrogenase activity|zinc ion binding|ethanol oxidation	-	-
circRNA_0607|NW_021318710.1:50969_53253_+	NW_021318710.1	+	50969	53253	2285	509	sense-overlapping	XM_028693259.1	NW_021318710.1:48052_56718_+	2193	110092041	LOC110092041	calcium-dependent protein kinase 26	GO:0016020,GO:0005524,GO:0005509,GO:0004674	membrane|ATP binding|calcium ion binding|protein serine/threonine kinase activity	path:dct04626	Plant-pathogen interaction
circRNA_0608|NW_021318711.1:1055612_1055847_+	NW_021318711.1	+	1055612	1055847	236	158	sense-overlapping	XM_020831350.2	NW_021318711.1:1044144_1057693_+	2469	110102858	LOC110102858	uncharacterized LOC110102858, transcript variant X1	GO:0005737,GO:0005874	cytoplasm|microtubule	-	-
circRNA_0609|NW_021318711.1:1055612_1056150_+	NW_021318711.1	+	1055612	1056150	539	252	sense-overlapping	XM_020831350.2	NW_021318711.1:1044144_1057693_+	2469	110102858	LOC110102858	uncharacterized LOC110102858, transcript variant X1	GO:0005737,GO:0005874	cytoplasm|microtubule	-	-
circRNA_0610|NW_021318711.1:1255856_1257183_-	NW_021318711.1	-	1255856	1257183	1328	1044	sense-overlapping	XM_020831349.2	NW_021318711.1:1228021_1295123_-	6373	110102857	LOC110102857	uncharacterized LOC110102857, transcript variant X7	GO:0005634,GO:0051537,GO:0005524,GO:0004386,GO:0046872,GO:0042803,GO:0006342,GO:0042742,GO:0031047,GO:0006344,GO:0045814	nucleus|2 iron, 2 sulfur cluster binding|ATP binding|helicase activity|metal ion binding|protein homodimerization activity|chromatin silencing|defense response to bacterium|gene silencing by RNA|maintenance of chromatin silencing|negative regulation of gene expression, epigenetic	-	-
circRNA_0611|NW_021318711.1:1270538_1271408_-	NW_021318711.1	-	1270538	1271408	871	639	sense-overlapping	XM_020831349.2	NW_021318711.1:1228021_1295123_-	6373	110102857	LOC110102857	uncharacterized LOC110102857, transcript variant X7	GO:0005634,GO:0051537,GO:0005524,GO:0004386,GO:0046872,GO:0042803,GO:0006342,GO:0042742,GO:0031047,GO:0006344,GO:0045814	nucleus|2 iron, 2 sulfur cluster binding|ATP binding|helicase activity|metal ion binding|protein homodimerization activity|chromatin silencing|defense response to bacterium|gene silencing by RNA|maintenance of chromatin silencing|negative regulation of gene expression, epigenetic	-	-
circRNA_0612|NW_021318711.1:1423388_1423701_-	NW_021318711.1	-	1423388	1423701	314	228	sense-overlapping	XM_028693284.1	NW_021318711.1:1388353_1449254_-	1784	110098257	LOC110098257	DUF21 domain-containing protein At2g14520, transcript variant X2	GO:0005623,GO:0005737,GO:0016021,GO:0043231,GO:0005886,GO:0030026	cell|cytoplasm|integral component of membrane|intracellular membrane-bounded organelle|plasma membrane|cellular manganese ion homeostasis	-	-
circRNA_0613|NW_021318711.1:1423388_1439499_-	NW_021318711.1	-	1423388	1439499	16112	315	sense-overlapping	XM_028693284.1	NW_021318711.1:1388353_1449254_-	1784	110098257	LOC110098257	DUF21 domain-containing protein At2g14520, transcript variant X2	GO:0005623,GO:0005737,GO:0016021,GO:0043231,GO:0005886,GO:0030026	cell|cytoplasm|integral component of membrane|intracellular membrane-bounded organelle|plasma membrane|cellular manganese ion homeostasis	-	-
circRNA_0614|NW_021318711.1:1483835_1485426_+	NW_021318711.1	+	1483835	1485426	1592	187	sense-overlapping	XM_028693285.1	NW_021318711.1:1468478_1485692_+	676	110098249	LOC110098249	uncharacterized LOC110098249	GO:0080008,GO:0005654,GO:0005634,GO:0009788,GO:0032436	Cul4-RING E3 ubiquitin ligase complex|nucleoplasm|nucleus|negative regulation of abscisic acid-activated signaling pathway|positive regulation of proteasomal ubiquitin-dependent protein catabolic process	-	-
circRNA_0615|NW_021318711.1:1641664_1642401_+	NW_021318711.1	+	1641664	1642401	738	654	sense-overlapping	XM_020825019.2	NW_021318711.1:1640846_1642279_+	1350	110098260	LOC110098260	aminoacylase-1	-	-	-	-
circRNA_0616|NW_021318711.1:1828726_1847257_+	NW_021318711.1	+	1828726	1847257	18532	504	sense-overlapping	XM_020817109.2	NW_021318711.1:1808232_1854780_+	2326	110092524	LOC110092524	glycoprotein 3-alpha-L-fucosyltransferase A-like, transcript variant X4	GO:0005794,GO:0032580,GO:0016021,GO:0046920,GO:0008417,GO:0018392,GO:0046872,GO:0071555,GO:0036065,GO:0042355,GO:0006486,GO:0006487	Golgi apparatus|Golgi cisterna membrane|integral component of membrane|alpha-(1->3)-fucosyltransferase activity|fucosyltransferase activity|glycoprotein 3-alpha-L-fucosyltransferase activity|metal ion binding|cell wall organization|fucosylation|L-fucose catabolic process|protein glycosylation|protein N-linked glycosylation	path:dct00513,path:dct01100	Various types of N-glycan biosynthesis|Metabolic pathways
circRNA_0617|NW_021318711.1:2483680_2495954_+	NW_021318711.1	+	2483680	2495954	12275	12026	sense-overlapping	XM_028693294.1	NW_021318711.1:2482437_2484846_+	1346	110098835	LOC110098835	bidirectional sugar transporter SWEET14-like, transcript variant X2	GO:0005887,GO:0008515,GO:0051119	integral component of plasma membrane|sucrose transmembrane transporter activity|sugar transmembrane transporter activity	-	-
circRNA_0618|NW_021318711.1:2531891_2532546_-	NW_021318711.1	-	2531891	2532546	656	465	sense-overlapping	XM_020825753.2	NW_021318711.1:2509652_2533704_-	1864	110098817	LOC110098817	probable serine/threonine-protein kinase PBL7	-	-	path:dct04626	Plant-pathogen interaction
circRNA_0619|NW_021318711.1:2605266_2606743_-	NW_021318711.1	-	2605266	2606743	1478	383	sense-overlapping	XM_028693268.1	NW_021318711.1:2578700_2611125_-	2191	110098890	LOC110098890	protein MICRORCHIDIA 4-like	GO:0016604,GO:0005654,GO:0005634,GO:0005524,GO:0016887,GO:0003677,GO:0004519,GO:0016301,GO:0043621,GO:0003723,GO:0006325,GO:0006952,GO:0006281,GO:0031047,GO:1902290,GO:0031935,GO:0044030,GO:0006282	nuclear body|nucleoplasm|nucleus|ATP binding|ATPase activity|DNA binding|endonuclease activity|kinase activity|protein self-association|RNA binding|chromatin organization|defense response|DNA repair|gene silencing by RNA|positive regulation of defense response to oomycetes|regulation of chromatin silencing|regulation of DNA methylation|regulation of DNA repair	-	-
circRNA_0620|NW_021318711.1:2695886_2696123_+	NW_021318711.1	+	2695886	2696123	238	167	sense-overlapping	XM_028693295.1	NW_021318711.1:2621844_2736130_+	2256	110098771	LOC110098771	uridine kinase-like protein 4, transcript variant X2	GO:0005524,GO:0005525,GO:0016301,GO:0004845,GO:0004849,GO:0044211,GO:0009116,GO:0044206	ATP binding|GTP binding|kinase activity|uracil phosphoribosyltransferase activity|uridine kinase activity|CTP salvage|nucleoside metabolic process|UMP salvage	path:dct00240,path:dct01100	Pyrimidine metabolism|Metabolic pathways
circRNA_0621|NW_021318711.1:3489613_3497781_+	NW_021318711.1	+	3489613	3497781	8169	421	sense-overlapping	XM_028693297.1	NW_021318711.1:3464818_3623147_+	4278	110098356	LOC110098356	DENN domain and WD repeat-containing protein SCD1, transcript variant X3	GO:0030136,GO:0080008,GO:0005886,GO:0000911,GO:0010235,GO:0009825,GO:0045824,GO:0040008	clathrin-coated vesicle|Cul4-RING E3 ubiquitin ligase complex|plasma membrane|cytokinesis by cell plate formation|guard mother cell cytokinesis|multidimensional cell growth|negative regulation of innate immune response|regulation of growth	-	-
circRNA_0622|NW_021318711.1:3501406_3525598_+	NW_021318711.1	+	3501406	3525598	24193	792	sense-overlapping	XM_028693297.1	NW_021318711.1:3464818_3623147_+	4278	110098356	LOC110098356	DENN domain and WD repeat-containing protein SCD1, transcript variant X3	GO:0030136,GO:0080008,GO:0005886,GO:0000911,GO:0010235,GO:0009825,GO:0045824,GO:0040008	clathrin-coated vesicle|Cul4-RING E3 ubiquitin ligase complex|plasma membrane|cytokinesis by cell plate formation|guard mother cell cytokinesis|multidimensional cell growth|negative regulation of innate immune response|regulation of growth	-	-
circRNA_0623|NW_021318711.1:3546594_3546993_+	NW_021318711.1	+	3546594	3546993	400	201	sense-overlapping	XM_028693297.1	NW_021318711.1:3464818_3623147_+	4278	110098356	LOC110098356	DENN domain and WD repeat-containing protein SCD1, transcript variant X3	GO:0030136,GO:0080008,GO:0005886,GO:0000911,GO:0010235,GO:0009825,GO:0045824,GO:0040008	clathrin-coated vesicle|Cul4-RING E3 ubiquitin ligase complex|plasma membrane|cytokinesis by cell plate formation|guard mother cell cytokinesis|multidimensional cell growth|negative regulation of innate immune response|regulation of growth	-	-
circRNA_0624|NW_021318711.1:3595910_3596698_+	NW_021318711.1	+	3595910	3596698	789	457	sense-overlapping	XM_028693297.1	NW_021318711.1:3464818_3623147_+	4278	110098356	LOC110098356	DENN domain and WD repeat-containing protein SCD1, transcript variant X3	GO:0030136,GO:0080008,GO:0005886,GO:0000911,GO:0010235,GO:0009825,GO:0045824,GO:0040008	clathrin-coated vesicle|Cul4-RING E3 ubiquitin ligase complex|plasma membrane|cytokinesis by cell plate formation|guard mother cell cytokinesis|multidimensional cell growth|negative regulation of innate immune response|regulation of growth	-	-
circRNA_0625|NW_021318711.1:4083924_4084584_+	NW_021318711.1	+	4083924	4084584	661	512	sense-overlapping	XM_020824141.2	NW_021318711.1:4061347_4142222_+	1416	110097637	LOC110097637	probable splicing factor, arginine/serine-rich 6	GO:0003723	RNA binding	-	-
circRNA_0626|NW_021318711.1:4126121_4136165_+	NW_021318711.1	+	4126121	4136165	10045	325	sense-overlapping	XM_020824141.2	NW_021318711.1:4061347_4142222_+	1416	110097637	LOC110097637	probable splicing factor, arginine/serine-rich 6	GO:0003723	RNA binding	-	-
circRNA_0627|NW_021318715.1:66152_67978_+	NW_021318715.1	+	66152	67978	1827	530	sense-overlapping	XM_020827001.2	NW_021318715.1:61453_79275_+	1827	110099747	LOC110099747	actin-related protein 2/3 complex subunit 2A, transcript variant X1	GO:0005885,GO:0042995,GO:0005737,GO:0051015,GO:0005200,GO:0007015,GO:0030041,GO:0034314,GO:0010090	Arp2/3 protein complex|cell projection|cytoplasm|actin filament binding|structural constituent of cytoskeleton|actin filament organization|actin filament polymerization|Arp2/3 complex-mediated actin nucleation|trichome morphogenesis	path:dct04144	Endocytosis
circRNA_0628|NW_021318715.1:107011_111022_-	NW_021318715.1	-	107011	111022	4012	523	sense-overlapping	XM_020826962.2	NW_021318715.1:89960_123763_-	2003	110099718	LOC110099718	dihydrolipoyllysine-residue acetyltransferase component 2 of pyruvate dehydrogenase complex, mitochondrial, transcript variant X3	GO:0009941,GO:0005737,GO:0005829,GO:0005759,GO:0005739,GO:0045254,GO:0016407,GO:0005507,GO:0004742,GO:0031405,GO:0006096	chloroplast envelope|cytoplasm|cytosol|mitochondrial matrix|mitochondrion|pyruvate dehydrogenase complex|acetyltransferase activity|copper ion binding|dihydrolipoyllysine-residue acetyltransferase activity|lipoic acid binding|glycolytic process	path:dct00010,path:dct00020,path:dct00620,path:dct01100,path:dct01110,path:dct01200	Glycolysis / Gluconeogenesis|Citrate cycle (TCA cycle)|Pyruvate metabolism|Metabolic pathways|Biosynthesis of secondary metabolites|Carbon metabolism
circRNA_0629|NW_021318715.1:107011_111039_-	NW_021318715.1	-	107011	111039	4029	540	sense-overlapping	XM_020826962.2	NW_021318715.1:89960_123763_-	2003	110099718	LOC110099718	dihydrolipoyllysine-residue acetyltransferase component 2 of pyruvate dehydrogenase complex, mitochondrial, transcript variant X3	GO:0009941,GO:0005737,GO:0005829,GO:0005759,GO:0005739,GO:0045254,GO:0016407,GO:0005507,GO:0004742,GO:0031405,GO:0006096	chloroplast envelope|cytoplasm|cytosol|mitochondrial matrix|mitochondrion|pyruvate dehydrogenase complex|acetyltransferase activity|copper ion binding|dihydrolipoyllysine-residue acetyltransferase activity|lipoic acid binding|glycolytic process	path:dct00010,path:dct00020,path:dct00620,path:dct01100,path:dct01110,path:dct01200	Glycolysis / Gluconeogenesis|Citrate cycle (TCA cycle)|Pyruvate metabolism|Metabolic pathways|Biosynthesis of secondary metabolites|Carbon metabolism
circRNA_0630|NW_021318715.1:650320_651477_+	NW_021318715.1	+	650320	651477	1158	372	sense-overlapping	XM_020834748.2	NW_021318715.1:648084_684682_+	1822	110105307	LOC110105307	intermediate cleaving peptidase 55, mitochondrial, transcript variant X1	GO:0005739,GO:0005634,GO:0004177,GO:0030145,GO:0008237,GO:0008233,GO:0050821,GO:0006508	mitochondrion|nucleus|aminopeptidase activity|manganese ion binding|metallopeptidase activity|peptidase activity|protein stabilization|proteolysis	-	-
circRNA_0631|NW_021318718.1:121598_190987_-	NW_021318718.1	-	121598	190987	69390	69390	sense-overlapping	XM_028693314.1	NW_021318718.1:116474_121738_-	717	110114683	LOC110114683	probable homogentisate phytyltransferase 1, chloroplastic	GO:0009535,GO:0016021,GO:0016765,GO:0010189	chloroplast thylakoid membrane|integral component of membrane|transferase activity, transferring alkyl or aryl (other than methyl) groups|vitamin E biosynthetic process	path:dct00130,path:dct01100,path:dct01110	Ubiquinone and other terpenoid-quinone biosynthesis|Metabolic pathways|Biosynthesis of secondary metabolites
circRNA_0632|NW_021318724.1:471283_471670_+	NW_021318724.1	+	471283	471670	388	321	sense-overlapping	XM_020849118.2	NW_021318724.1:455679_471670_+	1736	110115758	LOC110115758	protein SCAI homolog, transcript variant X2	-	-	-	-
circRNA_0633|NW_021318726.1:105230_106264_+	NW_021318726.1	+	105230	106264	1035	387	sense-overlapping	XM_028693346.1	NW_021318726.1:86154_202084_+	3904	110101389	LOC110101389	beta-galactosidase, transcript variant X2	GO:0009341,GO:0004565,GO:0030246,GO:0005975	beta-galactosidase complex|beta-galactosidase activity|carbohydrate binding|carbohydrate metabolic process	path:dct00052,path:dct00511,path:dct00600,path:dct01100	Galactose metabolism|Other glycan degradation|Sphingolipid metabolism|Metabolic pathways
circRNA_0634|NW_021318726.1:116046_125326_+	NW_021318726.1	+	116046	125326	9281	329	sense-overlapping	XM_028693350.1	NW_021318726.1:105336_202084_+	3345	110101389	LOC110101389	beta-galactosidase, transcript variant X6	GO:0009341,GO:0004565,GO:0030246,GO:0005975	beta-galactosidase complex|beta-galactosidase activity|carbohydrate binding|carbohydrate metabolic process	path:dct00052,path:dct00511,path:dct00600,path:dct01100	Galactose metabolism|Other glycan degradation|Sphingolipid metabolism|Metabolic pathways
circRNA_0635|NW_021318726.1:124896_125326_+	NW_021318726.1	+	124896	125326	431	250	sense-overlapping	XM_028693350.1	NW_021318726.1:105336_202084_+	3345	110101389	LOC110101389	beta-galactosidase, transcript variant X6	GO:0009341,GO:0004565,GO:0030246,GO:0005975	beta-galactosidase complex|beta-galactosidase activity|carbohydrate binding|carbohydrate metabolic process	path:dct00052,path:dct00511,path:dct00600,path:dct01100	Galactose metabolism|Other glycan degradation|Sphingolipid metabolism|Metabolic pathways
circRNA_0636|NW_021318726.1:200874_201782_+	NW_021318726.1	+	200874	201782	909	806	sense-overlapping	XM_028693350.1	NW_021318726.1:105336_202084_+	3345	110101389	LOC110101389	beta-galactosidase, transcript variant X6	GO:0009341,GO:0004565,GO:0030246,GO:0005975	beta-galactosidase complex|beta-galactosidase activity|carbohydrate binding|carbohydrate metabolic process	path:dct00052,path:dct00511,path:dct00600,path:dct01100	Galactose metabolism|Other glycan degradation|Sphingolipid metabolism|Metabolic pathways
circRNA_0637|NW_021318726.1:324828_325580_+	NW_021318726.1	+	324828	325580	753	547	sense-overlapping	XM_020830065.2	NW_021318726.1:318599_330263_+	2677	110101954	LOC110101954	crooked neck-like protein 1, transcript variant X1	GO:0071013,GO:0000785,GO:0071014,GO:0000974,GO:0071006,GO:0071007,GO:0071008,GO:0071004,GO:0003682,GO:0003688,GO:0000354,GO:0006270,GO:0000398,GO:0000245	catalytic step 2 spliceosome|chromatin|post-mRNA release spliceosomal complex|Prp19 complex|U2-type catalytic step 1 spliceosome|U2-type catalytic step 2 spliceosome|U2-type post-mRNA release spliceosomal complex|U2-type prespliceosome|chromatin binding|DNA replication origin binding|cis assembly of pre-catalytic spliceosome|DNA replication initiation|mRNA splicing, via spliceosome|spliceosomal c…	path:dct03040	Spliceosome
circRNA_0638|NW_021318726.1:371640_373562_-	NW_021318726.1	-	371640	373562	1923	176	sense-overlapping	XM_020830071.2	NW_021318726.1:370943_374033_-	876	110101958	LOC110101958	H/ACA ribonucleoprotein complex subunit 2-like protein	GO:0031429,GO:0005730,GO:0005732,GO:0034513,GO:0003723,GO:0000469,GO:0000470,GO:0031118,GO:0031120	box H/ACA snoRNP complex|nucleolus|small nucleolar ribonucleoprotein complex|box H/ACA snoRNA binding|RNA binding|cleavage involved in rRNA processing|maturation of LSU-rRNA|rRNA pseudouridine synthesis|snRNA pseudouridine synthesis	path:dct03008	Ribosome biogenesis in eukaryotes
circRNA_0639|NW_021318726.1:1323881_1330402_+	NW_021318726.1	+	1323881	1330402	6522	581	sense-overlapping	XM_020826244.2	NW_021318726.1:1310225_1350789_+	1234	110099159	LOC110099159	protein TIC 40, chloroplastic, transcript variant X1	GO:0009706,GO:0016021,GO:0015031	chloroplast inner membrane|integral component of membrane|protein transport	-	-
circRNA_0640|NW_021318726.1:1323881_1350739_+	NW_021318726.1	+	1323881	1350739	26859	676	sense-overlapping	XM_020826244.2	NW_021318726.1:1310225_1350789_+	1234	110099159	LOC110099159	protein TIC 40, chloroplastic, transcript variant X1	GO:0009706,GO:0016021,GO:0015031	chloroplast inner membrane|integral component of membrane|protein transport	-	-
circRNA_0641|NW_021318726.1:1385536_1385796_+	NW_021318726.1	+	1385536	1385796	261	179	sense-overlapping	XM_028693377.1	NW_021318726.1:1377401_1388109_+	2336	110099112	LOC110099112	nucleolar complex protein 2 homolog, transcript variant X7	GO:0005829,GO:0030690,GO:0030691,GO:0005730,GO:0005654,GO:0042273	cytosol|Noc1p-Noc2p complex|Noc2p-Noc3p complex|nucleolus|nucleoplasm|ribosomal large subunit biogenesis	-	-
circRNA_0642|NW_021318726.1:1649626_1650195_+	NW_021318726.1	+	1649626	1650195	570	307	sense-overlapping	XM_020826186.2	NW_021318726.1:1649579_1695773_+	1482	110099125	LOC110099125	protein DECREASED SIZE EXCLUSION LIMIT 1, transcript variant X1	GO:0005737,GO:0005634,GO:0007049,GO:0006974,GO:0048481,GO:0009663,GO:0010497,GO:0009555,GO:0071158,GO:0006282,GO:0010044	cytoplasm|nucleus|cell cycle|cellular response to DNA damage stimulus|plant ovule development|plasmodesma organization|plasmodesmata-mediated intercellular transport|pollen development|positive regulation of cell cycle arrest|regulation of DNA repair|response to aluminum ion	-	-
circRNA_0643|NW_021318727.1:219702_220002_-	NW_021318727.1	-	219702	220002	301	224	sense-overlapping	XM_020821826.2	NW_021318727.1:217943_256318_-	1966	110096035	LOC110096035	BRCA1-associated protein, transcript variant X1	GO:0000151,GO:0016787,GO:0046982,GO:0004842,GO:0008270,GO:0010029	ubiquitin ligase complex|hydrolase activity|protein heterodimerization activity|ubiquitin-protein transferase activity|zinc ion binding|regulation of seed germination	-	-
circRNA_0644|NW_021318727.1:657970_658351_+	NW_021318727.1	+	657970	658351	382	291	sense-overlapping	XM_020821374.2	NW_021318727.1:641931_670111_+	2490	110095700	LOC110095700	uncharacterized LOC110095700, transcript variant X1	-	-	-	-
circRNA_0645|NW_021318728.1:458173_464056_+	NW_021318728.1	+	458173	464056	5884	321	sense-overlapping	XM_028693398.1	NW_021318728.1:446424_464776_+	1195	110103337	LOC110103337	uncharacterized LOC110103337	GO:0005730,GO:0005634,GO:0003723,GO:0009383,GO:0016428,GO:0070475,GO:0030488	nucleolus|nucleus|RNA binding|rRNA (cytosine-C5-)-methyltransferase activity|tRNA (cytosine-5-)-methyltransferase activity|rRNA base methylation|tRNA methylation	-	-
circRNA_0646|NW_021318728.1:538119_538283_+	NW_021318728.1	+	538119	538283	165	165	exonic	XM_020832002.2	NW_021318728.1:533470_548024_+	1928	110103332	LOC110103332	beta-amylase 2, chloroplastic	GO:0009507,GO:0009570,GO:0102229,GO:0016161,GO:0000272	chloroplast|chloroplast stroma|amylopectin maltohydrolase activity|beta-amylase activity|polysaccharide catabolic process	path:dct00500,path:dct01100,path:dct01110	Starch and sucrose metabolism|Metabolic pathways|Biosynthesis of secondary metabolites
circRNA_0647|NW_021318728.1:588875_594978_+	NW_021318728.1	+	588875	594978	6104	437	sense-overlapping	XM_020831975.2	NW_021318728.1:586017_601611_+	2752	110103317	LOC110103317	UDP-N-acetylmuramoyl-L-alanyl-D-glutamate--2,6-diaminopimelate ligase MurE homolog, chloroplastic, transcript variant X1	GO:0009507,GO:0042644,GO:0016881,GO:0005524,GO:0009058,GO:0051301,GO:0010020,GO:0009658,GO:0008360	chloroplast|chloroplast nucleoid|acid-amino acid ligase activity|ATP binding|biosynthetic process|cell division|chloroplast fission|chloroplast organization|regulation of cell shape	-	-
circRNA_0648|NW_021318728.1:621791_622154_-	NW_021318728.1	-	621791	622154	364	277	sense-overlapping	XM_020831990.2	NW_021318728.1:610027_636934_-	2105	110103325	LOC110103325	SKP1-like protein 21, transcript variant X1	GO:0005737,GO:0005634,GO:0019005,GO:0097602,GO:0016567,GO:0031146	cytoplasm|nucleus|SCF ubiquitin ligase complex|cullin family protein binding|protein ubiquitination|SCF-dependent proteasomal ubiquitin-dependent protein catabolic process	-	-
circRNA_0649|NW_021318735.1:793239_793733_-	NW_021318735.1	-	793239	793733	495	306	sense-overlapping	XM_020848922.2	NW_021318735.1:753085_796929_-	2140	110115637	LOC110115637	sodium/proton antiporter 1	GO:0009941,GO:0031969,GO:0016021,GO:0015297,GO:0050833,GO:0006848,GO:0009651,GO:0006814	chloroplast envelope|chloroplast membrane|integral component of membrane|antiporter activity|pyruvate transmembrane transporter activity|pyruvate transport|response to salt stress|sodium ion transport	-	-
circRNA_0650|NW_021318735.1:1058906_1059076_-	NW_021318735.1	-	1058906	1059076	171	171	exonic	XM_020846110.2	NW_021318735.1:1049440_1066134_-	1933	110113493	LOC110113493	U11/U12 small nuclear ribonucleoprotein 65 kDa protein, transcript variant X4	GO:0005634,GO:0005689,GO:0097157,GO:0030626,GO:0010229,GO:0000398	nucleus|U12-type spliceosomal complex|pre-mRNA intronic binding|U12 snRNA binding|inflorescence development|mRNA splicing, via spliceosome	-	-
circRNA_0651|NW_021318735.1:1747641_1750134_-	NW_021318735.1	-	1747641	1750134	2494	681	sense-overlapping	XM_020836769.2	NW_021318735.1:1742423_1754878_-	4465	110106764	LOC110106764	nuclear pore complex protein NUP1, transcript variant X1	GO:0005829,GO:0005635,GO:0034399,GO:0005643,GO:0071763,GO:0006997,GO:0016973	cytosol|nuclear envelope|nuclear periphery|nuclear pore|nuclear membrane organization|nucleus organization|poly(A)+ mRNA export from nucleus	-	-
circRNA_0652|NW_021318735.1:1749443_1750134_-	NW_021318735.1	-	1749443	1750134	692	282	sense-overlapping	XM_020836769.2	NW_021318735.1:1742423_1754878_-	4465	110106764	LOC110106764	nuclear pore complex protein NUP1, transcript variant X1	GO:0005829,GO:0005635,GO:0034399,GO:0005643,GO:0071763,GO:0006997,GO:0016973	cytosol|nuclear envelope|nuclear periphery|nuclear pore|nuclear membrane organization|nucleus organization|poly(A)+ mRNA export from nucleus	-	-
circRNA_0653|NW_021318735.1:1852308_1852707_+	NW_021318735.1	+	1852308	1852707	400	297	sense-overlapping	XM_020836744.2	NW_021318735.1:1847760_1858475_+	2177	110106754	LOC110106754	calcium-dependent protein kinase 10	GO:0005737,GO:0016020,GO:0005634,GO:0005524,GO:0005509,GO:0009931,GO:0005516,GO:0004683,GO:0035556,GO:0018105,GO:0046777	cytoplasm|membrane|nucleus|ATP binding|calcium ion binding|calcium-dependent protein serine/threonine kinase activity|calmodulin binding|calmodulin-dependent protein kinase activity|intracellular signal transduction|peptidyl-serine phosphorylation|protein autophosphorylation	path:dct04626	Plant-pathogen interaction
circRNA_0654|NW_021318741.1:310088_310700_+	NW_021318741.1	+	310088	310700	613	435	sense-overlapping	XM_020847931.2	NW_021318741.1:298205_381616_+	1106	110114895	LOC110114895	B-box zinc finger protein 18-like, transcript variant X2	GO:0005634,GO:0008270,GO:0010100,GO:0009640,GO:0006355	nucleus|zinc ion binding|negative regulation of photomorphogenesis|photomorphogenesis|regulation of transcription, DNA-templated	-	-
circRNA_0655|NW_021318744.1:157798_161629_+	NW_021318744.1	+	157798	161629	3832	572	sense-overlapping	XM_028693436.1	NW_021318744.1:155442_162043_+	1403	110104778	LOC110104778	cryptochrome DASH, chloroplastic/mitochondrial, transcript variant X1	GO:0009507,GO:0005739,GO:0003677,GO:0003913,GO:0006281,GO:0018298	chloroplast|mitochondrion|DNA binding|DNA photolyase activity|DNA repair|protein-chromophore linkage	-	-
circRNA_0656|NW_021318744.1:161162_161629_+	NW_021318744.1	+	161162	161629	468	216	sense-overlapping	XM_028693436.1	NW_021318744.1:155442_162043_+	1403	110104778	LOC110104778	cryptochrome DASH, chloroplastic/mitochondrial, transcript variant X1	GO:0009507,GO:0005739,GO:0003677,GO:0003913,GO:0006281,GO:0018298	chloroplast|mitochondrion|DNA binding|DNA photolyase activity|DNA repair|protein-chromophore linkage	-	-
circRNA_0657|NW_021318751.1:427720_428007_-	NW_021318751.1	-	427720	428007	288	209	sense-overlapping	XM_020846678.2	NW_021318751.1:405406_428289_-	2260	110113951	LOC110113951	kinesin-like protein KIN-7L	GO:0005871,GO:0005874,GO:0005524,GO:0016887,GO:0008017,GO:0003777,GO:0007018	kinesin complex|microtubule|ATP binding|ATPase activity|microtubule binding|microtubule motor activity|microtubule-based movement	-	-
circRNA_0658|NW_021318751.1:458017_468944_-	NW_021318751.1	-	458017	468944	10928	178	sense-overlapping	XM_020846665.2	NW_021318751.1:452117_499987_-	1758	110113939	LOC110113939	uncharacterized protein KIAA0930 homolog, transcript variant X2	-	-	-	-
circRNA_0659|NW_021318751.1:592465_593131_+	NW_021318751.1	+	592465	593131	667	344	sense-overlapping	XM_028693456.1	NW_021318751.1:582747_599162_+	1666	110113940	LOC110113940	serine carboxypeptidase-like 18	GO:0005576,GO:0004185,GO:0019748	extracellular region|serine-type carboxypeptidase activity|secondary metabolic process	-	-
circRNA_0660|NW_021318752.1:80482_90956_+	NW_021318752.1	+	80482	90956	10475	277	sense-overlapping	XM_020819507.2	NW_021318752.1:54487_109303_+	2606	110094305	LOC110094305	flowering time control protein FY, transcript variant X1	GO:0005847,GO:0030154,GO:0009908,GO:0006378	mRNA cleavage and polyadenylation specificity factor complex|cell differentiation|flower development|mRNA polyadenylation	path:dct03015	mRNA surveillance pathway
circRNA_0661|NW_021318752.1:327038_327331_-	NW_021318752.1	-	327038	327331	294	294	exonic	XM_020819513.2	NW_021318752.1:275262_344204_-	2464	110094310	LOC110094310	probable receptor-like protein kinase At1g49730, transcript variant X1	-	-	-	-
circRNA_0662|NW_021318753.1:9269_9430_+	NW_021318753.1	+	9269	9430	162	162	exonic	XM_028693459.1	NW_021318753.1:7518_9722_+	553	114579312	LOC114579312	THO complex subunit 1	GO:0005634,GO:0000347,GO:0000445,GO:0003723,GO:0050832,GO:0009873,GO:0031047,GO:0006406,GO:0006397,GO:0010267,GO:0032784,GO:0008380	nucleus|THO complex|THO complex part of transcription export complex|RNA binding|defense response to fungus|ethylene-activated signaling pathway|gene silencing by RNA|mRNA export from nucleus|mRNA processing|production of ta-siRNAs involved in RNA interference|regulation of DNA-templated transcription, elongation|RNA splicing	-	-
circRNA_0663|NW_021318754.1:610054_613068_-	NW_021318754.1	-	610054	613068	3015	257	sense-overlapping	XM_020834509.2	NW_021318754.1:607003_615340_-	1258	110105133	LOC110105133	ras-related protein RABC2a	GO:0005794,GO:0005777,GO:0005886,GO:0005525,GO:0030742,GO:0003924,GO:0080115,GO:0006886,GO:0032482	Golgi apparatus|peroxisome|plasma membrane|GTP binding|GTP-dependent protein binding|GTPase activity|myosin XI tail binding|intracellular protein transport|Rab protein signal transduction	-	-
circRNA_0664|NW_021318754.1:646020_646816_-	NW_021318754.1	-	646020	646816	797	452	sense-overlapping	XM_020834511.2	NW_021318754.1:635279_647419_-	2013	110105135	LOC110105135	increased DNA methylation 1	GO:0005634,GO:0009506,GO:0010385,GO:0004402,GO:0042393,GO:0046872,GO:0044154,GO:0043971,GO:0043972,GO:0044030,GO:0080188	nucleus|plasmodesma|double-stranded methylated DNA binding|histone acetyltransferase activity|histone binding|metal ion binding|histone H3-K14 acetylation|histone H3-K18 acetylation|histone H3-K23 acetylation|regulation of DNA methylation|RNA-directed DNA methylation	-	-
circRNA_0665|NW_021318754.1:1020089_1020741_+	NW_021318754.1	+	1020089	1020741	653	206	sense-overlapping	XM_020834160.2	NW_021318754.1:1001095_1048108_+	2024	110104878	LOC110104878	actin-related protein 9, transcript variant X1	GO:0031011,GO:0006338	Ino80 complex|chromatin remodeling	-	-
circRNA_0666|NW_021318754.1:1029956_1031713_+	NW_021318754.1	+	1029956	1031713	1758	222	sense-overlapping	XM_020834160.2	NW_021318754.1:1001095_1048108_+	2024	110104878	LOC110104878	actin-related protein 9, transcript variant X1	GO:0031011,GO:0006338	Ino80 complex|chromatin remodeling	-	-
circRNA_0667|NW_021318755.1:58383_65483_+	NW_021318755.1	+	58383	65483	7101	364	sense-overlapping	XM_028693477.1	NW_021318755.1:43405_128000_+	3257	110099163	LOC110099163	probable inactive ATP-dependent zinc metalloprotease FTSHI 1, chloroplastic	GO:0009507,GO:0009941,GO:0009706,GO:0005829,GO:0016021,GO:0005739,GO:0009536,GO:0062091,GO:0005524,GO:0004176,GO:0016464,GO:0004222,GO:0010020,GO:0009658,GO:0009793,GO:0043572,GO:0045037,GO:0006508	chloroplast|chloroplast envelope|chloroplast inner membrane|cytosol|integral component of membrane|mitochondrion|plastid|Ycf2/FtsHi complex|ATP binding|ATP-dependent peptidase activity|chloroplast protein-transporting ATPase activity|metalloendopeptidase activity|chloroplast fission|chloroplast organization|embryo development ending in seed dormancy|plastid fission|protein import into chloroplast…	-	-
circRNA_0668|NW_021318755.1:64596_65483_+	NW_021318755.1	+	64596	65483	888	311	sense-overlapping	XM_028693477.1	NW_021318755.1:43405_128000_+	3257	110099163	LOC110099163	probable inactive ATP-dependent zinc metalloprotease FTSHI 1, chloroplastic	GO:0009507,GO:0009941,GO:0009706,GO:0005829,GO:0016021,GO:0005739,GO:0009536,GO:0062091,GO:0005524,GO:0004176,GO:0016464,GO:0004222,GO:0010020,GO:0009658,GO:0009793,GO:0043572,GO:0045037,GO:0006508	chloroplast|chloroplast envelope|chloroplast inner membrane|cytosol|integral component of membrane|mitochondrion|plastid|Ycf2/FtsHi complex|ATP binding|ATP-dependent peptidase activity|chloroplast protein-transporting ATPase activity|metalloendopeptidase activity|chloroplast fission|chloroplast organization|embryo development ending in seed dormancy|plastid fission|protein import into chloroplast…	-	-
circRNA_0669|NW_021318756.1:116539_117756_-	NW_021318756.1	-	116539	117756	1218	566	sense-overlapping	XM_028693478.1	NW_021318756.1:116537_125759_-	1014	110091978	LOC110091978	protein translocase subunit SECA2, chloroplastic-like	GO:0009941,GO:0031969,GO:0005524,GO:0015462,GO:0015450,GO:0017038,GO:0006605	chloroplast envelope|chloroplast membrane|ATP binding|ATPase-coupled protein transmembrane transporter activity|P-P-bond-hydrolysis-driven protein transmembrane transporter activity|protein import|protein targeting	-	-
circRNA_0670|NW_021318756.1:391693_391986_+	NW_021318756.1	+	391693	391986	294	223	sense-overlapping	XM_020816303.2	NW_021318756.1:368042_392337_+	1008	110091976	LOC110091976	ubiquitin domain-containing protein 2	-	-	-	-
circRNA_0671|NW_021318768.1:88575_88841_-	NW_021318768.1	-	88575	88841	267	186	sense-overlapping	XM_020849050.2	NW_021318768.1:81284_127599_-	2300	110115723	LOC110115723	CLP protease regulatory subunit CLPX1, mitochondrial, transcript variant X1	GO:0005759,GO:0005524,GO:0004176,GO:0051082,GO:0030163,GO:0006457	mitochondrial matrix|ATP binding|ATP-dependent peptidase activity|unfolded protein binding|protein catabolic process|protein folding	-	-
circRNA_0672|NW_021318768.1:88575_89771_-	NW_021318768.1	-	88575	89771	1197	456	sense-overlapping	XM_020849050.2	NW_021318768.1:81284_127599_-	2300	110115723	LOC110115723	CLP protease regulatory subunit CLPX1, mitochondrial, transcript variant X1	GO:0005759,GO:0005524,GO:0004176,GO:0051082,GO:0030163,GO:0006457	mitochondrial matrix|ATP binding|ATP-dependent peptidase activity|unfolded protein binding|protein catabolic process|protein folding	-	-
circRNA_0673|NW_021318768.1:88575_89877_-	NW_021318768.1	-	88575	89877	1303	462	sense-overlapping	XM_020849050.2	NW_021318768.1:81284_127599_-	2300	110115723	LOC110115723	CLP protease regulatory subunit CLPX1, mitochondrial, transcript variant X1	GO:0005759,GO:0005524,GO:0004176,GO:0051082,GO:0030163,GO:0006457	mitochondrial matrix|ATP binding|ATP-dependent peptidase activity|unfolded protein binding|protein catabolic process|protein folding	-	-
circRNA_0674|NW_021318768.1:88631_89877_-	NW_021318768.1	-	88631	89877	1247	406	sense-overlapping	XM_020849050.2	NW_021318768.1:81284_127599_-	2300	110115723	LOC110115723	CLP protease regulatory subunit CLPX1, mitochondrial, transcript variant X1	GO:0005759,GO:0005524,GO:0004176,GO:0051082,GO:0030163,GO:0006457	mitochondrial matrix|ATP binding|ATP-dependent peptidase activity|unfolded protein binding|protein catabolic process|protein folding	-	-
circRNA_0675|NW_021318768.1:88779_89877_-	NW_021318768.1	-	88779	89877	1099	339	sense-overlapping	XM_020849050.2	NW_021318768.1:81284_127599_-	2300	110115723	LOC110115723	CLP protease regulatory subunit CLPX1, mitochondrial, transcript variant X1	GO:0005759,GO:0005524,GO:0004176,GO:0051082,GO:0030163,GO:0006457	mitochondrial matrix|ATP binding|ATP-dependent peptidase activity|unfolded protein binding|protein catabolic process|protein folding	-	-
circRNA_0676|NW_021318770.1:163551_164224_-	NW_021318770.1	-	163551	164224	674	569	sense-overlapping	XM_020846174.2	NW_021318770.1:149236_205368_-	2929	110113541	LOC110113541	tricalbin-3, transcript variant X3	GO:0005783,GO:0016021,GO:0008289,GO:0046872,GO:0006869	endoplasmic reticulum|integral component of membrane|lipid binding|metal ion binding|lipid transport	-	-
circRNA_0677|NW_021318775.1:838450_838671_-	NW_021318775.1	-	838450	838671	222	222	exonic	XM_028693516.1	NW_021318775.1:837471_1011355_-	4167	110092698	LOC110092698	protein PIR	GO:0031209,GO:0000340,GO:0030036,GO:0045010,GO:0000902,GO:0006417,GO:0010090	SCAR complex|RNA 7-methylguanosine cap binding|actin cytoskeleton organization|actin nucleation|cell morphogenesis|regulation of translation|trichome morphogenesis	path:dct03013	RNA transport
circRNA_0678|NW_021318775.1:873177_876151_-	NW_021318775.1	-	873177	876151	2975	216	sense-overlapping	XM_028693516.1	NW_021318775.1:837471_1011355_-	4167	110092698	LOC110092698	protein PIR	GO:0031209,GO:0000340,GO:0030036,GO:0045010,GO:0000902,GO:0006417,GO:0010090	SCAR complex|RNA 7-methylguanosine cap binding|actin cytoskeleton organization|actin nucleation|cell morphogenesis|regulation of translation|trichome morphogenesis	path:dct03013	RNA transport
circRNA_0679|NW_021318775.1:873177_910152_-	NW_021318775.1	-	873177	910152	36976	510	sense-overlapping	XM_028693516.1	NW_021318775.1:837471_1011355_-	4167	110092698	LOC110092698	protein PIR	GO:0031209,GO:0000340,GO:0030036,GO:0045010,GO:0000902,GO:0006417,GO:0010090	SCAR complex|RNA 7-methylguanosine cap binding|actin cytoskeleton organization|actin nucleation|cell morphogenesis|regulation of translation|trichome morphogenesis	path:dct03013	RNA transport
circRNA_0680|NW_021318775.1:895106_910152_-	NW_021318775.1	-	895106	910152	15047	294	sense-overlapping	XM_028693516.1	NW_021318775.1:837471_1011355_-	4167	110092698	LOC110092698	protein PIR	GO:0031209,GO:0000340,GO:0030036,GO:0045010,GO:0000902,GO:0006417,GO:0010090	SCAR complex|RNA 7-methylguanosine cap binding|actin cytoskeleton organization|actin nucleation|cell morphogenesis|regulation of translation|trichome morphogenesis	path:dct03013	RNA transport
circRNA_0681|NW_021318775.1:939039_946163_-	NW_021318775.1	-	939039	946163	7125	428	sense-overlapping	XM_028693516.1	NW_021318775.1:837471_1011355_-	4167	110092698	LOC110092698	protein PIR	GO:0031209,GO:0000340,GO:0030036,GO:0045010,GO:0000902,GO:0006417,GO:0010090	SCAR complex|RNA 7-methylguanosine cap binding|actin cytoskeleton organization|actin nucleation|cell morphogenesis|regulation of translation|trichome morphogenesis	path:dct03013	RNA transport
circRNA_0682|NW_021318775.1:1139449_1139718_+	NW_021318775.1	+	1139449	1139718	270	188	sense-overlapping	XM_020817332.2	NW_021318775.1:1114202_1146454_+	1894	110092685	LOC110092685	uncharacterized LOC110092685	GO:0005829,GO:0005634,GO:0052735,GO:0030488	cytosol|nucleus|tRNA (cytosine-3-)-methyltransferase activity|tRNA methylation	-	-
circRNA_0683|NW_021318775.1:1593076_1593598_-	NW_021318775.1	-	1593076	1593598	523	439	sense-overlapping	XM_020834393.2	NW_021318775.1:1589850_1651709_-	6273	110105040	LOC110105040	protein CHROMATIN REMODELING 5	GO:0005634,GO:0009506,GO:0005524,GO:0003677,GO:0004386,GO:0006325	nucleus|plasmodesma|ATP binding|DNA binding|helicase activity|chromatin organization	-	-
circRNA_0684|NW_021318775.1:1614336_1617295_-	NW_021318775.1	-	1614336	1617295	2960	577	sense-overlapping	XM_020834393.2	NW_021318775.1:1589850_1651709_-	6273	110105040	LOC110105040	protein CHROMATIN REMODELING 5	GO:0005634,GO:0009506,GO:0005524,GO:0003677,GO:0004386,GO:0006325	nucleus|plasmodesma|ATP binding|DNA binding|helicase activity|chromatin organization	-	-
circRNA_0685|NW_021318775.1:1633788_1636645_-	NW_021318775.1	-	1633788	1636645	2858	280	sense-overlapping	XM_020834393.2	NW_021318775.1:1589850_1651709_-	6273	110105040	LOC110105040	protein CHROMATIN REMODELING 5	GO:0005634,GO:0009506,GO:0005524,GO:0003677,GO:0004386,GO:0006325	nucleus|plasmodesma|ATP binding|DNA binding|helicase activity|chromatin organization	-	-
circRNA_0686|NW_021318775.1:1647784_1650673_-	NW_021318775.1	-	1647784	1650673	2890	1564	sense-overlapping	XM_020834393.2	NW_021318775.1:1589850_1651709_-	6273	110105040	LOC110105040	protein CHROMATIN REMODELING 5	GO:0005634,GO:0009506,GO:0005524,GO:0003677,GO:0004386,GO:0006325	nucleus|plasmodesma|ATP binding|DNA binding|helicase activity|chromatin organization	-	-
circRNA_0687|NW_021318775.1:1648003_1648227_-	NW_021318775.1	-	1648003	1648227	225	225	exonic	XM_020834393.2	NW_021318775.1:1589850_1651709_-	6273	110105040	LOC110105040	protein CHROMATIN REMODELING 5	GO:0005634,GO:0009506,GO:0005524,GO:0003677,GO:0004386,GO:0006325	nucleus|plasmodesma|ATP binding|DNA binding|helicase activity|chromatin organization	-	-
circRNA_0688|NW_021318775.1:1762590_1762932_+	NW_021318775.1	+	1762590	1762932	343	226	sense-overlapping	XM_028693518.1	NW_021318775.1:1732567_1765100_+	1139	110105041	LOC110105041	phytochromobilin:ferredoxin oxidoreductase, chloroplastic	GO:0009507,GO:0050897,GO:0050619,GO:0010019,GO:0010024	chloroplast|cobalt ion binding|phytochromobilin:ferredoxin oxidoreductase activity|chloroplast-nucleus signaling pathway|phytochromobilin biosynthetic process	path:dct00860,path:dct01110	Porphyrin and chlorophyll metabolism|Biosynthesis of secondary metabolites
circRNA_0689|NW_021318775.1:1849677_1851016_+	NW_021318775.1	+	1849677	1851016	1340	295	sense-overlapping	XM_020834421.2	NW_021318775.1:1844179_1851711_+	1251	110105060	LOC110105060	sanguinarine reductase	GO:0016491,GO:0009636	oxidoreductase activity|response to toxic substance	-	-
circRNA_0690|NW_021318775.1:2098883_2107243_+	NW_021318775.1	+	2098883	2107243	8361	648	sense-overlapping	XM_020834417.2	NW_021318775.1:2088016_2133021_+	3096	110105057	LOC110105057	exocyst complex component 5	GO:0005829,GO:0000145,GO:0070062,GO:0016020,GO:0005886,GO:0009506,GO:0060321,GO:0006887,GO:0006893,GO:0048278	cytosol|exocyst|extracellular exosome|membrane|plasma membrane|plasmodesma|acceptance of pollen|exocytosis|Golgi to plasma membrane transport|vesicle docking	-	-
circRNA_0691|NW_021318775.1:2106521_2107243_+	NW_021318775.1	+	2106521	2107243	723	436	sense-overlapping	XM_020834417.2	NW_021318775.1:2088016_2133021_+	3096	110105057	LOC110105057	exocyst complex component 5	GO:0005829,GO:0000145,GO:0070062,GO:0016020,GO:0005886,GO:0009506,GO:0060321,GO:0006887,GO:0006893,GO:0048278	cytosol|exocyst|extracellular exosome|membrane|plasma membrane|plasmodesma|acceptance of pollen|exocytosis|Golgi to plasma membrane transport|vesicle docking	-	-
circRNA_0692|NW_021318775.1:2106521_2116881_+	NW_021318775.1	+	2106521	2116881	10361	696	sense-overlapping	XM_020834417.2	NW_021318775.1:2088016_2133021_+	3096	110105057	LOC110105057	exocyst complex component 5	GO:0005829,GO:0000145,GO:0070062,GO:0016020,GO:0005886,GO:0009506,GO:0060321,GO:0006887,GO:0006893,GO:0048278	cytosol|exocyst|extracellular exosome|membrane|plasma membrane|plasmodesma|acceptance of pollen|exocytosis|Golgi to plasma membrane transport|vesicle docking	-	-
circRNA_0693|NW_021318775.1:2106529_2107243_+	NW_021318775.1	+	2106529	2107243	715	428	sense-overlapping	XM_020834417.2	NW_021318775.1:2088016_2133021_+	3096	110105057	LOC110105057	exocyst complex component 5	GO:0005829,GO:0000145,GO:0070062,GO:0016020,GO:0005886,GO:0009506,GO:0060321,GO:0006887,GO:0006893,GO:0048278	cytosol|exocyst|extracellular exosome|membrane|plasma membrane|plasmodesma|acceptance of pollen|exocytosis|Golgi to plasma membrane transport|vesicle docking	-	-
circRNA_0694|NW_021318775.1:2116523_2116881_+	NW_021318775.1	+	2116523	2116881	359	260	sense-overlapping	XM_020834417.2	NW_021318775.1:2088016_2133021_+	3096	110105057	LOC110105057	exocyst complex component 5	GO:0005829,GO:0000145,GO:0070062,GO:0016020,GO:0005886,GO:0009506,GO:0060321,GO:0006887,GO:0006893,GO:0048278	cytosol|exocyst|extracellular exosome|membrane|plasma membrane|plasmodesma|acceptance of pollen|exocytosis|Golgi to plasma membrane transport|vesicle docking	-	-
circRNA_0695|NW_021318775.1:2429087_2430544_-	NW_021318775.1	-	2429087	2430544	1458	612	sense-overlapping	XM_020834420.2	NW_021318775.1:2428787_2438617_-	1658	110105059	LOC110105059	rhodanese-like domain-containing protein 7, transcript variant X1	-	-	-	-
circRNA_0696|NW_021318776.1:51636_52121_-	NW_021318776.1	-	51636	52121	486	486	sense-overlapping	XM_020828471.2	NW_021318776.1:36545_84791_-	2109	110100796	LOC110100796	chaperone protein DnaJ-like, transcript variant X2	GO:0009535,GO:0005737,GO:0005524,GO:0031072,GO:0046872,GO:0051082,GO:0051085,GO:0042026,GO:0009408	chloroplast thylakoid membrane|cytoplasm|ATP binding|heat shock protein binding|metal ion binding|unfolded protein binding|chaperone cofactor-dependent protein refolding|protein refolding|response to heat	-	-
circRNA_0697|NW_021318776.1:51636_53031_-	NW_021318776.1	-	51636	53031	1396	291	sense-overlapping	XM_020828471.2	NW_021318776.1:36545_84791_-	2109	110100796	LOC110100796	chaperone protein DnaJ-like, transcript variant X2	GO:0009535,GO:0005737,GO:0005524,GO:0031072,GO:0046872,GO:0051082,GO:0051085,GO:0042026,GO:0009408	chloroplast thylakoid membrane|cytoplasm|ATP binding|heat shock protein binding|metal ion binding|unfolded protein binding|chaperone cofactor-dependent protein refolding|protein refolding|response to heat	-	-
circRNA_0698|NW_021318776.1:51636_66541_-	NW_021318776.1	-	51636	66541	14906	467	sense-overlapping	XM_020828471.2	NW_021318776.1:36545_84791_-	2109	110100796	LOC110100796	chaperone protein DnaJ-like, transcript variant X2	GO:0009535,GO:0005737,GO:0005524,GO:0031072,GO:0046872,GO:0051082,GO:0051085,GO:0042026,GO:0009408	chloroplast thylakoid membrane|cytoplasm|ATP binding|heat shock protein binding|metal ion binding|unfolded protein binding|chaperone cofactor-dependent protein refolding|protein refolding|response to heat	-	-
circRNA_0699|NW_021318776.1:52902_66541_-	NW_021318776.1	-	52902	66541	13640	306	sense-overlapping	XM_020828471.2	NW_021318776.1:36545_84791_-	2109	110100796	LOC110100796	chaperone protein DnaJ-like, transcript variant X2	GO:0009535,GO:0005737,GO:0005524,GO:0031072,GO:0046872,GO:0051082,GO:0051085,GO:0042026,GO:0009408	chloroplast thylakoid membrane|cytoplasm|ATP binding|heat shock protein binding|metal ion binding|unfolded protein binding|chaperone cofactor-dependent protein refolding|protein refolding|response to heat	-	-
circRNA_0700|NW_021318776.1:164384_168794_+	NW_021318776.1	+	164384	168794	4411	409	sense-overlapping	XM_020828483.2	NW_021318776.1:104286_171623_+	3640	110100808	LOC110100808	rho GTPase-activating protein REN1	GO:0045177,GO:0016324,GO:0005938,GO:0070382,GO:0090406,GO:0005096,GO:0017048,GO:0090630,GO:0035024,GO:0009846,GO:0009865,GO:0048868,GO:0009860,GO:0043547,GO:0040008,GO:0007165	apical part of cell|apical plasma membrane|cell cortex|exocytic vesicle|pollen tube|GTPase activator activity|Rho GTPase binding|activation of GTPase activity|negative regulation of Rho protein signal transduction|pollen germination|pollen tube adhesion|pollen tube development|pollen tube growth|positive regulation of GTPase activity|regulation of growth|signal transduction	-	-
circRNA_0701|NW_021318776.1:311928_312255_+	NW_021318776.1	+	311928	312255	328	237	sense-overlapping	XM_020828542.2	NW_021318776.1:300603_333128_+	1440	110100847	LOC110100847	uncharacterized protein At2g37660, chloroplastic, transcript variant X1	GO:0048046,GO:0009507,GO:0009570,GO:0005783,GO:0009579,GO:0005507,GO:0042742	apoplast|chloroplast|chloroplast stroma|endoplasmic reticulum|thylakoid|copper ion binding|defense response to bacterium	-	-
circRNA_0702|NW_021318777.1:649233_649372_-	NW_021318777.1	-	649233	649372	140	140	antisense	XM_020849212.2	NW_021318777.1:646156_650108_+	2177	110115835	LOC110115835	heat shock cognate 70 kDa protein 2	GO:0005737,GO:0005524,GO:0016887,GO:0042623,GO:0031072,GO:0051787,GO:0044183,GO:0051082,GO:0034605,GO:0034620,GO:0051085,GO:0042026,GO:0006986	cytoplasm|ATP binding|ATPase activity|ATPase activity, coupled|heat shock protein binding|misfolded protein binding|protein folding chaperone|unfolded protein binding|cellular response to heat|cellular response to unfolded protein|chaperone cofactor-dependent protein refolding|protein refolding|response to unfolded protein	path:dct03040,path:dct04141,path:dct04144	Spliceosome|Protein processing in endoplasmic reticulum|Endocytosis
circRNA_0703|NW_021318777.1:817408_818038_-	NW_021318777.1	-	817408	818038	631	268	sense-overlapping	XM_020849206.2	NW_021318777.1:813460_868010_-	6852	110115830	LOC110115830	E3 ubiquitin-protein ligase PRT6	GO:0005737,GO:0000151,GO:0061630,GO:0004842,GO:0008270,GO:0050832,GO:0016567,GO:0050994,GO:0010029,GO:0009737,GO:0006511,GO:0071596	cytoplasm|ubiquitin ligase complex|ubiquitin protein ligase activity|ubiquitin-protein transferase activity|zinc ion binding|defense response to fungus|protein ubiquitination|regulation of lipid catabolic process|regulation of seed germination|response to abscisic acid|ubiquitin-dependent protein catabolic process|ubiquitin-dependent protein catabolic process via the N-end rule pathway	-	-
circRNA_0704|NW_021318777.1:839361_840019_-	NW_021318777.1	-	839361	840019	659	659	exonic	XM_020849206.2	NW_021318777.1:813460_868010_-	6852	110115830	LOC110115830	E3 ubiquitin-protein ligase PRT6	GO:0005737,GO:0000151,GO:0061630,GO:0004842,GO:0008270,GO:0050832,GO:0016567,GO:0050994,GO:0010029,GO:0009737,GO:0006511,GO:0071596	cytoplasm|ubiquitin ligase complex|ubiquitin protein ligase activity|ubiquitin-protein transferase activity|zinc ion binding|defense response to fungus|protein ubiquitination|regulation of lipid catabolic process|regulation of seed germination|response to abscisic acid|ubiquitin-dependent protein catabolic process|ubiquitin-dependent protein catabolic process via the N-end rule pathway	-	-
circRNA_0705|NW_021318777.1:1482181_1483036_+	NW_021318777.1	+	1482181	1483036	856	782	sense-overlapping	XM_028693545.1	NW_021318777.1:1388082_1538428_+	7895	110102932	LOC110102932	uncharacterized LOC110102932, transcript variant X3	-	-	-	-
circRNA_0706|NW_021318777.1:1532673_1534958_+	NW_021318777.1	+	1532673	1534958	2286	374	sense-overlapping	XM_028693545.1	NW_021318777.1:1388082_1538428_+	7895	110102932	LOC110102932	uncharacterized LOC110102932, transcript variant X3	-	-	-	-
circRNA_0707|NW_021318777.1:3101987_3103038_-	NW_021318777.1	-	3101987	3103038	1052	618	sense-overlapping	XM_020841067.2	NW_021318777.1:3068811_3136706_-	4573	110109857	LOC110109857	DExH-box ATP-dependent RNA helicase DExH3	GO:0005634,GO:0005524,GO:0003723,GO:0003724	nucleus|ATP binding|RNA binding|RNA helicase activity	path:dct03018	RNA degradation
circRNA_0708|NW_021318777.1:3111247_3111776_-	NW_021318777.1	-	3111247	3111776	530	441	sense-overlapping	XM_020841067.2	NW_021318777.1:3068811_3136706_-	4573	110109857	LOC110109857	DExH-box ATP-dependent RNA helicase DExH3	GO:0005634,GO:0005524,GO:0003723,GO:0003724	nucleus|ATP binding|RNA binding|RNA helicase activity	path:dct03018	RNA degradation
circRNA_0709|NW_021318777.1:3112325_3113023_-	NW_021318777.1	-	3112325	3113023	699	480	sense-overlapping	XM_020841067.2	NW_021318777.1:3068811_3136706_-	4573	110109857	LOC110109857	DExH-box ATP-dependent RNA helicase DExH3	GO:0005634,GO:0005524,GO:0003723,GO:0003724	nucleus|ATP binding|RNA binding|RNA helicase activity	path:dct03018	RNA degradation
circRNA_0710|NW_021318783.1:843_1201_-	NW_021318783.1	-	843	1201	359	359	sense-overlapping
circRNA_0711|NW_021318785.1:168612_169321_+	NW_021318785.1	+	168612	169321	710	318	sense-overlapping	XM_020841163.2	NW_021318785.1:160998_210701_+	3850	110109935	LOC110109935	zinc transporter ZTP29	GO:0005789,GO:0016021,GO:0005385,GO:0071577	endoplasmic reticulum membrane|integral component of membrane|zinc ion transmembrane transporter activity|zinc ion transmembrane transport	-	-
circRNA_0712|NW_021318785.1:1448908_1449838_+	NW_021318785.1	+	1448908	1449838	931	521	sense-overlapping	XM_020825149.2	NW_021318785.1:1436536_1463990_+	2395	110098330	LOC110098330	3-phosphoinositide-dependent protein kinase 1	GO:0005737,GO:0016020,GO:0005524,GO:0016301,GO:0070300,GO:0035091,GO:0004672,GO:0004674,GO:0035556,GO:0018105,GO:0045860,GO:0046777	cytoplasm|membrane|ATP binding|kinase activity|phosphatidic acid binding|phosphatidylinositol binding|protein kinase activity|protein serine/threonine kinase activity|intracellular signal transduction|peptidyl-serine phosphorylation|positive regulation of protein kinase activity|protein autophosphorylation	-	-
circRNA_0713|NW_021318785.1:1448908_1458900_+	NW_021318785.1	+	1448908	1458900	9993	687	sense-overlapping	XM_020825149.2	NW_021318785.1:1436536_1463990_+	2395	110098330	LOC110098330	3-phosphoinositide-dependent protein kinase 1	GO:0005737,GO:0016020,GO:0005524,GO:0016301,GO:0070300,GO:0035091,GO:0004672,GO:0004674,GO:0035556,GO:0018105,GO:0045860,GO:0046777	cytoplasm|membrane|ATP binding|kinase activity|phosphatidic acid binding|phosphatidylinositol binding|protein kinase activity|protein serine/threonine kinase activity|intracellular signal transduction|peptidyl-serine phosphorylation|positive regulation of protein kinase activity|protein autophosphorylation	-	-
circRNA_0714|NW_021318785.1:2876873_2877274_+	NW_021318785.1	+	2876873	2877274	402	194	sense-overlapping	XM_020849291.2	NW_021318785.1:2869152_2909725_+	3040	110115885	LOC110115885	protein DEFECTIVE IN EXINE FORMATION 1, transcript variant X1	GO:0005829,GO:0005783,GO:0016021,GO:0016020,GO:0005886,GO:0005509,GO:0071555,GO:0010584,GO:0010208	cytosol|endoplasmic reticulum|integral component of membrane|membrane|plasma membrane|calcium ion binding|cell wall organization|pollen exine formation|pollen wall assembly	-	-
circRNA_0715|NW_021318785.1:2890746_2892676_+	NW_021318785.1	+	2890746	2892676	1931	937	sense-overlapping	XM_020849291.2	NW_021318785.1:2869152_2909725_+	3040	110115885	LOC110115885	protein DEFECTIVE IN EXINE FORMATION 1, transcript variant X1	GO:0005829,GO:0005783,GO:0016021,GO:0016020,GO:0005886,GO:0005509,GO:0071555,GO:0010584,GO:0010208	cytosol|endoplasmic reticulum|integral component of membrane|membrane|plasma membrane|calcium ion binding|cell wall organization|pollen exine formation|pollen wall assembly	-	-
circRNA_0716|NW_021318787.1:20469_40493_-	NW_021318787.1	-	20469	40493	20025	341	sense-overlapping	XM_020839181.2	NW_021318787.1:11689_60013_-	2164	110108508	LOC110108508	CLP protease regulatory subunit CLPX1, mitochondrial	GO:0005759,GO:0005739,GO:0005524,GO:0004176,GO:0051082,GO:0030163,GO:0006457	mitochondrial matrix|mitochondrion|ATP binding|ATP-dependent peptidase activity|unfolded protein binding|protein catabolic process|protein folding	-	-
circRNA_0717|NW_021318787.1:51418_51682_-	NW_021318787.1	-	51418	51682	265	163	sense-overlapping	XM_020839181.2	NW_021318787.1:11689_60013_-	2164	110108508	LOC110108508	CLP protease regulatory subunit CLPX1, mitochondrial	GO:0005759,GO:0005739,GO:0005524,GO:0004176,GO:0051082,GO:0030163,GO:0006457	mitochondrial matrix|mitochondrion|ATP binding|ATP-dependent peptidase activity|unfolded protein binding|protein catabolic process|protein folding	-	-
circRNA_0718|NW_021318787.1:510234_510584_-	NW_021318787.1	-	510234	510584	351	266	sense-overlapping	XM_020828613.2	NW_021318787.1:506805_523617_-	880	110100895	LOC110100895	ubiquitin-conjugating enzyme E2 variant 1C	GO:0005829,GO:0005783,GO:0005634,GO:0031372,GO:0061631,GO:0006301,GO:0070534	cytosol|endoplasmic reticulum|nucleus|UBC13-MMS2 complex|ubiquitin conjugating enzyme activity|postreplication repair|protein K63-linked ubiquitination	-	-
circRNA_0719|NW_021318787.1:587645_589516_+	NW_021318787.1	+	587645	589516	1872	277	sense-overlapping	XM_020828602.2	NW_021318787.1:566611_595884_+	1699	110100889	LOC110100889	RRP15-like protein, transcript variant X1	-	-	-	-
circRNA_0720|NW_021318787.1:712086_717647_-	NW_021318787.1	-	712086	717647	5562	273	sense-overlapping	XM_028693594.1	NW_021318787.1:689445_760194_-	1848	110100890	LOC110100890	mitochondrial intermediate peptidase, mitochondrial, transcript variant X5	GO:0009535,GO:0005759,GO:0005739,GO:0004177,GO:0046872,GO:0004222,GO:0006518,GO:0006627,GO:0006508	chloroplast thylakoid membrane|mitochondrial matrix|mitochondrion|aminopeptidase activity|metal ion binding|metalloendopeptidase activity|peptide metabolic process|protein processing involved in protein targeting to mitochondrion|proteolysis	-	-
circRNA_0721|NW_021318787.1:740085_743391_-	NW_021318787.1	-	740085	743391	3307	290	sense-overlapping	XM_020828605.2	NW_021318787.1:689445_760445_-	2237	110100890	LOC110100890	mitochondrial intermediate peptidase, mitochondrial, transcript variant X3	GO:0009535,GO:0005759,GO:0005739,GO:0004177,GO:0046872,GO:0004222,GO:0006518,GO:0006627,GO:0006508	chloroplast thylakoid membrane|mitochondrial matrix|mitochondrion|aminopeptidase activity|metal ion binding|metalloendopeptidase activity|peptide metabolic process|protein processing involved in protein targeting to mitochondrion|proteolysis	-	-
circRNA_0722|NW_021318787.1:740085_743420_-	NW_021318787.1	-	740085	743420	3336	319	sense-overlapping	XM_020828605.2	NW_021318787.1:689445_760445_-	2237	110100890	LOC110100890	mitochondrial intermediate peptidase, mitochondrial, transcript variant X3	GO:0009535,GO:0005759,GO:0005739,GO:0004177,GO:0046872,GO:0004222,GO:0006518,GO:0006627,GO:0006508	chloroplast thylakoid membrane|mitochondrial matrix|mitochondrion|aminopeptidase activity|metal ion binding|metalloendopeptidase activity|peptide metabolic process|protein processing involved in protein targeting to mitochondrion|proteolysis	-	-
circRNA_0723|NW_021318787.1:1143926_1145019_+	NW_021318787.1	+	1143926	1145019	1094	657	sense-overlapping	XM_020817198.2	NW_021318787.1:1138824_1145693_+	1515	110092584	LOC110092584	methylthioribose-1-phosphate isomerase	GO:0005737,GO:0005634,GO:0046523,GO:0019509,GO:0019284	cytoplasm|nucleus|S-methyl-5-thioribose-1-phosphate isomerase activity|L-methionine salvage from methylthioadenosine|L-methionine salvage from S-adenosylmethionine	path:dct00270,path:dct01100	Cysteine and methionine metabolism|Metabolic pathways
circRNA_0724|NW_021318787.1:2000822_2008018_+	NW_021318787.1	+	2000822	2008018	7197	5602	sense-overlapping	XM_028693597.1	NW_021318787.1:1981962_2003230_+	1474	110095210	LOC110095210	serine/threonine-protein kinase Aurora-1, transcript variant X2	GO:0009504,GO:0032133,GO:0000780,GO:0005874,GO:0031965,GO:0005730,GO:0005634,GO:0009524,GO:0005819,GO:0005876,GO:0051233,GO:0031616,GO:0005524,GO:0035175,GO:0035174,GO:0004674,GO:0051301,GO:0016572,GO:0007052,GO:0032465	cell plate|chromosome passenger complex|condensed nuclear chromosome, centromeric region|microtubule|nuclear membrane|nucleolus|nucleus|phragmoplast|spindle|spindle microtubule|spindle midzone|spindle pole centrosome|ATP binding|histone kinase activity (H3-S10 specific)|histone serine kinase activity|protein serine/threonine kinase activity|cell division|histone phosphorylation|mitotic spindle or…	-	-
circRNA_0725|NW_021318787.1:2002141_2008587_+	NW_021318787.1	+	2002141	2008587	6447	3147	sense-overlapping	XM_020820667.2	NW_021318787.1:2004546_2009257_+	1135	110095222	LOC110095222	serine/threonine-protein kinase Aurora-1-like	GO:0009504,GO:0032133,GO:0000780,GO:0005874,GO:0031965,GO:0005730,GO:0005634,GO:0009524,GO:0005819,GO:0005876,GO:0051233,GO:0031616,GO:0005524,GO:0035175,GO:0035174,GO:0004674,GO:0051301,GO:0016572,GO:0007052,GO:0032465	cell plate|chromosome passenger complex|condensed nuclear chromosome, centromeric region|microtubule|nuclear membrane|nucleolus|nucleus|phragmoplast|spindle|spindle microtubule|spindle midzone|spindle pole centrosome|ATP binding|histone kinase activity (H3-S10 specific)|histone serine kinase activity|protein serine/threonine kinase activity|cell division|histone phosphorylation|mitotic spindle or…	-	-
circRNA_0726|NW_021318787.1:2111091_2125386_-	NW_021318787.1	-	2111091	2125386	14296	14035	sense-overlapping	XM_020838464.2	NW_021318787.1:2068935_2112010_-	1410	110107985	LOC110107985	zinc finger protein 385D-like	-	-	-	-
circRNA_0727|NW_021318790.1:557701_558342_+	NW_021318790.1	+	557701	558342	642	413	sense-overlapping	XM_020829709.2	NW_021318790.1:551003_562536_+	2169	110101707	LOC110101707	calcium-dependent protein kinase 24	GO:0005737,GO:0005634,GO:0005524,GO:0005509,GO:0010857,GO:0009931,GO:0005516,GO:0004683,GO:0035556,GO:0018105,GO:0046777	cytoplasm|nucleus|ATP binding|calcium ion binding|calcium-dependent protein kinase activity|calcium-dependent protein serine/threonine kinase activity|calmodulin binding|calmodulin-dependent protein kinase activity|intracellular signal transduction|peptidyl-serine phosphorylation|protein autophosphorylation	path:dct04626	Plant-pathogen interaction
circRNA_0728|NW_021318795.1:240486_241233_+	NW_021318795.1	+	240486	241233	748	472	sense-overlapping	XM_020818524.2	NW_021318795.1:238461_244135_+	2687	110093591	LOC110093591	rab9 effector protein with kelch motifs	GO:0005829,GO:0000062,GO:0008289,GO:0006869,GO:0001666,GO:0009416	cytosol|fatty-acyl-CoA binding|lipid binding|lipid transport|response to hypoxia|response to light stimulus	-	-
circRNA_0729|NW_021318795.1:259893_260097_-	NW_021318795.1	-	259893	260097	205	109	sense-overlapping	XM_020818460.2	NW_021318795.1:246494_276135_-	2013	110093540	LOC110093540	phospholipase A(1) LCAT3	GO:0005783,GO:0031090,GO:0052740,GO:0008374,GO:0052739,GO:0008970,GO:0016042	endoplasmic reticulum|organelle membrane|1-acyl-2-lysophosphatidylserine acylhydrolase activity|O-acyltransferase activity|phosphatidylserine 1-acylhydrolase activity|phospholipase A1 activity|lipid catabolic process	path:dct00564,path:dct00592,path:dct01100,path:dct01110	Glycerophospholipid metabolism|alpha-Linolenic acid metabolism|Metabolic pathways|Biosynthesis of secondary metabolites
circRNA_0730|NW_021318795.1:259893_266997_-	NW_021318795.1	-	259893	266997	7105	444	sense-overlapping	XM_020818460.2	NW_021318795.1:246494_276135_-	2013	110093540	LOC110093540	phospholipase A(1) LCAT3	GO:0005783,GO:0031090,GO:0052740,GO:0008374,GO:0052739,GO:0008970,GO:0016042	endoplasmic reticulum|organelle membrane|1-acyl-2-lysophosphatidylserine acylhydrolase activity|O-acyltransferase activity|phosphatidylserine 1-acylhydrolase activity|phospholipase A1 activity|lipid catabolic process	path:dct00564,path:dct00592,path:dct01100,path:dct01110	Glycerophospholipid metabolism|alpha-Linolenic acid metabolism|Metabolic pathways|Biosynthesis of secondary metabolites
circRNA_0731|NW_021318795.1:271509_272662_-	NW_021318795.1	-	271509	272662	1154	417	sense-overlapping	XM_020818460.2	NW_021318795.1:246494_276135_-	2013	110093540	LOC110093540	phospholipase A(1) LCAT3	GO:0005783,GO:0031090,GO:0052740,GO:0008374,GO:0052739,GO:0008970,GO:0016042	endoplasmic reticulum|organelle membrane|1-acyl-2-lysophosphatidylserine acylhydrolase activity|O-acyltransferase activity|phosphatidylserine 1-acylhydrolase activity|phospholipase A1 activity|lipid catabolic process	path:dct00564,path:dct00592,path:dct01100,path:dct01110	Glycerophospholipid metabolism|alpha-Linolenic acid metabolism|Metabolic pathways|Biosynthesis of secondary metabolites
circRNA_0732|NW_021318795.1:288093_313561_-	NW_021318795.1	-	288093	313561	25469	19109	sense-overlapping	XM_020818471.2	NW_021318795.1:282018_295409_-	1825	110093550	LOC110093550	2,3-dimethylmalate lyase	GO:0009507,GO:0009570,GO:0008807	chloroplast|chloroplast stroma|carboxyvinyl-carboxyphosphonate phosphorylmutase activity	-	-
circRNA_0733|NW_021318796.1:68003_68502_+	NW_021318796.1	+	68003	68502	500	264	sense-overlapping	XM_020823111.2	NW_021318796.1:37836_130831_+	4003	110096946	LOC110096946	exportin-4	-	-	-	-
circRNA_0734|NW_021318796.1:195164_222897_+	NW_021318796.1	+	195164	222897	27734	682	sense-overlapping	XM_020823115.2	NW_021318796.1:165753_247944_+	3415	110096948	LOC110096948	transportin MOS14, transcript variant X1	GO:0005737,GO:0005634,GO:0008536,GO:0006606,GO:0043484	cytoplasm|nucleus|Ran GTPase binding|protein import into nucleus|regulation of RNA splicing	-	-
circRNA_0735|NW_021318796.1:221042_221719_+	NW_021318796.1	+	221042	221719	678	379	sense-overlapping	XM_020823115.2	NW_021318796.1:165753_247944_+	3415	110096948	LOC110096948	transportin MOS14, transcript variant X1	GO:0005737,GO:0005634,GO:0008536,GO:0006606,GO:0043484	cytoplasm|nucleus|Ran GTPase binding|protein import into nucleus|regulation of RNA splicing	-	-
circRNA_0736|NW_021318796.1:229884_230221_+	NW_021318796.1	+	229884	230221	338	230	sense-overlapping	XM_020823115.2	NW_021318796.1:165753_247944_+	3415	110096948	LOC110096948	transportin MOS14, transcript variant X1	GO:0005737,GO:0005634,GO:0008536,GO:0006606,GO:0043484	cytoplasm|nucleus|Ran GTPase binding|protein import into nucleus|regulation of RNA splicing	-	-
circRNA_0737|NW_021318796.1:229906_230221_+	NW_021318796.1	+	229906	230221	316	208	sense-overlapping	XM_020823115.2	NW_021318796.1:165753_247944_+	3415	110096948	LOC110096948	transportin MOS14, transcript variant X1	GO:0005737,GO:0005634,GO:0008536,GO:0006606,GO:0043484	cytoplasm|nucleus|Ran GTPase binding|protein import into nucleus|regulation of RNA splicing	-	-
circRNA_0738|NW_021318796.1:229906_231826_+	NW_021318796.1	+	229906	231826	1921	630	sense-overlapping	XM_020823115.2	NW_021318796.1:165753_247944_+	3415	110096948	LOC110096948	transportin MOS14, transcript variant X1	GO:0005737,GO:0005634,GO:0008536,GO:0006606,GO:0043484	cytoplasm|nucleus|Ran GTPase binding|protein import into nucleus|regulation of RNA splicing	-	-
circRNA_0739|NW_021318796.1:229906_236112_+	NW_021318796.1	+	229906	236112	6207	989	sense-overlapping	XM_020823115.2	NW_021318796.1:165753_247944_+	3415	110096948	LOC110096948	transportin MOS14, transcript variant X1	GO:0005737,GO:0005634,GO:0008536,GO:0006606,GO:0043484	cytoplasm|nucleus|Ran GTPase binding|protein import into nucleus|regulation of RNA splicing	-	-
circRNA_0740|NW_021318796.1:235591_236112_+	NW_021318796.1	+	235591	236112	522	359	sense-overlapping	XM_020823115.2	NW_021318796.1:165753_247944_+	3415	110096948	LOC110096948	transportin MOS14, transcript variant X1	GO:0005737,GO:0005634,GO:0008536,GO:0006606,GO:0043484	cytoplasm|nucleus|Ran GTPase binding|protein import into nucleus|regulation of RNA splicing	-	-
circRNA_0741|NW_021318796.1:288663_288960_+	NW_021318796.1	+	288663	288960	298	298	exonic	XM_020823118.2	NW_021318796.1:281218_289159_+	1056	110096950	LOC110096950	uncharacterized LOC110096950	-	-	-	-
circRNA_0742|NW_021318796.1:399051_399272_+	NW_021318796.1	+	399051	399272	222	222	exonic	XM_020823124.1	NW_021318796.1:384526_427300_+	2704	110096955	LOC110096955	cryptochrome-1, transcript variant X1	GO:0005623,GO:0005737,GO:0016604,GO:0005634,GO:0016605,GO:0005773,GO:0005524,GO:0009882,GO:0071949,GO:0042802,GO:0046872,GO:0009785,GO:0006325,GO:0006338,GO:0010617,GO:0007623,GO:0051607,GO:0072387,GO:0048574,GO:0016310,GO:0009638,GO:0009911,GO:2000379,GO:0018298,GO:0042752,GO:0009909,GO:1901371,GO:0010075,GO:2000028,GO:0009646,GO:0009637,GO:0009416,GO:0010244,GO:1902347,GO:0009414,GO:0010118	cell|cytoplasm|nuclear body|nucleus|PML body|vacuole|ATP binding|blue light photoreceptor activity|FAD binding|identical protein binding|metal ion binding|blue light signaling pathway|chromatin organization|chromatin remodeling|circadian regulation of calcium ion oscillation|circadian rhythm|defense response to virus|flavin adenine dinucleotide metabolic process|long-day photoperiodism, flowering…	path:dct04712	Circadian rhythm - plant
circRNA_0743|NW_021318796.1:413185_413894_+	NW_021318796.1	+	413185	413894	710	710	exonic	XM_020823124.1	NW_021318796.1:384526_427300_+	2704	110096955	LOC110096955	cryptochrome-1, transcript variant X1	GO:0005623,GO:0005737,GO:0016604,GO:0005634,GO:0016605,GO:0005773,GO:0005524,GO:0009882,GO:0071949,GO:0042802,GO:0046872,GO:0009785,GO:0006325,GO:0006338,GO:0010617,GO:0007623,GO:0051607,GO:0072387,GO:0048574,GO:0016310,GO:0009638,GO:0009911,GO:2000379,GO:0018298,GO:0042752,GO:0009909,GO:1901371,GO:0010075,GO:2000028,GO:0009646,GO:0009637,GO:0009416,GO:0010244,GO:1902347,GO:0009414,GO:0010118	cell|cytoplasm|nuclear body|nucleus|PML body|vacuole|ATP binding|blue light photoreceptor activity|FAD binding|identical protein binding|metal ion binding|blue light signaling pathway|chromatin organization|chromatin remodeling|circadian regulation of calcium ion oscillation|circadian rhythm|defense response to virus|flavin adenine dinucleotide metabolic process|long-day photoperiodism, flowering…	path:dct04712	Circadian rhythm - plant
circRNA_0744|NW_021318796.1:825631_826777_-	NW_021318796.1	-	825631	826777	1147	331	sense-overlapping	XM_028693634.1	NW_021318796.1:799591_848022_-	2475	110102825	LOC110102825	uncharacterized LOC110102825, transcript variant X1	GO:0005525	GTP binding	-	-
circRNA_0745|NW_021318796.1:879712_881696_+	NW_021318796.1	+	879712	881696	1985	309	sense-overlapping	XM_020831305.2	NW_021318796.1:879741_896143_+	1724	110102823	LOC110102823	CTD small phosphatase-like protein 2	GO:0005829,GO:1903293,GO:0005886,GO:0004721,GO:0071472,GO:1904262,GO:0061408,GO:0006470,GO:0009651	cytosol|phosphatase complex|plasma membrane|phosphoprotein phosphatase activity|cellular response to salt stress|negative regulation of TORC1 signaling|positive regulation of transcription from RNA polymerase II promoter in response to heat stress|protein dephosphorylation|response to salt stress	-	-
circRNA_0746|NW_021318796.1:879712_888350_+	NW_021318796.1	+	879712	888350	8639	406	sense-overlapping	XM_020831305.2	NW_021318796.1:879741_896143_+	1724	110102823	LOC110102823	CTD small phosphatase-like protein 2	GO:0005829,GO:1903293,GO:0005886,GO:0004721,GO:0071472,GO:1904262,GO:0061408,GO:0006470,GO:0009651	cytosol|phosphatase complex|plasma membrane|phosphoprotein phosphatase activity|cellular response to salt stress|negative regulation of TORC1 signaling|positive regulation of transcription from RNA polymerase II promoter in response to heat stress|protein dephosphorylation|response to salt stress	-	-
circRNA_0747|NW_021318796.1:2017594_2019263_+	NW_021318796.1	+	2017594	2019263	1670	1343	sense-overlapping	XM_020829352.2	NW_021318796.1:1996693_2019882_+	3247	110101442	LOC110101442	ubiquitin carboxyl-terminal hydrolase 23	GO:0004197,GO:0004843,GO:0016579,GO:0006511	cysteine-type endopeptidase activity|thiol-dependent ubiquitin-specific protease activity|protein deubiquitination|ubiquitin-dependent protein catabolic process	-	-
circRNA_0748|NW_021318796.1:2355327_2358667_-	NW_021318796.1	-	2355327	2358667	3341	402	sense-overlapping	XM_020842368.2	NW_021318796.1:2352740_2370581_-	1663	110110747	LOC110110747	transcription factor TGA2.3	GO:0005634,GO:0003700,GO:0043565,GO:0006952,GO:0006351	nucleus|DNA-binding transcription factor activity|sequence-specific DNA binding|defense response|transcription, DNA-templated	path:dct04075	Plant hormone signal transduction
circRNA_0749|NW_021318796.1:2358436_2358667_-	NW_021318796.1	-	2358436	2358667	232	130	sense-overlapping	XM_020842368.2	NW_021318796.1:2352740_2370581_-	1663	110110747	LOC110110747	transcription factor TGA2.3	GO:0005634,GO:0003700,GO:0043565,GO:0006952,GO:0006351	nucleus|DNA-binding transcription factor activity|sequence-specific DNA binding|defense response|transcription, DNA-templated	path:dct04075	Plant hormone signal transduction
circRNA_0750|NW_021318796.1:2358436_2362553_-	NW_021318796.1	-	2358436	2362553	4118	268	sense-overlapping	XM_020842368.2	NW_021318796.1:2352740_2370581_-	1663	110110747	LOC110110747	transcription factor TGA2.3	GO:0005634,GO:0003700,GO:0043565,GO:0006952,GO:0006351	nucleus|DNA-binding transcription factor activity|sequence-specific DNA binding|defense response|transcription, DNA-templated	path:dct04075	Plant hormone signal transduction
circRNA_0751|NW_021318796.1:2432771_2436302_+	NW_021318796.1	+	2432771	2436302	3532	723	sense-overlapping	XM_020842340.2	NW_021318796.1:2416943_2500693_+	3810	110110735	LOC110110735	protein unc-13 homolog	GO:0005737,GO:0005886,GO:0009506,GO:0010118	cytoplasm|plasma membrane|plasmodesma|stomatal movement	-	-
circRNA_0752|NW_021318796.1:2432771_2454731_+	NW_021318796.1	+	2432771	2454731	21961	1006	sense-overlapping	XM_020842340.2	NW_021318796.1:2416943_2500693_+	3810	110110735	LOC110110735	protein unc-13 homolog	GO:0005737,GO:0005886,GO:0009506,GO:0010118	cytoplasm|plasma membrane|plasmodesma|stomatal movement	-	-
circRNA_0753|NW_021318796.1:2474569_2490031_+	NW_021318796.1	+	2474569	2490031	15463	567	sense-overlapping	XM_020842340.2	NW_021318796.1:2416943_2500693_+	3810	110110735	LOC110110735	protein unc-13 homolog	GO:0005737,GO:0005886,GO:0009506,GO:0010118	cytoplasm|plasma membrane|plasmodesma|stomatal movement	-	-
circRNA_0754|NW_021318796.1:2477465_2490031_+	NW_021318796.1	+	2477465	2490031	12567	485	sense-overlapping	XM_020842340.2	NW_021318796.1:2416943_2500693_+	3810	110110735	LOC110110735	protein unc-13 homolog	GO:0005737,GO:0005886,GO:0009506,GO:0010118	cytoplasm|plasma membrane|plasmodesma|stomatal movement	-	-
circRNA_0755|NW_021318796.1:2479208_2490031_+	NW_021318796.1	+	2479208	2490031	10824	8885	sense-overlapping	XM_020842340.2	NW_021318796.1:2416943_2500693_+	3810	110110735	LOC110110735	protein unc-13 homolog	GO:0005737,GO:0005886,GO:0009506,GO:0010118	cytoplasm|plasma membrane|plasmodesma|stomatal movement	-	-
circRNA_0756|NW_021318796.1:2487823_2488064_+	NW_021318796.1	+	2487823	2488064	242	174	sense-overlapping	XM_020842340.2	NW_021318796.1:2416943_2500693_+	3810	110110735	LOC110110735	protein unc-13 homolog	GO:0005737,GO:0005886,GO:0009506,GO:0010118	cytoplasm|plasma membrane|plasmodesma|stomatal movement	-	-
circRNA_0757|NW_021318796.1:2931536_2939123_-	NW_021318796.1	-	2931536	2939123	7588	590	sense-overlapping	XM_020827306.2	NW_021318796.1:2924168_2945459_-	1463	110099963	LOC110099963	UDP-glucuronic acid decarboxylase 6, transcript variant X1	GO:0005737,GO:0005777,GO:0005886,GO:0070403,GO:0048040,GO:0042732,GO:0033320	cytoplasm|peroxisome|plasma membrane|NAD+ binding|UDP-glucuronate decarboxylase activity|D-xylose metabolic process|UDP-D-xylose biosynthetic process	path:dct00520,path:dct01100	Amino sugar and nucleotide sugar metabolism|Metabolic pathways
circRNA_0758|NW_021318796.1:3393379_3398446_-	NW_021318796.1	-	3393379	3398446	5068	457	sense-overlapping	XM_020827217.2	NW_021318796.1:3391444_3410784_-	2941	110099907	LOC110099907	phosphatidylinositol 4-phosphate 5-kinase 9, transcript variant X1	GO:0005829,GO:0016020,GO:0005634,GO:0016308,GO:0005524,GO:0005975,GO:0006520	cytosol|membrane|nucleus|1-phosphatidylinositol-4-phosphate 5-kinase activity|ATP binding|carbohydrate metabolic process|cellular amino acid metabolic process	path:dct00562,path:dct01100,path:dct04070,path:dct04144	Inositol phosphate metabolism|Metabolic pathways|Phosphatidylinositol signaling system|Endocytosis
circRNA_0759|NW_021318796.1:3425499_3425697_-	NW_021318796.1	-	3425499	3425697	199	123	sense-overlapping	XM_020827280.2	NW_021318796.1:3425085_3441992_-	1674	110099942	LOC110099942	malate dehydrogenase [NADP], chloroplastic	GO:0009507,GO:0046554,GO:0005975,GO:0006108	chloroplast|malate dehydrogenase (NADP+) activity|carbohydrate metabolic process|malate metabolic process	path:dct00620,path:dct00710,path:dct01100,path:dct01200	Pyruvate metabolism|Carbon fixation in photosynthetic organisms|Metabolic pathways|Carbon metabolism
circRNA_0760|NW_021318796.1:3669875_3670194_-	NW_021318796.1	-	3669875	3670194	320	244	sense-overlapping	XM_020845071.2	NW_021318796.1:3658796_3675952_-	1432	110112758	LOC110112758	E3 ubiquitin-protein ligase RNF25	-	-	-	-
circRNA_0761|NW_021318800.1:34907_35200_+	NW_021318800.1	+	34907	35200	294	225	sense-overlapping	XM_020828427.2	NW_021318800.1:9408_40144_+	3705	110100768	LOC110100768	guanylate-binding protein 2-like	-	-	-	-
circRNA_0762|NW_021318800.1:71260_72355_+	NW_021318800.1	+	71260	72355	1096	363	sense-overlapping	XM_020828391.2	NW_021318800.1:63761_75626_+	1992	110100741	LOC110100741	cytosolic isocitrate dehydrogenase [NADP]	GO:0048046,GO:0009570,GO:0005829,GO:0005739,GO:0005634,GO:0005886,GO:0009506,GO:0005507,GO:0004450,GO:0000287,GO:0051287,GO:0042742,GO:0006102,GO:0006739,GO:0046686,GO:0010043,GO:0006099	apoplast|chloroplast stroma|cytosol|mitochondrion|nucleus|plasma membrane|plasmodesma|copper ion binding|isocitrate dehydrogenase (NADP+) activity|magnesium ion binding|NAD binding|defense response to bacterium|isocitrate metabolic process|NADP metabolic process|response to cadmium ion|response to zinc ion|tricarboxylic acid cycle	path:dct00020,path:dct00480,path:dct01100,path:dct01110,path:dct01200,path:dct01210,path:dct01230,path:dct04146	Citrate cycle (TCA cycle)|Glutathione metabolism|Metabolic pathways|Biosynthesis of secondary metabolites|Carbon metabolism|2-Oxocarboxylic acid metabolism|Biosynthesis of amino acids|Peroxisome
circRNA_0763|NW_021318800.1:150723_168815_-	NW_021318800.1	-	150723	168815	18093	994	sense-overlapping	XM_020828347.2	NW_021318800.1:142566_192818_-	4729	110100712	LOC110100712	uncharacterized LOC110100712	-	-	-	-
circRNA_0764|NW_021318800.1:159631_168815_-	NW_021318800.1	-	159631	168815	9185	438	sense-overlapping	XM_020828347.2	NW_021318800.1:142566_192818_-	4729	110100712	LOC110100712	uncharacterized LOC110100712	-	-	-	-
circRNA_0765|NW_021318800.1:257971_258378_+	NW_021318800.1	+	257971	258378	408	319	sense-overlapping	XM_020828267.2	NW_021318800.1:253682_269635_+	1096	110100663	LOC110100663	U1 small nuclear ribonucleoprotein C-1	GO:0000243,GO:0005685,GO:0071004,GO:0003729,GO:0030627,GO:0030619,GO:0008270,GO:0000395,GO:0000387	commitment complex|U1 snRNP|U2-type prespliceosome|mRNA binding|pre-mRNA 5'-splice site binding|U1 snRNA binding|zinc ion binding|mRNA 5'-splice site recognition|spliceosomal snRNP assembly	path:dct03040	Spliceosome
circRNA_0766|NW_021318800.1:334656_338710_-	NW_021318800.1	-	334656	338710	4055	214	sense-overlapping	XM_020828239.2	NW_021318800.1:326251_348588_-	1634	110100636	LOC110100636	RNA polymerase II C-terminal domain phosphatase-like 4, transcript variant X2	GO:0005634,GO:0046872,GO:0008022,GO:0003723,GO:0008420,GO:0070940,GO:0009651	nucleus|metal ion binding|protein C-terminus binding|RNA binding|RNA polymerase II CTD heptapeptide repeat phosphatase activity|dephosphorylation of RNA polymerase II C-terminal domain|response to salt stress	-	-
circRNA_0767|NW_021318800.1:334656_348629_-	NW_021318800.1	-	334656	348629	13974	394	sense-overlapping	XM_020828234.2	NW_021318800.1:326251_350151_-	2047	110100636	LOC110100636	RNA polymerase II C-terminal domain phosphatase-like 4, transcript variant X1	GO:0005634,GO:0046872,GO:0008022,GO:0003723,GO:0008420,GO:0070940,GO:0009651	nucleus|metal ion binding|protein C-terminus binding|RNA binding|RNA polymerase II CTD heptapeptide repeat phosphatase activity|dephosphorylation of RNA polymerase II C-terminal domain|response to salt stress	-	-
circRNA_0768|NW_021318800.1:358369_359376_-	NW_021318800.1	-	358369	359376	1008	504	sense-overlapping	XM_020828223.2	NW_021318800.1:353394_382038_-	3102	110100629	LOC110100629	protein transport protein SEC23-like	GO:0030127,GO:0070971,GO:0005789,GO:0000139,GO:0005096,GO:0008270,GO:0090110,GO:0006886	COPII vesicle coat|endoplasmic reticulum exit site|endoplasmic reticulum membrane|Golgi membrane|GTPase activator activity|zinc ion binding|COPII-coated vesicle cargo loading|intracellular protein transport	path:dct04141	Protein processing in endoplasmic reticulum
circRNA_0769|NW_021318800.1:365567_366098_-	NW_021318800.1	-	365567	366098	532	331	sense-overlapping	XM_020828223.2	NW_021318800.1:353394_382038_-	3102	110100629	LOC110100629	protein transport protein SEC23-like	GO:0030127,GO:0070971,GO:0005789,GO:0000139,GO:0005096,GO:0008270,GO:0090110,GO:0006886	COPII vesicle coat|endoplasmic reticulum exit site|endoplasmic reticulum membrane|Golgi membrane|GTPase activator activity|zinc ion binding|COPII-coated vesicle cargo loading|intracellular protein transport	path:dct04141	Protein processing in endoplasmic reticulum
circRNA_0770|NW_021318805.1:6249_6922_-	NW_021318805.1	-	6249	6922	674	595	sense-overlapping	XM_028693716.1	NW_021318805.1:2926_11401_-	2038	110104767	LOC110104767	E3 ubiquitin-protein ligase RNF14, transcript variant X1	GO:0005737,GO:0000151,GO:0046872,GO:0031624,GO:0061630,GO:0032436,GO:0000209,GO:0006449,GO:0006511	cytoplasm|ubiquitin ligase complex|metal ion binding|ubiquitin conjugating enzyme binding|ubiquitin protein ligase activity|positive regulation of proteasomal ubiquitin-dependent protein catabolic process|protein polyubiquitination|regulation of translational termination|ubiquitin-dependent protein catabolic process	-	-
circRNA_0771|NW_021318805.1:156183_157999_+	NW_021318805.1	+	156183	157999	1817	660	sense-overlapping	XM_028693722.1	NW_021318805.1:140122_174301_+	2944	110104741	LOC110104741	transducin beta-like protein 3, transcript variant X4	GO:0005730,GO:0034388,GO:0032040,GO:0030515,GO:0030490,GO:0000462	nucleolus|Pwp2p-containing subcomplex of 90S preribosome|small-subunit processome|snoRNA binding|maturation of SSU-rRNA|maturation of SSU-rRNA from tricistronic rRNA transcript (SSU-rRNA, 5.8S rRNA, LSU-rRNA)	path:dct03008	Ribosome biogenesis in eukaryotes
circRNA_0772|NW_021318805.1:159474_163878_+	NW_021318805.1	+	159474	163878	4405	600	sense-overlapping	XM_028693722.1	NW_021318805.1:140122_174301_+	2944	110104741	LOC110104741	transducin beta-like protein 3, transcript variant X4	GO:0005730,GO:0034388,GO:0032040,GO:0030515,GO:0030490,GO:0000462	nucleolus|Pwp2p-containing subcomplex of 90S preribosome|small-subunit processome|snoRNA binding|maturation of SSU-rRNA|maturation of SSU-rRNA from tricistronic rRNA transcript (SSU-rRNA, 5.8S rRNA, LSU-rRNA)	path:dct03008	Ribosome biogenesis in eukaryotes
circRNA_0773|NW_021318810.1:84185_85218_-	NW_021318810.1	-	84185	85218	1034	634	sense-overlapping	XM_020841094.2	NW_021318810.1:71536_113821_-	2183	110109883	LOC110109883	MACPF domain-containing protein At4g24290-like	GO:0005886,GO:0006955,GO:0009626	plasma membrane|immune response|plant-type hypersensitive response	-	-
circRNA_0774|NW_021318810.1:214416_214624_+	NW_021318810.1	+	214416	214624	209	209	exonic	XM_028693729.1	NW_021318810.1:213287_257465_+	3821	110109912	LOC110109912	uncharacterized LOC110109912	-	-	-	-
circRNA_0775|NW_021318815.1:123309_134321_-	NW_021318815.1	-	123309	134321	11013	291	sense-overlapping	XM_020828037.2	NW_021318815.1:113651_144871_-	900	110100508	LOC110100508	DNA-directed RNA polymerase V subunit 5A	GO:0000419,GO:0003677,GO:0003899,GO:0006360,GO:0006366,GO:0006383	RNA polymerase V complex|DNA binding|DNA-directed 5'-3' RNA polymerase activity|transcription by RNA polymerase I|transcription by RNA polymerase II|transcription by RNA polymerase III	path:dct03020	RNA polymerase
circRNA_0776|NW_021318815.1:516996_517613_-	NW_021318815.1	-	516996	517613	618	201	sense-overlapping	XM_028693742.1	NW_021318815.1:515670_533322_-	1169	110100506	LOC110100506	EEF1A lysine methyltransferase 2, transcript variant X2	GO:0005737,GO:0005829,GO:0005634,GO:0016279,GO:0018027,GO:0018026,GO:2000765,GO:0016192	cytoplasm|cytosol|nucleus|protein-lysine N-methyltransferase activity|peptidyl-lysine dimethylation|peptidyl-lysine monomethylation|regulation of cytoplasmic translation|vesicle-mediated transport	-	-
circRNA_0777|NW_021318815.1:642987_643216_+	NW_021318815.1	+	642987	643216	230	144	sense-overlapping	XM_020828002.2	NW_021318815.1:642296_645291_+	1507	110100479	LOC110100479	protein DETOXIFICATION 10-like	GO:0016021,GO:0016020,GO:0005774,GO:0015297,GO:0022857,GO:0042910,GO:0042908	integral component of membrane|membrane|vacuolar membrane|antiporter activity|transmembrane transporter activity|xenobiotic transmembrane transporter activity|xenobiotic transport	-	-
circRNA_0778|NW_021318815.1:802283_809732_+	NW_021318815.1	+	802283	809732	7450	1008	sense-overlapping	XM_028693751.1	NW_021318815.1:779941_839077_+	3769	110103954	LOC110103954	calmodulin-binding transcription activator 4-like, transcript variant X2	GO:0005829,GO:0005634,GO:0005516,GO:0043565,GO:0045944,GO:0006355	cytosol|nucleus|calmodulin binding|sequence-specific DNA binding|positive regulation of transcription by RNA polymerase II|regulation of transcription, DNA-templated	-	-
circRNA_0779|NW_021318820.1:54521_54830_+	NW_021318820.1	+	54521	54830	310	219	sense-overlapping	XM_020847558.2	NW_021318820.1:52924_56145_+	1825	110114625	LOC110114625	transcription factor bHLH130-like	GO:0005634,GO:0003677,GO:0001228,GO:0003700,GO:0046983,GO:0048573,GO:0006355	nucleus|DNA binding|DNA-binding transcription activator activity, RNA polymerase II-specific|DNA-binding transcription factor activity|protein dimerization activity|photoperiodism, flowering|regulation of transcription, DNA-templated	-	-
circRNA_0780|NW_021318820.1:54521_55044_+	NW_021318820.1	+	54521	55044	524	288	sense-overlapping	XM_020847558.2	NW_021318820.1:52924_56145_+	1825	110114625	LOC110114625	transcription factor bHLH130-like	GO:0005634,GO:0003677,GO:0001228,GO:0003700,GO:0046983,GO:0048573,GO:0006355	nucleus|DNA binding|DNA-binding transcription activator activity, RNA polymerase II-specific|DNA-binding transcription factor activity|protein dimerization activity|photoperiodism, flowering|regulation of transcription, DNA-templated	-	-
circRNA_0781|NW_021318822.1:157077_157411_+	NW_021318822.1	+	157077	157411	335	142	sense-overlapping	XM_020837840.2	NW_021318822.1:114081_192924_+	2330	110107567	LOC110107567	cyclin-dependent kinase E-1	GO:0016592,GO:0005634,GO:0005524,GO:0004693,GO:0008353,GO:0006468	mediator complex|nucleus|ATP binding|cyclin-dependent protein serine/threonine kinase activity|RNA polymerase II CTD heptapeptide repeat kinase activity|protein phosphorylation	-	-
circRNA_0782|NW_021318822.1:820301_820600_-	NW_021318822.1	-	820301	820600	300	217	sense-overlapping	XM_020838859.2	NW_021318822.1:810835_820626_-	1039	110108284	LOC110108284	protein MAK16 homolog B	GO:0005829,GO:0005730,GO:0005634,GO:0030687,GO:0007049,GO:0042254	cytosol|nucleolus|nucleus|preribosome, large subunit precursor|cell cycle|ribosome biogenesis	-	-
circRNA_0783|NW_021318823.1:99701_100429_-	NW_021318823.1	-	99701	100429	729	542	sense-overlapping	XM_028693759.1	NW_021318823.1:99697_146105_-	1248	110110689	LOC110110689	CSC1-like protein At4g02900	GO:0016021,GO:0005886,GO:0005227	integral component of membrane|plasma membrane|calcium activated cation channel activity	-	-
circRNA_0784|NW_021318823.1:336898_337137_+	NW_021318823.1	+	336898	337137	240	240	exonic	XM_020842286.2	NW_021318823.1:322938_349615_+	1638	110110688	LOC110110688	serine incorporator 1	GO:0016021,GO:0005886,GO:0006658,GO:0030148	integral component of membrane|plasma membrane|phosphatidylserine metabolic process|sphingolipid biosynthetic process	-	-
circRNA_0785|NW_021318823.1:532158_532396_-	NW_021318823.1	-	532158	532396	239	156	sense-overlapping	XM_020842285.2	NW_021318823.1:519936_621640_-	1614	110110687	LOC110110687	E3 ubiquitin-protein ligase SP1	GO:0009707,GO:0016021,GO:0046872,GO:0004842,GO:0006996,GO:1904215	chloroplast outer membrane|integral component of membrane|metal ion binding|ubiquitin-protein transferase activity|organelle organization|regulation of protein import into chloroplast stroma	-	-
circRNA_0786|NW_021318823.1:590703_591012_-	NW_021318823.1	-	590703	591012	310	224	sense-overlapping	XM_020842285.2	NW_021318823.1:519936_621640_-	1614	110110687	LOC110110687	E3 ubiquitin-protein ligase SP1	GO:0009707,GO:0016021,GO:0046872,GO:0004842,GO:0006996,GO:1904215	chloroplast outer membrane|integral component of membrane|metal ion binding|ubiquitin-protein transferase activity|organelle organization|regulation of protein import into chloroplast stroma	-	-
circRNA_0787|NW_021318823.1:992866_993812_+	NW_021318823.1	+	992866	993812	947	566	sense-overlapping	XM_020844106.2	NW_021318823.1:992847_994034_+	651	110112033	LOC110112033	regulator of telomere elongation helicase 1 homolog	GO:0005739,GO:0005634,GO:0051539,GO:0005524,GO:0003677,GO:0003678,GO:0070182,GO:0046872,GO:0032508,GO:0036297,GO:0043007,GO:0070716,GO:0045910,GO:1904430,GO:0009555,GO:0000725,GO:0010569,GO:0048364,GO:0090657	mitochondrion|nucleus|4 iron, 4 sulfur cluster binding|ATP binding|DNA binding|DNA helicase activity|DNA polymerase binding|metal ion binding|DNA duplex unwinding|interstrand cross-link repair|maintenance of rDNA|mismatch repair involved in maintenance of fidelity involved in DNA-dependent DNA replication|negative regulation of DNA recombination|negative regulation of t-circle formation|pollen de…	-	-
circRNA_0788|NW_021318832.1:589458_589793_+	NW_021318832.1	+	589458	589793	336	259	sense-overlapping	XM_020840888.2	NW_021318832.1:573679_599504_+	1202	110109670	LOC110109670	14-3-3-like protein B	GO:0019904	protein domain specific binding	-	-
circRNA_0789|NW_021318832.1:860952_868465_-	NW_021318832.1	-	860952	868465	7514	514	sense-overlapping	XM_020841117.2	NW_021318832.1:858700_892691_-	1645	110109873	LOC110109873	mitogen-activated protein kinase 1	GO:0005938,GO:0005737,GO:0005634,GO:0009524,GO:0009574,GO:0005802,GO:0005524,GO:0004707,GO:0019902,GO:0009738,GO:0010120,GO:0051301,GO:0009864,GO:0010229,GO:0035556,GO:0010150,GO:0048481,GO:0009555,GO:0010183,GO:0080136,GO:0010468,GO:0009723,GO:0050826,GO:0009620,GO:0042542,GO:1902065,GO:0009651,GO:0010224,GO:0048364	cell cortex|cytoplasm|nucleus|phragmoplast|preprophase band|trans-Golgi network|ATP binding|MAP kinase activity|phosphatase binding|abscisic acid-activated signaling pathway|camalexin biosynthetic process|cell division|induced systemic resistance, jasmonic acid mediated signaling pathway|inflorescence development|intracellular signal transduction|leaf senescence|plant ovule development|pollen dev…	path:dct04016,path:dct04075,path:dct04626	MAPK signaling pathway - plant|Plant hormone signal transduction|Plant-pathogen interaction
circRNA_0790|NW_021318832.1:868133_889693_-	NW_021318832.1	-	868133	889693	21561	471	sense-overlapping	XM_020841117.2	NW_021318832.1:858700_892691_-	1645	110109873	LOC110109873	mitogen-activated protein kinase 1	GO:0005938,GO:0005737,GO:0005634,GO:0009524,GO:0009574,GO:0005802,GO:0005524,GO:0004707,GO:0019902,GO:0009738,GO:0010120,GO:0051301,GO:0009864,GO:0010229,GO:0035556,GO:0010150,GO:0048481,GO:0009555,GO:0010183,GO:0080136,GO:0010468,GO:0009723,GO:0050826,GO:0009620,GO:0042542,GO:1902065,GO:0009651,GO:0010224,GO:0048364	cell cortex|cytoplasm|nucleus|phragmoplast|preprophase band|trans-Golgi network|ATP binding|MAP kinase activity|phosphatase binding|abscisic acid-activated signaling pathway|camalexin biosynthetic process|cell division|induced systemic resistance, jasmonic acid mediated signaling pathway|inflorescence development|intracellular signal transduction|leaf senescence|plant ovule development|pollen dev…	path:dct04016,path:dct04075,path:dct04626	MAPK signaling pathway - plant|Plant hormone signal transduction|Plant-pathogen interaction
circRNA_0791|NW_021318832.1:1603199_1604253_+	NW_021318832.1	+	1603199	1604253	1055	311	sense-overlapping	XM_020837613.2	NW_021318832.1:1602643_1610063_+	796	110107370	LOC110107370	60S ribosomal protein L36-3	GO:0005829,GO:0022625,GO:0022626,GO:0005774,GO:0003735,GO:0002181	cytosol|cytosolic large ribosomal subunit|cytosolic ribosome|vacuolar membrane|structural constituent of ribosome|cytoplasmic translation	path:dct03010	Ribosome
circRNA_0792|NW_021318832.1:1734051_1734682_-	NW_021318832.1	-	1734051	1734682	632	251	sense-overlapping	XM_020850058.2	NW_021318832.1:1713378_1740432_-	3292	110116488	LOC110116488	GBF-interacting protein 1-like, transcript variant X1	GO:0005634,GO:0042802,GO:0051082,GO:0043388	nucleus|identical protein binding|unfolded protein binding|positive regulation of DNA binding	-	-
circRNA_0793|NW_021318832.1:2447725_2449390_+	NW_021318832.1	+	2447725	2449390	1666	616	sense-overlapping	XM_028693804.1	NW_021318832.1:2438420_2471255_+	2349	110109538	LOC110109538	casein kinase 1-like protein 2	GO:0005737,GO:0005634,GO:0005886,GO:0005524,GO:0004674,GO:0018105	cytoplasm|nucleus|plasma membrane|ATP binding|protein serine/threonine kinase activity|peptidyl-serine phosphorylation	-	-
circRNA_0794|NW_021318832.1:2488783_2489055_-	NW_021318832.1	-	2488783	2489055	273	273	exonic	XM_020846536.2	NW_021318832.1:2487182_2489405_-	1830	110113834	LOC110113834	protein IQ-DOMAIN 1, transcript variant X1	GO:0005737,GO:0005874,GO:0005634,GO:0005516,GO:0008017	cytoplasm|microtubule|nucleus|calmodulin binding|microtubule binding	-	-
circRNA_0795|NW_021318832.1:2662336_2662676_-	NW_021318832.1	-	2662336	2662676	341	261	sense-overlapping	XM_020846543.2	NW_021318832.1:2649789_2669249_-	3859	110113839	LOC110113839	receptor-like serine/threonine-protein kinase ALE2, transcript variant X3	-	-	-	-
circRNA_0796|NW_021318832.1:2794847_2795953_-	NW_021318832.1	-	2794847	2795953	1107	497	sense-overlapping	XM_020834743.2	NW_021318832.1:2772086_2798439_-	1904	110105299	LOC110105299	DEAD-box ATP-dependent RNA helicase 20, transcript variant X2	GO:0005737,GO:0005634,GO:1990904,GO:0005524,GO:0003723,GO:0003724,GO:0000184,GO:0006364	cytoplasm|nucleus|ribonucleoprotein complex|ATP binding|RNA binding|RNA helicase activity|nuclear-transcribed mRNA catabolic process, nonsense-mediated decay|rRNA processing	path:dct03040	Spliceosome
circRNA_0797|NW_021318832.1:2955154_2955492_-	NW_021318832.1	-	2955154	2955492	339	246	sense-overlapping	XM_020834643.2	NW_021318832.1:2942151_2983696_-	2146	110105239	LOC110105239	serine/threonine-protein kinase tricorner, transcript variant X1	GO:0005524,GO:0004674	ATP binding|protein serine/threonine kinase activity	-	-
circRNA_0798|NW_021318832.1:3153243_3179229_-	NW_021318832.1	-	3153243	3179229	25987	25987	sense-overlapping	XM_020834584.2	NW_021318832.1:3132923_3180314_-	6527	110105190	LOC110105190	DExH-box ATP-dependent RNA helicase DExH12-like	-	-	path:dct03040	Spliceosome
circRNA_0799|NW_021318832.1:3154053_3180066_-	NW_021318832.1	-	3154053	3180066	26014	25898	sense-overlapping	XM_020834584.2	NW_021318832.1:3132923_3180314_-	6527	110105190	LOC110105190	DExH-box ATP-dependent RNA helicase DExH12-like	-	-	path:dct03040	Spliceosome
circRNA_0800|NW_021318832.1:3815571_3815940_+	NW_021318832.1	+	3815571	3815940	370	288	sense-overlapping	XM_020818978.2	NW_021318832.1:3803684_3820468_+	3402	110093921	LOC110093921	eukaryotic translation initiation factor 3 subunit A-like	GO:0016282,GO:0033290,GO:0071540,GO:0071541,GO:0043614,GO:0003729,GO:0003743,GO:0001732,GO:0002188	eukaryotic 43S preinitiation complex|eukaryotic 48S preinitiation complex|eukaryotic translation initiation factor 3 complex, eIF3e|eukaryotic translation initiation factor 3 complex, eIF3m|multi-eIF complex|mRNA binding|translation initiation factor activity|formation of cytoplasmic translation initiation complex|translation reinitiation	path:dct03013	RNA transport
circRNA_0801|NW_021318832.1:3865340_3865486_-	NW_021318832.1	-	3865340	3865486	147	147	exonic	XM_020818980.2	NW_021318832.1:3864641_3875065_-	1760	110093922	LOC110093922	polyadenylate-binding protein RBP45, transcript variant X2	GO:0005634,GO:0008143,GO:0006397	nucleus|poly(A) binding|mRNA processing	-	-
circRNA_0802|NW_021318832.1:4072146_4074862_-	NW_021318832.1	-	4072146	4074862	2717	504	sense-overlapping	XM_020818960.2	NW_021318832.1:4065604_4096207_-	1599	110093911	LOC110093911	FHA domain-containing protein DDL, transcript variant X8	GO:0005829,GO:0005634,GO:0003729,GO:0003723,GO:0051301,GO:0035196,GO:0048638	cytosol|nucleus|mRNA binding|RNA binding|cell division|production of miRNAs involved in gene silencing by miRNA|regulation of developmental growth	-	-
circRNA_0803|NW_021318832.1:4152926_4172016_+	NW_021318832.1	+	4152926	4172016	19091	1572	sense-overlapping	XM_020818986.2	NW_021318832.1:4139912_4172506_+	3790	110093928	LOC110093928	polyadenylation and cleavage factor homolog 4, transcript variant X1	GO:0005737,GO:0005849,GO:0005634,GO:0046872,GO:0003729,GO:0000993,GO:0009908,GO:0006378,GO:0006397,GO:0009911,GO:0006369	cytoplasm|mRNA cleavage factor complex|nucleus|metal ion binding|mRNA binding|RNA polymerase II complex binding|flower development|mRNA polyadenylation|mRNA processing|positive regulation of flower development|termination of RNA polymerase II transcription	path:dct03015	mRNA surveillance pathway
circRNA_0804|NW_021318832.1:4351236_4351665_+	NW_021318832.1	+	4351236	4351665	430	246	sense-overlapping	XM_020818971.2	NW_021318832.1:4338202_4358406_+	2057	110093918	LOC110093918	RNA-binding protein 39	GO:0005634,GO:1990904,GO:0005681,GO:0003729,GO:0003723,GO:1990446,GO:0045292,GO:0006397	nucleus|ribonucleoprotein complex|spliceosomal complex|mRNA binding|RNA binding|U1 snRNP binding|mRNA cis splicing, via spliceosome|mRNA processing	-	-
circRNA_0805|NW_021318832.1:4352298_4352490_+	NW_021318832.1	+	4352298	4352490	193	193	exonic	XM_020818971.2	NW_021318832.1:4338202_4358406_+	2057	110093918	LOC110093918	RNA-binding protein 39	GO:0005634,GO:1990904,GO:0005681,GO:0003729,GO:0003723,GO:1990446,GO:0045292,GO:0006397	nucleus|ribonucleoprotein complex|spliceosomal complex|mRNA binding|RNA binding|U1 snRNP binding|mRNA cis splicing, via spliceosome|mRNA processing	-	-
circRNA_0806|NW_021318832.1:4588182_4588518_-	NW_021318832.1	-	4588182	4588518	337	236	sense-overlapping	XM_020846575.2	NW_021318832.1:4586312_4614656_-	1533	110113866	LOC110113866	uncharacterized LOC110113866, transcript variant X2	-	-	-	-
circRNA_0807|NW_021318832.1:4601373_4601727_-	NW_021318832.1	-	4601373	4601727	355	355	sense-overlapping	XM_020846575.2	NW_021318832.1:4586312_4614656_-	1533	110113866	LOC110113866	uncharacterized LOC110113866, transcript variant X2	-	-	-	-
circRNA_0808|NW_021318832.1:4629452_4638181_-	NW_021318832.1	-	4629452	4638181	8730	133	sense-overlapping	XM_028693835.1	NW_021318832.1:4628786_4678217_-	2107	110113861	LOC110113861	vacuolar protein sorting-associated protein 52 A, transcript variant X2	GO:0005829,GO:0012505,GO:0010008,GO:0000938,GO:0005794,GO:0000139,GO:0017137,GO:0019905,GO:0032456,GO:0006896,GO:0009860,GO:0015031,GO:0042147,GO:0019953	cytosol|endomembrane system|endosome membrane|GARP complex|Golgi apparatus|Golgi membrane|Rab GTPase binding|syntaxin binding|endocytic recycling|Golgi to vacuole transport|pollen tube growth|protein transport|retrograde transport, endosome to Golgi|sexual reproduction	-	-
circRNA_0809|NW_021318832.1:4658658_4658917_-	NW_021318832.1	-	4658658	4658917	260	175	sense-overlapping	XM_028693835.1	NW_021318832.1:4628786_4678217_-	2107	110113861	LOC110113861	vacuolar protein sorting-associated protein 52 A, transcript variant X2	GO:0005829,GO:0012505,GO:0010008,GO:0000938,GO:0005794,GO:0000139,GO:0017137,GO:0019905,GO:0032456,GO:0006896,GO:0009860,GO:0015031,GO:0042147,GO:0019953	cytosol|endomembrane system|endosome membrane|GARP complex|Golgi apparatus|Golgi membrane|Rab GTPase binding|syntaxin binding|endocytic recycling|Golgi to vacuole transport|pollen tube growth|protein transport|retrograde transport, endosome to Golgi|sexual reproduction	-	-
circRNA_0810|NW_021318832.1:4662696_4678217_-	NW_021318832.1	-	4662696	4678217	15522	743	sense-overlapping	XM_028693835.1	NW_021318832.1:4628786_4678217_-	2107	110113861	LOC110113861	vacuolar protein sorting-associated protein 52 A, transcript variant X2	GO:0005829,GO:0012505,GO:0010008,GO:0000938,GO:0005794,GO:0000139,GO:0017137,GO:0019905,GO:0032456,GO:0006896,GO:0009860,GO:0015031,GO:0042147,GO:0019953	cytosol|endomembrane system|endosome membrane|GARP complex|Golgi apparatus|Golgi membrane|Rab GTPase binding|syntaxin binding|endocytic recycling|Golgi to vacuole transport|pollen tube growth|protein transport|retrograde transport, endosome to Golgi|sexual reproduction	-	-
circRNA_0811|NW_021318832.1:4666197_4678217_-	NW_021318832.1	-	4666197	4678217	12021	386	sense-overlapping	XM_028693835.1	NW_021318832.1:4628786_4678217_-	2107	110113861	LOC110113861	vacuolar protein sorting-associated protein 52 A, transcript variant X2	GO:0005829,GO:0012505,GO:0010008,GO:0000938,GO:0005794,GO:0000139,GO:0017137,GO:0019905,GO:0032456,GO:0006896,GO:0009860,GO:0015031,GO:0042147,GO:0019953	cytosol|endomembrane system|endosome membrane|GARP complex|Golgi apparatus|Golgi membrane|Rab GTPase binding|syntaxin binding|endocytic recycling|Golgi to vacuole transport|pollen tube growth|protein transport|retrograde transport, endosome to Golgi|sexual reproduction	-	-
circRNA_0812|NW_021318832.1:4678116_4681946_-	NW_021318832.1	-	4678116	4681946	3831	198	sense-overlapping	XM_020846568.2	NW_021318832.1:4628786_4698827_-	2591	110113861	LOC110113861	vacuolar protein sorting-associated protein 52 A, transcript variant X1	GO:0005829,GO:0012505,GO:0010008,GO:0000938,GO:0005794,GO:0000139,GO:0017137,GO:0019905,GO:0032456,GO:0006896,GO:0009860,GO:0015031,GO:0042147,GO:0019953	cytosol|endomembrane system|endosome membrane|GARP complex|Golgi apparatus|Golgi membrane|Rab GTPase binding|syntaxin binding|endocytic recycling|Golgi to vacuole transport|pollen tube growth|protein transport|retrograde transport, endosome to Golgi|sexual reproduction	-	-
circRNA_0813|NW_021318832.1:4912714_4914535_+	NW_021318832.1	+	4912714	4914535	1822	372	sense-overlapping	XM_020821000.1	NW_021318832.1:4901409_4939211_+	1952	110095456	LOC110095456	D-lactate dehydrogenase [cytochrome], mitochondrial, transcript variant X1	GO:0005739,GO:0005886,GO:0005524,GO:0004458,GO:0008720,GO:0071949,GO:0050660,GO:0019154,GO:0008891,GO:0042802,GO:1903457,GO:0051596	mitochondrion|plasma membrane|ATP binding|D-lactate dehydrogenase (cytochrome) activity|D-lactate dehydrogenase activity|FAD binding|flavin adenine dinucleotide binding|glycolate dehydrogenase activity|glycolate oxidase activity|identical protein binding|lactate catabolic process|methylglyoxal catabolic process	path:dct00620,path:dct01100	Pyruvate metabolism|Metabolic pathways
circRNA_0814|NW_021318832.1:4912714_4926126_+	NW_021318832.1	+	4912714	4926126	13413	447	sense-overlapping	XM_020821000.1	NW_021318832.1:4901409_4939211_+	1952	110095456	LOC110095456	D-lactate dehydrogenase [cytochrome], mitochondrial, transcript variant X1	GO:0005739,GO:0005886,GO:0005524,GO:0004458,GO:0008720,GO:0071949,GO:0050660,GO:0019154,GO:0008891,GO:0042802,GO:1903457,GO:0051596	mitochondrion|plasma membrane|ATP binding|D-lactate dehydrogenase (cytochrome) activity|D-lactate dehydrogenase activity|FAD binding|flavin adenine dinucleotide binding|glycolate dehydrogenase activity|glycolate oxidase activity|identical protein binding|lactate catabolic process|methylglyoxal catabolic process	path:dct00620,path:dct01100	Pyruvate metabolism|Metabolic pathways
circRNA_0815|NW_021318832.1:5135522_5139306_-	NW_021318832.1	-	5135522	5139306	3785	933	sense-overlapping	XM_020821027.2	NW_021318832.1:5135359_5150311_-	1887	110095476	LOC110095476	protochlorophyllide-dependent translocon component 52, chloroplastic	GO:0009941,GO:0009706,GO:0005829,GO:0016021,GO:0009536,GO:0051537,GO:0010277,GO:0046872,GO:0015031	chloroplast envelope|chloroplast inner membrane|cytosol|integral component of membrane|plastid|2 iron, 2 sulfur cluster binding|chlorophyllide a oxygenase [overall] activity|metal ion binding|protein transport	-	-
circRNA_0816|NW_021318832.1:5138589_5139306_-	NW_021318832.1	-	5138589	5139306	718	451	sense-overlapping	XM_020821027.2	NW_021318832.1:5135359_5150311_-	1887	110095476	LOC110095476	protochlorophyllide-dependent translocon component 52, chloroplastic	GO:0009941,GO:0009706,GO:0005829,GO:0016021,GO:0009536,GO:0051537,GO:0010277,GO:0046872,GO:0015031	chloroplast envelope|chloroplast inner membrane|cytosol|integral component of membrane|plastid|2 iron, 2 sulfur cluster binding|chlorophyllide a oxygenase [overall] activity|metal ion binding|protein transport	-	-
circRNA_0817|NW_021318832.1:5505288_5506674_+	NW_021318832.1	+	5505288	5506674	1387	432	sense-overlapping	XM_020821007.2	NW_021318832.1:5491697_5521058_+	2367	110095461	LOC110095461	splicing factor U2AF-associated protein 2, transcript variant X1	GO:0005686,GO:0005684,GO:0003723,GO:0045292	U2 snRNP|U2-type spliceosomal complex|RNA binding|mRNA cis splicing, via spliceosome	-	-
circRNA_0818|NW_021318832.1:5543990_5549307_-	NW_021318832.1	-	5543990	5549307	5318	307	sense-overlapping	XM_020821003.2	NW_021318832.1:5526554_5619713_-	3843	110095458	LOC110095458	tRNA ligase 1	GO:0005737,GO:0005634,GO:0005524,GO:0004519,GO:0016301,GO:0046872,GO:0003729,GO:0003972,GO:0009734,GO:0010928,GO:0042245,GO:0006412,GO:0006388,GO:0010069	cytoplasm|nucleus|ATP binding|endonuclease activity|kinase activity|metal ion binding|mRNA binding|RNA ligase (ATP) activity|auxin-activated signaling pathway|regulation of auxin mediated signaling pathway|RNA repair|translation|tRNA splicing, via endonucleolytic cleavage and ligation|zygote asymmetric cytokinesis in embryo sac	-	-
circRNA_0819|NW_021318832.1:5543990_5564717_-	NW_021318832.1	-	5543990	5564717	20728	466	sense-overlapping	XM_020821003.2	NW_021318832.1:5526554_5619713_-	3843	110095458	LOC110095458	tRNA ligase 1	GO:0005737,GO:0005634,GO:0005524,GO:0004519,GO:0016301,GO:0046872,GO:0003729,GO:0003972,GO:0009734,GO:0010928,GO:0042245,GO:0006412,GO:0006388,GO:0010069	cytoplasm|nucleus|ATP binding|endonuclease activity|kinase activity|metal ion binding|mRNA binding|RNA ligase (ATP) activity|auxin-activated signaling pathway|regulation of auxin mediated signaling pathway|RNA repair|translation|tRNA splicing, via endonucleolytic cleavage and ligation|zygote asymmetric cytokinesis in embryo sac	-	-
[truncated: 2,918 more rows]
