# Supplementary material for: Whole-Transcriptome Sequencing Reveals the Global Molecular Responses and NAC Transcription Factors Involved in Drought Stress in Dendrobium catenatum
Source: Antioxidants (Basel). 2024 Jan 12;13(1):94. doi: 10.3390/antiox13010094 (PMC10812421; doi:10.3390/antiox13010094)
Supplement: Supplementary file 1 [file antioxidants-13-00094-s001.zip › Table S6-small RNA list.xlsx]

## Sheet: Sheet1
id	baseMean	baseMean_control_leaf_ck	baseMean_case_leaf_drought	foldChange	log2FoldChange	pval	padj	up_down	tpm_leaf_ck1	tpm_leaf_ck2	tpm_leaf_ck3	tpm_leaf_drought1	tpm_leaf_drought2	tpm_leaf_drought3	sequence
aau-miR172|vvi-miR172d	2401.85	4066.83	736.871	0.18119	-2.46442	0	0	Down	8055.1	7950.67	7695.04	1205.94	1120.61	1187.39	UGAGAAUCUUGAUGAUGCUGCAU
aau-miR319|aly-miR319a-3p|aly-miR319b-3p|amg-miR319|aof-miR319a|aqc-miR319|ath-miR319a|ath-miR319b|bra-miR319-3p|cca-miR319|gma-miR319h|gma-miR319j|gma-miR319k|gma-miR319m|hbr-miR319|lus-miR319a|mdm-miR319a|mdm-miR319b-3p|mes-miR319a|mes-miR319b|mes-miR319c|mes-miR319d|mes-miR319e|mtr-miR319d-3p|nta-miR319a|nta-miR319b|rco-miR319a|rco-miR319b|rco-miR319c|sly-miR319b|stu-miR319a-3p|tae-miR319|vun-…	21519.7	102.271	42937.1	419.839	8.71369	0	0	Up	239.759	189.213	224.278	74909	74601.7	74799	UUGGACUGAAGGGAGCUCCCU
aau-miR396|aly-miR396a-5p|amg-miR396|aof-miR396b|aqc-miR396a|ata-miR396e-5p|ath-miR396a-5p|bcy-miR396a|bdi-miR396d-5p|bdi-miR396c-5p|bgy-miR396a|cas-miR396a|cme-miR396b|cpa-miR396|csi-miR396a-5p|csi-miR396b-5p|dpr-miR396|eun-miR396b-5p|fve-miR396a-5p|fve-miR396c-5p|fve-miR396d|ghr-miR396a|ghr-miR396b|gma-miR396a-5p|gma-miR396i-5p|hbr-miR396b|lja-miR396|lus-miR396a|lus-miR396c|mdm-miR396b|mes-miR3…	55695.2	80497	30893.4	0.383783	-1.38164	0	0	Down	171244	171740	170920	53574.3	54575.4	53255.3	UUCCACAGCUUUCUUGAACUG
ahy-miR156b-5p|aly-miR157a-5p|aly-miR157b-5p|aly-miR157c-5p|aof-miR156b|ath-miR157a-5p|ath-miR157b-5p|ath-miR157c-5p|atr-miR156a|atr-miR156c|bna-miR156b|bna-miR156c|bna-miR156g|bol-miR157a|bra-miR157a|cca-miR156c|cme-miR156b|cpa-miR156e|cpa-miR156f|fve-miR156f|fve-miR156g-5p|gma-miR156d|gma-miR156c|gma-miR156i|gma-miR156j|gma-miR156l|gma-miR156m|gra-miR157a|gra-miR157b|han-miR156c|lus-miR156b|lus…	198.051	9.14878	386.953	42.2956	5.40243	1.74461e-177	2.07939e-176	Up	15.54	18.3109	24.6911	664.826	683.539	673.345	UUGACAGAAGAUAGAGAGCAC
ahy-miR160-5p|aof-miR160a|bdi-miR160e-5p|cme-miR160d|cpa-miR160d|mes-miR160f|mtr-miR160c|osa-miR160f-5p|ptc-miR160e-5p|ptc-miR160f|rco-miR160c|sbi-miR160f|tcc-miR160a|vca-miR160-5p	1.99279	0	3.98559	Inf	Inf	0.00962042	0.023311	Up	0	0	0	12.4101	5.05078	3.30071	UGCCUGGCUCCCUGAAUGCCA
aly-miR156a-5p|aly-miR156b-5p|aly-miR156c-5p|aly-miR156d-5p|aly-miR156e-5p|aly-miR156f-5p|aof-miR156a|ata-miR156d-5p|ata-miR156c-5p|ata-miR156a-5p|ata-miR156b-5p|ata-miR156e-5p|ath-miR156a-5p|ath-miR156b-5p|ath-miR156c-5p|ath-miR156d-5p|ath-miR156e|ath-miR156f-5p|atr-miR156b|atr-miR156d|bdi-miR156b-5p|bdi-miR156c|bdi-miR156d-5p|bdi-miR156e-5p|bdi-miR156f-5p|bdi-miR156g-5p|bdi-miR156h-5p|bdi-miR15…	678.688	49.0604	1308.32	26.6675	4.73701	0	0	Up	109.557	119.632	99.3817	2321.31	2374.12	2481.47	UGACAGAAGAGAGUGAGCAC
aly-miR156f-3p|bra-miR156b-3p|bra-miR156d-3p|csi-miR156c-3p	2.10408	0	4.20815	Inf	Inf	0.00638132	0.0157216	Up	0	0	0	5.31861	11.7851	4.95106	GCUCACUCUCUAUCUGUCACC
aly-miR156g-5p|ath-miR156g|smo-miR156a	12.4408	0.322509	24.5591	76.1501	6.25077	3.43077e-13	1.4833e-12	Up	0	2.13628	0	55.8454	35.3555	43.3218	CGACAGAAGAGAGUGAGCAC
aly-miR157c-3p|ath-miR157c-3p|cas-miR157b|cas-miR157c	6.94246	0.645018	13.2399	20.5264	4.35941	2.23906e-06	7.48049e-06	Up	0	4.0691	0	15.9558	21.8867	31.3567	GCUCUCUAUACUUCUGUCACC
aly-miR157d-5p|aqc-miR156b|aqc-miR156a|ath-miR157d|cme-miR156f|fve-miR156i|mdm-miR156x|mdm-miR156y|mdm-miR156z|mdm-miR156aa|nta-miR156g|nta-miR156h|nta-miR156i|nta-miR156j|pab-miR156z|ppe-miR156f	185.623	8.14478	363.101	44.5808	5.47835	4.38755e-168	4.60693e-167	Up	11.655	23.4991	19.4442	670.144	685.896	635.964	UGACAGAAGAUAGAGAGCAC
aly-miR159c-3p|ath-miR159c|cas-miR159a	290.984	79.181	502.787	6.34985	2.66672	6.15212e-74	4.7598e-73	Up	162.06	160.729	183.126	955.576	821.593	848.282	UUUGGAUUGAAGGGAGCUCCU
aly-miR160a-5p|aly-miR160b-5p|aly-miR160c-5p|aof-miR160c|aqc-miR160b|ata-miR160b-5p|ata-miR160a-5p|ata-miR160c-5p|ath-miR160a-5p|ath-miR160b|ath-miR160c-5p|atr-miR160|bdi-miR160a-5p|bdi-miR160b-5p|bdi-miR160c-5p|bdi-miR160d-5p|bna-miR160a|bna-miR160b|bna-miR160c|bna-miR160d|bra-miR160a-5p|cca-miR160b|cme-miR160a|cme-miR160b|cme-miR160c|cpa-miR160a|cpa-miR160b|cpa-miR160c-5p|cpa-miR160e|cpa-miR160…	790.727	525.148	1056.31	2.01144	1.00823	5.79269e-55	3.8128e-54	Up	1127.76	1155.62	1067.89	1852.65	1867.11	1798.89	UGCCUGGCUCCCUGUAUGCCA
aly-miR167a-5p|aly-miR167b-5p|aof-miR167a|ata-miR167c-5p|ata-miR167a-5p|ata-miR167e-5p|ath-miR167a-5p|ath-miR167b|bdi-miR167a|bdi-miR167b|bdi-miR167f|bna-miR167c|bra-miR167a|bra-miR167b|bra-miR167c|bra-miR167d|cme-miR167a|cme-miR167b|cpa-miR167a|cpa-miR167b|csi-miR167d-5p|csi-miR167e-5p|dpr-miR167a|dpr-miR167b|ghr-miR167a|ghr-miR167b|gma-miR167a|gma-miR167b|gma-miR167d|lus-miR167c|lus-miR167d|lus…	451.176	241.404	660.947	2.73793	1.45308	7.58878e-66	5.57776e-65	Up	550.559	496.43	493.822	1113.36	1149.89	1189.91	UGAAGCUGCCAGCAUGAUCUA
aly-miR167d-5p|ath-miR167d|cca-miR167|eun-miR167b-5p|nta-miR167a|nta-miR167b|nta-miR167c|pab-miR167b|rco-miR167c	249.316	409.861	88.7713	0.216589	-2.20697	1.56752e-77	1.25687e-76	Down	809.491	798.191	891.686	160.767	159.1	122.876	UGAAGCUGCCAGCAUGAUCUGG
aly-miR168a-3p|ath-miR168a-3p|bra-miR168b-3p|bra-miR168c-3p|cas-miR168|csi-miR168-3p|fve-miR168-3p|mtr-miR168c-3p|ptc-miR168a-3p|ptc-miR168b-3p|sly-miR168b-3p	79.8502	7.87094	151.829	19.2899	4.26977	5.16771e-61	3.45297e-60	Up	15.54	14.2418	20.5759	271.249	281.16	240.952	CCCGCCUUGCAUCAACUGAAU
aly-miR169a-5p|ata-miR169g-5p|ata-miR169e-5p|ata-miR169f-5p|ath-miR169a-5p|bdi-miR169a-5p|bna-miR169a|bna-miR169b|cas-miR169a|gma-miR169b|lus-miR169g|lus-miR169l|mes-miR169g|mtr-miR169a|nta-miR169a|nta-miR169b|nta-miR169c|nta-miR169d|nta-miR169e|nta-miR169f|nta-miR169g|nta-miR169h|nta-miR169i|nta-miR169j|nta-miR169k|nta-miR169l|nta-miR169m|nta-miR169o|nta-miR169p|osa-miR169a|ptc-miR169a|ptc-miR16…	319.087	589.181	48.994	0.0831561	-3.58803	1.28584e-172	1.38306e-171	Down	1274.28	1302.11	1183.12	74.4605	84.1797	97.3709	CAGCCAAGGAUGACUUGCCGA
aly-miR169b-5p|aly-miR169c-5p|aqc-miR169c|ata-miR169d-5p|ath-miR169b-5p|ath-miR169c|bdi-miR169c-5p|bdi-miR169f|bna-miR169n|cas-miR169b|cme-miR169h|cme-miR169f|csi-miR169g-5p|csi-miR169k-5p|csi-miR169m-5p|csi-miR169n-5p|csi-miR169o-5p|csi-miR169r-5p|gma-miR169a|gma-miR169f|gma-miR169g|gma-miR169m|lus-miR169f|lus-miR169h|lus-miR169j|mdm-miR169a|mdm-miR169g|mdm-miR169h|mdm-miR169i|mdm-miR169j|mes-mi…	63.0336	9.93679	116.13	11.6869	3.54682	3.61813e-40	2.15621e-39	Up	26.6399	14.2418	22.6335	218.063	202.031	186.49	CAGCCAAGGAUGACUUGCCGG
aly-miR169h-5p|aly-miR169i-5p|aly-miR169j-5p|aly-miR169k-5p|aly-miR169l-5p|aly-miR169m-5p|aqc-miR169b|ata-miR169i-5p|ath-miR169h|ath-miR169i|ath-miR169j|ath-miR169k|ath-miR169l|ath-miR169m|ath-miR169n|bdi-miR169g|bdi-miR169e-5p|cas-miR169c|cas-miR169e-5p|cas-miR169g-5p|cme-miR169n|cme-miR169e|ghb-miR169a|ghr-miR169a|lus-miR169b|lus-miR169c|lus-miR169k|mdm-miR169k|mdm-miR169l|mdm-miR169m|mdm-miR16…	11.3286	6.9095	15.7477	2.27913	1.18849	0.0266684	0.0615746	Up	15.54	10.1728	18.5183	35.4574	28.6211	18.1539	UAGCCAAGGAUGACUUGCCUG
aly-miR171a-3p|ath-miR171a-3p|atr-miR171a|atr-miR171c|bdi-miR171a|bna-miR171f|bra-miR171e|ccl-miR171|cme-miR171e|cme-miR171a|cme-miR171g|mdm-miR171c|mdm-miR171d|mdm-miR171e|osa-miR171a|sbi-miR171g|sbi-miR171j|tcc-miR171a|vvi-miR171e|zma-miR171n-3p	7.28309	0.63283	13.9333	22.0175	4.46058	1.02588e-06	3.5623e-06	Up	0	0	4.11518	19.5016	28.6211	24.7553	UGAUUGAGCCGCGCCAAUAUC
aly-miR171b-3p|aly-miR171c-3p|ata-miR171c-3p|ath-miR171b-3p|ath-miR171c-3p|bna-miR171a|bna-miR171b|bna-miR171c|bna-miR171d|bna-miR171e|bol-miR171a|bra-miR171a|bra-miR171b|bra-miR171c|bra-miR171d|cas-miR171b|cas-miR171c-3p|cme-miR171d|cme-miR171b|gma-miR171i-3p|lus-miR171i|mdm-miR171f-3p|mes-miR171b|mes-miR171c|mtr-miR171f|ptc-miR171a-3p|ptc-miR171b|rco-miR171a|rco-miR171b|sly-miR171b-3p|ssl-miR17…	5.56103	9.11531	2.00676	0.220153	-2.18342	0.00686896	0.016829	Down	13.32	18.3109	26.7487	7.09148	3.36719	0	UUGAGCCGUGCCAAUAUCACG
aly-miR172a-3p|aly-miR172b-3p|aof-miR172|aqc-miR172a|ata-miR172b-3p|ath-miR172a|ath-miR172b-3p|bdi-miR172a-3p|bna-miR172a|bol-miR172a|bol-miR172b|bra-miR172a|bra-miR172b-3p|cas-miR172a-3p|cas-miR172b|cca-miR172|cme-miR172b|cme-miR172c|csi-miR172b-3p|dpr-miR172a|dpr-miR172b|egu-miR172a|egu-miR172b|egu-miR172c|eun-miR172a-3p|eun-miR172b-3p|eun-miR172c-3p|fve-miR172b|fve-miR172c|fve-miR172a|gma-miR1…	4438.06	7455.61	1420.51	0.190529	-2.39192	6.29838e-295	9.57789e-294	Down	15921.8	16270.3	15392.9	2480.24	2513.61	2427.67	AGAAUCUUGAUGAUGCUGCAU
aly-miR172e-3p	86.2586	158.143	14.3741	0.0908929	-3.45969	5.49597e-53	3.5643e-52	Down	344.987	348.213	367.28	29.7842	26.5166	22.5273	GAAUCUUGAUGAUGCUGCAU
aly-miR319c-3p|aly-miR319d-3p|ath-miR319c|mes-miR319g|pvu-miR319c|rco-miR319d|sly-miR319c-3p	22.6173	1.36608	43.8684	32.1126	5.00507	6.98129e-21	3.38324e-20	Up	6.65998	0	2.05759	70.9148	77.4453	80.8674	UUGGACUGAAGGGAGCUCCUU
aly-miR393a-5p|aly-miR393b-5p|ath-miR393a-5p|ath-miR393b-5p|atr-miR393|cas-miR393-5p|cpa-miR393|gma-miR393c-5p|gma-miR393d|gma-miR393e|gma-miR393f|gma-miR393g|htu-miR393a|htu-miR393b|htu-miR393c|mes-miR393b|stu-miR393-5p|tcc-miR393a|zma-miR393b-5p	20.2859	34.7058	5.86598	0.16902	-2.56473	2.18655e-09	8.68709e-09	Down	82.6443	56.32	72.6704	10.1537	9.6424	9.45203	UCCAAAGGGAUCGCAUUGAUCC
aly-miR395d-3p|aly-miR395e-3p|aly-miR395g-3p|ath-miR395a|ath-miR395d|ath-miR395e|atr-miR395|bna-miR395a|bna-miR395b|bna-miR395c|bra-miR395d-3p|bra-miR395b-3p|bra-miR395c-3p|bra-miR395a-3p|cas-miR395a|cas-miR395d-3p|cme-miR395a|cme-miR395e|cme-miR395d|cme-miR395f|csi-miR395a|csi-miR395b-3p|csi-miR395c-3p|gma-miR395a|gma-miR395b|gma-miR395c|lus-miR395a|lus-miR395b|lus-miR395c|lus-miR395d|mdm-miR395…	529.449	71.73	987.168	13.7623	3.78265	1.09324e-298	1.72185e-297	Up	150.96	158.695	148.147	1797.69	1656.66	1701.52	CUGAAGUGUUUGGGGGAACUC
aly-miR396a-3p|ath-miR396a-3p|csi-miR396b-3p|eun-miR396a-3p|fve-miR396a-3p|fve-miR396c-3p|gma-miR396i-3p|mtr-miR396b-3p|sly-miR396a-3p	17.9491	29.4484	6.44991	0.219025	-2.19084	6.65687e-07	2.38673e-06	Down	51.0599	67.1402	69.9581	7.09148	11.7851	14.8532	GUUCAAUAAAGCUGUGGGAAG
aly-miR397a-5p|aly-miR397b-5p|ath-miR397a|bdi-miR397a|cas-miR397|cme-miR397|csi-miR397-5p|fve-miR397|gma-miR397a|gma-miR397b-5p|lus-miR397b|mes-miR397b|mtr-miR397-5p|osa-miR397a|ppe-miR397|ptc-miR397a|rco-miR397|sbi-miR397-5p|ssl-miR397|tcc-miR397|vca-miR397-5p|vvi-miR397a	23.2788	0	46.5576	Inf	Inf	5.99056e-27	3.0719e-26	Up	0	0	0	81.552	79.1289	82.5177	UCAUUGAGUGCAGCGUUGAUG
aly-miR399b-3p|aly-miR399c-3p|aof-miR399a|ath-miR399b|ath-miR399c-3p|csi-miR399d-3p|fve-miR399a|gma-miR399a|gma-miR399b|gma-miR399c|gma-miR399h|mdm-miR399i|mdm-miR399j|mes-miR399f|mtr-miR399l|mtr-miR399p|osa-miR399d|pab-miR399d|pvu-miR399a|rco-miR399a|sbi-miR399d|sbi-miR399i|tcc-miR399i|vun-miR399a|vvi-miR399b|vvi-miR399c|zma-miR399e-3p|zma-miR399i-3p|zma-miR399j-3p	275.824	371.425	180.222	0.485217	-1.0433	6.79119e-23	3.32769e-22	Down	717.058	811.785	843.613	349.255	308.098	283.861	UGCCAAAGGAGAGUUGCCCUG
ama-miR156	669.441	46.7145	1292.17	27.661	4.78978	0	0	Up	102.12	81.382	115.225	2295.86	2282.95	2171.87	CUGACAGAAGAGAGUGAGCAC
aof-miR166a|atr-miR166b|bdi-miR166f|csi-miR166b-3p|csi-miR166d-3p|csi-miR166g-3p|gma-miR166h-3p|gma-miR166k|pab-miR166e	1572.86	352.769	2792.94	7.91721	2.98499	0	0	Up	708.178	754.818	790.115	4816.89	4959.87	4815.74	UCUCGGACCAGGCUUCAUUCC
aof-miR167b|ata-miR167b-5p|ata-miR167d-5p|bdi-miR167c-5p|bdi-miR167d-5p|bdi-miR167e-5p|bdi-miR167g|ccl-miR167a|ccl-miR167b|cpa-miR167d|ctr-miR167|eun-miR167a-5p|gma-miR167g|mes-miR167d|mes-miR167e|mes-miR167f|ppe-miR167c|vca-miR167a-5p|vca-miR167b-5p	31834.7	56189.5	7479.84	0.133118	-2.90922	0	0	Down	113899	114996	113509	12500.9	12441.9	12357	UGAAGCUGCCAGCAUGAUCUGA
aof-miR167c|atr-miR167|cme-miR167d|cme-miR167f|csi-miR167c-5p|csi-miR167a-5p|dpr-miR167c|gma-miR167c|gma-miR167j|gso-miR167a|lja-miR167|lus-miR167f|lus-miR167g|lus-miR167i|mes-miR167a|mtr-miR167b-5p|osa-miR167d-5p|osa-miR167e-5p|osa-miR167f|osa-miR167g|osa-miR167h-5p|osa-miR167i-5p|osa-miR167j|ptc-miR167e|sbi-miR167d|sbi-miR167f|sbi-miR167g|sbi-miR167e|sbi-miR167c|sbi-miR167h|sof-miR167a|sof-miR1…	150.367	260.329	40.4051	0.155208	-2.68772	5.16381e-64	3.55819e-63	Down	603.838	524.914	532.916	49.6403	85.8632	75.9163	UGAAGCUGCCAGCAUGAUCUG
aof-miR171b|fve-miR171f-3p|gma-miR171k-3p|lja-miR171d-5p|mdm-miR171j|mdm-miR171k|mdm-miR171l|mes-miR171e|nta-miR171b|pab-miR171b|pab-miR171c|ppe-miR171b|ssl-miR171b|vvi-miR171f	38.0248	9.54734	66.5024	6.96554	2.80024	1.4e-18	6.49894e-18	Up	22.1999	12.2073	26.7487	122.328	111.117	113.874	UUGAGCCGCGCCAAUAUCACU
aof-miR171c|csi-miR171e-3p|csi-miR171g-3p|ctr-miR171|fve-miR171h|mdm-miR171a|mdm-miR171b|mdm-miR171p|mes-miR171a|ppe-miR171h	529.457	923.834	135.081	0.146217	-2.77381	5.17464e-175	5.85133e-174	Down	2031.3	1995.89	1868.29	232.246	252.539	221.148	UUGAGCCGCGUCAAUAUCUCC
aof-miR319b|atr-miR319b|atr-miR319d|atr-miR319e|cas-miR319c|csi-miR159d|fve-miR319|tcc-miR319|vvi-miR319e	36.6244	50.5086	22.7403	0.450227	-1.15128	5.54503e-05	0.00016749	Down	95.4597	113.935	113.168	37.2302	30.3047	51.161	UUUGGACUGAAGGGAGCUCCU
aof-miR393b|fve-miR393b|ghr-miR393|mdm-miR393a|mdm-miR393b|mdm-miR393c|mes-miR393c|mes-miR393d|osa-miR393b-5p|zma-miR393a-5p|zma-miR393c-5p	1651.75	2718.59	584.909	0.215152	-2.21657	8.47692e-216	1.09951e-214	Down	5405.79	5744.64	5412.96	1010.29	943.348	962.532	UCCAAAGGGAUCGCAUUGAUCU
aof-miR395a	8.99594	1.31132	16.6806	12.7204	3.66907	7.05021e-07	2.50737e-06	Up	2.21999	4.0691	2.05759	33.6845	35.3555	18.1539	UGAAGUGUUUGGGGGAACUCU
aof-miR396a|cme-miR396e|eun-miR396a-5p|mdm-miR396f|mdm-miR396g|ptc-miR396f	71.4628	106.363	36.5628	0.343756	-1.54054	9.46976e-07	3.31442e-06	Down	162.06	256.353	261.314	70.9148	58.9258	61.0631	UUCCACGGCUUUCUUGAACUG
aof-miR398|aqc-miR398b|bdi-miR398a|cca-miR398|cme-miR398a|csi-miR398b-3p|gma-miR398c|gma-miR398d|lus-miR398a|mdm-miR398b|mdm-miR398c|mes-miR398|mtr-miR398b|mtr-miR398c|nta-miR398|osa-miR398b|ppe-miR398a-3p|ptc-miR398b|ptc-miR398c-3p|rco-miR398b|tcc-miR398a|vvi-miR398b|vvi-miR398c	3.73107	0	7.46214	Inf	Inf	8.98674e-05	0.000269602	Up	0	0	0	10.6372	20.2031	8.25177	UGUGUUCUCAGGUCGCCCCUG
aof-miR5139a	15.0212	23.8106	6.23177	0.261723	-1.93389	3.63173e-05	0.000110455	Down	37.2959	61.952	60.4932	14.8921	8.83886	10.3972	GAAACCUGGCUCUGAUACCA
aof-miR5139b	11.1331	19.4081	2.85805	0.147261	-2.76355	4.20605e-06	1.35392e-05	Down	42.1799	34.5874	47.3246	0	6.73437	8.25177	AUCAACCUGGCUCUGAUACCA
aof-miR535|atr-miR535|cpa-miR535|eun-miR535a-5p|eun-miR535b-5p|mdm-miR535a|osa-miR535-5p|pab-miR535e|pab-miR535a|pab-miR535c|pab-miR535d|ppe-miR535a|ppt-miR535a|ppt-miR535b|ppt-miR535c|ppt-miR535d|rco-miR535|vvi-miR535a|vvi-miR535b|vvi-miR535c	7664.93	4174.22	11155.6	2.67251	1.4182	0	0	Up	9019.84	8915.4	8709.79	19232.1	19511.2	19538.5	UGACAACGAGAGAGAGCACGC
aof-miR8155	11.4759	17.7256	5.22618	0.294838	-1.76201	0.0106704	0.0257139	Down	60.6058	29.9079	28.0861	11.1691	5.30332	12.1301	GUAACCUGGCUCUGAUACCA
aqc-miR172b|ata-miR172c-3p|ath-miR172e-3p|bdi-miR172b|bna-miR172b|bna-miR172c|bra-miR172d-3p|cme-miR172d|gma-miR172i-3p|gma-miR172l|lus-miR172g|mdm-miR172i|mdm-miR172j|mdm-miR172k|nta-miR172j|osa-miR172b|ppe-miR172c|ptc-miR172d|ptc-miR172e|tcc-miR172c|zma-miR172e	164.664	296.507	32.8211	0.110692	-3.17537	2.75857e-88	2.29534e-87	Down	628.258	649.021	615.22	53.1861	57.2422	61.0631	GGAAUCUUGAUGAUGCUGCAU
aqc-miR535	7667.27	4143.13	11191.4	2.70119	1.4336	0	0	Up	8520.84	8329.54	8398.34	18473	18732	18606.3	UGACAACGAGAGAGAGCACGCG
ata-miR167f-5p|tae-miR167c-5p	365.796	616.889	114.703	0.185938	-2.42711	9.16726e-128	8.78861e-127	Down	1277.81	1293.42	1186.3	175.998	200.883	195.342	UGAAGCUGCCAGCAUGAUCUGC
ata-miR172a-3p	5.72921	10.162	1.29645	0.127579	-2.97054	0.000641344	0.00181303	Down	17.7599	28.4837	18.5183	1.77287	3.36719	1.65036	AGAAUCUUGAUGAUGCUGCGU
ata-miR393-5p	202.003	336.966	67.0407	0.198954	-2.32949	7.62897e-69	5.70233e-68	Down	748.138	665.298	738.676	117.009	97.6484	135.329	UUCCAAAGGGAUCGCAUUGAU
ata-miR395e-3p|ata-miR395a-3p|ata-miR395d-3p|ata-miR395f-3p|ata-miR395c-3p|bdi-miR395a|bdi-miR395b|bdi-miR395c-3p|bdi-miR395m|bdi-miR395e-3p|bdi-miR395f-3p|bdi-miR395g-3p|bdi-miR395h-3p|bdi-miR395j-3p|bdi-miR395k-3p|bdi-miR395l-3p|bdi-miR395n-3p|bdi-miR395o-3p|bdi-miR395q|cpa-miR395a|cpa-miR395b|cpa-miR395c|cpa-miR395d|cpa-miR395e|tae-miR395b	3.74219	0.349889	7.1345	20.3908	4.34984	0.000780963	0.00219366	Up	2.33099	0	0	11.1691	12.3744	15.5959	UGAAGUGUUUGGGGGAACUC
ata-miR396e-3p|bdi-miR396d-3p|bdi-miR396c-3p|vca-miR396-3p|zma-miR396b-3p|zma-miR396a-3p	3492.15	5547.96	1436.35	0.258896	-1.94955	0	0	Down	11635	11869.6	11917.6	2531.66	2432.79	2538.25	GUUCAAUAAAGCUGUGGGAAA
ata-miR399b-3p|ata-miR399a-3p|bdi-miR399b|bdi-miR399c|csi-miR399c-3p|gma-miR399i|lus-miR399b|lus-miR399d|mdm-miR399a|mdm-miR399b|mdm-miR399c|mes-miR399a|osa-miR399a|osa-miR399b|osa-miR399c|ptc-miR399f|ptc-miR399g|sbi-miR399a|sbi-miR399c|sbi-miR399h|sbi-miR399j|tcc-miR399g|vun-miR399b|vvi-miR399a|vvi-miR399h|zma-miR399a-3p|zma-miR399c-3p|zma-miR399h-3p	337.318	193.184	481.453	2.4922	1.31742	6.09241e-42	3.7316e-41	Up	344.099	437.428	452.67	835.021	853.582	826.828	UGCCAAAGGAGAAUUGCCCUG
ath-miR8175	428.866	728.822	128.91	0.176875	-2.4992	2.32978e-65	1.65715e-64	Down	1620.04	1758.16	1503.69	210.351	258.095	239.136	GAUCCCCGGCAACGGCGCCA
atr-miR319a|atr-miR319c|cme-miR319b|cme-miR319a|ctr-miR319|gma-miR319a|gma-miR319b|gma-miR319e|lus-miR319b|mtr-miR319a-3p|mtr-miR319b-3p|pab-miR319a|pab-miR319b|pab-miR319c|pab-miR319f|pab-miR319g|pab-miR319i|pab-miR319k|pab-miR319l|pab-miR319m|pab-miR319n|ppe-miR319a|ptc-miR319a|ptc-miR319b|ptc-miR319c|ptc-miR319d	1462.32	23.701	2900.93	122.397	6.93542	0	0	Up	55.9438	40.5893	62.6537	5312.76	5455.35	5146.63	UUGGACUGAAGGGAGCUCCC
atr-miR390.1	2.00805	4.0161	0	0	#NAME?	0.00867006	0.0211243	Down	13.32	6.10365	6.17278	0	0	0	UAAAGCUCAGGAGGGAUAGCG
bcy-miR156|bgy-miR156	407.554	19.6485	795.46	40.4845	5.3393	0	0	Up	55.0962	34.9573	29.461	1331.83	1322.62	1312.26	UUUGACAGAAGAUAGAGAGCAC
bdi-miR159a-3p	25.4763	8.93888	42.0138	4.70012	2.2327	1.45272e-06	4.96627e-06	Up	23.3099	21.3628	15.1233	102.383	61.8721	65.8492	CUUGGAUUGAAGGGAGCUCU
bdi-miR166e-3p	691.171	959.827	422.514	0.440198	-1.18378	1.1111e-65	8.03268e-65	Down	2120.09	2050.83	1954.71	733.968	722.261	750.912	CUCGGACCAGGCUUCAUUCCC
bdi-miR169c-3p	7.03499	2.33361	11.7364	5.02928	2.33035	0.00142308	0.00392238	Up	6.99298	6.40883	2.16047	22.3381	24.7488	17.3287	GGCAGGUUGUCCUUGGCUAC
bdi-miR319b-3p	4.36091	0	8.72181	Inf	Inf	1.66335e-05	5.16576e-05	Up	0	0	0	10.6372	15.1523	19.8043	UUGGACUGAAGGGUGCUCCCU
bdi-miR393a|bdi-miR393b-5p|bna-miR393|cme-miR393a|cme-miR393b|cme-miR393c|csi-miR393c-5p|fve-miR393a|gma-miR393a|lus-miR393a|lus-miR393b|lus-miR393c|lus-miR393d|mes-miR393a|mtr-miR393a|mtr-miR393b-5p|osa-miR393a|ppe-miR393b|ptc-miR393a-5p|ptc-miR393b-5p|ptc-miR393c|rco-miR393|sbi-miR393a|sbi-miR393b|tcc-miR393b|vca-miR393-5p|vvi-miR393b|vvi-miR393a	19.4547	32.0679	6.84143	0.213342	-2.22876	1.6073e-07	5.80999e-07	Down	79.9198	56.9674	67.9005	12.4101	10.1016	13.2028	UCCAAAGGGAUCGCAUUGAUC
bdi-miR5179|osa-miR5179	108.338	42.7746	173.902	4.06554	2.02345	1.11858e-30	6.09006e-30	Up	86.5798	111.9	74.0733	306.706	304.73	297.064	UUUUGCUCAAGACCGCGCAAC
bdi-miR529-5p|zma-miR529-5p	243.104	7.87094	478.337	60.7726	5.92535	7.53849e-205	9.4985e-204	Up	15.54	14.2418	20.5759	845.659	774.453	877.989	AGAAGAGAGAGAGUACAGCCU
bna-miR156a|hvu-miR156a|hvu-miR156b|rco-miR156a|rco-miR156b|rco-miR156c|rco-miR156d|ssl-miR156|ssp-miR156|tae-miR156	1354.38	91.6796	2617.08	28.5459	4.83521	0	0	Up	188.7	185.144	211.932	4616.55	4395.86	4657.3	UGACAGAAGAGAGUGAGCACA
bna-miR167a|bna-miR167b	520.449	236.475	804.423	3.40172	1.76626	7.61796e-105	6.71904e-104	Up	487.39	506.88	445.843	1363.98	1269.58	1376.85	UGAAGCUGCCAGCAUGAUCUAA
bna-miR167d|fve-miR167b|fve-miR167c|fve-miR167a|gma-miR167l|lja-miR167a|lja-miR167b|lja-miR167c|mes-miR167b	10.7743	18.9365	2.61198	0.137934	-2.85795	3.35545e-06	1.08805e-05	Down	55.9438	34.1804	36.728	5.58454	1.76777	6.93149	UGAAGCUGCCAGCAUGAUCU
bna-miR171g|cas-miR171a-3p	8.19136	1.3387	15.044	11.2378	3.49028	4.77322e-06	1.52536e-05	Up	4.23817	1.94207	1.96406	28.7688	32.1413	14.1781	UGAUUGAGCCGCGCCAAUAUCU
bna-miR397a|bna-miR397b	9.58419	0	19.1684	Inf	Inf	1.9669e-11	8.26097e-11	Up	0	0	0	28.7688	38.5696	28.3561	UCAUUGAGUGCAGCGUUGAUGU
cas-miR156g	7.44588	0.316415	14.5754	46.064	5.52557	8.27899e-08	3.0941e-07	Up	0	0	2.27418	21.5543	39.0771	23.713	GACAGAAGAGAGUGAGCAC
cas-miR5139|rgl-miR5139	11.5098	17.1749	5.84469	0.340304	-1.5551	0.00372464	0.00944003	Down	46.6199	31.482	43.2094	9.79743	14.8865	9.12038	AAACCUGGCUCUGAUACCA
cca-miR156b	9.11851	0.322509	17.9145	55.5473	5.79564	1.35495e-09	5.53271e-09	Up	0	2.03455	0	31.9116	30.3047	31.3567	UGACAGAAGAGAGUGAGCAUA
cca-miR396a-3p	9.3657	0.322509	18.4089	57.0802	5.83492	5.17403e-09	2.01925e-08	Up	0	2.03455	0	44.3217	28.6211	23.105	GUUCAAGAAAGCUGUGGGAAA
cca-miR396c	70.0053	1.3448	138.666	103.113	6.68808	3.39572e-72	2.58192e-71	Up	4.43999	4.0691	0	262.385	239.07	222.798	UUCAAGAAAGCUGUGGGAAAA
cme-miR156j	730.86	47.4234	1414.3	29.8228	4.89834	0	0	Up	125.026	64.0883	100.167	2396.27	2397.74	2259.04	GUUGACAGAAGAGAGUGAGCAC
cme-miR159b|osa-miR159e	176.308	4.14996	348.465	83.9683	6.39177	1.50767e-173	1.66221e-172	Up	0	12.2073	14.4031	638.233	597.676	584.226	AUUGGAUUGAAGGGAGCUCCU
cme-miR319c|cme-miR319d|gma-miR319c|ptc-miR319e|ptc-miR319f|ptc-miR319g|ptc-miR319h|stu-miR319b	11.8506	0	23.7011	Inf	Inf	5.12972e-14	2.30837e-13	Up	0	0	0	39.0918	40.6588	50.2533	UUGGACUGAAGGGAGCUCCU
cme-miR395b|cme-miR395c|mtr-miR395g	9.13868	1.04967	17.2277	16.4126	4.03673	9.3203e-08	3.45399e-07	Up	6.65998	0	0	28.3659	28.6211	33.0071	UUGAAGUGUUUGGGGGAACUC
cpa-miR159b|mdm-miR159a|mdm-miR159b|pab-miR159b|pab-miR159c	1765	48.6009	3481.4	71.6325	6.16254	0	0	Up	102.564	104.678	118.826	6370.1	6323.32	6402.96	CUUGGAUUGAAGGGAGCUCC
cpa-miR319|mes-miR319f	4.58127	0	9.16255	Inf	Inf	1.03317e-05	3.23142e-05	Up	0	0	0	20.4766	12.3744	17.3287	AUUGGACUGAAGGGAGCUCC
cpa-miR8155	9.76254	15.6871	3.83793	0.244654	-2.03118	0.00273493	0.00711163	Down	53.9809	29.2333	27.2902	1.95949	11.1649	9.12038	UAACCUGGCUCUGAUACCA
csi-miR159b-5p	12.1169	0.322509	23.9113	74.1414	6.21221	7.82523e-13	3.35041e-12	Up	0	2.03455	0	51.4132	42.0898	31.3567	AGCUGCCGACUCAUUCAUUCA
csi-miR159c-3p|ppt-miR319c|ppt-miR319d-3p|ppt-miR319e	1593.15	26.3207	3159.99	120.057	6.90758	0	0	Up	55.4999	56.9674	55.555	5605.81	5503.67	5398.31	CUUGGACUGAAGGGAGCUCCC
csi-miR160c-5p	13.4305	8.60419	18.2568	2.12185	1.08532	0.0238784	0.0560125	Up	22.1999	14.2418	18.5183	33.6845	30.3047	31.3567	UGCCUGGCUCCCUGUAUGCUU
csi-miR166i-3p|csi-miR166k-3p	3.32026	1.01619	5.62434	5.53472	2.46851	0.0307169	0.0701874	Up	4.43999	0	2.05759	15.9558	8.41797	4.95106	UCUUGGACCAGGCUUCAUUCC
csi-miR171b-3p|gma-miR171b-3p|mtr-miR171h|mtr-miR171g|ppe-miR171d-3p	10.311	18.0055	2.61641	0.145312	-2.78278	6.82546e-06	2.16549e-05	Down	31.0799	44.7601	39.0943	5.31861	5.05078	3.30071	CGAGCCGAAUCAAUAUCACUC
csi-miR393a	18.6267	29.0832	8.17024	0.280926	-1.83174	2.90476e-05	8.95805e-05	Down	48.739	48.5518	80.5267	15.2306	17.6777	7.87669	AUCCAAAGGGAUCGCAUUGAUC
csi-miR393b-5p|gma-miR393h|gma-miR393i|gma-miR393j|gma-miR393k	1594.2	2544	644.408	0.253305	-1.98105	1.88768e-216	2.60146e-215	Down	5390.95	5035.79	5075.14	1057.68	1097.63	1058.63	UUCCAAAGGGAUCGCAUUGAUC
eun-miR395-3p|gma-miR395i|gma-miR395j|gma-miR395k|gma-miR395l|gma-miR395m|mtr-miR395a|mtr-miR395c|mtr-miR395d|mtr-miR395e|mtr-miR395f|mtr-miR395i|mtr-miR395j|mtr-miR395l|mtr-miR395m|mtr-miR395n|mtr-miR395o|sbi-miR395f	621.875	205.296	1038.45	5.05833	2.33866	1.65164e-195	2.02326e-194	Up	408.479	459.808	442.382	1758.69	1846.9	1820.34	AUGAAGUGUUUGGGGGAACUC
fve-miR156b|fve-miR156a|fve-miR156c|fve-miR156e|gma-miR156k|gma-miR156n|gma-miR156o	782.875	48.8443	1516.91	31.0559	4.9568	0	0	Up	115.44	91.5547	104.937	2682.35	2569.16	2671.93	UUGACAGAAGAGAGUGAGCAC
fve-miR159c	181.542	4.92278	358.161	72.7559	6.18499	1.62325e-176	1.88382e-175	Up	8.87998	14.2418	8.23037	602.775	658.285	610.631	AUUGGAUUGAAGGGAGCUCCC
fve-miR164a-3p|pab-miR164a	20.5149	34.8002	6.22956	0.179009	-2.48189	1.11631e-08	4.24389e-08	Down	88.7998	79.3474	53.4974	14.1829	6.73437	11.5525	CACGUGCUCCCCUUCUCCAAC
fve-miR167d	14.1399	20.7773	7.50251	0.361092	-1.46956	0.00202066	0.00536813	Down	44.5008	44.6676	37.3172	13.5383	11.2495	12.6027	UGAAGCUGCCAGCAUGAUCUCA
fve-miR171f-5p|gma-miR171k-5p|gma-miR171l|lja-miR171d-3p|mtr-miR171e-5p	3.27283	0.949245	5.59641	5.89564	2.55965	0.0313056	0.0711637	Up	0	0	6.17278	14.1829	6.73437	8.25177	CGAUGUUGGUGAGGUUCAAUC
gma-miR156e|mdm-miR156p|mdm-miR156q|mdm-miR156r|mdm-miR156s|pab-miR156o|smo-miR156b	18257.1	438.561	36075.6	82.2588	6.3621	0	0	Up	872.458	998.964	927.974	62514.9	62710.5	63241.6	CUGACAGAAGAUAGAGAGCAC
gma-miR156g	1.43967	0	2.87934	Inf	Inf	0.0427984	0.0958077	Up	0	0	0	1.86151	3.53555	10.3972	ACAGAAGAUAGAGAGCACAG
gma-miR156q|gma-miR156s	682.132	47.9468	1316.32	27.4537	4.77893	0	0	Up	117.66	97.6584	90.534	2278.14	2306.52	2292.34	UGACAGAAGAGAGUGAGCACU
gma-miR156r	54.3786	4.30514	104.452	24.2622	4.60064	5.19701e-45	3.228e-44	Up	11.1	8.1382	8.23037	200.334	183.512	161.735	CUGACAGAAGAUAGAGAGCAU
gma-miR166u	9.11102	3.24938	14.9727	4.60785	2.20409	0.000519797	0.0014789	Up	4.66199	6.40883	10.8024	27.9227	19.4455	34.6574	UCUCGGACCAGGCUUCAUUC
gma-miR169c	11.1767	22.0368	0.316578	0.0143658	-6.12121	6.33669e-12	2.687e-11	Down	46.6199	44.7601	49.3822	0	0	1.65036	AAGCCAAGGAUGACUUGCCGA
gma-miR171m|gma-miR171t	6.02837	11.738	0.318791	0.027159	-5.20243	2.50731e-06	8.3137e-06	Down	17.7599	26.4491	30.8639	0	1.68359	0	UUGAGCCGCGUCAAUAUCUCA
gma-miR172k	109.152	189.216	29.0882	0.15373	-2.70153	3.6069e-48	2.27235e-47	Down	384.059	390.634	434.152	58.5047	48.8242	44.5596	UGAAUCUUGAUGAUGCUGCAU
gma-miR319g|gma-miR319l	17.505	0	35.01	Inf	Inf	1.82729e-20	8.75907e-20	Up	0	0	0	47.3839	72.318	55.1369	UUGGACUGAAGGGAGCUCCUUC
gma-miR319p	3.27307	0	6.54614	Inf	Inf	0.000314654	0.000906943	Up	0	0	0	14.1829	6.73437	13.2028	UUUUGGACUGAAGGGAGCUCC
gma-miR390b-5p|gma-miR390d|nta-miR390a|sly-miR390a-5p|stu-miR390-5p	59.4398	87.6849	31.1948	0.35576	-1.49102	5.9226e-11	2.46402e-10	Down	173.16	197.351	189.298	51.4132	43.7734	67.6646	AAGCUCAGGAGGGAUAGCACC
gma-miR396e	28182.1	40669.2	15695	0.385918	-1.37364	0	0	Down	82040.4	83039.1	82763.7	26426.7	26074.7	25763.1	UUCCACAGCUUUCUUGAACUGU
gma-miR396h	288.669	429.555	147.784	0.344038	-1.53936	2.08131e-48	1.33023e-47	Down	902.095	957.052	1021.9	243.858	296.986	270.328	UCCACAGCUUUCUUGAACUG
gma-miR4995	22.1716	36.9268	7.41651	0.200844	-2.31586	8.1274e-09	3.11668e-08	Down	86.5798	61.0365	88.4764	8.86434	5.05078	24.7553	AGGCAGUGGCUUGGUUAAGGG
gra-miR167a|gra-miR167b	815.644	1214.83	416.454	0.342807	-1.54453	2.81272e-123	2.58419e-122	Down	2521.91	2661.19	2571.99	730.422	727.312	717.904	UCAGAUCAUCUUGCAGCUUCA
han-miR3630-3p	2.42065	0	4.84131	Inf	Inf	0.00274145	0.00711163	Up	0	0	0	5.07685	11.2495	7.87669	UGUGGGAAUCUCUCUGAUGCUU
hbr-miR6173	37.1524	63.8134	10.4914	0.164407	-2.60466	1.16707e-16	5.30597e-16	Down	139.86	147.403	140.431	24.1997	21.2133	12.1301	AGCCGUAAACGAUGGAUACU
hci-miR156a	3.41449	0	6.82899	Inf	Inf	0.00123205	0.00343883	Up	0	0	0	11.1691	21.2133	5.19862	UGACAGAAGAGAGUGAGUAC
lja-miR168-3p	81.868	8.5829	155.153	18.077	4.17608	2.7037e-61	1.83436e-60	Up	19.0718	17.4786	15.7125	270.765	252.309	250.479	UCCCGCCUUGCAUCAACUGAAU
lus-miR167a|vvi-miR167c	12.2441	17.0349	7.45329	0.43753	-1.19255	0.0188113	0.044601	Down	33.2999	26.4491	49.3822	10.6372	13.4688	14.8532	UGAAGCUGCCAGCAUGAUCUC
mdm-miR167h|mdm-miR167i|mdm-miR167j|ppe-miR167d	18.9374	26.2324	11.6424	0.443815	-1.17197	0.00370134	0.00943521	Down	46.6199	58.2621	54.9938	13.5383	28.9272	15.7534	UGAAGCUGCCAGCAUGAUCUUA
mdm-miR396a	64.2951	90.0185	38.5718	0.428487	-1.22268	1.22725e-08	4.62579e-08	Down	179.82	203.455	191.356	78.0062	63.9765	59.4128	UUCCACAGCUUUCUUGAACAG
mdm-miR535d|ppe-miR535b	12.5556	7.48757	17.6236	2.35372	1.23494	0.015417	0.0369504	Up	11.1	14.2418	22.6335	33.6845	30.3047	28.056	UGACGACGAGAGAGAGCACGC
mes-miR160h	394.562	253.967	535.157	2.10719	1.07532	9.33765e-34	5.27937e-33	Up	468.226	501.561	510.998	828.778	846.994	876.984	UGCCUGGCUCCCUGUAUGCCAUU
mes-miR166i	76.1146	103.965	48.2638	0.464229	-1.10709	1.27936e-07	4.6628e-07	Down	215.339	244.146	203.702	92.1892	55.5586	103.972	UUGGACCAGGCUUCAUUCCCC
mes-miR319h|vun-miR319b	24.9153	0	49.8307	Inf	Inf	8.54168e-29	4.53841e-28	Up	0	0	0	88.6434	82.4961	89.1192	CUUGGACUGAAGGGAGCUCCU
mes-miR535a	20.5281	11.166	29.8903	2.67691	1.42057	0.000273789	0.000794348	Up	22.1999	24.4146	24.6911	47.8675	53.875	54.4617	UGACAACGAGAGAGAGCACGU
mes-miR535b	23.5285	12.7572	34.2998	2.68867	1.42689	0.000102832	0.00030641	Up	24.4199	16.2764	41.1518	67.369	62.2929	49.5106	UGACAACGAGAGAGAGCACGG
mtr-miR156b-3p	2.6377	0	5.2754	Inf	Inf	0.00170941	0.00462484	Up	0	0	0	13.5383	3.21413	9.45203	UGCUCACUCUCUAUCUGUCACC
mtr-miR156j	6.32383	0.699777	11.9479	17.0738	4.09371	1.00989e-05	3.18114e-05	Up	4.66199	0	0	14.8921	22.981	27.726	UGACAGAAGAGGGUGAGCAC
mtr-miR319a-5p	6.29605	0	12.5921	Inf	Inf	1.01502e-07	3.73018e-07	Up	0	0	0	14.1829	30.3047	21.4546	AGAGCUUCCUUCAGUCCACUC
mtr-miR319c-3p|vvi-miR319g	1519.83	22.6058	3017.06	133.464	7.0603	0	0	Up	62.1598	50.8638	30.8639	5463.98	5266.28	5030.28	UUGGACUGAAGGGAGCUCCCA
mtr-miR395h	2.95614	0.322509	5.58977	17.3321	4.11538	0.0170921	0.0407439	Up	0	2.03455	0	14.1829	1.68359	13.2028	AUGAAGUGUUUGGGGGAACUU
NW_021318815.1_2418	2436.18	4133.07	739.287	0.178871	-2.48301	0	0	Down	9151.48	9299.22	9255.46	1327.26	1347.04	1381.1	auggucuuauuugagcaaga
NW_021318846.1_2647_star	28265.3	40799.6	15731	0.385568	-1.37494	0	0	Down	87376.8	86673.9	86416.8	27499	27425.7	27257.3	uuccacagcuuucuugaacug
NW_021319083.1_4007	83.5006	0	167.001	Inf	Inf	1.2977e-94	1.12213e-93	Up	0	0	0	303.426	323.502	289.39	ugacgaugaugauuugauga
NW_021319269.1_5733	12.0316	1.68859	22.3745	13.2504	3.72797	3.6439e-09	1.43478e-08	Up	7.76998	2.37364	2.40052	39.2986	37.3197	59.6878	uguugacgggugacggag
NW_021319484.1_7120_star	5.97803	10.022	1.93403	0.192978	-2.37349	0.00369872	0.00943521	Down	31.0799	20.3455	12.3455	1.77287	6.73437	1.65036	guauuggcgugccucaaucua
NW_021320138.1_11162	50016.4	323.013	99709.8	308.686	8.27	0	0	Up	610.112	676.178	595.539	159473	159080	157057	gcuuggacugaagggagcucccu
NW_021320183.1_11446_star	10.0203	4.27167	15.769	3.69153	1.88422	0.00143829	0.00393968	Up	8.87998	8.1382	10.288	37.2302	25.2539	19.8043	ucuguuugucgcugauuguug
NW_021443228.1_13114	358.638	702.349	14.9257	0.021251	-5.55632	2.63448e-143	2.58179e-142	Down	1216	1431.31	1274.68	20.1664	19.1509	28.8812	aucagaucaugugguaguuucauc
NW_021443228.1_13114_star	168.934	286.956	50.9112	0.177418	-2.49478	9.26834e-65	6.48784e-64	Down	612.718	602.227	617.278	97.5078	84.1797	84.1681	ugaagcugccagcaugaucug
osa-miR159c	248.621	6.97645	490.265	70.2743	6.13493	3.29659e-238	4.68966e-237	Up	19.9799	10.1728	14.4031	874.024	865.367	821.877	AUUGGAUUGAAGGGAGCUCCA
osa-miR159d	173.62	4.98363	342.257	68.6762	6.10174	5.21042e-168	5.34371e-167	Up	13.32	12.2073	6.17278	602.775	601.043	584.226	AUUGGAUUGAAGGGAGCUCCG
osa-miR159f	25.8306	12.5959	39.0653	3.10143	1.63293	2.93819e-06	9.6697e-06	Up	35.5199	12.2073	32.9215	69.1419	55.5586	79.217	CUUGGAUUGAAGGGAGCUCUA
osa-miR395b|osa-miR395d|osa-miR395e|osa-miR395g|osa-miR395h|osa-miR395i|osa-miR395j|osa-miR395k|osa-miR395l|osa-miR395s|osa-miR395m|osa-miR395n|osa-miR395p|osa-miR395q|osa-miR395r|osa-miR395y|sbi-miR395b|sbi-miR395a|sbi-miR395d|sbi-miR395e|sbi-miR395c|sbi-miR395g|sbi-miR395h|sbi-miR395i|sbi-miR395j|tae-miR395a|zma-miR395b-3p|zma-miR395a-3p|zma-miR395d-3p|zma-miR395e-3p|zma-miR395f-3p|zma-miR395g-…	4.06395	0.672398	7.4555	11.0879	3.47092	0.00180049	0.00484155	Up	2.21999	2.03455	0	10.6372	15.1523	13.2028	GUGAAGUGUUUGGGGGAACUC
osa-miR396a-3p|osa-miR396b-3p	13.1667	24.0144	2.31891	0.0965631	-3.37238	5.74526e-09	2.22251e-08	Down	53.6129	51.2707	56.1723	7.44605	0	5.19862	GUUCAAUAAAGCUGUGGGAA
osa-miR5072	925.941	1609.56	242.322	0.150551	-2.73167	4.51986e-127	4.24098e-126	Down	3451.99	3280.16	3071.8	409.533	409.802	389.109	CGAUUCCCCAGCGGAGUCGCCA
osa-miR5083	49.1387	82.8015	15.4759	0.186904	-2.41963	7.27899e-14	3.24246e-13	Down	184.149	147.403	224.689	40.9533	24.7488	19.0616	AGACUACAAUUAUCUGAUCA
pab-miR156b|pab-miR156c|pab-miR156d|pab-miR156e|pab-miR156f|pab-miR156g|pab-miR156h|pab-miR156i|pab-miR156j|pab-miR156k	8.12502	0	16.25	Inf	Inf	9.0437e-10	3.72736e-09	Up	0	0	0	27.9227	28.2844	32.9246	UGACAGAAGAGAGUGGGCAC
pab-miR159e|pab-miR159j|pab-miR159k	2.43683	0	4.87366	Inf	Inf	0.0258349	0.0599641	Up	0	0	0	7.09148	16.8359	1.65036	CUUGGAUUCAAGGGAGCUCCU
pab-miR319e	1.7875	0	3.575	Inf	Inf	0.0244689	0.0570941	Up	0	0	0	5.58454	12.3744	1.73287	UUGAACUGAAGGGAGCUCCC
pab-miR396a-5p|vvi-miR396a	545.903	750.254	341.552	0.455249	-1.13527	7.30121e-27	3.70096e-26	Down	1502.94	1741.58	1543.19	599.23	585.89	599.079	UUCCACAGCUUUCUUGAACUA
ppt-miR319a|ppt-miR319b|sly-miR319a	11.6666	0	23.3331	Inf	Inf	7.99892e-14	3.52752e-13	Up	0	0	0	35.3687	40.6588	51.9862	CUUGGACUGAAGGGAGCUCC
ppt-miR529e|ppt-miR529f	11.4356	0	22.8711	Inf	Inf	1.72505e-13	7.53213e-13	Up	0	0	0	46.0946	31.9883	41.2589	AGAAGAGAGAGAGUACAGCCC
pta-miR159a	251.804	5.28176	498.326	94.3485	6.55993	5.85096e-249	8.60091e-248	Up	13.986	6.40883	15.1233	858.157	924.545	951.347	UUGGAUUGAAGGGAGCUCCA
pta-miR159c|smo-miR159	3341.95	98.4857	6585.41	66.8667	6.06322	0	0	Up	195.359	205.489	228.393	11598.1	11429.9	11374.2	CUUGGAUUGAAGGGAGCUCCC
pta-miR319	5.25854	0	10.5171	Inf	Inf	1.83571e-06	6.22729e-06	Up	0	0	0	27.4328	22.3298	10.9445	UUGGACUGAAGGGAGCUCC
ptc-miR159d|sbi-miR159b|sof-miR159c|zma-miR159c-3p|zma-miR159d-3p	1813.13	55.2609	3570.99	64.6206	6.01392	0	0	Up	117.66	109.866	125.513	6314.96	6175.42	6164.08	CUUGGAUUGAAGGGAGCUCCU
ptc-miR169s	1.49386	2.98772	0	0	#NAME?	0.032327	0.0731087	Down	8.87998	2.03455	8.23037	0	0	0	UCAGCCAAGGAUGACUUGCCG
ptc-miR319i	7.79116	0	15.5823	Inf	Inf	2.13566e-09	8.64061e-09	Up	0	0	0	26.0612	21.2133	38.1232	UUGGGCUGAAGGGAGCUCCC
ptc-miR390d-3p|sly-miR390a-3p	3.96359	0.666304	7.26087	10.8972	3.44589	0.00248455	0.00656099	Up	2.21999	0	2.05759	19.5016	10.1016	8.25177	CGCUAUCCAUCCUGAGUUUUA
ptc-miR6478	568.262	1000.11	136.412	0.136396	-2.87412	2.64517e-152	2.65118e-151	Down	2237.75	2126.11	2018.5	235.792	262.64	214.546	CCGACCUUAGCUCAGUUGGUG
sbi-miR156e|zma-miR156k-5p	3.23124	0.322509	6.13997	19.0381	4.25082	0.00253096	0.00664377	Up	0	2.13628	0	7.44605	17.6777	8.66436	UGACAGAAGAGAGCGAGCAC
sly-miR156e-5p	1.62368	0	3.24735	Inf	Inf	0.0227633	0.0536825	Up	0	0	0	5.58454	3.53555	8.66436	UGAUAGAAGAGAGUGAGCAC
sly-miR168a-3p	4383.68	7562.03	1205.33	0.159392	-2.64935	0	0	Down	16052.8	15963.1	16267.3	2022.84	2089.34	2185.07	CCUGCCUUGCAUCAACUGAAU
sly-miR169e-5p	29.2905	16.4629	42.118	2.55835	1.35522	3.59473e-05	0.000110089	Up	36.0245	23.3048	41.2454	79.5374	51.4261	78.7669	UAGCCAAGGAUGACUUGCCUUU
sly-miR171e|stu-miR171b-3p	3.47572	6.63265	0.318791	0.0480638	-4.37891	0.00146891	0.0039987	Down	17.7599	12.2073	12.3455	0	1.68359	0	UUGAGCCGCGUCAAUAUCUCU
sly-miR395a|sly-miR395b	528.853	66.5639	991.141	14.8901	3.89628	7.0173e-216	9.37767e-215	Up	139.86	139.829	125.7	1646.59	1554.03	1740.75	CUGAAGUGUUUGGGGGAACUCC
sly-miR403-3p	1.46539	0	2.93078	Inf	Inf	0.0347233	0.0781274	Up	0	0	0	5.31861	3.36719	6.60142	CUAGAUUCACGCACAAGCUCG
stu-miR156f-5p	2.28476	0	4.56952	Inf	Inf	0.00410395	0.0102832	Up	0	0	0	9.30756	7.07109	8.66436	CUGACAGAAGAGAGUGAGCA
stu-miR171d-5p	10.6329	20.2904	0.97545	0.0480745	-4.37858	2.16706e-09	8.68709e-09	Down	37.7399	34.5874	57.6126	1.77287	0	3.30071	AGAUAUUGGUGCGGUUCAAUU
vca-miR167b-3p	9.52958	17.0289	2.03026	0.119225	-3.06825	3.14665e-06	1.02791e-05	Down	28.8599	46.7946	32.9215	8.86434	1.68359	0	AGAUCAUGUUGCAGUUUCAUC
vca-miR396-5p|vvi-miR396b	353.837	483.815	223.858	0.462693	-1.11187	1.45005e-32	8.09457e-32	Down	1135.19	1057.46	1049.99	426.286	383.607	417.622	UUCCACAGCUUUCUUGAACU
vvi-miR156e	4.39813	0.949245	7.84702	8.26659	3.04729	0.00327395	0.00844334	Up	0	0	6.48142	16.7536	14.1422	12.1301	UGACAGAGGAGAGUGAGCAC
vvi-miR3630-3p	197.402	103.801	291.004	2.80348	1.48722	4.16709e-32	2.29711e-31	Up	218.266	217.512	196.406	505.993	443.55	500.958	UUUGGGAAUCUCUCUGAUGCAC
