# Supplementary material for: Whole-Transcriptome Sequencing Reveals the Global Molecular Responses and NAC Transcription Factors Involved in Drought Stress in Dendrobium catenatum
Source: Antioxidants (Basel). 2024 Jan 12;13(1):94. doi: 10.3390/antiox13010094 (PMC10812421; doi:10.3390/antiox13010094)
Supplement: Supplementary file 1 [file antioxidants-13-00094-s001.zip › Table S7-CeRNA data.xlsx]

## Sheet: ceRNA_lnc_above3
mRNA	mRNA_description	lncRNA	Shared_miRNA	Shared_miRNA_Number	CeRNA_Score	Pvalue
XM_020816120.2	probable WRKY transcription factor 43, transcript variant X2	TCONS_00005590	aly-miR159c-3p	5	0.454545	7.41585e-10
XM_020816120.2	probable WRKY transcription factor 43, transcript variant X2	TCONS_00005590	bdi-miR159b-3p.1	5	0.454545	7.41585e-10
XM_020816120.2	probable WRKY transcription factor 43, transcript variant X2	TCONS_00031314	aly-miR159c-3p	7	0.368421	2.61361e-15
XM_020816120.2	probable WRKY transcription factor 43, transcript variant X2	TCONS_00031314	bdi-miR159b-3p.1	7	0.368421	2.61361e-15
XM_020816120.2	probable WRKY transcription factor 43, transcript variant X2	TCONS_00032841	aly-miR159c-3p	5	0.185185	7.41585e-10
XM_020816120.2	probable WRKY transcription factor 43, transcript variant X2	TCONS_00032841	bdi-miR159b-3p.1	5	0.185185	7.41585e-10
XM_020816120.2	probable WRKY transcription factor 43, transcript variant X2	TCONS_00032842	aly-miR159c-3p	5	0.16129	7.41585e-10
XM_020816120.2	probable WRKY transcription factor 43, transcript variant X2	TCONS_00032842	bdi-miR159b-3p.1	5	0.16129	7.41585e-10
XM_020816120.2	probable WRKY transcription factor 43, transcript variant X2	XR_002303623.2	aly-miR159c-3p	7	0.269231	2.61361e-15
XM_020816120.2	probable WRKY transcription factor 43, transcript variant X2	XR_002303623.2	bdi-miR159b-3p.1	7	0.269231	2.61361e-15
XM_020816120.2	probable WRKY transcription factor 43, transcript variant X2	XR_002303625.2	aly-miR159c-3p	7	0.269231	2.61361e-15
XM_020816120.2	probable WRKY transcription factor 43, transcript variant X2	XR_002303625.2	bdi-miR159b-3p.1	7	0.269231	2.61361e-15
XM_020816120.2	probable WRKY transcription factor 43, transcript variant X2	XR_003701426.1	aly-miR157c-3p	6	0.214286	2.23406e-12
XM_020816120.2	probable WRKY transcription factor 43, transcript variant X2	XR_003701426.1	aly-miR159c-3p	6	0.214286	2.23406e-12
XM_020816120.2	probable WRKY transcription factor 43, transcript variant X2	XR_003701426.1	bdi-miR159b-3p.1	6	0.214286	2.23406e-12
XM_020816120.2	probable WRKY transcription factor 43, transcript variant X2	XR_003702492.1	aly-miR159c-3p	7	0.269231	2.61361e-15
XM_020816120.2	probable WRKY transcription factor 43, transcript variant X2	XR_003702492.1	bdi-miR159b-3p.1	7	0.269231	2.61361e-15
XM_020816120.2	probable WRKY transcription factor 43, transcript variant X2	XR_003702493.1	aly-miR159c-3p	7	0.269231	2.61361e-15
XM_020816120.2	probable WRKY transcription factor 43, transcript variant X2	XR_003702493.1	bdi-miR159b-3p.1	7	0.269231	2.61361e-15
XM_020816151.2	transcription factor GAMYB, transcript variant X1	XR_002302757.2	ahy-miR159	19	0.904762	6.03324e-09
XM_020816169.2	UDP-glycosyltransferase 83A1-like	TCONS_00023661	ata-miR169h-5p	13	0.590909	1.65794e-22
XM_020816534.2	probable E3 ubiquitin-protein ligase HIP1, transcript variant X1	XR_002302966.2	NW_021390876.1_12379	5	0.3125	8.4984e-08
XM_020816534.2	probable E3 ubiquitin-protein ligase HIP1, transcript variant X1	XR_002303972.2	NW_021390876.1_12379	6	0.315789	1.0356e-09
XM_020816534.2	probable E3 ubiquitin-protein ligase HIP1, transcript variant X1	XR_003699719.1	NW_021390876.1_12379	8	0.275862	3.22125e-14
XM_020816534.2	probable E3 ubiquitin-protein ligase HIP1, transcript variant X1	XR_003700684.1	NW_021390876.1_12379	6	0.285714	1.0356e-09
XM_020816534.2	probable E3 ubiquitin-protein ligase HIP1, transcript variant X1	XR_003701266.1	NW_021390876.1_12379	4	0.5	4.39205e-06
XM_020816534.2	probable E3 ubiquitin-protein ligase HIP1, transcript variant X1	XR_003701267.1	NW_021390876.1_12379	4	0.5	4.39205e-06
XM_020816534.2	probable E3 ubiquitin-protein ligase HIP1, transcript variant X1	XR_003701268.1	NW_021390876.1_12379	4	0.5	4.39205e-06
XM_020816534.2	probable E3 ubiquitin-protein ligase HIP1, transcript variant X1	XR_003701269.1	NW_021390876.1_12379	4	0.8	4.39205e-06
XM_020816534.2	probable E3 ubiquitin-protein ligase HIP1, transcript variant X1	XR_003701328.1	NW_021390876.1_12379	8	0.119403	3.22125e-14
XM_020816534.2	probable E3 ubiquitin-protein ligase HIP1, transcript variant X1	XR_003701390.1	NW_021390876.1_12379	3	0.0810811	0.000145045
XM_020816534.2	probable E3 ubiquitin-protein ligase HIP1, transcript variant X1	XR_003703327.1	NW_021390876.1_12379	4	0.235294	4.39205e-06
XM_020816536.2	probable E3 ubiquitin-protein ligase HIP1, transcript variant X3	TCONS_00000917	bra-miR168b-5p	3	0.3	0.0002931
XM_020816536.2	probable E3 ubiquitin-protein ligase HIP1, transcript variant X3	XR_002302966.2	NW_021390876.1_12379	5	0.3125	2.855e-07
XM_020816536.2	probable E3 ubiquitin-protein ligase HIP1, transcript variant X3	XR_002303972.2	NW_021390876.1_12379	6	0.315789	4.75234e-09
XM_020816536.2	probable E3 ubiquitin-protein ligase HIP1, transcript variant X3	XR_003699719.1	NW_021390876.1_12379	8	0.275862	3.35224e-13
XM_020816536.2	probable E3 ubiquitin-protein ligase HIP1, transcript variant X3	XR_003700684.1	NW_021390876.1_12379	6	0.285714	4.75234e-09
XM_020816536.2	probable E3 ubiquitin-protein ligase HIP1, transcript variant X3	XR_003701266.1	NW_021390876.1_12379	4	0.5	1.1261e-05
XM_020816536.2	probable E3 ubiquitin-protein ligase HIP1, transcript variant X3	XR_003701267.1	NW_021390876.1_12379	4	0.5	1.1261e-05
XM_020816536.2	probable E3 ubiquitin-protein ligase HIP1, transcript variant X3	XR_003701268.1	NW_021390876.1_12379	4	0.5	1.1261e-05
XM_020816536.2	probable E3 ubiquitin-protein ligase HIP1, transcript variant X3	XR_003701269.1	NW_021390876.1_12379	4	0.8	1.1261e-05
XM_020816536.2	probable E3 ubiquitin-protein ligase HIP1, transcript variant X3	XR_003701390.1	NW_021390876.1_12379	3	0.0810811	0.0002931
XM_020816536.2	probable E3 ubiquitin-protein ligase HIP1, transcript variant X3	XR_003701602.1	NW_021390876.1_12379	5	0.333333	2.855e-07
XM_020816536.2	probable E3 ubiquitin-protein ligase HIP1, transcript variant X3	XR_003703113.1	bra-miR168b-5p	5	0.384615	2.855e-07
XM_020816536.2	probable E3 ubiquitin-protein ligase HIP1, transcript variant X3	XR_003703113.1	sly-miR168a-3p	5	0.384615	2.855e-07
XM_020816536.2	probable E3 ubiquitin-protein ligase HIP1, transcript variant X3	XR_003703327.1	NW_021390876.1_12379	4	0.235294	1.1261e-05
XM_020816537.2	probable E3 ubiquitin-protein ligase HIP1, transcript variant X4	XR_002302966.2	NW_021390876.1_12379	5	0.3125	8.4984e-08
XM_020816537.2	probable E3 ubiquitin-protein ligase HIP1, transcript variant X4	XR_002303972.2	NW_021390876.1_12379	6	0.315789	1.0356e-09
XM_020816537.2	probable E3 ubiquitin-protein ligase HIP1, transcript variant X4	XR_003699719.1	NW_021390876.1_12379	8	0.275862	3.22125e-14
XM_020816537.2	probable E3 ubiquitin-protein ligase HIP1, transcript variant X4	XR_003700684.1	NW_021390876.1_12379	6	0.285714	1.0356e-09
XM_020816537.2	probable E3 ubiquitin-protein ligase HIP1, transcript variant X4	XR_003701266.1	NW_021390876.1_12379	4	0.5	4.39205e-06
XM_020816537.2	probable E3 ubiquitin-protein ligase HIP1, transcript variant X4	XR_003701267.1	NW_021390876.1_12379	4	0.5	4.39205e-06
XM_020816537.2	probable E3 ubiquitin-protein ligase HIP1, transcript variant X4	XR_003701268.1	NW_021390876.1_12379	4	0.5	4.39205e-06
XM_020816537.2	probable E3 ubiquitin-protein ligase HIP1, transcript variant X4	XR_003701269.1	NW_021390876.1_12379	4	0.8	4.39205e-06
XM_020816537.2	probable E3 ubiquitin-protein ligase HIP1, transcript variant X4	XR_003701328.1	NW_021390876.1_12379	8	0.119403	3.22125e-14
XM_020816537.2	probable E3 ubiquitin-protein ligase HIP1, transcript variant X4	XR_003701390.1	NW_021390876.1_12379	3	0.0810811	0.000145045
XM_020816537.2	probable E3 ubiquitin-protein ligase HIP1, transcript variant X4	XR_003701602.1	NW_021390876.1_12379	5	0.333333	8.4984e-08
XM_020816537.2	probable E3 ubiquitin-protein ligase HIP1, transcript variant X4	XR_003703113.1	sly-miR168a-3p	4	0.307692	4.39205e-06
XM_020816537.2	probable E3 ubiquitin-protein ligase HIP1, transcript variant X4	XR_003703327.1	NW_021390876.1_12379	4	0.235294	4.39205e-06
XM_020816635.2	transcription elongation factor SPT6 homolog, transcript variant X2	TCONS_00018697	aly-miR167a-5p	11	0.916667	1.58459e-13
XM_020816635.2	transcription elongation factor SPT6 homolog, transcript variant X2	TCONS_00018697	bna-miR167a	11	0.916667	1.58459e-13
XM_020816635.2	transcription elongation factor SPT6 homolog, transcript variant X2	TCONS_00026869	aly-miR167a-5p	14	0.933333	9.36109e-20
XM_020816635.2	transcription elongation factor SPT6 homolog, transcript variant X2	TCONS_00026869	bna-miR167a	14	0.933333	9.36109e-20
XM_020816635.2	transcription elongation factor SPT6 homolog, transcript variant X2	XR_003702199.1	aly-miR167a-5p	12	0.315789	1.89604e-15
XM_020816635.2	transcription elongation factor SPT6 homolog, transcript variant X2	XR_003702199.1	bna-miR167a	12	0.315789	1.89604e-15
XM_020816635.2	transcription elongation factor SPT6 homolog, transcript variant X2	XR_003702200.1	aly-miR167a-5p	12	0.333333	1.89604e-15
XM_020816635.2	transcription elongation factor SPT6 homolog, transcript variant X2	XR_003702200.1	bna-miR167a	12	0.333333	1.89604e-15
XM_020816635.2	transcription elongation factor SPT6 homolog, transcript variant X2	XR_003702596.1	eun-miR172c-5p	5	0.2	0.000107866
XM_020816635.2	transcription elongation factor SPT6 homolog, transcript variant X2	XR_003702767.1	eun-miR172c-5p	5	0.138889	0.000107866
XM_020816692.2	pentatricopeptide repeat-containing protein At2g31400, chloroplastic	TCONS_00005590	aly-miR159c-3p	3	0.272727	2.75137e-05
XM_020816692.2	pentatricopeptide repeat-containing protein At2g31400, chloroplastic	TCONS_00005590	bdi-miR159b-3p.1	3	0.272727	2.75137e-05
XM_020816692.2	pentatricopeptide repeat-containing protein At2g31400, chloroplastic	TCONS_00031314	aly-miR159c-3p	3	0.157895	2.75137e-05
XM_020816692.2	pentatricopeptide repeat-containing protein At2g31400, chloroplastic	TCONS_00031314	bdi-miR159b-3p.1	3	0.157895	2.75137e-05
XM_020816692.2	pentatricopeptide repeat-containing protein At2g31400, chloroplastic	TCONS_00032841	aly-miR159c-3p	4	0.148148	4.66047e-07
XM_020816692.2	pentatricopeptide repeat-containing protein At2g31400, chloroplastic	TCONS_00032841	bdi-miR159b-3p.1	4	0.148148	4.66047e-07
XM_020816692.2	pentatricopeptide repeat-containing protein At2g31400, chloroplastic	TCONS_00032841	pta-miR159a	4	0.148148	4.66047e-07
XM_020816692.2	pentatricopeptide repeat-containing protein At2g31400, chloroplastic	TCONS_00032842	aly-miR159c-3p	4	0.129032	4.66047e-07
XM_020816692.2	pentatricopeptide repeat-containing protein At2g31400, chloroplastic	TCONS_00032842	bdi-miR159b-3p.1	4	0.129032	4.66047e-07
XM_020816692.2	pentatricopeptide repeat-containing protein At2g31400, chloroplastic	TCONS_00032842	pta-miR159a	4	0.129032	4.66047e-07
XM_020816692.2	pentatricopeptide repeat-containing protein At2g31400, chloroplastic	XR_002303623.2	aly-miR159c-3p	3	0.115385	2.75137e-05
XM_020816692.2	pentatricopeptide repeat-containing protein At2g31400, chloroplastic	XR_002303623.2	bdi-miR159b-3p.1	3	0.115385	2.75137e-05
XM_020816692.2	pentatricopeptide repeat-containing protein At2g31400, chloroplastic	XR_002303625.2	aly-miR159c-3p	3	0.115385	2.75137e-05
XM_020816692.2	pentatricopeptide repeat-containing protein At2g31400, chloroplastic	XR_002303625.2	bdi-miR159b-3p.1	3	0.115385	2.75137e-05
XM_020816692.2	pentatricopeptide repeat-containing protein At2g31400, chloroplastic	XR_003701426.1	aly-miR159c-3p	3	0.107143	2.75137e-05
XM_020816692.2	pentatricopeptide repeat-containing protein At2g31400, chloroplastic	XR_003701426.1	bdi-miR159b-3p.1	3	0.107143	2.75137e-05
XM_020816692.2	pentatricopeptide repeat-containing protein At2g31400, chloroplastic	XR_003702492.1	aly-miR159c-3p	3	0.115385	2.75137e-05
XM_020816692.2	pentatricopeptide repeat-containing protein At2g31400, chloroplastic	XR_003702492.1	bdi-miR159b-3p.1	3	0.115385	2.75137e-05
XM_020816692.2	pentatricopeptide repeat-containing protein At2g31400, chloroplastic	XR_003702493.1	aly-miR159c-3p	3	0.115385	2.75137e-05
XM_020816692.2	pentatricopeptide repeat-containing protein At2g31400, chloroplastic	XR_003702493.1	bdi-miR159b-3p.1	3	0.115385	2.75137e-05
XM_020816844.2	S-norcoclaurine synthase 1-like	XR_003702596.1	eun-miR172c-5p	7	0.28	3.23338e-17
XM_020816844.2	S-norcoclaurine synthase 1-like	XR_003702767.1	eun-miR172c-5p	5	0.138889	8.32271e-11
XM_020816907.2	pentatricopeptide repeat-containing protein At3g22690	TCONS_00037662	pta-miR159a	3	0.214286	6.67213e-10
XM_020816927.2	dicarboxylate transporter 2.1, chloroplastic	TCONS_00024879	aly-miR160a-5p	8	0.727273	3.22125e-14
XM_020816927.2	dicarboxylate transporter 2.1, chloroplastic	TCONS_00024879	csi-miR160c-5p	8	0.727273	3.22125e-14
XM_020816927.2	dicarboxylate transporter 2.1, chloroplastic	TCONS_00024879	mes-miR160g	8	0.727273	3.22125e-14
XM_020816927.2	dicarboxylate transporter 2.1, chloroplastic	TCONS_00024879	mes-miR160h	8	0.727273	3.22125e-14
XM_020816934.2	protein NRT1/ PTR FAMILY 5.10	TCONS_00017118	cca-miR396a-3p	6	1	1.83157e-10
XM_020816934.2	protein NRT1/ PTR FAMILY 5.10	TCONS_00017118	cca-miR396c	6	1	1.83157e-10
XM_020816934.2	protein NRT1/ PTR FAMILY 5.10	TCONS_00024832	ata-miR395e-3p	3	0.25	6.63062e-05
XM_020816934.2	protein NRT1/ PTR FAMILY 5.10	TCONS_00024832	cme-miR395b	3	0.25	6.63062e-05
XM_020816934.2	protein NRT1/ PTR FAMILY 5.10	TCONS_00025990	aof-miR395a	3	0.25	6.63062e-05
XM_020816934.2	protein NRT1/ PTR FAMILY 5.10	TCONS_00025990	ata-miR395e-3p	3	0.25	6.63062e-05
XM_020816934.2	protein NRT1/ PTR FAMILY 5.10	TCONS_00025990	cme-miR395b	3	0.25	6.63062e-05
XM_020816934.2	protein NRT1/ PTR FAMILY 5.10	XR_002303327.2	cca-miR396a-3p	4	0.190476	1.53309e-06
XM_020816934.2	protein NRT1/ PTR FAMILY 5.10	XR_002303327.2	cca-miR396c	4	0.190476	1.53309e-06
XM_020816945.2	uncharacterized LOC110092415	TCONS_00000010	ahy-miR156c	4	0.4	4.66047e-07
XM_020816945.2	uncharacterized LOC110092415	TCONS_00005541	ahy-miR156c	4	1	4.66047e-07
XM_020816945.2	uncharacterized LOC110092415	TCONS_00032841	cme-miR159b	5	0.185185	4.57024e-09
XM_020816945.2	uncharacterized LOC110092415	TCONS_00032841	fve-miR159c	5	0.185185	4.57024e-09
XM_020816945.2	uncharacterized LOC110092415	TCONS_00032841	osa-miR159d	5	0.185185	4.57024e-09
XM_020816945.2	uncharacterized LOC110092415	TCONS_00032841	pta-miR159a	5	0.185185	4.57024e-09
XM_020816945.2	uncharacterized LOC110092415	TCONS_00032842	cme-miR159b	5	0.16129	4.57024e-09
XM_020816945.2	uncharacterized LOC110092415	TCONS_00032842	fve-miR159c	5	0.16129	4.57024e-09
XM_020816945.2	uncharacterized LOC110092415	TCONS_00032842	osa-miR159d	5	0.16129	4.57024e-09
XM_020816945.2	uncharacterized LOC110092415	TCONS_00032842	pta-miR159a	5	0.16129	4.57024e-09
XM_020816945.2	uncharacterized LOC110092415	TCONS_00033747	ahy-miR156c	3	0.1875	2.75137e-05
XM_020816945.2	uncharacterized LOC110092415	TCONS_00034483	ahy-miR156c	4	0.285714	4.66047e-07
XM_020816945.2	uncharacterized LOC110092415	TCONS_00036429	ahy-miR156c	4	0.285714	4.66047e-07
XM_020816945.2	uncharacterized LOC110092415	TCONS_00037662	cme-miR159b	6	0.428571	2.45699e-11
XM_020816945.2	uncharacterized LOC110092415	TCONS_00037662	fve-miR159c	6	0.428571	2.45699e-11
XM_020816945.2	uncharacterized LOC110092415	TCONS_00037662	osa-miR159c	6	0.428571	2.45699e-11
XM_020816945.2	uncharacterized LOC110092415	TCONS_00037662	osa-miR159d	6	0.428571	2.45699e-11
XM_020816945.2	uncharacterized LOC110092415	TCONS_00037662	pta-miR159a	6	0.428571	2.45699e-11
XM_020816945.2	uncharacterized LOC110092415	XR_003699864.1	ahy-miR156c	4	0.666667	4.66047e-07
XM_020816945.2	uncharacterized LOC110092415	XR_003701135.1	ahy-miR156c	4	0.4	4.66047e-07
XM_020816945.2	uncharacterized LOC110092415	XR_003702767.1	cme-miR159b	4	0.111111	4.66047e-07
XM_020816945.2	uncharacterized LOC110092415	XR_003702767.1	fve-miR159c	4	0.111111	4.66047e-07
XM_020816945.2	uncharacterized LOC110092415	XR_003702767.1	osa-miR159c	4	0.111111	4.66047e-07
XM_020816945.2	uncharacterized LOC110092415	XR_003702767.1	osa-miR159d	4	0.111111	4.66047e-07
XM_020816968.2	protein TSS	TCONS_00017086	cme-miR159b	12	0.705882	0.00175771
XM_020816968.2	protein TSS	TCONS_00017086	cpa-miR159b	12	0.705882	0.00175771
XM_020816968.2	protein TSS	TCONS_00017086	fve-miR159c	12	0.705882	0.00175771
XM_020816968.2	protein TSS	TCONS_00017086	osa-miR159c	12	0.705882	0.00175771
XM_020816968.2	protein TSS	TCONS_00017086	osa-miR159d	12	0.705882	0.00175771
XM_020816968.2	protein TSS	TCONS_00017086	pta-miR159c	12	0.705882	0.00175771
XM_020816968.2	protein TSS	TCONS_00017086	ptc-miR159d	12	0.705882	0.00175771
XM_020816968.2	protein TSS	TCONS_00018697	aly-miR167a-5p	11	0.916667	0.00581456
XM_020816968.2	protein TSS	TCONS_00018697	bna-miR167a	11	0.916667	0.00581456
XM_020816968.2	protein TSS	TCONS_00026869	aly-miR167a-5p	13	0.866667	0.000470223
XM_020816968.2	protein TSS	TCONS_00026869	bna-miR167a	13	0.866667	0.000470223
XM_020816968.2	protein TSS	TCONS_00032841	aly-miR159c-3p	13	0.481481	0.000470223
XM_020816968.2	protein TSS	TCONS_00032841	bdi-miR159a-3p	13	0.481481	0.000470223
XM_020816968.2	protein TSS	TCONS_00032841	cme-miR159b	13	0.481481	0.000470223
XM_020816968.2	protein TSS	TCONS_00032841	cpa-miR159b	13	0.481481	0.000470223
XM_020816968.2	protein TSS	TCONS_00032841	fve-miR159c	13	0.481481	0.000470223
XM_020816968.2	protein TSS	TCONS_00032841	osa-miR159d	13	0.481481	0.000470223
XM_020816968.2	protein TSS	TCONS_00032841	osa-miR159f	13	0.481481	0.000470223
XM_020816968.2	protein TSS	TCONS_00032841	pta-miR159a	13	0.481481	0.000470223
XM_020816968.2	protein TSS	TCONS_00032841	pta-miR159c	13	0.481481	0.000470223
XM_020816968.2	protein TSS	TCONS_00032841	ptc-miR159d	13	0.481481	0.000470223
XM_020816968.2	protein TSS	TCONS_00032842	aly-miR159c-3p	13	0.419355	0.000470223
XM_020816968.2	protein TSS	TCONS_00032842	bdi-miR159a-3p	13	0.419355	0.000470223
XM_020816968.2	protein TSS	TCONS_00032842	cme-miR159b	13	0.419355	0.000470223
XM_020816968.2	protein TSS	TCONS_00032842	cpa-miR159b	13	0.419355	0.000470223
XM_020816968.2	protein TSS	TCONS_00032842	fve-miR159c	13	0.419355	0.000470223
XM_020816968.2	protein TSS	TCONS_00032842	osa-miR159d	13	0.419355	0.000470223
XM_020816968.2	protein TSS	TCONS_00032842	osa-miR159f	13	0.419355	0.000470223
XM_020816968.2	protein TSS	TCONS_00032842	pta-miR159a	13	0.419355	0.000470223
XM_020816968.2	protein TSS	TCONS_00032842	pta-miR159c	13	0.419355	0.000470223
XM_020816968.2	protein TSS	TCONS_00032842	ptc-miR159d	13	0.419355	0.000470223
XM_020816968.2	protein TSS	XR_002305298.2	bdi-miR159a-3p	10	0.588235	0.0169849
XM_020816968.2	protein TSS	XR_002305298.2	cpa-miR159b	10	0.588235	0.0169849
XM_020816968.2	protein TSS	XR_002305298.2	gma-miR319p	10	0.588235	0.0169849
XM_020816968.2	protein TSS	XR_002305298.2	osa-miR159f	10	0.588235	0.0169849
XM_020816968.2	protein TSS	XR_002305298.2	pta-miR159c	10	0.588235	0.0169849
XM_020816968.2	protein TSS	XR_002305298.2	ptc-miR159d	10	0.588235	0.0169849
XM_020816968.2	protein TSS	XR_003701426.1	aau-miR319	10	0.357143	0.0169849
XM_020816968.2	protein TSS	XR_003701426.1	aly-miR159c-3p	10	0.357143	0.0169849
XM_020816968.2	protein TSS	XR_003701426.1	gma-miR319g	10	0.357143	0.0169849
XM_020816968.2	protein TSS	XR_003701426.1	gma-miR319p	10	0.357143	0.0169849
XM_020816968.2	protein TSS	XR_003701426.1	mtr-miR319c-3p	10	0.357143	0.0169849
XM_020816968.2	protein TSS	XR_003702199.1	aly-miR167a-5p	13	0.342105	0.000470223
XM_020816968.2	protein TSS	XR_003702199.1	bna-miR167a	13	0.342105	0.000470223
XM_020816968.2	protein TSS	XR_003702200.1	aly-miR167a-5p	12	0.333333	0.00175771
XM_020816968.2	protein TSS	XR_003702200.1	bna-miR167a	12	0.333333	0.00175771
XM_020816971.2	uncharacterized LOC110092428	TCONS_00032841	bdi-miR159a-3p	5	0.185185	2.855e-07
XM_020816971.2	uncharacterized LOC110092428	TCONS_00032841	cpa-miR159b	5	0.185185	2.855e-07
XM_020816971.2	uncharacterized LOC110092428	TCONS_00032841	osa-miR159f	5	0.185185	2.855e-07
XM_020816971.2	uncharacterized LOC110092428	TCONS_00032841	pta-miR159c	5	0.185185	2.855e-07
XM_020816971.2	uncharacterized LOC110092428	TCONS_00032841	ptc-miR159d	5	0.185185	2.855e-07
XM_020816971.2	uncharacterized LOC110092428	TCONS_00032842	bdi-miR159a-3p	5	0.16129	2.855e-07
XM_020816971.2	uncharacterized LOC110092428	TCONS_00032842	cpa-miR159b	5	0.16129	2.855e-07
XM_020816971.2	uncharacterized LOC110092428	TCONS_00032842	osa-miR159f	5	0.16129	2.855e-07
XM_020816971.2	uncharacterized LOC110092428	TCONS_00032842	pta-miR159c	5	0.16129	2.855e-07
XM_020816971.2	uncharacterized LOC110092428	TCONS_00032842	ptc-miR159d	5	0.16129	2.855e-07
XM_020816971.2	uncharacterized LOC110092428	XR_002305298.2	bdi-miR159a-3p	5	0.294118	2.855e-07
XM_020816971.2	uncharacterized LOC110092428	XR_002305298.2	cpa-miR159b	5	0.294118	2.855e-07
XM_020816971.2	uncharacterized LOC110092428	XR_002305298.2	osa-miR159f	5	0.294118	2.855e-07
XM_020816971.2	uncharacterized LOC110092428	XR_002305298.2	pta-miR159c	5	0.294118	2.855e-07
XM_020816971.2	uncharacterized LOC110092428	XR_002305298.2	ptc-miR159d	5	0.294118	2.855e-07
XM_020816971.2	uncharacterized LOC110092428	XR_003702596.1	eun-miR172c-5p	3	0.12	0.0002931
XM_020816971.2	uncharacterized LOC110092428	XR_003702767.1	eun-miR172c-5p	3	0.0833333	0.0002931
XM_020816993.2	uncharacterized LOC110092436, transcript variant X1	TCONS_00010551	aof-miR395a	4	1	0
XM_020816993.2	uncharacterized LOC110092436, transcript variant X1	TCONS_00010551	osa-miR395b	4	1	0
XM_020816993.2	uncharacterized LOC110092436, transcript variant X1	TCONS_00023668	aof-miR395a	3	0.5	6.67213e-10
XM_020816993.2	uncharacterized LOC110092436, transcript variant X1	TCONS_00023668	ata-miR395e-3p	3	0.5	6.67213e-10
XM_020816993.2	uncharacterized LOC110092436, transcript variant X1	TCONS_00024832	ata-miR395e-3p	4	0.333333	0
XM_020816993.2	uncharacterized LOC110092436, transcript variant X1	TCONS_00025990	aof-miR395a	4	0.333333	0
XM_020816993.2	uncharacterized LOC110092436, transcript variant X1	TCONS_00025990	ata-miR395e-3p	4	0.333333	0
XM_020816993.2	uncharacterized LOC110092436, transcript variant X1	TCONS_00025990	osa-miR395b	4	0.333333	0
XM_020816993.2	uncharacterized LOC110092436, transcript variant X1	TCONS_00032470	aof-miR395a	3	0.3	6.67213e-10
XM_020816993.2	uncharacterized LOC110092436, transcript variant X1	TCONS_00032470	ata-miR395e-3p	3	0.3	6.67213e-10
XM_020816993.2	uncharacterized LOC110092436, transcript variant X1	XR_002303785.2	ata-miR395e-3p	3	0.75	6.67213e-10
XM_020817021.2	RNA-binding protein 38, transcript variant X1	XR_003699559.1	NW_021390876.1_12379	3	0.5	3.17353e-06
XM_020817021.2	RNA-binding protein 38, transcript variant X1	XR_003701390.1	NW_021390876.1_12379	3	0.0810811	3.17353e-06
XM_020817200.2	60S ribosomal protein L3, transcript variant X1	TCONS_00017118	cca-miR396a-3p	6	1	4.75234e-09
XM_020817200.2	60S ribosomal protein L3, transcript variant X1	TCONS_00017118	cca-miR396c	6	1	4.75234e-09
XM_020817200.2	60S ribosomal protein L3, transcript variant X1	TCONS_00024929	cca-miR396a-3p	3	1	0.0002931
XM_020817200.2	60S ribosomal protein L3, transcript variant X1	TCONS_00024929	csi-miR396a-3p	3	1	0.0002931
XM_020817200.2	60S ribosomal protein L3, transcript variant X1	XR_002303327.2	cca-miR396a-3p	10	0.47619	2.46264e-18
XM_020817200.2	60S ribosomal protein L3, transcript variant X1	XR_002303327.2	cca-miR396c	10	0.47619	2.46264e-18
XM_020817200.2	60S ribosomal protein L3, transcript variant X1	XR_002303327.2	csi-miR396a-3p	10	0.47619	2.46264e-18
XM_020817200.2	60S ribosomal protein L3, transcript variant X1	XR_003702199.1	csi-miR396a-3p	3	0.0789474	0.0002931
XM_020817200.2	60S ribosomal protein L3, transcript variant X1	XR_003702200.1	csi-miR396a-3p	3	0.0833333	0.0002931
XM_020817200.2	60S ribosomal protein L3, transcript variant X1	XR_003702334.1	cca-miR396a-3p	4	0.210526	1.1261e-05
XM_020817200.2	60S ribosomal protein L3, transcript variant X1	XR_003702334.1	cca-miR396c	4	0.210526	1.1261e-05
XM_020817200.2	60S ribosomal protein L3, transcript variant X1	XR_003702334.1	csi-miR396a-3p	4	0.210526	1.1261e-05
XM_020817200.2	60S ribosomal protein L3, transcript variant X1	XR_003703248.1	cca-miR396a-3p	3	0.6	0.0002931
XM_020817210.2	receptor protein-tyrosine kinase CEPR2, transcript variant X2	TCONS_00010017	gma-miR390b-5p	4	1	1.1261e-05
XM_020817210.2	receptor protein-tyrosine kinase CEPR2, transcript variant X2	TCONS_00015787	gma-miR390b-5p	3	1	0.0002931
XM_020817210.2	receptor protein-tyrosine kinase CEPR2, transcript variant X2	XR_003700794.1	gma-miR390b-5p	3	0.230769	0.0002931
XM_020817306.2	histone-lysine N-methyltransferase SUVR5, transcript variant X2	XR_002303972.2	NW_021390876.1_12379	3	0.157895	0.0113263
XM_020817306.2	histone-lysine N-methyltransferase SUVR5, transcript variant X2	XR_003699719.1	NW_021390876.1_12379	3	0.103448	0.0113263
XM_020817306.2	histone-lysine N-methyltransferase SUVR5, transcript variant X2	XR_003700684.1	NW_021390876.1_12379	5	0.238095	0.000134663
XM_020817306.2	histone-lysine N-methyltransferase SUVR5, transcript variant X2	XR_003701266.1	NW_021390876.1_12379	4	0.5	0.00144258
XM_020817306.2	histone-lysine N-methyltransferase SUVR5, transcript variant X2	XR_003701267.1	NW_021390876.1_12379	4	0.5	0.00144258
XM_020817306.2	histone-lysine N-methyltransferase SUVR5, transcript variant X2	XR_003701268.1	NW_021390876.1_12379	4	0.5	0.00144258
XM_020817306.2	histone-lysine N-methyltransferase SUVR5, transcript variant X2	XR_003701269.1	NW_021390876.1_12379	3	0.6	0.0113263
XM_020817306.2	histone-lysine N-methyltransferase SUVR5, transcript variant X2	XR_003701328.1	NW_021390876.1_12379	5	0.0746269	0.000134663
XM_020817306.2	histone-lysine N-methyltransferase SUVR5, transcript variant X2	XR_003701390.1	NW_021390876.1_12379	4	0.108108	0.00144258
XM_020817306.2	histone-lysine N-methyltransferase SUVR5, transcript variant X2	XR_003701602.1	NW_021390876.1_12379	3	0.2	0.0113263
XM_020817306.2	histone-lysine N-methyltransferase SUVR5, transcript variant X2	XR_003703327.1	NW_021390876.1_12379	4	0.235294	0.00144258
XM_020817447.2	C-factor	TCONS_00000010	ahy-miR156c	4	0.4	2.37436e-08
XM_020817447.2	C-factor	TCONS_00005541	ahy-miR156c	4	1	2.37436e-08
XM_020817447.2	C-factor	TCONS_00033747	ahy-miR156c	3	0.1875	3.17353e-06
XM_020817447.2	C-factor	TCONS_00034483	ahy-miR156c	4	0.285714	2.37436e-08
XM_020817447.2	C-factor	TCONS_00036429	ahy-miR156c	4	0.285714	2.37436e-08
XM_020817447.2	C-factor	XR_002304893.2	aof-miR535	4	0.571429	2.37436e-08
XM_020817447.2	C-factor	XR_002304893.2	aqc-miR535	4	0.571429	2.37436e-08
XM_020817447.2	C-factor	XR_002304893.2	mes-miR535a	4	0.571429	2.37436e-08
XM_020817447.2	C-factor	XR_002304893.2	mes-miR535b	4	0.571429	2.37436e-08
XM_020817447.2	C-factor	XR_003699864.1	ahy-miR156c	4	0.666667	2.37436e-08
XM_020817447.2	C-factor	XR_003701135.1	ahy-miR156c	4	0.4	2.37436e-08
XM_020817447.2	C-factor	XR_003701838.1	aof-miR535	4	0.8	2.37436e-08
XM_020817447.2	C-factor	XR_003701838.1	aqc-miR535	4	0.8	2.37436e-08
XM_020817447.2	C-factor	XR_003701838.1	mes-miR535a	4	0.8	2.37436e-08
XM_020817447.2	C-factor	XR_003702767.1	aof-miR535	4	0.111111	2.37436e-08
XM_020817447.2	C-factor	XR_003702767.1	aqc-miR535	4	0.111111	2.37436e-08
XM_020817447.2	C-factor	XR_003702767.1	mes-miR535a	4	0.111111	2.37436e-08
XM_020817447.2	C-factor	XR_003702767.1	mes-miR535b	4	0.111111	2.37436e-08
XM_020817506.2	alpha-1,4 glucan phosphorylase L isozyme, chloroplastic/amyloplastic, transcript variant X2	TCONS_00032841	aly-miR159c-3p	15	0.555556	3.27852e-10
XM_020817506.2	alpha-1,4 glucan phosphorylase L isozyme, chloroplastic/amyloplastic, transcript variant X2	TCONS_00032841	bdi-miR159a-3p	15	0.555556	3.27852e-10
XM_020817506.2	alpha-1,4 glucan phosphorylase L isozyme, chloroplastic/amyloplastic, transcript variant X2	TCONS_00032841	bdi-miR159b-3p.1	15	0.555556	3.27852e-10
XM_020817506.2	alpha-1,4 glucan phosphorylase L isozyme, chloroplastic/amyloplastic, transcript variant X2	TCONS_00032841	cme-miR159b	15	0.555556	3.27852e-10
XM_020817506.2	alpha-1,4 glucan phosphorylase L isozyme, chloroplastic/amyloplastic, transcript variant X2	TCONS_00032841	cpa-miR159b	15	0.555556	3.27852e-10
XM_020817506.2	alpha-1,4 glucan phosphorylase L isozyme, chloroplastic/amyloplastic, transcript variant X2	TCONS_00032841	fve-miR159c	15	0.555556	3.27852e-10
XM_020817506.2	alpha-1,4 glucan phosphorylase L isozyme, chloroplastic/amyloplastic, transcript variant X2	TCONS_00032841	osa-miR159d	15	0.555556	3.27852e-10
XM_020817506.2	alpha-1,4 glucan phosphorylase L isozyme, chloroplastic/amyloplastic, transcript variant X2	TCONS_00032841	osa-miR159f	15	0.555556	3.27852e-10
XM_020817506.2	alpha-1,4 glucan phosphorylase L isozyme, chloroplastic/amyloplastic, transcript variant X2	TCONS_00032841	pta-miR159a	15	0.555556	3.27852e-10
XM_020817506.2	alpha-1,4 glucan phosphorylase L isozyme, chloroplastic/amyloplastic, transcript variant X2	TCONS_00032841	pta-miR159c	15	0.555556	3.27852e-10
XM_020817506.2	alpha-1,4 glucan phosphorylase L isozyme, chloroplastic/amyloplastic, transcript variant X2	TCONS_00032841	ptc-miR159d	15	0.555556	3.27852e-10
XM_020817506.2	alpha-1,4 glucan phosphorylase L isozyme, chloroplastic/amyloplastic, transcript variant X2	TCONS_00032842	aly-miR159c-3p	15	0.483871	3.27852e-10
XM_020817506.2	alpha-1,4 glucan phosphorylase L isozyme, chloroplastic/amyloplastic, transcript variant X2	TCONS_00032842	bdi-miR159a-3p	15	0.483871	3.27852e-10
XM_020817506.2	alpha-1,4 glucan phosphorylase L isozyme, chloroplastic/amyloplastic, transcript variant X2	TCONS_00032842	bdi-miR159b-3p.1	15	0.483871	3.27852e-10
XM_020817506.2	alpha-1,4 glucan phosphorylase L isozyme, chloroplastic/amyloplastic, transcript variant X2	TCONS_00032842	cme-miR159b	15	0.483871	3.27852e-10
XM_020817506.2	alpha-1,4 glucan phosphorylase L isozyme, chloroplastic/amyloplastic, transcript variant X2	TCONS_00032842	cpa-miR159b	15	0.483871	3.27852e-10
XM_020817506.2	alpha-1,4 glucan phosphorylase L isozyme, chloroplastic/amyloplastic, transcript variant X2	TCONS_00032842	fve-miR159c	15	0.483871	3.27852e-10
XM_020817506.2	alpha-1,4 glucan phosphorylase L isozyme, chloroplastic/amyloplastic, transcript variant X2	TCONS_00032842	osa-miR159d	15	0.483871	3.27852e-10
XM_020817506.2	alpha-1,4 glucan phosphorylase L isozyme, chloroplastic/amyloplastic, transcript variant X2	TCONS_00032842	osa-miR159f	15	0.483871	3.27852e-10
XM_020817506.2	alpha-1,4 glucan phosphorylase L isozyme, chloroplastic/amyloplastic, transcript variant X2	TCONS_00032842	pta-miR159a	15	0.483871	3.27852e-10
XM_020817506.2	alpha-1,4 glucan phosphorylase L isozyme, chloroplastic/amyloplastic, transcript variant X2	TCONS_00032842	pta-miR159c	15	0.483871	3.27852e-10
XM_020817506.2	alpha-1,4 glucan phosphorylase L isozyme, chloroplastic/amyloplastic, transcript variant X2	TCONS_00032842	ptc-miR159d	15	0.483871	3.27852e-10
XM_020817506.2	alpha-1,4 glucan phosphorylase L isozyme, chloroplastic/amyloplastic, transcript variant X2	TCONS_00037662	cme-miR159b	7	0.5	0.00539726
XM_020817506.2	alpha-1,4 glucan phosphorylase L isozyme, chloroplastic/amyloplastic, transcript variant X2	TCONS_00037662	fve-miR159c	7	0.5	0.00539726
XM_020817506.2	alpha-1,4 glucan phosphorylase L isozyme, chloroplastic/amyloplastic, transcript variant X2	TCONS_00037662	osa-miR159c	7	0.5	0.00539726
XM_020817506.2	alpha-1,4 glucan phosphorylase L isozyme, chloroplastic/amyloplastic, transcript variant X2	TCONS_00037662	osa-miR159d	7	0.5	0.00539726
XM_020817506.2	alpha-1,4 glucan phosphorylase L isozyme, chloroplastic/amyloplastic, transcript variant X2	TCONS_00037662	pta-miR159a	7	0.5	0.00539726
XM_020817506.2	alpha-1,4 glucan phosphorylase L isozyme, chloroplastic/amyloplastic, transcript variant X2	XR_003701426.1	aly-miR159c-3p	6	0.214286	0.0202799
XM_020817506.2	alpha-1,4 glucan phosphorylase L isozyme, chloroplastic/amyloplastic, transcript variant X2	XR_003701426.1	bdi-miR159b-3p.1	6	0.214286	0.0202799
XM_020817506.2	alpha-1,4 glucan phosphorylase L isozyme, chloroplastic/amyloplastic, transcript variant X2	XR_003701426.1	cpa-miR319	6	0.214286	0.0202799
XM_020817506.2	alpha-1,4 glucan phosphorylase L isozyme, chloroplastic/amyloplastic, transcript variant X2	XR_003702767.1	cme-miR159b	6	0.166667	0.0202799
XM_020817506.2	alpha-1,4 glucan phosphorylase L isozyme, chloroplastic/amyloplastic, transcript variant X2	XR_003702767.1	cpa-miR319	6	0.166667	0.0202799
XM_020817506.2	alpha-1,4 glucan phosphorylase L isozyme, chloroplastic/amyloplastic, transcript variant X2	XR_003702767.1	fve-miR159c	6	0.166667	0.0202799
XM_020817506.2	alpha-1,4 glucan phosphorylase L isozyme, chloroplastic/amyloplastic, transcript variant X2	XR_003702767.1	osa-miR159c	6	0.166667	0.0202799
XM_020817506.2	alpha-1,4 glucan phosphorylase L isozyme, chloroplastic/amyloplastic, transcript variant X2	XR_003702767.1	osa-miR159d	6	0.166667	0.0202799
XM_020818099.2	nitrate regulatory gene2 protein, transcript variant X1	TCONS_00010760	aau-miR396	9	0.75	1.27164e-15
XM_020818099.2	nitrate regulatory gene2 protein, transcript variant X1	TCONS_00010760	aly-miR396b-5p	9	0.75	1.27164e-15
XM_020818099.2	nitrate regulatory gene2 protein, transcript variant X1	TCONS_00010760	gma-miR396e	9	0.75	1.27164e-15
XM_020818099.2	nitrate regulatory gene2 protein, transcript variant X1	TCONS_00010760	mdm-miR396a	9	0.75	1.27164e-15
XM_020818099.2	nitrate regulatory gene2 protein, transcript variant X1	TCONS_00010760	NW_021318846.1_2647_star	9	0.75	1.27164e-15
XM_020818099.2	nitrate regulatory gene2 protein, transcript variant X1	TCONS_00010760	pab-miR396a-5p	9	0.75	1.27164e-15
XM_020818099.2	nitrate regulatory gene2 protein, transcript variant X1	TCONS_00010760	ppe-miR396a	9	0.75	1.27164e-15
XM_020818099.2	nitrate regulatory gene2 protein, transcript variant X1	TCONS_00010760	vca-miR396-5p	9	0.75	1.27164e-15
XM_020818099.2	nitrate regulatory gene2 protein, transcript variant X1	XR_003700291.1	aau-miR396	9	0.333333	1.27164e-15
XM_020818099.2	nitrate regulatory gene2 protein, transcript variant X1	XR_003700291.1	aly-miR396b-5p	9	0.333333	1.27164e-15
XM_020818099.2	nitrate regulatory gene2 protein, transcript variant X1	XR_003700291.1	gma-miR396e	9	0.333333	1.27164e-15
XM_020818099.2	nitrate regulatory gene2 protein, transcript variant X1	XR_003700291.1	mdm-miR396a	9	0.333333	1.27164e-15
XM_020818099.2	nitrate regulatory gene2 protein, transcript variant X1	XR_003700291.1	NW_021318846.1_2647_star	9	0.333333	1.27164e-15
XM_020818099.2	nitrate regulatory gene2 protein, transcript variant X1	XR_003700291.1	pab-miR396a-5p	9	0.333333	1.27164e-15
XM_020818099.2	nitrate regulatory gene2 protein, transcript variant X1	XR_003700291.1	vca-miR396-5p	9	0.333333	1.27164e-15
XM_020818099.2	nitrate regulatory gene2 protein, transcript variant X1	XR_003701085.1	aau-miR396	9	0.692308	1.27164e-15
XM_020818099.2	nitrate regulatory gene2 protein, transcript variant X1	XR_003701085.1	aly-miR396b-5p	9	0.692308	1.27164e-15
XM_020818099.2	nitrate regulatory gene2 protein, transcript variant X1	XR_003701085.1	gma-miR396e	9	0.692308	1.27164e-15
XM_020818099.2	nitrate regulatory gene2 protein, transcript variant X1	XR_003701085.1	mdm-miR396a	9	0.692308	1.27164e-15
XM_020818099.2	nitrate regulatory gene2 protein, transcript variant X1	XR_003701085.1	NW_021318846.1_2647_star	9	0.692308	1.27164e-15
XM_020818099.2	nitrate regulatory gene2 protein, transcript variant X1	XR_003701085.1	pab-miR396a-5p	9	0.692308	1.27164e-15
XM_020818099.2	nitrate regulatory gene2 protein, transcript variant X1	XR_003701085.1	ppe-miR396a	9	0.692308	1.27164e-15
XM_020818099.2	nitrate regulatory gene2 protein, transcript variant X1	XR_003701085.1	vca-miR396-5p	9	0.692308	1.27164e-15
XM_020818099.2	nitrate regulatory gene2 protein, transcript variant X1	XR_003701912.1	aau-miR396	9	0.529412	1.27164e-15
XM_020818099.2	nitrate regulatory gene2 protein, transcript variant X1	XR_003701912.1	aly-miR396b-5p	9	0.529412	1.27164e-15
XM_020818099.2	nitrate regulatory gene2 protein, transcript variant X1	XR_003701912.1	gma-miR396e	9	0.529412	1.27164e-15
XM_020818099.2	nitrate regulatory gene2 protein, transcript variant X1	XR_003701912.1	mdm-miR396a	9	0.529412	1.27164e-15
XM_020818099.2	nitrate regulatory gene2 protein, transcript variant X1	XR_003701912.1	NW_021318846.1_2647_star	9	0.529412	1.27164e-15
XM_020818099.2	nitrate regulatory gene2 protein, transcript variant X1	XR_003701912.1	pab-miR396a-5p	9	0.529412	1.27164e-15
XM_020818099.2	nitrate regulatory gene2 protein, transcript variant X1	XR_003701912.1	ppe-miR396a	9	0.529412	1.27164e-15
XM_020818099.2	nitrate regulatory gene2 protein, transcript variant X1	XR_003701912.1	vca-miR396-5p	9	0.529412	1.27164e-15
XM_020818099.2	nitrate regulatory gene2 protein, transcript variant X1	XR_003702242.1	aau-miR396	8	0.444444	3.35224e-13
XM_020818099.2	nitrate regulatory gene2 protein, transcript variant X1	XR_003702242.1	aly-miR396b-5p	8	0.444444	3.35224e-13
XM_020818099.2	nitrate regulatory gene2 protein, transcript variant X1	XR_003702242.1	gma-miR396e	8	0.444444	3.35224e-13
XM_020818099.2	nitrate regulatory gene2 protein, transcript variant X1	XR_003702242.1	mdm-miR396a	8	0.444444	3.35224e-13
XM_020818099.2	nitrate regulatory gene2 protein, transcript variant X1	XR_003702242.1	NW_021318846.1_2647_star	8	0.444444	3.35224e-13
XM_020818099.2	nitrate regulatory gene2 protein, transcript variant X1	XR_003702242.1	pab-miR396a-5p	8	0.444444	3.35224e-13
XM_020818099.2	nitrate regulatory gene2 protein, transcript variant X1	XR_003702242.1	ppe-miR396a	8	0.444444	3.35224e-13
XM_020818099.2	nitrate regulatory gene2 protein, transcript variant X1	XR_003702242.1	vca-miR396-5p	8	0.444444	3.35224e-13
XM_020818107.2	uncharacterized LOC110093270	XR_003700993.1	ata-miR399b-3p	4	0.8	4.66047e-07
XM_020818252.2	probable receptor-like protein kinase At1g80640	TCONS_00005590	aly-miR159c-3p	6	0.545455	0.00524207
XM_020818252.2	probable receptor-like protein kinase At1g80640	TCONS_00017086	cme-miR159b	10	0.588235	2.52692e-06
XM_020818252.2	probable receptor-like protein kinase At1g80640	TCONS_00017086	cpa-miR159b	10	0.588235	2.52692e-06
XM_020818252.2	probable receptor-like protein kinase At1g80640	TCONS_00017086	fve-miR159c	10	0.588235	2.52692e-06
XM_020818252.2	probable receptor-like protein kinase At1g80640	TCONS_00017086	osa-miR159c	10	0.588235	2.52692e-06
XM_020818252.2	probable receptor-like protein kinase At1g80640	TCONS_00017086	osa-miR159d	10	0.588235	2.52692e-06
XM_020818252.2	probable receptor-like protein kinase At1g80640	TCONS_00017086	pta-miR159c	10	0.588235	2.52692e-06
XM_020818252.2	probable receptor-like protein kinase At1g80640	TCONS_00017086	ptc-miR159d	10	0.588235	2.52692e-06
XM_020818252.2	probable receptor-like protein kinase At1g80640	TCONS_00031314	aly-miR159c-3p	8	0.421053	0.000167188
XM_020818252.2	probable receptor-like protein kinase At1g80640	TCONS_00031314	bdi-miR319b-3p	8	0.421053	0.000167188
XM_020818252.2	probable receptor-like protein kinase At1g80640	TCONS_00031314	ptc-miR319i	8	0.421053	0.000167188
XM_020818252.2	probable receptor-like protein kinase At1g80640	TCONS_00032841	aly-miR159c-3p	10	0.37037	2.52692e-06
XM_020818252.2	probable receptor-like protein kinase At1g80640	TCONS_00032841	cme-miR159b	10	0.37037	2.52692e-06
XM_020818252.2	probable receptor-like protein kinase At1g80640	TCONS_00032841	cpa-miR159b	10	0.37037	2.52692e-06
XM_020818252.2	probable receptor-like protein kinase At1g80640	TCONS_00032841	fve-miR159c	10	0.37037	2.52692e-06
XM_020818252.2	probable receptor-like protein kinase At1g80640	TCONS_00032841	osa-miR159d	10	0.37037	2.52692e-06
XM_020818252.2	probable receptor-like protein kinase At1g80640	TCONS_00032841	pta-miR159a	10	0.37037	2.52692e-06
XM_020818252.2	probable receptor-like protein kinase At1g80640	TCONS_00032841	pta-miR159c	10	0.37037	2.52692e-06
XM_020818252.2	probable receptor-like protein kinase At1g80640	TCONS_00032841	ptc-miR159d	10	0.37037	2.52692e-06
XM_020818252.2	probable receptor-like protein kinase At1g80640	TCONS_00032842	aly-miR159c-3p	10	0.322581	2.52692e-06
XM_020818252.2	probable receptor-like protein kinase At1g80640	TCONS_00032842	cme-miR159b	10	0.322581	2.52692e-06
XM_020818252.2	probable receptor-like protein kinase At1g80640	TCONS_00032842	cpa-miR159b	10	0.322581	2.52692e-06
XM_020818252.2	probable receptor-like protein kinase At1g80640	TCONS_00032842	fve-miR159c	10	0.322581	2.52692e-06
XM_020818252.2	probable receptor-like protein kinase At1g80640	TCONS_00032842	osa-miR159d	10	0.322581	2.52692e-06
XM_020818252.2	probable receptor-like protein kinase At1g80640	TCONS_00032842	pta-miR159a	10	0.322581	2.52692e-06
XM_020818252.2	probable receptor-like protein kinase At1g80640	TCONS_00032842	pta-miR159c	10	0.322581	2.52692e-06
XM_020818252.2	probable receptor-like protein kinase At1g80640	TCONS_00032842	ptc-miR159d	10	0.322581	2.52692e-06
XM_020818252.2	probable receptor-like protein kinase At1g80640	TCONS_00037662	cme-miR159b	6	0.428571	0.00524207
XM_020818252.2	probable receptor-like protein kinase At1g80640	TCONS_00037662	fve-miR159c	6	0.428571	0.00524207
XM_020818252.2	probable receptor-like protein kinase At1g80640	TCONS_00037662	osa-miR159c	6	0.428571	0.00524207
XM_020818252.2	probable receptor-like protein kinase At1g80640	TCONS_00037662	osa-miR159d	6	0.428571	0.00524207
XM_020818252.2	probable receptor-like protein kinase At1g80640	TCONS_00037662	pta-miR159a	6	0.428571	0.00524207
XM_020818252.2	probable receptor-like protein kinase At1g80640	XR_002305298.2	bdi-miR319b-3p	11	0.647059	2.37214e-07
XM_020818252.2	probable receptor-like protein kinase At1g80640	XR_002305298.2	cpa-miR159b	11	0.647059	2.37214e-07
XM_020818252.2	probable receptor-like protein kinase At1g80640	XR_002305298.2	csi-miR159c-3p	11	0.647059	2.37214e-07
XM_020818252.2	probable receptor-like protein kinase At1g80640	XR_002305298.2	mes-miR319h	11	0.647059	2.37214e-07
XM_020818252.2	probable receptor-like protein kinase At1g80640	XR_002305298.2	ppt-miR319a	11	0.647059	2.37214e-07
XM_020818252.2	probable receptor-like protein kinase At1g80640	XR_002305298.2	pta-miR159c	11	0.647059	2.37214e-07
XM_020818252.2	probable receptor-like protein kinase At1g80640	XR_002305298.2	ptc-miR159d	11	0.647059	2.37214e-07
XM_020818252.2	probable receptor-like protein kinase At1g80640	XR_003701426.1	aau-miR319	18	0.642857	9.96096e-17
XM_020818252.2	probable receptor-like protein kinase At1g80640	XR_003701426.1	aly-miR159c-3p	18	0.642857	9.96096e-17
XM_020818252.2	probable receptor-like protein kinase At1g80640	XR_003701426.1	aly-miR319c-3p	18	0.642857	9.96096e-17
XM_020818252.2	probable receptor-like protein kinase At1g80640	XR_003701426.1	atr-miR319a	18	0.642857	9.96096e-17
XM_020818252.2	probable receptor-like protein kinase At1g80640	XR_003701426.1	bdi-miR319b-3p	18	0.642857	9.96096e-17
XM_020818252.2	probable receptor-like protein kinase At1g80640	XR_003701426.1	cme-miR319c	18	0.642857	9.96096e-17
XM_020818252.2	probable receptor-like protein kinase At1g80640	XR_003701426.1	cpa-miR319	18	0.642857	9.96096e-17
XM_020818252.2	probable receptor-like protein kinase At1g80640	XR_003701426.1	csi-miR159c-3p	18	0.642857	9.96096e-17
XM_020818252.2	probable receptor-like protein kinase At1g80640	XR_003701426.1	gma-miR319g	18	0.642857	9.96096e-17
XM_020818252.2	probable receptor-like protein kinase At1g80640	XR_003701426.1	mes-miR319h	18	0.642857	9.96096e-17
XM_020818252.2	probable receptor-like protein kinase At1g80640	XR_003701426.1	mtr-miR319c-3p	18	0.642857	9.96096e-17
XM_020818252.2	probable receptor-like protein kinase At1g80640	XR_003701426.1	ppt-miR319a	18	0.642857	9.96096e-17
XM_020818252.2	probable receptor-like protein kinase At1g80640	XR_003701426.1	pta-miR319	18	0.642857	9.96096e-17
XM_020818252.2	probable receptor-like protein kinase At1g80640	XR_003702767.1	cme-miR159b	6	0.166667	0.00524207
XM_020818252.2	probable receptor-like protein kinase At1g80640	XR_003702767.1	cpa-miR319	6	0.166667	0.00524207
XM_020818252.2	probable receptor-like protein kinase At1g80640	XR_003702767.1	fve-miR159c	6	0.166667	0.00524207
XM_020818252.2	probable receptor-like protein kinase At1g80640	XR_003702767.1	osa-miR159c	6	0.166667	0.00524207
XM_020818252.2	probable receptor-like protein kinase At1g80640	XR_003702767.1	osa-miR159d	6	0.166667	0.00524207
XM_020818482.2	2,3-dimethylmalate lyase-like	TCONS_00010551	aof-miR395a	3	0.75	2.75137e-05
XM_020818482.2	2,3-dimethylmalate lyase-like	TCONS_00010551	osa-miR395b	3	0.75	2.75137e-05
XM_020818482.2	2,3-dimethylmalate lyase-like	TCONS_00023668	aof-miR395a	4	0.666667	4.66047e-07
XM_020818482.2	2,3-dimethylmalate lyase-like	TCONS_00023668	ata-miR395e-3p	4	0.666667	4.66047e-07
XM_020818482.2	2,3-dimethylmalate lyase-like	TCONS_00023668	eun-miR395-3p	4	0.666667	4.66047e-07
XM_020818482.2	2,3-dimethylmalate lyase-like	TCONS_00024832	aly-miR395d-3p	7	0.583333	6.49338e-14
XM_020818482.2	2,3-dimethylmalate lyase-like	TCONS_00024832	ata-miR395e-3p	7	0.583333	6.49338e-14
XM_020818482.2	2,3-dimethylmalate lyase-like	TCONS_00024832	eun-miR395-3p	7	0.583333	6.49338e-14
XM_020818482.2	2,3-dimethylmalate lyase-like	TCONS_00025990	aly-miR395d-3p	7	0.583333	6.49338e-14
XM_020818482.2	2,3-dimethylmalate lyase-like	TCONS_00025990	aof-miR395a	7	0.583333	6.49338e-14
XM_020818482.2	2,3-dimethylmalate lyase-like	TCONS_00025990	ata-miR395e-3p	7	0.583333	6.49338e-14
XM_020818482.2	2,3-dimethylmalate lyase-like	TCONS_00025990	eun-miR395-3p	7	0.583333	6.49338e-14
XM_020818482.2	2,3-dimethylmalate lyase-like	TCONS_00025990	mdm-miR395l	7	0.583333	6.49338e-14
XM_020818482.2	2,3-dimethylmalate lyase-like	TCONS_00025990	osa-miR395b	7	0.583333	6.49338e-14
XM_020818482.2	2,3-dimethylmalate lyase-like	TCONS_00032470	aly-miR395d-3p	4	0.4	4.66047e-07
XM_020818482.2	2,3-dimethylmalate lyase-like	TCONS_00032470	aof-miR395a	4	0.4	4.66047e-07
XM_020818482.2	2,3-dimethylmalate lyase-like	TCONS_00032470	ata-miR395e-3p	4	0.4	4.66047e-07
XM_020818482.2	2,3-dimethylmalate lyase-like	XR_003701379.1	aly-miR395d-3p	5	0.357143	4.57024e-09
XM_020818482.2	2,3-dimethylmalate lyase-like	XR_003701379.1	eun-miR395-3p	5	0.357143	4.57024e-09
XM_020818482.2	2,3-dimethylmalate lyase-like	XR_003701379.1	mdm-miR395l	5	0.357143	4.57024e-09
XM_020818482.2	2,3-dimethylmalate lyase-like	XR_003701379.1	osa-miR395b	5	0.357143	4.57024e-09
XM_020818482.2	2,3-dimethylmalate lyase-like	XR_003701381.1	aly-miR395d-3p	5	0.357143	4.57024e-09
XM_020818482.2	2,3-dimethylmalate lyase-like	XR_003701381.1	eun-miR395-3p	5	0.357143	4.57024e-09
XM_020818482.2	2,3-dimethylmalate lyase-like	XR_003701381.1	mdm-miR395l	5	0.357143	4.57024e-09
XM_020818482.2	2,3-dimethylmalate lyase-like	XR_003701381.1	osa-miR395b	5	0.357143	4.57024e-09
XM_020818486.2	uncharacterized LOC110093562, transcript variant X7	TCONS_00033747	ahy-miR156b-5p	4	0.25	7.70454e-12
XM_020818486.2	uncharacterized LOC110093562, transcript variant X7	TCONS_00033747	bcy-miR156	4	0.25	7.70454e-12
XM_020818821.2	derlin-1.1, transcript variant X2	TCONS_00032841	aly-miR156a-5p	4	0.148148	3.37151e-09
XM_020818821.2	derlin-1.1, transcript variant X2	TCONS_00032842	aly-miR156a-5p	4	0.129032	3.37151e-09
XM_020818821.2	derlin-1.1, transcript variant X2	TCONS_00032842	sbi-miR156e	4	0.129032	3.37151e-09
XM_020818821.2	derlin-1.1, transcript variant X2	XR_002303219.2	aly-miR156a-5p	4	0.105263	3.37151e-09
XM_020818821.2	derlin-1.1, transcript variant X2	XR_002303219.2	sbi-miR156e	4	0.105263	3.37151e-09
XM_020818821.2	derlin-1.1, transcript variant X2	XR_003701652.1	aly-miR156a-5p	3	0.157895	8.03797e-07
XM_020818821.2	derlin-1.1, transcript variant X2	XR_003702334.1	aly-miR156a-5p	3	0.157895	8.03797e-07
XM_020818823.2	derlin-1.1, transcript variant X4	TCONS_00032841	aly-miR156a-5p	4	0.148148	3.37151e-09
XM_020818823.2	derlin-1.1, transcript variant X4	TCONS_00032842	aly-miR156a-5p	4	0.129032	3.37151e-09
XM_020818823.2	derlin-1.1, transcript variant X4	TCONS_00032842	sbi-miR156e	4	0.129032	3.37151e-09
XM_020818823.2	derlin-1.1, transcript variant X4	XR_002303219.2	aly-miR156a-5p	4	0.105263	3.37151e-09
XM_020818823.2	derlin-1.1, transcript variant X4	XR_002303219.2	sbi-miR156e	4	0.105263	3.37151e-09
XM_020818823.2	derlin-1.1, transcript variant X4	XR_003701652.1	aly-miR156a-5p	3	0.157895	8.03797e-07
XM_020818823.2	derlin-1.1, transcript variant X4	XR_003702334.1	aly-miR156a-5p	3	0.157895	8.03797e-07
XM_020818896.2	putative receptor-like protein kinase At3g47110	XR_003700791.1	aly-miR390a-5p	4	0.571429	5.31123e-08
XM_020819183.2	senescence-associated protein OSA15, chloroplastic, transcript variant X2	TCONS_00004140	aof-miR396a	3	0.142857	0.000145045
XM_020819183.2	senescence-associated protein OSA15, chloroplastic, transcript variant X2	TCONS_00009763	aof-miR396a	3	1	0.000145045
XM_020819183.2	senescence-associated protein OSA15, chloroplastic, transcript variant X2	TCONS_00010760	aau-miR396	11	0.916667	1.1501e-23
XM_020819183.2	senescence-associated protein OSA15, chloroplastic, transcript variant X2	TCONS_00010760	aly-miR396b-5p	11	0.916667	1.1501e-23
XM_020819183.2	senescence-associated protein OSA15, chloroplastic, transcript variant X2	TCONS_00010760	gma-miR396e	11	0.916667	1.1501e-23
XM_020819183.2	senescence-associated protein OSA15, chloroplastic, transcript variant X2	TCONS_00010760	gma-miR396h	11	0.916667	1.1501e-23
XM_020819183.2	senescence-associated protein OSA15, chloroplastic, transcript variant X2	TCONS_00010760	mdm-miR396a	11	0.916667	1.1501e-23
XM_020819183.2	senescence-associated protein OSA15, chloroplastic, transcript variant X2	TCONS_00010760	NW_021318846.1_2647_star	11	0.916667	1.1501e-23
XM_020819183.2	senescence-associated protein OSA15, chloroplastic, transcript variant X2	TCONS_00010760	ppe-miR396a	11	0.916667	1.1501e-23
XM_020819183.2	senescence-associated protein OSA15, chloroplastic, transcript variant X2	TCONS_00010760	vca-miR396-5p	11	0.916667	1.1501e-23
XM_020819183.2	senescence-associated protein OSA15, chloroplastic, transcript variant X2	XR_003700291.1	aau-miR396	11	0.407407	1.1501e-23
XM_020819183.2	senescence-associated protein OSA15, chloroplastic, transcript variant X2	XR_003700291.1	aly-miR396b-5p	11	0.407407	1.1501e-23
XM_020819183.2	senescence-associated protein OSA15, chloroplastic, transcript variant X2	XR_003700291.1	aof-miR396a	11	0.407407	1.1501e-23
XM_020819183.2	senescence-associated protein OSA15, chloroplastic, transcript variant X2	XR_003700291.1	gma-miR396e	11	0.407407	1.1501e-23
XM_020819183.2	senescence-associated protein OSA15, chloroplastic, transcript variant X2	XR_003700291.1	gma-miR396h	11	0.407407	1.1501e-23
XM_020819183.2	senescence-associated protein OSA15, chloroplastic, transcript variant X2	XR_003700291.1	mdm-miR396a	11	0.407407	1.1501e-23
XM_020819183.2	senescence-associated protein OSA15, chloroplastic, transcript variant X2	XR_003700291.1	NW_021318846.1_2647_star	11	0.407407	1.1501e-23
XM_020819183.2	senescence-associated protein OSA15, chloroplastic, transcript variant X2	XR_003700291.1	vca-miR396-5p	11	0.407407	1.1501e-23
XM_020819183.2	senescence-associated protein OSA15, chloroplastic, transcript variant X2	XR_003700468.1	aof-miR396a	4	0.444444	4.39205e-06
XM_020819183.2	senescence-associated protein OSA15, chloroplastic, transcript variant X2	XR_003701085.1	aau-miR396	12	0.923077	0
XM_020819183.2	senescence-associated protein OSA15, chloroplastic, transcript variant X2	XR_003701085.1	aly-miR396b-5p	12	0.923077	0
XM_020819183.2	senescence-associated protein OSA15, chloroplastic, transcript variant X2	XR_003701085.1	aof-miR396a	12	0.923077	0
XM_020819183.2	senescence-associated protein OSA15, chloroplastic, transcript variant X2	XR_003701085.1	gma-miR396e	12	0.923077	0
XM_020819183.2	senescence-associated protein OSA15, chloroplastic, transcript variant X2	XR_003701085.1	gma-miR396h	12	0.923077	0
XM_020819183.2	senescence-associated protein OSA15, chloroplastic, transcript variant X2	XR_003701085.1	mdm-miR396a	12	0.923077	0
XM_020819183.2	senescence-associated protein OSA15, chloroplastic, transcript variant X2	XR_003701085.1	NW_021318846.1_2647_star	12	0.923077	0
XM_020819183.2	senescence-associated protein OSA15, chloroplastic, transcript variant X2	XR_003701085.1	ppe-miR396a	12	0.923077	0
XM_020819183.2	senescence-associated protein OSA15, chloroplastic, transcript variant X2	XR_003701085.1	vca-miR396-5p	12	0.923077	0
XM_020819183.2	senescence-associated protein OSA15, chloroplastic, transcript variant X2	XR_003701912.1	aau-miR396	11	0.647059	1.1501e-23
XM_020819183.2	senescence-associated protein OSA15, chloroplastic, transcript variant X2	XR_003701912.1	aly-miR396b-5p	11	0.647059	1.1501e-23
XM_020819183.2	senescence-associated protein OSA15, chloroplastic, transcript variant X2	XR_003701912.1	aof-miR396a	11	0.647059	1.1501e-23
XM_020819183.2	senescence-associated protein OSA15, chloroplastic, transcript variant X2	XR_003701912.1	gma-miR396e	11	0.647059	1.1501e-23
XM_020819183.2	senescence-associated protein OSA15, chloroplastic, transcript variant X2	XR_003701912.1	gma-miR396h	11	0.647059	1.1501e-23
XM_020819183.2	senescence-associated protein OSA15, chloroplastic, transcript variant X2	XR_003701912.1	mdm-miR396a	11	0.647059	1.1501e-23
XM_020819183.2	senescence-associated protein OSA15, chloroplastic, transcript variant X2	XR_003701912.1	NW_021318846.1_2647_star	11	0.647059	1.1501e-23
XM_020819183.2	senescence-associated protein OSA15, chloroplastic, transcript variant X2	XR_003701912.1	ppe-miR396a	11	0.647059	1.1501e-23
XM_020819183.2	senescence-associated protein OSA15, chloroplastic, transcript variant X2	XR_003701912.1	vca-miR396-5p	11	0.647059	1.1501e-23
XM_020819183.2	senescence-associated protein OSA15, chloroplastic, transcript variant X2	XR_003702203.1	aof-miR396a	3	0.75	0.000145045
XM_020819183.2	senescence-associated protein OSA15, chloroplastic, transcript variant X2	XR_003702242.1	aau-miR396	8	0.444444	3.22125e-14
XM_020819183.2	senescence-associated protein OSA15, chloroplastic, transcript variant X2	XR_003702242.1	aly-miR396b-5p	8	0.444444	3.22125e-14
XM_020819183.2	senescence-associated protein OSA15, chloroplastic, transcript variant X2	XR_003702242.1	gma-miR396e	8	0.444444	3.22125e-14
XM_020819183.2	senescence-associated protein OSA15, chloroplastic, transcript variant X2	XR_003702242.1	gma-miR396h	8	0.444444	3.22125e-14
XM_020819183.2	senescence-associated protein OSA15, chloroplastic, transcript variant X2	XR_003702242.1	mdm-miR396a	8	0.444444	3.22125e-14
XM_020819183.2	senescence-associated protein OSA15, chloroplastic, transcript variant X2	XR_003702242.1	NW_021318846.1_2647_star	8	0.444444	3.22125e-14
XM_020819183.2	senescence-associated protein OSA15, chloroplastic, transcript variant X2	XR_003702242.1	ppe-miR396a	8	0.444444	3.22125e-14
XM_020819183.2	senescence-associated protein OSA15, chloroplastic, transcript variant X2	XR_003702242.1	vca-miR396-5p	8	0.444444	3.22125e-14
XM_020819318.2	uncharacterized LOC110094155, transcript variant X2	XR_003700959.1	aof-miR393b	7	0.411765	4.81319e-06
XM_020819318.2	uncharacterized LOC110094155, transcript variant X2	XR_003700959.1	ata-miR393-5p	7	0.411765	4.81319e-06
XM_020819318.2	uncharacterized LOC110094155, transcript variant X2	XR_003700959.1	bdi-miR393a	7	0.411765	4.81319e-06
XM_020819318.2	uncharacterized LOC110094155, transcript variant X2	XR_003700959.1	csi-miR393a	7	0.411765	4.81319e-06
XM_020819318.2	uncharacterized LOC110094155, transcript variant X2	XR_003700959.1	csi-miR393b-5p	7	0.411765	4.81319e-06
XM_020819318.2	uncharacterized LOC110094155, transcript variant X2	XR_003700960.1	aof-miR393b	7	0.411765	4.81319e-06
XM_020819318.2	uncharacterized LOC110094155, transcript variant X2	XR_003700960.1	ata-miR393-5p	7	0.411765	4.81319e-06
XM_020819318.2	uncharacterized LOC110094155, transcript variant X2	XR_003700960.1	bdi-miR393a	7	0.411765	4.81319e-06
XM_020819318.2	uncharacterized LOC110094155, transcript variant X2	XR_003700960.1	csi-miR393a	7	0.411765	4.81319e-06
XM_020819318.2	uncharacterized LOC110094155, transcript variant X2	XR_003700960.1	csi-miR393b-5p	7	0.411765	4.81319e-06
XM_020819318.2	uncharacterized LOC110094155, transcript variant X2	XR_003701391.1	aof-miR393b	8	0.444444	2.96626e-07
XM_020819318.2	uncharacterized LOC110094155, transcript variant X2	XR_003701391.1	ata-miR393-5p	8	0.444444	2.96626e-07
XM_020819318.2	uncharacterized LOC110094155, transcript variant X2	XR_003701391.1	bdi-miR393a	8	0.444444	2.96626e-07
XM_020819318.2	uncharacterized LOC110094155, transcript variant X2	XR_003701391.1	csi-miR393b-5p	8	0.444444	2.96626e-07
XM_020819346.2	probable trehalase	XR_003702149.1	aau-miR172	7	0.538462	8.6394e-13
XM_020819358.2	bifunctional UDP-glucose 4-epimerase and UDP-xylose 4-epimerase 1, transcript variant X1	TCONS_00000010	bdi-miR156a	3	0.3	0.000145045
XM_020819358.2	bifunctional UDP-glucose 4-epimerase and UDP-xylose 4-epimerase 1, transcript variant X1	TCONS_00000010	ppt-miR529e	3	0.3	0.000145045
XM_020819358.2	bifunctional UDP-glucose 4-epimerase and UDP-xylose 4-epimerase 1, transcript variant X1	TCONS_00036429	bdi-miR156a	3	0.214286	0.000145045
XM_020819358.2	bifunctional UDP-glucose 4-epimerase and UDP-xylose 4-epimerase 1, transcript variant X1	TCONS_00036429	ppt-miR529e	3	0.214286	0.000145045
XM_020819358.2	bifunctional UDP-glucose 4-epimerase and UDP-xylose 4-epimerase 1, transcript variant X1	XR_002303219.2	bdi-miR156a	3	0.0789474	0.000145045
XM_020819358.2	bifunctional UDP-glucose 4-epimerase and UDP-xylose 4-epimerase 1, transcript variant X1	XR_003702767.1	ppt-miR529e	3	0.0833333	0.000145045
XM_020819362.2	uncharacterized LOC110094190	TCONS_00018697	aly-miR167a-5p	11	0.916667	9.44129e-20
XM_020819362.2	uncharacterized LOC110094190	TCONS_00018697	bna-miR167a	11	0.916667	9.44129e-20
XM_020819362.2	uncharacterized LOC110094190	TCONS_00026869	aly-miR167a-5p	13	0.866667	1.16158e-26
XM_020819362.2	uncharacterized LOC110094190	TCONS_00026869	bna-miR167a	13	0.866667	1.16158e-26
XM_020819362.2	uncharacterized LOC110094190	XR_003702199.1	aly-miR167a-5p	12	0.315789	6.88006e-23
XM_020819362.2	uncharacterized LOC110094190	XR_003702199.1	bna-miR167a	12	0.315789	6.88006e-23
XM_020819362.2	uncharacterized LOC110094190	XR_003702200.1	aly-miR167a-5p	12	0.333333	6.88006e-23
XM_020819362.2	uncharacterized LOC110094190	XR_003702200.1	bna-miR167a	12	0.333333	6.88006e-23
XM_020819712.2	probable WRKY transcription factor 53	TCONS_00005590	aly-miR159c-3p	10	0.909091	2.02782e-12
XM_020819712.2	probable WRKY transcription factor 53	TCONS_00005590	bdi-miR159b-3p.1	10	0.909091	2.02782e-12
XM_020819712.2	probable WRKY transcription factor 53	TCONS_00031314	aly-miR159c-3p	10	0.526316	2.02782e-12
XM_020819712.2	probable WRKY transcription factor 53	TCONS_00031314	bdi-miR159b-3p.1	10	0.526316	2.02782e-12
XM_020819712.2	probable WRKY transcription factor 53	TCONS_00031314	gma-miR319p	10	0.526316	2.02782e-12
XM_020819712.2	probable WRKY transcription factor 53	TCONS_00032841	aly-miR159c-3p	8	0.296296	4.67169e-09
XM_020819712.2	probable WRKY transcription factor 53	TCONS_00032841	bdi-miR159a-3p	8	0.296296	4.67169e-09
XM_020819712.2	probable WRKY transcription factor 53	TCONS_00032841	bdi-miR159b-3p.1	8	0.296296	4.67169e-09
XM_020819712.2	probable WRKY transcription factor 53	TCONS_00032841	osa-miR159f	8	0.296296	4.67169e-09
XM_020819712.2	probable WRKY transcription factor 53	TCONS_00032842	aly-miR159c-3p	8	0.258065	4.67169e-09
XM_020819712.2	probable WRKY transcription factor 53	TCONS_00032842	bdi-miR159a-3p	8	0.258065	4.67169e-09
XM_020819712.2	probable WRKY transcription factor 53	TCONS_00032842	bdi-miR159b-3p.1	8	0.258065	4.67169e-09
XM_020819712.2	probable WRKY transcription factor 53	TCONS_00032842	osa-miR159f	8	0.258065	4.67169e-09
XM_020819712.2	probable WRKY transcription factor 53	XR_002303623.2	aly-miR159c-3p	6	0.230769	3.27076e-06
XM_020819712.2	probable WRKY transcription factor 53	XR_002303623.2	bdi-miR159b-3p.1	6	0.230769	3.27076e-06
XM_020819712.2	probable WRKY transcription factor 53	XR_002303625.2	aly-miR159c-3p	6	0.230769	3.27076e-06
XM_020819712.2	probable WRKY transcription factor 53	XR_002303625.2	bdi-miR159b-3p.1	6	0.230769	3.27076e-06
XM_020819712.2	probable WRKY transcription factor 53	XR_002305298.2	bdi-miR159a-3p	7	0.411765	1.43e-07
XM_020819712.2	probable WRKY transcription factor 53	XR_002305298.2	gma-miR319p	7	0.411765	1.43e-07
XM_020819712.2	probable WRKY transcription factor 53	XR_002305298.2	osa-miR159f	7	0.411765	1.43e-07
XM_020819712.2	probable WRKY transcription factor 53	XR_003701426.1	aly-miR159c-3p	11	0.392857	2.6213e-14
XM_020819712.2	probable WRKY transcription factor 53	XR_003701426.1	bdi-miR159b-3p.1	11	0.392857	2.6213e-14
XM_020819712.2	probable WRKY transcription factor 53	XR_003701426.1	cme-miR319c	11	0.392857	2.6213e-14
XM_020819712.2	probable WRKY transcription factor 53	XR_003701426.1	gma-miR319p	11	0.392857	2.6213e-14
XM_020819712.2	probable WRKY transcription factor 53	XR_003701426.1	pta-miR319	11	0.392857	2.6213e-14
XM_020819712.2	probable WRKY transcription factor 53	XR_003702492.1	aly-miR159c-3p	6	0.230769	3.27076e-06
XM_020819712.2	probable WRKY transcription factor 53	XR_003702492.1	bdi-miR159b-3p.1	6	0.230769	3.27076e-06
XM_020819712.2	probable WRKY transcription factor 53	XR_003702493.1	aly-miR159c-3p	6	0.230769	3.27076e-06
XM_020819712.2	probable WRKY transcription factor 53	XR_003702493.1	bdi-miR159b-3p.1	6	0.230769	3.27076e-06
XM_020819738.2	purine permease 3-like	TCONS_00023661	aly-miR395d-3p	6	0.272727	2.23406e-12
XM_020819738.2	purine permease 3-like	TCONS_00023661	sly-miR395a	6	0.272727	2.23406e-12
XM_020819738.2	purine permease 3-like	TCONS_00024832	aly-miR395d-3p	5	0.416667	7.41585e-10
XM_020819738.2	purine permease 3-like	TCONS_00024832	sly-miR395a	5	0.416667	7.41585e-10
XM_020819738.2	purine permease 3-like	TCONS_00025156	aly-miR395d-3p	5	1	7.41585e-10
XM_020819738.2	purine permease 3-like	TCONS_00025156	mdm-miR395l	5	1	7.41585e-10
XM_020819738.2	purine permease 3-like	TCONS_00025156	sly-miR395a	5	1	7.41585e-10
XM_020819738.2	purine permease 3-like	TCONS_00025990	aly-miR395d-3p	5	0.416667	7.41585e-10
XM_020819738.2	purine permease 3-like	TCONS_00025990	mdm-miR395l	5	0.416667	7.41585e-10
XM_020819738.2	purine permease 3-like	TCONS_00025990	sly-miR395a	5	0.416667	7.41585e-10
XM_020819738.2	purine permease 3-like	TCONS_00032470	aly-miR395d-3p	5	0.5	7.41585e-10
XM_020819738.2	purine permease 3-like	TCONS_00032470	sly-miR395a	5	0.5	7.41585e-10
XM_020819738.2	purine permease 3-like	XR_003701379.1	aly-miR395d-3p	7	0.5	2.61361e-15
XM_020819738.2	purine permease 3-like	XR_003701379.1	mdm-miR395l	7	0.5	2.61361e-15
XM_020819738.2	purine permease 3-like	XR_003701379.1	sly-miR395a	7	0.5	2.61361e-15
XM_020819738.2	purine permease 3-like	XR_003701381.1	aly-miR395d-3p	7	0.5	2.61361e-15
XM_020819738.2	purine permease 3-like	XR_003701381.1	mdm-miR395l	7	0.5	2.61361e-15
XM_020819738.2	purine permease 3-like	XR_003701381.1	sly-miR395a	7	0.5	2.61361e-15
XM_020819738.2	purine permease 3-like	XR_003703321.1	aly-miR395d-3p	4	1	1.18576e-07
XM_020819738.2	purine permease 3-like	XR_003703321.1	sly-miR395a	4	1	1.18576e-07
XM_020819816.2	CBS domain-containing protein CBSX5-like	TCONS_00017098	ata-miR172a-3p	3	0.214286	1.66495e-08
XM_020819816.2	CBS domain-containing protein CBSX5-like	TCONS_00017098	csi-miR172a-3p	3	0.214286	1.66495e-08
XM_020819816.2	CBS domain-containing protein CBSX5-like	TCONS_00017098	stu-miR172c-3p	3	0.214286	1.66495e-08
XM_020819816.2	CBS domain-containing protein CBSX5-like	TCONS_00036308	ata-miR172a-3p	3	0.5	1.66495e-08
XM_020819816.2	CBS domain-containing protein CBSX5-like	TCONS_00036308	csi-miR172a-3p	3	0.5	1.66495e-08
XM_020819816.2	CBS domain-containing protein CBSX5-like	TCONS_00036308	stu-miR172c-3p	3	0.5	1.66495e-08
XM_020819816.2	CBS domain-containing protein CBSX5-like	XR_003701114.1	ata-miR172a-3p	3	0.375	1.66495e-08
XM_020819816.2	CBS domain-containing protein CBSX5-like	XR_003701114.1	csi-miR172a-3p	3	0.375	1.66495e-08
XM_020819816.2	CBS domain-containing protein CBSX5-like	XR_003701114.1	stu-miR172c-3p	3	0.375	1.66495e-08
XM_020819889.2	pollen-specific protein C13	XR_002304893.2	aof-miR535	4	0.571429	2.37436e-08
XM_020819889.2	pollen-specific protein C13	XR_002304893.2	aqc-miR535	4	0.571429	2.37436e-08
XM_020819889.2	pollen-specific protein C13	XR_002304893.2	mes-miR535a	4	0.571429	2.37436e-08
XM_020819889.2	pollen-specific protein C13	XR_002304893.2	mes-miR535b	4	0.571429	2.37436e-08
XM_020819889.2	pollen-specific protein C13	XR_003701838.1	aof-miR535	4	0.8	2.37436e-08
XM_020819889.2	pollen-specific protein C13	XR_003701838.1	aqc-miR535	4	0.8	2.37436e-08
XM_020819889.2	pollen-specific protein C13	XR_003701838.1	mes-miR535a	4	0.8	2.37436e-08
XM_020819889.2	pollen-specific protein C13	XR_003702767.1	aof-miR535	6	0.166667	1.11002e-13
XM_020819889.2	pollen-specific protein C13	XR_003702767.1	aqc-miR535	6	0.166667	1.11002e-13
XM_020819889.2	pollen-specific protein C13	XR_003702767.1	mdm-miR535d	6	0.166667	1.11002e-13
XM_020819889.2	pollen-specific protein C13	XR_003702767.1	mes-miR535a	6	0.166667	1.11002e-13
XM_020819889.2	pollen-specific protein C13	XR_003702767.1	mes-miR535b	6	0.166667	1.11002e-13
XM_020819981.2	homeobox protein BEL1 homolog	TCONS_00032841	aly-miR156a-5p	5	0.185185	0.000353248
XM_020819981.2	homeobox protein BEL1 homolog	TCONS_00032841	sly-miR156e-5p	5	0.185185	0.000353248
XM_020819981.2	homeobox protein BEL1 homolog	TCONS_00032842	aly-miR156a-5p	5	0.16129	0.000353248
XM_020819981.2	homeobox protein BEL1 homolog	TCONS_00032842	sbi-miR156e	5	0.16129	0.000353248
XM_020819981.2	homeobox protein BEL1 homolog	TCONS_00032842	sly-miR156e-5p	5	0.16129	0.000353248
XM_020819981.2	homeobox protein BEL1 homolog	XR_002303219.2	aly-miR156a-5p	5	0.131579	0.000353248
XM_020819981.2	homeobox protein BEL1 homolog	XR_002303219.2	sbi-miR156e	5	0.131579	0.000353248
XM_020819981.2	homeobox protein BEL1 homolog	XR_003701652.1	aly-miR156a-5p	5	0.263158	0.000353248
XM_020819981.2	homeobox protein BEL1 homolog	XR_003702334.1	aly-miR156a-5p	3	0.157895	0.0193834
XM_020819981.2	homeobox protein BEL1 homolog	XR_003702767.1	aly-miR156a-5p	4	0.111111	0.0030178
XM_020819981.2	homeobox protein BEL1 homolog	XR_003702767.1	sly-miR156e-5p	4	0.111111	0.0030178
XM_020820080.2	glutamine synthetase nodule isozyme	TCONS_00005590	aly-miR159c-3p	4	0.363636	7.70454e-12
XM_020820080.2	glutamine synthetase nodule isozyme	TCONS_00005590	bdi-miR159b-3p.1	4	0.363636	7.70454e-12
XM_020820080.2	glutamine synthetase nodule isozyme	TCONS_00031314	aly-miR159c-3p	4	0.210526	7.70454e-12
XM_020820080.2	glutamine synthetase nodule isozyme	TCONS_00031314	bdi-miR159b-3p.1	4	0.210526	7.70454e-12
XM_020820080.2	glutamine synthetase nodule isozyme	TCONS_00032841	aly-miR159c-3p	4	0.148148	7.70454e-12
XM_020820080.2	glutamine synthetase nodule isozyme	TCONS_00032841	bdi-miR159b-3p.1	4	0.148148	7.70454e-12
XM_020820080.2	glutamine synthetase nodule isozyme	TCONS_00032842	aly-miR159c-3p	4	0.129032	7.70454e-12
XM_020820080.2	glutamine synthetase nodule isozyme	TCONS_00032842	bdi-miR159b-3p.1	4	0.129032	7.70454e-12
XM_020820080.2	glutamine synthetase nodule isozyme	XR_002303623.2	aly-miR159c-3p	4	0.153846	7.70454e-12
XM_020820080.2	glutamine synthetase nodule isozyme	XR_002303623.2	bdi-miR159b-3p.1	4	0.153846	7.70454e-12
XM_020820080.2	glutamine synthetase nodule isozyme	XR_002303625.2	aly-miR159c-3p	4	0.153846	7.70454e-12
XM_020820080.2	glutamine synthetase nodule isozyme	XR_002303625.2	bdi-miR159b-3p.1	4	0.153846	7.70454e-12
XM_020820080.2	glutamine synthetase nodule isozyme	XR_003701426.1	aly-miR159c-3p	4	0.142857	7.70454e-12
XM_020820080.2	glutamine synthetase nodule isozyme	XR_003701426.1	bdi-miR159b-3p.1	4	0.142857	7.70454e-12
XM_020820080.2	glutamine synthetase nodule isozyme	XR_003702492.1	aly-miR159c-3p	4	0.153846	7.70454e-12
XM_020820080.2	glutamine synthetase nodule isozyme	XR_003702492.1	bdi-miR159b-3p.1	4	0.153846	7.70454e-12
XM_020820080.2	glutamine synthetase nodule isozyme	XR_003702493.1	aly-miR159c-3p	4	0.153846	7.70454e-12
XM_020820080.2	glutamine synthetase nodule isozyme	XR_003702493.1	bdi-miR159b-3p.1	4	0.153846	7.70454e-12
XM_020820193.2	U-box domain-containing protein 44	TCONS_00000010	ahy-miR156c	4	0.4	1.1261e-05
XM_020820193.2	U-box domain-containing protein 44	TCONS_00000010	bdi-miR156a	4	0.4	1.1261e-05
XM_020820193.2	U-box domain-containing protein 44	TCONS_00029329	ahy-miR156c	4	0.5	1.1261e-05
XM_020820193.2	U-box domain-containing protein 44	TCONS_00029329	bdi-miR156a	4	0.5	1.1261e-05
XM_020820193.2	U-box domain-containing protein 44	TCONS_00032841	aly-miR156a-5p	3	0.111111	0.0002931
XM_020820193.2	U-box domain-containing protein 44	TCONS_00032841	gma-miR156q	3	0.111111	0.0002931
XM_020820193.2	U-box domain-containing protein 44	TCONS_00032842	aly-miR156a-5p	3	0.0967742	0.0002931
XM_020820193.2	U-box domain-containing protein 44	TCONS_00032842	gma-miR156q	3	0.0967742	0.0002931
XM_020820193.2	U-box domain-containing protein 44	TCONS_00032842	sbi-miR156e	3	0.0967742	0.0002931
XM_020820193.2	U-box domain-containing protein 44	TCONS_00033747	ahy-miR156c	3	0.1875	0.0002931
XM_020820193.2	U-box domain-containing protein 44	TCONS_00033747	aly-miR157d-5p	3	0.1875	0.0002931
XM_020820193.2	U-box domain-containing protein 44	TCONS_00036429	ahy-miR156c	5	0.357143	2.855e-07
XM_020820193.2	U-box domain-containing protein 44	TCONS_00036429	bdi-miR156a	5	0.357143	2.855e-07
XM_020820193.2	U-box domain-containing protein 44	XR_002303219.2	aly-miR156a-5p	8	0.210526	3.35224e-13
XM_020820193.2	U-box domain-containing protein 44	XR_002303219.2	aly-miR157d-5p	8	0.210526	3.35224e-13
XM_020820193.2	U-box domain-containing protein 44	XR_002303219.2	bdi-miR156a	8	0.210526	3.35224e-13
XM_020820193.2	U-box domain-containing protein 44	XR_002303219.2	gma-miR156q	8	0.210526	3.35224e-13
XM_020820193.2	U-box domain-containing protein 44	XR_002303219.2	sbi-miR156e	8	0.210526	3.35224e-13
XM_020820193.2	U-box domain-containing protein 44	XR_003700116.1	aly-miR157d-5p	4	0.16	1.1261e-05
XM_020820193.2	U-box domain-containing protein 44	XR_003700116.1	bdi-miR156a	4	0.16	1.1261e-05
XM_020820193.2	U-box domain-containing protein 44	XR_003701135.1	ahy-miR156c	5	0.5	2.855e-07
XM_020820193.2	U-box domain-containing protein 44	XR_003701135.1	bdi-miR156a	5	0.5	2.855e-07
XM_020820193.2	U-box domain-containing protein 44	XR_003701652.1	aly-miR156a-5p	4	0.210526	1.1261e-05
XM_020820193.2	U-box domain-containing protein 44	XR_003701652.1	aly-miR157d-5p	4	0.210526	1.1261e-05
XM_020820193.2	U-box domain-containing protein 44	XR_003701652.1	gma-miR156q	4	0.210526	1.1261e-05
XM_020820193.2	U-box domain-containing protein 44	XR_003701652.1	mtr-miR156j	4	0.210526	1.1261e-05
XM_020820193.2	U-box domain-containing protein 44	XR_003702334.1	aly-miR156a-5p	7	0.368421	5.08288e-11
XM_020820193.2	U-box domain-containing protein 44	XR_003702334.1	aly-miR157d-5p	7	0.368421	5.08288e-11
XM_020820193.2	U-box domain-containing protein 44	XR_003702334.1	bdi-miR156a	7	0.368421	5.08288e-11
XM_020820193.2	U-box domain-containing protein 44	XR_003702334.1	gma-miR156q	7	0.368421	5.08288e-11
XM_020820437.2	monosaccharide-sensing protein 2, transcript variant X2	XR_002304478.2	aly-miR396a-3p	3	0.5	4.9856e-08
XM_020820437.2	monosaccharide-sensing protein 2, transcript variant X2	XR_002304478.2	ata-miR396e-3p	3	0.5	4.9856e-08
XM_020820437.2	monosaccharide-sensing protein 2, transcript variant X2	XR_002304478.2	osa-miR396a-3p	3	0.5	4.9856e-08
XM_020820438.2	monosaccharide-sensing protein 2, transcript variant X1	XR_002304478.2	aly-miR396a-3p	3	0.5	4.9856e-08
XM_020820438.2	monosaccharide-sensing protein 2, transcript variant X1	XR_002304478.2	ata-miR396e-3p	3	0.5	4.9856e-08
XM_020820438.2	monosaccharide-sensing protein 2, transcript variant X1	XR_002304478.2	osa-miR396a-3p	3	0.5	4.9856e-08
XM_020820547.2	uncharacterized LOC110095133	TCONS_00000010	bdi-miR156a	4	0.4	0
XM_020820547.2	uncharacterized LOC110095133	TCONS_00030768	bdi-miR156a	3	0.428571	6.67213e-10
XM_020820547.2	uncharacterized LOC110095133	TCONS_00036429	bdi-miR156a	4	0.285714	0
XM_020820547.2	uncharacterized LOC110095133	XR_002302737.2	bdi-miR156a	4	0.571429	0
XM_020820547.2	uncharacterized LOC110095133	XR_002303219.2	bdi-miR156a	4	0.105263	0
XM_020820547.2	uncharacterized LOC110095133	XR_003701135.1	bdi-miR156a	4	0.4	0
XM_020820547.2	uncharacterized LOC110095133	XR_003702334.1	bdi-miR156a	4	0.210526	0
XM_020820593.2	tRNase Z TRZ3, mitochondrial, transcript variant X2	XR_003702596.1	eun-miR172c-5p	5	0.2	7.41585e-10
XM_020820593.2	tRNase Z TRZ3, mitochondrial, transcript variant X2	XR_003702767.1	eun-miR172c-5p	5	0.138889	7.41585e-10
XM_020820661.2	beta-glucosidase-like SFR2, chloroplastic	XR_003702767.1	sly-miR156e-5p	3	0.0833333	0
XM_020820711.2	beta-hexosaminidase 3	TCONS_00005590	bdi-miR159b-3p.1	3	0.272727	0
XM_020820711.2	beta-hexosaminidase 3	TCONS_00031314	bdi-miR159b-3p.1	3	0.157895	0
XM_020820711.2	beta-hexosaminidase 3	TCONS_00032841	bdi-miR159b-3p.1	3	0.111111	0
XM_020820711.2	beta-hexosaminidase 3	TCONS_00032842	bdi-miR159b-3p.1	3	0.0967742	0
XM_020820711.2	beta-hexosaminidase 3	XR_002303623.2	bdi-miR159b-3p.1	3	0.115385	0
XM_020820711.2	beta-hexosaminidase 3	XR_002303625.2	bdi-miR159b-3p.1	3	0.115385	0
XM_020820711.2	beta-hexosaminidase 3	XR_003701426.1	bdi-miR159b-3p.1	3	0.107143	0
XM_020820711.2	beta-hexosaminidase 3	XR_003702492.1	bdi-miR159b-3p.1	3	0.115385	0
XM_020820711.2	beta-hexosaminidase 3	XR_003702493.1	bdi-miR159b-3p.1	3	0.115385	0
XM_020820771.2	probable transcription factor PosF21, transcript variant X2	XR_003702596.1	eun-miR172c-5p	9	0.36	1.27164e-15
XM_020820771.2	probable transcription factor PosF21, transcript variant X2	XR_003702767.1	eun-miR172c-5p	6	0.166667	4.75234e-09
XM_020820911.2	AP2-associated protein kinase 1	TCONS_00002865	aly-miR157d-5p	3	0.6	3.17353e-06
XM_020820911.2	AP2-associated protein kinase 1	TCONS_00002865	gma-miR156e	3	0.6	3.17353e-06
XM_020820911.2	AP2-associated protein kinase 1	TCONS_00002865	gma-miR156r	3	0.6	3.17353e-06
XM_020820911.2	AP2-associated protein kinase 1	TCONS_00033747	ahy-miR156b-5p	7	0.4375	3.23338e-17
XM_020820911.2	AP2-associated protein kinase 1	TCONS_00033747	aly-miR157d-5p	7	0.4375	3.23338e-17
XM_020820911.2	AP2-associated protein kinase 1	TCONS_00033747	bcy-miR156	7	0.4375	3.23338e-17
XM_020820911.2	AP2-associated protein kinase 1	TCONS_00033747	gma-miR156e	7	0.4375	3.23338e-17
XM_020820911.2	AP2-associated protein kinase 1	TCONS_00033747	gma-miR156r	7	0.4375	3.23338e-17
XM_020820911.2	AP2-associated protein kinase 1	XR_003701652.1	ahy-miR156b-5p	5	0.263158	8.32271e-11
XM_020820911.2	AP2-associated protein kinase 1	XR_003701652.1	aly-miR157d-5p	5	0.263158	8.32271e-11
XM_020820911.2	AP2-associated protein kinase 1	XR_003701652.1	gma-miR156e	5	0.263158	8.32271e-11
XM_020820911.2	AP2-associated protein kinase 1	XR_003701652.1	gma-miR156r	5	0.263158	8.32271e-11
XM_020821072.2	uncharacterized LOC110095504, transcript variant X2	TCONS_00010551	osa-miR395b	4	1	0.000405553
XM_020821072.2	uncharacterized LOC110095504, transcript variant X2	TCONS_00023661	aly-miR395d-3p	7	0.318182	5.01276e-08
XM_020821072.2	uncharacterized LOC110095504, transcript variant X2	TCONS_00023661	cme-miR395b	7	0.318182	5.01276e-08
XM_020821072.2	uncharacterized LOC110095504, transcript variant X2	TCONS_00023661	sly-miR395a	7	0.318182	5.01276e-08
XM_020821072.2	uncharacterized LOC110095504, transcript variant X2	TCONS_00025156	aly-miR395d-3p	5	1	2.75304e-05
XM_020821072.2	uncharacterized LOC110095504, transcript variant X2	TCONS_00025156	mdm-miR395l	5	1	2.75304e-05
XM_020821072.2	uncharacterized LOC110095504, transcript variant X2	TCONS_00025156	sly-miR395a	5	1	2.75304e-05
XM_020821072.2	uncharacterized LOC110095504, transcript variant X2	XR_002304634.2	eun-miR395-3p	5	0.294118	2.75304e-05
XM_020821072.2	uncharacterized LOC110095504, transcript variant X2	XR_003700116.1	eun-miR395-3p	4	0.16	0.000405553
XM_020821072.2	uncharacterized LOC110095504, transcript variant X2	XR_003701379.1	aly-miR395d-3p	11	0.785714	3.66196e-15
XM_020821072.2	uncharacterized LOC110095504, transcript variant X2	XR_003701379.1	cme-miR395b	11	0.785714	3.66196e-15
XM_020821072.2	uncharacterized LOC110095504, transcript variant X2	XR_003701379.1	eun-miR395-3p	11	0.785714	3.66196e-15
XM_020821072.2	uncharacterized LOC110095504, transcript variant X2	XR_003701379.1	mdm-miR395l	11	0.785714	3.66196e-15
XM_020821072.2	uncharacterized LOC110095504, transcript variant X2	XR_003701379.1	osa-miR395b	11	0.785714	3.66196e-15
XM_020821072.2	uncharacterized LOC110095504, transcript variant X2	XR_003701379.1	sly-miR395a	11	0.785714	3.66196e-15
XM_020821072.2	uncharacterized LOC110095504, transcript variant X2	XR_003701381.1	aly-miR395d-3p	11	0.785714	3.66196e-15
XM_020821072.2	uncharacterized LOC110095504, transcript variant X2	XR_003701381.1	cme-miR395b	11	0.785714	3.66196e-15
XM_020821072.2	uncharacterized LOC110095504, transcript variant X2	XR_003701381.1	eun-miR395-3p	11	0.785714	3.66196e-15
XM_020821072.2	uncharacterized LOC110095504, transcript variant X2	XR_003701381.1	mdm-miR395l	11	0.785714	3.66196e-15
XM_020821072.2	uncharacterized LOC110095504, transcript variant X2	XR_003701381.1	osa-miR395b	11	0.785714	3.66196e-15
XM_020821072.2	uncharacterized LOC110095504, transcript variant X2	XR_003701381.1	sly-miR395a	11	0.785714	3.66196e-15
XM_020821072.2	uncharacterized LOC110095504, transcript variant X2	XR_003703321.1	aly-miR395d-3p	4	1	0.000405553
XM_020821072.2	uncharacterized LOC110095504, transcript variant X2	XR_003703321.1	sly-miR395a	4	1	0.000405553
XM_020821115.2	heparanase-like protein 2	TCONS_00017118	cca-miR396a-3p	6	1	1.11002e-13
XM_020821115.2	heparanase-like protein 2	TCONS_00017118	cca-miR396c	6	1	1.11002e-13
XM_020821115.2	heparanase-like protein 2	XR_002303327.2	cca-miR396a-3p	4	0.190476	2.37436e-08
XM_020821115.2	heparanase-like protein 2	XR_002303327.2	cca-miR396c	4	0.190476	2.37436e-08
XM_020821462.2	uncharacterized LOC110095786, transcript variant X3	TCONS_00005590	aly-miR159c-3p	5	0.454545	1.28254e-05
XM_020821462.2	uncharacterized LOC110095786, transcript variant X3	TCONS_00005590	bdi-miR159b-3p.1	5	0.454545	1.28254e-05
XM_020821462.2	uncharacterized LOC110095786, transcript variant X3	TCONS_00017086	cme-miR159b	13	0.764706	5.26498e-21
XM_020821462.2	uncharacterized LOC110095786, transcript variant X3	TCONS_00017086	cpa-miR159b	13	0.764706	5.26498e-21
XM_020821462.2	uncharacterized LOC110095786, transcript variant X3	TCONS_00017086	fve-miR159c	13	0.764706	5.26498e-21
XM_020821462.2	uncharacterized LOC110095786, transcript variant X3	TCONS_00017086	osa-miR159c	13	0.764706	5.26498e-21
XM_020821462.2	uncharacterized LOC110095786, transcript variant X3	TCONS_00017086	osa-miR159d	13	0.764706	5.26498e-21
XM_020821462.2	uncharacterized LOC110095786, transcript variant X3	TCONS_00017086	pta-miR159c	13	0.764706	5.26498e-21
XM_020821462.2	uncharacterized LOC110095786, transcript variant X3	TCONS_00017086	ptc-miR159d	13	0.764706	5.26498e-21
XM_020821462.2	uncharacterized LOC110095786, transcript variant X3	TCONS_00031314	aly-miR159c-3p	5	0.263158	1.28254e-05
XM_020821462.2	uncharacterized LOC110095786, transcript variant X3	TCONS_00031314	bdi-miR159b-3p.1	5	0.263158	1.28254e-05
XM_020821462.2	uncharacterized LOC110095786, transcript variant X3	TCONS_00032841	aly-miR159c-3p	12	0.444444	1.92357e-18
XM_020821462.2	uncharacterized LOC110095786, transcript variant X3	TCONS_00032841	bdi-miR159b-3p.1	12	0.444444	1.92357e-18
XM_020821462.2	uncharacterized LOC110095786, transcript variant X3	TCONS_00032841	cme-miR159b	12	0.444444	1.92357e-18
XM_020821462.2	uncharacterized LOC110095786, transcript variant X3	TCONS_00032841	cpa-miR159b	12	0.444444	1.92357e-18
XM_020821462.2	uncharacterized LOC110095786, transcript variant X3	TCONS_00032841	fve-miR159c	12	0.444444	1.92357e-18
XM_020821462.2	uncharacterized LOC110095786, transcript variant X3	TCONS_00032841	osa-miR159d	12	0.444444	1.92357e-18
XM_020821462.2	uncharacterized LOC110095786, transcript variant X3	TCONS_00032841	osa-miR159f	12	0.444444	1.92357e-18
XM_020821462.2	uncharacterized LOC110095786, transcript variant X3	TCONS_00032841	pta-miR159c	12	0.444444	1.92357e-18
XM_020821462.2	uncharacterized LOC110095786, transcript variant X3	TCONS_00032841	ptc-miR159d	12	0.444444	1.92357e-18
XM_020821462.2	uncharacterized LOC110095786, transcript variant X3	TCONS_00032842	aly-miR159c-3p	12	0.387097	1.92357e-18
XM_020821462.2	uncharacterized LOC110095786, transcript variant X3	TCONS_00032842	bdi-miR159b-3p.1	12	0.387097	1.92357e-18
XM_020821462.2	uncharacterized LOC110095786, transcript variant X3	TCONS_00032842	cme-miR159b	12	0.387097	1.92357e-18
XM_020821462.2	uncharacterized LOC110095786, transcript variant X3	TCONS_00032842	cpa-miR159b	12	0.387097	1.92357e-18
XM_020821462.2	uncharacterized LOC110095786, transcript variant X3	TCONS_00032842	fve-miR159c	12	0.387097	1.92357e-18
XM_020821462.2	uncharacterized LOC110095786, transcript variant X3	TCONS_00032842	osa-miR159d	12	0.387097	1.92357e-18
XM_020821462.2	uncharacterized LOC110095786, transcript variant X3	TCONS_00032842	osa-miR159f	12	0.387097	1.92357e-18
XM_020821462.2	uncharacterized LOC110095786, transcript variant X3	TCONS_00032842	pta-miR159c	12	0.387097	1.92357e-18
XM_020821462.2	uncharacterized LOC110095786, transcript variant X3	TCONS_00032842	ptc-miR159d	12	0.387097	1.92357e-18
XM_020821462.2	uncharacterized LOC110095786, transcript variant X3	TCONS_00037662	cme-miR159b	4	0.285714	0.000222286
XM_020821462.2	uncharacterized LOC110095786, transcript variant X3	TCONS_00037662	fve-miR159c	4	0.285714	0.000222286
XM_020821462.2	uncharacterized LOC110095786, transcript variant X3	TCONS_00037662	osa-miR159c	4	0.285714	0.000222286
XM_020821462.2	uncharacterized LOC110095786, transcript variant X3	TCONS_00037662	osa-miR159d	4	0.285714	0.000222286
XM_020821462.2	uncharacterized LOC110095786, transcript variant X3	XR_002303623.2	aly-miR159c-3p	5	0.192308	1.28254e-05
XM_020821462.2	uncharacterized LOC110095786, transcript variant X3	XR_002303623.2	bdi-miR159b-3p.1	5	0.192308	1.28254e-05
XM_020821462.2	uncharacterized LOC110095786, transcript variant X3	XR_002303625.2	aly-miR159c-3p	5	0.192308	1.28254e-05
XM_020821462.2	uncharacterized LOC110095786, transcript variant X3	XR_002303625.2	bdi-miR159b-3p.1	5	0.192308	1.28254e-05
XM_020821462.2	uncharacterized LOC110095786, transcript variant X3	XR_002305298.2	cpa-miR159b	4	0.235294	0.000222286
XM_020821462.2	uncharacterized LOC110095786, transcript variant X3	XR_002305298.2	osa-miR159f	4	0.235294	0.000222286
XM_020821462.2	uncharacterized LOC110095786, transcript variant X3	XR_002305298.2	pta-miR159c	4	0.235294	0.000222286
XM_020821462.2	uncharacterized LOC110095786, transcript variant X3	XR_002305298.2	ptc-miR159d	4	0.235294	0.000222286
XM_020821462.2	uncharacterized LOC110095786, transcript variant X3	XR_003701426.1	aly-miR159c-3p	5	0.178571	1.28254e-05
XM_020821462.2	uncharacterized LOC110095786, transcript variant X3	XR_003701426.1	bdi-miR159b-3p.1	5	0.178571	1.28254e-05
XM_020821462.2	uncharacterized LOC110095786, transcript variant X3	XR_003702492.1	aly-miR159c-3p	5	0.192308	1.28254e-05
XM_020821462.2	uncharacterized LOC110095786, transcript variant X3	XR_003702492.1	bdi-miR159b-3p.1	5	0.192308	1.28254e-05
XM_020821462.2	uncharacterized LOC110095786, transcript variant X3	XR_003702493.1	aly-miR159c-3p	5	0.192308	1.28254e-05
XM_020821462.2	uncharacterized LOC110095786, transcript variant X3	XR_003702493.1	bdi-miR159b-3p.1	5	0.192308	1.28254e-05
XM_020821805.2	eukaryotic peptide chain release factor subunit 1-3-like, transcript variant X1	XR_003701328.1	aly-miR169a-5p	4	0.0597015	7.70454e-12
XM_020821886.2	receptor-like protein 7	TCONS_00010551	aof-miR395a	4	1	0.000222286
XM_020821886.2	receptor-like protein 7	TCONS_00010551	osa-miR395b	4	1	0.000222286
XM_020821886.2	receptor-like protein 7	TCONS_00023661	aly-miR395d-3p	5	0.227273	1.28254e-05
XM_020821886.2	receptor-like protein 7	TCONS_00023661	cme-miR395b	5	0.227273	1.28254e-05
XM_020821886.2	receptor-like protein 7	TCONS_00023661	sly-miR395a	5	0.227273	1.28254e-05
XM_020821886.2	receptor-like protein 7	TCONS_00023668	aof-miR395a	6	1	5.34306e-07
XM_020821886.2	receptor-like protein 7	TCONS_00023668	ata-miR395e-3p	6	1	5.34306e-07
XM_020821886.2	receptor-like protein 7	TCONS_00023668	eun-miR395-3p	6	1	5.34306e-07
XM_020821886.2	receptor-like protein 7	TCONS_00024832	aly-miR395d-3p	11	0.916667	4.16891e-16
XM_020821886.2	receptor-like protein 7	TCONS_00024832	ata-miR395e-3p	11	0.916667	4.16891e-16
XM_020821886.2	receptor-like protein 7	TCONS_00024832	cme-miR395b	11	0.916667	4.16891e-16
XM_020821886.2	receptor-like protein 7	TCONS_00024832	eun-miR395-3p	11	0.916667	4.16891e-16
XM_020821886.2	receptor-like protein 7	TCONS_00024832	sly-miR395a	11	0.916667	4.16891e-16
XM_020821886.2	receptor-like protein 7	TCONS_00025156	aly-miR395d-3p	3	0.6	0.00275069
XM_020821886.2	receptor-like protein 7	TCONS_00025156	mdm-miR395l	3	0.6	0.00275069
XM_020821886.2	receptor-like protein 7	TCONS_00025156	sly-miR395a	3	0.6	0.00275069
XM_020821886.2	receptor-like protein 7	TCONS_00025990	aly-miR395d-3p	11	0.916667	4.16891e-16
XM_020821886.2	receptor-like protein 7	TCONS_00025990	aof-miR395a	11	0.916667	4.16891e-16
XM_020821886.2	receptor-like protein 7	TCONS_00025990	ata-miR395e-3p	11	0.916667	4.16891e-16
XM_020821886.2	receptor-like protein 7	TCONS_00025990	cme-miR395b	11	0.916667	4.16891e-16
XM_020821886.2	receptor-like protein 7	TCONS_00025990	eun-miR395-3p	11	0.916667	4.16891e-16
XM_020821886.2	receptor-like protein 7	TCONS_00025990	mdm-miR395l	11	0.916667	4.16891e-16
XM_020821886.2	receptor-like protein 7	TCONS_00025990	osa-miR395b	11	0.916667	4.16891e-16
XM_020821886.2	receptor-like protein 7	TCONS_00025990	sly-miR395a	11	0.916667	4.16891e-16
XM_020821886.2	receptor-like protein 7	TCONS_00032470	aly-miR395d-3p	8	0.8	3.4967e-10
XM_020821886.2	receptor-like protein 7	TCONS_00032470	aof-miR395a	8	0.8	3.4967e-10
XM_020821886.2	receptor-like protein 7	TCONS_00032470	ata-miR395e-3p	8	0.8	3.4967e-10
XM_020821886.2	receptor-like protein 7	TCONS_00032470	sly-miR395a	8	0.8	3.4967e-10
XM_020821886.2	receptor-like protein 7	XR_002303785.2	ata-miR395e-3p	3	0.75	0.00275069
XM_020821886.2	receptor-like protein 7	XR_002304634.2	eun-miR395-3p	4	0.235294	0.000222286
XM_020821886.2	receptor-like protein 7	XR_003700116.1	eun-miR395-3p	3	0.12	0.00275069
XM_020821886.2	receptor-like protein 7	XR_003701379.1	aly-miR395d-3p	8	0.571429	3.4967e-10
XM_020821886.2	receptor-like protein 7	XR_003701379.1	cme-miR395b	8	0.571429	3.4967e-10
XM_020821886.2	receptor-like protein 7	XR_003701379.1	eun-miR395-3p	8	0.571429	3.4967e-10
XM_020821886.2	receptor-like protein 7	XR_003701379.1	mdm-miR395l	8	0.571429	3.4967e-10
XM_020821886.2	receptor-like protein 7	XR_003701379.1	osa-miR395b	8	0.571429	3.4967e-10
XM_020821886.2	receptor-like protein 7	XR_003701379.1	sly-miR395a	8	0.571429	3.4967e-10
XM_020821886.2	receptor-like protein 7	XR_003701381.1	aly-miR395d-3p	8	0.571429	3.4967e-10
XM_020821886.2	receptor-like protein 7	XR_003701381.1	cme-miR395b	8	0.571429	3.4967e-10
XM_020821886.2	receptor-like protein 7	XR_003701381.1	eun-miR395-3p	8	0.571429	3.4967e-10
XM_020821886.2	receptor-like protein 7	XR_003701381.1	mdm-miR395l	8	0.571429	3.4967e-10
XM_020821886.2	receptor-like protein 7	XR_003701381.1	osa-miR395b	8	0.571429	3.4967e-10
XM_020821886.2	receptor-like protein 7	XR_003701381.1	sly-miR395a	8	0.571429	3.4967e-10
XM_020821886.2	receptor-like protein 7	XR_003703321.1	aly-miR395d-3p	4	1	0.000222286
XM_020821886.2	receptor-like protein 7	XR_003703321.1	sly-miR395a	4	1	0.000222286
XM_020821932.2	LRR receptor-like serine/threonine-protein kinase GSO1	XR_003700791.1	aly-miR390a-5p	3	0.428571	0.00532996
XM_020822032.2	transcription factor MYB44	TCONS_00018019	aof-miR319b	3	0.6	2.75137e-05
XM_020822032.2	transcription factor MYB44	XR_003699683.1	aof-miR319b	3	0.333333	2.75137e-05
XM_020822108.2	beta-xylosidase/alpha-L-arabinofuranosidase 1-like	XR_003702439.1	mes-miR166i	5	0.151515	8.18309e-07
XM_020822153.2	uncharacterized LOC110096283, transcript variant X1	TCONS_00000071	aly-miR156g-5p	3	0.375	0.00168634
XM_020822153.2	uncharacterized LOC110096283, transcript variant X1	TCONS_00032841	aly-miR156a-5p	4	0.148148	0.000115918
XM_020822153.2	uncharacterized LOC110096283, transcript variant X1	TCONS_00032842	aly-miR156a-5p	4	0.129032	0.000115918
XM_020822153.2	uncharacterized LOC110096283, transcript variant X1	XR_002303219.2	aly-miR156a-5p	6	0.157895	1.92363e-07
XM_020822153.2	uncharacterized LOC110096283, transcript variant X1	XR_002303219.2	aly-miR156g-5p	6	0.157895	1.92363e-07
XM_020822153.2	uncharacterized LOC110096283, transcript variant X1	XR_003701652.1	aly-miR156a-5p	4	0.210526	0.000115918
XM_020822153.2	uncharacterized LOC110096283, transcript variant X1	XR_003701652.1	mtr-miR156j	4	0.210526	0.000115918
XM_020822153.2	uncharacterized LOC110096283, transcript variant X1	XR_003702334.1	aly-miR156a-5p	4	0.210526	0.000115918
XM_020822153.2	uncharacterized LOC110096283, transcript variant X1	XR_003702334.1	aly-miR156g-5p	4	0.210526	0.000115918
XM_020822153.2	uncharacterized LOC110096283, transcript variant X1	XR_003702767.1	aly-miR156a-5p	3	0.0833333	0.00168634
XM_020822191.2	delta(8)-fatty-acid desaturase	TCONS_00017086	cpa-miR159b	3	0.176471	8.03797e-07
XM_020822191.2	delta(8)-fatty-acid desaturase	TCONS_00032841	bdi-miR159a-3p	4	0.148148	3.37151e-09
XM_020822191.2	delta(8)-fatty-acid desaturase	TCONS_00032841	cpa-miR159b	4	0.148148	3.37151e-09
XM_020822191.2	delta(8)-fatty-acid desaturase	TCONS_00032841	osa-miR159f	4	0.148148	3.37151e-09
XM_020822191.2	delta(8)-fatty-acid desaturase	TCONS_00032841	pta-miR159a	4	0.148148	3.37151e-09
XM_020822191.2	delta(8)-fatty-acid desaturase	TCONS_00032842	bdi-miR159a-3p	4	0.129032	3.37151e-09
XM_020822191.2	delta(8)-fatty-acid desaturase	TCONS_00032842	cpa-miR159b	4	0.129032	3.37151e-09
XM_020822191.2	delta(8)-fatty-acid desaturase	TCONS_00032842	osa-miR159f	4	0.129032	3.37151e-09
XM_020822191.2	delta(8)-fatty-acid desaturase	TCONS_00032842	pta-miR159a	4	0.129032	3.37151e-09
XM_020822191.2	delta(8)-fatty-acid desaturase	TCONS_00037662	pta-miR159a	3	0.214286	8.03797e-07
XM_020822191.2	delta(8)-fatty-acid desaturase	XR_002305298.2	bdi-miR159a-3p	3	0.176471	8.03797e-07
XM_020822191.2	delta(8)-fatty-acid desaturase	XR_002305298.2	cpa-miR159b	3	0.176471	8.03797e-07
XM_020822191.2	delta(8)-fatty-acid desaturase	XR_002305298.2	osa-miR159f	3	0.176471	8.03797e-07
XM_020822359.2	heparan-alpha-glucosaminide N-acetyltransferase, transcript variant X1	TCONS_00005590	aly-miR159c-3p	9	0.818182	1.1726e-05
XM_020822359.2	heparan-alpha-glucosaminide N-acetyltransferase, transcript variant X1	TCONS_00005590	bdi-miR159b-3p.1	9	0.818182	1.1726e-05
XM_020822359.2	heparan-alpha-glucosaminide N-acetyltransferase, transcript variant X1	TCONS_00018697	aly-miR167a-5p	12	1	7.16432e-09
XM_020822359.2	heparan-alpha-glucosaminide N-acetyltransferase, transcript variant X1	TCONS_00018697	bna-miR167a	12	1	7.16432e-09
XM_020822359.2	heparan-alpha-glucosaminide N-acetyltransferase, transcript variant X1	TCONS_00026869	aly-miR167a-5p	13	0.866667	4.21791e-10
XM_020822359.2	heparan-alpha-glucosaminide N-acetyltransferase, transcript variant X1	TCONS_00026869	bna-miR167a	13	0.866667	4.21791e-10
XM_020822359.2	heparan-alpha-glucosaminide N-acetyltransferase, transcript variant X1	TCONS_00031314	aly-miR159c-3p	11	0.578947	1.01373e-07
XM_020822359.2	heparan-alpha-glucosaminide N-acetyltransferase, transcript variant X1	TCONS_00031314	bdi-miR159b-3p.1	11	0.578947	1.01373e-07
XM_020822359.2	heparan-alpha-glucosaminide N-acetyltransferase, transcript variant X1	TCONS_00031314	gma-miR319p	11	0.578947	1.01373e-07
XM_020822359.2	heparan-alpha-glucosaminide N-acetyltransferase, transcript variant X1	TCONS_00032841	aly-miR159c-3p	6	0.222222	0.00355391
XM_020822359.2	heparan-alpha-glucosaminide N-acetyltransferase, transcript variant X1	TCONS_00032841	bdi-miR159b-3p.1	6	0.222222	0.00355391
XM_020822359.2	heparan-alpha-glucosaminide N-acetyltransferase, transcript variant X1	TCONS_00032841	pta-miR159a	6	0.222222	0.00355391
XM_020822359.2	heparan-alpha-glucosaminide N-acetyltransferase, transcript variant X1	TCONS_00032842	aly-miR159c-3p	6	0.193548	0.00355391
XM_020822359.2	heparan-alpha-glucosaminide N-acetyltransferase, transcript variant X1	TCONS_00032842	bdi-miR159b-3p.1	6	0.193548	0.00355391
XM_020822359.2	heparan-alpha-glucosaminide N-acetyltransferase, transcript variant X1	TCONS_00032842	pta-miR159a	6	0.193548	0.00355391
XM_020822359.2	heparan-alpha-glucosaminide N-acetyltransferase, transcript variant X1	XR_002303623.2	aly-miR159c-3p	6	0.230769	0.00355391
XM_020822359.2	heparan-alpha-glucosaminide N-acetyltransferase, transcript variant X1	XR_002303623.2	bdi-miR159b-3p.1	6	0.230769	0.00355391
XM_020822359.2	heparan-alpha-glucosaminide N-acetyltransferase, transcript variant X1	XR_002303625.2	aly-miR159c-3p	6	0.230769	0.00355391
XM_020822359.2	heparan-alpha-glucosaminide N-acetyltransferase, transcript variant X1	XR_002303625.2	bdi-miR159b-3p.1	6	0.230769	0.00355391
XM_020822359.2	heparan-alpha-glucosaminide N-acetyltransferase, transcript variant X1	XR_003701426.1	aly-miR159c-3p	9	0.321429	1.1726e-05
XM_020822359.2	heparan-alpha-glucosaminide N-acetyltransferase, transcript variant X1	XR_003701426.1	bdi-miR159b-3p.1	9	0.321429	1.1726e-05
XM_020822359.2	heparan-alpha-glucosaminide N-acetyltransferase, transcript variant X1	XR_003701426.1	gma-miR319p	9	0.321429	1.1726e-05
XM_020822359.2	heparan-alpha-glucosaminide N-acetyltransferase, transcript variant X1	XR_003702199.1	aly-miR167a-5p	13	0.342105	4.21791e-10
XM_020822359.2	heparan-alpha-glucosaminide N-acetyltransferase, transcript variant X1	XR_003702199.1	bna-miR167a	13	0.342105	4.21791e-10
XM_020822359.2	heparan-alpha-glucosaminide N-acetyltransferase, transcript variant X1	XR_003702200.1	aly-miR167a-5p	13	0.361111	4.21791e-10
XM_020822359.2	heparan-alpha-glucosaminide N-acetyltransferase, transcript variant X1	XR_003702200.1	bna-miR167a	13	0.361111	4.21791e-10
XM_020822359.2	heparan-alpha-glucosaminide N-acetyltransferase, transcript variant X1	XR_003702492.1	aly-miR159c-3p	6	0.230769	0.00355391
XM_020822359.2	heparan-alpha-glucosaminide N-acetyltransferase, transcript variant X1	XR_003702492.1	bdi-miR159b-3p.1	6	0.230769	0.00355391
XM_020822359.2	heparan-alpha-glucosaminide N-acetyltransferase, transcript variant X1	XR_003702493.1	aly-miR159c-3p	6	0.230769	0.00355391
XM_020822359.2	heparan-alpha-glucosaminide N-acetyltransferase, transcript variant X1	XR_003702493.1	bdi-miR159b-3p.1	6	0.230769	0.00355391
XM_020822408.2	thermospermine synthase ACAULIS5, transcript variant X2	XR_003701328.1	aly-miR169a-5p	8	0.119403	4.29875e-08
XM_020822408.2	thermospermine synthase ACAULIS5, transcript variant X2	XR_003701328.1	NW_021390876.1_12379	8	0.119403	4.29875e-08
XM_020822411.2	probable inactive purple acid phosphatase 27, transcript variant X1	TCONS_00017086	cpa-miR159b	3	0.176471	1.49014e-07
XM_020822411.2	probable inactive purple acid phosphatase 27, transcript variant X1	TCONS_00017086	pta-miR159c	3	0.176471	1.49014e-07
XM_020822411.2	probable inactive purple acid phosphatase 27, transcript variant X1	TCONS_00017086	ptc-miR159d	3	0.176471	1.49014e-07
XM_020822411.2	probable inactive purple acid phosphatase 27, transcript variant X1	TCONS_00032841	cpa-miR159b	4	0.148148	2.76828e-10
XM_020822411.2	probable inactive purple acid phosphatase 27, transcript variant X1	TCONS_00032841	pta-miR159c	4	0.148148	2.76828e-10
XM_020822411.2	probable inactive purple acid phosphatase 27, transcript variant X1	TCONS_00032841	ptc-miR159d	4	0.148148	2.76828e-10
XM_020822411.2	probable inactive purple acid phosphatase 27, transcript variant X1	TCONS_00032842	cpa-miR159b	4	0.129032	2.76828e-10
XM_020822411.2	probable inactive purple acid phosphatase 27, transcript variant X1	TCONS_00032842	pta-miR159c	4	0.129032	2.76828e-10
XM_020822411.2	probable inactive purple acid phosphatase 27, transcript variant X1	TCONS_00032842	ptc-miR159d	4	0.129032	2.76828e-10
XM_020822411.2	probable inactive purple acid phosphatase 27, transcript variant X1	XR_002305298.2	cpa-miR159b	4	0.235294	2.76828e-10
XM_020822411.2	probable inactive purple acid phosphatase 27, transcript variant X1	XR_002305298.2	pta-miR159c	4	0.235294	2.76828e-10
XM_020822411.2	probable inactive purple acid phosphatase 27, transcript variant X1	XR_002305298.2	ptc-miR159d	4	0.235294	2.76828e-10
XM_020822414.2	probable inactive purple acid phosphatase 27, transcript variant X4	TCONS_00017086	cpa-miR159b	3	0.176471	1.49014e-07
XM_020822414.2	probable inactive purple acid phosphatase 27, transcript variant X4	TCONS_00017086	pta-miR159c	3	0.176471	1.49014e-07
XM_020822414.2	probable inactive purple acid phosphatase 27, transcript variant X4	TCONS_00017086	ptc-miR159d	3	0.176471	1.49014e-07
XM_020822414.2	probable inactive purple acid phosphatase 27, transcript variant X4	TCONS_00032841	cpa-miR159b	4	0.148148	2.76828e-10
XM_020822414.2	probable inactive purple acid phosphatase 27, transcript variant X4	TCONS_00032841	pta-miR159c	4	0.148148	2.76828e-10
XM_020822414.2	probable inactive purple acid phosphatase 27, transcript variant X4	TCONS_00032841	ptc-miR159d	4	0.148148	2.76828e-10
XM_020822414.2	probable inactive purple acid phosphatase 27, transcript variant X4	TCONS_00032842	cpa-miR159b	4	0.129032	2.76828e-10
XM_020822414.2	probable inactive purple acid phosphatase 27, transcript variant X4	TCONS_00032842	pta-miR159c	4	0.129032	2.76828e-10
XM_020822414.2	probable inactive purple acid phosphatase 27, transcript variant X4	TCONS_00032842	ptc-miR159d	4	0.129032	2.76828e-10
XM_020822414.2	probable inactive purple acid phosphatase 27, transcript variant X4	XR_002305298.2	cpa-miR159b	4	0.235294	2.76828e-10
XM_020822414.2	probable inactive purple acid phosphatase 27, transcript variant X4	XR_002305298.2	pta-miR159c	4	0.235294	2.76828e-10
XM_020822414.2	probable inactive purple acid phosphatase 27, transcript variant X4	XR_002305298.2	ptc-miR159d	4	0.235294	2.76828e-10
XM_020822446.2	ATP sulfurylase 1, chloroplastic-like	TCONS_00010551	aof-miR395a	4	1	0.000222286
XM_020822446.2	ATP sulfurylase 1, chloroplastic-like	TCONS_00010551	osa-miR395b	4	1	0.000222286
XM_020822446.2	ATP sulfurylase 1, chloroplastic-like	TCONS_00023661	aly-miR395d-3p	7	0.318182	1.61099e-08
XM_020822446.2	ATP sulfurylase 1, chloroplastic-like	TCONS_00023661	cme-miR395b	7	0.318182	1.61099e-08
XM_020822446.2	ATP sulfurylase 1, chloroplastic-like	TCONS_00023661	sly-miR395a	7	0.318182	1.61099e-08
XM_020822446.2	ATP sulfurylase 1, chloroplastic-like	TCONS_00023668	aof-miR395a	6	1	5.34306e-07
XM_020822446.2	ATP sulfurylase 1, chloroplastic-like	TCONS_00023668	ata-miR395e-3p	6	1	5.34306e-07
XM_020822446.2	ATP sulfurylase 1, chloroplastic-like	TCONS_00023668	eun-miR395-3p	6	1	5.34306e-07
XM_020822446.2	ATP sulfurylase 1, chloroplastic-like	TCONS_00024832	aly-miR395d-3p	11	0.916667	4.16891e-16
XM_020822446.2	ATP sulfurylase 1, chloroplastic-like	TCONS_00024832	ata-miR395e-3p	11	0.916667	4.16891e-16
XM_020822446.2	ATP sulfurylase 1, chloroplastic-like	TCONS_00024832	cme-miR395b	11	0.916667	4.16891e-16
XM_020822446.2	ATP sulfurylase 1, chloroplastic-like	TCONS_00024832	eun-miR395-3p	11	0.916667	4.16891e-16
XM_020822446.2	ATP sulfurylase 1, chloroplastic-like	TCONS_00024832	sly-miR395a	11	0.916667	4.16891e-16
XM_020822446.2	ATP sulfurylase 1, chloroplastic-like	TCONS_00025156	aly-miR395d-3p	5	1	1.28254e-05
XM_020822446.2	ATP sulfurylase 1, chloroplastic-like	TCONS_00025156	mdm-miR395l	5	1	1.28254e-05
XM_020822446.2	ATP sulfurylase 1, chloroplastic-like	TCONS_00025156	sly-miR395a	5	1	1.28254e-05
XM_020822446.2	ATP sulfurylase 1, chloroplastic-like	TCONS_00025990	aly-miR395d-3p	12	1	1.92357e-18
XM_020822446.2	ATP sulfurylase 1, chloroplastic-like	TCONS_00025990	aof-miR395a	12	1	1.92357e-18
XM_020822446.2	ATP sulfurylase 1, chloroplastic-like	TCONS_00025990	ata-miR395e-3p	12	1	1.92357e-18
XM_020822446.2	ATP sulfurylase 1, chloroplastic-like	TCONS_00025990	cme-miR395b	12	1	1.92357e-18
XM_020822446.2	ATP sulfurylase 1, chloroplastic-like	TCONS_00025990	eun-miR395-3p	12	1	1.92357e-18
XM_020822446.2	ATP sulfurylase 1, chloroplastic-like	TCONS_00025990	mdm-miR395l	12	1	1.92357e-18
XM_020822446.2	ATP sulfurylase 1, chloroplastic-like	TCONS_00025990	osa-miR395b	12	1	1.92357e-18
XM_020822446.2	ATP sulfurylase 1, chloroplastic-like	TCONS_00025990	sly-miR395a	12	1	1.92357e-18
XM_020822446.2	ATP sulfurylase 1, chloroplastic-like	TCONS_00032470	aly-miR395d-3p	8	0.8	3.4967e-10
XM_020822446.2	ATP sulfurylase 1, chloroplastic-like	TCONS_00032470	aof-miR395a	8	0.8	3.4967e-10
XM_020822446.2	ATP sulfurylase 1, chloroplastic-like	TCONS_00032470	ata-miR395e-3p	8	0.8	3.4967e-10
XM_020822446.2	ATP sulfurylase 1, chloroplastic-like	TCONS_00032470	sly-miR395a	8	0.8	3.4967e-10
XM_020822446.2	ATP sulfurylase 1, chloroplastic-like	XR_002303785.2	ata-miR395e-3p	3	0.75	0.00275069
XM_020822446.2	ATP sulfurylase 1, chloroplastic-like	XR_002304634.2	eun-miR395-3p	7	0.411765	1.61099e-08
XM_020822446.2	ATP sulfurylase 1, chloroplastic-like	XR_003700116.1	eun-miR395-3p	4	0.16	0.000222286
XM_020822446.2	ATP sulfurylase 1, chloroplastic-like	XR_003701379.1	aly-miR395d-3p	11	0.785714	4.16891e-16
XM_020822446.2	ATP sulfurylase 1, chloroplastic-like	XR_003701379.1	cme-miR395b	11	0.785714	4.16891e-16
XM_020822446.2	ATP sulfurylase 1, chloroplastic-like	XR_003701379.1	eun-miR395-3p	11	0.785714	4.16891e-16
XM_020822446.2	ATP sulfurylase 1, chloroplastic-like	XR_003701379.1	mdm-miR395l	11	0.785714	4.16891e-16
XM_020822446.2	ATP sulfurylase 1, chloroplastic-like	XR_003701379.1	osa-miR395b	11	0.785714	4.16891e-16
XM_020822446.2	ATP sulfurylase 1, chloroplastic-like	XR_003701379.1	sly-miR395a	11	0.785714	4.16891e-16
XM_020822446.2	ATP sulfurylase 1, chloroplastic-like	XR_003701381.1	aly-miR395d-3p	11	0.785714	4.16891e-16
XM_020822446.2	ATP sulfurylase 1, chloroplastic-like	XR_003701381.1	cme-miR395b	11	0.785714	4.16891e-16
XM_020822446.2	ATP sulfurylase 1, chloroplastic-like	XR_003701381.1	eun-miR395-3p	11	0.785714	4.16891e-16
XM_020822446.2	ATP sulfurylase 1, chloroplastic-like	XR_003701381.1	mdm-miR395l	11	0.785714	4.16891e-16
XM_020822446.2	ATP sulfurylase 1, chloroplastic-like	XR_003701381.1	osa-miR395b	11	0.785714	4.16891e-16
XM_020822446.2	ATP sulfurylase 1, chloroplastic-like	XR_003701381.1	sly-miR395a	11	0.785714	4.16891e-16
XM_020822446.2	ATP sulfurylase 1, chloroplastic-like	XR_003703321.1	aly-miR395d-3p	4	1	0.000222286
XM_020822446.2	ATP sulfurylase 1, chloroplastic-like	XR_003703321.1	sly-miR395a	4	1	0.000222286
XM_020822447.2	calmodulin-like protein 11	XR_003702596.1	eun-miR172c-5p	5	0.2	0
XM_020822447.2	calmodulin-like protein 11	XR_003702767.1	eun-miR172c-5p	5	0.138889	0
XM_020822644.2	probable potassium transporter 17, transcript variant X1	TCONS_00005590	aly-miR159c-3p	9	0.818182	0.00150269
XM_020822644.2	probable potassium transporter 17, transcript variant X1	TCONS_00005590	bdi-miR159b-3p.1	9	0.818182	0.00150269
XM_020822644.2	probable potassium transporter 17, transcript variant X1	TCONS_00031314	aly-miR159c-3p	9	0.473684	0.00150269
XM_020822644.2	probable potassium transporter 17, transcript variant X1	TCONS_00031314	bdi-miR159b-3p.1	9	0.473684	0.00150269
XM_020822644.2	probable potassium transporter 17, transcript variant X1	TCONS_00031314	gma-miR319p	9	0.473684	0.00150269
XM_020822644.2	probable potassium transporter 17, transcript variant X1	TCONS_00031314	ptc-miR319i	9	0.473684	0.00150269
XM_020822644.2	probable potassium transporter 17, transcript variant X1	TCONS_00032841	aly-miR159c-3p	15	0.555556	1.5894e-08
XM_020822644.2	probable potassium transporter 17, transcript variant X1	TCONS_00032841	bdi-miR159a-3p	15	0.555556	1.5894e-08
XM_020822644.2	probable potassium transporter 17, transcript variant X1	TCONS_00032841	bdi-miR159b-3p.1	15	0.555556	1.5894e-08
XM_020822644.2	probable potassium transporter 17, transcript variant X1	TCONS_00032841	cme-miR159b	15	0.555556	1.5894e-08
XM_020822644.2	probable potassium transporter 17, transcript variant X1	TCONS_00032841	cpa-miR159b	15	0.555556	1.5894e-08
XM_020822644.2	probable potassium transporter 17, transcript variant X1	TCONS_00032841	fve-miR159c	15	0.555556	1.5894e-08
XM_020822644.2	probable potassium transporter 17, transcript variant X1	TCONS_00032841	osa-miR159d	15	0.555556	1.5894e-08
XM_020822644.2	probable potassium transporter 17, transcript variant X1	TCONS_00032841	osa-miR159f	15	0.555556	1.5894e-08
XM_020822644.2	probable potassium transporter 17, transcript variant X1	TCONS_00032841	pta-miR159a	15	0.555556	1.5894e-08
XM_020822644.2	probable potassium transporter 17, transcript variant X1	TCONS_00032841	pta-miR159c	15	0.555556	1.5894e-08
XM_020822644.2	probable potassium transporter 17, transcript variant X1	TCONS_00032841	ptc-miR159d	15	0.555556	1.5894e-08
XM_020822644.2	probable potassium transporter 17, transcript variant X1	TCONS_00032842	aly-miR159c-3p	15	0.483871	1.5894e-08
XM_020822644.2	probable potassium transporter 17, transcript variant X1	TCONS_00032842	bdi-miR159a-3p	15	0.483871	1.5894e-08
XM_020822644.2	probable potassium transporter 17, transcript variant X1	TCONS_00032842	bdi-miR159b-3p.1	15	0.483871	1.5894e-08
XM_020822644.2	probable potassium transporter 17, transcript variant X1	TCONS_00032842	cme-miR159b	15	0.483871	1.5894e-08
XM_020822644.2	probable potassium transporter 17, transcript variant X1	TCONS_00032842	cpa-miR159b	15	0.483871	1.5894e-08
XM_020822644.2	probable potassium transporter 17, transcript variant X1	TCONS_00032842	fve-miR159c	15	0.483871	1.5894e-08
XM_020822644.2	probable potassium transporter 17, transcript variant X1	TCONS_00032842	osa-miR159d	15	0.483871	1.5894e-08
XM_020822644.2	probable potassium transporter 17, transcript variant X1	TCONS_00032842	osa-miR159f	15	0.483871	1.5894e-08
XM_020822644.2	probable potassium transporter 17, transcript variant X1	TCONS_00032842	pta-miR159a	15	0.483871	1.5894e-08
XM_020822644.2	probable potassium transporter 17, transcript variant X1	TCONS_00032842	pta-miR159c	15	0.483871	1.5894e-08
XM_020822644.2	probable potassium transporter 17, transcript variant X1	TCONS_00032842	ptc-miR159d	15	0.483871	1.5894e-08
XM_020822644.2	probable potassium transporter 17, transcript variant X1	TCONS_00037662	cme-miR159b	7	0.5	0.0205189
XM_020822644.2	probable potassium transporter 17, transcript variant X1	TCONS_00037662	fve-miR159c	7	0.5	0.0205189
XM_020822644.2	probable potassium transporter 17, transcript variant X1	TCONS_00037662	osa-miR159c	7	0.5	0.0205189
XM_020822644.2	probable potassium transporter 17, transcript variant X1	TCONS_00037662	osa-miR159d	7	0.5	0.0205189
XM_020822644.2	probable potassium transporter 17, transcript variant X1	TCONS_00037662	pta-miR159a	7	0.5	0.0205189
XM_020822644.2	probable potassium transporter 17, transcript variant X1	XR_002305298.2	bdi-miR159a-3p	12	0.705882	9.42238e-06
XM_020822644.2	probable potassium transporter 17, transcript variant X1	XR_002305298.2	cpa-miR159b	12	0.705882	9.42238e-06
XM_020822644.2	probable potassium transporter 17, transcript variant X1	XR_002305298.2	csi-miR159c-3p	12	0.705882	9.42238e-06
XM_020822644.2	probable potassium transporter 17, transcript variant X1	XR_002305298.2	gma-miR319p	12	0.705882	9.42238e-06
XM_020822644.2	probable potassium transporter 17, transcript variant X1	XR_002305298.2	mes-miR319h	12	0.705882	9.42238e-06
XM_020822644.2	probable potassium transporter 17, transcript variant X1	XR_002305298.2	NW_021320138.1_11162	12	0.705882	9.42238e-06
XM_020822644.2	probable potassium transporter 17, transcript variant X1	XR_002305298.2	osa-miR159f	12	0.705882	9.42238e-06
XM_020822644.2	probable potassium transporter 17, transcript variant X1	XR_002305298.2	ppt-miR319a	12	0.705882	9.42238e-06
XM_020822644.2	probable potassium transporter 17, transcript variant X1	XR_002305298.2	pta-miR159c	12	0.705882	9.42238e-06
XM_020822644.2	probable potassium transporter 17, transcript variant X1	XR_002305298.2	ptc-miR159d	12	0.705882	9.42238e-06
XM_020822644.2	probable potassium transporter 17, transcript variant X1	XR_003701426.1	aau-miR319	17	0.607143	1.10145e-10
XM_020822644.2	probable potassium transporter 17, transcript variant X1	XR_003701426.1	aly-miR159c-3p	17	0.607143	1.10145e-10
XM_020822644.2	probable potassium transporter 17, transcript variant X1	XR_003701426.1	aly-miR319c-3p	17	0.607143	1.10145e-10
XM_020822644.2	probable potassium transporter 17, transcript variant X1	XR_003701426.1	atr-miR319a	17	0.607143	1.10145e-10
XM_020822644.2	probable potassium transporter 17, transcript variant X1	XR_003701426.1	bdi-miR159b-3p.1	17	0.607143	1.10145e-10
XM_020822644.2	probable potassium transporter 17, transcript variant X1	XR_003701426.1	cme-miR319c	17	0.607143	1.10145e-10
XM_020822644.2	probable potassium transporter 17, transcript variant X1	XR_003701426.1	csi-miR159c-3p	17	0.607143	1.10145e-10
XM_020822644.2	probable potassium transporter 17, transcript variant X1	XR_003701426.1	gma-miR319p	17	0.607143	1.10145e-10
XM_020822644.2	probable potassium transporter 17, transcript variant X1	XR_003701426.1	mes-miR319h	17	0.607143	1.10145e-10
XM_020822644.2	probable potassium transporter 17, transcript variant X1	XR_003701426.1	mtr-miR319c-3p	17	0.607143	1.10145e-10
XM_020822644.2	probable potassium transporter 17, transcript variant X1	XR_003701426.1	ppt-miR319a	17	0.607143	1.10145e-10
XM_020822644.2	probable potassium transporter 17, transcript variant X1	XR_003701426.1	pta-miR319	17	0.607143	1.10145e-10
XM_020822693.2	uncharacterized protein YnbD, transcript variant X1	TCONS_00033339	ahy-miR156b-5p	3	1	3.17353e-06
XM_020822693.2	uncharacterized protein YnbD, transcript variant X1	TCONS_00033339	bcy-miR156	3	1	3.17353e-06
XM_020822693.2	uncharacterized protein YnbD, transcript variant X1	TCONS_00033747	ahy-miR156b-5p	4	0.25	2.37436e-08
XM_020822693.2	uncharacterized protein YnbD, transcript variant X1	TCONS_00033747	bcy-miR156	4	0.25	2.37436e-08
XM_020822693.2	uncharacterized protein YnbD, transcript variant X1	TCONS_00033747	csi-miR156g-5p	4	0.25	2.37436e-08
XM_020822693.2	uncharacterized protein YnbD, transcript variant X1	XR_002305427.2	ahy-miR156b-5p	3	0.6	3.17353e-06
XM_020822693.2	uncharacterized protein YnbD, transcript variant X1	XR_002305427.2	csi-miR156g-5p	3	0.6	3.17353e-06
XM_020822743.2	putative pentatricopeptide repeat-containing protein At5g37570, transcript variant X3	XR_003699719.1	NW_021390876.1_12379	3	0.103448	6.67213e-10
XM_020822743.2	putative pentatricopeptide repeat-containing protein At5g37570, transcript variant X3	XR_003700958.1	NW_021390876.1_12379	3	0.333333	6.67213e-10
XM_020822829.2	COBRA-like protein 3	TCONS_00032841	aly-miR156a-5p	6	0.222222	1.85042e-08
XM_020822829.2	COBRA-like protein 3	TCONS_00032841	bna-miR156a	6	0.222222	1.85042e-08
XM_020822829.2	COBRA-like protein 3	TCONS_00032841	cca-miR156b	6	0.222222	1.85042e-08
XM_020822829.2	COBRA-like protein 3	TCONS_00032841	gma-miR156q	6	0.222222	1.85042e-08
XM_020822829.2	COBRA-like protein 3	TCONS_00032842	aly-miR156a-5p	6	0.193548	1.85042e-08
XM_020822829.2	COBRA-like protein 3	TCONS_00032842	bna-miR156a	6	0.193548	1.85042e-08
XM_020822829.2	COBRA-like protein 3	TCONS_00032842	cca-miR156b	6	0.193548	1.85042e-08
XM_020822829.2	COBRA-like protein 3	TCONS_00032842	gma-miR156q	6	0.193548	1.85042e-08
XM_020822829.2	COBRA-like protein 3	XR_002303219.2	aly-miR156a-5p	6	0.157895	1.85042e-08
XM_020822829.2	COBRA-like protein 3	XR_002303219.2	bna-miR156a	6	0.157895	1.85042e-08
XM_020822829.2	COBRA-like protein 3	XR_002303219.2	cca-miR156b	6	0.157895	1.85042e-08
XM_020822829.2	COBRA-like protein 3	XR_002303219.2	gma-miR156q	6	0.157895	1.85042e-08
XM_020822829.2	COBRA-like protein 3	XR_003701652.1	aly-miR156a-5p	6	0.315789	1.85042e-08
XM_020822829.2	COBRA-like protein 3	XR_003701652.1	bna-miR156a	6	0.315789	1.85042e-08
XM_020822829.2	COBRA-like protein 3	XR_003701652.1	cca-miR156b	6	0.315789	1.85042e-08
XM_020822829.2	COBRA-like protein 3	XR_003701652.1	gma-miR156q	6	0.315789	1.85042e-08
XM_020822829.2	COBRA-like protein 3	XR_003702334.1	aly-miR156a-5p	4	0.210526	2.63519e-05
XM_020822829.2	COBRA-like protein 3	XR_003702334.1	bna-miR156a	4	0.210526	2.63519e-05
XM_020822829.2	COBRA-like protein 3	XR_003702334.1	cca-miR156b	4	0.210526	2.63519e-05
XM_020822829.2	COBRA-like protein 3	XR_003702334.1	gma-miR156q	4	0.210526	2.63519e-05
XM_020822829.2	COBRA-like protein 3	XR_003702767.1	aly-miR156a-5p	6	0.166667	1.85042e-08
XM_020822829.2	COBRA-like protein 3	XR_003702767.1	bna-miR156a	6	0.166667	1.85042e-08
XM_020822829.2	COBRA-like protein 3	XR_003702767.1	cca-miR156b	6	0.166667	1.85042e-08
XM_020822829.2	COBRA-like protein 3	XR_003702767.1	gma-miR156q	6	0.166667	1.85042e-08
XM_020822859.2	PLASMODESMATA CALLOSE-BINDING PROTEIN 3-like	TCONS_00017087	lus-miR159b	15	0.882353	8.399e-19
XM_020822859.2	PLASMODESMATA CALLOSE-BINDING PROTEIN 3-like	XR_002302757.2	ahy-miR159	16	0.761905	5.92063e-21
XM_020822859.2	PLASMODESMATA CALLOSE-BINDING PROTEIN 3-like	XR_002302757.2	lus-miR159b	16	0.761905	5.92063e-21
XM_020822937.2	spermidine synthase 2, transcript variant X1	TCONS_00033747	ahy-miR156b-5p	3	0.1875	1.66495e-08
XM_020822937.2	spermidine synthase 2, transcript variant X1	TCONS_00033747	bcy-miR156	3	0.1875	1.66495e-08
XM_020822937.2	spermidine synthase 2, transcript variant X1	TCONS_00033747	ptc-miR156l	3	0.1875	1.66495e-08
XM_020822998.2	heat shock 70 kDa protein 8, transcript variant X2	TCONS_00010760	aly-miR396b-5p	3	0.25	6.67213e-10
XM_020822998.2	heat shock 70 kDa protein 8, transcript variant X2	TCONS_00010760	pab-miR396a-5p	3	0.25	6.67213e-10
XM_020822998.2	heat shock 70 kDa protein 8, transcript variant X2	TCONS_00010760	vca-miR396-5p	3	0.25	6.67213e-10
XM_020822998.2	heat shock 70 kDa protein 8, transcript variant X2	XR_003700291.1	aly-miR396b-5p	4	0.148148	0
XM_020822998.2	heat shock 70 kDa protein 8, transcript variant X2	XR_003700291.1	pab-miR396a-5p	4	0.148148	0
XM_020822998.2	heat shock 70 kDa protein 8, transcript variant X2	XR_003700291.1	vca-miR396-5p	4	0.148148	0
XM_020822998.2	heat shock 70 kDa protein 8, transcript variant X2	XR_003701085.1	aly-miR396b-5p	3	0.230769	6.67213e-10
XM_020822998.2	heat shock 70 kDa protein 8, transcript variant X2	XR_003701085.1	pab-miR396a-5p	3	0.230769	6.67213e-10
XM_020822998.2	heat shock 70 kDa protein 8, transcript variant X2	XR_003701085.1	vca-miR396-5p	3	0.230769	6.67213e-10
XM_020822998.2	heat shock 70 kDa protein 8, transcript variant X2	XR_003701912.1	aly-miR396b-5p	3	0.176471	6.67213e-10
XM_020822998.2	heat shock 70 kDa protein 8, transcript variant X2	XR_003701912.1	pab-miR396a-5p	3	0.176471	6.67213e-10
XM_020822998.2	heat shock 70 kDa protein 8, transcript variant X2	XR_003701912.1	vca-miR396-5p	3	0.176471	6.67213e-10
XM_020822998.2	heat shock 70 kDa protein 8, transcript variant X2	XR_003702242.1	aly-miR396b-5p	4	0.222222	0
XM_020822998.2	heat shock 70 kDa protein 8, transcript variant X2	XR_003702242.1	pab-miR396a-5p	4	0.222222	0
XM_020822998.2	heat shock 70 kDa protein 8, transcript variant X2	XR_003702242.1	vca-miR396-5p	4	0.222222	0
XM_020823128.2	clathrin interactor EPSIN 3, transcript variant X1	XR_003701652.1	aly-miR156a-5p	10	0.526316	5.30529e-17
XM_020823128.2	clathrin interactor EPSIN 3, transcript variant X1	XR_003701652.1	bna-miR156a	10	0.526316	5.30529e-17
XM_020823128.2	clathrin interactor EPSIN 3, transcript variant X1	XR_003701652.1	cca-miR156b	10	0.526316	5.30529e-17
XM_020823128.2	clathrin interactor EPSIN 3, transcript variant X1	XR_003701652.1	gma-miR156q	10	0.526316	5.30529e-17
XM_020823129.2	clathrin interactor EPSIN 3, transcript variant X2	TCONS_00000071	aly-miR156g-5p	3	0.375	0.000554279
XM_020823129.2	clathrin interactor EPSIN 3, transcript variant X2	TCONS_00032841	aly-miR156a-5p	7	0.259259	2.70401e-10
XM_020823129.2	clathrin interactor EPSIN 3, transcript variant X2	TCONS_00032841	bna-miR156a	7	0.259259	2.70401e-10
XM_020823129.2	clathrin interactor EPSIN 3, transcript variant X2	TCONS_00032841	cca-miR156b	7	0.259259	2.70401e-10
XM_020823129.2	clathrin interactor EPSIN 3, transcript variant X2	TCONS_00032841	gma-miR156q	7	0.259259	2.70401e-10
XM_020823129.2	clathrin interactor EPSIN 3, transcript variant X2	TCONS_00032842	aly-miR156a-5p	7	0.225806	2.70401e-10
XM_020823129.2	clathrin interactor EPSIN 3, transcript variant X2	TCONS_00032842	bna-miR156a	7	0.225806	2.70401e-10
XM_020823129.2	clathrin interactor EPSIN 3, transcript variant X2	TCONS_00032842	cca-miR156b	7	0.225806	2.70401e-10
XM_020823129.2	clathrin interactor EPSIN 3, transcript variant X2	TCONS_00032842	gma-miR156q	7	0.225806	2.70401e-10
XM_020823129.2	clathrin interactor EPSIN 3, transcript variant X2	XR_002303219.2	aly-miR156a-5p	9	0.236842	1.53448e-14
XM_020823129.2	clathrin interactor EPSIN 3, transcript variant X2	XR_002303219.2	aly-miR156g-5p	9	0.236842	1.53448e-14
XM_020823129.2	clathrin interactor EPSIN 3, transcript variant X2	XR_002303219.2	bna-miR156a	9	0.236842	1.53448e-14
XM_020823129.2	clathrin interactor EPSIN 3, transcript variant X2	XR_002303219.2	cca-miR156b	9	0.236842	1.53448e-14
XM_020823129.2	clathrin interactor EPSIN 3, transcript variant X2	XR_002303219.2	gma-miR156q	9	0.236842	1.53448e-14
XM_020823129.2	clathrin interactor EPSIN 3, transcript variant X2	XR_002303219.2	pab-miR156b	9	0.236842	1.53448e-14
XM_020823129.2	clathrin interactor EPSIN 3, transcript variant X2	XR_003701652.1	aly-miR156a-5p	10	0.526316	5.30529e-17
XM_020823129.2	clathrin interactor EPSIN 3, transcript variant X2	XR_003701652.1	bna-miR156a	10	0.526316	5.30529e-17
XM_020823129.2	clathrin interactor EPSIN 3, transcript variant X2	XR_003701652.1	cca-miR156b	10	0.526316	5.30529e-17
XM_020823129.2	clathrin interactor EPSIN 3, transcript variant X2	XR_003701652.1	gma-miR156q	10	0.526316	5.30529e-17
XM_020823129.2	clathrin interactor EPSIN 3, transcript variant X2	XR_003701652.1	mtr-miR156j	10	0.526316	5.30529e-17
XM_020823129.2	clathrin interactor EPSIN 3, transcript variant X2	XR_003701652.1	pab-miR156b	10	0.526316	5.30529e-17
XM_020823129.2	clathrin interactor EPSIN 3, transcript variant X2	XR_003702334.1	aly-miR156a-5p	8	0.421053	2.57825e-12
XM_020823129.2	clathrin interactor EPSIN 3, transcript variant X2	XR_003702334.1	aly-miR156g-5p	8	0.421053	2.57825e-12
XM_020823129.2	clathrin interactor EPSIN 3, transcript variant X2	XR_003702334.1	bna-miR156a	8	0.421053	2.57825e-12
XM_020823129.2	clathrin interactor EPSIN 3, transcript variant X2	XR_003702334.1	cca-miR156b	8	0.421053	2.57825e-12
XM_020823129.2	clathrin interactor EPSIN 3, transcript variant X2	XR_003702334.1	gma-miR156q	8	0.421053	2.57825e-12
XM_020823129.2	clathrin interactor EPSIN 3, transcript variant X2	XR_003702334.1	pab-miR156b	8	0.421053	2.57825e-12
XM_020823165.2	uncharacterized LOC110096986	XR_002305298.2	csi-miR159c-3p	3	0.176471	1.66495e-08
XM_020823165.2	uncharacterized LOC110096986	XR_002305298.2	ppt-miR319a	3	0.176471	1.66495e-08
XM_020823235.2	GABA transporter 1	TCONS_00005590	aly-miR159c-3p	6	0.545455	1.92363e-07
XM_020823235.2	GABA transporter 1	TCONS_00031314	aly-miR159c-3p	5	0.263158	5.6051e-06
XM_020823235.2	GABA transporter 1	XR_002303623.2	aly-miR159c-3p	3	0.115385	0.00168634
XM_020823235.2	GABA transporter 1	XR_002303625.2	aly-miR159c-3p	3	0.115385	0.00168634
XM_020823235.2	GABA transporter 1	XR_003701426.1	aau-miR319	12	0.428571	1.08158e-19
XM_020823235.2	GABA transporter 1	XR_003701426.1	aly-miR159c-3p	12	0.428571	1.08158e-19
XM_020823235.2	GABA transporter 1	XR_003701426.1	aly-miR319c-3p	12	0.428571	1.08158e-19
XM_020823235.2	GABA transporter 1	XR_003701426.1	atr-miR319a	12	0.428571	1.08158e-19
XM_020823235.2	GABA transporter 1	XR_003701426.1	cme-miR319c	12	0.428571	1.08158e-19
XM_020823235.2	GABA transporter 1	XR_003701426.1	gma-miR319g	12	0.428571	1.08158e-19
XM_020823235.2	GABA transporter 1	XR_003701426.1	mtr-miR319c-3p	12	0.428571	1.08158e-19
XM_020823235.2	GABA transporter 1	XR_003701426.1	pta-miR319	12	0.428571	1.08158e-19
XM_020823235.2	GABA transporter 1	XR_003702492.1	aly-miR159c-3p	3	0.115385	0.00168634
XM_020823235.2	GABA transporter 1	XR_003702493.1	aly-miR159c-3p	3	0.115385	0.00168634
XM_020823289.2	E3 ubiquitin-protein ligase SINAT5, transcript variant X1	XR_003700958.1	NW_021390876.1_12379	5	0.555556	5.23294e-12
XM_020823414.2	cytochrome P450 84A1	TCONS_00005590	aly-miR159c-3p	5	0.454545	5.5869e-05
XM_020823414.2	cytochrome P450 84A1	TCONS_00005590	bdi-miR159b-3p.1	5	0.454545	5.5869e-05
XM_020823414.2	cytochrome P450 84A1	TCONS_00031314	aly-miR159c-3p	5	0.263158	5.5869e-05
XM_020823414.2	cytochrome P450 84A1	TCONS_00031314	bdi-miR159b-3p.1	5	0.263158	5.5869e-05
XM_020823414.2	cytochrome P450 84A1	TCONS_00032841	aly-miR159c-3p	15	0.555556	1.43704e-23
XM_020823414.2	cytochrome P450 84A1	TCONS_00032841	bdi-miR159a-3p	15	0.555556	1.43704e-23
XM_020823414.2	cytochrome P450 84A1	TCONS_00032841	bdi-miR159b-3p.1	15	0.555556	1.43704e-23
XM_020823414.2	cytochrome P450 84A1	TCONS_00032841	cme-miR159b	15	0.555556	1.43704e-23
XM_020823414.2	cytochrome P450 84A1	TCONS_00032841	cpa-miR159b	15	0.555556	1.43704e-23
XM_020823414.2	cytochrome P450 84A1	TCONS_00032841	fve-miR159c	15	0.555556	1.43704e-23
XM_020823414.2	cytochrome P450 84A1	TCONS_00032841	osa-miR159d	15	0.555556	1.43704e-23
XM_020823414.2	cytochrome P450 84A1	TCONS_00032841	osa-miR159f	15	0.555556	1.43704e-23
XM_020823414.2	cytochrome P450 84A1	TCONS_00032841	pta-miR159a	15	0.555556	1.43704e-23
XM_020823414.2	cytochrome P450 84A1	TCONS_00032841	pta-miR159c	15	0.555556	1.43704e-23
XM_020823414.2	cytochrome P450 84A1	TCONS_00032841	ptc-miR159d	15	0.555556	1.43704e-23
XM_020823414.2	cytochrome P450 84A1	TCONS_00032842	aly-miR159c-3p	15	0.483871	1.43704e-23
XM_020823414.2	cytochrome P450 84A1	TCONS_00032842	bdi-miR159a-3p	15	0.483871	1.43704e-23
XM_020823414.2	cytochrome P450 84A1	TCONS_00032842	bdi-miR159b-3p.1	15	0.483871	1.43704e-23
XM_020823414.2	cytochrome P450 84A1	TCONS_00032842	cme-miR159b	15	0.483871	1.43704e-23
XM_020823414.2	cytochrome P450 84A1	TCONS_00032842	cpa-miR159b	15	0.483871	1.43704e-23
XM_020823414.2	cytochrome P450 84A1	TCONS_00032842	fve-miR159c	15	0.483871	1.43704e-23
XM_020823414.2	cytochrome P450 84A1	TCONS_00032842	osa-miR159d	15	0.483871	1.43704e-23
XM_020823414.2	cytochrome P450 84A1	TCONS_00032842	osa-miR159f	15	0.483871	1.43704e-23
XM_020823414.2	cytochrome P450 84A1	TCONS_00032842	pta-miR159a	15	0.483871	1.43704e-23
XM_020823414.2	cytochrome P450 84A1	TCONS_00032842	pta-miR159c	15	0.483871	1.43704e-23
XM_020823414.2	cytochrome P450 84A1	TCONS_00032842	ptc-miR159d	15	0.483871	1.43704e-23
XM_020823414.2	cytochrome P450 84A1	TCONS_00037662	cme-miR159b	7	0.5	1.43e-07
XM_020823414.2	cytochrome P450 84A1	TCONS_00037662	fve-miR159c	7	0.5	1.43e-07
XM_020823414.2	cytochrome P450 84A1	TCONS_00037662	osa-miR159c	7	0.5	1.43e-07
XM_020823414.2	cytochrome P450 84A1	TCONS_00037662	osa-miR159d	7	0.5	1.43e-07
XM_020823414.2	cytochrome P450 84A1	TCONS_00037662	pta-miR159a	7	0.5	1.43e-07
XM_020823414.2	cytochrome P450 84A1	XR_002303623.2	aly-miR159c-3p	5	0.192308	5.5869e-05
XM_020823414.2	cytochrome P450 84A1	XR_002303623.2	bdi-miR159b-3p.1	5	0.192308	5.5869e-05
XM_020823414.2	cytochrome P450 84A1	XR_002303625.2	aly-miR159c-3p	5	0.192308	5.5869e-05
XM_020823414.2	cytochrome P450 84A1	XR_002303625.2	bdi-miR159b-3p.1	5	0.192308	5.5869e-05
XM_020823414.2	cytochrome P450 84A1	XR_002305298.2	bdi-miR159a-3p	5	0.294118	5.5869e-05
XM_020823414.2	cytochrome P450 84A1	XR_002305298.2	cpa-miR159b	5	0.294118	5.5869e-05
XM_020823414.2	cytochrome P450 84A1	XR_002305298.2	osa-miR159f	5	0.294118	5.5869e-05
XM_020823414.2	cytochrome P450 84A1	XR_002305298.2	pta-miR159c	5	0.294118	5.5869e-05
XM_020823414.2	cytochrome P450 84A1	XR_002305298.2	ptc-miR159d	5	0.294118	5.5869e-05
XM_020823414.2	cytochrome P450 84A1	XR_003701426.1	aly-miR159c-3p	5	0.178571	5.5869e-05
XM_020823414.2	cytochrome P450 84A1	XR_003701426.1	bdi-miR159b-3p.1	5	0.178571	5.5869e-05
XM_020823414.2	cytochrome P450 84A1	XR_003702492.1	aly-miR159c-3p	5	0.192308	5.5869e-05
XM_020823414.2	cytochrome P450 84A1	XR_003702492.1	bdi-miR159b-3p.1	5	0.192308	5.5869e-05
XM_020823414.2	cytochrome P450 84A1	XR_003702493.1	aly-miR159c-3p	5	0.192308	5.5869e-05
XM_020823414.2	cytochrome P450 84A1	XR_003702493.1	bdi-miR159b-3p.1	5	0.192308	5.5869e-05
XM_020823414.2	cytochrome P450 84A1	XR_003702767.1	cme-miR159b	5	0.138889	5.5869e-05
XM_020823414.2	cytochrome P450 84A1	XR_003702767.1	fve-miR159c	5	0.138889	5.5869e-05
XM_020823414.2	cytochrome P450 84A1	XR_003702767.1	osa-miR159c	5	0.138889	5.5869e-05
XM_020823414.2	cytochrome P450 84A1	XR_003702767.1	osa-miR159d	5	0.138889	5.5869e-05
XM_020823535.2	metal tolerance protein 4-like, transcript variant X2	TCONS_00025990	eun-miR395-3p	3	0.25	8.03797e-07
XM_020823535.2	metal tolerance protein 4-like, transcript variant X2	XR_002304634.2	eun-miR395-3p	4	0.235294	3.37151e-09
XM_020823535.2	metal tolerance protein 4-like, transcript variant X2	XR_003700116.1	eun-miR395-3p	3	0.12	8.03797e-07
XM_020823579.2	ATP sulfurylase 1, chloroplastic	TCONS_00010551	aof-miR395a	4	1	0.000115918
XM_020823579.2	ATP sulfurylase 1, chloroplastic	TCONS_00010551	osa-miR395b	4	1	0.000115918
XM_020823579.2	ATP sulfurylase 1, chloroplastic	TCONS_00023661	aly-miR395d-3p	7	0.318182	4.68113e-09
XM_020823579.2	ATP sulfurylase 1, chloroplastic	TCONS_00023661	cme-miR395b	7	0.318182	4.68113e-09
XM_020823579.2	ATP sulfurylase 1, chloroplastic	TCONS_00023661	sly-miR395a	7	0.318182	4.68113e-09
XM_020823579.2	ATP sulfurylase 1, chloroplastic	TCONS_00023668	aof-miR395a	6	1	1.92363e-07
XM_020823579.2	ATP sulfurylase 1, chloroplastic	TCONS_00023668	ata-miR395e-3p	6	1	1.92363e-07
XM_020823579.2	ATP sulfurylase 1, chloroplastic	TCONS_00023668	eun-miR395-3p	6	1	1.92363e-07
XM_020823579.2	ATP sulfurylase 1, chloroplastic	TCONS_00024832	aly-miR395d-3p	11	0.916667	3.67849e-17
XM_020823579.2	ATP sulfurylase 1, chloroplastic	TCONS_00024832	ata-miR395e-3p	11	0.916667	3.67849e-17
XM_020823579.2	ATP sulfurylase 1, chloroplastic	TCONS_00024832	cme-miR395b	11	0.916667	3.67849e-17
XM_020823579.2	ATP sulfurylase 1, chloroplastic	TCONS_00024832	eun-miR395-3p	11	0.916667	3.67849e-17
XM_020823579.2	ATP sulfurylase 1, chloroplastic	TCONS_00024832	sly-miR395a	11	0.916667	3.67849e-17
XM_020823579.2	ATP sulfurylase 1, chloroplastic	TCONS_00025156	aly-miR395d-3p	5	1	5.6051e-06
XM_020823579.2	ATP sulfurylase 1, chloroplastic	TCONS_00025156	mdm-miR395l	5	1	5.6051e-06
XM_020823579.2	ATP sulfurylase 1, chloroplastic	TCONS_00025156	sly-miR395a	5	1	5.6051e-06
XM_020823579.2	ATP sulfurylase 1, chloroplastic	TCONS_00025990	aly-miR395d-3p	12	1	1.08158e-19
XM_020823579.2	ATP sulfurylase 1, chloroplastic	TCONS_00025990	aof-miR395a	12	1	1.08158e-19
XM_020823579.2	ATP sulfurylase 1, chloroplastic	TCONS_00025990	ata-miR395e-3p	12	1	1.08158e-19
XM_020823579.2	ATP sulfurylase 1, chloroplastic	TCONS_00025990	cme-miR395b	12	1	1.08158e-19
XM_020823579.2	ATP sulfurylase 1, chloroplastic	TCONS_00025990	eun-miR395-3p	12	1	1.08158e-19
XM_020823579.2	ATP sulfurylase 1, chloroplastic	TCONS_00025990	mdm-miR395l	12	1	1.08158e-19
XM_020823579.2	ATP sulfurylase 1, chloroplastic	TCONS_00025990	osa-miR395b	12	1	1.08158e-19
XM_020823579.2	ATP sulfurylase 1, chloroplastic	TCONS_00025990	sly-miR395a	12	1	1.08158e-19
XM_020823579.2	ATP sulfurylase 1, chloroplastic	TCONS_00032470	aly-miR395d-3p	8	0.8	7.99727e-11
XM_020823579.2	ATP sulfurylase 1, chloroplastic	TCONS_00032470	aof-miR395a	8	0.8	7.99727e-11
XM_020823579.2	ATP sulfurylase 1, chloroplastic	TCONS_00032470	ata-miR395e-3p	8	0.8	7.99727e-11
XM_020823579.2	ATP sulfurylase 1, chloroplastic	TCONS_00032470	sly-miR395a	8	0.8	7.99727e-11
XM_020823579.2	ATP sulfurylase 1, chloroplastic	XR_002303785.2	ata-miR395e-3p	3	0.75	0.00168634
XM_020823579.2	ATP sulfurylase 1, chloroplastic	XR_002304634.2	eun-miR395-3p	5	0.294118	5.6051e-06
XM_020823579.2	ATP sulfurylase 1, chloroplastic	XR_003700116.1	eun-miR395-3p	4	0.16	0.000115918
XM_020823579.2	ATP sulfurylase 1, chloroplastic	XR_003701379.1	aly-miR395d-3p	11	0.785714	3.67849e-17
XM_020823579.2	ATP sulfurylase 1, chloroplastic	XR_003701379.1	cme-miR395b	11	0.785714	3.67849e-17
XM_020823579.2	ATP sulfurylase 1, chloroplastic	XR_003701379.1	eun-miR395-3p	11	0.785714	3.67849e-17
XM_020823579.2	ATP sulfurylase 1, chloroplastic	XR_003701379.1	mdm-miR395l	11	0.785714	3.67849e-17
XM_020823579.2	ATP sulfurylase 1, chloroplastic	XR_003701379.1	osa-miR395b	11	0.785714	3.67849e-17
XM_020823579.2	ATP sulfurylase 1, chloroplastic	XR_003701379.1	sly-miR395a	11	0.785714	3.67849e-17
XM_020823579.2	ATP sulfurylase 1, chloroplastic	XR_003701381.1	aly-miR395d-3p	11	0.785714	3.67849e-17
XM_020823579.2	ATP sulfurylase 1, chloroplastic	XR_003701381.1	cme-miR395b	11	0.785714	3.67849e-17
XM_020823579.2	ATP sulfurylase 1, chloroplastic	XR_003701381.1	eun-miR395-3p	11	0.785714	3.67849e-17
XM_020823579.2	ATP sulfurylase 1, chloroplastic	XR_003701381.1	mdm-miR395l	11	0.785714	3.67849e-17
XM_020823579.2	ATP sulfurylase 1, chloroplastic	XR_003701381.1	osa-miR395b	11	0.785714	3.67849e-17
XM_020823579.2	ATP sulfurylase 1, chloroplastic	XR_003701381.1	sly-miR395a	11	0.785714	3.67849e-17
XM_020823579.2	ATP sulfurylase 1, chloroplastic	XR_003703321.1	aly-miR395d-3p	4	1	0.000115918
XM_020823579.2	ATP sulfurylase 1, chloroplastic	XR_003703321.1	sly-miR395a	4	1	0.000115918
XM_020823787.2	receptor protein kinase-like protein ZAR1	XR_003702439.1	mes-miR166i	7	0.212121	1.69239e-07
XM_020823787.2	receptor protein kinase-like protein ZAR1	XR_003702439.1	pab-miR166j	7	0.212121	1.69239e-07
XM_020823787.2	receptor protein kinase-like protein ZAR1	XR_003703327.1	bdi-miR166e-3p	4	0.235294	0.00084195
XM_020823795.2	uncharacterized LOC110097428, transcript variant X1	TCONS_00017087	lus-miR159b	5	0.294118	1.07007e-13
XM_020823795.2	uncharacterized LOC110097428, transcript variant X1	XR_002302757.2	ahy-miR159	5	0.238095	1.07007e-13
XM_020823795.2	uncharacterized LOC110097428, transcript variant X1	XR_002302757.2	lus-miR159b	5	0.238095	1.07007e-13
XM_020823962.2	DEAD-box ATP-dependent RNA helicase FANCM, transcript variant X2	TCONS_00000917	aly-miR168a-5p	7	0.7	0
XM_020823962.2	DEAD-box ATP-dependent RNA helicase FANCM, transcript variant X2	TCONS_00000917	bra-miR168b-5p	7	0.7	0
XM_020823962.2	DEAD-box ATP-dependent RNA helicase FANCM, transcript variant X2	TCONS_00000917	lja-miR168-5p	7	0.7	0
XM_020823962.2	DEAD-box ATP-dependent RNA helicase FANCM, transcript variant X2	XR_003703113.1	aly-miR168a-5p	7	0.538462	0
XM_020823962.2	DEAD-box ATP-dependent RNA helicase FANCM, transcript variant X2	XR_003703113.1	bra-miR168b-5p	7	0.538462	0
XM_020823962.2	DEAD-box ATP-dependent RNA helicase FANCM, transcript variant X2	XR_003703113.1	lja-miR168-5p	7	0.538462	0
XM_020823999.2	cyclopropane-fatty-acyl-phospholipid synthase, transcript variant X1	TCONS_00032841	aly-miR156a-5p	6	0.222222	3.41948e-08
XM_020823999.2	cyclopropane-fatty-acyl-phospholipid synthase, transcript variant X1	TCONS_00032841	bna-miR156a	6	0.222222	3.41948e-08
XM_020823999.2	cyclopropane-fatty-acyl-phospholipid synthase, transcript variant X1	TCONS_00032841	cca-miR156b	6	0.222222	3.41948e-08
XM_020823999.2	cyclopropane-fatty-acyl-phospholipid synthase, transcript variant X1	TCONS_00032841	gma-miR156q	6	0.222222	3.41948e-08
XM_020823999.2	cyclopropane-fatty-acyl-phospholipid synthase, transcript variant X1	TCONS_00032841	sly-miR156e-5p	6	0.222222	3.41948e-08
XM_020823999.2	cyclopropane-fatty-acyl-phospholipid synthase, transcript variant X1	TCONS_00032842	aly-miR156a-5p	6	0.193548	3.41948e-08
XM_020823999.2	cyclopropane-fatty-acyl-phospholipid synthase, transcript variant X1	TCONS_00032842	bna-miR156a	6	0.193548	3.41948e-08
XM_020823999.2	cyclopropane-fatty-acyl-phospholipid synthase, transcript variant X1	TCONS_00032842	cca-miR156b	6	0.193548	3.41948e-08
XM_020823999.2	cyclopropane-fatty-acyl-phospholipid synthase, transcript variant X1	TCONS_00032842	gma-miR156q	6	0.193548	3.41948e-08
XM_020823999.2	cyclopropane-fatty-acyl-phospholipid synthase, transcript variant X1	TCONS_00032842	sly-miR156e-5p	6	0.193548	3.41948e-08
XM_020823999.2	cyclopropane-fatty-acyl-phospholipid synthase, transcript variant X1	XR_002303219.2	aly-miR156a-5p	7	0.184211	5.72143e-10
XM_020823999.2	cyclopropane-fatty-acyl-phospholipid synthase, transcript variant X1	XR_002303219.2	bna-miR156a	7	0.184211	5.72143e-10
XM_020823999.2	cyclopropane-fatty-acyl-phospholipid synthase, transcript variant X1	XR_002303219.2	cca-miR156b	7	0.184211	5.72143e-10
XM_020823999.2	cyclopropane-fatty-acyl-phospholipid synthase, transcript variant X1	XR_002303219.2	gma-miR156q	7	0.184211	5.72143e-10
XM_020823999.2	cyclopropane-fatty-acyl-phospholipid synthase, transcript variant X1	XR_002303219.2	pab-miR156b	7	0.184211	5.72143e-10
XM_020823999.2	cyclopropane-fatty-acyl-phospholipid synthase, transcript variant X1	XR_003701652.1	aly-miR156a-5p	9	0.473684	4.56392e-14
XM_020823999.2	cyclopropane-fatty-acyl-phospholipid synthase, transcript variant X1	XR_003701652.1	bna-miR156a	9	0.473684	4.56392e-14
XM_020823999.2	cyclopropane-fatty-acyl-phospholipid synthase, transcript variant X1	XR_003701652.1	cca-miR156b	9	0.473684	4.56392e-14
XM_020823999.2	cyclopropane-fatty-acyl-phospholipid synthase, transcript variant X1	XR_003701652.1	gma-miR156q	9	0.473684	4.56392e-14
XM_020823999.2	cyclopropane-fatty-acyl-phospholipid synthase, transcript variant X1	XR_003701652.1	mtr-miR156j	9	0.473684	4.56392e-14
XM_020823999.2	cyclopropane-fatty-acyl-phospholipid synthase, transcript variant X1	XR_003701652.1	pab-miR156b	9	0.473684	4.56392e-14
XM_020823999.2	cyclopropane-fatty-acyl-phospholipid synthase, transcript variant X1	XR_003702334.1	aly-miR156a-5p	5	0.263158	1.39078e-06
XM_020823999.2	cyclopropane-fatty-acyl-phospholipid synthase, transcript variant X1	XR_003702334.1	bna-miR156a	5	0.263158	1.39078e-06
XM_020823999.2	cyclopropane-fatty-acyl-phospholipid synthase, transcript variant X1	XR_003702334.1	cca-miR156b	5	0.263158	1.39078e-06
XM_020823999.2	cyclopropane-fatty-acyl-phospholipid synthase, transcript variant X1	XR_003702334.1	gma-miR156q	5	0.263158	1.39078e-06
XM_020823999.2	cyclopropane-fatty-acyl-phospholipid synthase, transcript variant X1	XR_003702334.1	pab-miR156b	5	0.263158	1.39078e-06
XM_020823999.2	cyclopropane-fatty-acyl-phospholipid synthase, transcript variant X1	XR_003702767.1	aly-miR156a-5p	6	0.166667	3.41948e-08
XM_020823999.2	cyclopropane-fatty-acyl-phospholipid synthase, transcript variant X1	XR_003702767.1	bna-miR156a	6	0.166667	3.41948e-08
XM_020823999.2	cyclopropane-fatty-acyl-phospholipid synthase, transcript variant X1	XR_003702767.1	cca-miR156b	6	0.166667	3.41948e-08
XM_020823999.2	cyclopropane-fatty-acyl-phospholipid synthase, transcript variant X1	XR_003702767.1	gma-miR156q	6	0.166667	3.41948e-08
XM_020823999.2	cyclopropane-fatty-acyl-phospholipid synthase, transcript variant X1	XR_003702767.1	sly-miR156e-5p	6	0.166667	3.41948e-08
XM_020824009.2	homeobox protein BEL1 homolog	TCONS_00000010	ahy-miR156c	3	0.3	3.17353e-06
XM_020824009.2	homeobox protein BEL1 homolog	TCONS_00029329	ahy-miR156c	3	0.375	3.17353e-06
XM_020824009.2	homeobox protein BEL1 homolog	TCONS_00029329	bcy-miR156	3	0.375	3.17353e-06
XM_020824009.2	homeobox protein BEL1 homolog	TCONS_00033747	ahy-miR156c	5	0.3125	8.32271e-11
XM_020824009.2	homeobox protein BEL1 homolog	TCONS_00033747	bcy-miR156	5	0.3125	8.32271e-11
XM_020824009.2	homeobox protein BEL1 homolog	TCONS_00036429	ahy-miR156c	4	0.285714	2.37436e-08
XM_020824009.2	homeobox protein BEL1 homolog	TCONS_00036429	sly-miR156e-5p	4	0.285714	2.37436e-08
XM_020824009.2	homeobox protein BEL1 homolog	XR_003699864.1	ahy-miR156c	4	0.666667	2.37436e-08
XM_020824009.2	homeobox protein BEL1 homolog	XR_003699864.1	bcy-miR156	4	0.666667	2.37436e-08
XM_020824009.2	homeobox protein BEL1 homolog	XR_003701135.1	ahy-miR156c	4	0.4	2.37436e-08
XM_020824484.2	ABC transporter G family member 42	TCONS_00017098	aqc-miR172b	5	0.357143	2.27592e-06
XM_020824484.2	ABC transporter G family member 42	XR_003701328.1	NW_021390876.1_12379	3	0.0447761	0.000990661
XM_020824484.2	ABC transporter G family member 42	XR_003703327.1	NW_021390876.1_12379	3	0.176471	0.000990661
XM_020824535.2	disease resistance protein RGA2-like	TCONS_00005590	aly-miR159c-3p	5	0.454545	0.000146725
XM_020824535.2	disease resistance protein RGA2-like	TCONS_00005590	bdi-miR159b-3p.1	5	0.454545	0.000146725
XM_020824535.2	disease resistance protein RGA2-like	TCONS_00031314	aly-miR159c-3p	6	0.315789	1.07198e-05
XM_020824535.2	disease resistance protein RGA2-like	TCONS_00031314	bdi-miR159b-3p.1	6	0.315789	1.07198e-05
XM_020824535.2	disease resistance protein RGA2-like	TCONS_00032841	aly-miR159c-3p	15	0.555556	1.47182e-21
XM_020824535.2	disease resistance protein RGA2-like	TCONS_00032841	bdi-miR159a-3p	15	0.555556	1.47182e-21
XM_020824535.2	disease resistance protein RGA2-like	TCONS_00032841	bdi-miR159b-3p.1	15	0.555556	1.47182e-21
XM_020824535.2	disease resistance protein RGA2-like	TCONS_00032841	cme-miR159b	15	0.555556	1.47182e-21
XM_020824535.2	disease resistance protein RGA2-like	TCONS_00032841	cpa-miR159b	15	0.555556	1.47182e-21
XM_020824535.2	disease resistance protein RGA2-like	TCONS_00032841	fve-miR159c	15	0.555556	1.47182e-21
XM_020824535.2	disease resistance protein RGA2-like	TCONS_00032841	osa-miR159d	15	0.555556	1.47182e-21
XM_020824535.2	disease resistance protein RGA2-like	TCONS_00032841	osa-miR159f	15	0.555556	1.47182e-21
XM_020824535.2	disease resistance protein RGA2-like	TCONS_00032841	pta-miR159a	15	0.555556	1.47182e-21
XM_020824535.2	disease resistance protein RGA2-like	TCONS_00032841	pta-miR159c	15	0.555556	1.47182e-21
XM_020824535.2	disease resistance protein RGA2-like	TCONS_00032841	ptc-miR159d	15	0.555556	1.47182e-21
XM_020824535.2	disease resistance protein RGA2-like	TCONS_00032842	aly-miR159c-3p	15	0.483871	1.47182e-21
XM_020824535.2	disease resistance protein RGA2-like	TCONS_00032842	bdi-miR159a-3p	15	0.483871	1.47182e-21
XM_020824535.2	disease resistance protein RGA2-like	TCONS_00032842	bdi-miR159b-3p.1	15	0.483871	1.47182e-21
XM_020824535.2	disease resistance protein RGA2-like	TCONS_00032842	cme-miR159b	15	0.483871	1.47182e-21
XM_020824535.2	disease resistance protein RGA2-like	TCONS_00032842	cpa-miR159b	15	0.483871	1.47182e-21
XM_020824535.2	disease resistance protein RGA2-like	TCONS_00032842	fve-miR159c	15	0.483871	1.47182e-21
XM_020824535.2	disease resistance protein RGA2-like	TCONS_00032842	osa-miR159d	15	0.483871	1.47182e-21
XM_020824535.2	disease resistance protein RGA2-like	TCONS_00032842	osa-miR159f	15	0.483871	1.47182e-21
XM_020824535.2	disease resistance protein RGA2-like	TCONS_00032842	pta-miR159a	15	0.483871	1.47182e-21
XM_020824535.2	disease resistance protein RGA2-like	TCONS_00032842	pta-miR159c	15	0.483871	1.47182e-21
XM_020824535.2	disease resistance protein RGA2-like	TCONS_00032842	ptc-miR159d	15	0.483871	1.47182e-21
XM_020824535.2	disease resistance protein RGA2-like	TCONS_00037662	cme-miR159b	6	0.428571	1.07198e-05
XM_020824535.2	disease resistance protein RGA2-like	TCONS_00037662	fve-miR159c	6	0.428571	1.07198e-05
XM_020824535.2	disease resistance protein RGA2-like	TCONS_00037662	osa-miR159c	6	0.428571	1.07198e-05
XM_020824535.2	disease resistance protein RGA2-like	TCONS_00037662	osa-miR159d	6	0.428571	1.07198e-05
XM_020824535.2	disease resistance protein RGA2-like	TCONS_00037662	pta-miR159a	6	0.428571	1.07198e-05
XM_020824535.2	disease resistance protein RGA2-like	XR_002303623.2	aly-miR159c-3p	5	0.192308	0.000146725
XM_020824535.2	disease resistance protein RGA2-like	XR_002303623.2	bdi-miR159b-3p.1	5	0.192308	0.000146725
XM_020824535.2	disease resistance protein RGA2-like	XR_002303625.2	aly-miR159c-3p	5	0.192308	0.000146725
XM_020824535.2	disease resistance protein RGA2-like	XR_002303625.2	bdi-miR159b-3p.1	5	0.192308	0.000146725
XM_020824535.2	disease resistance protein RGA2-like	XR_002305298.2	bdi-miR159a-3p	6	0.352941	1.07198e-05
XM_020824535.2	disease resistance protein RGA2-like	XR_002305298.2	cpa-miR159b	6	0.352941	1.07198e-05
XM_020824535.2	disease resistance protein RGA2-like	XR_002305298.2	osa-miR159f	6	0.352941	1.07198e-05
XM_020824535.2	disease resistance protein RGA2-like	XR_002305298.2	pta-miR159c	6	0.352941	1.07198e-05
XM_020824535.2	disease resistance protein RGA2-like	XR_002305298.2	ptc-miR159d	6	0.352941	1.07198e-05
XM_020824535.2	disease resistance protein RGA2-like	XR_003701426.1	aly-miR159c-3p	6	0.214286	1.07198e-05
XM_020824535.2	disease resistance protein RGA2-like	XR_003701426.1	bdi-miR159b-3p.1	6	0.214286	1.07198e-05
XM_020824535.2	disease resistance protein RGA2-like	XR_003701426.1	cpa-miR319	6	0.214286	1.07198e-05
XM_020824535.2	disease resistance protein RGA2-like	XR_003702492.1	aly-miR159c-3p	5	0.192308	0.000146725
XM_020824535.2	disease resistance protein RGA2-like	XR_003702492.1	bdi-miR159b-3p.1	5	0.192308	0.000146725
XM_020824535.2	disease resistance protein RGA2-like	XR_003702493.1	aly-miR159c-3p	5	0.192308	0.000146725
XM_020824535.2	disease resistance protein RGA2-like	XR_003702493.1	bdi-miR159b-3p.1	5	0.192308	0.000146725
XM_020824535.2	disease resistance protein RGA2-like	XR_003702767.1	cme-miR159b	7	0.194444	5.95342e-07
XM_020824535.2	disease resistance protein RGA2-like	XR_003702767.1	cpa-miR319	7	0.194444	5.95342e-07
XM_020824535.2	disease resistance protein RGA2-like	XR_003702767.1	fve-miR159c	7	0.194444	5.95342e-07
XM_020824535.2	disease resistance protein RGA2-like	XR_003702767.1	osa-miR159c	7	0.194444	5.95342e-07
XM_020824535.2	disease resistance protein RGA2-like	XR_003702767.1	osa-miR159d	7	0.194444	5.95342e-07
XM_020824570.2	dihydroxy-acid dehydratase, chloroplastic, transcript variant X1	TCONS_00027061	aly-miR171a-3p	3	1	0.0109509
XM_020824570.2	dihydroxy-acid dehydratase, chloroplastic, transcript variant X1	TCONS_00027061	bna-miR171g	3	1	0.0109509
XM_020824645.2	protein RETICULATA-RELATED 4, chloroplastic	TCONS_00023661	ata-miR169h-5p	14	0.636364	1.05215e-25
XM_020824645.2	protein RETICULATA-RELATED 4, chloroplastic	TCONS_00023661	cca-miR169a	14	0.636364	1.05215e-25
XM_020824810.2	mannosylglycoprotein endo-beta-mannosidase, transcript variant X3	TCONS_00000917	aly-miR168a-5p	7	0.7	1.61099e-08
XM_020824810.2	mannosylglycoprotein endo-beta-mannosidase, transcript variant X3	TCONS_00000917	bra-miR168b-5p	7	0.7	1.61099e-08
XM_020824810.2	mannosylglycoprotein endo-beta-mannosidase, transcript variant X3	TCONS_00000917	lja-miR168-5p	7	0.7	1.61099e-08
XM_020824810.2	mannosylglycoprotein endo-beta-mannosidase, transcript variant X3	XR_003703113.1	aly-miR168a-5p	7	0.538462	1.61099e-08
XM_020824810.2	mannosylglycoprotein endo-beta-mannosidase, transcript variant X3	XR_003703113.1	bra-miR168b-5p	7	0.538462	1.61099e-08
XM_020824810.2	mannosylglycoprotein endo-beta-mannosidase, transcript variant X3	XR_003703113.1	lja-miR168-5p	7	0.538462	1.61099e-08
XM_020824846.2	uncharacterized LOC110098123, transcript variant X1	TCONS_00005590	aly-miR159c-3p	3	0.272727	0.0002931
XM_020824846.2	uncharacterized LOC110098123, transcript variant X1	TCONS_00005590	bdi-miR159b-3p.1	3	0.272727	0.0002931
XM_020824846.2	uncharacterized LOC110098123, transcript variant X1	TCONS_00031314	aly-miR159c-3p	3	0.157895	0.0002931
XM_020824846.2	uncharacterized LOC110098123, transcript variant X1	TCONS_00031314	bdi-miR159b-3p.1	3	0.157895	0.0002931
XM_020824846.2	uncharacterized LOC110098123, transcript variant X1	TCONS_00032841	aly-miR159c-3p	5	0.185185	2.855e-07
XM_020824846.2	uncharacterized LOC110098123, transcript variant X1	TCONS_00032841	bdi-miR159b-3p.1	5	0.185185	2.855e-07
XM_020824846.2	uncharacterized LOC110098123, transcript variant X1	TCONS_00032841	pta-miR159a	5	0.185185	2.855e-07
XM_020824846.2	uncharacterized LOC110098123, transcript variant X1	TCONS_00032842	aly-miR159c-3p	5	0.16129	2.855e-07
XM_020824846.2	uncharacterized LOC110098123, transcript variant X1	TCONS_00032842	bdi-miR159b-3p.1	5	0.16129	2.855e-07
XM_020824846.2	uncharacterized LOC110098123, transcript variant X1	TCONS_00032842	pta-miR159a	5	0.16129	2.855e-07
XM_020824846.2	uncharacterized LOC110098123, transcript variant X1	XR_002303623.2	aly-miR159c-3p	3	0.115385	0.0002931
XM_020824846.2	uncharacterized LOC110098123, transcript variant X1	XR_002303623.2	bdi-miR159b-3p.1	3	0.115385	0.0002931
XM_020824846.2	uncharacterized LOC110098123, transcript variant X1	XR_002303625.2	aly-miR159c-3p	3	0.115385	0.0002931
XM_020824846.2	uncharacterized LOC110098123, transcript variant X1	XR_002303625.2	bdi-miR159b-3p.1	3	0.115385	0.0002931
XM_020824846.2	uncharacterized LOC110098123, transcript variant X1	XR_003701426.1	aly-miR159c-3p	4	0.142857	1.1261e-05
XM_020824846.2	uncharacterized LOC110098123, transcript variant X1	XR_003701426.1	bdi-miR159b-3p.1	4	0.142857	1.1261e-05
XM_020824846.2	uncharacterized LOC110098123, transcript variant X1	XR_003702492.1	aly-miR159c-3p	3	0.115385	0.0002931
XM_020824846.2	uncharacterized LOC110098123, transcript variant X1	XR_003702492.1	bdi-miR159b-3p.1	3	0.115385	0.0002931
XM_020824846.2	uncharacterized LOC110098123, transcript variant X1	XR_003702493.1	aly-miR159c-3p	3	0.115385	0.0002931
XM_020824846.2	uncharacterized LOC110098123, transcript variant X1	XR_003702493.1	bdi-miR159b-3p.1	3	0.115385	0.0002931
XM_020824959.2	F-box protein At2g26850-like, transcript variant X1	TCONS_00000010	ahy-miR156c	5	0.5	1.07007e-13
XM_020824959.2	F-box protein At2g26850-like, transcript variant X1	TCONS_00000010	bdi-miR529-5p	5	0.5	1.07007e-13
XM_020824959.2	F-box protein At2g26850-like, transcript variant X1	TCONS_00000010	ppt-miR529e	5	0.5	1.07007e-13
XM_020824959.2	F-box protein At2g26850-like, transcript variant X1	TCONS_00010963	bdi-miR529-5p	3	1	1.49014e-07
XM_020824959.2	F-box protein At2g26850-like, transcript variant X1	TCONS_00010963	ppt-miR529e	3	1	1.49014e-07
XM_020824959.2	F-box protein At2g26850-like, transcript variant X1	TCONS_00027795	bdi-miR529-5p	3	1	1.49014e-07
XM_020824959.2	F-box protein At2g26850-like, transcript variant X1	TCONS_00027795	ppt-miR529e	3	1	1.49014e-07
XM_020824959.2	F-box protein At2g26850-like, transcript variant X1	TCONS_00032842	bdi-miR529-5p	3	0.0967742	1.49014e-07
XM_020824959.2	F-box protein At2g26850-like, transcript variant X1	TCONS_00032842	ppt-miR529e	3	0.0967742	1.49014e-07
XM_020824959.2	F-box protein At2g26850-like, transcript variant X1	TCONS_00033747	ahy-miR156c	3	0.1875	1.49014e-07
XM_020824959.2	F-box protein At2g26850-like, transcript variant X1	TCONS_00034483	ahy-miR156c	5	0.357143	1.07007e-13
XM_020824959.2	F-box protein At2g26850-like, transcript variant X1	TCONS_00034483	bdi-miR529-5p	5	0.357143	1.07007e-13
XM_020824959.2	F-box protein At2g26850-like, transcript variant X1	TCONS_00034483	ppt-miR529e	5	0.357143	1.07007e-13
XM_020824959.2	F-box protein At2g26850-like, transcript variant X1	TCONS_00035884	bdi-miR529-5p	3	0.25	1.49014e-07
XM_020824959.2	F-box protein At2g26850-like, transcript variant X1	TCONS_00035884	ppt-miR529e	3	0.25	1.49014e-07
XM_020824959.2	F-box protein At2g26850-like, transcript variant X1	TCONS_00036429	ahy-miR156c	5	0.357143	1.07007e-13
XM_020824959.2	F-box protein At2g26850-like, transcript variant X1	TCONS_00036429	bdi-miR529-5p	5	0.357143	1.07007e-13
XM_020824959.2	F-box protein At2g26850-like, transcript variant X1	TCONS_00036429	ppt-miR529e	5	0.357143	1.07007e-13
XM_020824959.2	F-box protein At2g26850-like, transcript variant X1	XR_002303623.2	bdi-miR529-5p	3	0.115385	1.49014e-07
XM_020824959.2	F-box protein At2g26850-like, transcript variant X1	XR_002303623.2	ppt-miR529e	3	0.115385	1.49014e-07
XM_020824959.2	F-box protein At2g26850-like, transcript variant X1	XR_002303625.2	bdi-miR529-5p	3	0.115385	1.49014e-07
XM_020824959.2	F-box protein At2g26850-like, transcript variant X1	XR_002303625.2	ppt-miR529e	3	0.115385	1.49014e-07
XM_020824959.2	F-box protein At2g26850-like, transcript variant X1	XR_002304893.2	bdi-miR529-5p	3	0.428571	1.49014e-07
XM_020824959.2	F-box protein At2g26850-like, transcript variant X1	XR_002304893.2	ppt-miR529e	3	0.428571	1.49014e-07
XM_020824959.2	F-box protein At2g26850-like, transcript variant X1	XR_002304993.2	bdi-miR529-5p	3	0.75	1.49014e-07
XM_020824959.2	F-box protein At2g26850-like, transcript variant X1	XR_002304993.2	ppt-miR529e	3	0.75	1.49014e-07
XM_020824959.2	F-box protein At2g26850-like, transcript variant X1	XR_002305222.2	bdi-miR529-5p	3	1	1.49014e-07
XM_020824959.2	F-box protein At2g26850-like, transcript variant X1	XR_002305222.2	ppt-miR529e	3	1	1.49014e-07
XM_020824959.2	F-box protein At2g26850-like, transcript variant X1	XR_003700878.1	bdi-miR529-5p	3	0.75	1.49014e-07
XM_020824959.2	F-box protein At2g26850-like, transcript variant X1	XR_003700878.1	ppt-miR529e	3	0.75	1.49014e-07
XM_020824959.2	F-box protein At2g26850-like, transcript variant X1	XR_003702413.1	bdi-miR529-5p	3	0.176471	1.49014e-07
XM_020824959.2	F-box protein At2g26850-like, transcript variant X1	XR_003702413.1	ppt-miR529e	3	0.176471	1.49014e-07
XM_020824959.2	F-box protein At2g26850-like, transcript variant X1	XR_003702492.1	bdi-miR529-5p	3	0.115385	1.49014e-07
XM_020824959.2	F-box protein At2g26850-like, transcript variant X1	XR_003702492.1	ppt-miR529e	3	0.115385	1.49014e-07
XM_020824959.2	F-box protein At2g26850-like, transcript variant X1	XR_003702493.1	bdi-miR529-5p	3	0.115385	1.49014e-07
XM_020824959.2	F-box protein At2g26850-like, transcript variant X1	XR_003702493.1	ppt-miR529e	3	0.115385	1.49014e-07
XM_020824959.2	F-box protein At2g26850-like, transcript variant X1	XR_003702767.1	bdi-miR529-5p	3	0.0833333	1.49014e-07
XM_020824959.2	F-box protein At2g26850-like, transcript variant X1	XR_003702767.1	ppt-miR529e	3	0.0833333	1.49014e-07
XM_020824962.2	protein RETICULATA-RELATED 3, chloroplastic	TCONS_00000071	aly-miR156g-5p	3	0.375	0.00966995
XM_020824962.2	protein RETICULATA-RELATED 3, chloroplastic	TCONS_00029329	bcy-miR156	4	0.5	0.00118814
XM_020824962.2	protein RETICULATA-RELATED 3, chloroplastic	TCONS_00029329	cme-miR156j	4	0.5	0.00118814
XM_020824962.2	protein RETICULATA-RELATED 3, chloroplastic	TCONS_00029329	fve-miR156b	4	0.5	0.00118814
XM_020824962.2	protein RETICULATA-RELATED 3, chloroplastic	TCONS_00029329	fve-miR156h	4	0.5	0.00118814
XM_020824962.2	protein RETICULATA-RELATED 3, chloroplastic	TCONS_00032841	aly-miR156a-5p	7	0.259259	3.7815e-07
XM_020824962.2	protein RETICULATA-RELATED 3, chloroplastic	TCONS_00032841	bna-miR156a	7	0.259259	3.7815e-07
XM_020824962.2	protein RETICULATA-RELATED 3, chloroplastic	TCONS_00032841	cca-miR156b	7	0.259259	3.7815e-07
XM_020824962.2	protein RETICULATA-RELATED 3, chloroplastic	TCONS_00032841	gma-miR156q	7	0.259259	3.7815e-07
XM_020824962.2	protein RETICULATA-RELATED 3, chloroplastic	TCONS_00032842	aly-miR156a-5p	7	0.225806	3.7815e-07
XM_020824962.2	protein RETICULATA-RELATED 3, chloroplastic	TCONS_00032842	bna-miR156a	7	0.225806	3.7815e-07
XM_020824962.2	protein RETICULATA-RELATED 3, chloroplastic	TCONS_00032842	cca-miR156b	7	0.225806	3.7815e-07
XM_020824962.2	protein RETICULATA-RELATED 3, chloroplastic	TCONS_00032842	gma-miR156q	7	0.225806	3.7815e-07
XM_020824962.2	protein RETICULATA-RELATED 3, chloroplastic	TCONS_00033339	ahy-miR156b-5p	3	1	0.00966995
XM_020824962.2	protein RETICULATA-RELATED 3, chloroplastic	TCONS_00033339	bcy-miR156	3	1	0.00966995
XM_020824962.2	protein RETICULATA-RELATED 3, chloroplastic	XR_002303219.2	aly-miR156a-5p	10	0.263158	9.64503e-12
XM_020824962.2	protein RETICULATA-RELATED 3, chloroplastic	XR_002303219.2	aly-miR156g-5p	10	0.263158	9.64503e-12
XM_020824962.2	protein RETICULATA-RELATED 3, chloroplastic	XR_002303219.2	bna-miR156a	10	0.263158	9.64503e-12
XM_020824962.2	protein RETICULATA-RELATED 3, chloroplastic	XR_002303219.2	cca-miR156b	10	0.263158	9.64503e-12
XM_020824962.2	protein RETICULATA-RELATED 3, chloroplastic	XR_002303219.2	gma-miR156q	10	0.263158	9.64503e-12
XM_020824962.2	protein RETICULATA-RELATED 3, chloroplastic	XR_003700116.1	ahy-miR156b-5p	3	0.12	0.00966995
XM_020824962.2	protein RETICULATA-RELATED 3, chloroplastic	XR_003701652.1	ahy-miR156b-5p	9	0.473684	4.35402e-10
XM_020824962.2	protein RETICULATA-RELATED 3, chloroplastic	XR_003701652.1	aly-miR156a-5p	9	0.473684	4.35402e-10
XM_020824962.2	protein RETICULATA-RELATED 3, chloroplastic	XR_003701652.1	bna-miR156a	9	0.473684	4.35402e-10
XM_020824962.2	protein RETICULATA-RELATED 3, chloroplastic	XR_003701652.1	cca-miR156b	9	0.473684	4.35402e-10
XM_020824962.2	protein RETICULATA-RELATED 3, chloroplastic	XR_003701652.1	gma-miR156q	9	0.473684	4.35402e-10
XM_020824962.2	protein RETICULATA-RELATED 3, chloroplastic	XR_003701652.1	mtr-miR156j	9	0.473684	4.35402e-10
XM_020824962.2	protein RETICULATA-RELATED 3, chloroplastic	XR_003702334.1	aly-miR156a-5p	7	0.368421	3.7815e-07
XM_020824962.2	protein RETICULATA-RELATED 3, chloroplastic	XR_003702334.1	aly-miR156g-5p	7	0.368421	3.7815e-07
XM_020824962.2	protein RETICULATA-RELATED 3, chloroplastic	XR_003702334.1	bna-miR156a	7	0.368421	3.7815e-07
XM_020824962.2	protein RETICULATA-RELATED 3, chloroplastic	XR_003702334.1	cca-miR156b	7	0.368421	3.7815e-07
XM_020824962.2	protein RETICULATA-RELATED 3, chloroplastic	XR_003702334.1	gma-miR156q	7	0.368421	3.7815e-07
XM_020824962.2	protein RETICULATA-RELATED 3, chloroplastic	XR_003702767.1	aly-miR156a-5p	6	0.166667	7.34499e-06
XM_020824962.2	protein RETICULATA-RELATED 3, chloroplastic	XR_003702767.1	bna-miR156a	6	0.166667	7.34499e-06
XM_020824962.2	protein RETICULATA-RELATED 3, chloroplastic	XR_003702767.1	cca-miR156b	6	0.166667	7.34499e-06
XM_020824962.2	protein RETICULATA-RELATED 3, chloroplastic	XR_003702767.1	gma-miR156q	6	0.166667	7.34499e-06
XM_020824997.2	caffeoylshikimate esterase-like	XR_003701247.1	aof-miR171a	3	0.272727	6.67213e-10
XM_020824997.2	caffeoylshikimate esterase-like	XR_003701247.1	mtr-miR171c	3	0.272727	6.67213e-10
XM_020825017.2	uncharacterized LOC110098259	XR_002304478.2	aly-miR396a-3p	3	0.5	1.66495e-08
XM_020825017.2	uncharacterized LOC110098259	XR_002304478.2	ata-miR396e-3p	3	0.5	1.66495e-08
XM_020825017.2	uncharacterized LOC110098259	XR_002304478.2	osa-miR396a-3p	3	0.5	1.66495e-08
XM_020825160.2	cyclin-dependent kinase B1-1	XR_003701247.1	aof-miR171a	3	0.272727	8.03797e-07
XM_020825160.2	cyclin-dependent kinase B1-1	XR_003701247.1	mtr-miR171c	3	0.272727	8.03797e-07
XM_020825161.2	calcium-binding protein CML42-like	XR_002303327.2	aly-miR169b-5p	6	0.285714	1.73794e-15
XM_020825161.2	calcium-binding protein CML42-like	XR_002303623.2	aly-miR169b-5p	4	0.153846	3.37151e-09
XM_020825161.2	calcium-binding protein CML42-like	XR_002303625.2	aly-miR169b-5p	4	0.153846	3.37151e-09
XM_020825161.2	calcium-binding protein CML42-like	XR_003702492.1	aly-miR169b-5p	4	0.153846	3.37151e-09
XM_020825161.2	calcium-binding protein CML42-like	XR_003702493.1	aly-miR169b-5p	4	0.153846	3.37151e-09
XM_020825290.2	SAGA-associated factor 29 homolog B, transcript variant X1	XR_002304634.2	NW_021319083.1_4007	5	0.294118	0
XM_020825291.2	SAGA-associated factor 29 homolog B, transcript variant X2	XR_002304634.2	NW_021319083.1_4007	5	0.294118	0
XM_020825314.2	17.6 kDa class I heat shock protein-like	XR_003700959.1	aly-miR393a-5p	7	0.411765	3.23338e-17
XM_020825314.2	17.6 kDa class I heat shock protein-like	XR_003700959.1	aof-miR393b	7	0.411765	3.23338e-17
XM_020825314.2	17.6 kDa class I heat shock protein-like	XR_003700959.1	ata-miR393-5p	7	0.411765	3.23338e-17
XM_020825314.2	17.6 kDa class I heat shock protein-like	XR_003700959.1	bdi-miR393a	7	0.411765	3.23338e-17
XM_020825314.2	17.6 kDa class I heat shock protein-like	XR_003700959.1	csi-miR393a	7	0.411765	3.23338e-17
XM_020825314.2	17.6 kDa class I heat shock protein-like	XR_003700959.1	csi-miR393b-5p	7	0.411765	3.23338e-17
XM_020825314.2	17.6 kDa class I heat shock protein-like	XR_003700960.1	aly-miR393a-5p	7	0.411765	3.23338e-17
XM_020825314.2	17.6 kDa class I heat shock protein-like	XR_003700960.1	aof-miR393b	7	0.411765	3.23338e-17
XM_020825314.2	17.6 kDa class I heat shock protein-like	XR_003700960.1	ata-miR393-5p	7	0.411765	3.23338e-17
XM_020825314.2	17.6 kDa class I heat shock protein-like	XR_003700960.1	bdi-miR393a	7	0.411765	3.23338e-17
XM_020825314.2	17.6 kDa class I heat shock protein-like	XR_003700960.1	csi-miR393a	7	0.411765	3.23338e-17
XM_020825314.2	17.6 kDa class I heat shock protein-like	XR_003700960.1	csi-miR393b-5p	7	0.411765	3.23338e-17
XM_020825314.2	17.6 kDa class I heat shock protein-like	XR_003701391.1	aly-miR393a-5p	6	0.333333	1.11002e-13
XM_020825314.2	17.6 kDa class I heat shock protein-like	XR_003701391.1	aof-miR393b	6	0.333333	1.11002e-13
XM_020825314.2	17.6 kDa class I heat shock protein-like	XR_003701391.1	ata-miR393-5p	6	0.333333	1.11002e-13
XM_020825314.2	17.6 kDa class I heat shock protein-like	XR_003701391.1	bdi-miR393a	6	0.333333	1.11002e-13
XM_020825314.2	17.6 kDa class I heat shock protein-like	XR_003701391.1	csi-miR393b-5p	6	0.333333	1.11002e-13
XM_020825318.2	ethylene-responsive transcription factor ERF113	TCONS_00017098	aqc-miR172b	3	0.214286	1.66495e-08
XM_020825345.2	glycerophosphodiester phosphodiesterase GDPDL3	TCONS_00033747	gma-miR156e	3	0.1875	1.49014e-07
XM_020825345.2	glycerophosphodiester phosphodiesterase GDPDL3	TCONS_00033747	gma-miR156r	3	0.1875	1.49014e-07
XM_020825351.2	nuclear poly(A) polymerase 4, transcript variant X2	TCONS_00000917	aly-miR168a-5p	8	0.8	2.57825e-12
XM_020825351.2	nuclear poly(A) polymerase 4, transcript variant X2	TCONS_00000917	bra-miR168b-5p	8	0.8	2.57825e-12
XM_020825351.2	nuclear poly(A) polymerase 4, transcript variant X2	TCONS_00000917	lja-miR168-5p	8	0.8	2.57825e-12
XM_020825351.2	nuclear poly(A) polymerase 4, transcript variant X2	XR_003703113.1	aly-miR168a-5p	9	0.692308	1.53448e-14
XM_020825351.2	nuclear poly(A) polymerase 4, transcript variant X2	XR_003703113.1	bra-miR168b-5p	9	0.692308	1.53448e-14
XM_020825351.2	nuclear poly(A) polymerase 4, transcript variant X2	XR_003703113.1	lja-miR168-5p	9	0.692308	1.53448e-14
XM_020825447.2	phenolic glucoside malonyltransferase 1-like	TCONS_00010017	gma-miR390b-5p	4	1	6.77028e-07
XM_020825447.2	phenolic glucoside malonyltransferase 1-like	TCONS_00015787	gma-miR390b-5p	3	1	3.97342e-05
XM_020825447.2	phenolic glucoside malonyltransferase 1-like	TCONS_00015788	gma-miR390b-5p	3	1	3.97342e-05
XM_020825447.2	phenolic glucoside malonyltransferase 1-like	XR_003700794.1	gma-miR390b-5p	3	0.230769	3.97342e-05
XM_020825500.2	phenolic glucoside malonyltransferase 1	TCONS_00010017	gma-miR390b-5p	4	1	7.70454e-12
XM_020825500.2	phenolic glucoside malonyltransferase 1	TCONS_00015787	gma-miR390b-5p	3	1	1.66495e-08
XM_020825500.2	phenolic glucoside malonyltransferase 1	TCONS_00015788	gma-miR390b-5p	3	1	1.66495e-08
XM_020825500.2	phenolic glucoside malonyltransferase 1	XR_003700790.1	gma-miR390b-5p	3	0.428571	1.66495e-08
XM_020825500.2	phenolic glucoside malonyltransferase 1	XR_003700792.1	gma-miR390b-5p	3	0.75	1.66495e-08
XM_020825500.2	phenolic glucoside malonyltransferase 1	XR_003700794.1	gma-miR390b-5p	3	0.230769	1.66495e-08
XM_020825573.2	protein DGS1, mitochondrial, transcript variant X1	TCONS_00031314	gma-miR319p	4	0.210526	0.00118814
XM_020825573.2	protein DGS1, mitochondrial, transcript variant X1	TCONS_00031314	ptc-miR319i	4	0.210526	0.00118814
XM_020825573.2	protein DGS1, mitochondrial, transcript variant X1	TCONS_00032841	cpa-miR159b	3	0.111111	0.00966995
XM_020825573.2	protein DGS1, mitochondrial, transcript variant X1	TCONS_00032841	pta-miR159c	3	0.111111	0.00966995
XM_020825573.2	protein DGS1, mitochondrial, transcript variant X1	TCONS_00032841	ptc-miR159d	3	0.111111	0.00966995
XM_020825573.2	protein DGS1, mitochondrial, transcript variant X1	TCONS_00032842	cpa-miR159b	3	0.0967742	0.00966995
XM_020825573.2	protein DGS1, mitochondrial, transcript variant X1	TCONS_00032842	pta-miR159c	3	0.0967742	0.00966995
XM_020825573.2	protein DGS1, mitochondrial, transcript variant X1	TCONS_00032842	ptc-miR159d	3	0.0967742	0.00966995
XM_020825573.2	protein DGS1, mitochondrial, transcript variant X1	XR_002305298.2	cpa-miR159b	10	0.588235	9.64503e-12
XM_020825573.2	protein DGS1, mitochondrial, transcript variant X1	XR_002305298.2	csi-miR159c-3p	10	0.588235	9.64503e-12
XM_020825573.2	protein DGS1, mitochondrial, transcript variant X1	XR_002305298.2	gma-miR319p	10	0.588235	9.64503e-12
XM_020825573.2	protein DGS1, mitochondrial, transcript variant X1	XR_002305298.2	mes-miR319h	10	0.588235	9.64503e-12
XM_020825573.2	protein DGS1, mitochondrial, transcript variant X1	XR_002305298.2	NW_021320138.1_11162	10	0.588235	9.64503e-12
XM_020825573.2	protein DGS1, mitochondrial, transcript variant X1	XR_002305298.2	ppt-miR319a	10	0.588235	9.64503e-12
XM_020825573.2	protein DGS1, mitochondrial, transcript variant X1	XR_002305298.2	pta-miR159c	10	0.588235	9.64503e-12
XM_020825573.2	protein DGS1, mitochondrial, transcript variant X1	XR_002305298.2	ptc-miR159d	10	0.588235	9.64503e-12
XM_020825573.2	protein DGS1, mitochondrial, transcript variant X1	XR_003701426.1	aau-miR319	13	0.464286	1.61028e-17
XM_020825573.2	protein DGS1, mitochondrial, transcript variant X1	XR_003701426.1	aly-miR319c-3p	13	0.464286	1.61028e-17
XM_020825573.2	protein DGS1, mitochondrial, transcript variant X1	XR_003701426.1	atr-miR319a	13	0.464286	1.61028e-17
XM_020825573.2	protein DGS1, mitochondrial, transcript variant X1	XR_003701426.1	cme-miR319c	13	0.464286	1.61028e-17
XM_020825573.2	protein DGS1, mitochondrial, transcript variant X1	XR_003701426.1	csi-miR159c-3p	13	0.464286	1.61028e-17
XM_020825573.2	protein DGS1, mitochondrial, transcript variant X1	XR_003701426.1	gma-miR319g	13	0.464286	1.61028e-17
XM_020825573.2	protein DGS1, mitochondrial, transcript variant X1	XR_003701426.1	gma-miR319p	13	0.464286	1.61028e-17
XM_020825573.2	protein DGS1, mitochondrial, transcript variant X1	XR_003701426.1	mes-miR319h	13	0.464286	1.61028e-17
XM_020825573.2	protein DGS1, mitochondrial, transcript variant X1	XR_003701426.1	mtr-miR319c-3p	13	0.464286	1.61028e-17
XM_020825573.2	protein DGS1, mitochondrial, transcript variant X1	XR_003701426.1	ppt-miR319a	13	0.464286	1.61028e-17
XM_020825573.2	protein DGS1, mitochondrial, transcript variant X1	XR_003701426.1	pta-miR319	13	0.464286	1.61028e-17
XM_020825573.2	protein DGS1, mitochondrial, transcript variant X1	XR_003702280.1	csi-miR159c-3p	6	0.75	7.34499e-06
XM_020825573.2	protein DGS1, mitochondrial, transcript variant X1	XR_003702280.1	gma-miR319p	6	0.75	7.34499e-06
XM_020825573.2	protein DGS1, mitochondrial, transcript variant X1	XR_003702280.1	mes-miR319h	6	0.75	7.34499e-06
XM_020825573.2	protein DGS1, mitochondrial, transcript variant X1	XR_003702280.1	NW_021320138.1_11162	6	0.75	7.34499e-06
XM_020825573.2	protein DGS1, mitochondrial, transcript variant X1	XR_003702280.1	ppt-miR319a	6	0.75	7.34499e-06
XM_020825679.2	probable leucine-rich repeat receptor-like protein kinase At5g49770, transcript variant X2	XR_002303972.2	NW_021390876.1_12379	3	0.157895	1.66495e-08
XM_020825679.2	probable leucine-rich repeat receptor-like protein kinase At5g49770, transcript variant X2	XR_003701390.1	NW_021390876.1_12379	3	0.0810811	1.66495e-08
XM_020825679.2	probable leucine-rich repeat receptor-like protein kinase At5g49770, transcript variant X2	XR_003701391.1	NW_021390876.1_12379	3	0.166667	1.66495e-08
XM_020825679.2	probable leucine-rich repeat receptor-like protein kinase At5g49770, transcript variant X2	XR_003703327.1	NW_021390876.1_12379	4	0.235294	7.70454e-12
XM_020825680.2	probable leucine-rich repeat receptor-like protein kinase At5g49770, transcript variant X3	XR_002303623.2	vvi-miR3630-3p	4	0.153846	2.76828e-10
XM_020825680.2	probable leucine-rich repeat receptor-like protein kinase At5g49770, transcript variant X3	XR_002303625.2	vvi-miR3630-3p	4	0.153846	2.76828e-10
XM_020825680.2	probable leucine-rich repeat receptor-like protein kinase At5g49770, transcript variant X3	XR_003702199.1	vvi-miR3630-3p	5	0.131579	1.07007e-13
XM_020825680.2	probable leucine-rich repeat receptor-like protein kinase At5g49770, transcript variant X3	XR_003702200.1	vvi-miR3630-3p	4	0.111111	2.76828e-10
XM_020825680.2	probable leucine-rich repeat receptor-like protein kinase At5g49770, transcript variant X3	XR_003702492.1	vvi-miR3630-3p	4	0.153846	2.76828e-10
XM_020825680.2	probable leucine-rich repeat receptor-like protein kinase At5g49770, transcript variant X3	XR_003702493.1	vvi-miR3630-3p	4	0.153846	2.76828e-10
XM_020825681.2	protein LOW PSII ACCUMULATION 1, chloroplastic, transcript variant X2	XR_002303327.2	aly-miR169b-5p	3	0.142857	8.03797e-07
XM_020825681.2	protein LOW PSII ACCUMULATION 1, chloroplastic, transcript variant X2	XR_002303623.2	aly-miR169b-5p	5	0.192308	5.23294e-12
XM_020825681.2	protein LOW PSII ACCUMULATION 1, chloroplastic, transcript variant X2	XR_002303623.2	bdi-miR529-5p	5	0.192308	5.23294e-12
XM_020825681.2	protein LOW PSII ACCUMULATION 1, chloroplastic, transcript variant X2	XR_002303623.2	ppt-miR529e	5	0.192308	5.23294e-12
XM_020825681.2	protein LOW PSII ACCUMULATION 1, chloroplastic, transcript variant X2	XR_002303625.2	aly-miR169b-5p	5	0.192308	5.23294e-12
XM_020825681.2	protein LOW PSII ACCUMULATION 1, chloroplastic, transcript variant X2	XR_002303625.2	bdi-miR529-5p	5	0.192308	5.23294e-12
XM_020825681.2	protein LOW PSII ACCUMULATION 1, chloroplastic, transcript variant X2	XR_002303625.2	ppt-miR529e	5	0.192308	5.23294e-12
XM_020825681.2	protein LOW PSII ACCUMULATION 1, chloroplastic, transcript variant X2	XR_003702413.1	aly-miR157d-5p	4	0.235294	3.37151e-09
XM_020825681.2	protein LOW PSII ACCUMULATION 1, chloroplastic, transcript variant X2	XR_003702413.1	bdi-miR529-5p	4	0.235294	3.37151e-09
XM_020825681.2	protein LOW PSII ACCUMULATION 1, chloroplastic, transcript variant X2	XR_003702413.1	ppt-miR529e	4	0.235294	3.37151e-09
XM_020825681.2	protein LOW PSII ACCUMULATION 1, chloroplastic, transcript variant X2	XR_003702492.1	aly-miR169b-5p	5	0.192308	5.23294e-12
XM_020825681.2	protein LOW PSII ACCUMULATION 1, chloroplastic, transcript variant X2	XR_003702492.1	bdi-miR529-5p	5	0.192308	5.23294e-12
XM_020825681.2	protein LOW PSII ACCUMULATION 1, chloroplastic, transcript variant X2	XR_003702492.1	ppt-miR529e	5	0.192308	5.23294e-12
XM_020825681.2	protein LOW PSII ACCUMULATION 1, chloroplastic, transcript variant X2	XR_003702493.1	aly-miR169b-5p	5	0.192308	5.23294e-12
XM_020825681.2	protein LOW PSII ACCUMULATION 1, chloroplastic, transcript variant X2	XR_003702493.1	bdi-miR529-5p	5	0.192308	5.23294e-12
XM_020825681.2	protein LOW PSII ACCUMULATION 1, chloroplastic, transcript variant X2	XR_003702493.1	ppt-miR529e	5	0.192308	5.23294e-12
XM_020825817.2	heavy metal-associated isoprenylated plant protein 23, transcript variant X1	TCONS_00010551	aof-miR395a	4	1	2.63519e-05
XM_020825817.2	heavy metal-associated isoprenylated plant protein 23, transcript variant X1	TCONS_00010551	osa-miR395b	4	1	2.63519e-05
XM_020825817.2	heavy metal-associated isoprenylated plant protein 23, transcript variant X1	TCONS_00023661	aly-miR395d-3p	7	0.318182	2.70401e-10
XM_020825817.2	heavy metal-associated isoprenylated plant protein 23, transcript variant X1	TCONS_00023661	cme-miR395b	7	0.318182	2.70401e-10
XM_020825817.2	heavy metal-associated isoprenylated plant protein 23, transcript variant X1	TCONS_00023661	sly-miR395a	7	0.318182	2.70401e-10
XM_020825817.2	heavy metal-associated isoprenylated plant protein 23, transcript variant X1	TCONS_00023668	aof-miR395a	5	0.833333	8.48144e-07
XM_020825817.2	heavy metal-associated isoprenylated plant protein 23, transcript variant X1	TCONS_00023668	ata-miR395e-3p	5	0.833333	8.48144e-07
XM_020825817.2	heavy metal-associated isoprenylated plant protein 23, transcript variant X1	TCONS_00023668	eun-miR395-3p	5	0.833333	8.48144e-07
XM_020825817.2	heavy metal-associated isoprenylated plant protein 23, transcript variant X1	TCONS_00024832	aly-miR395d-3p	10	0.833333	5.30529e-17
XM_020825817.2	heavy metal-associated isoprenylated plant protein 23, transcript variant X1	TCONS_00024832	ata-miR395e-3p	10	0.833333	5.30529e-17
XM_020825817.2	heavy metal-associated isoprenylated plant protein 23, transcript variant X1	TCONS_00024832	cme-miR395b	10	0.833333	5.30529e-17
XM_020825817.2	heavy metal-associated isoprenylated plant protein 23, transcript variant X1	TCONS_00024832	eun-miR395-3p	10	0.833333	5.30529e-17
XM_020825817.2	heavy metal-associated isoprenylated plant protein 23, transcript variant X1	TCONS_00024832	sly-miR395a	10	0.833333	5.30529e-17
XM_020825817.2	heavy metal-associated isoprenylated plant protein 23, transcript variant X1	TCONS_00025156	aly-miR395d-3p	5	1	8.48144e-07
XM_020825817.2	heavy metal-associated isoprenylated plant protein 23, transcript variant X1	TCONS_00025156	mdm-miR395l	5	1	8.48144e-07
XM_020825817.2	heavy metal-associated isoprenylated plant protein 23, transcript variant X1	TCONS_00025156	sly-miR395a	5	1	8.48144e-07
XM_020825817.2	heavy metal-associated isoprenylated plant protein 23, transcript variant X1	TCONS_00025990	aly-miR395d-3p	11	0.916667	9.44129e-20
XM_020825817.2	heavy metal-associated isoprenylated plant protein 23, transcript variant X1	TCONS_00025990	aof-miR395a	11	0.916667	9.44129e-20
XM_020825817.2	heavy metal-associated isoprenylated plant protein 23, transcript variant X1	TCONS_00025990	ata-miR395e-3p	11	0.916667	9.44129e-20
XM_020825817.2	heavy metal-associated isoprenylated plant protein 23, transcript variant X1	TCONS_00025990	cme-miR395b	11	0.916667	9.44129e-20
XM_020825817.2	heavy metal-associated isoprenylated plant protein 23, transcript variant X1	TCONS_00025990	eun-miR395-3p	11	0.916667	9.44129e-20
XM_020825817.2	heavy metal-associated isoprenylated plant protein 23, transcript variant X1	TCONS_00025990	mdm-miR395l	11	0.916667	9.44129e-20
XM_020825817.2	heavy metal-associated isoprenylated plant protein 23, transcript variant X1	TCONS_00025990	osa-miR395b	11	0.916667	9.44129e-20
XM_020825817.2	heavy metal-associated isoprenylated plant protein 23, transcript variant X1	TCONS_00025990	sly-miR395a	11	0.916667	9.44129e-20
XM_020825817.2	heavy metal-associated isoprenylated plant protein 23, transcript variant X1	TCONS_00032470	aly-miR395d-3p	7	0.7	2.70401e-10
XM_020825817.2	heavy metal-associated isoprenylated plant protein 23, transcript variant X1	TCONS_00032470	aof-miR395a	7	0.7	2.70401e-10
XM_020825817.2	heavy metal-associated isoprenylated plant protein 23, transcript variant X1	TCONS_00032470	ata-miR395e-3p	7	0.7	2.70401e-10
XM_020825817.2	heavy metal-associated isoprenylated plant protein 23, transcript variant X1	TCONS_00032470	sly-miR395a	7	0.7	2.70401e-10
XM_020825817.2	heavy metal-associated isoprenylated plant protein 23, transcript variant X1	XR_002303785.2	ata-miR395e-3p	3	0.75	0.000554279
XM_020825817.2	heavy metal-associated isoprenylated plant protein 23, transcript variant X1	XR_002304634.2	eun-miR395-3p	4	0.235294	2.63519e-05
XM_020825817.2	heavy metal-associated isoprenylated plant protein 23, transcript variant X1	XR_003700116.1	eun-miR395-3p	3	0.12	0.000554279
XM_020825817.2	heavy metal-associated isoprenylated plant protein 23, transcript variant X1	XR_003701379.1	aly-miR395d-3p	11	0.785714	9.44129e-20
XM_020825817.2	heavy metal-associated isoprenylated plant protein 23, transcript variant X1	XR_003701379.1	cme-miR395b	11	0.785714	9.44129e-20
XM_020825817.2	heavy metal-associated isoprenylated plant protein 23, transcript variant X1	XR_003701379.1	eun-miR395-3p	11	0.785714	9.44129e-20
XM_020825817.2	heavy metal-associated isoprenylated plant protein 23, transcript variant X1	XR_003701379.1	mdm-miR395l	11	0.785714	9.44129e-20
XM_020825817.2	heavy metal-associated isoprenylated plant protein 23, transcript variant X1	XR_003701379.1	osa-miR395b	11	0.785714	9.44129e-20
XM_020825817.2	heavy metal-associated isoprenylated plant protein 23, transcript variant X1	XR_003701379.1	sly-miR395a	11	0.785714	9.44129e-20
XM_020825817.2	heavy metal-associated isoprenylated plant protein 23, transcript variant X1	XR_003701381.1	aly-miR395d-3p	11	0.785714	9.44129e-20
XM_020825817.2	heavy metal-associated isoprenylated plant protein 23, transcript variant X1	XR_003701381.1	cme-miR395b	11	0.785714	9.44129e-20
XM_020825817.2	heavy metal-associated isoprenylated plant protein 23, transcript variant X1	XR_003701381.1	eun-miR395-3p	11	0.785714	9.44129e-20
XM_020825817.2	heavy metal-associated isoprenylated plant protein 23, transcript variant X1	XR_003701381.1	mdm-miR395l	11	0.785714	9.44129e-20
XM_020825817.2	heavy metal-associated isoprenylated plant protein 23, transcript variant X1	XR_003701381.1	osa-miR395b	11	0.785714	9.44129e-20
XM_020825817.2	heavy metal-associated isoprenylated plant protein 23, transcript variant X1	XR_003701381.1	sly-miR395a	11	0.785714	9.44129e-20
XM_020825817.2	heavy metal-associated isoprenylated plant protein 23, transcript variant X1	XR_003703321.1	aly-miR395d-3p	4	1	2.63519e-05
XM_020825817.2	heavy metal-associated isoprenylated plant protein 23, transcript variant X1	XR_003703321.1	sly-miR395a	4	1	2.63519e-05
XM_020825830.2	inorganic phosphate transporter 1-4	TCONS_00023661	aly-miR395d-3p	6	0.272727	3.27076e-06
XM_020825830.2	inorganic phosphate transporter 1-4	TCONS_00023661	cme-miR395b	6	0.272727	3.27076e-06
XM_020825830.2	inorganic phosphate transporter 1-4	TCONS_00023661	sly-miR395a	6	0.272727	3.27076e-06
XM_020825830.2	inorganic phosphate transporter 1-4	TCONS_00024832	aly-miR395d-3p	5	0.416667	5.5869e-05
XM_020825830.2	inorganic phosphate transporter 1-4	TCONS_00024832	ata-miR395e-3p	5	0.416667	5.5869e-05
XM_020825830.2	inorganic phosphate transporter 1-4	TCONS_00024832	cme-miR395b	5	0.416667	5.5869e-05
XM_020825830.2	inorganic phosphate transporter 1-4	TCONS_00024832	sly-miR395a	5	0.416667	5.5869e-05
XM_020825830.2	inorganic phosphate transporter 1-4	TCONS_00025156	aly-miR395d-3p	3	0.6	0.00656249
XM_020825830.2	inorganic phosphate transporter 1-4	TCONS_00025156	mdm-miR395l	3	0.6	0.00656249
XM_020825830.2	inorganic phosphate transporter 1-4	TCONS_00025156	sly-miR395a	3	0.6	0.00656249
XM_020825830.2	inorganic phosphate transporter 1-4	TCONS_00025990	aly-miR395d-3p	5	0.416667	5.5869e-05
XM_020825830.2	inorganic phosphate transporter 1-4	TCONS_00025990	ata-miR395e-3p	5	0.416667	5.5869e-05
XM_020825830.2	inorganic phosphate transporter 1-4	TCONS_00025990	cme-miR395b	5	0.416667	5.5869e-05
XM_020825830.2	inorganic phosphate transporter 1-4	TCONS_00025990	mdm-miR395l	5	0.416667	5.5869e-05
XM_020825830.2	inorganic phosphate transporter 1-4	TCONS_00025990	sly-miR395a	5	0.416667	5.5869e-05
XM_020825830.2	inorganic phosphate transporter 1-4	TCONS_00032470	aly-miR395d-3p	7	0.7	1.43e-07
XM_020825830.2	inorganic phosphate transporter 1-4	TCONS_00032470	ata-miR395e-3p	7	0.7	1.43e-07
XM_020825830.2	inorganic phosphate transporter 1-4	TCONS_00032470	ata-miR399b-3p	7	0.7	1.43e-07
XM_020825830.2	inorganic phosphate transporter 1-4	TCONS_00032470	sly-miR395a	7	0.7	1.43e-07
XM_020825830.2	inorganic phosphate transporter 1-4	XR_003700993.1	ata-miR399b-3p	4	0.8	0.00070798
XM_020825830.2	inorganic phosphate transporter 1-4	XR_003701379.1	aly-miR395d-3p	5	0.357143	5.5869e-05
XM_020825830.2	inorganic phosphate transporter 1-4	XR_003701379.1	cme-miR395b	5	0.357143	5.5869e-05
XM_020825830.2	inorganic phosphate transporter 1-4	XR_003701379.1	mdm-miR395l	5	0.357143	5.5869e-05
XM_020825830.2	inorganic phosphate transporter 1-4	XR_003701379.1	sly-miR395a	5	0.357143	5.5869e-05
XM_020825830.2	inorganic phosphate transporter 1-4	XR_003701381.1	aly-miR395d-3p	5	0.357143	5.5869e-05
XM_020825830.2	inorganic phosphate transporter 1-4	XR_003701381.1	cme-miR395b	5	0.357143	5.5869e-05
XM_020825830.2	inorganic phosphate transporter 1-4	XR_003701381.1	mdm-miR395l	5	0.357143	5.5869e-05
XM_020825830.2	inorganic phosphate transporter 1-4	XR_003701381.1	sly-miR395a	5	0.357143	5.5869e-05
XM_020825830.2	inorganic phosphate transporter 1-4	XR_003703321.1	aly-miR395d-3p	4	1	0.00070798
XM_020825830.2	inorganic phosphate transporter 1-4	XR_003703321.1	sly-miR395a	4	1	0.00070798
XM_020825835.2	inorganic phosphate transporter 1-4-like	TCONS_00023661	aly-miR395d-3p	6	0.272727	1.36918e-06
XM_020825835.2	inorganic phosphate transporter 1-4-like	TCONS_00023661	cme-miR395b	6	0.272727	1.36918e-06
XM_020825835.2	inorganic phosphate transporter 1-4-like	TCONS_00023661	sly-miR395a	6	0.272727	1.36918e-06
XM_020825835.2	inorganic phosphate transporter 1-4-like	TCONS_00024832	aly-miR395d-3p	5	0.416667	2.75304e-05
XM_020825835.2	inorganic phosphate transporter 1-4-like	TCONS_00024832	ata-miR395e-3p	5	0.416667	2.75304e-05
XM_020825835.2	inorganic phosphate transporter 1-4-like	TCONS_00024832	cme-miR395b	5	0.416667	2.75304e-05
XM_020825835.2	inorganic phosphate transporter 1-4-like	TCONS_00024832	sly-miR395a	5	0.416667	2.75304e-05
XM_020825835.2	inorganic phosphate transporter 1-4-like	TCONS_00025156	aly-miR395d-3p	3	0.6	0.00432078
XM_020825835.2	inorganic phosphate transporter 1-4-like	TCONS_00025156	mdm-miR395l	3	0.6	0.00432078
XM_020825835.2	inorganic phosphate transporter 1-4-like	TCONS_00025156	sly-miR395a	3	0.6	0.00432078
XM_020825835.2	inorganic phosphate transporter 1-4-like	TCONS_00025990	aly-miR395d-3p	5	0.416667	2.75304e-05
XM_020825835.2	inorganic phosphate transporter 1-4-like	TCONS_00025990	ata-miR395e-3p	5	0.416667	2.75304e-05
XM_020825835.2	inorganic phosphate transporter 1-4-like	TCONS_00025990	cme-miR395b	5	0.416667	2.75304e-05
XM_020825835.2	inorganic phosphate transporter 1-4-like	TCONS_00025990	mdm-miR395l	5	0.416667	2.75304e-05
XM_020825835.2	inorganic phosphate transporter 1-4-like	TCONS_00025990	sly-miR395a	5	0.416667	2.75304e-05
XM_020825835.2	inorganic phosphate transporter 1-4-like	TCONS_00032470	aly-miR395d-3p	7	0.7	5.01276e-08
XM_020825835.2	inorganic phosphate transporter 1-4-like	TCONS_00032470	ata-miR395e-3p	7	0.7	5.01276e-08
XM_020825835.2	inorganic phosphate transporter 1-4-like	TCONS_00032470	ata-miR399b-3p	7	0.7	5.01276e-08
XM_020825835.2	inorganic phosphate transporter 1-4-like	TCONS_00032470	sly-miR395a	7	0.7	5.01276e-08
XM_020825835.2	inorganic phosphate transporter 1-4-like	XR_003700993.1	ata-miR399b-3p	4	0.8	0.000405553
XM_020825835.2	inorganic phosphate transporter 1-4-like	XR_003701379.1	aly-miR395d-3p	5	0.357143	2.75304e-05
XM_020825835.2	inorganic phosphate transporter 1-4-like	XR_003701379.1	cme-miR395b	5	0.357143	2.75304e-05
XM_020825835.2	inorganic phosphate transporter 1-4-like	XR_003701379.1	mdm-miR395l	5	0.357143	2.75304e-05
XM_020825835.2	inorganic phosphate transporter 1-4-like	XR_003701379.1	sly-miR395a	5	0.357143	2.75304e-05
XM_020825835.2	inorganic phosphate transporter 1-4-like	XR_003701381.1	aly-miR395d-3p	5	0.357143	2.75304e-05
XM_020825835.2	inorganic phosphate transporter 1-4-like	XR_003701381.1	cme-miR395b	5	0.357143	2.75304e-05
XM_020825835.2	inorganic phosphate transporter 1-4-like	XR_003701381.1	mdm-miR395l	5	0.357143	2.75304e-05
XM_020825835.2	inorganic phosphate transporter 1-4-like	XR_003701381.1	sly-miR395a	5	0.357143	2.75304e-05
XM_020825835.2	inorganic phosphate transporter 1-4-like	XR_003703321.1	aly-miR395d-3p	4	1	0.000405553
XM_020825835.2	inorganic phosphate transporter 1-4-like	XR_003703321.1	sly-miR395a	4	1	0.000405553
XM_020825917.2	probable protein phosphatase 2C 12	TCONS_00023661	aly-miR395d-3p	7	0.318182	7.66241e-12
XM_020825917.2	probable protein phosphatase 2C 12	TCONS_00023661	cme-miR395b	7	0.318182	7.66241e-12
XM_020825917.2	probable protein phosphatase 2C 12	TCONS_00023661	sly-miR395a	7	0.318182	7.66241e-12
XM_020825917.2	probable protein phosphatase 2C 12	TCONS_00023668	aof-miR395a	3	0.5	0.000145045
XM_020825917.2	probable protein phosphatase 2C 12	TCONS_00023668	ata-miR395e-3p	3	0.5	0.000145045
XM_020825917.2	probable protein phosphatase 2C 12	TCONS_00024832	aly-miR395d-3p	7	0.583333	7.66241e-12
XM_020825917.2	probable protein phosphatase 2C 12	TCONS_00024832	ata-miR395e-3p	7	0.583333	7.66241e-12
XM_020825917.2	probable protein phosphatase 2C 12	TCONS_00024832	cme-miR395b	7	0.583333	7.66241e-12
XM_020825917.2	probable protein phosphatase 2C 12	TCONS_00024832	sly-miR395a	7	0.583333	7.66241e-12
XM_020825917.2	probable protein phosphatase 2C 12	TCONS_00025156	aly-miR395d-3p	5	1	8.4984e-08
XM_020825917.2	probable protein phosphatase 2C 12	TCONS_00025156	mdm-miR395l	5	1	8.4984e-08
XM_020825917.2	probable protein phosphatase 2C 12	TCONS_00025156	sly-miR395a	5	1	8.4984e-08
XM_020825917.2	probable protein phosphatase 2C 12	TCONS_00025990	aly-miR395d-3p	8	0.666667	3.22125e-14
XM_020825917.2	probable protein phosphatase 2C 12	TCONS_00025990	aof-miR395a	8	0.666667	3.22125e-14
XM_020825917.2	probable protein phosphatase 2C 12	TCONS_00025990	ata-miR395e-3p	8	0.666667	3.22125e-14
XM_020825917.2	probable protein phosphatase 2C 12	TCONS_00025990	cme-miR395b	8	0.666667	3.22125e-14
XM_020825917.2	probable protein phosphatase 2C 12	TCONS_00025990	mdm-miR395l	8	0.666667	3.22125e-14
XM_020825917.2	probable protein phosphatase 2C 12	TCONS_00025990	sly-miR395a	8	0.666667	3.22125e-14
XM_020825917.2	probable protein phosphatase 2C 12	TCONS_00032470	aly-miR395d-3p	7	0.7	7.66241e-12
XM_020825917.2	probable protein phosphatase 2C 12	TCONS_00032470	aof-miR395a	7	0.7	7.66241e-12
XM_020825917.2	probable protein phosphatase 2C 12	TCONS_00032470	ata-miR395e-3p	7	0.7	7.66241e-12
XM_020825917.2	probable protein phosphatase 2C 12	TCONS_00032470	sly-miR395a	7	0.7	7.66241e-12
XM_020825917.2	probable protein phosphatase 2C 12	XR_003701379.1	aly-miR395d-3p	8	0.571429	3.22125e-14
XM_020825917.2	probable protein phosphatase 2C 12	XR_003701379.1	cme-miR395b	8	0.571429	3.22125e-14
XM_020825917.2	probable protein phosphatase 2C 12	XR_003701379.1	mdm-miR395l	8	0.571429	3.22125e-14
XM_020825917.2	probable protein phosphatase 2C 12	XR_003701379.1	sly-miR395a	8	0.571429	3.22125e-14
XM_020825917.2	probable protein phosphatase 2C 12	XR_003701381.1	aly-miR395d-3p	8	0.571429	3.22125e-14
XM_020825917.2	probable protein phosphatase 2C 12	XR_003701381.1	cme-miR395b	8	0.571429	3.22125e-14
XM_020825917.2	probable protein phosphatase 2C 12	XR_003701381.1	mdm-miR395l	8	0.571429	3.22125e-14
XM_020825917.2	probable protein phosphatase 2C 12	XR_003701381.1	sly-miR395a	8	0.571429	3.22125e-14
XM_020825917.2	probable protein phosphatase 2C 12	XR_003703321.1	aly-miR395d-3p	4	1	4.39205e-06
XM_020825917.2	probable protein phosphatase 2C 12	XR_003703321.1	sly-miR395a	4	1	4.39205e-06
XM_020826033.2	trigger factor-like protein TIG, Chloroplastic, transcript variant X1	TCONS_00010551	aof-miR395a	3	0.75	0
XM_020826033.2	trigger factor-like protein TIG, Chloroplastic, transcript variant X1	TCONS_00023668	aof-miR395a	3	0.5	0
XM_020826033.2	trigger factor-like protein TIG, Chloroplastic, transcript variant X1	TCONS_00023668	ata-miR395e-3p	3	0.5	0
XM_020826033.2	trigger factor-like protein TIG, Chloroplastic, transcript variant X1	TCONS_00024832	ata-miR395e-3p	3	0.25	0
XM_020826033.2	trigger factor-like protein TIG, Chloroplastic, transcript variant X1	TCONS_00025990	aof-miR395a	3	0.25	0
XM_020826033.2	trigger factor-like protein TIG, Chloroplastic, transcript variant X1	TCONS_00025990	ata-miR395e-3p	3	0.25	0
XM_020826033.2	trigger factor-like protein TIG, Chloroplastic, transcript variant X1	TCONS_00032470	aof-miR395a	3	0.3	0
XM_020826033.2	trigger factor-like protein TIG, Chloroplastic, transcript variant X1	TCONS_00032470	ata-miR395e-3p	3	0.3	0
XM_020826033.2	trigger factor-like protein TIG, Chloroplastic, transcript variant X1	XR_002303785.2	ata-miR395e-3p	3	0.75	0
XM_020826076.2	zinc finger protein CONSTANS-LIKE 9, transcript variant X1	TCONS_00017118	cca-miR396a-3p	3	0.5	1.66495e-08
XM_020826076.2	zinc finger protein CONSTANS-LIKE 9, transcript variant X1	TCONS_00017118	cca-miR396c	3	0.5	1.66495e-08
XM_020826076.2	zinc finger protein CONSTANS-LIKE 9, transcript variant X1	TCONS_00024929	cca-miR396a-3p	3	1	1.66495e-08
XM_020826076.2	zinc finger protein CONSTANS-LIKE 9, transcript variant X1	TCONS_00024929	csi-miR396a-3p	3	1	1.66495e-08
XM_020826076.2	zinc finger protein CONSTANS-LIKE 9, transcript variant X1	XR_002303327.2	cca-miR396a-3p	5	0.238095	0
XM_020826076.2	zinc finger protein CONSTANS-LIKE 9, transcript variant X1	XR_002303327.2	cca-miR396c	5	0.238095	0
XM_020826076.2	zinc finger protein CONSTANS-LIKE 9, transcript variant X1	XR_002303327.2	csi-miR396a-3p	5	0.238095	0
XM_020826076.2	zinc finger protein CONSTANS-LIKE 9, transcript variant X1	XR_003702334.1	cca-miR396a-3p	4	0.210526	7.70454e-12
XM_020826076.2	zinc finger protein CONSTANS-LIKE 9, transcript variant X1	XR_003702334.1	cca-miR396c	4	0.210526	7.70454e-12
XM_020826076.2	zinc finger protein CONSTANS-LIKE 9, transcript variant X1	XR_003702334.1	csi-miR396a-3p	4	0.210526	7.70454e-12
XM_020826085.2	aspartyl protease family protein At5g10770-like	XR_003700993.1	ata-miR399b-3p	3	0.6	6.67213e-10
XM_020826146.2	mechanosensitive ion channel protein 6	TCONS_00017098	aly-miR172a-3p	10	0.714286	3.71572e-13
XM_020826146.2	mechanosensitive ion channel protein 6	TCONS_00017098	aly-miR172c-3p	10	0.714286	3.71572e-13
XM_020826146.2	mechanosensitive ion channel protein 6	TCONS_00017098	aqc-miR172b	10	0.714286	3.71572e-13
XM_020826146.2	mechanosensitive ion channel protein 6	TCONS_00017098	ata-miR172a-3p	10	0.714286	3.71572e-13
XM_020826146.2	mechanosensitive ion channel protein 6	TCONS_00017098	csi-miR172a-3p	10	0.714286	3.71572e-13
XM_020826146.2	mechanosensitive ion channel protein 6	TCONS_00017098	stu-miR172c-3p	10	0.714286	3.71572e-13
XM_020826146.2	mechanosensitive ion channel protein 6	TCONS_00036308	aly-miR172a-3p	5	0.833333	2.75304e-05
XM_020826146.2	mechanosensitive ion channel protein 6	TCONS_00036308	aly-miR172c-3p	5	0.833333	2.75304e-05
XM_020826146.2	mechanosensitive ion channel protein 6	TCONS_00036308	ata-miR172a-3p	5	0.833333	2.75304e-05
XM_020826146.2	mechanosensitive ion channel protein 6	TCONS_00036308	csi-miR172a-3p	5	0.833333	2.75304e-05
XM_020826146.2	mechanosensitive ion channel protein 6	TCONS_00036308	stu-miR172c-3p	5	0.833333	2.75304e-05
XM_020826146.2	mechanosensitive ion channel protein 6	XR_003701114.1	aly-miR172a-3p	6	0.75	1.36918e-06
XM_020826146.2	mechanosensitive ion channel protein 6	XR_003701114.1	aly-miR172c-3p	6	0.75	1.36918e-06
XM_020826146.2	mechanosensitive ion channel protein 6	XR_003701114.1	ata-miR172a-3p	6	0.75	1.36918e-06
XM_020826146.2	mechanosensitive ion channel protein 6	XR_003701114.1	csi-miR172a-3p	6	0.75	1.36918e-06
XM_020826146.2	mechanosensitive ion channel protein 6	XR_003701114.1	NW_021390876.1_12379	6	0.75	1.36918e-06
XM_020826146.2	mechanosensitive ion channel protein 6	XR_003701114.1	stu-miR172c-3p	6	0.75	1.36918e-06
XM_020826146.2	mechanosensitive ion channel protein 6	XR_003701392.1	aly-miR172c-3p	3	0.09375	0.00432078
XM_020826233.2	uncharacterized protein At2g38710, transcript variant X2	XR_002305298.2	csi-miR159c-3p	4	0.235294	2.76828e-10
XM_020826233.2	uncharacterized protein At2g38710, transcript variant X2	XR_002305298.2	mes-miR319h	4	0.235294	2.76828e-10
XM_020826233.2	uncharacterized protein At2g38710, transcript variant X2	XR_002305298.2	NW_021320138.1_11162	4	0.235294	2.76828e-10
XM_020826233.2	uncharacterized protein At2g38710, transcript variant X2	XR_002305298.2	ppt-miR319a	4	0.235294	2.76828e-10
XM_020826233.2	uncharacterized protein At2g38710, transcript variant X2	XR_003701426.1	csi-miR159c-3p	3	0.107143	1.49014e-07
XM_020826233.2	uncharacterized protein At2g38710, transcript variant X2	XR_003701426.1	mes-miR319h	3	0.107143	1.49014e-07
XM_020826233.2	uncharacterized protein At2g38710, transcript variant X2	XR_003701426.1	ppt-miR319a	3	0.107143	1.49014e-07
XM_020826233.2	uncharacterized protein At2g38710, transcript variant X2	XR_003702280.1	csi-miR159c-3p	4	0.5	2.76828e-10
XM_020826233.2	uncharacterized protein At2g38710, transcript variant X2	XR_003702280.1	mes-miR319h	4	0.5	2.76828e-10
XM_020826233.2	uncharacterized protein At2g38710, transcript variant X2	XR_003702280.1	NW_021320138.1_11162	4	0.5	2.76828e-10
XM_020826233.2	uncharacterized protein At2g38710, transcript variant X2	XR_003702280.1	ppt-miR319a	4	0.5	2.76828e-10
XM_020826249.2	chalcone--flavonone isomerase	TCONS_00010551	aof-miR395a	3	0.75	3.17353e-06
XM_020826249.2	chalcone--flavonone isomerase	TCONS_00023661	cme-miR395b	3	0.136364	3.17353e-06
XM_020826249.2	chalcone--flavonone isomerase	TCONS_00023668	aof-miR395a	3	0.5	3.17353e-06
XM_020826249.2	chalcone--flavonone isomerase	TCONS_00023668	ata-miR395e-3p	3	0.5	3.17353e-06
XM_020826249.2	chalcone--flavonone isomerase	TCONS_00024832	ata-miR395e-3p	4	0.333333	2.37436e-08
XM_020826249.2	chalcone--flavonone isomerase	TCONS_00024832	cme-miR395b	4	0.333333	2.37436e-08
XM_020826249.2	chalcone--flavonone isomerase	TCONS_00025990	aof-miR395a	5	0.416667	8.32271e-11
XM_020826249.2	chalcone--flavonone isomerase	TCONS_00025990	ata-miR395e-3p	5	0.416667	8.32271e-11
XM_020826249.2	chalcone--flavonone isomerase	TCONS_00025990	cme-miR395b	5	0.416667	8.32271e-11
XM_020826249.2	chalcone--flavonone isomerase	TCONS_00032470	aof-miR395a	3	0.3	3.17353e-06
XM_020826249.2	chalcone--flavonone isomerase	TCONS_00032470	ata-miR395e-3p	3	0.3	3.17353e-06
XM_020826249.2	chalcone--flavonone isomerase	XR_002303785.2	ata-miR395e-3p	3	0.75	3.17353e-06
XM_020826249.2	chalcone--flavonone isomerase	XR_003701379.1	cme-miR395b	4	0.285714	2.37436e-08
XM_020826249.2	chalcone--flavonone isomerase	XR_003701381.1	cme-miR395b	4	0.285714	2.37436e-08
XM_020826346.2	receptor-like protein 7	TCONS_00010551	aof-miR395a	4	1	0.000222286
XM_020826346.2	receptor-like protein 7	TCONS_00010551	osa-miR395b	4	1	0.000222286
XM_020826346.2	receptor-like protein 7	TCONS_00023661	aly-miR395d-3p	7	0.318182	1.61099e-08
XM_020826346.2	receptor-like protein 7	TCONS_00023661	cme-miR395b	7	0.318182	1.61099e-08
XM_020826346.2	receptor-like protein 7	TCONS_00023661	sly-miR395a	7	0.318182	1.61099e-08
XM_020826346.2	receptor-like protein 7	TCONS_00023668	aof-miR395a	6	1	5.34306e-07
XM_020826346.2	receptor-like protein 7	TCONS_00023668	ata-miR395e-3p	6	1	5.34306e-07
XM_020826346.2	receptor-like protein 7	TCONS_00023668	eun-miR395-3p	6	1	5.34306e-07
XM_020826346.2	receptor-like protein 7	TCONS_00024832	aly-miR395d-3p	11	0.916667	4.16891e-16
XM_020826346.2	receptor-like protein 7	TCONS_00024832	ata-miR395e-3p	11	0.916667	4.16891e-16
XM_020826346.2	receptor-like protein 7	TCONS_00024832	cme-miR395b	11	0.916667	4.16891e-16
XM_020826346.2	receptor-like protein 7	TCONS_00024832	eun-miR395-3p	11	0.916667	4.16891e-16
XM_020826346.2	receptor-like protein 7	TCONS_00024832	sly-miR395a	11	0.916667	4.16891e-16
XM_020826346.2	receptor-like protein 7	TCONS_00025156	aly-miR395d-3p	5	1	1.28254e-05
XM_020826346.2	receptor-like protein 7	TCONS_00025156	mdm-miR395l	5	1	1.28254e-05
XM_020826346.2	receptor-like protein 7	TCONS_00025156	sly-miR395a	5	1	1.28254e-05
XM_020826346.2	receptor-like protein 7	TCONS_00025990	aly-miR395d-3p	12	1	1.92357e-18
XM_020826346.2	receptor-like protein 7	TCONS_00025990	aof-miR395a	12	1	1.92357e-18
XM_020826346.2	receptor-like protein 7	TCONS_00025990	ata-miR395e-3p	12	1	1.92357e-18
XM_020826346.2	receptor-like protein 7	TCONS_00025990	cme-miR395b	12	1	1.92357e-18
XM_020826346.2	receptor-like protein 7	TCONS_00025990	eun-miR395-3p	12	1	1.92357e-18
XM_020826346.2	receptor-like protein 7	TCONS_00025990	mdm-miR395l	12	1	1.92357e-18
XM_020826346.2	receptor-like protein 7	TCONS_00025990	osa-miR395b	12	1	1.92357e-18
XM_020826346.2	receptor-like protein 7	TCONS_00025990	sly-miR395a	12	1	1.92357e-18
XM_020826346.2	receptor-like protein 7	TCONS_00032470	aly-miR395d-3p	8	0.8	3.4967e-10
XM_020826346.2	receptor-like protein 7	TCONS_00032470	aof-miR395a	8	0.8	3.4967e-10
XM_020826346.2	receptor-like protein 7	TCONS_00032470	ata-miR395e-3p	8	0.8	3.4967e-10
XM_020826346.2	receptor-like protein 7	TCONS_00032470	sly-miR395a	8	0.8	3.4967e-10
XM_020826346.2	receptor-like protein 7	XR_002303785.2	ata-miR395e-3p	3	0.75	0.00275069
XM_020826346.2	receptor-like protein 7	XR_002304634.2	eun-miR395-3p	5	0.294118	1.28254e-05
XM_020826346.2	receptor-like protein 7	XR_003700116.1	eun-miR395-3p	4	0.16	0.000222286
XM_020826346.2	receptor-like protein 7	XR_003701379.1	aly-miR395d-3p	11	0.785714	4.16891e-16
XM_020826346.2	receptor-like protein 7	XR_003701379.1	cme-miR395b	11	0.785714	4.16891e-16
XM_020826346.2	receptor-like protein 7	XR_003701379.1	eun-miR395-3p	11	0.785714	4.16891e-16
XM_020826346.2	receptor-like protein 7	XR_003701379.1	mdm-miR395l	11	0.785714	4.16891e-16
XM_020826346.2	receptor-like protein 7	XR_003701379.1	osa-miR395b	11	0.785714	4.16891e-16
XM_020826346.2	receptor-like protein 7	XR_003701379.1	sly-miR395a	11	0.785714	4.16891e-16
XM_020826346.2	receptor-like protein 7	XR_003701381.1	aly-miR395d-3p	11	0.785714	4.16891e-16
XM_020826346.2	receptor-like protein 7	XR_003701381.1	cme-miR395b	11	0.785714	4.16891e-16
XM_020826346.2	receptor-like protein 7	XR_003701381.1	eun-miR395-3p	11	0.785714	4.16891e-16
XM_020826346.2	receptor-like protein 7	XR_003701381.1	mdm-miR395l	11	0.785714	4.16891e-16
XM_020826346.2	receptor-like protein 7	XR_003701381.1	osa-miR395b	11	0.785714	4.16891e-16
XM_020826346.2	receptor-like protein 7	XR_003701381.1	sly-miR395a	11	0.785714	4.16891e-16
XM_020826346.2	receptor-like protein 7	XR_003703321.1	aly-miR395d-3p	4	1	0.000222286
XM_020826346.2	receptor-like protein 7	XR_003703321.1	sly-miR395a	4	1	0.000222286
XM_020826355.2	very-long-chain aldehyde decarbonylase GL1-8	TCONS_00018697	aly-miR167a-5p	11	0.916667	1.23695e-15
XM_020826355.2	very-long-chain aldehyde decarbonylase GL1-8	TCONS_00018697	bna-miR167a	11	0.916667	1.23695e-15
XM_020826355.2	very-long-chain aldehyde decarbonylase GL1-8	TCONS_00026869	aly-miR167a-5p	13	0.866667	2.35345e-20
XM_020826355.2	very-long-chain aldehyde decarbonylase GL1-8	TCONS_00026869	bna-miR167a	13	0.866667	2.35345e-20
XM_020826355.2	very-long-chain aldehyde decarbonylase GL1-8	XR_003702199.1	aly-miR167a-5p	13	0.342105	2.35345e-20
XM_020826355.2	very-long-chain aldehyde decarbonylase GL1-8	XR_003702199.1	bna-miR167a	13	0.342105	2.35345e-20
XM_020826355.2	very-long-chain aldehyde decarbonylase GL1-8	XR_003702200.1	aly-miR167a-5p	13	0.361111	2.35345e-20
XM_020826355.2	very-long-chain aldehyde decarbonylase GL1-8	XR_003702200.1	bna-miR167a	13	0.361111	2.35345e-20
XM_020826355.2	very-long-chain aldehyde decarbonylase GL1-8	XR_003702767.1	eun-miR172c-5p	3	0.0833333	0.00345073
XM_020826357.2	probable pectin methylesterase CGR2	TCONS_00023661	aly-miR395d-3p	3	0.136364	1.49014e-07
XM_020826357.2	probable pectin methylesterase CGR2	TCONS_00025156	aly-miR395d-3p	3	0.6	1.49014e-07
XM_020826357.2	probable pectin methylesterase CGR2	XR_003701379.1	aly-miR395d-3p	3	0.214286	1.49014e-07
XM_020826357.2	probable pectin methylesterase CGR2	XR_003701381.1	aly-miR395d-3p	3	0.214286	1.49014e-07
XM_020826440.2	carbonic anhydrase, chloroplastic, transcript variant X2	TCONS_00032841	aly-miR156a-5p	5	0.185185	2.17229e-08
XM_020826440.2	carbonic anhydrase, chloroplastic, transcript variant X2	TCONS_00032841	bna-miR156a	5	0.185185	2.17229e-08
XM_020826440.2	carbonic anhydrase, chloroplastic, transcript variant X2	TCONS_00032841	cca-miR156b	5	0.185185	2.17229e-08
XM_020826440.2	carbonic anhydrase, chloroplastic, transcript variant X2	TCONS_00032841	gma-miR156q	5	0.185185	2.17229e-08
XM_020826440.2	carbonic anhydrase, chloroplastic, transcript variant X2	TCONS_00032841	sly-miR156e-5p	5	0.185185	2.17229e-08
XM_020826440.2	carbonic anhydrase, chloroplastic, transcript variant X2	TCONS_00032842	aly-miR156a-5p	5	0.16129	2.17229e-08
XM_020826440.2	carbonic anhydrase, chloroplastic, transcript variant X2	TCONS_00032842	bna-miR156a	5	0.16129	2.17229e-08
XM_020826440.2	carbonic anhydrase, chloroplastic, transcript variant X2	TCONS_00032842	cca-miR156b	5	0.16129	2.17229e-08
XM_020826440.2	carbonic anhydrase, chloroplastic, transcript variant X2	TCONS_00032842	gma-miR156q	5	0.16129	2.17229e-08
XM_020826440.2	carbonic anhydrase, chloroplastic, transcript variant X2	TCONS_00032842	sly-miR156e-5p	5	0.16129	2.17229e-08
XM_020826440.2	carbonic anhydrase, chloroplastic, transcript variant X2	XR_002303219.2	aly-miR156a-5p	6	0.157895	1.83157e-10
XM_020826440.2	carbonic anhydrase, chloroplastic, transcript variant X2	XR_002303219.2	aly-miR156g-5p	6	0.157895	1.83157e-10
XM_020826440.2	carbonic anhydrase, chloroplastic, transcript variant X2	XR_002303219.2	bna-miR156a	6	0.157895	1.83157e-10
XM_020826440.2	carbonic anhydrase, chloroplastic, transcript variant X2	XR_002303219.2	cca-miR156b	6	0.157895	1.83157e-10
XM_020826440.2	carbonic anhydrase, chloroplastic, transcript variant X2	XR_002303219.2	gma-miR156q	6	0.157895	1.83157e-10
XM_020826440.2	carbonic anhydrase, chloroplastic, transcript variant X2	XR_003701652.1	aly-miR156a-5p	6	0.315789	1.83157e-10
XM_020826440.2	carbonic anhydrase, chloroplastic, transcript variant X2	XR_003701652.1	bna-miR156a	6	0.315789	1.83157e-10
XM_020826440.2	carbonic anhydrase, chloroplastic, transcript variant X2	XR_003701652.1	cca-miR156b	6	0.315789	1.83157e-10
XM_020826440.2	carbonic anhydrase, chloroplastic, transcript variant X2	XR_003701652.1	gma-miR156q	6	0.315789	1.83157e-10
XM_020826440.2	carbonic anhydrase, chloroplastic, transcript variant X2	XR_003702334.1	aly-miR156a-5p	6	0.315789	1.83157e-10
XM_020826440.2	carbonic anhydrase, chloroplastic, transcript variant X2	XR_003702334.1	aly-miR156g-5p	6	0.315789	1.83157e-10
XM_020826440.2	carbonic anhydrase, chloroplastic, transcript variant X2	XR_003702334.1	bna-miR156a	6	0.315789	1.83157e-10
XM_020826440.2	carbonic anhydrase, chloroplastic, transcript variant X2	XR_003702334.1	cca-miR156b	6	0.315789	1.83157e-10
XM_020826440.2	carbonic anhydrase, chloroplastic, transcript variant X2	XR_003702334.1	gma-miR156q	6	0.315789	1.83157e-10
XM_020826440.2	carbonic anhydrase, chloroplastic, transcript variant X2	XR_003702767.1	aly-miR156a-5p	5	0.138889	2.17229e-08
XM_020826440.2	carbonic anhydrase, chloroplastic, transcript variant X2	XR_003702767.1	bna-miR156a	5	0.138889	2.17229e-08
XM_020826440.2	carbonic anhydrase, chloroplastic, transcript variant X2	XR_003702767.1	cca-miR156b	5	0.138889	2.17229e-08
XM_020826440.2	carbonic anhydrase, chloroplastic, transcript variant X2	XR_003702767.1	gma-miR156q	5	0.138889	2.17229e-08
XM_020826440.2	carbonic anhydrase, chloroplastic, transcript variant X2	XR_003702767.1	sly-miR156e-5p	5	0.138889	2.17229e-08
XM_020826453.2	uncharacterized LOC110099336	XR_002305298.2	csi-miR159c-3p	6	0.352941	4.75234e-09
XM_020826453.2	uncharacterized LOC110099336	XR_002305298.2	gma-miR319p	6	0.352941	4.75234e-09
XM_020826453.2	uncharacterized LOC110099336	XR_002305298.2	mes-miR319h	6	0.352941	4.75234e-09
XM_020826453.2	uncharacterized LOC110099336	XR_002305298.2	NW_021320138.1_11162	6	0.352941	4.75234e-09
XM_020826453.2	uncharacterized LOC110099336	XR_002305298.2	ppt-miR319a	6	0.352941	4.75234e-09
XM_020826453.2	uncharacterized LOC110099336	XR_003701426.1	csi-miR159c-3p	4	0.142857	1.1261e-05
XM_020826453.2	uncharacterized LOC110099336	XR_003701426.1	gma-miR319p	4	0.142857	1.1261e-05
XM_020826453.2	uncharacterized LOC110099336	XR_003701426.1	mes-miR319h	4	0.142857	1.1261e-05
XM_020826453.2	uncharacterized LOC110099336	XR_003701426.1	ppt-miR319a	4	0.142857	1.1261e-05
XM_020826453.2	uncharacterized LOC110099336	XR_003702280.1	csi-miR159c-3p	5	0.625	2.855e-07
XM_020826453.2	uncharacterized LOC110099336	XR_003702280.1	gma-miR319p	5	0.625	2.855e-07
XM_020826453.2	uncharacterized LOC110099336	XR_003702280.1	mes-miR319h	5	0.625	2.855e-07
XM_020826453.2	uncharacterized LOC110099336	XR_003702280.1	NW_021320138.1_11162	5	0.625	2.855e-07
XM_020826453.2	uncharacterized LOC110099336	XR_003702280.1	ppt-miR319a	5	0.625	2.855e-07
XM_020826487.2	dnaJ protein homolog	TCONS_00005590	bdi-miR159b-3p.1	8	0.727273	3.35224e-13
XM_020826487.2	dnaJ protein homolog	TCONS_00031314	bdi-miR159b-3p.1	9	0.473684	1.27164e-15
XM_020826487.2	dnaJ protein homolog	TCONS_00031314	gma-miR319p	9	0.473684	1.27164e-15
XM_020826487.2	dnaJ protein homolog	TCONS_00032841	bdi-miR159b-3p.1	4	0.148148	1.1261e-05
XM_020826487.2	dnaJ protein homolog	TCONS_00032842	bdi-miR159b-3p.1	4	0.129032	1.1261e-05
XM_020826487.2	dnaJ protein homolog	XR_002303623.2	bdi-miR159b-3p.1	4	0.153846	1.1261e-05
XM_020826487.2	dnaJ protein homolog	XR_002303625.2	bdi-miR159b-3p.1	4	0.153846	1.1261e-05
XM_020826487.2	dnaJ protein homolog	XR_002305298.2	gma-miR319p	5	0.294118	2.855e-07
XM_020826487.2	dnaJ protein homolog	XR_003701426.1	bdi-miR159b-3p.1	8	0.285714	3.35224e-13
XM_020826487.2	dnaJ protein homolog	XR_003701426.1	gma-miR319p	8	0.285714	3.35224e-13
XM_020826487.2	dnaJ protein homolog	XR_003702492.1	bdi-miR159b-3p.1	4	0.153846	1.1261e-05
XM_020826487.2	dnaJ protein homolog	XR_003702493.1	bdi-miR159b-3p.1	4	0.153846	1.1261e-05
XM_020826714.2	chloride channel protein CLC-c, transcript variant X2	TCONS_00005590	aly-miR159c-3p	8	0.727273	3.53516e-06
XM_020826714.2	chloride channel protein CLC-c, transcript variant X2	TCONS_00005590	bdi-miR159b-3p.1	8	0.727273	3.53516e-06
XM_020826714.2	chloride channel protein CLC-c, transcript variant X2	TCONS_00031314	aly-miR159c-3p	7	0.368421	3.94368e-05
XM_020826714.2	chloride channel protein CLC-c, transcript variant X2	TCONS_00031314	bdi-miR159b-3p.1	7	0.368421	3.94368e-05
XM_020826714.2	chloride channel protein CLC-c, transcript variant X2	TCONS_00031314	gma-miR319p	7	0.368421	3.94368e-05
XM_020826714.2	chloride channel protein CLC-c, transcript variant X2	TCONS_00032841	aly-miR159c-3p	4	0.148148	0.0139075
XM_020826714.2	chloride channel protein CLC-c, transcript variant X2	TCONS_00032841	bdi-miR159b-3p.1	4	0.148148	0.0139075
XM_020826714.2	chloride channel protein CLC-c, transcript variant X2	TCONS_00032841	pta-miR159a	4	0.148148	0.0139075
XM_020826714.2	chloride channel protein CLC-c, transcript variant X2	TCONS_00032842	aly-miR159c-3p	6	0.193548	0.00035211
XM_020826714.2	chloride channel protein CLC-c, transcript variant X2	TCONS_00032842	bdi-miR159b-3p.1	6	0.193548	0.00035211
XM_020826714.2	chloride channel protein CLC-c, transcript variant X2	TCONS_00032842	bdi-miR529-5p	6	0.193548	0.00035211
XM_020826714.2	chloride channel protein CLC-c, transcript variant X2	TCONS_00032842	ppt-miR529e	6	0.193548	0.00035211
XM_020826714.2	chloride channel protein CLC-c, transcript variant X2	TCONS_00032842	pta-miR159a	6	0.193548	0.00035211
XM_020826714.2	chloride channel protein CLC-c, transcript variant X2	XR_002303623.2	aly-miR159c-3p	7	0.269231	3.94368e-05
XM_020826714.2	chloride channel protein CLC-c, transcript variant X2	XR_002303623.2	bdi-miR159b-3p.1	7	0.269231	3.94368e-05
XM_020826714.2	chloride channel protein CLC-c, transcript variant X2	XR_002303623.2	bdi-miR529-5p	7	0.269231	3.94368e-05
XM_020826714.2	chloride channel protein CLC-c, transcript variant X2	XR_002303623.2	ppt-miR529e	7	0.269231	3.94368e-05
XM_020826714.2	chloride channel protein CLC-c, transcript variant X2	XR_002303625.2	aly-miR159c-3p	7	0.269231	3.94368e-05
XM_020826714.2	chloride channel protein CLC-c, transcript variant X2	XR_002303625.2	bdi-miR159b-3p.1	7	0.269231	3.94368e-05
XM_020826714.2	chloride channel protein CLC-c, transcript variant X2	XR_002303625.2	bdi-miR529-5p	7	0.269231	3.94368e-05
XM_020826714.2	chloride channel protein CLC-c, transcript variant X2	XR_002303625.2	ppt-miR529e	7	0.269231	3.94368e-05
XM_020826714.2	chloride channel protein CLC-c, transcript variant X2	XR_002305298.2	gma-miR319p	4	0.235294	0.0139075
XM_020826714.2	chloride channel protein CLC-c, transcript variant X2	XR_003700791.1	aly-miR390a-5p	4	0.571429	0.0139075
XM_020826714.2	chloride channel protein CLC-c, transcript variant X2	XR_003701426.1	aau-miR319	13	0.464286	7.82158e-13
XM_020826714.2	chloride channel protein CLC-c, transcript variant X2	XR_003701426.1	aly-miR159c-3p	13	0.464286	7.82158e-13
XM_020826714.2	chloride channel protein CLC-c, transcript variant X2	XR_003701426.1	atr-miR319a	13	0.464286	7.82158e-13
XM_020826714.2	chloride channel protein CLC-c, transcript variant X2	XR_003701426.1	bdi-miR159b-3p.1	13	0.464286	7.82158e-13
XM_020826714.2	chloride channel protein CLC-c, transcript variant X2	XR_003701426.1	cme-miR319c	13	0.464286	7.82158e-13
XM_020826714.2	chloride channel protein CLC-c, transcript variant X2	XR_003701426.1	gma-miR319g	13	0.464286	7.82158e-13
XM_020826714.2	chloride channel protein CLC-c, transcript variant X2	XR_003701426.1	gma-miR319p	13	0.464286	7.82158e-13
XM_020826714.2	chloride channel protein CLC-c, transcript variant X2	XR_003701426.1	mtr-miR319c-3p	13	0.464286	7.82158e-13
XM_020826714.2	chloride channel protein CLC-c, transcript variant X2	XR_003701426.1	pta-miR319	13	0.464286	7.82158e-13
XM_020826714.2	chloride channel protein CLC-c, transcript variant X2	XR_003702492.1	aly-miR159c-3p	7	0.269231	3.94368e-05
XM_020826714.2	chloride channel protein CLC-c, transcript variant X2	XR_003702492.1	bdi-miR159b-3p.1	7	0.269231	3.94368e-05
XM_020826714.2	chloride channel protein CLC-c, transcript variant X2	XR_003702492.1	bdi-miR529-5p	7	0.269231	3.94368e-05
XM_020826714.2	chloride channel protein CLC-c, transcript variant X2	XR_003702492.1	ppt-miR529e	7	0.269231	3.94368e-05
XM_020826714.2	chloride channel protein CLC-c, transcript variant X2	XR_003702493.1	aly-miR159c-3p	7	0.269231	3.94368e-05
XM_020826714.2	chloride channel protein CLC-c, transcript variant X2	XR_003702493.1	bdi-miR159b-3p.1	7	0.269231	3.94368e-05
XM_020826714.2	chloride channel protein CLC-c, transcript variant X2	XR_003702493.1	bdi-miR529-5p	7	0.269231	3.94368e-05
XM_020826714.2	chloride channel protein CLC-c, transcript variant X2	XR_003702493.1	ppt-miR529e	7	0.269231	3.94368e-05
XM_020826812.2	phytochrome-interacting ankyrin-repeat protein 2	XR_003702837.1	aly-miR166a-5p	3	0.333333	1.66495e-08
XM_020826820.2	ABC transporter B family member 13-like	TCONS_00024879	aly-miR160a-5p	8	0.727273	1.57397e-11
XM_020826820.2	ABC transporter B family member 13-like	TCONS_00024879	csi-miR160c-5p	8	0.727273	1.57397e-11
XM_020826820.2	ABC transporter B family member 13-like	TCONS_00024879	mes-miR160g	8	0.727273	1.57397e-11
XM_020826820.2	ABC transporter B family member 13-like	TCONS_00024879	mes-miR160h	8	0.727273	1.57397e-11
XM_020826820.2	ABC transporter B family member 13-like	TCONS_00033747	bcy-miR156	3	0.1875	0.000990661
XM_020826820.2	ABC transporter B family member 13-like	TCONS_00033747	gma-miR156e	3	0.1875	0.000990661
XM_020826820.2	ABC transporter B family member 13-like	TCONS_00033747	gma-miR156r	3	0.1875	0.000990661
XM_020826970.2	LRR receptor-like serine/threonine-protein kinase GHR1	XR_003700791.1	aly-miR390a-5p	3	0.428571	2.75137e-05
XM_020827033.2	B3 domain-containing protein Os07g0563300, transcript variant X3	TCONS_00000917	aly-miR168a-5p	6	0.6	4.75234e-09
XM_020827033.2	B3 domain-containing protein Os07g0563300, transcript variant X3	TCONS_00000917	bra-miR168b-5p	6	0.6	4.75234e-09
XM_020827033.2	B3 domain-containing protein Os07g0563300, transcript variant X3	TCONS_00000917	lja-miR168-5p	6	0.6	4.75234e-09
XM_020827033.2	B3 domain-containing protein Os07g0563300, transcript variant X3	XR_003703113.1	aly-miR168a-5p	6	0.461538	4.75234e-09
XM_020827033.2	B3 domain-containing protein Os07g0563300, transcript variant X3	XR_003703113.1	bra-miR168b-5p	6	0.461538	4.75234e-09
XM_020827033.2	B3 domain-containing protein Os07g0563300, transcript variant X3	XR_003703113.1	lja-miR168-5p	6	0.461538	4.75234e-09
XM_020827067.2	brefeldin A-inhibited guanine nucleotide-exchange protein 5, transcript variant X1	TCONS_00018697	aly-miR167a-5p	6	0.5	0.000203437
XM_020827067.2	brefeldin A-inhibited guanine nucleotide-exchange protein 5, transcript variant X1	TCONS_00018697	bna-miR167a	6	0.5	0.000203437
XM_020827067.2	brefeldin A-inhibited guanine nucleotide-exchange protein 5, transcript variant X1	TCONS_00026869	aly-miR167a-5p	7	0.466667	2.03931e-05
XM_020827067.2	brefeldin A-inhibited guanine nucleotide-exchange protein 5, transcript variant X1	TCONS_00026869	bna-miR167a	7	0.466667	2.03931e-05
XM_020827067.2	brefeldin A-inhibited guanine nucleotide-exchange protein 5, transcript variant X1	XR_003702199.1	aly-miR167a-5p	8	0.210526	1.62525e-06
XM_020827067.2	brefeldin A-inhibited guanine nucleotide-exchange protein 5, transcript variant X1	XR_003702199.1	bna-miR167a	8	0.210526	1.62525e-06
XM_020827094.2	protein gar2	TCONS_00018019	aof-miR319b	4	0.8	0.0045953
XM_020827094.2	protein gar2	XR_003699683.1	aof-miR319b	3	0.333333	0.0264865
XM_020827209.2	protein DMR6-LIKE OXYGENASE 2	TCONS_00017118	cca-miR396a-3p	4	0.666667	1.53309e-06
XM_020827209.2	protein DMR6-LIKE OXYGENASE 2	TCONS_00017118	cca-miR396c	4	0.666667	1.53309e-06
XM_020827209.2	protein DMR6-LIKE OXYGENASE 2	TCONS_00024929	cca-miR396a-3p	3	1	6.63062e-05
XM_020827209.2	protein DMR6-LIKE OXYGENASE 2	TCONS_00024929	csi-miR396a-3p	3	1	6.63062e-05
XM_020827209.2	protein DMR6-LIKE OXYGENASE 2	XR_002303327.2	cca-miR396a-3p	9	0.428571	1.91363e-18
XM_020827209.2	protein DMR6-LIKE OXYGENASE 2	XR_002303327.2	cca-miR396c	9	0.428571	1.91363e-18
XM_020827209.2	protein DMR6-LIKE OXYGENASE 2	XR_002303327.2	csi-miR396a-3p	9	0.428571	1.91363e-18
XM_020827209.2	protein DMR6-LIKE OXYGENASE 2	XR_003702199.1	csi-miR396a-3p	4	0.105263	1.53309e-06
XM_020827209.2	protein DMR6-LIKE OXYGENASE 2	XR_003702200.1	csi-miR396a-3p	4	0.111111	1.53309e-06
XM_020827209.2	protein DMR6-LIKE OXYGENASE 2	XR_003702334.1	cca-miR396a-3p	4	0.210526	1.53309e-06
XM_020827209.2	protein DMR6-LIKE OXYGENASE 2	XR_003702334.1	cca-miR396c	4	0.210526	1.53309e-06
XM_020827209.2	protein DMR6-LIKE OXYGENASE 2	XR_003702334.1	csi-miR396a-3p	4	0.210526	1.53309e-06
XM_020827209.2	protein DMR6-LIKE OXYGENASE 2	XR_003703248.1	cca-miR396a-3p	3	0.6	6.63062e-05
XM_020827233.2	myb-related protein MYBAS1-like	TCONS_00017098	aqc-miR172b	5	0.357143	5.23294e-12
XM_020827311.2	protein SRC2 homolog	TCONS_00024832	aly-miR395d-3p	4	0.333333	0
XM_020827311.2	protein SRC2 homolog	TCONS_00024832	ata-miR395e-3p	4	0.333333	0
XM_020827311.2	protein SRC2 homolog	TCONS_00025990	aly-miR395d-3p	4	0.333333	0
XM_020827311.2	protein SRC2 homolog	TCONS_00025990	ata-miR395e-3p	4	0.333333	0
XM_020827311.2	protein SRC2 homolog	TCONS_00025990	mdm-miR395l	4	0.333333	0
XM_020827311.2	protein SRC2 homolog	TCONS_00025990	osa-miR395b	4	0.333333	0
XM_020827311.2	protein SRC2 homolog	TCONS_00032470	aly-miR395d-3p	3	0.3	6.67213e-10
XM_020827311.2	protein SRC2 homolog	TCONS_00032470	ata-miR395e-3p	3	0.3	6.67213e-10
XM_020827311.2	protein SRC2 homolog	XR_003701379.1	aly-miR395d-3p	3	0.214286	6.67213e-10
XM_020827311.2	protein SRC2 homolog	XR_003701379.1	mdm-miR395l	3	0.214286	6.67213e-10
XM_020827311.2	protein SRC2 homolog	XR_003701379.1	osa-miR395b	3	0.214286	6.67213e-10
XM_020827311.2	protein SRC2 homolog	XR_003701381.1	aly-miR395d-3p	3	0.214286	6.67213e-10
XM_020827311.2	protein SRC2 homolog	XR_003701381.1	mdm-miR395l	3	0.214286	6.67213e-10
XM_020827311.2	protein SRC2 homolog	XR_003701381.1	osa-miR395b	3	0.214286	6.67213e-10
XM_020827399.2	actin	TCONS_00000010	bdi-miR529-5p	3	0.3	0.00966995
XM_020827399.2	actin	TCONS_00000010	ppt-miR529e	3	0.3	0.00966995
XM_020827399.2	actin	TCONS_00010963	bdi-miR529-5p	3	1	0.00966995
XM_020827399.2	actin	TCONS_00010963	ppt-miR529e	3	1	0.00966995
XM_020827399.2	actin	TCONS_00018697	aly-miR167a-5p	11	0.916667	1.58459e-13
XM_020827399.2	actin	TCONS_00018697	bna-miR167a	11	0.916667	1.58459e-13
XM_020827399.2	actin	TCONS_00026869	aly-miR167a-5p	14	0.933333	9.36109e-20
XM_020827399.2	actin	TCONS_00026869	bna-miR167a	14	0.933333	9.36109e-20
XM_020827399.2	actin	TCONS_00027795	bdi-miR529-5p	3	1	0.00966995
XM_020827399.2	actin	TCONS_00027795	ppt-miR529e	3	1	0.00966995
XM_020827399.2	actin	TCONS_00032842	bdi-miR529-5p	4	0.129032	0.00118814
XM_020827399.2	actin	TCONS_00032842	ppt-miR529e	4	0.129032	0.00118814
XM_020827399.2	actin	TCONS_00034483	bdi-miR529-5p	4	0.285714	0.00118814
XM_020827399.2	actin	TCONS_00034483	ppt-miR529e	4	0.285714	0.00118814
XM_020827399.2	actin	TCONS_00035884	bdi-miR529-5p	4	0.333333	0.00118814
XM_020827399.2	actin	TCONS_00035884	ppt-miR529e	4	0.333333	0.00118814
XM_020827399.2	actin	TCONS_00036429	bdi-miR529-5p	3	0.214286	0.00966995
XM_020827399.2	actin	TCONS_00036429	ppt-miR529e	3	0.214286	0.00966995
XM_020827399.2	actin	XR_002303623.2	bdi-miR529-5p	3	0.115385	0.00966995
XM_020827399.2	actin	XR_002303623.2	ppt-miR529e	3	0.115385	0.00966995
XM_020827399.2	actin	XR_002303625.2	bdi-miR529-5p	3	0.115385	0.00966995
XM_020827399.2	actin	XR_002303625.2	ppt-miR529e	3	0.115385	0.00966995
XM_020827399.2	actin	XR_002304893.2	bdi-miR529-5p	3	0.428571	0.00966995
XM_020827399.2	actin	XR_002304893.2	ppt-miR529e	3	0.428571	0.00966995
XM_020827399.2	actin	XR_002304993.2	bdi-miR529-5p	3	0.75	0.00966995
XM_020827399.2	actin	XR_002304993.2	ppt-miR529e	3	0.75	0.00966995
XM_020827399.2	actin	XR_002305222.2	bdi-miR529-5p	3	1	0.00966995
XM_020827399.2	actin	XR_002305222.2	ppt-miR529e	3	1	0.00966995
XM_020827399.2	actin	XR_003700878.1	bdi-miR529-5p	3	0.75	0.00966995
XM_020827399.2	actin	XR_003700878.1	ppt-miR529e	3	0.75	0.00966995
XM_020827399.2	actin	XR_003702199.1	aly-miR167a-5p	13	0.342105	1.61028e-17
XM_020827399.2	actin	XR_003702199.1	bna-miR167a	13	0.342105	1.61028e-17
XM_020827399.2	actin	XR_003702200.1	aly-miR167a-5p	13	0.361111	1.61028e-17
XM_020827399.2	actin	XR_003702200.1	bna-miR167a	13	0.361111	1.61028e-17
XM_020827399.2	actin	XR_003702413.1	bdi-miR529-5p	5	0.294118	0.000107866
XM_020827399.2	actin	XR_003702413.1	ppt-miR529e	5	0.294118	0.000107866
XM_020827399.2	actin	XR_003702492.1	bdi-miR529-5p	3	0.115385	0.00966995
XM_020827399.2	actin	XR_003702492.1	ppt-miR529e	3	0.115385	0.00966995
XM_020827399.2	actin	XR_003702493.1	bdi-miR529-5p	3	0.115385	0.00966995
XM_020827399.2	actin	XR_003702493.1	ppt-miR529e	3	0.115385	0.00966995
XM_020827399.2	actin	XR_003702767.1	bdi-miR529-5p	5	0.138889	0.000107866
XM_020827399.2	actin	XR_003702767.1	ppt-miR529e	5	0.138889	0.000107866
XM_020827449.2	lysine histidine transporter-like 8	XR_003702596.1	eun-miR172c-5p	3	0.12	1.59864e-06
XM_020827449.2	lysine histidine transporter-like 8	XR_003702767.1	eun-miR172c-5p	4	0.111111	8.95587e-09
XM_020827449.2	lysine histidine transporter-like 8	XR_003702767.1	mdm-miR535d	4	0.111111	8.95587e-09
XM_020827466.2	uncharacterized LOC110100073	XR_003701426.1	aau-miR319	7	0.25	8.6394e-13
XM_020827466.2	uncharacterized LOC110100073	XR_003701426.1	aly-miR319c-3p	7	0.25	8.6394e-13
XM_020827466.2	uncharacterized LOC110100073	XR_003701426.1	atr-miR319a	7	0.25	8.6394e-13
XM_020827466.2	uncharacterized LOC110100073	XR_003701426.1	cme-miR319c	7	0.25	8.6394e-13
XM_020827466.2	uncharacterized LOC110100073	XR_003701426.1	gma-miR319p	7	0.25	8.6394e-13
XM_020827466.2	uncharacterized LOC110100073	XR_003701426.1	mtr-miR319c-3p	7	0.25	8.6394e-13
XM_020827466.2	uncharacterized LOC110100073	XR_003701426.1	pta-miR319	7	0.25	8.6394e-13
XM_020827605.2	mitochondrial carnitine/acylcarnitine carrier-like protein	TCONS_00027061	aly-miR171a-3p	3	1	8.03797e-07
XM_020827605.2	mitochondrial carnitine/acylcarnitine carrier-like protein	TCONS_00027061	bna-miR171g	3	1	8.03797e-07
XM_020827722.2	transmembrane 9 superfamily member 11	TCONS_00000071	aly-miR156g-5p	3	0.375	0.0193834
XM_020827722.2	transmembrane 9 superfamily member 11	TCONS_00000071	sbi-miR156e	3	0.375	0.0193834
XM_020827722.2	transmembrane 9 superfamily member 11	TCONS_00029329	bdi-miR156a	4	0.5	0.0030178
XM_020827722.2	transmembrane 9 superfamily member 11	TCONS_00029329	fve-miR156b	4	0.5	0.0030178
XM_020827722.2	transmembrane 9 superfamily member 11	TCONS_00029329	fve-miR156h	4	0.5	0.0030178
XM_020827722.2	transmembrane 9 superfamily member 11	TCONS_00032841	aly-miR156a-5p	7	0.259259	2.17924e-06
XM_020827722.2	transmembrane 9 superfamily member 11	TCONS_00032841	bna-miR156a	7	0.259259	2.17924e-06
XM_020827722.2	transmembrane 9 superfamily member 11	TCONS_00032841	cca-miR156b	7	0.259259	2.17924e-06
XM_020827722.2	transmembrane 9 superfamily member 11	TCONS_00032841	gma-miR156q	7	0.259259	2.17924e-06
XM_020827722.2	transmembrane 9 superfamily member 11	TCONS_00032841	sly-miR156e-5p	7	0.259259	2.17924e-06
XM_020827722.2	transmembrane 9 superfamily member 11	TCONS_00032842	aly-miR156a-5p	7	0.225806	2.17924e-06
XM_020827722.2	transmembrane 9 superfamily member 11	TCONS_00032842	bna-miR156a	7	0.225806	2.17924e-06
XM_020827722.2	transmembrane 9 superfamily member 11	TCONS_00032842	cca-miR156b	7	0.225806	2.17924e-06
XM_020827722.2	transmembrane 9 superfamily member 11	TCONS_00032842	gma-miR156q	7	0.225806	2.17924e-06
XM_020827722.2	transmembrane 9 superfamily member 11	TCONS_00032842	sbi-miR156e	7	0.225806	2.17924e-06
XM_020827722.2	transmembrane 9 superfamily member 11	TCONS_00032842	sly-miR156e-5p	7	0.225806	2.17924e-06
XM_020827722.2	transmembrane 9 superfamily member 11	TCONS_00036429	bdi-miR156a	3	0.214286	0.0193834
XM_020827722.2	transmembrane 9 superfamily member 11	TCONS_00036429	sly-miR156e-5p	3	0.214286	0.0193834
XM_020827722.2	transmembrane 9 superfamily member 11	XR_002303219.2	aly-miR156a-5p	12	0.315789	7.26539e-14
XM_020827722.2	transmembrane 9 superfamily member 11	XR_002303219.2	aly-miR156g-5p	12	0.315789	7.26539e-14
XM_020827722.2	transmembrane 9 superfamily member 11	XR_002303219.2	bdi-miR156a	12	0.315789	7.26539e-14
XM_020827722.2	transmembrane 9 superfamily member 11	XR_002303219.2	bna-miR156a	12	0.315789	7.26539e-14
XM_020827722.2	transmembrane 9 superfamily member 11	XR_002303219.2	cca-miR156b	12	0.315789	7.26539e-14
XM_020827722.2	transmembrane 9 superfamily member 11	XR_002303219.2	gma-miR156q	12	0.315789	7.26539e-14
XM_020827722.2	transmembrane 9 superfamily member 11	XR_002303219.2	pab-miR156b	12	0.315789	7.26539e-14
XM_020827722.2	transmembrane 9 superfamily member 11	XR_002303219.2	sbi-miR156e	12	0.315789	7.26539e-14
XM_020827722.2	transmembrane 9 superfamily member 11	XR_003700116.1	bdi-miR156a	4	0.16	0.0030178
XM_020827722.2	transmembrane 9 superfamily member 11	XR_003701135.1	bdi-miR156a	3	0.3	0.0193834
XM_020827722.2	transmembrane 9 superfamily member 11	XR_003701652.1	aly-miR156a-5p	9	0.473684	4.84163e-09
XM_020827722.2	transmembrane 9 superfamily member 11	XR_003701652.1	bna-miR156a	9	0.473684	4.84163e-09
XM_020827722.2	transmembrane 9 superfamily member 11	XR_003701652.1	cca-miR156b	9	0.473684	4.84163e-09
XM_020827722.2	transmembrane 9 superfamily member 11	XR_003701652.1	gma-miR156q	9	0.473684	4.84163e-09
XM_020827722.2	transmembrane 9 superfamily member 11	XR_003701652.1	mtr-miR156j	9	0.473684	4.84163e-09
XM_020827722.2	transmembrane 9 superfamily member 11	XR_003701652.1	pab-miR156b	9	0.473684	4.84163e-09
XM_020827722.2	transmembrane 9 superfamily member 11	XR_003702334.1	aly-miR156a-5p	11	0.578947	3.85302e-12
XM_020827722.2	transmembrane 9 superfamily member 11	XR_003702334.1	aly-miR156g-5p	11	0.578947	3.85302e-12
XM_020827722.2	transmembrane 9 superfamily member 11	XR_003702334.1	bdi-miR156a	11	0.578947	3.85302e-12
XM_020827722.2	transmembrane 9 superfamily member 11	XR_003702334.1	bna-miR156a	11	0.578947	3.85302e-12
XM_020827722.2	transmembrane 9 superfamily member 11	XR_003702334.1	cca-miR156b	11	0.578947	3.85302e-12
XM_020827722.2	transmembrane 9 superfamily member 11	XR_003702334.1	gma-miR156q	11	0.578947	3.85302e-12
XM_020827722.2	transmembrane 9 superfamily member 11	XR_003702334.1	pab-miR156b	11	0.578947	3.85302e-12
XM_020827722.2	transmembrane 9 superfamily member 11	XR_003702767.1	aly-miR156a-5p	7	0.194444	2.17924e-06
XM_020827722.2	transmembrane 9 superfamily member 11	XR_003702767.1	bna-miR156a	7	0.194444	2.17924e-06
XM_020827722.2	transmembrane 9 superfamily member 11	XR_003702767.1	cca-miR156b	7	0.194444	2.17924e-06
XM_020827722.2	transmembrane 9 superfamily member 11	XR_003702767.1	gma-miR156q	7	0.194444	2.17924e-06
XM_020827722.2	transmembrane 9 superfamily member 11	XR_003702767.1	sly-miR156e-5p	7	0.194444	2.17924e-06
XM_020827761.2	uncharacterized LOC110100317	TCONS_00010551	aof-miR395a	3	0.75	1.01109e-05
XM_020827761.2	uncharacterized LOC110100317	TCONS_00010551	osa-miR395b	3	0.75	1.01109e-05
XM_020827761.2	uncharacterized LOC110100317	TCONS_00023661	aly-miR395d-3p	4	0.181818	1.18576e-07
[truncated: 4,888 more rows]

## Sheet: ceRNA_lnc_above10
mRNA	mRNA_description	lncRNA	Shared_miRNA	Shared_miRNA_Number	CeRNA_Score	Pvalue
XM_020816635.2	transcription elongation factor SPT6 homolog, transcript variant X2	TCONS_00026869	aly-miR167a-5p	14	0.933333	9.36109e-20
XM_020816635.2	transcription elongation factor SPT6 homolog, transcript variant X2	TCONS_00026869	bna-miR167a	14	0.933333	9.36109e-20
XM_020816635.2	transcription elongation factor SPT6 homolog, transcript variant X2	XR_003702199.1	aly-miR167a-5p	12	0.315789	1.89604e-15
XM_020816635.2	transcription elongation factor SPT6 homolog, transcript variant X2	XR_003702199.1	bna-miR167a	12	0.315789	1.89604e-15
XM_020816635.2	transcription elongation factor SPT6 homolog, transcript variant X2	XR_003702200.1	aly-miR167a-5p	12	0.333333	1.89604e-15
XM_020816635.2	transcription elongation factor SPT6 homolog, transcript variant X2	XR_003702200.1	bna-miR167a	12	0.333333	1.89604e-15
XM_020816635.2	transcription elongation factor SPT6 homolog, transcript variant X2	TCONS_00018697	aly-miR167a-5p	11	0.916667	1.58459e-13
XM_020816635.2	transcription elongation factor SPT6 homolog, transcript variant X2	TCONS_00018697	bna-miR167a	11	0.916667	1.58459e-13
XM_020816968.2	protein TSS	TCONS_00026869	aly-miR167a-5p	13	0.866667	0.000470223
XM_020816968.2	protein TSS	TCONS_00026869	bna-miR167a	13	0.866667	0.000470223
XM_020816968.2	protein TSS	TCONS_00032841	aly-miR159c-3p	13	0.481481	0.000470223
XM_020816968.2	protein TSS	TCONS_00032841	bdi-miR159a-3p	13	0.481481	0.000470223
XM_020816968.2	protein TSS	TCONS_00032841	cme-miR159b	13	0.481481	0.000470223
XM_020816968.2	protein TSS	TCONS_00032841	cpa-miR159b	13	0.481481	0.000470223
XM_020816968.2	protein TSS	TCONS_00032841	fve-miR159c	13	0.481481	0.000470223
XM_020816968.2	protein TSS	TCONS_00032841	osa-miR159d	13	0.481481	0.000470223
XM_020816968.2	protein TSS	TCONS_00032841	osa-miR159f	13	0.481481	0.000470223
XM_020816968.2	protein TSS	TCONS_00032841	pta-miR159a	13	0.481481	0.000470223
XM_020816968.2	protein TSS	TCONS_00032841	pta-miR159c	13	0.481481	0.000470223
XM_020816968.2	protein TSS	TCONS_00032841	ptc-miR159d	13	0.481481	0.000470223
XM_020816968.2	protein TSS	TCONS_00032842	aly-miR159c-3p	13	0.419355	0.000470223
XM_020816968.2	protein TSS	TCONS_00032842	bdi-miR159a-3p	13	0.419355	0.000470223
XM_020816968.2	protein TSS	TCONS_00032842	cme-miR159b	13	0.419355	0.000470223
XM_020816968.2	protein TSS	TCONS_00032842	cpa-miR159b	13	0.419355	0.000470223
XM_020816968.2	protein TSS	TCONS_00032842	fve-miR159c	13	0.419355	0.000470223
XM_020816968.2	protein TSS	TCONS_00032842	osa-miR159d	13	0.419355	0.000470223
XM_020816968.2	protein TSS	TCONS_00032842	osa-miR159f	13	0.419355	0.000470223
XM_020816968.2	protein TSS	TCONS_00032842	pta-miR159a	13	0.419355	0.000470223
XM_020816968.2	protein TSS	TCONS_00032842	pta-miR159c	13	0.419355	0.000470223
XM_020816968.2	protein TSS	TCONS_00032842	ptc-miR159d	13	0.419355	0.000470223
XM_020816968.2	protein TSS	XR_003702199.1	aly-miR167a-5p	13	0.342105	0.000470223
XM_020816968.2	protein TSS	XR_003702199.1	bna-miR167a	13	0.342105	0.000470223
XM_020816968.2	protein TSS	TCONS_00017086	cme-miR159b	12	0.705882	0.00175771
XM_020816968.2	protein TSS	TCONS_00017086	cpa-miR159b	12	0.705882	0.00175771
XM_020816968.2	protein TSS	TCONS_00017086	fve-miR159c	12	0.705882	0.00175771
XM_020816968.2	protein TSS	TCONS_00017086	osa-miR159c	12	0.705882	0.00175771
XM_020816968.2	protein TSS	TCONS_00017086	osa-miR159d	12	0.705882	0.00175771
XM_020816968.2	protein TSS	TCONS_00017086	pta-miR159c	12	0.705882	0.00175771
XM_020816968.2	protein TSS	TCONS_00017086	ptc-miR159d	12	0.705882	0.00175771
XM_020816968.2	protein TSS	XR_003702200.1	aly-miR167a-5p	12	0.333333	0.00175771
XM_020816968.2	protein TSS	XR_003702200.1	bna-miR167a	12	0.333333	0.00175771
XM_020816968.2	protein TSS	TCONS_00018697	aly-miR167a-5p	11	0.916667	0.00581456
XM_020816968.2	protein TSS	TCONS_00018697	bna-miR167a	11	0.916667	0.00581456
XM_020816968.2	protein TSS	XR_002305298.2	bdi-miR159a-3p	10	0.588235	0.0169849
XM_020816968.2	protein TSS	XR_002305298.2	cpa-miR159b	10	0.588235	0.0169849
XM_020816968.2	protein TSS	XR_002305298.2	gma-miR319p	10	0.588235	0.0169849
XM_020816968.2	protein TSS	XR_002305298.2	osa-miR159f	10	0.588235	0.0169849
XM_020816968.2	protein TSS	XR_002305298.2	pta-miR159c	10	0.588235	0.0169849
XM_020816968.2	protein TSS	XR_002305298.2	ptc-miR159d	10	0.588235	0.0169849
XM_020816968.2	protein TSS	XR_003701426.1	aau-miR319	10	0.357143	0.0169849
XM_020816968.2	protein TSS	XR_003701426.1	aly-miR159c-3p	10	0.357143	0.0169849
XM_020816968.2	protein TSS	XR_003701426.1	gma-miR319g	10	0.357143	0.0169849
XM_020816968.2	protein TSS	XR_003701426.1	gma-miR319p	10	0.357143	0.0169849
XM_020816968.2	protein TSS	XR_003701426.1	mtr-miR319c-3p	10	0.357143	0.0169849
XM_020817200.2	60S ribosomal protein L3, transcript variant X1	XR_002303327.2	cca-miR396a-3p	10	0.47619	2.46264e-18
XM_020817200.2	60S ribosomal protein L3, transcript variant X1	XR_002303327.2	cca-miR396c	10	0.47619	2.46264e-18
XM_020817506.2	alpha-1,4 glucan phosphorylase L isozyme, chloroplastic/amyloplastic, transcript variant X2	TCONS_00032841	aly-miR159c-3p	15	0.555556	3.27852e-10
XM_020817506.2	alpha-1,4 glucan phosphorylase L isozyme, chloroplastic/amyloplastic, transcript variant X2	TCONS_00032841	bdi-miR159a-3p	15	0.555556	3.27852e-10
XM_020817506.2	alpha-1,4 glucan phosphorylase L isozyme, chloroplastic/amyloplastic, transcript variant X2	TCONS_00032841	cme-miR159b	15	0.555556	3.27852e-10
XM_020817506.2	alpha-1,4 glucan phosphorylase L isozyme, chloroplastic/amyloplastic, transcript variant X2	TCONS_00032841	cpa-miR159b	15	0.555556	3.27852e-10
XM_020817506.2	alpha-1,4 glucan phosphorylase L isozyme, chloroplastic/amyloplastic, transcript variant X2	TCONS_00032841	fve-miR159c	15	0.555556	3.27852e-10
XM_020817506.2	alpha-1,4 glucan phosphorylase L isozyme, chloroplastic/amyloplastic, transcript variant X2	TCONS_00032841	osa-miR159d	15	0.555556	3.27852e-10
XM_020817506.2	alpha-1,4 glucan phosphorylase L isozyme, chloroplastic/amyloplastic, transcript variant X2	TCONS_00032841	osa-miR159f	15	0.555556	3.27852e-10
XM_020817506.2	alpha-1,4 glucan phosphorylase L isozyme, chloroplastic/amyloplastic, transcript variant X2	TCONS_00032841	pta-miR159a	15	0.555556	3.27852e-10
XM_020817506.2	alpha-1,4 glucan phosphorylase L isozyme, chloroplastic/amyloplastic, transcript variant X2	TCONS_00032841	pta-miR159c	15	0.555556	3.27852e-10
XM_020817506.2	alpha-1,4 glucan phosphorylase L isozyme, chloroplastic/amyloplastic, transcript variant X2	TCONS_00032841	ptc-miR159d	15	0.555556	3.27852e-10
XM_020817506.2	alpha-1,4 glucan phosphorylase L isozyme, chloroplastic/amyloplastic, transcript variant X2	TCONS_00032842	aly-miR159c-3p	15	0.483871	3.27852e-10
XM_020817506.2	alpha-1,4 glucan phosphorylase L isozyme, chloroplastic/amyloplastic, transcript variant X2	TCONS_00032842	bdi-miR159a-3p	15	0.483871	3.27852e-10
XM_020817506.2	alpha-1,4 glucan phosphorylase L isozyme, chloroplastic/amyloplastic, transcript variant X2	TCONS_00032842	cme-miR159b	15	0.483871	3.27852e-10
XM_020817506.2	alpha-1,4 glucan phosphorylase L isozyme, chloroplastic/amyloplastic, transcript variant X2	TCONS_00032842	cpa-miR159b	15	0.483871	3.27852e-10
XM_020817506.2	alpha-1,4 glucan phosphorylase L isozyme, chloroplastic/amyloplastic, transcript variant X2	TCONS_00032842	fve-miR159c	15	0.483871	3.27852e-10
XM_020817506.2	alpha-1,4 glucan phosphorylase L isozyme, chloroplastic/amyloplastic, transcript variant X2	TCONS_00032842	osa-miR159d	15	0.483871	3.27852e-10
XM_020817506.2	alpha-1,4 glucan phosphorylase L isozyme, chloroplastic/amyloplastic, transcript variant X2	TCONS_00032842	osa-miR159f	15	0.483871	3.27852e-10
XM_020817506.2	alpha-1,4 glucan phosphorylase L isozyme, chloroplastic/amyloplastic, transcript variant X2	TCONS_00032842	pta-miR159a	15	0.483871	3.27852e-10
XM_020817506.2	alpha-1,4 glucan phosphorylase L isozyme, chloroplastic/amyloplastic, transcript variant X2	TCONS_00032842	pta-miR159c	15	0.483871	3.27852e-10
XM_020817506.2	alpha-1,4 glucan phosphorylase L isozyme, chloroplastic/amyloplastic, transcript variant X2	TCONS_00032842	ptc-miR159d	15	0.483871	3.27852e-10
XM_020818252.2	probable receptor-like protein kinase At1g80640	XR_003701426.1	aau-miR319	18	0.642857	9.96096e-17
XM_020818252.2	probable receptor-like protein kinase At1g80640	XR_003701426.1	aly-miR159c-3p	18	0.642857	9.96096e-17
XM_020818252.2	probable receptor-like protein kinase At1g80640	XR_003701426.1	aly-miR319c-3p	18	0.642857	9.96096e-17
XM_020818252.2	probable receptor-like protein kinase At1g80640	XR_003701426.1	atr-miR319a	18	0.642857	9.96096e-17
XM_020818252.2	probable receptor-like protein kinase At1g80640	XR_003701426.1	bdi-miR319b-3p	18	0.642857	9.96096e-17
XM_020818252.2	probable receptor-like protein kinase At1g80640	XR_003701426.1	cme-miR319c	18	0.642857	9.96096e-17
XM_020818252.2	probable receptor-like protein kinase At1g80640	XR_003701426.1	cpa-miR319	18	0.642857	9.96096e-17
XM_020818252.2	probable receptor-like protein kinase At1g80640	XR_003701426.1	csi-miR159c-3p	18	0.642857	9.96096e-17
XM_020818252.2	probable receptor-like protein kinase At1g80640	XR_003701426.1	gma-miR319g	18	0.642857	9.96096e-17
XM_020818252.2	probable receptor-like protein kinase At1g80640	XR_003701426.1	mes-miR319h	18	0.642857	9.96096e-17
XM_020818252.2	probable receptor-like protein kinase At1g80640	XR_003701426.1	mtr-miR319c-3p	18	0.642857	9.96096e-17
XM_020818252.2	probable receptor-like protein kinase At1g80640	XR_003701426.1	ppt-miR319a	18	0.642857	9.96096e-17
XM_020818252.2	probable receptor-like protein kinase At1g80640	XR_003701426.1	pta-miR319	18	0.642857	9.96096e-17
XM_020818252.2	probable receptor-like protein kinase At1g80640	XR_002305298.2	bdi-miR319b-3p	11	0.647059	2.37214e-07
XM_020818252.2	probable receptor-like protein kinase At1g80640	XR_002305298.2	cpa-miR159b	11	0.647059	2.37214e-07
XM_020818252.2	probable receptor-like protein kinase At1g80640	XR_002305298.2	csi-miR159c-3p	11	0.647059	2.37214e-07
XM_020818252.2	probable receptor-like protein kinase At1g80640	XR_002305298.2	mes-miR319h	11	0.647059	2.37214e-07
XM_020818252.2	probable receptor-like protein kinase At1g80640	XR_002305298.2	ppt-miR319a	11	0.647059	2.37214e-07
XM_020818252.2	probable receptor-like protein kinase At1g80640	XR_002305298.2	pta-miR159c	11	0.647059	2.37214e-07
XM_020818252.2	probable receptor-like protein kinase At1g80640	XR_002305298.2	ptc-miR159d	11	0.647059	2.37214e-07
XM_020818252.2	probable receptor-like protein kinase At1g80640	TCONS_00017086	cme-miR159b	10	0.588235	2.52692e-06
XM_020818252.2	probable receptor-like protein kinase At1g80640	TCONS_00017086	cpa-miR159b	10	0.588235	2.52692e-06
XM_020818252.2	probable receptor-like protein kinase At1g80640	TCONS_00017086	fve-miR159c	10	0.588235	2.52692e-06
XM_020818252.2	probable receptor-like protein kinase At1g80640	TCONS_00017086	osa-miR159c	10	0.588235	2.52692e-06
XM_020818252.2	probable receptor-like protein kinase At1g80640	TCONS_00017086	osa-miR159d	10	0.588235	2.52692e-06
XM_020818252.2	probable receptor-like protein kinase At1g80640	TCONS_00017086	pta-miR159c	10	0.588235	2.52692e-06
XM_020818252.2	probable receptor-like protein kinase At1g80640	TCONS_00017086	ptc-miR159d	10	0.588235	2.52692e-06
XM_020818252.2	probable receptor-like protein kinase At1g80640	TCONS_00032841	aly-miR159c-3p	10	0.37037	2.52692e-06
XM_020818252.2	probable receptor-like protein kinase At1g80640	TCONS_00032841	cme-miR159b	10	0.37037	2.52692e-06
XM_020818252.2	probable receptor-like protein kinase At1g80640	TCONS_00032841	cpa-miR159b	10	0.37037	2.52692e-06
XM_020818252.2	probable receptor-like protein kinase At1g80640	TCONS_00032841	fve-miR159c	10	0.37037	2.52692e-06
XM_020818252.2	probable receptor-like protein kinase At1g80640	TCONS_00032841	osa-miR159d	10	0.37037	2.52692e-06
XM_020818252.2	probable receptor-like protein kinase At1g80640	TCONS_00032841	pta-miR159a	10	0.37037	2.52692e-06
XM_020818252.2	probable receptor-like protein kinase At1g80640	TCONS_00032841	pta-miR159c	10	0.37037	2.52692e-06
XM_020818252.2	probable receptor-like protein kinase At1g80640	TCONS_00032841	ptc-miR159d	10	0.37037	2.52692e-06
XM_020818252.2	probable receptor-like protein kinase At1g80640	TCONS_00032842	aly-miR159c-3p	10	0.322581	2.52692e-06
XM_020818252.2	probable receptor-like protein kinase At1g80640	TCONS_00032842	cme-miR159b	10	0.322581	2.52692e-06
XM_020818252.2	probable receptor-like protein kinase At1g80640	TCONS_00032842	cpa-miR159b	10	0.322581	2.52692e-06
XM_020818252.2	probable receptor-like protein kinase At1g80640	TCONS_00032842	fve-miR159c	10	0.322581	2.52692e-06
XM_020818252.2	probable receptor-like protein kinase At1g80640	TCONS_00032842	osa-miR159d	10	0.322581	2.52692e-06
XM_020818252.2	probable receptor-like protein kinase At1g80640	TCONS_00032842	pta-miR159a	10	0.322581	2.52692e-06
XM_020818252.2	probable receptor-like protein kinase At1g80640	TCONS_00032842	pta-miR159c	10	0.322581	2.52692e-06
XM_020818252.2	probable receptor-like protein kinase At1g80640	TCONS_00032842	ptc-miR159d	10	0.322581	2.52692e-06
XM_020819183.2	senescence-associated protein OSA15, chloroplastic, transcript variant X2	XR_003701085.1	aau-miR396	12	0.923077	0
XM_020819183.2	senescence-associated protein OSA15, chloroplastic, transcript variant X2	XR_003701085.1	aof-miR396a	12	0.923077	0
XM_020819183.2	senescence-associated protein OSA15, chloroplastic, transcript variant X2	XR_003701085.1	gma-miR396e	12	0.923077	0
XM_020819183.2	senescence-associated protein OSA15, chloroplastic, transcript variant X2	XR_003701085.1	gma-miR396h	12	0.923077	0
XM_020819183.2	senescence-associated protein OSA15, chloroplastic, transcript variant X2	XR_003701085.1	mdm-miR396a	12	0.923077	0
XM_020819183.2	senescence-associated protein OSA15, chloroplastic, transcript variant X2	XR_003701085.1	NW_021318846.1_2647_star	12	0.923077	0
XM_020819183.2	senescence-associated protein OSA15, chloroplastic, transcript variant X2	XR_003701085.1	vca-miR396-5p	12	0.923077	0
XM_020819183.2	senescence-associated protein OSA15, chloroplastic, transcript variant X2	TCONS_00010760	aau-miR396	11	0.916667	1.1501e-23
XM_020819183.2	senescence-associated protein OSA15, chloroplastic, transcript variant X2	TCONS_00010760	gma-miR396e	11	0.916667	1.1501e-23
XM_020819183.2	senescence-associated protein OSA15, chloroplastic, transcript variant X2	TCONS_00010760	gma-miR396h	11	0.916667	1.1501e-23
XM_020819183.2	senescence-associated protein OSA15, chloroplastic, transcript variant X2	TCONS_00010760	mdm-miR396a	11	0.916667	1.1501e-23
XM_020819183.2	senescence-associated protein OSA15, chloroplastic, transcript variant X2	TCONS_00010760	NW_021318846.1_2647_star	11	0.916667	1.1501e-23
XM_020819183.2	senescence-associated protein OSA15, chloroplastic, transcript variant X2	TCONS_00010760	vca-miR396-5p	11	0.916667	1.1501e-23
XM_020819183.2	senescence-associated protein OSA15, chloroplastic, transcript variant X2	XR_003700291.1	aau-miR396	11	0.407407	1.1501e-23
XM_020819183.2	senescence-associated protein OSA15, chloroplastic, transcript variant X2	XR_003700291.1	aof-miR396a	11	0.407407	1.1501e-23
XM_020819183.2	senescence-associated protein OSA15, chloroplastic, transcript variant X2	XR_003700291.1	gma-miR396e	11	0.407407	1.1501e-23
XM_020819183.2	senescence-associated protein OSA15, chloroplastic, transcript variant X2	XR_003700291.1	gma-miR396h	11	0.407407	1.1501e-23
XM_020819183.2	senescence-associated protein OSA15, chloroplastic, transcript variant X2	XR_003700291.1	mdm-miR396a	11	0.407407	1.1501e-23
XM_020819183.2	senescence-associated protein OSA15, chloroplastic, transcript variant X2	XR_003700291.1	NW_021318846.1_2647_star	11	0.407407	1.1501e-23
XM_020819183.2	senescence-associated protein OSA15, chloroplastic, transcript variant X2	XR_003700291.1	vca-miR396-5p	11	0.407407	1.1501e-23
XM_020819183.2	senescence-associated protein OSA15, chloroplastic, transcript variant X2	XR_003701912.1	aau-miR396	11	0.647059	1.1501e-23
XM_020819183.2	senescence-associated protein OSA15, chloroplastic, transcript variant X2	XR_003701912.1	aof-miR396a	11	0.647059	1.1501e-23
XM_020819183.2	senescence-associated protein OSA15, chloroplastic, transcript variant X2	XR_003701912.1	gma-miR396e	11	0.647059	1.1501e-23
XM_020819183.2	senescence-associated protein OSA15, chloroplastic, transcript variant X2	XR_003701912.1	gma-miR396h	11	0.647059	1.1501e-23
XM_020819183.2	senescence-associated protein OSA15, chloroplastic, transcript variant X2	XR_003701912.1	mdm-miR396a	11	0.647059	1.1501e-23
XM_020819183.2	senescence-associated protein OSA15, chloroplastic, transcript variant X2	XR_003701912.1	NW_021318846.1_2647_star	11	0.647059	1.1501e-23
XM_020819183.2	senescence-associated protein OSA15, chloroplastic, transcript variant X2	XR_003701912.1	vca-miR396-5p	11	0.647059	1.1501e-23
XM_020819362.2	uncharacterized LOC110094190	TCONS_00026869	aly-miR167a-5p	13	0.866667	1.16158e-26
XM_020819362.2	uncharacterized LOC110094190	TCONS_00026869	bna-miR167a	13	0.866667	1.16158e-26
XM_020819362.2	uncharacterized LOC110094190	XR_003702199.1	aly-miR167a-5p	12	0.315789	6.88006e-23
XM_020819362.2	uncharacterized LOC110094190	XR_003702199.1	bna-miR167a	12	0.315789	6.88006e-23
XM_020819362.2	uncharacterized LOC110094190	XR_003702200.1	aly-miR167a-5p	12	0.333333	6.88006e-23
XM_020819362.2	uncharacterized LOC110094190	XR_003702200.1	bna-miR167a	12	0.333333	6.88006e-23
XM_020819362.2	uncharacterized LOC110094190	TCONS_00018697	aly-miR167a-5p	11	0.916667	9.44129e-20
XM_020819362.2	uncharacterized LOC110094190	TCONS_00018697	bna-miR167a	11	0.916667	9.44129e-20
XM_020819712.2	probable WRKY transcription factor 53	XR_003701426.1	aly-miR159c-3p	11	0.392857	2.6213e-14
XM_020819712.2	probable WRKY transcription factor 53	XR_003701426.1	cme-miR319c	11	0.392857	2.6213e-14
XM_020819712.2	probable WRKY transcription factor 53	XR_003701426.1	gma-miR319p	11	0.392857	2.6213e-14
XM_020819712.2	probable WRKY transcription factor 53	XR_003701426.1	pta-miR319	11	0.392857	2.6213e-14
XM_020819712.2	probable WRKY transcription factor 53	TCONS_00005590	aly-miR159c-3p	10	0.909091	2.02782e-12
XM_020819712.2	probable WRKY transcription factor 53	TCONS_00031314	aly-miR159c-3p	10	0.526316	2.02782e-12
XM_020819712.2	probable WRKY transcription factor 53	TCONS_00031314	gma-miR319p	10	0.526316	2.02782e-12
XM_020821072.2	uncharacterized LOC110095504, transcript variant X2	XR_003701379.1	aly-miR395d-3p	11	0.785714	3.66196e-15
XM_020821072.2	uncharacterized LOC110095504, transcript variant X2	XR_003701379.1	cme-miR395b	11	0.785714	3.66196e-15
XM_020821072.2	uncharacterized LOC110095504, transcript variant X2	XR_003701379.1	eun-miR395-3p	11	0.785714	3.66196e-15
XM_020821072.2	uncharacterized LOC110095504, transcript variant X2	XR_003701379.1	osa-miR395b	11	0.785714	3.66196e-15
XM_020821072.2	uncharacterized LOC110095504, transcript variant X2	XR_003701379.1	sly-miR395a	11	0.785714	3.66196e-15
XM_020821072.2	uncharacterized LOC110095504, transcript variant X2	XR_003701381.1	aly-miR395d-3p	11	0.785714	3.66196e-15
XM_020821072.2	uncharacterized LOC110095504, transcript variant X2	XR_003701381.1	cme-miR395b	11	0.785714	3.66196e-15
XM_020821072.2	uncharacterized LOC110095504, transcript variant X2	XR_003701381.1	eun-miR395-3p	11	0.785714	3.66196e-15
XM_020821072.2	uncharacterized LOC110095504, transcript variant X2	XR_003701381.1	osa-miR395b	11	0.785714	3.66196e-15
XM_020821072.2	uncharacterized LOC110095504, transcript variant X2	XR_003701381.1	sly-miR395a	11	0.785714	3.66196e-15
XM_020821462.2	uncharacterized LOC110095786, transcript variant X3	TCONS_00017086	cme-miR159b	13	0.764706	5.26498e-21
XM_020821462.2	uncharacterized LOC110095786, transcript variant X3	TCONS_00017086	cpa-miR159b	13	0.764706	5.26498e-21
XM_020821462.2	uncharacterized LOC110095786, transcript variant X3	TCONS_00017086	fve-miR159c	13	0.764706	5.26498e-21
XM_020821462.2	uncharacterized LOC110095786, transcript variant X3	TCONS_00017086	osa-miR159c	13	0.764706	5.26498e-21
XM_020821462.2	uncharacterized LOC110095786, transcript variant X3	TCONS_00017086	osa-miR159d	13	0.764706	5.26498e-21
XM_020821462.2	uncharacterized LOC110095786, transcript variant X3	TCONS_00017086	pta-miR159c	13	0.764706	5.26498e-21
XM_020821462.2	uncharacterized LOC110095786, transcript variant X3	TCONS_00017086	ptc-miR159d	13	0.764706	5.26498e-21
XM_020821462.2	uncharacterized LOC110095786, transcript variant X3	TCONS_00032841	aly-miR159c-3p	12	0.444444	1.92357e-18
XM_020821462.2	uncharacterized LOC110095786, transcript variant X3	TCONS_00032841	cme-miR159b	12	0.444444	1.92357e-18
XM_020821462.2	uncharacterized LOC110095786, transcript variant X3	TCONS_00032841	cpa-miR159b	12	0.444444	1.92357e-18
XM_020821462.2	uncharacterized LOC110095786, transcript variant X3	TCONS_00032841	fve-miR159c	12	0.444444	1.92357e-18
XM_020821462.2	uncharacterized LOC110095786, transcript variant X3	TCONS_00032841	osa-miR159d	12	0.444444	1.92357e-18
XM_020821462.2	uncharacterized LOC110095786, transcript variant X3	TCONS_00032841	osa-miR159f	12	0.444444	1.92357e-18
XM_020821462.2	uncharacterized LOC110095786, transcript variant X3	TCONS_00032841	pta-miR159c	12	0.444444	1.92357e-18
XM_020821462.2	uncharacterized LOC110095786, transcript variant X3	TCONS_00032841	ptc-miR159d	12	0.444444	1.92357e-18
XM_020821462.2	uncharacterized LOC110095786, transcript variant X3	TCONS_00032842	aly-miR159c-3p	12	0.387097	1.92357e-18
XM_020821462.2	uncharacterized LOC110095786, transcript variant X3	TCONS_00032842	cme-miR159b	12	0.387097	1.92357e-18
XM_020821462.2	uncharacterized LOC110095786, transcript variant X3	TCONS_00032842	cpa-miR159b	12	0.387097	1.92357e-18
XM_020821462.2	uncharacterized LOC110095786, transcript variant X3	TCONS_00032842	fve-miR159c	12	0.387097	1.92357e-18
XM_020821462.2	uncharacterized LOC110095786, transcript variant X3	TCONS_00032842	osa-miR159d	12	0.387097	1.92357e-18
XM_020821462.2	uncharacterized LOC110095786, transcript variant X3	TCONS_00032842	osa-miR159f	12	0.387097	1.92357e-18
XM_020821462.2	uncharacterized LOC110095786, transcript variant X3	TCONS_00032842	pta-miR159c	12	0.387097	1.92357e-18
XM_020821462.2	uncharacterized LOC110095786, transcript variant X3	TCONS_00032842	ptc-miR159d	12	0.387097	1.92357e-18
XM_020821886.2	receptor-like protein 7	TCONS_00024832	aly-miR395d-3p	11	0.916667	4.16891e-16
XM_020821886.2	receptor-like protein 7	TCONS_00024832	ata-miR395e-3p	11	0.916667	4.16891e-16
XM_020821886.2	receptor-like protein 7	TCONS_00024832	cme-miR395b	11	0.916667	4.16891e-16
XM_020821886.2	receptor-like protein 7	TCONS_00024832	eun-miR395-3p	11	0.916667	4.16891e-16
XM_020821886.2	receptor-like protein 7	TCONS_00024832	sly-miR395a	11	0.916667	4.16891e-16
XM_020821886.2	receptor-like protein 7	TCONS_00025990	aly-miR395d-3p	11	0.916667	4.16891e-16
XM_020821886.2	receptor-like protein 7	TCONS_00025990	aof-miR395a	11	0.916667	4.16891e-16
XM_020821886.2	receptor-like protein 7	TCONS_00025990	ata-miR395e-3p	11	0.916667	4.16891e-16
XM_020821886.2	receptor-like protein 7	TCONS_00025990	cme-miR395b	11	0.916667	4.16891e-16
XM_020821886.2	receptor-like protein 7	TCONS_00025990	eun-miR395-3p	11	0.916667	4.16891e-16
XM_020821886.2	receptor-like protein 7	TCONS_00025990	osa-miR395b	11	0.916667	4.16891e-16
XM_020821886.2	receptor-like protein 7	TCONS_00025990	sly-miR395a	11	0.916667	4.16891e-16
XM_020822359.2	heparan-alpha-glucosaminide N-acetyltransferase, transcript variant X1	TCONS_00026869	aly-miR167a-5p	13	0.866667	4.21791e-10
XM_020822359.2	heparan-alpha-glucosaminide N-acetyltransferase, transcript variant X1	TCONS_00026869	bna-miR167a	13	0.866667	4.21791e-10
XM_020822359.2	heparan-alpha-glucosaminide N-acetyltransferase, transcript variant X1	XR_003702199.1	aly-miR167a-5p	13	0.342105	4.21791e-10
XM_020822359.2	heparan-alpha-glucosaminide N-acetyltransferase, transcript variant X1	XR_003702199.1	bna-miR167a	13	0.342105	4.21791e-10
XM_020822359.2	heparan-alpha-glucosaminide N-acetyltransferase, transcript variant X1	XR_003702200.1	aly-miR167a-5p	13	0.361111	4.21791e-10
XM_020822359.2	heparan-alpha-glucosaminide N-acetyltransferase, transcript variant X1	XR_003702200.1	bna-miR167a	13	0.361111	4.21791e-10
XM_020822359.2	heparan-alpha-glucosaminide N-acetyltransferase, transcript variant X1	TCONS_00018697	aly-miR167a-5p	12	1	7.16432e-09
XM_020822359.2	heparan-alpha-glucosaminide N-acetyltransferase, transcript variant X1	TCONS_00018697	bna-miR167a	12	1	7.16432e-09
XM_020822359.2	heparan-alpha-glucosaminide N-acetyltransferase, transcript variant X1	TCONS_00031314	aly-miR159c-3p	11	0.578947	1.01373e-07
XM_020822359.2	heparan-alpha-glucosaminide N-acetyltransferase, transcript variant X1	TCONS_00031314	gma-miR319p	11	0.578947	1.01373e-07
XM_020822446.2	ATP sulfurylase 1, chloroplastic-like	TCONS_00025990	aly-miR395d-3p	12	1	1.92357e-18
XM_020822446.2	ATP sulfurylase 1, chloroplastic-like	TCONS_00025990	aof-miR395a	12	1	1.92357e-18
XM_020822446.2	ATP sulfurylase 1, chloroplastic-like	TCONS_00025990	ata-miR395e-3p	12	1	1.92357e-18
XM_020822446.2	ATP sulfurylase 1, chloroplastic-like	TCONS_00025990	cme-miR395b	12	1	1.92357e-18
XM_020822446.2	ATP sulfurylase 1, chloroplastic-like	TCONS_00025990	eun-miR395-3p	12	1	1.92357e-18
XM_020822446.2	ATP sulfurylase 1, chloroplastic-like	TCONS_00025990	osa-miR395b	12	1	1.92357e-18
XM_020822446.2	ATP sulfurylase 1, chloroplastic-like	TCONS_00025990	sly-miR395a	12	1	1.92357e-18
XM_020822446.2	ATP sulfurylase 1, chloroplastic-like	TCONS_00024832	aly-miR395d-3p	11	0.916667	4.16891e-16
XM_020822446.2	ATP sulfurylase 1, chloroplastic-like	TCONS_00024832	ata-miR395e-3p	11	0.916667	4.16891e-16
XM_020822446.2	ATP sulfurylase 1, chloroplastic-like	TCONS_00024832	cme-miR395b	11	0.916667	4.16891e-16
XM_020822446.2	ATP sulfurylase 1, chloroplastic-like	TCONS_00024832	eun-miR395-3p	11	0.916667	4.16891e-16
XM_020822446.2	ATP sulfurylase 1, chloroplastic-like	TCONS_00024832	sly-miR395a	11	0.916667	4.16891e-16
XM_020822446.2	ATP sulfurylase 1, chloroplastic-like	XR_003701379.1	aly-miR395d-3p	11	0.785714	4.16891e-16
XM_020822446.2	ATP sulfurylase 1, chloroplastic-like	XR_003701379.1	cme-miR395b	11	0.785714	4.16891e-16
XM_020822446.2	ATP sulfurylase 1, chloroplastic-like	XR_003701379.1	eun-miR395-3p	11	0.785714	4.16891e-16
XM_020822446.2	ATP sulfurylase 1, chloroplastic-like	XR_003701379.1	osa-miR395b	11	0.785714	4.16891e-16
XM_020822446.2	ATP sulfurylase 1, chloroplastic-like	XR_003701379.1	sly-miR395a	11	0.785714	4.16891e-16
XM_020822446.2	ATP sulfurylase 1, chloroplastic-like	XR_003701381.1	aly-miR395d-3p	11	0.785714	4.16891e-16
XM_020822446.2	ATP sulfurylase 1, chloroplastic-like	XR_003701381.1	cme-miR395b	11	0.785714	4.16891e-16
XM_020822446.2	ATP sulfurylase 1, chloroplastic-like	XR_003701381.1	eun-miR395-3p	11	0.785714	4.16891e-16
XM_020822446.2	ATP sulfurylase 1, chloroplastic-like	XR_003701381.1	osa-miR395b	11	0.785714	4.16891e-16
XM_020822446.2	ATP sulfurylase 1, chloroplastic-like	XR_003701381.1	sly-miR395a	11	0.785714	4.16891e-16
XM_020822644.2	probable potassium transporter 17, transcript variant X1	XR_003701426.1	aau-miR319	17	0.607143	1.10145e-10
XM_020822644.2	probable potassium transporter 17, transcript variant X1	XR_003701426.1	aly-miR159c-3p	17	0.607143	1.10145e-10
XM_020822644.2	probable potassium transporter 17, transcript variant X1	XR_003701426.1	aly-miR319c-3p	17	0.607143	1.10145e-10
XM_020822644.2	probable potassium transporter 17, transcript variant X1	XR_003701426.1	atr-miR319a	17	0.607143	1.10145e-10
XM_020822644.2	probable potassium transporter 17, transcript variant X1	XR_003701426.1	cme-miR319c	17	0.607143	1.10145e-10
XM_020822644.2	probable potassium transporter 17, transcript variant X1	XR_003701426.1	csi-miR159c-3p	17	0.607143	1.10145e-10
XM_020822644.2	probable potassium transporter 17, transcript variant X1	XR_003701426.1	gma-miR319p	17	0.607143	1.10145e-10
XM_020822644.2	probable potassium transporter 17, transcript variant X1	XR_003701426.1	mes-miR319h	17	0.607143	1.10145e-10
XM_020822644.2	probable potassium transporter 17, transcript variant X1	XR_003701426.1	mtr-miR319c-3p	17	0.607143	1.10145e-10
XM_020822644.2	probable potassium transporter 17, transcript variant X1	XR_003701426.1	ppt-miR319a	17	0.607143	1.10145e-10
XM_020822644.2	probable potassium transporter 17, transcript variant X1	XR_003701426.1	pta-miR319	17	0.607143	1.10145e-10
XM_020822644.2	probable potassium transporter 17, transcript variant X1	TCONS_00032841	aly-miR159c-3p	15	0.555556	1.5894e-08
XM_020822644.2	probable potassium transporter 17, transcript variant X1	TCONS_00032841	bdi-miR159a-3p	15	0.555556	1.5894e-08
XM_020822644.2	probable potassium transporter 17, transcript variant X1	TCONS_00032841	cme-miR159b	15	0.555556	1.5894e-08
XM_020822644.2	probable potassium transporter 17, transcript variant X1	TCONS_00032841	cpa-miR159b	15	0.555556	1.5894e-08
XM_020822644.2	probable potassium transporter 17, transcript variant X1	TCONS_00032841	fve-miR159c	15	0.555556	1.5894e-08
XM_020822644.2	probable potassium transporter 17, transcript variant X1	TCONS_00032841	osa-miR159d	15	0.555556	1.5894e-08
XM_020822644.2	probable potassium transporter 17, transcript variant X1	TCONS_00032841	osa-miR159f	15	0.555556	1.5894e-08
XM_020822644.2	probable potassium transporter 17, transcript variant X1	TCONS_00032841	pta-miR159a	15	0.555556	1.5894e-08
XM_020822644.2	probable potassium transporter 17, transcript variant X1	TCONS_00032841	pta-miR159c	15	0.555556	1.5894e-08
XM_020822644.2	probable potassium transporter 17, transcript variant X1	TCONS_00032841	ptc-miR159d	15	0.555556	1.5894e-08
XM_020822644.2	probable potassium transporter 17, transcript variant X1	TCONS_00032842	aly-miR159c-3p	15	0.483871	1.5894e-08
XM_020822644.2	probable potassium transporter 17, transcript variant X1	TCONS_00032842	bdi-miR159a-3p	15	0.483871	1.5894e-08
XM_020822644.2	probable potassium transporter 17, transcript variant X1	TCONS_00032842	cme-miR159b	15	0.483871	1.5894e-08
XM_020822644.2	probable potassium transporter 17, transcript variant X1	TCONS_00032842	cpa-miR159b	15	0.483871	1.5894e-08
XM_020822644.2	probable potassium transporter 17, transcript variant X1	TCONS_00032842	fve-miR159c	15	0.483871	1.5894e-08
XM_020822644.2	probable potassium transporter 17, transcript variant X1	TCONS_00032842	osa-miR159d	15	0.483871	1.5894e-08
XM_020822644.2	probable potassium transporter 17, transcript variant X1	TCONS_00032842	osa-miR159f	15	0.483871	1.5894e-08
XM_020822644.2	probable potassium transporter 17, transcript variant X1	TCONS_00032842	pta-miR159a	15	0.483871	1.5894e-08
XM_020822644.2	probable potassium transporter 17, transcript variant X1	TCONS_00032842	pta-miR159c	15	0.483871	1.5894e-08
XM_020822644.2	probable potassium transporter 17, transcript variant X1	TCONS_00032842	ptc-miR159d	15	0.483871	1.5894e-08
XM_020822644.2	probable potassium transporter 17, transcript variant X1	XR_002305298.2	bdi-miR159a-3p	12	0.705882	9.42238e-06
XM_020822644.2	probable potassium transporter 17, transcript variant X1	XR_002305298.2	cpa-miR159b	12	0.705882	9.42238e-06
XM_020822644.2	probable potassium transporter 17, transcript variant X1	XR_002305298.2	csi-miR159c-3p	12	0.705882	9.42238e-06
XM_020822644.2	probable potassium transporter 17, transcript variant X1	XR_002305298.2	gma-miR319p	12	0.705882	9.42238e-06
XM_020822644.2	probable potassium transporter 17, transcript variant X1	XR_002305298.2	mes-miR319h	12	0.705882	9.42238e-06
XM_020822644.2	probable potassium transporter 17, transcript variant X1	XR_002305298.2	NW_021320138.1_11162	12	0.705882	9.42238e-06
XM_020822644.2	probable potassium transporter 17, transcript variant X1	XR_002305298.2	osa-miR159f	12	0.705882	9.42238e-06
XM_020822644.2	probable potassium transporter 17, transcript variant X1	XR_002305298.2	ppt-miR319a	12	0.705882	9.42238e-06
XM_020822644.2	probable potassium transporter 17, transcript variant X1	XR_002305298.2	pta-miR159c	12	0.705882	9.42238e-06
XM_020822644.2	probable potassium transporter 17, transcript variant X1	XR_002305298.2	ptc-miR159d	12	0.705882	9.42238e-06
XM_020823128.2	clathrin interactor EPSIN 3, transcript variant X1	XR_003701652.1	aly-miR156a-5p	10	0.526316	5.30529e-17
XM_020823128.2	clathrin interactor EPSIN 3, transcript variant X1	XR_003701652.1	bna-miR156a	10	0.526316	5.30529e-17
XM_020823128.2	clathrin interactor EPSIN 3, transcript variant X1	XR_003701652.1	cca-miR156b	10	0.526316	5.30529e-17
XM_020823128.2	clathrin interactor EPSIN 3, transcript variant X1	XR_003701652.1	gma-miR156q	10	0.526316	5.30529e-17
XM_020823129.2	clathrin interactor EPSIN 3, transcript variant X2	XR_003701652.1	aly-miR156a-5p	10	0.526316	5.30529e-17
XM_020823129.2	clathrin interactor EPSIN 3, transcript variant X2	XR_003701652.1	bna-miR156a	10	0.526316	5.30529e-17
XM_020823129.2	clathrin interactor EPSIN 3, transcript variant X2	XR_003701652.1	cca-miR156b	10	0.526316	5.30529e-17
XM_020823129.2	clathrin interactor EPSIN 3, transcript variant X2	XR_003701652.1	gma-miR156q	10	0.526316	5.30529e-17
XM_020823129.2	clathrin interactor EPSIN 3, transcript variant X2	XR_003701652.1	mtr-miR156j	10	0.526316	5.30529e-17
XM_020823129.2	clathrin interactor EPSIN 3, transcript variant X2	XR_003701652.1	pab-miR156b	10	0.526316	5.30529e-17
XM_020823235.2	GABA transporter 1	XR_003701426.1	aau-miR319	12	0.428571	1.08158e-19
XM_020823235.2	GABA transporter 1	XR_003701426.1	aly-miR159c-3p	12	0.428571	1.08158e-19
XM_020823235.2	GABA transporter 1	XR_003701426.1	aly-miR319c-3p	12	0.428571	1.08158e-19
XM_020823235.2	GABA transporter 1	XR_003701426.1	atr-miR319a	12	0.428571	1.08158e-19
XM_020823235.2	GABA transporter 1	XR_003701426.1	cme-miR319c	12	0.428571	1.08158e-19
XM_020823235.2	GABA transporter 1	XR_003701426.1	gma-miR319g	12	0.428571	1.08158e-19
XM_020823235.2	GABA transporter 1	XR_003701426.1	mtr-miR319c-3p	12	0.428571	1.08158e-19
XM_020823235.2	GABA transporter 1	XR_003701426.1	pta-miR319	12	0.428571	1.08158e-19
XM_020823414.2	cytochrome P450 84A1	TCONS_00032841	aly-miR159c-3p	15	0.555556	1.43704e-23
XM_020823414.2	cytochrome P450 84A1	TCONS_00032841	bdi-miR159a-3p	15	0.555556	1.43704e-23
XM_020823414.2	cytochrome P450 84A1	TCONS_00032841	cme-miR159b	15	0.555556	1.43704e-23
XM_020823414.2	cytochrome P450 84A1	TCONS_00032841	cpa-miR159b	15	0.555556	1.43704e-23
XM_020823414.2	cytochrome P450 84A1	TCONS_00032841	fve-miR159c	15	0.555556	1.43704e-23
XM_020823414.2	cytochrome P450 84A1	TCONS_00032841	osa-miR159d	15	0.555556	1.43704e-23
XM_020823414.2	cytochrome P450 84A1	TCONS_00032841	osa-miR159f	15	0.555556	1.43704e-23
XM_020823414.2	cytochrome P450 84A1	TCONS_00032841	pta-miR159a	15	0.555556	1.43704e-23
XM_020823414.2	cytochrome P450 84A1	TCONS_00032841	pta-miR159c	15	0.555556	1.43704e-23
XM_020823414.2	cytochrome P450 84A1	TCONS_00032841	ptc-miR159d	15	0.555556	1.43704e-23
XM_020823414.2	cytochrome P450 84A1	TCONS_00032842	aly-miR159c-3p	15	0.483871	1.43704e-23
XM_020823414.2	cytochrome P450 84A1	TCONS_00032842	bdi-miR159a-3p	15	0.483871	1.43704e-23
XM_020823414.2	cytochrome P450 84A1	TCONS_00032842	cme-miR159b	15	0.483871	1.43704e-23
XM_020823414.2	cytochrome P450 84A1	TCONS_00032842	cpa-miR159b	15	0.483871	1.43704e-23
XM_020823414.2	cytochrome P450 84A1	TCONS_00032842	fve-miR159c	15	0.483871	1.43704e-23
XM_020823414.2	cytochrome P450 84A1	TCONS_00032842	osa-miR159d	15	0.483871	1.43704e-23
XM_020823414.2	cytochrome P450 84A1	TCONS_00032842	osa-miR159f	15	0.483871	1.43704e-23
XM_020823414.2	cytochrome P450 84A1	TCONS_00032842	pta-miR159a	15	0.483871	1.43704e-23
XM_020823414.2	cytochrome P450 84A1	TCONS_00032842	pta-miR159c	15	0.483871	1.43704e-23
XM_020823414.2	cytochrome P450 84A1	TCONS_00032842	ptc-miR159d	15	0.483871	1.43704e-23
XM_020823579.2	ATP sulfurylase 1, chloroplastic	TCONS_00025990	aly-miR395d-3p	12	1	1.08158e-19
XM_020823579.2	ATP sulfurylase 1, chloroplastic	TCONS_00025990	aof-miR395a	12	1	1.08158e-19
XM_020823579.2	ATP sulfurylase 1, chloroplastic	TCONS_00025990	ata-miR395e-3p	12	1	1.08158e-19
XM_020823579.2	ATP sulfurylase 1, chloroplastic	TCONS_00025990	cme-miR395b	12	1	1.08158e-19
XM_020823579.2	ATP sulfurylase 1, chloroplastic	TCONS_00025990	eun-miR395-3p	12	1	1.08158e-19
XM_020823579.2	ATP sulfurylase 1, chloroplastic	TCONS_00025990	osa-miR395b	12	1	1.08158e-19
XM_020823579.2	ATP sulfurylase 1, chloroplastic	TCONS_00025990	sly-miR395a	12	1	1.08158e-19
XM_020823579.2	ATP sulfurylase 1, chloroplastic	TCONS_00024832	aly-miR395d-3p	11	0.916667	3.67849e-17
XM_020823579.2	ATP sulfurylase 1, chloroplastic	TCONS_00024832	ata-miR395e-3p	11	0.916667	3.67849e-17
XM_020823579.2	ATP sulfurylase 1, chloroplastic	TCONS_00024832	cme-miR395b	11	0.916667	3.67849e-17
XM_020823579.2	ATP sulfurylase 1, chloroplastic	TCONS_00024832	eun-miR395-3p	11	0.916667	3.67849e-17
XM_020823579.2	ATP sulfurylase 1, chloroplastic	TCONS_00024832	sly-miR395a	11	0.916667	3.67849e-17
XM_020823579.2	ATP sulfurylase 1, chloroplastic	XR_003701379.1	aly-miR395d-3p	11	0.785714	3.67849e-17
XM_020823579.2	ATP sulfurylase 1, chloroplastic	XR_003701379.1	cme-miR395b	11	0.785714	3.67849e-17
XM_020823579.2	ATP sulfurylase 1, chloroplastic	XR_003701379.1	eun-miR395-3p	11	0.785714	3.67849e-17
XM_020823579.2	ATP sulfurylase 1, chloroplastic	XR_003701379.1	osa-miR395b	11	0.785714	3.67849e-17
XM_020823579.2	ATP sulfurylase 1, chloroplastic	XR_003701379.1	sly-miR395a	11	0.785714	3.67849e-17
XM_020823579.2	ATP sulfurylase 1, chloroplastic	XR_003701381.1	aly-miR395d-3p	11	0.785714	3.67849e-17
XM_020823579.2	ATP sulfurylase 1, chloroplastic	XR_003701381.1	cme-miR395b	11	0.785714	3.67849e-17
XM_020823579.2	ATP sulfurylase 1, chloroplastic	XR_003701381.1	eun-miR395-3p	11	0.785714	3.67849e-17
XM_020823579.2	ATP sulfurylase 1, chloroplastic	XR_003701381.1	osa-miR395b	11	0.785714	3.67849e-17
XM_020823579.2	ATP sulfurylase 1, chloroplastic	XR_003701381.1	sly-miR395a	11	0.785714	3.67849e-17
XM_020824535.2	disease resistance protein RGA2-like	TCONS_00032841	aly-miR159c-3p	15	0.555556	1.47182e-21
XM_020824535.2	disease resistance protein RGA2-like	TCONS_00032841	bdi-miR159a-3p	15	0.555556	1.47182e-21
XM_020824535.2	disease resistance protein RGA2-like	TCONS_00032841	cme-miR159b	15	0.555556	1.47182e-21
XM_020824535.2	disease resistance protein RGA2-like	TCONS_00032841	cpa-miR159b	15	0.555556	1.47182e-21
XM_020824535.2	disease resistance protein RGA2-like	TCONS_00032841	fve-miR159c	15	0.555556	1.47182e-21
XM_020824535.2	disease resistance protein RGA2-like	TCONS_00032841	osa-miR159d	15	0.555556	1.47182e-21
XM_020824535.2	disease resistance protein RGA2-like	TCONS_00032841	osa-miR159f	15	0.555556	1.47182e-21
XM_020824535.2	disease resistance protein RGA2-like	TCONS_00032841	pta-miR159a	15	0.555556	1.47182e-21
XM_020824535.2	disease resistance protein RGA2-like	TCONS_00032841	pta-miR159c	15	0.555556	1.47182e-21
XM_020824535.2	disease resistance protein RGA2-like	TCONS_00032841	ptc-miR159d	15	0.555556	1.47182e-21
XM_020824535.2	disease resistance protein RGA2-like	TCONS_00032842	aly-miR159c-3p	15	0.483871	1.47182e-21
XM_020824535.2	disease resistance protein RGA2-like	TCONS_00032842	bdi-miR159a-3p	15	0.483871	1.47182e-21
XM_020824535.2	disease resistance protein RGA2-like	TCONS_00032842	cme-miR159b	15	0.483871	1.47182e-21
XM_020824535.2	disease resistance protein RGA2-like	TCONS_00032842	cpa-miR159b	15	0.483871	1.47182e-21
XM_020824535.2	disease resistance protein RGA2-like	TCONS_00032842	fve-miR159c	15	0.483871	1.47182e-21
XM_020824535.2	disease resistance protein RGA2-like	TCONS_00032842	osa-miR159d	15	0.483871	1.47182e-21
XM_020824535.2	disease resistance protein RGA2-like	TCONS_00032842	osa-miR159f	15	0.483871	1.47182e-21
XM_020824535.2	disease resistance protein RGA2-like	TCONS_00032842	pta-miR159a	15	0.483871	1.47182e-21
XM_020824535.2	disease resistance protein RGA2-like	TCONS_00032842	pta-miR159c	15	0.483871	1.47182e-21
XM_020824535.2	disease resistance protein RGA2-like	TCONS_00032842	ptc-miR159d	15	0.483871	1.47182e-21
XM_020824962.2	protein RETICULATA-RELATED 3, chloroplastic	XR_002303219.2	aly-miR156a-5p	10	0.263158	9.64503e-12
XM_020824962.2	protein RETICULATA-RELATED 3, chloroplastic	XR_002303219.2	aly-miR156g-5p	10	0.263158	9.64503e-12
XM_020824962.2	protein RETICULATA-RELATED 3, chloroplastic	XR_002303219.2	bna-miR156a	10	0.263158	9.64503e-12
XM_020824962.2	protein RETICULATA-RELATED 3, chloroplastic	XR_002303219.2	cca-miR156b	10	0.263158	9.64503e-12
XM_020824962.2	protein RETICULATA-RELATED 3, chloroplastic	XR_002303219.2	gma-miR156q	10	0.263158	9.64503e-12
XM_020825573.2	protein DGS1, mitochondrial, transcript variant X1	XR_003701426.1	aau-miR319	13	0.464286	1.61028e-17
XM_020825573.2	protein DGS1, mitochondrial, transcript variant X1	XR_003701426.1	aly-miR319c-3p	13	0.464286	1.61028e-17
XM_020825573.2	protein DGS1, mitochondrial, transcript variant X1	XR_003701426.1	atr-miR319a	13	0.464286	1.61028e-17
XM_020825573.2	protein DGS1, mitochondrial, transcript variant X1	XR_003701426.1	cme-miR319c	13	0.464286	1.61028e-17
XM_020825573.2	protein DGS1, mitochondrial, transcript variant X1	XR_003701426.1	csi-miR159c-3p	13	0.464286	1.61028e-17
XM_020825573.2	protein DGS1, mitochondrial, transcript variant X1	XR_003701426.1	gma-miR319g	13	0.464286	1.61028e-17
XM_020825573.2	protein DGS1, mitochondrial, transcript variant X1	XR_003701426.1	gma-miR319p	13	0.464286	1.61028e-17
XM_020825573.2	protein DGS1, mitochondrial, transcript variant X1	XR_003701426.1	mes-miR319h	13	0.464286	1.61028e-17
XM_020825573.2	protein DGS1, mitochondrial, transcript variant X1	XR_003701426.1	mtr-miR319c-3p	13	0.464286	1.61028e-17
XM_020825573.2	protein DGS1, mitochondrial, transcript variant X1	XR_003701426.1	ppt-miR319a	13	0.464286	1.61028e-17
XM_020825573.2	protein DGS1, mitochondrial, transcript variant X1	XR_003701426.1	pta-miR319	13	0.464286	1.61028e-17
XM_020825573.2	protein DGS1, mitochondrial, transcript variant X1	XR_002305298.2	cpa-miR159b	10	0.588235	9.64503e-12
XM_020825573.2	protein DGS1, mitochondrial, transcript variant X1	XR_002305298.2	csi-miR159c-3p	10	0.588235	9.64503e-12
XM_020825573.2	protein DGS1, mitochondrial, transcript variant X1	XR_002305298.2	gma-miR319p	10	0.588235	9.64503e-12
XM_020825573.2	protein DGS1, mitochondrial, transcript variant X1	XR_002305298.2	mes-miR319h	10	0.588235	9.64503e-12
XM_020825573.2	protein DGS1, mitochondrial, transcript variant X1	XR_002305298.2	NW_021320138.1_11162	10	0.588235	9.64503e-12
XM_020825573.2	protein DGS1, mitochondrial, transcript variant X1	XR_002305298.2	ppt-miR319a	10	0.588235	9.64503e-12
XM_020825573.2	protein DGS1, mitochondrial, transcript variant X1	XR_002305298.2	pta-miR159c	10	0.588235	9.64503e-12
XM_020825573.2	protein DGS1, mitochondrial, transcript variant X1	XR_002305298.2	ptc-miR159d	10	0.588235	9.64503e-12
XM_020825817.2	heavy metal-associated isoprenylated plant protein 23, transcript variant X1	TCONS_00025990	aly-miR395d-3p	11	0.916667	9.44129e-20
XM_020825817.2	heavy metal-associated isoprenylated plant protein 23, transcript variant X1	TCONS_00025990	aof-miR395a	11	0.916667	9.44129e-20
XM_020825817.2	heavy metal-associated isoprenylated plant protein 23, transcript variant X1	TCONS_00025990	ata-miR395e-3p	11	0.916667	9.44129e-20
XM_020825817.2	heavy metal-associated isoprenylated plant protein 23, transcript variant X1	TCONS_00025990	cme-miR395b	11	0.916667	9.44129e-20
XM_020825817.2	heavy metal-associated isoprenylated plant protein 23, transcript variant X1	TCONS_00025990	eun-miR395-3p	11	0.916667	9.44129e-20
XM_020825817.2	heavy metal-associated isoprenylated plant protein 23, transcript variant X1	TCONS_00025990	osa-miR395b	11	0.916667	9.44129e-20
XM_020825817.2	heavy metal-associated isoprenylated plant protein 23, transcript variant X1	TCONS_00025990	sly-miR395a	11	0.916667	9.44129e-20
XM_020825817.2	heavy metal-associated isoprenylated plant protein 23, transcript variant X1	XR_003701379.1	aly-miR395d-3p	11	0.785714	9.44129e-20
XM_020825817.2	heavy metal-associated isoprenylated plant protein 23, transcript variant X1	XR_003701379.1	cme-miR395b	11	0.785714	9.44129e-20
XM_020825817.2	heavy metal-associated isoprenylated plant protein 23, transcript variant X1	XR_003701379.1	eun-miR395-3p	11	0.785714	9.44129e-20
XM_020825817.2	heavy metal-associated isoprenylated plant protein 23, transcript variant X1	XR_003701379.1	osa-miR395b	11	0.785714	9.44129e-20
XM_020825817.2	heavy metal-associated isoprenylated plant protein 23, transcript variant X1	XR_003701379.1	sly-miR395a	11	0.785714	9.44129e-20
XM_020825817.2	heavy metal-associated isoprenylated plant protein 23, transcript variant X1	XR_003701381.1	aly-miR395d-3p	11	0.785714	9.44129e-20
XM_020825817.2	heavy metal-associated isoprenylated plant protein 23, transcript variant X1	XR_003701381.1	cme-miR395b	11	0.785714	9.44129e-20
XM_020825817.2	heavy metal-associated isoprenylated plant protein 23, transcript variant X1	XR_003701381.1	eun-miR395-3p	11	0.785714	9.44129e-20
XM_020825817.2	heavy metal-associated isoprenylated plant protein 23, transcript variant X1	XR_003701381.1	osa-miR395b	11	0.785714	9.44129e-20
XM_020825817.2	heavy metal-associated isoprenylated plant protein 23, transcript variant X1	XR_003701381.1	sly-miR395a	11	0.785714	9.44129e-20
XM_020825817.2	heavy metal-associated isoprenylated plant protein 23, transcript variant X1	TCONS_00024832	aly-miR395d-3p	10	0.833333	5.30529e-17
XM_020825817.2	heavy metal-associated isoprenylated plant protein 23, transcript variant X1	TCONS_00024832	ata-miR395e-3p	10	0.833333	5.30529e-17
XM_020825817.2	heavy metal-associated isoprenylated plant protein 23, transcript variant X1	TCONS_00024832	cme-miR395b	10	0.833333	5.30529e-17
XM_020825817.2	heavy metal-associated isoprenylated plant protein 23, transcript variant X1	TCONS_00024832	eun-miR395-3p	10	0.833333	5.30529e-17
XM_020825817.2	heavy metal-associated isoprenylated plant protein 23, transcript variant X1	TCONS_00024832	sly-miR395a	10	0.833333	5.30529e-17
XM_020826146.2	mechanosensitive ion channel protein 6	TCONS_00017098	aly-miR172a-3p	10	0.714286	3.71572e-13
XM_020826146.2	mechanosensitive ion channel protein 6	TCONS_00017098	aqc-miR172b	10	0.714286	3.71572e-13
XM_020826146.2	mechanosensitive ion channel protein 6	TCONS_00017098	ata-miR172a-3p	10	0.714286	3.71572e-13
XM_020826346.2	receptor-like protein 7	TCONS_00025990	aly-miR395d-3p	12	1	1.92357e-18
XM_020826346.2	receptor-like protein 7	TCONS_00025990	aof-miR395a	12	1	1.92357e-18
XM_020826346.2	receptor-like protein 7	TCONS_00025990	ata-miR395e-3p	12	1	1.92357e-18
XM_020826346.2	receptor-like protein 7	TCONS_00025990	cme-miR395b	12	1	1.92357e-18
XM_020826346.2	receptor-like protein 7	TCONS_00025990	eun-miR395-3p	12	1	1.92357e-18
XM_020826346.2	receptor-like protein 7	TCONS_00025990	osa-miR395b	12	1	1.92357e-18
XM_020826346.2	receptor-like protein 7	TCONS_00025990	sly-miR395a	12	1	1.92357e-18
XM_020826346.2	receptor-like protein 7	TCONS_00024832	aly-miR395d-3p	11	0.916667	4.16891e-16
XM_020826346.2	receptor-like protein 7	TCONS_00024832	ata-miR395e-3p	11	0.916667	4.16891e-16
XM_020826346.2	receptor-like protein 7	TCONS_00024832	cme-miR395b	11	0.916667	4.16891e-16
XM_020826346.2	receptor-like protein 7	TCONS_00024832	eun-miR395-3p	11	0.916667	4.16891e-16
XM_020826346.2	receptor-like protein 7	TCONS_00024832	sly-miR395a	11	0.916667	4.16891e-16
XM_020826346.2	receptor-like protein 7	XR_003701379.1	aly-miR395d-3p	11	0.785714	4.16891e-16
XM_020826346.2	receptor-like protein 7	XR_003701379.1	cme-miR395b	11	0.785714	4.16891e-16
XM_020826346.2	receptor-like protein 7	XR_003701379.1	eun-miR395-3p	11	0.785714	4.16891e-16
XM_020826346.2	receptor-like protein 7	XR_003701379.1	osa-miR395b	11	0.785714	4.16891e-16
XM_020826346.2	receptor-like protein 7	XR_003701379.1	sly-miR395a	11	0.785714	4.16891e-16
XM_020826346.2	receptor-like protein 7	XR_003701381.1	aly-miR395d-3p	11	0.785714	4.16891e-16
XM_020826346.2	receptor-like protein 7	XR_003701381.1	cme-miR395b	11	0.785714	4.16891e-16
XM_020826346.2	receptor-like protein 7	XR_003701381.1	eun-miR395-3p	11	0.785714	4.16891e-16
XM_020826346.2	receptor-like protein 7	XR_003701381.1	osa-miR395b	11	0.785714	4.16891e-16
XM_020826346.2	receptor-like protein 7	XR_003701381.1	sly-miR395a	11	0.785714	4.16891e-16
XM_020826355.2	very-long-chain aldehyde decarbonylase GL1-8	TCONS_00026869	aly-miR167a-5p	13	0.866667	2.35345e-20
XM_020826355.2	very-long-chain aldehyde decarbonylase GL1-8	TCONS_00026869	bna-miR167a	13	0.866667	2.35345e-20
XM_020826355.2	very-long-chain aldehyde decarbonylase GL1-8	XR_003702199.1	aly-miR167a-5p	13	0.342105	2.35345e-20
XM_020826355.2	very-long-chain aldehyde decarbonylase GL1-8	XR_003702199.1	bna-miR167a	13	0.342105	2.35345e-20
XM_020826355.2	very-long-chain aldehyde decarbonylase GL1-8	XR_003702200.1	aly-miR167a-5p	13	0.361111	2.35345e-20
XM_020826355.2	very-long-chain aldehyde decarbonylase GL1-8	XR_003702200.1	bna-miR167a	13	0.361111	2.35345e-20
XM_020826355.2	very-long-chain aldehyde decarbonylase GL1-8	TCONS_00018697	aly-miR167a-5p	11	0.916667	1.23695e-15
XM_020826355.2	very-long-chain aldehyde decarbonylase GL1-8	TCONS_00018697	bna-miR167a	11	0.916667	1.23695e-15
XM_020826714.2	chloride channel protein CLC-c, transcript variant X2	XR_003701426.1	aau-miR319	13	0.464286	7.82158e-13
XM_020826714.2	chloride channel protein CLC-c, transcript variant X2	XR_003701426.1	aly-miR159c-3p	13	0.464286	7.82158e-13
XM_020826714.2	chloride channel protein CLC-c, transcript variant X2	XR_003701426.1	atr-miR319a	13	0.464286	7.82158e-13
XM_020826714.2	chloride channel protein CLC-c, transcript variant X2	XR_003701426.1	cme-miR319c	13	0.464286	7.82158e-13
XM_020826714.2	chloride channel protein CLC-c, transcript variant X2	XR_003701426.1	gma-miR319g	13	0.464286	7.82158e-13
XM_020826714.2	chloride channel protein CLC-c, transcript variant X2	XR_003701426.1	gma-miR319p	13	0.464286	7.82158e-13
XM_020826714.2	chloride channel protein CLC-c, transcript variant X2	XR_003701426.1	mtr-miR319c-3p	13	0.464286	7.82158e-13
XM_020826714.2	chloride channel protein CLC-c, transcript variant X2	XR_003701426.1	pta-miR319	13	0.464286	7.82158e-13
XM_020827399.2	actin	TCONS_00026869	aly-miR167a-5p	14	0.933333	9.36109e-20
XM_020827399.2	actin	TCONS_00026869	bna-miR167a	14	0.933333	9.36109e-20
XM_020827399.2	actin	XR_003702199.1	aly-miR167a-5p	13	0.342105	1.61028e-17
XM_020827399.2	actin	XR_003702199.1	bna-miR167a	13	0.342105	1.61028e-17
XM_020827399.2	actin	XR_003702200.1	aly-miR167a-5p	13	0.361111	1.61028e-17
XM_020827399.2	actin	XR_003702200.1	bna-miR167a	13	0.361111	1.61028e-17
XM_020827399.2	actin	TCONS_00018697	aly-miR167a-5p	11	0.916667	1.58459e-13
XM_020827399.2	actin	TCONS_00018697	bna-miR167a	11	0.916667	1.58459e-13
XM_020827722.2	transmembrane 9 superfamily member 11	XR_002303219.2	aly-miR156a-5p	12	0.315789	7.26539e-14
XM_020827722.2	transmembrane 9 superfamily member 11	XR_002303219.2	aly-miR156g-5p	12	0.315789	7.26539e-14
XM_020827722.2	transmembrane 9 superfamily member 11	XR_002303219.2	bna-miR156a	12	0.315789	7.26539e-14
XM_020827722.2	transmembrane 9 superfamily member 11	XR_002303219.2	cca-miR156b	12	0.315789	7.26539e-14
XM_020827722.2	transmembrane 9 superfamily member 11	XR_002303219.2	gma-miR156q	12	0.315789	7.26539e-14
XM_020827722.2	transmembrane 9 superfamily member 11	XR_002303219.2	pab-miR156b	12	0.315789	7.26539e-14
XM_020827722.2	transmembrane 9 superfamily member 11	XR_002303219.2	sbi-miR156e	12	0.315789	7.26539e-14
XM_020827722.2	transmembrane 9 superfamily member 11	XR_003702334.1	aly-miR156a-5p	11	0.578947	3.85302e-12
XM_020827722.2	transmembrane 9 superfamily member 11	XR_003702334.1	aly-miR156g-5p	11	0.578947	3.85302e-12
XM_020827722.2	transmembrane 9 superfamily member 11	XR_003702334.1	bna-miR156a	11	0.578947	3.85302e-12
XM_020827722.2	transmembrane 9 superfamily member 11	XR_003702334.1	cca-miR156b	11	0.578947	3.85302e-12
XM_020827722.2	transmembrane 9 superfamily member 11	XR_003702334.1	gma-miR156q	11	0.578947	3.85302e-12
XM_020827722.2	transmembrane 9 superfamily member 11	XR_003702334.1	pab-miR156b	11	0.578947	3.85302e-12
XM_020827828.2	trifunctional UDP-glucose 4,6-dehydratase/UDP-4-keto-6-deoxy-D-glucose 3,5-epimerase/UDP-4-keto-L-rhamnose-reductase RHM1	TCONS_00032841	bdi-miR159a-3p	10	0.37037	2.46264e-18
XM_020827828.2	trifunctional UDP-glucose 4,6-dehydratase/UDP-4-keto-6-deoxy-D-glucose 3,5-epimerase/UDP-4-keto-L-rhamnose-reductase RHM1	TCONS_00032841	cpa-miR159b	10	0.37037	2.46264e-18
XM_020827828.2	trifunctional UDP-glucose 4,6-dehydratase/UDP-4-keto-6-deoxy-D-glucose 3,5-epimerase/UDP-4-keto-L-rhamnose-reductase RHM1	TCONS_00032841	osa-miR159f	10	0.37037	2.46264e-18
XM_020827828.2	trifunctional UDP-glucose 4,6-dehydratase/UDP-4-keto-6-deoxy-D-glucose 3,5-epimerase/UDP-4-keto-L-rhamnose-reductase RHM1	TCONS_00032841	pta-miR159c	10	0.37037	2.46264e-18
XM_020827828.2	trifunctional UDP-glucose 4,6-dehydratase/UDP-4-keto-6-deoxy-D-glucose 3,5-epimerase/UDP-4-keto-L-rhamnose-reductase RHM1	TCONS_00032841	ptc-miR159d	10	0.37037	2.46264e-18
XM_020827828.2	trifunctional UDP-glucose 4,6-dehydratase/UDP-4-keto-6-deoxy-D-glucose 3,5-epimerase/UDP-4-keto-L-rhamnose-reductase RHM1	TCONS_00032842	bdi-miR159a-3p	10	0.322581	2.46264e-18
XM_020827828.2	trifunctional UDP-glucose 4,6-dehydratase/UDP-4-keto-6-deoxy-D-glucose 3,5-epimerase/UDP-4-keto-L-rhamnose-reductase RHM1	TCONS_00032842	cpa-miR159b	10	0.322581	2.46264e-18
XM_020827828.2	trifunctional UDP-glucose 4,6-dehydratase/UDP-4-keto-6-deoxy-D-glucose 3,5-epimerase/UDP-4-keto-L-rhamnose-reductase RHM1	TCONS_00032842	osa-miR159f	10	0.322581	2.46264e-18
XM_020827828.2	trifunctional UDP-glucose 4,6-dehydratase/UDP-4-keto-6-deoxy-D-glucose 3,5-epimerase/UDP-4-keto-L-rhamnose-reductase RHM1	TCONS_00032842	pta-miR159c	10	0.322581	2.46264e-18
XM_020827828.2	trifunctional UDP-glucose 4,6-dehydratase/UDP-4-keto-6-deoxy-D-glucose 3,5-epimerase/UDP-4-keto-L-rhamnose-reductase RHM1	TCONS_00032842	ptc-miR159d	10	0.322581	2.46264e-18
XM_020828148.2	arginine decarboxylase-like	XR_002303219.2	aly-miR157d-5p	10	0.263158	7.37801e-15
XM_020828148.2	arginine decarboxylase-like	XR_002303219.2	gma-miR156q	10	0.263158	7.37801e-15
XM_020828148.2	arginine decarboxylase-like	XR_002303219.2	sbi-miR156e	10	0.263158	7.37801e-15
XM_020829303.2	cycloartenol synthase, transcript variant X4	TCONS_00024879	aly-miR160a-5p	10	0.909091	7.37801e-15
XM_020829303.2	cycloartenol synthase, transcript variant X4	TCONS_00024879	csi-miR160c-5p	10	0.909091	7.37801e-15
XM_020829306.2	cycloartenol synthase, transcript variant X6	TCONS_00024879	aly-miR160a-5p	10	0.909091	7.37801e-15
XM_020829306.2	cycloartenol synthase, transcript variant X6	TCONS_00024879	csi-miR160c-5p	10	0.909091	7.37801e-15
XM_020830258.2	probable metal-nicotianamine transporter YSL9, transcript variant X1	TCONS_00033747	ahy-miR156b-5p	13	0.8125	3.56679e-14
XM_020830258.2	probable metal-nicotianamine transporter YSL9, transcript variant X1	TCONS_00033747	aly-miR157d-5p	13	0.8125	3.56679e-14
XM_020830258.2	probable metal-nicotianamine transporter YSL9, transcript variant X1	TCONS_00033747	bcy-miR156	13	0.8125	3.56679e-14
XM_020830258.2	probable metal-nicotianamine transporter YSL9, transcript variant X1	TCONS_00033747	gma-miR156e	13	0.8125	3.56679e-14
XM_020830258.2	probable metal-nicotianamine transporter YSL9, transcript variant X1	TCONS_00033747	gma-miR156r	13	0.8125	3.56679e-14
XM_020830426.2	DNA replication licensing factor MCM2	TCONS_00025990	aly-miR395d-3p	11	0.916667	1.58459e-13
XM_020830426.2	DNA replication licensing factor MCM2	TCONS_00025990	aof-miR395a	11	0.916667	1.58459e-13
XM_020830426.2	DNA replication licensing factor MCM2	TCONS_00025990	ata-miR395e-3p	11	0.916667	1.58459e-13
XM_020830426.2	DNA replication licensing factor MCM2	TCONS_00025990	cme-miR395b	11	0.916667	1.58459e-13
XM_020830426.2	DNA replication licensing factor MCM2	TCONS_00025990	eun-miR395-3p	11	0.916667	1.58459e-13
XM_020830426.2	DNA replication licensing factor MCM2	TCONS_00025990	osa-miR395b	11	0.916667	1.58459e-13
XM_020830426.2	DNA replication licensing factor MCM2	TCONS_00025990	sly-miR395a	11	0.916667	1.58459e-13
XM_020830426.2	DNA replication licensing factor MCM2	XR_003701379.1	aly-miR395d-3p	11	0.785714	1.58459e-13
XM_020830426.2	DNA replication licensing factor MCM2	XR_003701379.1	cme-miR395b	11	0.785714	1.58459e-13
XM_020830426.2	DNA replication licensing factor MCM2	XR_003701379.1	eun-miR395-3p	11	0.785714	1.58459e-13
XM_020830426.2	DNA replication licensing factor MCM2	XR_003701379.1	osa-miR395b	11	0.785714	1.58459e-13
XM_020830426.2	DNA replication licensing factor MCM2	XR_003701379.1	sly-miR395a	11	0.785714	1.58459e-13
XM_020830426.2	DNA replication licensing factor MCM2	XR_003701381.1	aly-miR395d-3p	11	0.785714	1.58459e-13
XM_020830426.2	DNA replication licensing factor MCM2	XR_003701381.1	cme-miR395b	11	0.785714	1.58459e-13
XM_020830426.2	DNA replication licensing factor MCM2	XR_003701381.1	eun-miR395-3p	11	0.785714	1.58459e-13
XM_020830426.2	DNA replication licensing factor MCM2	XR_003701381.1	osa-miR395b	11	0.785714	1.58459e-13
XM_020830426.2	DNA replication licensing factor MCM2	XR_003701381.1	sly-miR395a	11	0.785714	1.58459e-13
XM_020830426.2	DNA replication licensing factor MCM2	TCONS_00024832	aly-miR395d-3p	10	0.833333	9.64503e-12
XM_020830426.2	DNA replication licensing factor MCM2	TCONS_00024832	ata-miR395e-3p	10	0.833333	9.64503e-12
XM_020830426.2	DNA replication licensing factor MCM2	TCONS_00024832	cme-miR395b	10	0.833333	9.64503e-12
XM_020830426.2	DNA replication licensing factor MCM2	TCONS_00024832	eun-miR395-3p	10	0.833333	9.64503e-12
XM_020830426.2	DNA replication licensing factor MCM2	TCONS_00024832	sly-miR395a	10	0.833333	9.64503e-12
XM_020831182.2	ras GTPase-activating protein-binding protein 2, transcript variant X3	XR_002303219.2	aly-miR156a-5p	13	0.342105	6.46572e-15
XM_020831182.2	ras GTPase-activating protein-binding protein 2, transcript variant X3	XR_002303219.2	aly-miR156g-5p	13	0.342105	6.46572e-15
XM_020831182.2	ras GTPase-activating protein-binding protein 2, transcript variant X3	XR_002303219.2	aly-miR157d-5p	13	0.342105	6.46572e-15
XM_020831182.2	ras GTPase-activating protein-binding protein 2, transcript variant X3	XR_002303219.2	bna-miR156a	13	0.342105	6.46572e-15
XM_020831182.2	ras GTPase-activating protein-binding protein 2, transcript variant X3	XR_002303219.2	cca-miR156b	13	0.342105	6.46572e-15
XM_020831182.2	ras GTPase-activating protein-binding protein 2, transcript variant X3	XR_002303219.2	gma-miR156q	13	0.342105	6.46572e-15
XM_020831182.2	ras GTPase-activating protein-binding protein 2, transcript variant X3	XR_003702334.1	aly-miR156a-5p	11	0.578947	1.60698e-11
XM_020831182.2	ras GTPase-activating protein-binding protein 2, transcript variant X3	XR_003702334.1	aly-miR156g-5p	11	0.578947	1.60698e-11
XM_020831182.2	ras GTPase-activating protein-binding protein 2, transcript variant X3	XR_003702334.1	aly-miR157d-5p	11	0.578947	1.60698e-11
XM_020831182.2	ras GTPase-activating protein-binding protein 2, transcript variant X3	XR_003702334.1	bna-miR156a	11	0.578947	1.60698e-11
XM_020831182.2	ras GTPase-activating protein-binding protein 2, transcript variant X3	XR_003702334.1	cca-miR156b	11	0.578947	1.60698e-11
XM_020831182.2	ras GTPase-activating protein-binding protein 2, transcript variant X3	XR_003702334.1	gma-miR156q	11	0.578947	1.60698e-11
XM_020831355.2	5-methyltetrahydropteroyltriglutamate--homocysteine methyltransferase 2, transcript variant X3	XR_002303219.2	aly-miR156a-5p	15	0.394737	3.55048e-06
XM_020831355.2	5-methyltetrahydropteroyltriglutamate--homocysteine methyltransferase 2, transcript variant X3	XR_002303219.2	aly-miR156g-5p	15	0.394737	3.55048e-06
XM_020831355.2	5-methyltetrahydropteroyltriglutamate--homocysteine methyltransferase 2, transcript variant X3	XR_002303219.2	aly-miR157d-5p	15	0.394737	3.55048e-06
XM_020831355.2	5-methyltetrahydropteroyltriglutamate--homocysteine methyltransferase 2, transcript variant X3	XR_002303219.2	bna-miR156a	15	0.394737	3.55048e-06
XM_020831355.2	5-methyltetrahydropteroyltriglutamate--homocysteine methyltransferase 2, transcript variant X3	XR_002303219.2	cca-miR156b	15	0.394737	3.55048e-06
XM_020831355.2	5-methyltetrahydropteroyltriglutamate--homocysteine methyltransferase 2, transcript variant X3	XR_002303219.2	gma-miR156q	15	0.394737	3.55048e-06
XM_020831355.2	5-methyltetrahydropteroyltriglutamate--homocysteine methyltransferase 2, transcript variant X3	XR_002303219.2	pab-miR156b	15	0.394737	3.55048e-06
XM_020831355.2	5-methyltetrahydropteroyltriglutamate--homocysteine methyltransferase 2, transcript variant X3	XR_002303219.2	sbi-miR156e	15	0.394737	3.55048e-06
XM_020831355.2	5-methyltetrahydropteroyltriglutamate--homocysteine methyltransferase 2, transcript variant X3	TCONS_00033747	ahy-miR156b-5p	14	0.875	2.04034e-05
XM_020831355.2	5-methyltetrahydropteroyltriglutamate--homocysteine methyltransferase 2, transcript variant X3	TCONS_00033747	aly-miR157d-5p	14	0.875	2.04034e-05
XM_020831355.2	5-methyltetrahydropteroyltriglutamate--homocysteine methyltransferase 2, transcript variant X3	TCONS_00033747	gma-miR156e	14	0.875	2.04034e-05
XM_020831355.2	5-methyltetrahydropteroyltriglutamate--homocysteine methyltransferase 2, transcript variant X3	TCONS_00033747	gma-miR156r	14	0.875	2.04034e-05
XM_020831355.2	5-methyltetrahydropteroyltriglutamate--homocysteine methyltransferase 2, transcript variant X3	XR_003702334.1	aly-miR156a-5p	14	0.736842	2.04034e-05
XM_020831355.2	5-methyltetrahydropteroyltriglutamate--homocysteine methyltransferase 2, transcript variant X3	XR_003702334.1	aly-miR156g-5p	14	0.736842	2.04034e-05
XM_020831355.2	5-methyltetrahydropteroyltriglutamate--homocysteine methyltransferase 2, transcript variant X3	XR_003702334.1	aly-miR157d-5p	14	0.736842	2.04034e-05
XM_020831355.2	5-methyltetrahydropteroyltriglutamate--homocysteine methyltransferase 2, transcript variant X3	XR_003702334.1	bna-miR156a	14	0.736842	2.04034e-05
XM_020831355.2	5-methyltetrahydropteroyltriglutamate--homocysteine methyltransferase 2, transcript variant X3	XR_003702334.1	cca-miR156b	14	0.736842	2.04034e-05
XM_020831355.2	5-methyltetrahydropteroyltriglutamate--homocysteine methyltransferase 2, transcript variant X3	XR_003702334.1	gma-miR156q	14	0.736842	2.04034e-05
XM_020831355.2	5-methyltetrahydropteroyltriglutamate--homocysteine methyltransferase 2, transcript variant X3	XR_003702334.1	pab-miR156b	14	0.736842	2.04034e-05
XM_020832651.2	glutamate receptor 3.4, transcript variant X1	TCONS_00032841	bdi-miR159a-3p	10	0.37037	9.89336e-08
XM_020832651.2	glutamate receptor 3.4, transcript variant X1	TCONS_00032841	cme-miR159b	10	0.37037	9.89336e-08
XM_020832651.2	glutamate receptor 3.4, transcript variant X1	TCONS_00032841	cpa-miR159b	10	0.37037	9.89336e-08
XM_020832651.2	glutamate receptor 3.4, transcript variant X1	TCONS_00032841	fve-miR159c	10	0.37037	9.89336e-08
XM_020832651.2	glutamate receptor 3.4, transcript variant X1	TCONS_00032841	osa-miR159d	10	0.37037	9.89336e-08
XM_020832651.2	glutamate receptor 3.4, transcript variant X1	TCONS_00032841	osa-miR159f	10	0.37037	9.89336e-08
XM_020832651.2	glutamate receptor 3.4, transcript variant X1	TCONS_00032841	pta-miR159a	10	0.37037	9.89336e-08
XM_020832651.2	glutamate receptor 3.4, transcript variant X1	TCONS_00032841	pta-miR159c	10	0.37037	9.89336e-08
XM_020832651.2	glutamate receptor 3.4, transcript variant X1	TCONS_00032841	ptc-miR159d	10	0.37037	9.89336e-08
XM_020832651.2	glutamate receptor 3.4, transcript variant X1	TCONS_00032842	bdi-miR159a-3p	10	0.322581	9.89336e-08
XM_020832651.2	glutamate receptor 3.4, transcript variant X1	TCONS_00032842	cme-miR159b	10	0.322581	9.89336e-08
XM_020832651.2	glutamate receptor 3.4, transcript variant X1	TCONS_00032842	cpa-miR159b	10	0.322581	9.89336e-08
XM_020832651.2	glutamate receptor 3.4, transcript variant X1	TCONS_00032842	fve-miR159c	10	0.322581	9.89336e-08
XM_020832651.2	glutamate receptor 3.4, transcript variant X1	TCONS_00032842	osa-miR159d	10	0.322581	9.89336e-08
XM_020832651.2	glutamate receptor 3.4, transcript variant X1	TCONS_00032842	osa-miR159f	10	0.322581	9.89336e-08
XM_020832651.2	glutamate receptor 3.4, transcript variant X1	TCONS_00032842	pta-miR159a	10	0.322581	9.89336e-08
XM_020832651.2	glutamate receptor 3.4, transcript variant X1	TCONS_00032842	pta-miR159c	10	0.322581	9.89336e-08
XM_020832651.2	glutamate receptor 3.4, transcript variant X1	TCONS_00032842	ptc-miR159d	10	0.322581	9.89336e-08
XM_020832651.2	glutamate receptor 3.4, transcript variant X1	XR_002305298.2	bdi-miR159a-3p	10	0.588235	9.89336e-08
XM_020832651.2	glutamate receptor 3.4, transcript variant X1	XR_002305298.2	cpa-miR159b	10	0.588235	9.89336e-08
XM_020832651.2	glutamate receptor 3.4, transcript variant X1	XR_002305298.2	csi-miR159c-3p	10	0.588235	9.89336e-08
XM_020832651.2	glutamate receptor 3.4, transcript variant X1	XR_002305298.2	gma-miR319p	10	0.588235	9.89336e-08
XM_020832651.2	glutamate receptor 3.4, transcript variant X1	XR_002305298.2	mes-miR319h	10	0.588235	9.89336e-08
XM_020832651.2	glutamate receptor 3.4, transcript variant X1	XR_002305298.2	NW_021320138.1_11162	10	0.588235	9.89336e-08
XM_020832651.2	glutamate receptor 3.4, transcript variant X1	XR_002305298.2	osa-miR159f	10	0.588235	9.89336e-08
XM_020832651.2	glutamate receptor 3.4, transcript variant X1	XR_002305298.2	ppt-miR319a	10	0.588235	9.89336e-08
XM_020832651.2	glutamate receptor 3.4, transcript variant X1	XR_002305298.2	pta-miR159c	10	0.588235	9.89336e-08
XM_020832651.2	glutamate receptor 3.4, transcript variant X1	XR_002305298.2	ptc-miR159d	10	0.588235	9.89336e-08
XM_020833235.2	zinc finger Ran-binding domain-containing protein 2	TCONS_00026869	aly-miR167a-5p	10	0.666667	0
XM_020833351.2	repetitive proline-rich cell wall protein 2	XR_003701652.1	ahy-miR156b-5p	16	0.842105	1.84968e-10
XM_020833351.2	repetitive proline-rich cell wall protein 2	XR_003701652.1	aly-miR156a-5p	16	0.842105	1.84968e-10
XM_020833351.2	repetitive proline-rich cell wall protein 2	XR_003701652.1	aly-miR157d-5p	16	0.842105	1.84968e-10
XM_020833351.2	repetitive proline-rich cell wall protein 2	XR_003701652.1	bna-miR156a	16	0.842105	1.84968e-10
XM_020833351.2	repetitive proline-rich cell wall protein 2	XR_003701652.1	cca-miR156b	16	0.842105	1.84968e-10
XM_020833351.2	repetitive proline-rich cell wall protein 2	XR_003701652.1	gma-miR156e	16	0.842105	1.84968e-10
XM_020833351.2	repetitive proline-rich cell wall protein 2	XR_003701652.1	gma-miR156q	16	0.842105	1.84968e-10
XM_020833351.2	repetitive proline-rich cell wall protein 2	XR_003701652.1	gma-miR156r	16	0.842105	1.84968e-10
XM_020833351.2	repetitive proline-rich cell wall protein 2	XR_003701652.1	mtr-miR156j	16	0.842105	1.84968e-10
XM_020833351.2	repetitive proline-rich cell wall protein 2	XR_003701652.1	pab-miR156b	16	0.842105	1.84968e-10
XM_020833351.2	repetitive proline-rich cell wall protein 2	TCONS_00033747	ahy-miR156b-5p	15	0.9375	2.48354e-09
XM_020833351.2	repetitive proline-rich cell wall protein 2	TCONS_00033747	aly-miR157d-5p	15	0.9375	2.48354e-09
XM_020833351.2	repetitive proline-rich cell wall protein 2	TCONS_00033747	bcy-miR156	15	0.9375	2.48354e-09
XM_020833351.2	repetitive proline-rich cell wall protein 2	TCONS_00033747	gma-miR156e	15	0.9375	2.48354e-09
XM_020833351.2	repetitive proline-rich cell wall protein 2	TCONS_00033747	gma-miR156r	15	0.9375	2.48354e-09
XM_020833351.2	repetitive proline-rich cell wall protein 2	XR_002303219.2	aly-miR156a-5p	15	0.394737	2.48354e-09
XM_020833351.2	repetitive proline-rich cell wall protein 2	XR_002303219.2	aly-miR156g-5p	15	0.394737	2.48354e-09
XM_020833351.2	repetitive proline-rich cell wall protein 2	XR_002303219.2	aly-miR157d-5p	15	0.394737	2.48354e-09
XM_020833351.2	repetitive proline-rich cell wall protein 2	XR_002303219.2	bna-miR156a	15	0.394737	2.48354e-09
XM_020833351.2	repetitive proline-rich cell wall protein 2	XR_002303219.2	cca-miR156b	15	0.394737	2.48354e-09
XM_020833351.2	repetitive proline-rich cell wall protein 2	XR_002303219.2	gma-miR156q	15	0.394737	2.48354e-09
XM_020833351.2	repetitive proline-rich cell wall protein 2	XR_002303219.2	pab-miR156b	15	0.394737	2.48354e-09
XM_020833351.2	repetitive proline-rich cell wall protein 2	XR_002303219.2	sbi-miR156e	15	0.394737	2.48354e-09
XM_020833351.2	repetitive proline-rich cell wall protein 2	XR_003702334.1	aly-miR156a-5p	14	0.736842	2.86933e-08
XM_020833351.2	repetitive proline-rich cell wall protein 2	XR_003702334.1	aly-miR156g-5p	14	0.736842	2.86933e-08
XM_020833351.2	repetitive proline-rich cell wall protein 2	XR_003702334.1	aly-miR157d-5p	14	0.736842	2.86933e-08
XM_020833351.2	repetitive proline-rich cell wall protein 2	XR_003702334.1	bna-miR156a	14	0.736842	2.86933e-08
XM_020833351.2	repetitive proline-rich cell wall protein 2	XR_003702334.1	cca-miR156b	14	0.736842	2.86933e-08
XM_020833351.2	repetitive proline-rich cell wall protein 2	XR_003702334.1	gma-miR156q	14	0.736842	2.86933e-08
XM_020833351.2	repetitive proline-rich cell wall protein 2	XR_003702334.1	pab-miR156b	14	0.736842	2.86933e-08
XM_020833399.2	uncharacterized LOC110104339	TCONS_00010760	aau-miR396	10	0.833333	5.86664e-20
XM_020833399.2	uncharacterized LOC110104339	TCONS_00010760	gma-miR396e	10	0.833333	5.86664e-20
XM_020833399.2	uncharacterized LOC110104339	TCONS_00010760	gma-miR396h	10	0.833333	5.86664e-20
XM_020833399.2	uncharacterized LOC110104339	TCONS_00010760	mdm-miR396a	10	0.833333	5.86664e-20
XM_020833399.2	uncharacterized LOC110104339	TCONS_00010760	NW_021318846.1_2647_star	10	0.833333	5.86664e-20
XM_020833399.2	uncharacterized LOC110104339	TCONS_00010760	pab-miR396a-5p	10	0.833333	5.86664e-20
XM_020833399.2	uncharacterized LOC110104339	TCONS_00010760	vca-miR396-5p	10	0.833333	5.86664e-20
XM_020833399.2	uncharacterized LOC110104339	XR_003700291.1	aau-miR396	10	0.37037	5.86664e-20
XM_020833399.2	uncharacterized LOC110104339	XR_003700291.1	gma-miR396e	10	0.37037	5.86664e-20
XM_020833399.2	uncharacterized LOC110104339	XR_003700291.1	gma-miR396h	10	0.37037	5.86664e-20
XM_020833399.2	uncharacterized LOC110104339	XR_003700291.1	mdm-miR396a	10	0.37037	5.86664e-20
XM_020833399.2	uncharacterized LOC110104339	XR_003700291.1	NW_021318846.1_2647_star	10	0.37037	5.86664e-20
XM_020833399.2	uncharacterized LOC110104339	XR_003700291.1	pab-miR396a-5p	10	0.37037	5.86664e-20
XM_020833399.2	uncharacterized LOC110104339	XR_003700291.1	vca-miR396-5p	10	0.37037	5.86664e-20
XM_020833399.2	uncharacterized LOC110104339	XR_003701085.1	aau-miR396	10	0.769231	5.86664e-20
XM_020833399.2	uncharacterized LOC110104339	XR_003701085.1	gma-miR396e	10	0.769231	5.86664e-20
XM_020833399.2	uncharacterized LOC110104339	XR_003701085.1	gma-miR396h	10	0.769231	5.86664e-20
XM_020833399.2	uncharacterized LOC110104339	XR_003701085.1	mdm-miR396a	10	0.769231	5.86664e-20
XM_020833399.2	uncharacterized LOC110104339	XR_003701085.1	NW_021318846.1_2647_star	10	0.769231	5.86664e-20
XM_020833399.2	uncharacterized LOC110104339	XR_003701085.1	pab-miR396a-5p	10	0.769231	5.86664e-20
XM_020833399.2	uncharacterized LOC110104339	XR_003701085.1	vca-miR396-5p	10	0.769231	5.86664e-20
XM_020833399.2	uncharacterized LOC110104339	XR_003701912.1	aau-miR396	10	0.588235	5.86664e-20
XM_020833399.2	uncharacterized LOC110104339	XR_003701912.1	gma-miR396e	10	0.588235	5.86664e-20
XM_020833399.2	uncharacterized LOC110104339	XR_003701912.1	gma-miR396h	10	0.588235	5.86664e-20
XM_020833399.2	uncharacterized LOC110104339	XR_003701912.1	mdm-miR396a	10	0.588235	5.86664e-20
XM_020833399.2	uncharacterized LOC110104339	XR_003701912.1	NW_021318846.1_2647_star	10	0.588235	5.86664e-20
XM_020833399.2	uncharacterized LOC110104339	XR_003701912.1	pab-miR396a-5p	10	0.588235	5.86664e-20
XM_020833399.2	uncharacterized LOC110104339	XR_003701912.1	vca-miR396-5p	10	0.588235	5.86664e-20
XM_020834082.2	probable strigolactone esterase DAD2	TCONS_00017098	aly-miR172a-3p	13	0.928571	1.65794e-22
XM_020834082.2	probable strigolactone esterase DAD2	TCONS_00017098	aly-miR172e-3p	13	0.928571	1.65794e-22
XM_020834082.2	probable strigolactone esterase DAD2	TCONS_00017098	aqc-miR172b	13	0.928571	1.65794e-22
XM_020834082.2	probable strigolactone esterase DAD2	TCONS_00017098	ata-miR172a-3p	13	0.928571	1.65794e-22
XM_020834447.2	cis-zeatin O-glucosyltransferase 2-like	XR_003701085.1	aau-miR396	13	1	0
XM_020834447.2	cis-zeatin O-glucosyltransferase 2-like	XR_003701085.1	aof-miR396a	13	1	0
XM_020834447.2	cis-zeatin O-glucosyltransferase 2-like	XR_003701085.1	gma-miR396e	13	1	0
XM_020834447.2	cis-zeatin O-glucosyltransferase 2-like	XR_003701085.1	gma-miR396h	13	1	0
XM_020834447.2	cis-zeatin O-glucosyltransferase 2-like	XR_003701085.1	mdm-miR396a	13	1	0
XM_020834447.2	cis-zeatin O-glucosyltransferase 2-like	XR_003701085.1	NW_021318846.1_2647_star	13	1	0
XM_020834447.2	cis-zeatin O-glucosyltransferase 2-like	XR_003701085.1	pab-miR396a-5p	13	1	0
XM_020834447.2	cis-zeatin O-glucosyltransferase 2-like	XR_003701085.1	vca-miR396-5p	13	1	0
XM_020834447.2	cis-zeatin O-glucosyltransferase 2-like	TCONS_00010760	aau-miR396	12	1	3.51794e-25
XM_020834447.2	cis-zeatin O-glucosyltransferase 2-like	TCONS_00010760	gma-miR396e	12	1	3.51794e-25
XM_020834447.2	cis-zeatin O-glucosyltransferase 2-like	TCONS_00010760	gma-miR396h	12	1	3.51794e-25
XM_020834447.2	cis-zeatin O-glucosyltransferase 2-like	TCONS_00010760	mdm-miR396a	12	1	3.51794e-25
XM_020834447.2	cis-zeatin O-glucosyltransferase 2-like	TCONS_00010760	NW_021318846.1_2647_star	12	1	3.51794e-25
XM_020834447.2	cis-zeatin O-glucosyltransferase 2-like	TCONS_00010760	pab-miR396a-5p	12	1	3.51794e-25
XM_020834447.2	cis-zeatin O-glucosyltransferase 2-like	TCONS_00010760	vca-miR396-5p	12	1	3.51794e-25
XM_020834447.2	cis-zeatin O-glucosyltransferase 2-like	XR_003700291.1	aau-miR396	12	0.444444	3.51794e-25
XM_020834447.2	cis-zeatin O-glucosyltransferase 2-like	XR_003700291.1	aof-miR396a	12	0.444444	3.51794e-25
XM_020834447.2	cis-zeatin O-glucosyltransferase 2-like	XR_003700291.1	gma-miR396e	12	0.444444	3.51794e-25
XM_020834447.2	cis-zeatin O-glucosyltransferase 2-like	XR_003700291.1	gma-miR396h	12	0.444444	3.51794e-25
XM_020834447.2	cis-zeatin O-glucosyltransferase 2-like	XR_003700291.1	mdm-miR396a	12	0.444444	3.51794e-25
XM_020834447.2	cis-zeatin O-glucosyltransferase 2-like	XR_003700291.1	NW_021318846.1_2647_star	12	0.444444	3.51794e-25
XM_020834447.2	cis-zeatin O-glucosyltransferase 2-like	XR_003700291.1	pab-miR396a-5p	12	0.444444	3.51794e-25
XM_020834447.2	cis-zeatin O-glucosyltransferase 2-like	XR_003700291.1	vca-miR396-5p	12	0.444444	3.51794e-25
XM_020834447.2	cis-zeatin O-glucosyltransferase 2-like	XR_003701912.1	aau-miR396	12	0.705882	3.51794e-25
XM_020834447.2	cis-zeatin O-glucosyltransferase 2-like	XR_003701912.1	aof-miR396a	12	0.705882	3.51794e-25
XM_020834447.2	cis-zeatin O-glucosyltransferase 2-like	XR_003701912.1	gma-miR396e	12	0.705882	3.51794e-25
XM_020834447.2	cis-zeatin O-glucosyltransferase 2-like	XR_003701912.1	gma-miR396h	12	0.705882	3.51794e-25
XM_020834447.2	cis-zeatin O-glucosyltransferase 2-like	XR_003701912.1	mdm-miR396a	12	0.705882	3.51794e-25
XM_020834447.2	cis-zeatin O-glucosyltransferase 2-like	XR_003701912.1	NW_021318846.1_2647_star	12	0.705882	3.51794e-25
XM_020834447.2	cis-zeatin O-glucosyltransferase 2-like	XR_003701912.1	pab-miR396a-5p	12	0.705882	3.51794e-25
XM_020834447.2	cis-zeatin O-glucosyltransferase 2-like	XR_003701912.1	vca-miR396-5p	12	0.705882	3.51794e-25
XM_020834958.2	ubiquitin carboxyl-terminal hydrolase 12	TCONS_00017098	aly-miR172a-3p	13	0.928571	5.26498e-21
XM_020834958.2	ubiquitin carboxyl-terminal hydrolase 12	TCONS_00017098	aly-miR172e-3p	13	0.928571	5.26498e-21
XM_020834958.2	ubiquitin carboxyl-terminal hydrolase 12	TCONS_00017098	aqc-miR172b	13	0.928571	5.26498e-21
XM_020834958.2	ubiquitin carboxyl-terminal hydrolase 12	TCONS_00017098	ata-miR172a-3p	13	0.928571	5.26498e-21
XM_020834958.2	ubiquitin carboxyl-terminal hydrolase 12	TCONS_00017098	gma-miR172k	13	0.928571	5.26498e-21
XM_020835639.2	nudix hydrolase 9, transcript variant X2	TCONS_00010760	aau-miR396	12	1	3.51794e-25
XM_020835639.2	nudix hydrolase 9, transcript variant X2	TCONS_00010760	gma-miR396e	12	1	3.51794e-25
XM_020835639.2	nudix hydrolase 9, transcript variant X2	TCONS_00010760	gma-miR396h	12	1	3.51794e-25
XM_020835639.2	nudix hydrolase 9, transcript variant X2	TCONS_00010760	mdm-miR396a	12	1	3.51794e-25
XM_020835639.2	nudix hydrolase 9, transcript variant X2	TCONS_00010760	NW_021318846.1_2647_star	12	1	3.51794e-25
XM_020835639.2	nudix hydrolase 9, transcript variant X2	TCONS_00010760	pab-miR396a-5p	12	1	3.51794e-25
XM_020835639.2	nudix hydrolase 9, transcript variant X2	TCONS_00010760	vca-miR396-5p	12	1	3.51794e-25
XM_020835639.2	nudix hydrolase 9, transcript variant X2	XR_003700291.1	aau-miR396	12	0.444444	3.51794e-25
XM_020835639.2	nudix hydrolase 9, transcript variant X2	XR_003700291.1	aof-miR396a	12	0.444444	3.51794e-25
XM_020835639.2	nudix hydrolase 9, transcript variant X2	XR_003700291.1	gma-miR396e	12	0.444444	3.51794e-25
XM_020835639.2	nudix hydrolase 9, transcript variant X2	XR_003700291.1	gma-miR396h	12	0.444444	3.51794e-25
XM_020835639.2	nudix hydrolase 9, transcript variant X2	XR_003700291.1	mdm-miR396a	12	0.444444	3.51794e-25
XM_020835639.2	nudix hydrolase 9, transcript variant X2	XR_003700291.1	NW_021318846.1_2647_star	12	0.444444	3.51794e-25
XM_020835639.2	nudix hydrolase 9, transcript variant X2	XR_003700291.1	pab-miR396a-5p	12	0.444444	3.51794e-25
XM_020835639.2	nudix hydrolase 9, transcript variant X2	XR_003700291.1	vca-miR396-5p	12	0.444444	3.51794e-25
XM_020835639.2	nudix hydrolase 9, transcript variant X2	XR_003701085.1	aau-miR396	12	0.923077	3.51794e-25
XM_020835639.2	nudix hydrolase 9, transcript variant X2	XR_003701085.1	aof-miR396a	12	0.923077	3.51794e-25
XM_020835639.2	nudix hydrolase 9, transcript variant X2	XR_003701085.1	gma-miR396e	12	0.923077	3.51794e-25
XM_020835639.2	nudix hydrolase 9, transcript variant X2	XR_003701085.1	gma-miR396h	12	0.923077	3.51794e-25
XM_020835639.2	nudix hydrolase 9, transcript variant X2	XR_003701085.1	mdm-miR396a	12	0.923077	3.51794e-25
XM_020835639.2	nudix hydrolase 9, transcript variant X2	XR_003701085.1	NW_021318846.1_2647_star	12	0.923077	3.51794e-25
XM_020835639.2	nudix hydrolase 9, transcript variant X2	XR_003701085.1	pab-miR396a-5p	12	0.923077	3.51794e-25
XM_020835639.2	nudix hydrolase 9, transcript variant X2	XR_003701085.1	vca-miR396-5p	12	0.923077	3.51794e-25
XM_020835639.2	nudix hydrolase 9, transcript variant X2	XR_003701912.1	aau-miR396	12	0.705882	3.51794e-25
XM_020835639.2	nudix hydrolase 9, transcript variant X2	XR_003701912.1	aof-miR396a	12	0.705882	3.51794e-25
XM_020835639.2	nudix hydrolase 9, transcript variant X2	XR_003701912.1	gma-miR396e	12	0.705882	3.51794e-25
XM_020835639.2	nudix hydrolase 9, transcript variant X2	XR_003701912.1	gma-miR396h	12	0.705882	3.51794e-25
XM_020835639.2	nudix hydrolase 9, transcript variant X2	XR_003701912.1	mdm-miR396a	12	0.705882	3.51794e-25
XM_020835639.2	nudix hydrolase 9, transcript variant X2	XR_003701912.1	NW_021318846.1_2647_star	12	0.705882	3.51794e-25
XM_020835639.2	nudix hydrolase 9, transcript variant X2	XR_003701912.1	pab-miR396a-5p	12	0.705882	3.51794e-25
XM_020835639.2	nudix hydrolase 9, transcript variant X2	XR_003701912.1	vca-miR396-5p	12	0.705882	3.51794e-25
XM_020835714.2	kinesin-like protein KIN-5A, transcript variant X1	TCONS_00032841	bdi-miR159a-3p	10	0.37037	5.30529e-17
XM_020835714.2	kinesin-like protein KIN-5A, transcript variant X1	TCONS_00032841	cpa-miR159b	10	0.37037	5.30529e-17
XM_020835714.2	kinesin-like protein KIN-5A, transcript variant X1	TCONS_00032841	osa-miR159f	10	0.37037	5.30529e-17
XM_020835714.2	kinesin-like protein KIN-5A, transcript variant X1	TCONS_00032841	pta-miR159c	10	0.37037	5.30529e-17
XM_020835714.2	kinesin-like protein KIN-5A, transcript variant X1	TCONS_00032841	ptc-miR159d	10	0.37037	5.30529e-17
XM_020835714.2	kinesin-like protein KIN-5A, transcript variant X1	TCONS_00032842	bdi-miR159a-3p	10	0.322581	5.30529e-17
XM_020835714.2	kinesin-like protein KIN-5A, transcript variant X1	TCONS_00032842	cpa-miR159b	10	0.322581	5.30529e-17
XM_020835714.2	kinesin-like protein KIN-5A, transcript variant X1	TCONS_00032842	osa-miR159f	10	0.322581	5.30529e-17
XM_020835714.2	kinesin-like protein KIN-5A, transcript variant X1	TCONS_00032842	pta-miR159c	10	0.322581	5.30529e-17
XM_020835714.2	kinesin-like protein KIN-5A, transcript variant X1	TCONS_00032842	ptc-miR159d	10	0.322581	5.30529e-17
XM_020835715.2	kinesin-like protein KIN-5A, transcript variant X2	TCONS_00032841	bdi-miR159a-3p	10	0.37037	5.30529e-17
XM_020835715.2	kinesin-like protein KIN-5A, transcript variant X2	TCONS_00032841	cpa-miR159b	10	0.37037	5.30529e-17
XM_020835715.2	kinesin-like protein KIN-5A, transcript variant X2	TCONS_00032841	osa-miR159f	10	0.37037	5.30529e-17
XM_020835715.2	kinesin-like protein KIN-5A, transcript variant X2	TCONS_00032841	pta-miR159c	10	0.37037	5.30529e-17
XM_020835715.2	kinesin-like protein KIN-5A, transcript variant X2	TCONS_00032841	ptc-miR159d	10	0.37037	5.30529e-17
XM_020835715.2	kinesin-like protein KIN-5A, transcript variant X2	TCONS_00032842	bdi-miR159a-3p	10	0.322581	5.30529e-17
XM_020835715.2	kinesin-like protein KIN-5A, transcript variant X2	TCONS_00032842	cpa-miR159b	10	0.322581	5.30529e-17
XM_020835715.2	kinesin-like protein KIN-5A, transcript variant X2	TCONS_00032842	osa-miR159f	10	0.322581	5.30529e-17
XM_020835715.2	kinesin-like protein KIN-5A, transcript variant X2	TCONS_00032842	pta-miR159c	10	0.322581	5.30529e-17
XM_020835715.2	kinesin-like protein KIN-5A, transcript variant X2	TCONS_00032842	ptc-miR159d	10	0.322581	5.30529e-17
XM_020836650.2	MDIS1-interacting receptor like kinase 2-like	XR_003701426.1	aau-miR319	14	0.5	2.68813e-22
XM_020836650.2	MDIS1-interacting receptor like kinase 2-like	XR_003701426.1	aly-miR159c-3p	14	0.5	2.68813e-22
XM_020836650.2	MDIS1-interacting receptor like kinase 2-like	XR_003701426.1	aly-miR319c-3p	14	0.5	2.68813e-22
XM_020836650.2	MDIS1-interacting receptor like kinase 2-like	XR_003701426.1	atr-miR319a	14	0.5	2.68813e-22
XM_020836650.2	MDIS1-interacting receptor like kinase 2-like	XR_003701426.1	cme-miR319c	14	0.5	2.68813e-22
XM_020836650.2	MDIS1-interacting receptor like kinase 2-like	XR_003701426.1	gma-miR319g	14	0.5	2.68813e-22
XM_020836650.2	MDIS1-interacting receptor like kinase 2-like	XR_003701426.1	gma-miR319p	14	0.5	2.68813e-22
XM_020836650.2	MDIS1-interacting receptor like kinase 2-like	XR_003701426.1	mtr-miR319c-3p	14	0.5	2.68813e-22
XM_020836650.2	MDIS1-interacting receptor like kinase 2-like	XR_003701426.1	pta-miR319	14	0.5	2.68813e-22
XM_020837994.2	nicotinamidase 2, transcript variant X2	TCONS_00017098	aly-miR172a-3p	14	1	4.11909e-28
XM_020837994.2	nicotinamidase 2, transcript variant X2	TCONS_00017098	aly-miR172e-3p	14	1	4.11909e-28
XM_020837994.2	nicotinamidase 2, transcript variant X2	TCONS_00017098	aqc-miR172b	14	1	4.11909e-28
XM_020837994.2	nicotinamidase 2, transcript variant X2	TCONS_00017098	ata-miR172a-3p	14	1	4.11909e-28
XM_020837994.2	nicotinamidase 2, transcript variant X2	TCONS_00017098	gma-miR172k	14	1	4.11909e-28
XM_020838222.2	copper-transporting ATPase HMA5-like	TCONS_00010760	aau-miR396	12	1	1.92357e-18
XM_020838222.2	copper-transporting ATPase HMA5-like	TCONS_00010760	gma-miR396e	12	1	1.92357e-18
XM_020838222.2	copper-transporting ATPase HMA5-like	TCONS_00010760	gma-miR396h	12	1	1.92357e-18
XM_020838222.2	copper-transporting ATPase HMA5-like	TCONS_00010760	mdm-miR396a	12	1	1.92357e-18
XM_020838222.2	copper-transporting ATPase HMA5-like	TCONS_00010760	NW_021318846.1_2647_star	12	1	1.92357e-18
XM_020838222.2	copper-transporting ATPase HMA5-like	TCONS_00010760	pab-miR396a-5p	12	1	1.92357e-18
XM_020838222.2	copper-transporting ATPase HMA5-like	TCONS_00010760	vca-miR396-5p	12	1	1.92357e-18
XM_020838222.2	copper-transporting ATPase HMA5-like	XR_003700291.1	aau-miR396	12	0.444444	1.92357e-18
XM_020838222.2	copper-transporting ATPase HMA5-like	XR_003700291.1	aof-miR396a	12	0.444444	1.92357e-18
XM_020838222.2	copper-transporting ATPase HMA5-like	XR_003700291.1	gma-miR396e	12	0.444444	1.92357e-18
XM_020838222.2	copper-transporting ATPase HMA5-like	XR_003700291.1	gma-miR396h	12	0.444444	1.92357e-18
XM_020838222.2	copper-transporting ATPase HMA5-like	XR_003700291.1	mdm-miR396a	12	0.444444	1.92357e-18
XM_020838222.2	copper-transporting ATPase HMA5-like	XR_003700291.1	NW_021318846.1_2647_star	12	0.444444	1.92357e-18
XM_020838222.2	copper-transporting ATPase HMA5-like	XR_003700291.1	pab-miR396a-5p	12	0.444444	1.92357e-18
XM_020838222.2	copper-transporting ATPase HMA5-like	XR_003700291.1	vca-miR396-5p	12	0.444444	1.92357e-18
XM_020838222.2	copper-transporting ATPase HMA5-like	XR_003701085.1	aau-miR396	12	0.923077	1.92357e-18
XM_020838222.2	copper-transporting ATPase HMA5-like	XR_003701085.1	aof-miR396a	12	0.923077	1.92357e-18
XM_020838222.2	copper-transporting ATPase HMA5-like	XR_003701085.1	gma-miR396e	12	0.923077	1.92357e-18
XM_020838222.2	copper-transporting ATPase HMA5-like	XR_003701085.1	gma-miR396h	12	0.923077	1.92357e-18
XM_020838222.2	copper-transporting ATPase HMA5-like	XR_003701085.1	mdm-miR396a	12	0.923077	1.92357e-18
XM_020838222.2	copper-transporting ATPase HMA5-like	XR_003701085.1	NW_021318846.1_2647_star	12	0.923077	1.92357e-18
XM_020838222.2	copper-transporting ATPase HMA5-like	XR_003701085.1	pab-miR396a-5p	12	0.923077	1.92357e-18
XM_020838222.2	copper-transporting ATPase HMA5-like	XR_003701085.1	vca-miR396-5p	12	0.923077	1.92357e-18
XM_020838222.2	copper-transporting ATPase HMA5-like	XR_003701912.1	aau-miR396	12	0.705882	1.92357e-18
XM_020838222.2	copper-transporting ATPase HMA5-like	XR_003701912.1	aof-miR396a	12	0.705882	1.92357e-18
XM_020838222.2	copper-transporting ATPase HMA5-like	XR_003701912.1	gma-miR396e	12	0.705882	1.92357e-18
XM_020838222.2	copper-transporting ATPase HMA5-like	XR_003701912.1	gma-miR396h	12	0.705882	1.92357e-18
XM_020838222.2	copper-transporting ATPase HMA5-like	XR_003701912.1	mdm-miR396a	12	0.705882	1.92357e-18
XM_020838222.2	copper-transporting ATPase HMA5-like	XR_003701912.1	NW_021318846.1_2647_star	12	0.705882	1.92357e-18
XM_020838222.2	copper-transporting ATPase HMA5-like	XR_003701912.1	pab-miR396a-5p	12	0.705882	1.92357e-18
XM_020838222.2	copper-transporting ATPase HMA5-like	XR_003701912.1	vca-miR396-5p	12	0.705882	1.92357e-18
XM_020838382.2	receptor-like serine/threonine-protein kinase ALE2, transcript variant X1	TCONS_00033747	ahy-miR156b-5p	16	1	6.11862e-15
XM_020838382.2	receptor-like serine/threonine-protein kinase ALE2, transcript variant X1	TCONS_00033747	aly-miR157d-5p	16	1	6.11862e-15
XM_020838382.2	receptor-like serine/threonine-protein kinase ALE2, transcript variant X1	TCONS_00033747	bcy-miR156	16	1	6.11862e-15
XM_020838382.2	receptor-like serine/threonine-protein kinase ALE2, transcript variant X1	TCONS_00033747	gma-miR156e	16	1	6.11862e-15
XM_020838382.2	receptor-like serine/threonine-protein kinase ALE2, transcript variant X1	TCONS_00033747	gma-miR156r	16	1	6.11862e-15
XM_020839413.2	probable leucine-rich repeat receptor-like protein kinase At5g49770, transcript variant X2	XR_003701426.1	aau-miR319	17	0.607143	4.92575e-19
XM_020839413.2	probable leucine-rich repeat receptor-like protein kinase At5g49770, transcript variant X2	XR_003701426.1	aly-miR159c-3p	17	0.607143	4.92575e-19
XM_020839413.2	probable leucine-rich repeat receptor-like protein kinase At5g49770, transcript variant X2	XR_003701426.1	aly-miR319c-3p	17	0.607143	4.92575e-19
XM_020839413.2	probable leucine-rich repeat receptor-like protein kinase At5g49770, transcript variant X2	XR_003701426.1	atr-miR319a	17	0.607143	4.92575e-19
XM_020839413.2	probable leucine-rich repeat receptor-like protein kinase At5g49770, transcript variant X2	XR_003701426.1	cme-miR319c	17	0.607143	4.92575e-19
XM_020839413.2	probable leucine-rich repeat receptor-like protein kinase At5g49770, transcript variant X2	XR_003701426.1	cpa-miR319	17	0.607143	4.92575e-19
XM_020839413.2	probable leucine-rich repeat receptor-like protein kinase At5g49770, transcript variant X2	XR_003701426.1	gma-miR319g	17	0.607143	4.92575e-19
XM_020839413.2	probable leucine-rich repeat receptor-like protein kinase At5g49770, transcript variant X2	XR_003701426.1	gma-miR319p	17	0.607143	4.92575e-19
XM_020839413.2	probable leucine-rich repeat receptor-like protein kinase At5g49770, transcript variant X2	XR_003701426.1	mes-miR319h	17	0.607143	4.92575e-19
XM_020839413.2	probable leucine-rich repeat receptor-like protein kinase At5g49770, transcript variant X2	XR_003701426.1	mtr-miR319c-3p	17	0.607143	4.92575e-19
XM_020839413.2	probable leucine-rich repeat receptor-like protein kinase At5g49770, transcript variant X2	XR_003701426.1	ppt-miR319a	17	0.607143	4.92575e-19
XM_020839422.2	NAC domain-containing protein 87	XR_003701328.1	aly-miR169a-5p	20	0.298507	3.69353e-24
XM_020839865.2	bidirectional sugar transporter SWEET16-like, transcript variant X1	XR_002303219.2	aly-miR156a-5p	10	0.263158	4.07819e-11
XM_020839865.2	bidirectional sugar transporter SWEET16-like, transcript variant X1	XR_002303219.2	aly-miR157d-5p	10	0.263158	4.07819e-11
XM_020839865.2	bidirectional sugar transporter SWEET16-like, transcript variant X1	XR_002303219.2	bna-miR156a	10	0.263158	4.07819e-11
XM_020839865.2	bidirectional sugar transporter SWEET16-like, transcript variant X1	XR_002303219.2	gma-miR156q	10	0.263158	4.07819e-11
XM_020839865.2	bidirectional sugar transporter SWEET16-like, transcript variant X1	XR_002303219.2	han-miR3630-3p	10	0.263158	4.07819e-11
XM_020839865.2	bidirectional sugar transporter SWEET16-like, transcript variant X1	XR_002303219.2	sbi-miR156e	10	0.263158	4.07819e-11
XM_020839865.2	bidirectional sugar transporter SWEET16-like, transcript variant X1	XR_003701652.1	ahy-miR156b-5p	10	0.526316	4.07819e-11
XM_020839865.2	bidirectional sugar transporter SWEET16-like, transcript variant X1	XR_003701652.1	aly-miR156a-5p	10	0.526316	4.07819e-11
XM_020839865.2	bidirectional sugar transporter SWEET16-like, transcript variant X1	XR_003701652.1	aly-miR157d-5p	10	0.526316	4.07819e-11
XM_020839865.2	bidirectional sugar transporter SWEET16-like, transcript variant X1	XR_003701652.1	bna-miR156a	10	0.526316	4.07819e-11
XM_020839865.2	bidirectional sugar transporter SWEET16-like, transcript variant X1	XR_003701652.1	gma-miR156e	10	0.526316	4.07819e-11
XM_020839865.2	bidirectional sugar transporter SWEET16-like, transcript variant X1	XR_003701652.1	gma-miR156q	10	0.526316	4.07819e-11
XM_020839865.2	bidirectional sugar transporter SWEET16-like, transcript variant X1	XR_003701652.1	gma-miR156r	10	0.526316	4.07819e-11
XM_020840878.2	exosome complex component RRP41 homolog	TCONS_00025990	aly-miR395d-3p	11	0.916667	3.67849e-17
XM_020840878.2	exosome complex component RRP41 homolog	TCONS_00025990	aof-miR395a	11	0.916667	3.67849e-17
XM_020840878.2	exosome complex component RRP41 homolog	TCONS_00025990	ata-miR395e-3p	11	0.916667	3.67849e-17
XM_020840878.2	exosome complex component RRP41 homolog	TCONS_00025990	cme-miR395b	11	0.916667	3.67849e-17
XM_020840878.2	exosome complex component RRP41 homolog	TCONS_00025990	eun-miR395-3p	11	0.916667	3.67849e-17
XM_020840878.2	exosome complex component RRP41 homolog	TCONS_00025990	osa-miR395b	11	0.916667	3.67849e-17
XM_020840878.2	exosome complex component RRP41 homolog	TCONS_00025990	sly-miR395a	11	0.916667	3.67849e-17
XM_020840878.2	exosome complex component RRP41 homolog	XR_003701379.1	aly-miR395d-3p	11	0.785714	3.67849e-17
XM_020840878.2	exosome complex component RRP41 homolog	XR_003701379.1	cme-miR395b	11	0.785714	3.67849e-17
XM_020840878.2	exosome complex component RRP41 homolog	XR_003701379.1	eun-miR395-3p	11	0.785714	3.67849e-17
XM_020840878.2	exosome complex component RRP41 homolog	XR_003701379.1	osa-miR395b	11	0.785714	3.67849e-17
XM_020840878.2	exosome complex component RRP41 homolog	XR_003701379.1	sly-miR395a	11	0.785714	3.67849e-17
XM_020840878.2	exosome complex component RRP41 homolog	XR_003701381.1	aly-miR395d-3p	11	0.785714	3.67849e-17
XM_020840878.2	exosome complex component RRP41 homolog	XR_003701381.1	cme-miR395b	11	0.785714	3.67849e-17
XM_020840878.2	exosome complex component RRP41 homolog	XR_003701381.1	eun-miR395-3p	11	0.785714	3.67849e-17
XM_020840878.2	exosome complex component RRP41 homolog	XR_003701381.1	osa-miR395b	11	0.785714	3.67849e-17
XM_020840878.2	exosome complex component RRP41 homolog	XR_003701381.1	sly-miR395a	11	0.785714	3.67849e-17
XM_020840878.2	exosome complex component RRP41 homolog	TCONS_00024832	aly-miR395d-3p	10	0.833333	7.37801e-15
XM_020840878.2	exosome complex component RRP41 homolog	TCONS_00024832	ata-miR395e-3p	10	0.833333	7.37801e-15
XM_020840878.2	exosome complex component RRP41 homolog	TCONS_00024832	cme-miR395b	10	0.833333	7.37801e-15
XM_020840878.2	exosome complex component RRP41 homolog	TCONS_00024832	eun-miR395-3p	10	0.833333	7.37801e-15
XM_020840878.2	exosome complex component RRP41 homolog	TCONS_00024832	sly-miR395a	10	0.833333	7.37801e-15
XM_020841238.2	zinc-finger homeodomain protein 4-like	XR_003701426.1	aau-miR319	23	0.821429	2.43663e-15
XM_020841238.2	zinc-finger homeodomain protein 4-like	XR_003701426.1	aly-miR159c-3p	23	0.821429	2.43663e-15
XM_020841238.2	zinc-finger homeodomain protein 4-like	XR_003701426.1	aly-miR319c-3p	23	0.821429	2.43663e-15
XM_020841238.2	zinc-finger homeodomain protein 4-like	XR_003701426.1	atr-miR319a	23	0.821429	2.43663e-15
XM_020841238.2	zinc-finger homeodomain protein 4-like	XR_003701426.1	bdi-miR319b-3p	23	0.821429	2.43663e-15
XM_020841238.2	zinc-finger homeodomain protein 4-like	XR_003701426.1	cme-miR319c	23	0.821429	2.43663e-15
XM_020841238.2	zinc-finger homeodomain protein 4-like	XR_003701426.1	cpa-miR319	23	0.821429	2.43663e-15
XM_020841238.2	zinc-finger homeodomain protein 4-like	XR_003701426.1	csi-miR159c-3p	23	0.821429	2.43663e-15
XM_020841238.2	zinc-finger homeodomain protein 4-like	XR_003701426.1	gma-miR319g	23	0.821429	2.43663e-15
XM_020841238.2	zinc-finger homeodomain protein 4-like	XR_003701426.1	gma-miR319p	23	0.821429	2.43663e-15
XM_020841238.2	zinc-finger homeodomain protein 4-like	XR_003701426.1	mes-miR319h	23	0.821429	2.43663e-15
XM_020841238.2	zinc-finger homeodomain protein 4-like	XR_003701426.1	mtr-miR319c-3p	23	0.821429	2.43663e-15
XM_020841238.2	zinc-finger homeodomain protein 4-like	XR_003701426.1	ppt-miR319a	23	0.821429	2.43663e-15
XM_020841238.2	zinc-finger homeodomain protein 4-like	XR_003701426.1	pta-miR319	23	0.821429	2.43663e-15
XM_020841238.2	zinc-finger homeodomain protein 4-like	XR_002305298.2	bdi-miR159a-3p	17	1	1.38329e-08
XM_020841238.2	zinc-finger homeodomain protein 4-like	XR_002305298.2	bdi-miR319b-3p	17	1	1.38329e-08
XM_020841238.2	zinc-finger homeodomain protein 4-like	XR_002305298.2	cpa-miR159b	17	1	1.38329e-08
XM_020841238.2	zinc-finger homeodomain protein 4-like	XR_002305298.2	csi-miR159c-3p	17	1	1.38329e-08
XM_020841238.2	zinc-finger homeodomain protein 4-like	XR_002305298.2	gma-miR319p	17	1	1.38329e-08
XM_020841238.2	zinc-finger homeodomain protein 4-like	XR_002305298.2	mes-miR319h	17	1	1.38329e-08
XM_020841238.2	zinc-finger homeodomain protein 4-like	XR_002305298.2	NW_021320138.1_11162	17	1	1.38329e-08
XM_020841238.2	zinc-finger homeodomain protein 4-like	XR_002305298.2	osa-miR159f	17	1	1.38329e-08
XM_020841238.2	zinc-finger homeodomain protein 4-like	XR_002305298.2	ppt-miR319a	17	1	1.38329e-08
XM_020841238.2	zinc-finger homeodomain protein 4-like	XR_002305298.2	pta-miR159c	17	1	1.38329e-08
XM_020841238.2	zinc-finger homeodomain protein 4-like	XR_002305298.2	ptc-miR159d	17	1	1.38329e-08
XM_020841238.2	zinc-finger homeodomain protein 4-like	TCONS_00032841	aly-miR159c-3p	16	0.592593	1.17768e-07
XM_020841238.2	zinc-finger homeodomain protein 4-like	TCONS_00032841	bdi-miR159a-3p	16	0.592593	1.17768e-07
XM_020841238.2	zinc-finger homeodomain protein 4-like	TCONS_00032841	cme-miR159b	16	0.592593	1.17768e-07
XM_020841238.2	zinc-finger homeodomain protein 4-like	TCONS_00032841	cpa-miR159b	16	0.592593	1.17768e-07
XM_020841238.2	zinc-finger homeodomain protein 4-like	TCONS_00032841	fve-miR159c	16	0.592593	1.17768e-07
XM_020841238.2	zinc-finger homeodomain protein 4-like	TCONS_00032841	osa-miR159d	16	0.592593	1.17768e-07
XM_020841238.2	zinc-finger homeodomain protein 4-like	TCONS_00032841	osa-miR159f	16	0.592593	1.17768e-07
XM_020841238.2	zinc-finger homeodomain protein 4-like	TCONS_00032841	pta-miR159a	16	0.592593	1.17768e-07
XM_020841238.2	zinc-finger homeodomain protein 4-like	TCONS_00032841	pta-miR159c	16	0.592593	1.17768e-07
XM_020841238.2	zinc-finger homeodomain protein 4-like	TCONS_00032841	ptc-miR159d	16	0.592593	1.17768e-07
XM_020841238.2	zinc-finger homeodomain protein 4-like	TCONS_00032842	aly-miR159c-3p	16	0.516129	1.17768e-07
XM_020841238.2	zinc-finger homeodomain protein 4-like	TCONS_00032842	bdi-miR159a-3p	16	0.516129	1.17768e-07
XM_020841238.2	zinc-finger homeodomain protein 4-like	TCONS_00032842	cme-miR159b	16	0.516129	1.17768e-07
XM_020841238.2	zinc-finger homeodomain protein 4-like	TCONS_00032842	cpa-miR159b	16	0.516129	1.17768e-07
XM_020841238.2	zinc-finger homeodomain protein 4-like	TCONS_00032842	fve-miR159c	16	0.516129	1.17768e-07
XM_020841238.2	zinc-finger homeodomain protein 4-like	TCONS_00032842	osa-miR159d	16	0.516129	1.17768e-07
XM_020841238.2	zinc-finger homeodomain protein 4-like	TCONS_00032842	osa-miR159f	16	0.516129	1.17768e-07
XM_020841238.2	zinc-finger homeodomain protein 4-like	TCONS_00032842	pta-miR159a	16	0.516129	1.17768e-07
XM_020841238.2	zinc-finger homeodomain protein 4-like	TCONS_00032842	pta-miR159c	16	0.516129	1.17768e-07
XM_020841238.2	zinc-finger homeodomain protein 4-like	TCONS_00032842	ptc-miR159d	16	0.516129	1.17768e-07
XM_020841238.2	zinc-finger homeodomain protein 4-like	TCONS_00017086	cme-miR159b	15	0.882353	8.82512e-07
XM_020841238.2	zinc-finger homeodomain protein 4-like	TCONS_00017086	cpa-miR159b	15	0.882353	8.82512e-07
XM_020841238.2	zinc-finger homeodomain protein 4-like	TCONS_00017086	fve-miR159c	15	0.882353	8.82512e-07
XM_020841238.2	zinc-finger homeodomain protein 4-like	TCONS_00017086	osa-miR159c	15	0.882353	8.82512e-07
XM_020841238.2	zinc-finger homeodomain protein 4-like	TCONS_00017086	osa-miR159d	15	0.882353	8.82512e-07
XM_020841238.2	zinc-finger homeodomain protein 4-like	TCONS_00017086	pta-miR159c	15	0.882353	8.82512e-07
XM_020841238.2	zinc-finger homeodomain protein 4-like	TCONS_00017086	ptc-miR159d	15	0.882353	8.82512e-07
XM_020841238.2	zinc-finger homeodomain protein 4-like	TCONS_00031314	aly-miR159c-3p	15	0.789474	8.82512e-07
XM_020841238.2	zinc-finger homeodomain protein 4-like	TCONS_00031314	bdi-miR319b-3p	15	0.789474	8.82512e-07
XM_020841238.2	zinc-finger homeodomain protein 4-like	TCONS_00031314	gma-miR319p	15	0.789474	8.82512e-07
XM_020841238.2	zinc-finger homeodomain protein 4-like	TCONS_00031314	ptc-miR319i	15	0.789474	8.82512e-07
XM_020841238.2	zinc-finger homeodomain protein 4-like	TCONS_00005590	aly-miR159c-3p	11	1	0.000762799
XM_020841273.2	uncharacterized LOC110110005, transcript variant X2	XR_003701426.1	aau-miR319	10	0.357143	5.78207e-14
XM_020841273.2	uncharacterized LOC110110005, transcript variant X2	XR_003701426.1	atr-miR319a	10	0.357143	5.78207e-14
XM_020841273.2	uncharacterized LOC110110005, transcript variant X2	XR_003701426.1	bdi-miR319b-3p	10	0.357143	5.78207e-14
XM_020841273.2	uncharacterized LOC110110005, transcript variant X2	XR_003701426.1	cme-miR319c	10	0.357143	5.78207e-14
XM_020841273.2	uncharacterized LOC110110005, transcript variant X2	XR_003701426.1	cpa-miR319	10	0.357143	5.78207e-14
XM_020841273.2	uncharacterized LOC110110005, transcript variant X2	XR_003701426.1	mtr-miR319c-3p	10	0.357143	5.78207e-14
XM_020841350.2	ubiquitin-like-specific protease 1D, transcript variant X1	XR_003701085.1	aau-miR396	13	1	2.6078e-24
XM_020841350.2	ubiquitin-like-specific protease 1D, transcript variant X1	XR_003701085.1	aof-miR396a	13	1	2.6078e-24
XM_020841350.2	ubiquitin-like-specific protease 1D, transcript variant X1	XR_003701085.1	gma-miR396e	13	1	2.6078e-24
XM_020841350.2	ubiquitin-like-specific protease 1D, transcript variant X1	XR_003701085.1	gma-miR396h	13	1	2.6078e-24
XM_020841350.2	ubiquitin-like-specific protease 1D, transcript variant X1	XR_003701085.1	mdm-miR396a	13	1	2.6078e-24
XM_020841350.2	ubiquitin-like-specific protease 1D, transcript variant X1	XR_003701085.1	NW_021318846.1_2647_star	13	1	2.6078e-24
XM_020841350.2	ubiquitin-like-specific protease 1D, transcript variant X1	XR_003701085.1	pab-miR396a-5p	13	1	2.6078e-24
XM_020841350.2	ubiquitin-like-specific protease 1D, transcript variant X1	XR_003701085.1	vca-miR396-5p	13	1	2.6078e-24
XM_020841350.2	ubiquitin-like-specific protease 1D, transcript variant X1	TCONS_00010760	aau-miR396	12	1	3.84459e-21
XM_020841350.2	ubiquitin-like-specific protease 1D, transcript variant X1	TCONS_00010760	gma-miR396e	12	1	3.84459e-21
XM_020841350.2	ubiquitin-like-specific protease 1D, transcript variant X1	TCONS_00010760	gma-miR396h	12	1	3.84459e-21
XM_020841350.2	ubiquitin-like-specific protease 1D, transcript variant X1	TCONS_00010760	mdm-miR396a	12	1	3.84459e-21
XM_020841350.2	ubiquitin-like-specific protease 1D, transcript variant X1	TCONS_00010760	NW_021318846.1_2647_star	12	1	3.84459e-21
XM_020841350.2	ubiquitin-like-specific protease 1D, transcript variant X1	TCONS_00010760	pab-miR396a-5p	12	1	3.84459e-21
XM_020841350.2	ubiquitin-like-specific protease 1D, transcript variant X1	TCONS_00010760	vca-miR396-5p	12	1	3.84459e-21
XM_020841350.2	ubiquitin-like-specific protease 1D, transcript variant X1	XR_003700291.1	aau-miR396	12	0.444444	3.84459e-21
XM_020841350.2	ubiquitin-like-specific protease 1D, transcript variant X1	XR_003700291.1	aof-miR396a	12	0.444444	3.84459e-21
XM_020841350.2	ubiquitin-like-specific protease 1D, transcript variant X1	XR_003700291.1	gma-miR396e	12	0.444444	3.84459e-21
XM_020841350.2	ubiquitin-like-specific protease 1D, transcript variant X1	XR_003700291.1	gma-miR396h	12	0.444444	3.84459e-21
XM_020841350.2	ubiquitin-like-specific protease 1D, transcript variant X1	XR_003700291.1	mdm-miR396a	12	0.444444	3.84459e-21
XM_020841350.2	ubiquitin-like-specific protease 1D, transcript variant X1	XR_003700291.1	NW_021318846.1_2647_star	12	0.444444	3.84459e-21
XM_020841350.2	ubiquitin-like-specific protease 1D, transcript variant X1	XR_003700291.1	pab-miR396a-5p	12	0.444444	3.84459e-21
XM_020841350.2	ubiquitin-like-specific protease 1D, transcript variant X1	XR_003700291.1	vca-miR396-5p	12	0.444444	3.84459e-21
XM_020841350.2	ubiquitin-like-specific protease 1D, transcript variant X1	XR_003701912.1	aau-miR396	12	0.705882	3.84459e-21
XM_020841350.2	ubiquitin-like-specific protease 1D, transcript variant X1	XR_003701912.1	aof-miR396a	12	0.705882	3.84459e-21
XM_020841350.2	ubiquitin-like-specific protease 1D, transcript variant X1	XR_003701912.1	gma-miR396e	12	0.705882	3.84459e-21
XM_020841350.2	ubiquitin-like-specific protease 1D, transcript variant X1	XR_003701912.1	gma-miR396h	12	0.705882	3.84459e-21
XM_020841350.2	ubiquitin-like-specific protease 1D, transcript variant X1	XR_003701912.1	mdm-miR396a	12	0.705882	3.84459e-21
XM_020841350.2	ubiquitin-like-specific protease 1D, transcript variant X1	XR_003701912.1	NW_021318846.1_2647_star	12	0.705882	3.84459e-21
XM_020841350.2	ubiquitin-like-specific protease 1D, transcript variant X1	XR_003701912.1	pab-miR396a-5p	12	0.705882	3.84459e-21
XM_020841350.2	ubiquitin-like-specific protease 1D, transcript variant X1	XR_003701912.1	vca-miR396-5p	12	0.705882	3.84459e-21
XM_020841352.2	ubiquitin-like-specific protease 1D, transcript variant X3	XR_003701085.1	aau-miR396	13	1	2.6078e-24
XM_020841352.2	ubiquitin-like-specific protease 1D, transcript variant X3	XR_003701085.1	aof-miR396a	13	1	2.6078e-24
XM_020841352.2	ubiquitin-like-specific protease 1D, transcript variant X3	XR_003701085.1	gma-miR396e	13	1	2.6078e-24
XM_020841352.2	ubiquitin-like-specific protease 1D, transcript variant X3	XR_003701085.1	gma-miR396h	13	1	2.6078e-24
XM_020841352.2	ubiquitin-like-specific protease 1D, transcript variant X3	XR_003701085.1	mdm-miR396a	13	1	2.6078e-24
XM_020841352.2	ubiquitin-like-specific protease 1D, transcript variant X3	XR_003701085.1	NW_021318846.1_2647_star	13	1	2.6078e-24
XM_020841352.2	ubiquitin-like-specific protease 1D, transcript variant X3	XR_003701085.1	pab-miR396a-5p	13	1	2.6078e-24
XM_020841352.2	ubiquitin-like-specific protease 1D, transcript variant X3	XR_003701085.1	vca-miR396-5p	13	1	2.6078e-24
XM_020841352.2	ubiquitin-like-specific protease 1D, transcript variant X3	TCONS_00010760	aau-miR396	12	1	3.84459e-21
XM_020841352.2	ubiquitin-like-specific protease 1D, transcript variant X3	TCONS_00010760	gma-miR396e	12	1	3.84459e-21
XM_020841352.2	ubiquitin-like-specific protease 1D, transcript variant X3	TCONS_00010760	gma-miR396h	12	1	3.84459e-21
XM_020841352.2	ubiquitin-like-specific protease 1D, transcript variant X3	TCONS_00010760	mdm-miR396a	12	1	3.84459e-21
XM_020841352.2	ubiquitin-like-specific protease 1D, transcript variant X3	TCONS_00010760	NW_021318846.1_2647_star	12	1	3.84459e-21
XM_020841352.2	ubiquitin-like-specific protease 1D, transcript variant X3	TCONS_00010760	pab-miR396a-5p	12	1	3.84459e-21
XM_020841352.2	ubiquitin-like-specific protease 1D, transcript variant X3	TCONS_00010760	vca-miR396-5p	12	1	3.84459e-21
XM_020841352.2	ubiquitin-like-specific protease 1D, transcript variant X3	XR_003700291.1	aau-miR396	12	0.444444	3.84459e-21
XM_020841352.2	ubiquitin-like-specific protease 1D, transcript variant X3	XR_003700291.1	aof-miR396a	12	0.444444	3.84459e-21
XM_020841352.2	ubiquitin-like-specific protease 1D, transcript variant X3	XR_003700291.1	gma-miR396e	12	0.444444	3.84459e-21
XM_020841352.2	ubiquitin-like-specific protease 1D, transcript variant X3	XR_003700291.1	gma-miR396h	12	0.444444	3.84459e-21
XM_020841352.2	ubiquitin-like-specific protease 1D, transcript variant X3	XR_003700291.1	mdm-miR396a	12	0.444444	3.84459e-21
XM_020841352.2	ubiquitin-like-specific protease 1D, transcript variant X3	XR_003700291.1	NW_021318846.1_2647_star	12	0.444444	3.84459e-21
XM_020841352.2	ubiquitin-like-specific protease 1D, transcript variant X3	XR_003700291.1	pab-miR396a-5p	12	0.444444	3.84459e-21
XM_020841352.2	ubiquitin-like-specific protease 1D, transcript variant X3	XR_003700291.1	vca-miR396-5p	12	0.444444	3.84459e-21
XM_020841352.2	ubiquitin-like-specific protease 1D, transcript variant X3	XR_003701912.1	aau-miR396	12	0.705882	3.84459e-21
XM_020841352.2	ubiquitin-like-specific protease 1D, transcript variant X3	XR_003701912.1	aof-miR396a	12	0.705882	3.84459e-21
XM_020841352.2	ubiquitin-like-specific protease 1D, transcript variant X3	XR_003701912.1	gma-miR396e	12	0.705882	3.84459e-21
XM_020841352.2	ubiquitin-like-specific protease 1D, transcript variant X3	XR_003701912.1	gma-miR396h	12	0.705882	3.84459e-21
XM_020841352.2	ubiquitin-like-specific protease 1D, transcript variant X3	XR_003701912.1	mdm-miR396a	12	0.705882	3.84459e-21
XM_020841352.2	ubiquitin-like-specific protease 1D, transcript variant X3	XR_003701912.1	NW_021318846.1_2647_star	12	0.705882	3.84459e-21
XM_020841352.2	ubiquitin-like-specific protease 1D, transcript variant X3	XR_003701912.1	pab-miR396a-5p	12	0.705882	3.84459e-21
XM_020841352.2	ubiquitin-like-specific protease 1D, transcript variant X3	XR_003701912.1	vca-miR396-5p	12	0.705882	3.84459e-21
XM_020841365.2	uncharacterized LOC110110061, transcript variant X2	XR_003701426.1	aly-miR159c-3p	12	0.428571	1.92357e-18
XM_020841365.2	uncharacterized LOC110110061, transcript variant X2	XR_003701426.1	aly-miR319c-3p	12	0.428571	1.92357e-18
XM_020841365.2	uncharacterized LOC110110061, transcript variant X2	XR_003701426.1	atr-miR319a	12	0.428571	1.92357e-18
XM_020841365.2	uncharacterized LOC110110061, transcript variant X2	XR_003701426.1	cme-miR319c	12	0.428571	1.92357e-18
XM_020841365.2	uncharacterized LOC110110061, transcript variant X2	XR_003701426.1	gma-miR319g	12	0.428571	1.92357e-18
XM_020841365.2	uncharacterized LOC110110061, transcript variant X2	XR_003701426.1	gma-miR319p	12	0.428571	1.92357e-18
XM_020841365.2	uncharacterized LOC110110061, transcript variant X2	XR_003701426.1	pta-miR319	12	0.428571	1.92357e-18
XM_020842094.2	subtilisin-like protease SBT1.8	XR_003701426.1	aau-miR319	14	0.5	2.20633e-10
XM_020842094.2	subtilisin-like protease SBT1.8	XR_003701426.1	aly-miR319c-3p	14	0.5	2.20633e-10
XM_020842094.2	subtilisin-like protease SBT1.8	XR_003701426.1	atr-miR319a	14	0.5	2.20633e-10
XM_020842094.2	subtilisin-like protease SBT1.8	XR_003701426.1	cme-miR319c	14	0.5	2.20633e-10
XM_020842094.2	subtilisin-like protease SBT1.8	XR_003701426.1	cpa-miR319	14	0.5	2.20633e-10
XM_020842094.2	subtilisin-like protease SBT1.8	XR_003701426.1	csi-miR159c-3p	14	0.5	2.20633e-10
XM_020842094.2	subtilisin-like protease SBT1.8	XR_003701426.1	gma-miR319g	14	0.5	2.20633e-10
XM_020842094.2	subtilisin-like protease SBT1.8	XR_003701426.1	gma-miR319p	14	0.5	2.20633e-10
XM_020842094.2	subtilisin-like protease SBT1.8	XR_003701426.1	mes-miR319h	14	0.5	2.20633e-10
XM_020842094.2	subtilisin-like protease SBT1.8	XR_003701426.1	mtr-miR319c-3p	14	0.5	2.20633e-10
XM_020842094.2	subtilisin-like protease SBT1.8	XR_003701426.1	ppt-miR319a	14	0.5	2.20633e-10
XM_020842094.2	subtilisin-like protease SBT1.8	XR_003701426.1	pta-miR319	14	0.5	2.20633e-10
XM_020842094.2	subtilisin-like protease SBT1.8	XR_002305298.2	cpa-miR159b	11	0.647059	5.87705e-07
XM_020842094.2	subtilisin-like protease SBT1.8	XR_002305298.2	csi-miR159c-3p	11	0.647059	5.87705e-07
XM_020842094.2	subtilisin-like protease SBT1.8	XR_002305298.2	gma-miR319p	11	0.647059	5.87705e-07
XM_020842094.2	subtilisin-like protease SBT1.8	XR_002305298.2	mes-miR319h	11	0.647059	5.87705e-07
XM_020842094.2	subtilisin-like protease SBT1.8	XR_002305298.2	NW_021320138.1_11162	11	0.647059	5.87705e-07
XM_020842094.2	subtilisin-like protease SBT1.8	XR_002305298.2	ppt-miR319a	11	0.647059	5.87705e-07
XM_020842094.2	subtilisin-like protease SBT1.8	XR_002305298.2	pta-miR159c	11	0.647059	5.87705e-07
XM_020842094.2	subtilisin-like protease SBT1.8	XR_002305298.2	ptc-miR159d	11	0.647059	5.87705e-07
XM_020842679.2	nuclear transcription factor Y subunit A-9, transcript variant X3	XR_003701328.1	aly-miR169a-5p	25	0.373134	2.71307e-37
XM_020842679.2	nuclear transcription factor Y subunit A-9, transcript variant X3	XR_003701328.1	gma-miR169c	25	0.373134	2.71307e-37
XM_020843393.2	patellin-6	XR_003701426.1	aau-miR319	15	0.535714	5.41983e-17
XM_020843393.2	patellin-6	XR_003701426.1	aly-miR319c-3p	15	0.535714	5.41983e-17
XM_020843393.2	patellin-6	XR_003701426.1	atr-miR319a	15	0.535714	5.41983e-17
XM_020843393.2	patellin-6	XR_003701426.1	cme-miR319c	15	0.535714	5.41983e-17
XM_020843393.2	patellin-6	XR_003701426.1	cpa-miR319	15	0.535714	5.41983e-17
XM_020843393.2	patellin-6	XR_003701426.1	csi-miR159c-3p	15	0.535714	5.41983e-17
XM_020843393.2	patellin-6	XR_003701426.1	gma-miR319g	15	0.535714	5.41983e-17
XM_020843393.2	patellin-6	XR_003701426.1	mes-miR319h	15	0.535714	5.41983e-17
XM_020843393.2	patellin-6	XR_003701426.1	mtr-miR319c-3p	15	0.535714	5.41983e-17
XM_020843393.2	patellin-6	XR_003701426.1	ppt-miR319a	15	0.535714	5.41983e-17
XM_020843393.2	patellin-6	XR_003701426.1	pta-miR319	15	0.535714	5.41983e-17
XM_020843688.1	cyclin-D2-1	XR_003701426.1	aau-miR319	13	0.464286	3.56679e-14
XM_020843688.1	cyclin-D2-1	XR_003701426.1	aly-miR319c-3p	13	0.464286	3.56679e-14
XM_020843688.1	cyclin-D2-1	XR_003701426.1	atr-miR319a	13	0.464286	3.56679e-14
XM_020843688.1	cyclin-D2-1	XR_003701426.1	bdi-miR319b-3p	13	0.464286	3.56679e-14
XM_020843688.1	cyclin-D2-1	XR_003701426.1	cme-miR319c	13	0.464286	3.56679e-14
XM_020843688.1	cyclin-D2-1	XR_003701426.1	csi-miR159c-3p	13	0.464286	3.56679e-14
XM_020843688.1	cyclin-D2-1	XR_003701426.1	gma-miR319g	13	0.464286	3.56679e-14
XM_020843688.1	cyclin-D2-1	XR_003701426.1	gma-miR319p	13	0.464286	3.56679e-14
XM_020843688.1	cyclin-D2-1	XR_003701426.1	mes-miR319h	13	0.464286	3.56679e-14
XM_020843688.1	cyclin-D2-1	XR_003701426.1	mtr-miR319c-3p	13	0.464286	3.56679e-14
XM_020843688.1	cyclin-D2-1	XR_003701426.1	ppt-miR319a	13	0.464286	3.56679e-14
XM_020843688.1	cyclin-D2-1	XR_003701426.1	pta-miR319	13	0.464286	3.56679e-14
XM_020843688.1	cyclin-D2-1	XR_002305298.2	bdi-miR159a-3p	11	0.647059	6.10371e-11
XM_020843688.1	cyclin-D2-1	XR_002305298.2	bdi-miR319b-3p	11	0.647059	6.10371e-11
XM_020843688.1	cyclin-D2-1	XR_002305298.2	cpa-miR159b	11	0.647059	6.10371e-11
XM_020843688.1	cyclin-D2-1	XR_002305298.2	csi-miR159c-3p	11	0.647059	6.10371e-11
XM_020843688.1	cyclin-D2-1	XR_002305298.2	gma-miR319p	11	0.647059	6.10371e-11
XM_020843688.1	cyclin-D2-1	XR_002305298.2	mes-miR319h	11	0.647059	6.10371e-11
XM_020843688.1	cyclin-D2-1	XR_002305298.2	osa-miR159f	11	0.647059	6.10371e-11
XM_020843688.1	cyclin-D2-1	XR_002305298.2	ppt-miR319a	11	0.647059	6.10371e-11
XM_020843688.1	cyclin-D2-1	XR_002305298.2	pta-miR159c	11	0.647059	6.10371e-11
XM_020843688.1	cyclin-D2-1	XR_002305298.2	ptc-miR159d	11	0.647059	6.10371e-11
XM_020843798.2	squamosa promoter-binding-like protein 3	XR_002303219.2	aly-miR156a-5p	18	0.473684	8.94224e-09
XM_020843798.2	squamosa promoter-binding-like protein 3	XR_002303219.2	aly-miR156g-5p	18	0.473684	8.94224e-09
XM_020843798.2	squamosa promoter-binding-like protein 3	XR_002303219.2	aly-miR157d-5p	18	0.473684	8.94224e-09
XM_020843798.2	squamosa promoter-binding-like protein 3	XR_002303219.2	bna-miR156a	18	0.473684	8.94224e-09
XM_020843798.2	squamosa promoter-binding-like protein 3	XR_002303219.2	cca-miR156b	18	0.473684	8.94224e-09
XM_020843798.2	squamosa promoter-binding-like protein 3	XR_002303219.2	gma-miR156q	18	0.473684	8.94224e-09
XM_020843798.2	squamosa promoter-binding-like protein 3	XR_002303219.2	hci-miR156a	18	0.473684	8.94224e-09
XM_020843798.2	squamosa promoter-binding-like protein 3	XR_002303219.2	pab-miR156b	18	0.473684	8.94224e-09
XM_020843798.2	squamosa promoter-binding-like protein 3	XR_002303219.2	sbi-miR156e	18	0.473684	8.94224e-09
XM_020843798.2	squamosa promoter-binding-like protein 3	XR_003701652.1	ahy-miR156b-5p	18	0.947368	8.94224e-09
XM_020843798.2	squamosa promoter-binding-like protein 3	XR_003701652.1	aly-miR156a-5p	18	0.947368	8.94224e-09
XM_020843798.2	squamosa promoter-binding-like protein 3	XR_003701652.1	aly-miR157d-5p	18	0.947368	8.94224e-09
XM_020843798.2	squamosa promoter-binding-like protein 3	XR_003701652.1	bna-miR156a	18	0.947368	8.94224e-09
XM_020843798.2	squamosa promoter-binding-like protein 3	XR_003701652.1	cca-miR156b	18	0.947368	8.94224e-09
XM_020843798.2	squamosa promoter-binding-like protein 3	XR_003701652.1	gma-miR156e	18	0.947368	8.94224e-09
XM_020843798.2	squamosa promoter-binding-like protein 3	XR_003701652.1	gma-miR156q	18	0.947368	8.94224e-09
XM_020843798.2	squamosa promoter-binding-like protein 3	XR_003701652.1	gma-miR156r	18	0.947368	8.94224e-09
XM_020843798.2	squamosa promoter-binding-like protein 3	XR_003701652.1	mtr-miR156j	18	0.947368	8.94224e-09
XM_020843798.2	squamosa promoter-binding-like protein 3	XR_003701652.1	pab-miR156b	18	0.947368	8.94224e-09
XM_020843798.2	squamosa promoter-binding-like protein 3	TCONS_00033747	ahy-miR156b-5p	16	1	5.46057e-07
XM_020843798.2	squamosa promoter-binding-like protein 3	TCONS_00033747	aly-miR157d-5p	16	1	5.46057e-07
XM_020843798.2	squamosa promoter-binding-like protein 3	TCONS_00033747	bcy-miR156	16	1	5.46057e-07
XM_020843798.2	squamosa promoter-binding-like protein 3	TCONS_00033747	gma-miR156e	16	1	5.46057e-07
XM_020843798.2	squamosa promoter-binding-like protein 3	TCONS_00033747	gma-miR156r	16	1	5.46057e-07
XM_020843798.2	squamosa promoter-binding-like protein 3	XR_003702334.1	aly-miR156a-5p	15	0.789474	3.55048e-06
XM_020843798.2	squamosa promoter-binding-like protein 3	XR_003702334.1	aly-miR156g-5p	15	0.789474	3.55048e-06
XM_020843798.2	squamosa promoter-binding-like protein 3	XR_003702334.1	aly-miR157d-5p	15	0.789474	3.55048e-06
XM_020843798.2	squamosa promoter-binding-like protein 3	XR_003702334.1	bna-miR156a	15	0.789474	3.55048e-06
XM_020843798.2	squamosa promoter-binding-like protein 3	XR_003702334.1	cca-miR156b	15	0.789474	3.55048e-06
XM_020843798.2	squamosa promoter-binding-like protein 3	XR_003702334.1	gma-miR156q	15	0.789474	3.55048e-06
XM_020843798.2	squamosa promoter-binding-like protein 3	XR_003702334.1	pab-miR156b	15	0.789474	3.55048e-06
XM_020843798.2	squamosa promoter-binding-like protein 3	TCONS_00032842	aly-miR156a-5p	13	0.419355	0.000103507
XM_020843798.2	squamosa promoter-binding-like protein 3	TCONS_00032842	bdi-miR529-5p	13	0.419355	0.000103507
XM_020843798.2	squamosa promoter-binding-like protein 3	TCONS_00032842	bna-miR156a	13	0.419355	0.000103507
XM_020843798.2	squamosa promoter-binding-like protein 3	TCONS_00032842	cca-miR156b	13	0.419355	0.000103507
XM_020843798.2	squamosa promoter-binding-like protein 3	TCONS_00032842	gma-miR156q	13	0.419355	0.000103507
XM_020843798.2	squamosa promoter-binding-like protein 3	TCONS_00032842	ppt-miR529e	13	0.419355	0.000103507
XM_020843798.2	squamosa promoter-binding-like protein 3	TCONS_00032842	sbi-miR156e	13	0.419355	0.000103507
XM_020843798.2	squamosa promoter-binding-like protein 3	TCONS_00032842	sly-miR156e-5p	13	0.419355	0.000103507
XM_020843798.2	squamosa promoter-binding-like protein 3	XR_003702767.1	aly-miR156a-5p	11	0.305556	0.00182024
XM_020843798.2	squamosa promoter-binding-like protein 3	XR_003702767.1	bdi-miR529-5p	11	0.305556	0.00182024
XM_020843798.2	squamosa promoter-binding-like protein 3	XR_003702767.1	bna-miR156a	11	0.305556	0.00182024
XM_020843798.2	squamosa promoter-binding-like protein 3	XR_003702767.1	cca-miR156b	11	0.305556	0.00182024
XM_020843798.2	squamosa promoter-binding-like protein 3	XR_003702767.1	gma-miR156q	11	0.305556	0.00182024
XM_020843798.2	squamosa promoter-binding-like protein 3	XR_003702767.1	ppt-miR529e	11	0.305556	0.00182024
XM_020843798.2	squamosa promoter-binding-like protein 3	XR_003702767.1	sly-miR156e-5p	11	0.305556	0.00182024
XM_020843798.2	squamosa promoter-binding-like protein 3	TCONS_00032841	aly-miR156a-5p	10	0.37037	0.00628216
XM_020843798.2	squamosa promoter-binding-like protein 3	TCONS_00032841	bna-miR156a	10	0.37037	0.00628216
XM_020843798.2	squamosa promoter-binding-like protein 3	TCONS_00032841	cca-miR156b	10	0.37037	0.00628216
XM_020843798.2	squamosa promoter-binding-like protein 3	TCONS_00032841	gma-miR156q	10	0.37037	0.00628216
XM_020843798.2	squamosa promoter-binding-like protein 3	TCONS_00032841	sly-miR156e-5p	10	0.37037	0.00628216
XM_020843798.2	squamosa promoter-binding-like protein 3	TCONS_00036429	bdi-miR529-5p	10	0.714286	0.00628216
XM_020843798.2	squamosa promoter-binding-like protein 3	TCONS_00036429	ppt-miR529e	10	0.714286	0.00628216
XM_020843798.2	squamosa promoter-binding-like protein 3	TCONS_00036429	sly-miR156e-5p	10	0.714286	0.00628216
XM_020843798.2	squamosa promoter-binding-like protein 3	XR_003700116.1	ahy-miR156b-5p	10	0.4	0.00628216
XM_020843798.2	squamosa promoter-binding-like protein 3	XR_003700116.1	aly-miR157d-5p	10	0.4	0.00628216
XM_020844198.2	protein PIN-LIKES 3, transcript variant X1	XR_003702199.1	aly-miR167a-5p	14	0.368421	8.96573e-14
XM_020844198.2	protein PIN-LIKES 3, transcript variant X1	XR_003702199.1	bna-miR167a	14	0.368421	8.96573e-14
XM_020844198.2	protein PIN-LIKES 3, transcript variant X1	XR_003702200.1	aly-miR167a-5p	14	0.388889	8.96573e-14
XM_020844198.2	protein PIN-LIKES 3, transcript variant X1	XR_003702200.1	bna-miR167a	14	0.388889	8.96573e-14
XM_020844198.2	protein PIN-LIKES 3, transcript variant X1	TCONS_00026869	aly-miR167a-5p	13	0.866667	3.18574e-12
XM_020844198.2	protein PIN-LIKES 3, transcript variant X1	TCONS_00026869	bna-miR167a	13	0.866667	3.18574e-12
XM_020844198.2	protein PIN-LIKES 3, transcript variant X1	TCONS_00018697	aly-miR167a-5p	11	0.916667	2.09976e-09
XM_020844198.2	protein PIN-LIKES 3, transcript variant X1	TCONS_00018697	bna-miR167a	11	0.916667	2.09976e-09
XM_020844477.2	cytochrome b561 domain-containing protein At2g30890, transcript variant X1	XR_002303219.2	aly-miR156a-5p	16	0.421053	1.21824e-15
XM_020844477.2	cytochrome b561 domain-containing protein At2g30890, transcript variant X1	XR_002303219.2	aly-miR156g-5p	16	0.421053	1.21824e-15
XM_020844477.2	cytochrome b561 domain-containing protein At2g30890, transcript variant X1	XR_002303219.2	bna-miR156a	16	0.421053	1.21824e-15
XM_020844477.2	cytochrome b561 domain-containing protein At2g30890, transcript variant X1	XR_002303219.2	cca-miR156b	16	0.421053	1.21824e-15
XM_020844477.2	cytochrome b561 domain-containing protein At2g30890, transcript variant X1	XR_002303219.2	gma-miR156q	16	0.421053	1.21824e-15
XM_020844477.2	cytochrome b561 domain-containing protein At2g30890, transcript variant X1	XR_002303219.2	pab-miR156b	16	0.421053	1.21824e-15
XM_020844477.2	cytochrome b561 domain-containing protein At2g30890, transcript variant X1	XR_002303219.2	sbi-miR156e	16	0.421053	1.21824e-15
XM_020844477.2	cytochrome b561 domain-containing protein At2g30890, transcript variant X1	XR_003702334.1	aly-miR156a-5p	14	0.736842	1.58214e-12
XM_020844477.2	cytochrome b561 domain-containing protein At2g30890, transcript variant X1	XR_003702334.1	aly-miR156g-5p	14	0.736842	1.58214e-12
XM_020844477.2	cytochrome b561 domain-containing protein At2g30890, transcript variant X1	XR_003702334.1	bna-miR156a	14	0.736842	1.58214e-12
XM_020844477.2	cytochrome b561 domain-containing protein At2g30890, transcript variant X1	XR_003702334.1	cca-miR156b	14	0.736842	1.58214e-12
XM_020844477.2	cytochrome b561 domain-containing protein At2g30890, transcript variant X1	XR_003702334.1	gma-miR156q	14	0.736842	1.58214e-12
XM_020844477.2	cytochrome b561 domain-containing protein At2g30890, transcript variant X1	XR_003702334.1	pab-miR156b	14	0.736842	1.58214e-12
XM_020844477.2	cytochrome b561 domain-containing protein At2g30890, transcript variant X1	XR_003701652.1	aly-miR156a-5p	11	0.578947	1.61713e-08
XM_020844477.2	cytochrome b561 domain-containing protein At2g30890, transcript variant X1	XR_003701652.1	bna-miR156a	11	0.578947	1.61713e-08
XM_020844477.2	cytochrome b561 domain-containing protein At2g30890, transcript variant X1	XR_003701652.1	cca-miR156b	11	0.578947	1.61713e-08
XM_020844477.2	cytochrome b561 domain-containing protein At2g30890, transcript variant X1	XR_003701652.1	gma-miR156q	11	0.578947	1.61713e-08
XM_020844477.2	cytochrome b561 domain-containing protein At2g30890, transcript variant X1	XR_003701652.1	mtr-miR156j	11	0.578947	1.61713e-08
XM_020844477.2	cytochrome b561 domain-containing protein At2g30890, transcript variant X1	XR_003701652.1	pab-miR156b	11	0.578947	1.61713e-08
XM_020844477.2	cytochrome b561 domain-containing protein At2g30890, transcript variant X1	TCONS_00032841	aly-miR156a-5p	10	0.37037	2.37214e-07
XM_020844477.2	cytochrome b561 domain-containing protein At2g30890, transcript variant X1	TCONS_00032841	bna-miR156a	10	0.37037	2.37214e-07
XM_020844477.2	cytochrome b561 domain-containing protein At2g30890, transcript variant X1	TCONS_00032841	cca-miR156b	10	0.37037	2.37214e-07
XM_020844477.2	cytochrome b561 domain-containing protein At2g30890, transcript variant X1	TCONS_00032841	gma-miR156q	10	0.37037	2.37214e-07
XM_020844477.2	cytochrome b561 domain-containing protein At2g30890, transcript variant X1	TCONS_00032841	sly-miR156e-5p	10	0.37037	2.37214e-07
XM_020844477.2	cytochrome b561 domain-containing protein At2g30890, transcript variant X1	TCONS_00032842	aly-miR156a-5p	10	0.322581	2.37214e-07
XM_020844477.2	cytochrome b561 domain-containing protein At2g30890, transcript variant X1	TCONS_00032842	bna-miR156a	10	0.322581	2.37214e-07
XM_020844477.2	cytochrome b561 domain-containing protein At2g30890, transcript variant X1	TCONS_00032842	cca-miR156b	10	0.322581	2.37214e-07
XM_020844477.2	cytochrome b561 domain-containing protein At2g30890, transcript variant X1	TCONS_00032842	gma-miR156q	10	0.322581	2.37214e-07
XM_020844477.2	cytochrome b561 domain-containing protein At2g30890, transcript variant X1	TCONS_00032842	sbi-miR156e	10	0.322581	2.37214e-07
XM_020844477.2	cytochrome b561 domain-containing protein At2g30890, transcript variant X1	TCONS_00032842	sly-miR156e-5p	10	0.322581	2.37214e-07
XM_020844568.2	auxin response factor 17, transcript variant X1	TCONS_00024879	aly-miR160a-5p	11	1	2.33465e-18
XM_020844568.2	auxin response factor 17, transcript variant X1	TCONS_00024879	csi-miR160c-5p	11	1	2.33465e-18
XM_020844568.2	auxin response factor 17, transcript variant X1	TCONS_00024879	mes-miR160h	11	1	2.33465e-18
XM_020844798.2	APETALA2-like protein 2, transcript variant X1	TCONS_00017098	aly-miR172a-3p	14	1	1.07278e-17
XM_020844798.2	APETALA2-like protein 2, transcript variant X1	TCONS_00017098	aly-miR172e-3p	14	1	1.07278e-17
XM_020844798.2	APETALA2-like protein 2, transcript variant X1	TCONS_00017098	aqc-miR172b	14	1	1.07278e-17
XM_020844798.2	APETALA2-like protein 2, transcript variant X1	TCONS_00017098	ata-miR172a-3p	14	1	1.07278e-17
XM_020844798.2	APETALA2-like protein 2, transcript variant X1	TCONS_00017098	gma-miR172k	14	1	1.07278e-17
XM_020845461.2	growth-regulating factor 4	TCONS_00010760	aau-miR396	12	1	6.88006e-23
XM_020845461.2	growth-regulating factor 4	TCONS_00010760	gma-miR396e	12	1	6.88006e-23
XM_020845461.2	growth-regulating factor 4	TCONS_00010760	gma-miR396h	12	1	6.88006e-23
XM_020845461.2	growth-regulating factor 4	TCONS_00010760	mdm-miR396a	12	1	6.88006e-23
XM_020845461.2	growth-regulating factor 4	TCONS_00010760	NW_021318846.1_2647_star	12	1	6.88006e-23
XM_020845461.2	growth-regulating factor 4	TCONS_00010760	pab-miR396a-5p	12	1	6.88006e-23
XM_020845461.2	growth-regulating factor 4	TCONS_00010760	vca-miR396-5p	12	1	6.88006e-23
XM_020845461.2	growth-regulating factor 4	XR_003700291.1	aau-miR396	12	0.444444	6.88006e-23
XM_020845461.2	growth-regulating factor 4	XR_003700291.1	aof-miR396a	12	0.444444	6.88006e-23
XM_020845461.2	growth-regulating factor 4	XR_003700291.1	gma-miR396e	12	0.444444	6.88006e-23
XM_020845461.2	growth-regulating factor 4	XR_003700291.1	gma-miR396h	12	0.444444	6.88006e-23
XM_020845461.2	growth-regulating factor 4	XR_003700291.1	mdm-miR396a	12	0.444444	6.88006e-23
XM_020845461.2	growth-regulating factor 4	XR_003700291.1	NW_021318846.1_2647_star	12	0.444444	6.88006e-23
XM_020845461.2	growth-regulating factor 4	XR_003700291.1	pab-miR396a-5p	12	0.444444	6.88006e-23
XM_020845461.2	growth-regulating factor 4	XR_003700291.1	vca-miR396-5p	12	0.444444	6.88006e-23
XM_020845461.2	growth-regulating factor 4	XR_003701085.1	aau-miR396	12	0.923077	6.88006e-23
XM_020845461.2	growth-regulating factor 4	XR_003701085.1	aof-miR396a	12	0.923077	6.88006e-23
XM_020845461.2	growth-regulating factor 4	XR_003701085.1	gma-miR396e	12	0.923077	6.88006e-23
XM_020845461.2	growth-regulating factor 4	XR_003701085.1	gma-miR396h	12	0.923077	6.88006e-23
XM_020845461.2	growth-regulating factor 4	XR_003701085.1	mdm-miR396a	12	0.923077	6.88006e-23
XM_020845461.2	growth-regulating factor 4	XR_003701085.1	NW_021318846.1_2647_star	12	0.923077	6.88006e-23
XM_020845461.2	growth-regulating factor 4	XR_003701085.1	pab-miR396a-5p	12	0.923077	6.88006e-23
XM_020845461.2	growth-regulating factor 4	XR_003701085.1	vca-miR396-5p	12	0.923077	6.88006e-23
XM_020845461.2	growth-regulating factor 4	XR_003701912.1	aau-miR396	12	0.705882	6.88006e-23
XM_020845461.2	growth-regulating factor 4	XR_003701912.1	aof-miR396a	12	0.705882	6.88006e-23
XM_020845461.2	growth-regulating factor 4	XR_003701912.1	gma-miR396e	12	0.705882	6.88006e-23
XM_020845461.2	growth-regulating factor 4	XR_003701912.1	gma-miR396h	12	0.705882	6.88006e-23
XM_020845461.2	growth-regulating factor 4	XR_003701912.1	mdm-miR396a	12	0.705882	6.88006e-23
XM_020845461.2	growth-regulating factor 4	XR_003701912.1	NW_021318846.1_2647_star	12	0.705882	6.88006e-23
XM_020845461.2	growth-regulating factor 4	XR_003701912.1	pab-miR396a-5p	12	0.705882	6.88006e-23
XM_020845461.2	growth-regulating factor 4	XR_003701912.1	vca-miR396-5p	12	0.705882	6.88006e-23
XM_020845600.2	abscisic acid 8'-hydroxylase CYP707A2-like	TCONS_00010760	aau-miR396	10	0.833333	0
XM_020845600.2	abscisic acid 8'-hydroxylase CYP707A2-like	TCONS_00010760	gma-miR396e	10	0.833333	0
XM_020845600.2	abscisic acid 8'-hydroxylase CYP707A2-like	TCONS_00010760	gma-miR396h	10	0.833333	0
XM_020845600.2	abscisic acid 8'-hydroxylase CYP707A2-like	TCONS_00010760	mdm-miR396a	10	0.833333	0
XM_020845600.2	abscisic acid 8'-hydroxylase CYP707A2-like	TCONS_00010760	NW_021318846.1_2647_star	10	0.833333	0
XM_020845600.2	abscisic acid 8'-hydroxylase CYP707A2-like	TCONS_00010760	pab-miR396a-5p	10	0.833333	0
XM_020845600.2	abscisic acid 8'-hydroxylase CYP707A2-like	TCONS_00010760	vca-miR396-5p	10	0.833333	0
XM_020845600.2	abscisic acid 8'-hydroxylase CYP707A2-like	XR_003700291.1	aau-miR396	10	0.37037	0
XM_020845600.2	abscisic acid 8'-hydroxylase CYP707A2-like	XR_003700291.1	gma-miR396e	10	0.37037	0
XM_020845600.2	abscisic acid 8'-hydroxylase CYP707A2-like	XR_003700291.1	gma-miR396h	10	0.37037	0
XM_020845600.2	abscisic acid 8'-hydroxylase CYP707A2-like	XR_003700291.1	mdm-miR396a	10	0.37037	0
XM_020845600.2	abscisic acid 8'-hydroxylase CYP707A2-like	XR_003700291.1	NW_021318846.1_2647_star	10	0.37037	0
XM_020845600.2	abscisic acid 8'-hydroxylase CYP707A2-like	XR_003700291.1	pab-miR396a-5p	10	0.37037	0
XM_020845600.2	abscisic acid 8'-hydroxylase CYP707A2-like	XR_003700291.1	vca-miR396-5p	10	0.37037	0
XM_020845600.2	abscisic acid 8'-hydroxylase CYP707A2-like	XR_003701085.1	aau-miR396	10	0.769231	0
XM_020845600.2	abscisic acid 8'-hydroxylase CYP707A2-like	XR_003701085.1	gma-miR396e	10	0.769231	0
XM_020845600.2	abscisic acid 8'-hydroxylase CYP707A2-like	XR_003701085.1	gma-miR396h	10	0.769231	0
XM_020845600.2	abscisic acid 8'-hydroxylase CYP707A2-like	XR_003701085.1	mdm-miR396a	10	0.769231	0
XM_020845600.2	abscisic acid 8'-hydroxylase CYP707A2-like	XR_003701085.1	NW_021318846.1_2647_star	10	0.769231	0
XM_020845600.2	abscisic acid 8'-hydroxylase CYP707A2-like	XR_003701085.1	pab-miR396a-5p	10	0.769231	0
XM_020845600.2	abscisic acid 8'-hydroxylase CYP707A2-like	XR_003701085.1	vca-miR396-5p	10	0.769231	0
XM_020845600.2	abscisic acid 8'-hydroxylase CYP707A2-like	XR_003701912.1	aau-miR396	10	0.588235	0
XM_020845600.2	abscisic acid 8'-hydroxylase CYP707A2-like	XR_003701912.1	gma-miR396e	10	0.588235	0
XM_020845600.2	abscisic acid 8'-hydroxylase CYP707A2-like	XR_003701912.1	gma-miR396h	10	0.588235	0
XM_020845600.2	abscisic acid 8'-hydroxylase CYP707A2-like	XR_003701912.1	mdm-miR396a	10	0.588235	0
XM_020845600.2	abscisic acid 8'-hydroxylase CYP707A2-like	XR_003701912.1	NW_021318846.1_2647_star	10	0.588235	0
XM_020845600.2	abscisic acid 8'-hydroxylase CYP707A2-like	XR_003701912.1	pab-miR396a-5p	10	0.588235	0
XM_020845600.2	abscisic acid 8'-hydroxylase CYP707A2-like	XR_003701912.1	vca-miR396-5p	10	0.588235	0
XM_020845644.2	pentatricopeptide repeat-containing protein At4g38150-like	TCONS_00026869	aly-miR167a-5p	11	0.733333	1.93944e-21
XM_020845644.2	pentatricopeptide repeat-containing protein At4g38150-like	TCONS_00026869	bna-miR167a	11	0.733333	1.93944e-21
XM_020845644.2	pentatricopeptide repeat-containing protein At4g38150-like	TCONS_00018697	aly-miR167a-5p	10	0.833333	2.46264e-18
XM_020845644.2	pentatricopeptide repeat-containing protein At4g38150-like	TCONS_00018697	bna-miR167a	10	0.833333	2.46264e-18
XM_020845644.2	pentatricopeptide repeat-containing protein At4g38150-like	XR_003702199.1	aly-miR167a-5p	10	0.263158	2.46264e-18
XM_020845644.2	pentatricopeptide repeat-containing protein At4g38150-like	XR_003702199.1	bna-miR167a	10	0.263158	2.46264e-18
XM_020845644.2	pentatricopeptide repeat-containing protein At4g38150-like	XR_003702200.1	aly-miR167a-5p	10	0.277778	2.46264e-18
XM_020845644.2	pentatricopeptide repeat-containing protein At4g38150-like	XR_003702200.1	bna-miR167a	10	0.277778	2.46264e-18
XM_020846393.2	protein IQ-DOMAIN 1, transcript variant X1	XR_002303219.2	aly-miR156a-5p	11	0.289474	4.16891e-16
XM_020846393.2	protein IQ-DOMAIN 1, transcript variant X1	XR_002303219.2	aly-miR156g-5p	11	0.289474	4.16891e-16
XM_020846393.2	protein IQ-DOMAIN 1, transcript variant X1	XR_002303219.2	bna-miR156a	11	0.289474	4.16891e-16
XM_020846393.2	protein IQ-DOMAIN 1, transcript variant X1	XR_002303219.2	cca-miR156b	11	0.289474	4.16891e-16
XM_020846393.2	protein IQ-DOMAIN 1, transcript variant X1	XR_002303219.2	gma-miR156q	11	0.289474	4.16891e-16
XM_020846393.2	protein IQ-DOMAIN 1, transcript variant X1	XR_002303219.2	pab-miR156b	11	0.289474	4.16891e-16
XM_020846393.2	protein IQ-DOMAIN 1, transcript variant X1	XR_003701652.1	aly-miR156a-5p	10	0.526316	5.78207e-14
XM_020846393.2	protein IQ-DOMAIN 1, transcript variant X1	XR_003701652.1	bna-miR156a	10	0.526316	5.78207e-14
XM_020846393.2	protein IQ-DOMAIN 1, transcript variant X1	XR_003701652.1	cca-miR156b	10	0.526316	5.78207e-14
XM_020846393.2	protein IQ-DOMAIN 1, transcript variant X1	XR_003701652.1	gma-miR156q	10	0.526316	5.78207e-14
XM_020846393.2	protein IQ-DOMAIN 1, transcript variant X1	XR_003701652.1	mtr-miR156j	10	0.526316	5.78207e-14
XM_020846393.2	protein IQ-DOMAIN 1, transcript variant X1	XR_003701652.1	pab-miR156b	10	0.526316	5.78207e-14
XM_020846630.2	growth-regulating factor 4-like	XR_003700291.1	aau-miR396	13	0.481481	2.6078e-24
XM_020846630.2	growth-regulating factor 4-like	XR_003700291.1	aof-miR396a	13	0.481481	2.6078e-24
XM_020846630.2	growth-regulating factor 4-like	XR_003700291.1	gma-miR396e	13	0.481481	2.6078e-24
XM_020846630.2	growth-regulating factor 4-like	XR_003700291.1	gma-miR396h	13	0.481481	2.6078e-24
XM_020846630.2	growth-regulating factor 4-like	XR_003700291.1	mdm-miR396a	13	0.481481	2.6078e-24
XM_020846630.2	growth-regulating factor 4-like	XR_003700291.1	NW_021318846.1_2647_star	13	0.481481	2.6078e-24
XM_020846630.2	growth-regulating factor 4-like	XR_003700291.1	pab-miR396a-5p	13	0.481481	2.6078e-24
XM_020846630.2	growth-regulating factor 4-like	XR_003700291.1	vca-miR396-5p	13	0.481481	2.6078e-24
XM_020846630.2	growth-regulating factor 4-like	TCONS_00010760	aau-miR396	12	1	3.84459e-21
XM_020846630.2	growth-regulating factor 4-like	TCONS_00010760	gma-miR396e	12	1	3.84459e-21
XM_020846630.2	growth-regulating factor 4-like	TCONS_00010760	gma-miR396h	12	1	3.84459e-21
XM_020846630.2	growth-regulating factor 4-like	TCONS_00010760	mdm-miR396a	12	1	3.84459e-21
XM_020846630.2	growth-regulating factor 4-like	TCONS_00010760	NW_021318846.1_2647_star	12	1	3.84459e-21
XM_020846630.2	growth-regulating factor 4-like	TCONS_00010760	pab-miR396a-5p	12	1	3.84459e-21
XM_020846630.2	growth-regulating factor 4-like	TCONS_00010760	vca-miR396-5p	12	1	3.84459e-21
XM_020846630.2	growth-regulating factor 4-like	XR_003701085.1	aau-miR396	12	0.923077	3.84459e-21
XM_020846630.2	growth-regulating factor 4-like	XR_003701085.1	aof-miR396a	12	0.923077	3.84459e-21
XM_020846630.2	growth-regulating factor 4-like	XR_003701085.1	gma-miR396e	12	0.923077	3.84459e-21
XM_020846630.2	growth-regulating factor 4-like	XR_003701085.1	gma-miR396h	12	0.923077	3.84459e-21
XM_020846630.2	growth-regulating factor 4-like	XR_003701085.1	mdm-miR396a	12	0.923077	3.84459e-21
XM_020846630.2	growth-regulating factor 4-like	XR_003701085.1	NW_021318846.1_2647_star	12	0.923077	3.84459e-21
XM_020846630.2	growth-regulating factor 4-like	XR_003701085.1	pab-miR396a-5p	12	0.923077	3.84459e-21
XM_020846630.2	growth-regulating factor 4-like	XR_003701085.1	vca-miR396-5p	12	0.923077	3.84459e-21
XM_020846630.2	growth-regulating factor 4-like	XR_003701912.1	aau-miR396	12	0.705882	3.84459e-21
XM_020846630.2	growth-regulating factor 4-like	XR_003701912.1	aof-miR396a	12	0.705882	3.84459e-21
XM_020846630.2	growth-regulating factor 4-like	XR_003701912.1	gma-miR396e	12	0.705882	3.84459e-21
XM_020846630.2	growth-regulating factor 4-like	XR_003701912.1	gma-miR396h	12	0.705882	3.84459e-21
XM_020846630.2	growth-regulating factor 4-like	XR_003701912.1	mdm-miR396a	12	0.705882	3.84459e-21
XM_020846630.2	growth-regulating factor 4-like	XR_003701912.1	NW_021318846.1_2647_star	12	0.705882	3.84459e-21
XM_020846630.2	growth-regulating factor 4-like	XR_003701912.1	pab-miR396a-5p	12	0.705882	3.84459e-21
XM_020846630.2	growth-regulating factor 4-like	XR_003701912.1	vca-miR396-5p	12	0.705882	3.84459e-21
XM_020846630.2	growth-regulating factor 4-like	XR_003702242.1	aau-miR396	10	0.555556	7.3479e-16
XM_020846630.2	growth-regulating factor 4-like	XR_003702242.1	gma-miR396e	10	0.555556	7.3479e-16
XM_020846630.2	growth-regulating factor 4-like	XR_003702242.1	gma-miR396h	10	0.555556	7.3479e-16
XM_020846630.2	growth-regulating factor 4-like	XR_003702242.1	mdm-miR396a	10	0.555556	7.3479e-16
XM_020846630.2	growth-regulating factor 4-like	XR_003702242.1	NW_021318846.1_2647_star	10	0.555556	7.3479e-16
XM_020846630.2	growth-regulating factor 4-like	XR_003702242.1	pab-miR396a-5p	10	0.555556	7.3479e-16
XM_020846630.2	growth-regulating factor 4-like	XR_003702242.1	vca-miR396-5p	10	0.555556	7.3479e-16
XM_020847015.2	serine carboxypeptidase-like 18	TCONS_00024879	aly-miR160a-5p	11	1	5.99216e-09
XM_020847015.2	serine carboxypeptidase-like 18	TCONS_00024879	csi-miR160c-5p	11	1	5.99216e-09
XM_020847015.2	serine carboxypeptidase-like 18	TCONS_00024879	mes-miR160h	11	1	5.99216e-09
XM_020847879.2	tRNA (guanine(9)-N1)-methyltransferase	XR_003701328.1	aly-miR169a-5p	16	0.238806	6.30632e-31
XM_020848906.2	uncharacterized LOC110115623, transcript variant X3	XR_002302757.2	gma-miR169c	17	0.809524	9.66864e-28
XM_020848907.2	uncharacterized LOC110115623, transcript variant X4	TCONS_00017086	cme-miR159b	15	0.882353	3.53623e-22
XM_020848907.2	uncharacterized LOC110115623, transcript variant X4	TCONS_00017086	cpa-miR159b	15	0.882353	3.53623e-22
XM_020848907.2	uncharacterized LOC110115623, transcript variant X4	TCONS_00017086	fve-miR159c	15	0.882353	3.53623e-22
XM_020848907.2	uncharacterized LOC110115623, transcript variant X4	TCONS_00017086	osa-miR159c	15	0.882353	3.53623e-22
XM_020848907.2	uncharacterized LOC110115623, transcript variant X4	TCONS_00017086	osa-miR159d	15	0.882353	3.53623e-22
XM_020848907.2	uncharacterized LOC110115623, transcript variant X4	TCONS_00017086	pta-miR159c	15	0.882353	3.53623e-22
XM_020848907.2	uncharacterized LOC110115623, transcript variant X4	TCONS_00017086	ptc-miR159d	15	0.882353	3.53623e-22
XM_020848907.2	uncharacterized LOC110115623, transcript variant X4	TCONS_00032841	aly-miR159c-3p	15	0.555556	3.53623e-22
XM_020848907.2	uncharacterized LOC110115623, transcript variant X4	TCONS_00032841	bdi-miR159a-3p	15	0.555556	3.53623e-22
XM_020848907.2	uncharacterized LOC110115623, transcript variant X4	TCONS_00032841	cme-miR159b	15	0.555556	3.53623e-22
XM_020848907.2	uncharacterized LOC110115623, transcript variant X4	TCONS_00032841	cpa-miR159b	15	0.555556	3.53623e-22
XM_020848907.2	uncharacterized LOC110115623, transcript variant X4	TCONS_00032841	fve-miR159c	15	0.555556	3.53623e-22
XM_020848907.2	uncharacterized LOC110115623, transcript variant X4	TCONS_00032841	osa-miR159d	15	0.555556	3.53623e-22
XM_020848907.2	uncharacterized LOC110115623, transcript variant X4	TCONS_00032841	osa-miR159f	15	0.555556	3.53623e-22
XM_020848907.2	uncharacterized LOC110115623, transcript variant X4	TCONS_00032841	pta-miR159a	15	0.555556	3.53623e-22
XM_020848907.2	uncharacterized LOC110115623, transcript variant X4	TCONS_00032841	pta-miR159c	15	0.555556	3.53623e-22
XM_020848907.2	uncharacterized LOC110115623, transcript variant X4	TCONS_00032841	ptc-miR159d	15	0.555556	3.53623e-22
XM_020848907.2	uncharacterized LOC110115623, transcript variant X4	TCONS_00032842	aly-miR159c-3p	15	0.483871	3.53623e-22
XM_020848907.2	uncharacterized LOC110115623, transcript variant X4	TCONS_00032842	bdi-miR159a-3p	15	0.483871	3.53623e-22
XM_020848907.2	uncharacterized LOC110115623, transcript variant X4	TCONS_00032842	cme-miR159b	15	0.483871	3.53623e-22
XM_020848907.2	uncharacterized LOC110115623, transcript variant X4	TCONS_00032842	cpa-miR159b	15	0.483871	3.53623e-22
XM_020848907.2	uncharacterized LOC110115623, transcript variant X4	TCONS_00032842	fve-miR159c	15	0.483871	3.53623e-22
XM_020848907.2	uncharacterized LOC110115623, transcript variant X4	TCONS_00032842	osa-miR159d	15	0.483871	3.53623e-22
XM_020848907.2	uncharacterized LOC110115623, transcript variant X4	TCONS_00032842	osa-miR159f	15	0.483871	3.53623e-22
XM_020848907.2	uncharacterized LOC110115623, transcript variant X4	TCONS_00032842	pta-miR159a	15	0.483871	3.53623e-22
XM_020848907.2	uncharacterized LOC110115623, transcript variant X4	TCONS_00032842	pta-miR159c	15	0.483871	3.53623e-22
XM_020848907.2	uncharacterized LOC110115623, transcript variant X4	TCONS_00032842	ptc-miR159d	15	0.483871	3.53623e-22
XM_020850430.2	fasciclin-like arabinogalactan protein 11	XR_003701426.1	aau-miR319	16	0.571429	8.03058e-25
XM_020850430.2	fasciclin-like arabinogalactan protein 11	XR_003701426.1	aly-miR159c-3p	16	0.571429	8.03058e-25
XM_020850430.2	fasciclin-like arabinogalactan protein 11	XR_003701426.1	aly-miR319c-3p	16	0.571429	8.03058e-25
XM_020850430.2	fasciclin-like arabinogalactan protein 11	XR_003701426.1	atr-miR319a	16	0.571429	8.03058e-25
XM_020850430.2	fasciclin-like arabinogalactan protein 11	XR_003701426.1	cme-miR319c	16	0.571429	8.03058e-25
XM_020850430.2	fasciclin-like arabinogalactan protein 11	XR_003701426.1	gma-miR319g	16	0.571429	8.03058e-25
XM_020850430.2	fasciclin-like arabinogalactan protein 11	XR_003701426.1	gma-miR319p	16	0.571429	8.03058e-25
XM_020850430.2	fasciclin-like arabinogalactan protein 11	XR_003701426.1	mtr-miR319c-3p	16	0.571429	8.03058e-25
XM_020850430.2	fasciclin-like arabinogalactan protein 11	XR_003701426.1	pta-miR319	16	0.571429	8.03058e-25
XM_020850430.2	fasciclin-like arabinogalactan protein 11	TCONS_00005590	aly-miR159c-3p	10	0.909091	9.64503e-12
XM_028693186.1	uncharacterized LOC110106860, transcript variant X3	XR_003701426.1	aau-miR319	16	0.571429	3.11706e-10
XM_028693186.1	uncharacterized LOC110106860, transcript variant X3	XR_003701426.1	aly-miR159c-3p	16	0.571429	3.11706e-10
XM_028693186.1	uncharacterized LOC110106860, transcript variant X3	XR_003701426.1	aly-miR319c-3p	16	0.571429	3.11706e-10
XM_028693186.1	uncharacterized LOC110106860, transcript variant X3	XR_003701426.1	atr-miR319a	16	0.571429	3.11706e-10
XM_028693186.1	uncharacterized LOC110106860, transcript variant X3	XR_003701426.1	cme-miR319c	16	0.571429	3.11706e-10
XM_028693186.1	uncharacterized LOC110106860, transcript variant X3	XR_003701426.1	cpa-miR319	16	0.571429	3.11706e-10
XM_028693186.1	uncharacterized LOC110106860, transcript variant X3	XR_003701426.1	csi-miR159c-3p	16	0.571429	3.11706e-10
XM_028693186.1	uncharacterized LOC110106860, transcript variant X3	XR_003701426.1	gma-miR319g	16	0.571429	3.11706e-10
XM_028693186.1	uncharacterized LOC110106860, transcript variant X3	XR_003701426.1	mes-miR319h	16	0.571429	3.11706e-10
XM_028693186.1	uncharacterized LOC110106860, transcript variant X3	XR_003701426.1	mtr-miR319c-3p	16	0.571429	3.11706e-10
XM_028693186.1	uncharacterized LOC110106860, transcript variant X3	XR_003701426.1	ppt-miR319a	16	0.571429	3.11706e-10
XM_028693186.1	uncharacterized LOC110106860, transcript variant X3	XR_003701426.1	pta-miR319	16	0.571429	3.11706e-10
XM_028693186.1	uncharacterized LOC110106860, transcript variant X3	XR_002305298.2	bdi-miR159a-3p	12	0.705882	3.45143e-06
XM_028693186.1	uncharacterized LOC110106860, transcript variant X3	XR_002305298.2	cpa-miR159b	12	0.705882	3.45143e-06
XM_028693186.1	uncharacterized LOC110106860, transcript variant X3	XR_002305298.2	csi-miR159c-3p	12	0.705882	3.45143e-06
XM_028693186.1	uncharacterized LOC110106860, transcript variant X3	XR_002305298.2	mes-miR319h	12	0.705882	3.45143e-06
XM_028693186.1	uncharacterized LOC110106860, transcript variant X3	XR_002305298.2	NW_021320138.1_11162	12	0.705882	3.45143e-06
XM_028693186.1	uncharacterized LOC110106860, transcript variant X3	XR_002305298.2	ppt-miR319a	12	0.705882	3.45143e-06
XM_028693186.1	uncharacterized LOC110106860, transcript variant X3	XR_002305298.2	pta-miR159c	12	0.705882	3.45143e-06
XM_028693186.1	uncharacterized LOC110106860, transcript variant X3	XR_002305298.2	ptc-miR159d	12	0.705882	3.45143e-06
XM_028693186.1	uncharacterized LOC110106860, transcript variant X3	TCONS_00017086	cme-miR159b	11	0.647059	2.43879e-05
XM_028693186.1	uncharacterized LOC110106860, transcript variant X3	TCONS_00017086	cpa-miR159b	11	0.647059	2.43879e-05
XM_028693186.1	uncharacterized LOC110106860, transcript variant X3	TCONS_00017086	fve-miR159c	11	0.647059	2.43879e-05
XM_028693186.1	uncharacterized LOC110106860, transcript variant X3	TCONS_00017086	osa-miR159c	11	0.647059	2.43879e-05
XM_028693186.1	uncharacterized LOC110106860, transcript variant X3	TCONS_00017086	osa-miR159d	11	0.647059	2.43879e-05
XM_028693186.1	uncharacterized LOC110106860, transcript variant X3	TCONS_00017086	pta-miR159c	11	0.647059	2.43879e-05
XM_028693186.1	uncharacterized LOC110106860, transcript variant X3	TCONS_00017086	ptc-miR159d	11	0.647059	2.43879e-05
XM_028693186.1	uncharacterized LOC110106860, transcript variant X3	TCONS_00032841	aly-miR159c-3p	11	0.407407	2.43879e-05
XM_028693186.1	uncharacterized LOC110106860, transcript variant X3	TCONS_00032841	bdi-miR159a-3p	11	0.407407	2.43879e-05
XM_028693186.1	uncharacterized LOC110106860, transcript variant X3	TCONS_00032841	cme-miR159b	11	0.407407	2.43879e-05
XM_028693186.1	uncharacterized LOC110106860, transcript variant X3	TCONS_00032841	cpa-miR159b	11	0.407407	2.43879e-05
XM_028693186.1	uncharacterized LOC110106860, transcript variant X3	TCONS_00032841	fve-miR159c	11	0.407407	2.43879e-05
XM_028693186.1	uncharacterized LOC110106860, transcript variant X3	TCONS_00032841	osa-miR159d	11	0.407407	2.43879e-05
XM_028693186.1	uncharacterized LOC110106860, transcript variant X3	TCONS_00032841	pta-miR159a	11	0.407407	2.43879e-05
XM_028693186.1	uncharacterized LOC110106860, transcript variant X3	TCONS_00032841	pta-miR159c	11	0.407407	2.43879e-05
XM_028693186.1	uncharacterized LOC110106860, transcript variant X3	TCONS_00032841	ptc-miR159d	11	0.407407	2.43879e-05
XM_028693186.1	uncharacterized LOC110106860, transcript variant X3	TCONS_00032842	aly-miR159c-3p	11	0.354839	2.43879e-05
XM_028693186.1	uncharacterized LOC110106860, transcript variant X3	TCONS_00032842	bdi-miR159a-3p	11	0.354839	2.43879e-05
XM_028693186.1	uncharacterized LOC110106860, transcript variant X3	TCONS_00032842	cme-miR159b	11	0.354839	2.43879e-05
XM_028693186.1	uncharacterized LOC110106860, transcript variant X3	TCONS_00032842	cpa-miR159b	11	0.354839	2.43879e-05
XM_028693186.1	uncharacterized LOC110106860, transcript variant X3	TCONS_00032842	fve-miR159c	11	0.354839	2.43879e-05
XM_028693186.1	uncharacterized LOC110106860, transcript variant X3	TCONS_00032842	osa-miR159d	11	0.354839	2.43879e-05
XM_028693186.1	uncharacterized LOC110106860, transcript variant X3	TCONS_00032842	pta-miR159a	11	0.354839	2.43879e-05
XM_028693186.1	uncharacterized LOC110106860, transcript variant X3	TCONS_00032842	pta-miR159c	11	0.354839	2.43879e-05
XM_028693186.1	uncharacterized LOC110106860, transcript variant X3	TCONS_00032842	ptc-miR159d	11	0.354839	2.43879e-05
XM_028695861.1	bifunctional aspartate aminotransferase and glutamate/aspartate-prephenate aminotransferase, transcript variant X1	XR_003701426.1	aau-miR319	11	0.392857	6.92187e-10
XM_028695861.1	bifunctional aspartate aminotransferase and glutamate/aspartate-prephenate aminotransferase, transcript variant X1	XR_003701426.1	aly-miR319c-3p	11	0.392857	6.92187e-10
XM_028695861.1	bifunctional aspartate aminotransferase and glutamate/aspartate-prephenate aminotransferase, transcript variant X1	XR_003701426.1	atr-miR319a	11	0.392857	6.92187e-10
XM_028695861.1	bifunctional aspartate aminotransferase and glutamate/aspartate-prephenate aminotransferase, transcript variant X1	XR_003701426.1	bdi-miR319b-3p	11	0.392857	6.92187e-10
XM_028695861.1	bifunctional aspartate aminotransferase and glutamate/aspartate-prephenate aminotransferase, transcript variant X1	XR_003701426.1	cme-miR319c	11	0.392857	6.92187e-10
XM_028695861.1	bifunctional aspartate aminotransferase and glutamate/aspartate-prephenate aminotransferase, transcript variant X1	XR_003701426.1	mtr-miR319c-3p	11	0.392857	6.92187e-10
XM_028695861.1	bifunctional aspartate aminotransferase and glutamate/aspartate-prephenate aminotransferase, transcript variant X1	XR_003701426.1	pta-miR319	11	0.392857	6.92187e-10
XM_028696023.1	uncharacterized LOC110096511, transcript variant X1	XR_003701328.1	aly-miR169a-5p	18	0.268657	4.89115e-31
XM_028696023.1	uncharacterized LOC110096511, transcript variant X1	XR_003701328.1	gma-miR169c	18	0.268657	4.89115e-31
XM_028696277.1	uncharacterized LOC110098021	XR_003702199.1	aly-miR167a-5p	11	0.289474	2.33465e-18
XM_028696277.1	uncharacterized LOC110098021	XR_003702200.1	aly-miR167a-5p	11	0.305556	2.33465e-18
XM_028696277.1	uncharacterized LOC110098021	TCONS_00018697	aly-miR167a-5p	10	0.833333	7.3479e-16
XM_028696614.1	auxin response factor 17, transcript variant X2	TCONS_00024879	aly-miR160a-5p	11	1	2.33465e-18
XM_028696614.1	auxin response factor 17, transcript variant X2	TCONS_00024879	csi-miR160c-5p	11	1	2.33465e-18
XM_028696614.1	auxin response factor 17, transcript variant X2	TCONS_00024879	mes-miR160h	11	1	2.33465e-18
XM_028696991.1	uncharacterized LOC110107417	TCONS_00026869	aly-miR167a-5p	14	0.933333	3.19826e-14
XM_028696991.1	uncharacterized LOC110107417	TCONS_00026869	bna-miR167a	14	0.933333	3.19826e-14
XM_028696991.1	uncharacterized LOC110107417	XR_003702199.1	aly-miR167a-5p	13	0.342105	1.36814e-12
XM_028696991.1	uncharacterized LOC110107417	XR_003702199.1	bna-miR167a	13	0.342105	1.36814e-12
XM_028696991.1	uncharacterized LOC110107417	XR_003702200.1	aly-miR167a-5p	13	0.361111	1.36814e-12
XM_028696991.1	uncharacterized LOC110107417	XR_003702200.1	bna-miR167a	13	0.361111	1.36814e-12
XM_028696991.1	uncharacterized LOC110107417	TCONS_00018697	aly-miR167a-5p	11	0.916667	1.18899e-09
XM_028696991.1	uncharacterized LOC110107417	TCONS_00018697	bna-miR167a	11	0.916667	1.18899e-09
XM_028697020.1	LEAF RUST 10 DISEASE-RESISTANCE LOCUS RECEPTOR-LIKE PROTEIN KINASE-like 1.2, transcript variant X2	XR_003701426.1	aau-miR319	10	0.357143	2.02782e-12
XM_028697020.1	LEAF RUST 10 DISEASE-RESISTANCE LOCUS RECEPTOR-LIKE PROTEIN KINASE-like 1.2, transcript variant X2	XR_003701426.1	atr-miR319a	10	0.357143	2.02782e-12
XM_028697020.1	LEAF RUST 10 DISEASE-RESISTANCE LOCUS RECEPTOR-LIKE PROTEIN KINASE-like 1.2, transcript variant X2	XR_003701426.1	cme-miR319c	10	0.357143	2.02782e-12
XM_028697020.1	LEAF RUST 10 DISEASE-RESISTANCE LOCUS RECEPTOR-LIKE PROTEIN KINASE-like 1.2, transcript variant X2	XR_003701426.1	cpa-miR319	10	0.357143	2.02782e-12
XM_028697020.1	LEAF RUST 10 DISEASE-RESISTANCE LOCUS RECEPTOR-LIKE PROTEIN KINASE-like 1.2, transcript variant X2	XR_003701426.1	csi-miR159c-3p	10	0.357143	2.02782e-12
XM_028697020.1	LEAF RUST 10 DISEASE-RESISTANCE LOCUS RECEPTOR-LIKE PROTEIN KINASE-like 1.2, transcript variant X2	XR_003701426.1	mes-miR319h	10	0.357143	2.02782e-12
XM_028697020.1	LEAF RUST 10 DISEASE-RESISTANCE LOCUS RECEPTOR-LIKE PROTEIN KINASE-like 1.2, transcript variant X2	XR_003701426.1	mtr-miR319c-3p	10	0.357143	2.02782e-12
XM_028697020.1	LEAF RUST 10 DISEASE-RESISTANCE LOCUS RECEPTOR-LIKE PROTEIN KINASE-like 1.2, transcript variant X2	XR_003701426.1	ppt-miR319a	10	0.357143	2.02782e-12
XM_028697020.1	LEAF RUST 10 DISEASE-RESISTANCE LOCUS RECEPTOR-LIKE PROTEIN KINASE-like 1.2, transcript variant X2	XR_003701426.1	pta-miR319	10	0.357143	2.02782e-12
XM_028697104.1	lactase-phlorizin hydrolase	TCONS_00024832	aly-miR395d-3p	11	0.916667	3.67849e-17
XM_028697104.1	lactase-phlorizin hydrolase	TCONS_00024832	ata-miR395e-3p	11	0.916667	3.67849e-17
XM_028697104.1	lactase-phlorizin hydrolase	TCONS_00024832	cme-miR395b	11	0.916667	3.67849e-17
XM_028697104.1	lactase-phlorizin hydrolase	TCONS_00024832	eun-miR395-3p	11	0.916667	3.67849e-17
XM_028697104.1	lactase-phlorizin hydrolase	TCONS_00024832	sly-miR395a	11	0.916667	3.67849e-17
XM_028697104.1	lactase-phlorizin hydrolase	TCONS_00025990	aly-miR395d-3p	11	0.916667	3.67849e-17
XM_028697104.1	lactase-phlorizin hydrolase	TCONS_00025990	aof-miR395a	11	0.916667	3.67849e-17
XM_028697104.1	lactase-phlorizin hydrolase	TCONS_00025990	ata-miR395e-3p	11	0.916667	3.67849e-17
XM_028697104.1	lactase-phlorizin hydrolase	TCONS_00025990	cme-miR395b	11	0.916667	3.67849e-17
XM_028697104.1	lactase-phlorizin hydrolase	TCONS_00025990	eun-miR395-3p	11	0.916667	3.67849e-17
XM_028697104.1	lactase-phlorizin hydrolase	TCONS_00025990	osa-miR395b	11	0.916667	3.67849e-17
XM_028697104.1	lactase-phlorizin hydrolase	TCONS_00025990	sly-miR395a	11	0.916667	3.67849e-17
XM_028697192.1	F-box/kelch-repeat protein SKIP30, transcript variant X2	TCONS_00026869	aly-miR167a-5p	14	0.933333	7.65167e-13
XM_028697192.1	F-box/kelch-repeat protein SKIP30, transcript variant X2	TCONS_00026869	bna-miR167a	14	0.933333	7.65167e-13
XM_028697192.1	F-box/kelch-repeat protein SKIP30, transcript variant X2	XR_003702199.1	aly-miR167a-5p	14	0.368421	7.65167e-13
XM_028697192.1	F-box/kelch-repeat protein SKIP30, transcript variant X2	XR_003702199.1	bna-miR167a	14	0.368421	7.65167e-13
XM_028697192.1	F-box/kelch-repeat protein SKIP30, transcript variant X2	XR_003702200.1	aly-miR167a-5p	14	0.388889	7.65167e-13
XM_028697192.1	F-box/kelch-repeat protein SKIP30, transcript variant X2	XR_003702200.1	bna-miR167a	14	0.388889	7.65167e-13
XM_028697192.1	F-box/kelch-repeat protein SKIP30, transcript variant X2	TCONS_00018697	aly-miR167a-5p	11	0.916667	1.07408e-08
XM_028697192.1	F-box/kelch-repeat protein SKIP30, transcript variant X2	TCONS_00018697	bna-miR167a	11	0.916667	1.07408e-08
XM_028697887.1	uncharacterized LOC110102019, transcript variant X1	XR_003701328.1	gma-miR4995	10	0.149254	5.78207e-14
XM_028697996.1	putative cis-zeatin O-glucosyltransferase	TCONS_00010760	aau-miR396	12	1	3.51794e-25
XM_028697996.1	putative cis-zeatin O-glucosyltransferase	TCONS_00010760	gma-miR396e	12	1	3.51794e-25
XM_028697996.1	putative cis-zeatin O-glucosyltransferase	TCONS_00010760	gma-miR396h	12	1	3.51794e-25
XM_028697996.1	putative cis-zeatin O-glucosyltransferase	TCONS_00010760	mdm-miR396a	12	1	3.51794e-25
XM_028697996.1	putative cis-zeatin O-glucosyltransferase	TCONS_00010760	NW_021318846.1_2647_star	12	1	3.51794e-25
XM_028697996.1	putative cis-zeatin O-glucosyltransferase	TCONS_00010760	pab-miR396a-5p	12	1	3.51794e-25
XM_028697996.1	putative cis-zeatin O-glucosyltransferase	TCONS_00010760	vca-miR396-5p	12	1	3.51794e-25
XM_028697996.1	putative cis-zeatin O-glucosyltransferase	XR_003700291.1	aau-miR396	12	0.444444	3.51794e-25
XM_028697996.1	putative cis-zeatin O-glucosyltransferase	XR_003700291.1	aof-miR396a	12	0.444444	3.51794e-25
XM_028697996.1	putative cis-zeatin O-glucosyltransferase	XR_003700291.1	gma-miR396e	12	0.444444	3.51794e-25
XM_028697996.1	putative cis-zeatin O-glucosyltransferase	XR_003700291.1	gma-miR396h	12	0.444444	3.51794e-25
XM_028697996.1	putative cis-zeatin O-glucosyltransferase	XR_003700291.1	mdm-miR396a	12	0.444444	3.51794e-25
XM_028697996.1	putative cis-zeatin O-glucosyltransferase	XR_003700291.1	NW_021318846.1_2647_star	12	0.444444	3.51794e-25
XM_028697996.1	putative cis-zeatin O-glucosyltransferase	XR_003700291.1	pab-miR396a-5p	12	0.444444	3.51794e-25
XM_028697996.1	putative cis-zeatin O-glucosyltransferase	XR_003700291.1	vca-miR396-5p	12	0.444444	3.51794e-25
XM_028697996.1	putative cis-zeatin O-glucosyltransferase	XR_003701085.1	aau-miR396	12	0.923077	3.51794e-25
XM_028697996.1	putative cis-zeatin O-glucosyltransferase	XR_003701085.1	aof-miR396a	12	0.923077	3.51794e-25
XM_028697996.1	putative cis-zeatin O-glucosyltransferase	XR_003701085.1	gma-miR396e	12	0.923077	3.51794e-25
XM_028697996.1	putative cis-zeatin O-glucosyltransferase	XR_003701085.1	gma-miR396h	12	0.923077	3.51794e-25
XM_028697996.1	putative cis-zeatin O-glucosyltransferase	XR_003701085.1	mdm-miR396a	12	0.923077	3.51794e-25
XM_028697996.1	putative cis-zeatin O-glucosyltransferase	XR_003701085.1	NW_021318846.1_2647_star	12	0.923077	3.51794e-25
XM_028697996.1	putative cis-zeatin O-glucosyltransferase	XR_003701085.1	pab-miR396a-5p	12	0.923077	3.51794e-25
XM_028697996.1	putative cis-zeatin O-glucosyltransferase	XR_003701085.1	vca-miR396-5p	12	0.923077	3.51794e-25
XM_028697996.1	putative cis-zeatin O-glucosyltransferase	XR_003701912.1	aau-miR396	12	0.705882	3.51794e-25
XM_028697996.1	putative cis-zeatin O-glucosyltransferase	XR_003701912.1	aof-miR396a	12	0.705882	3.51794e-25
XM_028697996.1	putative cis-zeatin O-glucosyltransferase	XR_003701912.1	gma-miR396e	12	0.705882	3.51794e-25
XM_028697996.1	putative cis-zeatin O-glucosyltransferase	XR_003701912.1	gma-miR396h	12	0.705882	3.51794e-25
XM_028697996.1	putative cis-zeatin O-glucosyltransferase	XR_003701912.1	mdm-miR396a	12	0.705882	3.51794e-25
XM_028697996.1	putative cis-zeatin O-glucosyltransferase	XR_003701912.1	NW_021318846.1_2647_star	12	0.705882	3.51794e-25
XM_028697996.1	putative cis-zeatin O-glucosyltransferase	XR_003701912.1	pab-miR396a-5p	12	0.705882	3.51794e-25
XM_028697996.1	putative cis-zeatin O-glucosyltransferase	XR_003701912.1	vca-miR396-5p	12	0.705882	3.51794e-25
XM_028698239.1	putative disease resistance RPP13-like protein 1	TCONS_00025990	aly-miR395d-3p	10	0.833333	2.02782e-12
XM_028698239.1	putative disease resistance RPP13-like protein 1	TCONS_00025990	aof-miR395a	10	0.833333	2.02782e-12
XM_028698239.1	putative disease resistance RPP13-like protein 1	TCONS_00025990	ata-miR395e-3p	10	0.833333	2.02782e-12
XM_028698239.1	putative disease resistance RPP13-like protein 1	TCONS_00025990	cme-miR395b	10	0.833333	2.02782e-12
XM_028698239.1	putative disease resistance RPP13-like protein 1	TCONS_00025990	eun-miR395-3p	10	0.833333	2.02782e-12
XM_028698239.1	putative disease resistance RPP13-like protein 1	TCONS_00025990	osa-miR395b	10	0.833333	2.02782e-12
XM_028698239.1	putative disease resistance RPP13-like protein 1	TCONS_00025990	sly-miR395a	10	0.833333	2.02782e-12
XM_028698239.1	putative disease resistance RPP13-like protein 1	XR_003701379.1	aly-miR395d-3p	10	0.714286	2.02782e-12
XM_028698239.1	putative disease resistance RPP13-like protein 1	XR_003701379.1	cme-miR395b	10	0.714286	2.02782e-12
XM_028698239.1	putative disease resistance RPP13-like protein 1	XR_003701379.1	eun-miR395-3p	10	0.714286	2.02782e-12
XM_028698239.1	putative disease resistance RPP13-like protein 1	XR_003701379.1	osa-miR395b	10	0.714286	2.02782e-12
XM_028698239.1	putative disease resistance RPP13-like protein 1	XR_003701379.1	sly-miR395a	10	0.714286	2.02782e-12
XM_028698239.1	putative disease resistance RPP13-like protein 1	XR_003701381.1	aly-miR395d-3p	10	0.714286	2.02782e-12
XM_028698239.1	putative disease resistance RPP13-like protein 1	XR_003701381.1	cme-miR395b	10	0.714286	2.02782e-12
XM_028698239.1	putative disease resistance RPP13-like protein 1	XR_003701381.1	eun-miR395-3p	10	0.714286	2.02782e-12
XM_028698239.1	putative disease resistance RPP13-like protein 1	XR_003701381.1	osa-miR395b	10	0.714286	2.02782e-12
XM_028698239.1	putative disease resistance RPP13-like protein 1	XR_003701381.1	sly-miR395a	10	0.714286	2.02782e-12
XM_028698746.1	nuclear transcription factor Y subunit A-9, transcript variant X1	XR_003701328.1	aly-miR169a-5p	25	0.373134	2.71307e-37
XM_028698746.1	nuclear transcription factor Y subunit A-9, transcript variant X1	XR_003701328.1	gma-miR169c	25	0.373134	2.71307e-37
XM_028699134.1	uncharacterized LOC110101298	TCONS_00032841	aly-miR159c-3p	15	0.555556	1.03881e-14
XM_028699134.1	uncharacterized LOC110101298	TCONS_00032841	bdi-miR159a-3p	15	0.555556	1.03881e-14
XM_028699134.1	uncharacterized LOC110101298	TCONS_00032841	cme-miR159b	15	0.555556	1.03881e-14
XM_028699134.1	uncharacterized LOC110101298	TCONS_00032841	cpa-miR159b	15	0.555556	1.03881e-14
XM_028699134.1	uncharacterized LOC110101298	TCONS_00032841	fve-miR159c	15	0.555556	1.03881e-14
XM_028699134.1	uncharacterized LOC110101298	TCONS_00032841	osa-miR159d	15	0.555556	1.03881e-14
XM_028699134.1	uncharacterized LOC110101298	TCONS_00032841	pta-miR159a	15	0.555556	1.03881e-14
XM_028699134.1	uncharacterized LOC110101298	TCONS_00032841	pta-miR159c	15	0.555556	1.03881e-14
XM_028699134.1	uncharacterized LOC110101298	TCONS_00032841	ptc-miR159d	15	0.555556	1.03881e-14
XM_028699134.1	uncharacterized LOC110101298	TCONS_00032842	aly-miR159c-3p	15	0.483871	1.03881e-14
XM_028699134.1	uncharacterized LOC110101298	TCONS_00032842	bdi-miR159a-3p	15	0.483871	1.03881e-14
XM_028699134.1	uncharacterized LOC110101298	TCONS_00032842	cme-miR159b	15	0.483871	1.03881e-14
XM_028699134.1	uncharacterized LOC110101298	TCONS_00032842	cpa-miR159b	15	0.483871	1.03881e-14
XM_028699134.1	uncharacterized LOC110101298	TCONS_00032842	fve-miR159c	15	0.483871	1.03881e-14
XM_028699134.1	uncharacterized LOC110101298	TCONS_00032842	osa-miR159d	15	0.483871	1.03881e-14
XM_028699134.1	uncharacterized LOC110101298	TCONS_00032842	pta-miR159a	15	0.483871	1.03881e-14
XM_028699134.1	uncharacterized LOC110101298	TCONS_00032842	pta-miR159c	15	0.483871	1.03881e-14
XM_028699134.1	uncharacterized LOC110101298	TCONS_00032842	ptc-miR159d	15	0.483871	1.03881e-14
XM_028699193.1	uncharacterized LOC110110061, transcript variant X4	XR_003701426.1	aly-miR159c-3p	12	0.428571	1.92357e-18
XM_028699193.1	uncharacterized LOC110110061, transcript variant X4	XR_003701426.1	aly-miR319c-3p	12	0.428571	1.92357e-18
XM_028699193.1	uncharacterized LOC110110061, transcript variant X4	XR_003701426.1	atr-miR319a	12	0.428571	1.92357e-18
XM_028699193.1	uncharacterized LOC110110061, transcript variant X4	XR_003701426.1	cme-miR319c	12	0.428571	1.92357e-18
XM_028699193.1	uncharacterized LOC110110061, transcript variant X4	XR_003701426.1	gma-miR319g	12	0.428571	1.92357e-18
XM_028699197.1	ubiquitin-like-specific protease 1D, transcript variant X5	XR_003701085.1	aau-miR396	13	1	2.6078e-24
XM_028699197.1	ubiquitin-like-specific protease 1D, transcript variant X5	XR_003701085.1	aof-miR396a	13	1	2.6078e-24
XM_028699197.1	ubiquitin-like-specific protease 1D, transcript variant X5	XR_003701085.1	gma-miR396e	13	1	2.6078e-24
XM_028699197.1	ubiquitin-like-specific protease 1D, transcript variant X5	XR_003701085.1	gma-miR396h	13	1	2.6078e-24
XM_028699197.1	ubiquitin-like-specific protease 1D, transcript variant X5	XR_003701085.1	mdm-miR396a	13	1	2.6078e-24
XM_028699197.1	ubiquitin-like-specific protease 1D, transcript variant X5	XR_003701085.1	NW_021318846.1_2647_star	13	1	2.6078e-24
XM_028699197.1	ubiquitin-like-specific protease 1D, transcript variant X5	XR_003701085.1	pab-miR396a-5p	13	1	2.6078e-24
XM_028699197.1	ubiquitin-like-specific protease 1D, transcript variant X5	XR_003701085.1	vca-miR396-5p	13	1	2.6078e-24
XM_028699197.1	ubiquitin-like-specific protease 1D, transcript variant X5	TCONS_00010760	aau-miR396	12	1	3.84459e-21
XM_028699197.1	ubiquitin-like-specific protease 1D, transcript variant X5	TCONS_00010760	gma-miR396e	12	1	3.84459e-21
XM_028699197.1	ubiquitin-like-specific protease 1D, transcript variant X5	TCONS_00010760	gma-miR396h	12	1	3.84459e-21
XM_028699197.1	ubiquitin-like-specific protease 1D, transcript variant X5	TCONS_00010760	mdm-miR396a	12	1	3.84459e-21
XM_028699197.1	ubiquitin-like-specific protease 1D, transcript variant X5	TCONS_00010760	NW_021318846.1_2647_star	12	1	3.84459e-21
XM_028699197.1	ubiquitin-like-specific protease 1D, transcript variant X5	TCONS_00010760	pab-miR396a-5p	12	1	3.84459e-21
XM_028699197.1	ubiquitin-like-specific protease 1D, transcript variant X5	TCONS_00010760	vca-miR396-5p	12	1	3.84459e-21
XM_028699197.1	ubiquitin-like-specific protease 1D, transcript variant X5	XR_003701912.1	aau-miR396	12	0.705882	3.84459e-21
XM_028699197.1	ubiquitin-like-specific protease 1D, transcript variant X5	XR_003701912.1	aof-miR396a	12	0.705882	3.84459e-21
XM_028699197.1	ubiquitin-like-specific protease 1D, transcript variant X5	XR_003701912.1	gma-miR396e	12	0.705882	3.84459e-21
XM_028699197.1	ubiquitin-like-specific protease 1D, transcript variant X5	XR_003701912.1	gma-miR396h	12	0.705882	3.84459e-21
XM_028699197.1	ubiquitin-like-specific protease 1D, transcript variant X5	XR_003701912.1	mdm-miR396a	12	0.705882	3.84459e-21
XM_028699197.1	ubiquitin-like-specific protease 1D, transcript variant X5	XR_003701912.1	NW_021318846.1_2647_star	12	0.705882	3.84459e-21
XM_028699197.1	ubiquitin-like-specific protease 1D, transcript variant X5	XR_003701912.1	pab-miR396a-5p	12	0.705882	3.84459e-21
XM_028699197.1	ubiquitin-like-specific protease 1D, transcript variant X5	XR_003701912.1	vca-miR396-5p	12	0.705882	3.84459e-21
XM_028699308.1	receptor-like serine/threonine-protein kinase SD1-8	TCONS_00017098	aly-miR172a-3p	13	0.928571	2.6078e-24
XM_028699308.1	receptor-like serine/threonine-protein kinase SD1-8	TCONS_00017098	aly-miR172e-3p	13	0.928571	2.6078e-24
XM_028699308.1	receptor-like serine/threonine-protein kinase SD1-8	TCONS_00017098	aqc-miR172b	13	0.928571	2.6078e-24
XM_028699308.1	receptor-like serine/threonine-protein kinase SD1-8	TCONS_00017098	ata-miR172a-3p	13	0.928571	2.6078e-24
XM_028699308.1	receptor-like serine/threonine-protein kinase SD1-8	TCONS_00017098	gma-miR172k	13	0.928571	2.6078e-24
XM_028699521.1	ras-related protein RABE1c-like, transcript variant X3	XR_003701328.1	aly-miR169a-5p	21	0.313433	3.39231e-25
XM_028699521.1	ras-related protein RABE1c-like, transcript variant X3	XR_003701328.1	gma-miR169c	21	0.313433	3.39231e-25
XM_028699617.1	membrane protein of ER body-like protein, transcript variant X2	XR_003701085.1	aau-miR396	10	0.769231	0
XM_028699617.1	membrane protein of ER body-like protein, transcript variant X2	XR_003701085.1	aof-miR396a	10	0.769231	0
XM_028699617.1	membrane protein of ER body-like protein, transcript variant X2	XR_003701085.1	gma-miR396e	10	0.769231	0
XM_028699617.1	membrane protein of ER body-like protein, transcript variant X2	XR_003701085.1	NW_021318846.1_2647_star	10	0.769231	0
XM_028699617.1	membrane protein of ER body-like protein, transcript variant X2	XR_003701085.1	pab-miR396a-5p	10	0.769231	0
XM_028699617.1	membrane protein of ER body-like protein, transcript variant X2	XR_003701085.1	vca-miR396-5p	10	0.769231	0
XM_028700854.1	receptor-like protein 35, transcript variant X1	TCONS_00024832	aly-miR395d-3p	11	0.916667	9.44129e-20
XM_028700854.1	receptor-like protein 35, transcript variant X1	TCONS_00024832	ata-miR395e-3p	11	0.916667	9.44129e-20
XM_028700854.1	receptor-like protein 35, transcript variant X1	TCONS_00024832	cme-miR395b	11	0.916667	9.44129e-20
XM_028700854.1	receptor-like protein 35, transcript variant X1	TCONS_00024832	eun-miR395-3p	11	0.916667	9.44129e-20
XM_028700854.1	receptor-like protein 35, transcript variant X1	TCONS_00024832	sly-miR395a	11	0.916667	9.44129e-20
XM_028700854.1	receptor-like protein 35, transcript variant X1	TCONS_00025990	aly-miR395d-3p	11	0.916667	9.44129e-20
XM_028700854.1	receptor-like protein 35, transcript variant X1	TCONS_00025990	aof-miR395a	11	0.916667	9.44129e-20
XM_028700854.1	receptor-like protein 35, transcript variant X1	TCONS_00025990	ata-miR395e-3p	11	0.916667	9.44129e-20
XM_028700854.1	receptor-like protein 35, transcript variant X1	TCONS_00025990	cme-miR395b	11	0.916667	9.44129e-20
XM_028700854.1	receptor-like protein 35, transcript variant X1	TCONS_00025990	eun-miR395-3p	11	0.916667	9.44129e-20
XM_028700854.1	receptor-like protein 35, transcript variant X1	TCONS_00025990	osa-miR395b	11	0.916667	9.44129e-20
XM_028700854.1	receptor-like protein 35, transcript variant X1	TCONS_00025990	sly-miR395a	11	0.916667	9.44129e-20
XM_028701163.1	aluminum-activated malate transporter 10-like	TCONS_00010760	aau-miR396	10	0.833333	4.08284e-22
XM_028701163.1	aluminum-activated malate transporter 10-like	TCONS_00010760	gma-miR396e	10	0.833333	4.08284e-22
XM_028701163.1	aluminum-activated malate transporter 10-like	TCONS_00010760	gma-miR396h	10	0.833333	4.08284e-22
XM_028701163.1	aluminum-activated malate transporter 10-like	TCONS_00010760	NW_021318846.1_2647_star	10	0.833333	4.08284e-22
XM_028701163.1	aluminum-activated malate transporter 10-like	TCONS_00010760	pab-miR396a-5p	10	0.833333	4.08284e-22
XM_028701163.1	aluminum-activated malate transporter 10-like	TCONS_00010760	vca-miR396-5p	10	0.833333	4.08284e-22
XM_028701163.1	aluminum-activated malate transporter 10-like	XR_003700291.1	aau-miR396	10	0.37037	4.08284e-22
XM_028701163.1	aluminum-activated malate transporter 10-like	XR_003700291.1	aof-miR396a	10	0.37037	4.08284e-22
XM_028701163.1	aluminum-activated malate transporter 10-like	XR_003700291.1	gma-miR396e	10	0.37037	4.08284e-22
XM_028701163.1	aluminum-activated malate transporter 10-like	XR_003700291.1	gma-miR396h	10	0.37037	4.08284e-22
XM_028701163.1	aluminum-activated malate transporter 10-like	XR_003700291.1	NW_021318846.1_2647_star	10	0.37037	4.08284e-22
XM_028701163.1	aluminum-activated malate transporter 10-like	XR_003700291.1	pab-miR396a-5p	10	0.37037	4.08284e-22
XM_028701163.1	aluminum-activated malate transporter 10-like	XR_003700291.1	vca-miR396-5p	10	0.37037	4.08284e-22
XM_028701163.1	aluminum-activated malate transporter 10-like	XR_003701085.1	aau-miR396	10	0.769231	4.08284e-22
XM_028701163.1	aluminum-activated malate transporter 10-like	XR_003701085.1	aof-miR396a	10	0.769231	4.08284e-22
XM_028701163.1	aluminum-activated malate transporter 10-like	XR_003701085.1	gma-miR396e	10	0.769231	4.08284e-22
XM_028701163.1	aluminum-activated malate transporter 10-like	XR_003701085.1	gma-miR396h	10	0.769231	4.08284e-22
XM_028701163.1	aluminum-activated malate transporter 10-like	XR_003701085.1	NW_021318846.1_2647_star	10	0.769231	4.08284e-22
XM_028701163.1	aluminum-activated malate transporter 10-like	XR_003701085.1	pab-miR396a-5p	10	0.769231	4.08284e-22
XM_028701163.1	aluminum-activated malate transporter 10-like	XR_003701085.1	vca-miR396-5p	10	0.769231	4.08284e-22
XM_028701163.1	aluminum-activated malate transporter 10-like	XR_003701912.1	aau-miR396	10	0.588235	4.08284e-22
XM_028701163.1	aluminum-activated malate transporter 10-like	XR_003701912.1	aof-miR396a	10	0.588235	4.08284e-22
XM_028701163.1	aluminum-activated malate transporter 10-like	XR_003701912.1	gma-miR396e	10	0.588235	4.08284e-22
XM_028701163.1	aluminum-activated malate transporter 10-like	XR_003701912.1	gma-miR396h	10	0.588235	4.08284e-22
XM_028701163.1	aluminum-activated malate transporter 10-like	XR_003701912.1	NW_021318846.1_2647_star	10	0.588235	4.08284e-22
XM_028701163.1	aluminum-activated malate transporter 10-like	XR_003701912.1	pab-miR396a-5p	10	0.588235	4.08284e-22
XM_028701163.1	aluminum-activated malate transporter 10-like	XR_003701912.1	vca-miR396-5p	10	0.588235	4.08284e-22
